# Supplementary material for: Assessment of rock glaciers, water storage, and permafrost distribution in Guokalariju, Tibetan Plateau
Source: Copernicus journal article supplement (doi:10.5194/tc-2022-178), 2022-10-10
Supplement: Supplementary file 1 [file RgInventory-GKLRJ.xlsx]

## Sheet: Sheet1
Primary_ID	Associated RGS	Date	Data_source	Rock Glacier Morphology	Upslope Connection	Activity Assessment	Activity Class	Delineation type	Rock Glacier Composition	Shape_Length	Shape_Area	Mean altitude(m asl)	MEF(m asl)	MAP(mm)	MAGT(mm)	MAAT(mm)	Sub-region	Aspect class	Mean slope(°)	Latitude(°N)	Longitude(°E)	Cicoira-WVEQ(km3)-50%	Brenning-WVEQ(km3)-50%
RGU295251N0912420E	RGS295251N0912420E	20210114	Google Earth	Simple	Talus-connected	Geomorphological	Relict	Extended	Mono-unit	0.00706948	0.023802	5186.87	5159	290.731	0.16274	-1.03506	R1	NW	17.6131	29.5251	91.242
RGU295309N0912760E	RGS295309N0912760E	20210114	Google Earth	Simple	Talus-connected	Geomorphological	Relict	Extended	Mono-unit	0.00748883	0.0327672	5231.93	5192	300.268	0.086837	-1.66437	R1	N	18.0227	29.5309	91.276
RGU295016N0913699E	RGS295016N0913699E	20210114	Google Earth	Simple	Debris-mantled slope-connected	Geomorphological	Relict	Extended	Mono-unit	0.00518159	0.0156936	5267.94	5248	304.615	-0.20716	-1.74995	R1	N	20.7046	29.5016	91.3699
RGU294960N0913721E	RGS294960N0913721E	20210114	Google Earth	Simple	Debris-mantled slope-connected	Geomorphological	Relict	Extended	Mono-unit	0.00434456	0.0117545	5293.38	5273	298.912	-0.20716	-1.25764	R1	NE	19.7718	29.496	91.3721
RGU294960N0913892E	RGS294960N0913892E	20210114	Google Earth	Simple	Talus-connected	Geomorphological	Relict	Extended	Mono-unit	0.00429922	0.0131198	5218.07	5208	303.808	0.079399	-1.61754	R1	NW	16.962	29.496	91.3892
RGU294910N0913997E	RGS294910N0913997E	20161026	Google Earth	Simple	Debris-mantled slope-connected	Geomorphological	Active	Extended	Mono-unit	0.00497199	0.0154619	5256.85	5225	303.925	-0.17913	-1.66181	R1	N	23.6223	29.491	91.3997	8.22455e-05	0.000151111
RGU295001N0914050E	RGS295001N0914050E	20210114	Google Earth	Simple	Debris-mantled slope-connected	Geomorphological	Transitional	Extended	Mono-unit	0.00393397	0.0107779	5157.91	5140	308.083	0.048895	-1.81076	R1	NW	26.9515	29.5001	91.405	5.06856e-05	9.79993e-05
RGU294715N0914127E	RGS294715N0914127E	20161026	Google Earth	Simple	Debris-mantled slope-connected	Geomorphological	Active	Extended	Mono-unit	0.00647674	0.0264529	5224.17	5201	287.937	0.25903	-0.433912	R1	N	22.954	29.4715	91.4127	0.000144575	0.000287839
RGU294664N0914318E	RGS294664N0914318E	20161026	Google Earth	Simple	Debris-mantled slope-connected	Geomorphological	Relict	Extended	Mono-unit	0.00478632	0.012444	5209.8	5199	304.86	0.56301	-1.76361	R1	NW	18.9694	29.4664	91.4318
RGU295628N0914460E	RGS295628N0914460E	20210114	Google Earth	Simple	Talus-connected	Geomorphological	Relict	Extended	Mono-unit	0.00824127	0.0212302	5165.82	5143	310.635	0.30824	-1.45023	R1	NE	19.2784	29.5628	91.446
RGU295833N0914509E	RGS295833N0914509E	20210114	Google Earth	Complex	Talus-connected	Geomorphological	Relict	Extended	Mono-unit	0.00845568	0.0154711	5119.35	5104	318.707	0.016537	-1.97791	R1	NW	18.8986	29.5833	91.4509
RGU295263N0914540E	RGS295263N0914540E	20210114	Google Earth	Simple	Talus-connected	Geomorphological	Relict	Extended	Mono-unit	0.00583977	0.0171073	5138.74	5109	296.238	0.43205	-0.445949	R1	N	20.9746	29.5263	91.454
RGU295252N0914562E	RGS295252N0914562E	20210114	Google Earth	Simple	Talus-connected	Geomorphological	Relict	Extended	Mono-unit	0.00493047	0.0137718	5172.12	5164	287.665	0.43205	0.2743	R1	N	14.4991	29.5252	91.4562
RGU295504N0914943E	RGS295504N0914943E	20111204	Google Earth	Complex	Talus-connected	Geomorphological	Active	Extended	Mono-unit	0.00663978	0.0159968	5203.94	5190	309.901	0.0031373	-1.2518	R1	NE	23.0672	29.5504	91.4943	8.70225e-05	0.000157406
RGU295767N0915505E	RGS295767N0915505E	20201206	Google Earth	Simple	Talus-connected	Geomorphological	Relict	Extended	Mono-unit	0.00734525	0.0200976	5207.3	5194	325.054	-0.0097955	-1.96418	R1	NW	23.2747	29.5767	91.5505
RGU296382N0915725E	RGS296382N0915725E	20101207	Google Earth	Simple	Debris-mantled slope-connected	Geomorphological	Transitional	Extended	Mono-unit	0.00487916	0.0119991	5306.38	5287	332.828	-0.32485	-2.06763	R1	NW	31.5597	29.6382	91.5725	4.88656e-05	0.000111471
RGU296434N0915678E	RGS296434N0915678E	20101207	Google Earth	Simple	Debris-mantled slope-connected	Geomorphological	Active	Extended	Mono-unit	0.00876023	0.0237327	5214.04	5195	332.828	-0.056645	-2.06763	R1	E	20.8708	29.6434	91.5678	0.000141989	0.000252696
RGU296196N0915728E	RGS296196N0915728E	20101207	Google Earth	Complex	Debris-mantled slope-connected	Geomorphological	Relict	Extended	Mono-unit	0.010511	0.0338991	5152.62	5137	324.954	-0.0615982	-1.88696	R1	N	15.6997	29.6196	91.5728
RGU294748N0915768E	RGS294748N0915768E	20201206	Google Earth	Simple	Talus-connected	Geomorphological	Active	Extended	Mono-unit	0.00410498	0.0119208	5239.07	5223	311.848	0.23984	-1.68763	R1	N	18.9496	29.4748	91.5768	7.82437e-05	0.000110598
RGU296301N0915873E	RGS296301N0915873E	20141201	Google Earth	Simple	Debris-mantled slope-connected	Geomorphological	Relict	Extended	Mono-unit	0.00625456	0.0203	5249.55	5224	334.311	-0.45808	-2.11313	R1	N	17.467	29.6301	91.5873
RGU296621N0915870E	RGS296621N0915870E	20141201	Google Earth	Complex	Talus-connected	Geomorphological	Active	Extended	Mono-unit	0.00691887	0.0117144	5298.5	5283	333.821	0.82785	-1.81204	R1	N	24.3349	29.6621	91.587	6.05935e-05	0.000108305
RGU296401N0915883E	RGS296401N0915883E	20141201	Google Earth	Simple	Talus-connected	Geomorphological	Relict	Extended	Mono-unit	0.00712694	0.025028	5126.8	5100	337.842	-0.262977	-2.3559	R1	W	14.072	29.6401	91.5883
RGU295337N0915908E	RGS295337N0915908E	20201206	Google Earth	Complex	Talus-connected	Geomorphological	Active	Extended	Mono-unit	0.00853915	0.0223283	5238.74	5217	319.928	-0.1882	-1.72672	R1	NW	23.029	29.5337	91.5908	0.000121657	0.00023486
RGU294662N0915974E	RGS294662N0915974E	20201206	Google Earth	Complex	Debris-mantled slope-connected	Geomorphological	Transitional	Extended	Mono-unit	0.0160972	0.0941051	5194.85	5148	305.533	-0.0658817	-1.12934	R1	N	22.4327	29.4662	91.5974	0.000525633	0.00131983
RGU296344N0916193E	RGS296344N0916193E	20141201	Google Earth	Simple	Debris-mantled slope-connected	Geomorphological	Relict	Extended	Mono-unit	0.00608779	0.0216846	5232.04	5209	336.334	0.3654	-2.09364	R1	W	15.8692	29.6344	91.6193
RGU295806N0916254E	RGS295806N0916254E	20201206	Google Earth	Complex	Talus-connected	Geomorphological	Active	Extended	Mono-unit	0.0114915	0.0511218	5297.02	5266	330.777	-0.254376	-2.06682	R1	NE	16.1678	29.5806	91.6254	0.00039132	0.000634614
RGU295169N0916276E	RGS295169N0916276E	20201206	Google Earth	Simple	Debris-mantled slope-connected	Geomorphological	Relict	Extended	Mono-unit	0.00452533	0.0129722	5332.5	5324	320.157	0.03786	-1.76029	R1	N	11.1193	29.5169	91.6276
RGU295968N0916449E	RGS295968N0916449E	20201206	Google Earth	Simple	Debris-mantled slope-connected	Geomorphological	Relict	Extended	Mono-unit	0.00520571	0.0136602	5196.67	5169	338.494	-0.52173	-2.52738	R1	NE	23.8756	29.5968	91.6449
RGU295754N0916504E	RGS295754N0916504E	20201206	Google Earth	Complex	Talus-connected	Geomorphological	Transitional	Extended	Mono-unit	0.0105655	0.035892	5217.64	5196	319.443	0.28973	-1.09436	R1	NE	22.2076	29.5754	91.6504	0.000202406	0.000415126
RGU295326N0916546E	RGS295326N0916546E	20201206	Google Earth	Complex	Talus-connected	Geomorphological	Relict	Extended	Mono-unit	0.0068694	0.0214977	5230	5208	327.113	-0.238	-2.03815	R1	NE	20.0002	29.5326	91.6546
RGU295307N0916628E	RGS295307N0916628E	20201206	Google Earth	Complex	Talus-connected	Geomorphological	Relict	Extended	Mono-unit	0.00795761	0.022126	5218.23	5185	330.097	-0.053599	-2.1531	R1	W	20.8289	29.5307	91.6628
RGU295995N0916663E	RGS295995N0916663E	20201206	Google Earth	Simple	Talus-connected	Geomorphological	Relict	Extended	Mono-unit	0.00629506	0.0240864	5279.62	5259	338.551	0.77226	-2.41503	R1	W	15.8291	29.5995	91.6663
RGU295884N0916671E	RGS295884N0916671E	20201206	Google Earth	Complex	Talus-connected	Geomorphological	Relict	Extended	Mono-unit	0.00698218	0.0142688	5222.29	5206	326.095	0.50174	-1.44145	R1	NW	24.3669	29.5884	91.6671
RGU294440N0916734E	RGS294440N0916734E	20201206	Google Earth	Complex	Talus-connected	Geomorphological	Active	Extended	Mono-unit	0.00451626	0.0106462	5183.8	5177	311.444	-0.29565	-1.44167	R1	N	11.198	29.444	91.6734	0.000116848	9.6564e-05
RGU295288N0916748E	RGS295288N0916748E	20201206	Google Earth	Simple	Debris-mantled slope-connected	Geomorphological	Relict	Extended	Mono-unit	0.00558523	0.0200306	5259.04	5226	311.544	-0.093203	-0.745449	R1	NE	19.1494	29.5288	91.6748
RGU295274N0916760E	RGS295274N0916760E	20201206	Google Earth	Simple	Talus-connected	Geomorphological	Relict	Extended	Mono-unit	0.00429182	0.010216	5238.82	5230	311.544	-0.107023	-0.745449	R1	E	10.8676	29.5274	91.676
RGU295429N0916806E	RGS295429N0916806E	20201206	Google Earth	Simple	Talus-connected	Geomorphological	Relict	Extended	Mono-unit	0.00450146	0.0120941	5324.38	5295	331.72	0.14226	-2.23962	R1	NE	26.8894	29.5429	91.6806
RGU295647N0916802E	RGS295647N0916802E	20201206	Google Earth	Simple	Talus-connected	Geomorphological	Active	Extended	Mono-unit	0.00480142	0.0167803	5207.26	5186	316.393	0.12011	-0.808205	R1	N	21.3994	29.5647	91.6802	9.80256e-05	0.000166702
RGU295624N0916820E	RGS295624N0916820E	20201206	Google Earth	Simple	Debris-mantled slope-connected	Geomorphological	Relict	Extended	Mono-unit	0.00420999	0.0106134	5238.5	5223	331.144	0.12011	-2.00075	R1	NE	17.2884	29.5624	91.682
RGU294340N0916849E	RGS294340N0916849E	20201206	Google Earth	Complex	Talus-connected	Geomorphological	Active	Extended	Mono-unit	0.00619223	0.0133219	5274.18	5256	318.888	-0.224369	-2.06776	R1	NW	25.3275	29.434	91.6849	6.6376e-05	0.000126375
RGU295823N0916889E	RGS295823N0916889E	20201206	Google Earth	Complex	Talus-connected	Geomorphological	Relict	Extended	Mono-unit	0.0079774	0.0232034	5144.89	5115	322.92	0.49884	-1.18107	R1	W	26.5571	29.5823	91.6889
RGU294105N0917538E	RGS294105N0917538E	20141201	Google Earth	Complex	Debris-mantled slope-connected	Geomorphological	Relict	Extended	Mono-unit	0.00889879	0.0264805	5083.62	5059	304.823	1.147	-0.89051	R1	NE	18.1762	29.4105	91.7538
RGU294215N0917529E	RGS294215N0917529E	20141201	Google Earth	Complex	Talus-connected	Geomorphological	Active	Extended	Mono-unit	0.00631168	0.0106464	5185.85	5172	303.934	-0.2573	-0.718877	R1	W	22.2984	29.4215	91.7529	5.98063e-05	9.65665e-05
RGU294248N0917554E	RGS294248N0917554E	20141201	Google Earth	Complex	Talus-connected	Geomorphological	Active	Extended	Mono-unit	0.00704333	0.0226928	5241.89	5219	313.92	-0.263075	-1.53112	R1	W	27.5054	29.4248	91.7554	0.000104732	0.000239468
RGU293825N0917559E	RGS293825N0917559E	20141201	Google Earth	Simple	Talus-connected	Geomorphological	Transitional	Extended	Mono-unit	0.0058133	0.0144713	5151.42	5131	311.905	2.389	-1.68158	R1	NE	18.6499	29.3825	91.7559	9.64553e-05	0.00013957
RGU294112N0917571E	RGS294112N0917571E	20141201	Google Earth	Complex	Talus-connected	Geomorphological	Relict	Extended	Mono-unit	0.00738792	0.0205472	5116.4	5089	309.026	1.147	-1.24284	R1	NW	23.2591	29.4112	91.7571
RGU293811N0917581E	RGS293811N0917581E	20141201	Google Earth	Simple	Talus-connected	Geomorphological	Relict	Extended	Mono-unit	0.00688413	0.0309745	5133.44	5104	311.655	2.35959	-1.65867	R1	NE	15.68	29.3811	91.7581
RGU294286N0917602E	RGS294286N0917602E	20141201	Google Earth	Simple	Talus-connected	Geomorphological	Active	Extended	Mono-unit	0.00369054	0.0103083	5267.25	5249	313.92	-0.03269	-1.53112	R1	N	21.2082	29.4286	91.7602	6.07359e-05	9.28983e-05
RGU294480N0917601E	RGS294480N0917601E	20141201	Google Earth	Complex	Talus-connected	Geomorphological	Relict	Extended	Mono-unit	0.00654914	0.01374	5139.4	5112	321.335	-0.36275	-1.97387	R1	NW	18.6903	29.448	91.7601
RGU294008N0917609E	RGS294008N0917609E	20141201	Google Earth	Complex	Talus-connected	Geomorphological	Relict	Extended	Mono-unit	0.00879867	0.0148888	5132.05	5104	307.764	1.84944	-1.19372	R1	N	28.2373	29.4008	91.7609
RGU294430N0917604E	RGS294430N0917604E	20141201	Google Earth	Complex	Debris-mantled slope-connected	Geomorphological	Relict	Extended	Mono-unit	0.00610392	0.0175727	5217.84	5192	321.335	0.00159667	-1.97387	R1	NW	26.4859	29.443	91.7604
RGU294604N0917649E	RGS294604N0917649E	20141201	Google Earth	Complex	Talus-connected	Geomorphological	Transitional	Extended	Mono-unit	0.00736004	0.0264884	5054.94	5021	321.113	-0.35269	-1.81665	R1	N	19.6776	29.4604	91.7649	0.000167669	0.000288303
RGU294514N0917658E	RGS294514N0917658E	20141201	Google Earth	Complex	Talus-connected	Geomorphological	Relict	Extended	Mono-unit	0.0155701	0.0550169	5157.75	5111	322.933	-0.35934	-1.97647	R1	E	16.2705	29.4514	91.7658
RGU294490N0917666E	RGS294490N0917666E	20141201	Google Earth	Complex	Talus-connected	Geomorphological	Relict	Extended	Mono-unit	0.00747382	0.0193944	5191.57	5168	320.792	-0.36275	-1.84237	R1	NW	28.5882	29.449	91.7666
RGU294566N0917683E	RGS294566N0917683E	20141201	Google Earth	Simple	Talus-connected	Geomorphological	Relict	Extended	Mono-unit	0.00447344	0.0143834	5113.24	5089	323.5	-0.35269	-2.03011	R1	W	23.3268	29.4566	91.7683
RGU296094N0917772E	RGS296094N0917772E	20141201	Google Earth	Complex	Debris-mantled slope-connected	Geomorphological	Relict	Extended	Mono-unit	0.00984936	0.0310161	5034.14	4976	334.441	0.2436	-1.54606	R1	N	18.8156	29.6094	91.7772
RGU295191N0917757E	RGS295191N0917757E	20141201	Google Earth	Simple	Debris-mantled slope-connected	Geomorphological	Transitional	Extended	Mono-unit	0.00380887	0.0112944	5157.21	5134	320.488	0.22313	-1.17259	R1	NW	29.5095	29.5191	91.7757	4.88733e-05	0.000103662
RGU295091N0917782E	RGS295091N0917782E	20141201	Google Earth	Complex	Talus-connected	Geomorphological	Relict	Extended	Mono-unit	0.0056644	0.0120029	5120.71	5101	317.508	0.40638	-0.995521	R1	N	23.4403	29.5091	91.7782
RGU294324N0917876E	RGS294324N0917876E	20141201	Google Earth	Simple	Talus-connected	Geomorphological	Relict	Extended	Mono-unit	0.00695577	0.0256532	5027.17	5005	316.964	0.94688	-1.57885	R1	NE	13.4822	29.4324	91.7876
RGU294312N0917897E	RGS294312N0917897E	20141201	Google Earth	Simple	Talus-connected	Geomorphological	Active	Extended	Mono-unit	0.00514034	0.0183193	5076.11	5047	303.451	0.94688	-0.742518	R1	NW	25.928	29.4312	91.7897	8.93024e-05	0.000185214
RGU295552N0918250E	RGS295552N0918250E	20141201	Google Earth	Complex	Talus-connected	Geomorphological	Relict	Extended	Mono-unit	0.00679523	0.0228187	5079.38	5060	328.407	-0.3048	-1.4566	R1	NW	25.5303	29.5552	91.825
RGU295555N0918294E	RGS295555N0918294E	20141201	Google Earth	Complex	Talus-connected	Geomorphological	Relict	Extended	Mono-unit	0.00634505	0.0242475	5167.48	5144	333.315	-0.3048	-1.74072	R1	N	22.0721	29.5555	91.8294
RGU295921N0918335E	RGS295921N0918335E	20141201	Google Earth	Complex	Talus-connected	Geomorphological	Relict	Extended	Mono-unit	0.00481702	0.0140777	5155.75	5139	333.195	0.18923	-1.46165	R1	NW	19.9148	29.5921	91.8335
RGU295407N0918350E	RGS295407N0918350E	20141201	Google Earth	Complex	Talus-connected	Geomorphological	Active	Extended	Mono-unit	0.0055676	0.0101585	5197.08	5186	333.811	-0.031396	-1.96572	R1	NW	24.241	29.5407	91.835	5.27363e-05	9.128e-05
RGU295340N0918413E	RGS295340N0918413E	20141201	Google Earth	Complex	Talus-connected	Geomorphological	Relict	Extended	Mono-unit	0.00416397	0.0102097	5114.75	5095	328.913	0.730977	-1.51204	R1	W	25.2323	29.534	91.8413
RGU295420N0918464E	RGS295420N0918464E	20141201	Google Earth	Simple	Debris-mantled slope-connected	Geomorphological	Relict	Extended	Mono-unit	0.00673635	0.0213025	5058.25	5038	328.409	0.53366	-1.3527	R1	NW	27.0691	29.542	91.8464
RGU295923N0918576E	RGS295923N0918576E	20141201	Google Earth	Complex	Talus-connected	Geomorphological	Relict	Extended	Mono-unit	0.00535784	0.0151928	5094.68	5081	339.896	-0.46708	-1.88874	R1	NE	17.4942	29.5923	91.8576
RGU296251N0918659E	RGS296251N0918659E	20141201	Google Earth	Simple	Debris-mantled slope-connected	Geomorphological	Transitional	Extended	Mono-unit	0.00396993	0.0113049	5200.25	5183	346.49	-0.0833302	-1.93866	R1	N	24.7046	29.6251	91.8659	5.7654e-05	0.000103778
RGU295814N0918802E	RGS295814N0918802E	20141201	Google Earth	Simple	Debris-mantled slope-connected	Geomorphological	Relict	Extended	Mono-unit	0.00439812	0.0101231	5249.58	5239	330.817	-0.32442	-1.16721	R1	N	18.4486	29.5814	91.8802
RGU293657N0918925E	RGS293657N0918925E	20141201	Google Earth	Simple	Debris-mantled slope-connected	Geomorphological	Relict	Extended	Mono-unit	0.00504292	0.0183885	5045.18	5009	292.463	0.80464	0.310997	R1	N	27.2438	29.3657	91.8925
RGU295550N0919193E	RGS295550N0919193E	20141201	Google Earth	Complex	Debris-mantled slope-connected	Geomorphological	Relict	Extended	Mono-unit	0.00884246	0.0233171	5209.86	5193	331.1	0.37911	-1.38865	R1	N	24.1859	29.555	91.9193
RGU294897N0919412E	RGS294897N0919412E	20141201	Google Earth	Simple	Debris-mantled slope-connected	Geomorphological	Active	Extended	Mono-unit	0.00510866	0.0179391	5158.62	5114	333.473	-0.210052	-1.96522	R1	N	33.8357	29.4897	91.9412	6.86699e-05	0.00018061
RGU296550N0919458E	RGS296550N0919458E	20141201	Google Earth	Simple	Talus-connected	Geomorphological	Transitional	Extended	Mono-unit	0.0045945	0.0166687	5167.36	5149	346.564	-0.30568	-1.77784	R1	NW	17.3193	29.655	91.9458	0.000119345	0.000165373
RGU295243N0919464E	RGS295243N0919464E	20141201	Google Earth	Complex	Talus-connected	Geomorphological	Relict	Extended	Mono-unit	0.011762	0.0303211	5183.78	5151	339.511	0.0461802	-2.1835	R1	NW	21.2154	29.5243	91.9464
RGU293749N0919474E	RGS293749N0919474E	20141201	Google Earth	Simple	Talus-connected	Geomorphological	Relict	Extended	Mono-unit	0.00651965	0.0222768	5157.88	5123	314.585	0.63888	-1.24739	R1	NW	22.6547	29.3749	91.9474
RGU293674N0919605E	RGS293674N0919605E	20141201	Google Earth	Complex	Talus-connected	Geomorphological	Transitional	Extended	Mono-unit	0.00593267	0.017296	5149.52	5129	321.984	0.17356	-1.84207	R1	W	25.3667	29.3674	91.9605	8.60523e-05	0.000172869
RGU293412N0919636E	RGS293412N0919636E	20141201	Google Earth	Simple	Debris-mantled slope-connected	Geomorphological	Active	Extended	Mono-unit	0.00399566	0.0117242	5170.31	5141	296.346	0.52027	0.0797249	R1	NW	30.4411	29.3412	91.9636	4.93231e-05	0.000108414
RGU295472N0919647E	RGS295472N0919647E	20141201	Google Earth	Complex	Talus-connected	Geomorphological	Relict	Extended	Mono-unit	0.00584942	0.012934	5138.19	5111	345.204	-0.145022	-2.41791	R1	NW	28.6889	29.5472	91.9647
RGU296490N0919651E	RGS296490N0919651E	20141201	Google Earth	Complex	Talus-connected	Geomorphological	Transitional	Extended	Mono-unit	0.00422271	0.0131464	5119.75	5108	350.158	-0.54471	-2.0644	R1	NW	19.2203	29.649	91.9651	8.5118e-05	0.00012438
RGU296455N0919566E	RGS296455N0919566E	20141201	Google Earth	Simple	Talus-connected	Geomorphological	Active	Extended	Mono-unit	0.00384048	0.010359	5204.33	5186	343.983	-0.48092	-1.57981	R1	NW	24.5996	29.6455	91.9566	5.30414e-05	9.3447e-05
RGU295068N0919666E	RGS295068N0919666E	20141201	Google Earth	Complex	Talus-connected	Geomorphological	Active	Extended	Mono-unit	0.00568916	0.0146514	5217.28	5205	334.341	0.2774	-1.81653	R1	NW	21.229	29.5068	91.9666	8.62444e-05	0.000141657
RGU294735N0919868E	RGS294735N0919868E	20141201	Google Earth	Simple	Talus-connected	Geomorphological	Active	Extended	Mono-unit	0.00369417	0.0109952	5225.27	5212	336.273	0.32592	-2.15362	R1	N	15.3087	29.4735	91.9868	8.87658e-05	0.000100376
RGU295806N0919720E	RGS295806N0919720E	20141201	Google Earth	Complex	Talus-connected	Geomorphological	Relict	Extended	Mono-unit	0.00618703	0.0159342	5176.26	5163	346.174	-0.579072	-2.16958	R1	N	16.5856	29.5806	91.972
RGU295160N0919721E	RGS295160N0919721E	20141201	Google Earth	Simple	Talus-connected	Geomorphological	Active	Extended	Mono-unit	0.0044978	0.0142383	5195.18	5180	339.814	-0.11654	-2.16404	R1	N	18.1412	29.516	91.9721	9.74697e-05	0.000136877
RGU295386N0919719E	RGS295386N0919719E	20141201	Google Earth	Complex	Talus-connected	Geomorphological	Relict	Extended	Mono-unit	0.00692233	0.0231648	5191.8	5179	336.341	-0.14537	-1.70415	R1	NW	17.1838	29.5386	91.9719
RGU295218N0919770E	RGS295218N0919770E	20141201	Google Earth	Simple	Debris-mantled slope-connected	Geomorphological	Relict	Extended	Mono-unit	0.00543866	0.0173424	5260.95	5249	339.814	-0.44152	-2.16404	R1	SW	13.964	29.5218	91.977
RGU295740N0919816E	RGS295740N0919816E	20141201	Google Earth	Complex	Talus-connected	Geomorphological	Relict	Extended	Mono-unit	0.004334	0.0114717	5316	5297	349.331	-0.50622	-2.45667	R1	W	22.9973	29.574	91.9816
RGU295968N0919932E	RGS295968N0919932E	20141201	Google Earth	Complex	Talus-connected	Geomorphological	Active	Extended	Mono-unit	0.0195027	0.108372	5281.81	5213	352.137	-0.615359	-2.55352	R1	NW	16.1237	29.5968	91.9932	0.000831762	0.00156344
RGU296349N0919913E	RGS296349N0919913E	20141201	Google Earth	Simple	Talus-connected	Geomorphological	Active	Extended	Mono-unit	0.0102138	0.0622054	5289.33	5226	357.889	-0.460841	-2.74758	R1	W	19.8702	29.6349	91.9913	0.00039009	0.000803112
RGU296482N0919910E	RGS296482N0919910E	20141201	Google Earth	Simple	Talus-connected	Geomorphological	Relict	Extended	Mono-unit	0.00472495	0.0145532	5128.22	5117	361.274	-0.58598	-2.97411	R1	W	15.7698	29.6482	91.991
RGU296479N0919887E	RGS296479N0919887E	20141201	Google Earth	Simple	Talus-connected	Geomorphological	Relict	Extended	Mono-unit	0.00515496	0.0152297	5113.71	5102	347.721	-0.58598	-1.80749	R1	NE	9.61537	29.6479	91.9887
RGU295585N0919961E	RGS295585N0919961E	20141201	Google Earth	Simple	Talus-connected	Geomorphological	Active	Extended	Mono-unit	0.00451232	0.0132798	5258.75	5238	341.561	-0.855267	-1.99587	R1	N	18.9918	29.5585	91.9961	8.69777e-05	0.000125896
RGU295818N0919982E	RGS295818N0919982E	20141201	Google Earth	Simple	Talus-connected	Geomorphological	Active	Extended	Mono-unit	0.00553848	0.0122756	5269.13	5252	344.225	0.02802	-1.99471	R1	NE	27.8359	29.5818	91.9982	5.6035e-05	0.000114561
RGU295571N0920050E	RGS295571N0920050E	20141201	Google Earth	Simple	Talus-connected	Geomorphological	Active	Extended	Mono-unit	0.00470163	0.016006	5291.8	5268	346.603	-0.85518	-2.37685	R1	N	20.439	29.5571	92.005	9.76949e-05	0.000157515
RGU296306N0920108E	RGS296306N0920108E	20101207	Google Earth	Simple	Debris-mantled slope-connected	Geomorphological	Active	Extended	Mono-unit	0.00492326	0.0110354	5247.85	5243	357.383	-0.4318	-2.72865	R1	N	13.8532	29.6306	92.0108	9.82372e-05	0.000100815
RGU296684N0920252E	RGS296684N0920252E	20100208	Google Earth	Simple	Talus-connected	Geomorphological	Transitional	Extended	Mono-unit	0.0242472	0.162876	4973.37	4757	330.298	-0.241658	0.0260956	R1	NW	24.111	29.6684	92.0252	0.000849836	0.00254924
RGU296239N0920300E	RGS296239N0920300E	20100310	Google Earth	Complex	Talus-connected	Geomorphological	Active	Extended	Mono-unit	0.00638354	0.0240947	5259.45	5240	356.157	-0.10495	-2.60598	R1	N	14.5244	29.6239	92.03	0.000204779	0.000257329
RGU296288N0920332E	RGS296288N0920332E	20100310	Google Earth	Complex	Talus-connected	Geomorphological	Active	Extended	Mono-unit	0.0152123	0.0727622	5200.67	5172	355.171	-0.581643	-2.47975	R1	NW	15.6606	29.6288	92.0332	0.000574537	0.000969325
RGU295102N0920341E	RGS295102N0920341E	20100310	Google Earth	Simple	Talus-connected	Geomorphological	Active	Extended	Mono-unit	0.0074653	0.0266438	5225.43	5211	343.684	-1.0039	-2.36522	R1	NW	12.9112	29.5102	92.0341	0.000254162	0.000290334
RGU295545N0920357E	RGS295545N0920357E	20100310	Google Earth	Simple	Talus-connected	Geomorphological	Active	Extended	Mono-unit	0.0046208	0.0162045	5247.72	5227	345.251	-0.725525	-2.14979	R1	N	25.0146	29.5545	92.0357	8.1682e-05	0.000159862
RGU295821N0920371E	RGS295821N0920371E	20100310	Google Earth	Complex	Talus-connected	Geomorphological	Active	Extended	Mono-unit	0.016051	0.079173	5237.32	5204	351.549	-0.483432	-2.46015	R1	W	20.3714	29.5821	92.0371	0.000484779	0.00107269
RGU294388N0920390E	RGS294388N0920390E	20100310	Google Earth	Simple	Talus-connected	Geomorphological	Active	Extended	Mono-unit	0.00440776	0.0141303	5079.65	5067	328.394	0.405331	-1.63734	R1	NE	19.6228	29.4388	92.039	8.96834e-05	0.000135632
RGU295375N0920402E	RGS295375N0920402E	20100310	Google Earth	Simple	Talus-connected	Geomorphological	Active	Extended	Mono-unit	0.00594983	0.0162061	5336	5307	343.885	-0.89261	-2.15712	R1	W	26.132	29.5375	92.0402	7.84271e-05	0.00015988
RGU296257N0920425E	RGS296257N0920425E	20100310	Google Earth	Simple	Talus-connected	Geomorphological	Active	Extended	Mono-unit	0.0099122	0.0627799	5204.39	5183	352.035	-0.0607248	-2.18669	R1	W	12.1431	29.6257	92.0425	0.000636131	0.000812021
RGU295269N0920470E	RGS295269N0920470E	20100310	Google Earth	Simple	Talus-connected	Geomorphological	Active	Extended	Mono-unit	0.00445119	0.0155174	5302.95	5292	341.773	-0.734352	-2.04239	R1	NW	14.1017	29.5269	92.047	0.000135749	0.000151763
RGU295743N0920516E	RGS295743N0920516E	20100310	Google Earth	Simple	Talus-connected	Geomorphological	Active	Extended	Mono-unit	0.00740622	0.0274275	5289.79	5263	348.387	-0.36327	-2.25361	R1	NW	23.3972	29.5743	92.0516	0.000147217	0.000300612
RGU295823N0920538E	RGS295823N0920538E	20100310	Google Earth	Complex	Talus-connected	Geomorphological	Active	Extended	Mono-unit	0.0245133	0.0871168	5217.51	5167	342.455	-0.255969	-1.6696	R1	W	20.395	29.5823	92.0538	0.000532829	0.00120311
RGU295367N0920549E	RGS295367N0920549E	20100310	Google Earth	Simple	Talus-connected	Geomorphological	Active	Extended	Mono-unit	0.00633161	0.0237228	5241.85	5208	345.288	-1.09414	-2.25604	R1	NW	20.8166	29.5367	92.0549	0.000142282	0.00025257
RGU296370N0920556E	RGS296370N0920556E	20100310	Google Earth	Simple	Talus-connected	Geomorphological	Active	Extended	Mono-unit	0.00388958	0.0104367	5334.27	5322	359.678	-0.49695	-2.75985	R1	NW	17.0964	29.637	92.0556	7.56696e-05	9.42886e-05
RGU294844N0920557E	RGS294844N0920557E	20100310	Google Earth	Complex	Talus-connected	Geomorphological	Active	Extended	Mono-unit	0.00891571	0.0396628	5307.13	5278	342.981	-0.27944	-2.46936	R1	NW	17.7541	29.4844	92.0557	0.000277239	0.000467996
RGU296458N0920566E	RGS296458N0920566E	20100310	Google Earth	Complex	Talus-connected	Geomorphological	Active	Extended	Mono-unit	0.00670172	0.0278881	5279.12	5255	362.647	-0.34563	-2.95497	R1	N	15.2787	29.6458	92.0566	0.000225574	0.00030668
RGU296494N0920572E	RGS296494N0920572E	20100310	Google Earth	Complex	Talus-connected	Geomorphological	Active	Extended	Mono-unit	0.00946828	0.027139	5240.44	5212	362.247	-0.0381131	-2.89728	R1	W	21.5778	29.6494	92.0572	0.00015729	0.000296822
RGU296563N0920582E	RGS296563N0920582E	20100310	Google Earth	Complex	Talus-connected	Geomorphological	Active	Extended	Mono-unit	0.0125904	0.0504375	5158.84	5132	361.555	0.0049493	-2.81295	R1	W	20.3165	29.6563	92.0582	0.00030963	0.000624435
RGU296347N0920636E	RGS296347N0920636E	20100310	Google Earth	Simple	Talus-connected	Geomorphological	Active	Extended	Mono-unit	0.0042579	0.0130204	5322	5299	350.267	-0.24273	-1.94515	R1	N	24.1263	29.6347	92.0636	6.78959e-05	0.000122951
RGU295386N0920642E	RGS295386N0920642E	20100310	Google Earth	Simple	Talus-connected	Geomorphological	Active	Extended	Mono-unit	0.0072298	0.0289441	5311.79	5274	350.016	-1.1127	-2.61053	R1	NE	26.7606	29.5386	92.0642	0.000137015	0.000320668
RGU296560N0920663E	RGS296560N0920663E	20100208	Google Earth	Simple	Debris-mantled slope-connected	Geomorphological	Active	Extended	Mono-unit	0.00476535	0.0132879	5258.06	5232	354.343	0.0049493	-2.17752	R1	N	21.1048	29.656	92.0663	7.86574e-05	0.000125988
RGU295361N0920666E	RGS295361N0920666E	20100310	Google Earth	Simple	Talus-connected	Geomorphological	Active	Extended	Mono-unit	0.00469214	0.0150124	5338.63	5321	350.016	-0.952313	-2.61053	R1	N	18.4156	29.5361	92.0666	0.00010129	0.000145856
RGU296538N0920668E	RGS296545N0920673E	20100208	Google Earth	Complex	Talus-connected	Geomorphological	Active	Extended	Multi-unit	0.00749843	0.0351437	5302.51	5288	354.343	0.0684094	-2.17752	R1	N	10.3686	29.6538	92.0668	0.000416197	0.000404762
RGU293535N0920674E	RGS296545N0920673E	20100208	Google Earth	Complex	Talus-connected	Geomorphological	Active	Extended	Multi-unit	0.0071005	0.0296824	5286.11	5263	354.343	0.479804	-2.17752	R1	NW	14.1154	29.6551	92.0674	0.000259421	0.000330507
RGU296551N0920674E	RGS296172N0924548E	20100310	Google Earth	Simple	Talus-connected	Geomorphological	Active	Extended	Mono-unit	0.00734721	0.0301365	5287.16	5258	350.267	0.236458	-1.94515	R1	E	29.9831	29.6346	92.068	0.000128535	0.000336584
RGU295374N0920690E	RGS295996N0924566E	20100310	Google Earth	Simple	Talus-connected	Geomorphological	Active	Extended	Mono-unit	0.00771695	0.0298186	5299.83	5261	350.016	-1.05888	-2.61053	R1	N	22.4036	29.5374	92.069	0.00016676	0.000332328
RGU296420N0920709E	RGS295996N0924566E	20100208	Google Earth	Simple	Talus-connected	Geomorphological	Active	Extended	Mono-unit	0.00454056	0.0149343	5263.78	5235	355.191	-0.52858	-2.28258	R1	NW	28.9853	29.642	92.0709	6.56886e-05	0.000144945
RGU295738N0920721E	RGS295996N0924566E	20100310	Google Earth	Simple	Talus-connected	Geomorphological	Transitional	Extended	Mono-unit	0.0078409	0.0408177	5048.04	5003	332.347	-0.69231	-0.859896	R1	W	20.7192	29.5738	92.0721	0.000245913	0.000484396
RGU295375N0920722E	RGS296075N0924482E	20100310	Google Earth	Simple	Talus-connected	Geomorphological	Active	Extended	Mono-unit	0.00610047	0.0254794	5333.41	5285	350.016	-1.0506	-2.61053	R1	N	25.9056	29.5375	92.0722	0.000124306	0.000275175
RGU295307N0920730E	RGS296075N0924482E	20100310	Google Earth	Simple	Talus-connected	Geomorphological	Active	Extended	Mono-unit	0.00377505	0.0109184	5372.54	5344	342.651	-1.0121	-2.06362	R1	N	27.0469	29.5307	92.073	5.11791e-05	9.95348e-05
RGU293589N0920739E	RGS296075N0924482E	20191119	Google Earth	Simple	Talus-connected	Geomorphological	Active	Extended	Mono-unit	0.00387679	0.0100193	5053.17	5029	321.448	1.6023	-1.40604	R1	W	33.2558	29.3589	92.0739	3.89435e-05	8.97821e-05
RGU296302N0920752E	RGS295797N0924470E	20100310	Google Earth	Complex	Talus-connected	Geomorphological	Active	Extended	Mono-unit	0.00491486	0.0104863	5195	5175	332.029	0.3839	-0.385308	R1	NW	28.5211	29.6302	92.0752	4.68101e-05	9.48261e-05
RGU296328N0920769E	RGS295797N0924470E	20100310	Google Earth	Complex	Talus-connected	Geomorphological	Active	Extended	Mono-unit	0.0113028	0.0404712	5121.98	5095	347.366	0.398696	-1.68517	R1	NW	18.5273	29.6328	92.0769	0.000271474	0.000479466
RGU294154N0920781E	RGS295797N0924470E	20191119	Google Earth	Simple	Talus-connected	Geomorphological	Active	Extended	Mono-unit	0.00546619	0.018397	5155.79	5133	317.502	-0.094888	-0.823304	R1	N	15.7033	29.4154	92.0781	0.000144879	0.000186156
RGU296507N0920785E	RGS296769N0924696E	20100208	Google Earth	Complex	Talus-connected	Geomorphological	Active	Extended	Mono-unit	0.00576357	0.0111662	5077.15	5059	344.942	0.813	-1.33691	R1	NW	28.0478	29.6507	92.0785	5.06166e-05	0.000102252
RGU293916N0920836E	RGS296991N0924744E	20100310	Google Earth	Simple	Talus-connected	Geomorphological	Active	Extended	Mono-unit	0.00442956	0.0156813	5152.06	5127	327.051	0.35673	-1.67242	R1	NW	20.4129	29.3916	92.0836	9.58302e-05	0.000153688
RGU293626N0920814E	RGS296991N0924744E	20191119	Google Earth	Simple	Talus-connected	Geomorphological	Active	Extended	Mono-unit	0.00474044	0.0172279	5106.95	5059	321.948	1.6874	-1.36755	R1	N	28.2455	29.3626	92.0814	7.7592e-05	0.000172053
RGU295275N0920820E	RGS296026N0924845E	20100310	Google Earth	Complex	Talus-connected	Geomorphological	Active	Extended	Mono-unit	0.00919339	0.0436164	5257.57	5229	341.912	-0.678926	-1.99516	R1	W	22.9604	29.5275	92.082	0.000238318	0.00052452
RGU293645N0920854E	RGS296026N0924845E	20191119	Google Earth	Complex	Talus-connected	Geomorphological	Active	Extended	Mono-unit	0.0087449	0.0258544	5009.97	4990	319.893	1.6874	-1.24908	R1	N	17.3054	29.3645	92.0854	0.000185257	0.000280042
RGU293762N0920862E	RGS296026N0924845E	20191119	Google Earth	Complex	Talus-connected	Geomorphological	Active	Extended	Mono-unit	0.00786786	0.0214986	5062.71	5042	316.434	0.090153	-0.90475	R1	NW	15.7568	29.3762	92.0862	0.000168744	0.000224426
RGU293644N0920890E	RGS296375N0924652E	20191119	Google Earth	Simple	Talus-connected	Geomorphological	Active	Extended	Mono-unit	0.0083956	0.0436233	5060.45	5033	318.442	1.63365	-1.10282	R1	W	15.6982	29.3644	92.089	0.000343648	0.000524619
RGU294366N0920909E	RGS296375N0924652E	20100310	Google Earth	Complex	Talus-connected	Geomorphological	Active	Extended	Mono-unit	0.0144192	0.0728195	5190.54	5145	336.817	-0.0606262	-2.16584	R1	N	28.2405	29.4366	92.0909	0.000328022	0.000970242
RGU294728N0920897E	RGS296375N0924652E	20090216	Google Earth	Simple	Talus-connected	Geomorphological	Active	Extended	Mono-unit	0.00651609	0.0316935	5249.42	5219	340.563	0.079002	-2.24157	R1	N	22.6755	29.4728	92.0897	0.000175231	0.000357559
RGU294450N0920912E	RGS296375N0924652E	20191119	Google Earth	Simple	Talus-connected	Geomorphological	Active	Extended	Mono-unit	0.00582596	0.021132	5225.17	5199	332.41	-0.32383	-1.74196	R1	NW	19.5296	29.445	92.0912	0.000134737	0.000219842
RGU294279N0920904E	RGS296375N0924652E	20090216	Google Earth	Complex	Talus-connected	Geomorphological	Active	Extended	Mono-unit	0.00795992	0.0318024	5150.19	5121	320.849	-0.127148	-0.945041	R1	N	17.5472	29.4279	92.0904	0.000224833	0.000359033
RGU293775N0920934E	RGS296375N0924652E	20191119	Google Earth	Simple	Talus-connected	Geomorphological	Active	Extended	Mono-unit	0.00418693	0.0115025	5182.77	5164	316.403	0.089331	-0.899113	R1	W	21.5516	29.3775	92.0934	6.67422e-05	0.000105958
RGU295412N0920934E	RGS296667N0925107E	20100310	Google Earth	Simple	Talus-connected	Geomorphological	Active	Extended	Mono-unit	0.00396393	0.0112251	5244.13	5226	346.687	-0.32042	-2.33975	R1	N	22.9631	29.5412	92.0934	6.13267e-05	0.000102899
RGU294263N0920957E	RGS296667N0925107E	20191119	Google Earth	Simple	Talus-connected	Geomorphological	Active	Extended	Mono-unit	0.0043565	0.0118126	5190	5182	334.496	-0.23827	-2.02076	R1	N	13.0184	29.4263	92.0957	0.000111772	0.000109395
RGU295993N0920937E	RGS296798N0925066E	20100310	Google Earth	Complex	Talus-connected	Geomorphological	Active	Extended	Mono-unit	0.0100871	0.0434561	5256.06	5223	356.351	-0.492556	-2.59707	R1	W	16.5467	29.5993	92.0937	0.000325231	0.000522208
RGU294270N0920942E	RGS296798N0925066E	20191119	Google Earth	Complex	Talus-connected	Geomorphological	Active	Extended	Mono-unit	0.0050789	0.0167967	5183.09	5162	323.578	-0.23827	-1.05827	R1	N	21.2656	29.427	92.0942	9.87103e-05	0.000166898
RGU295265N0920959E	RGS296798N0925066E	20100310	Google Earth	Complex	Talus-connected	Geomorphological	Transitional	Extended	Mono-unit	0.00753071	0.0281971	5254.27	5243	345.745	-0.268005	-2.23504	R1	W	16.4089	29.5265	92.0959	0.000212754	0.000310762
RGU294735N0920972E	RGS296750N0925250E	20090216	Google Earth	Simple	Talus-connected	Geomorphological	Active	Extended	Mono-unit	0.00697645	0.0224647	5331.75	5319	343.125	-0.0471121	-2.41123	R1	N	20.3473	29.4735	92.0972	0.000137708	0.000236582
RGU294261N0920977E	RGS297829N0925098E	20191119	Google Earth	Simple	Talus-connected	Geomorphological	Active	Extended	Mono-unit	0.00797625	0.0343509	5234.02	5211	334.343	-0.23827	-2.01208	R1	W	16.4677	29.4261	92.0977	0.000258285	0.000393829
RGU293684N0920999E	RGS297829N0925098E	20191119	Google Earth	Complex	Talus-connected	Geomorphological	Active	Extended	Mono-unit	0.00824751	0.0248202	5127.43	5106	320.385	1.0035	-1.21389	R1	SW	15.9251	29.3684	92.0999	0.000192809	0.000266655
RGU293712N0921013E	RGS297829N0925098E	20191119	Google Earth	Simple	Debris-mantled slope-connected	Geomorphological	Active	Extended	Mono-unit	0.00481211	0.0149726	5179.59	5159	321.014	0.91527	-1.22802	R1	W	23.8939	29.3712	92.1013	7.87897e-05	0.000145391
RGU293790N0921037E	RGS298328N0925182E	20191119	Google Earth	Simple	Talus-connected	Geomorphological	Active	Extended	Mono-unit	0.00424668	0.0139049	5136.94	5129	321.098	0.64048	-1.23155	R1	NE	12.7591	29.379	92.1037	0.000134197	0.000133041
RGU294209N0921027E	RGS294787N0924993E	20090216	Google Earth	Simple	Talus-connected	Geomorphological	Active	Extended	Mono-unit	0.00553742	0.0138895	5273.87	5261	332.507	-0.21319	-1.90215	R1	N	25.9237	29.4209	92.1027	6.77184e-05	0.000132863
RGU294298N0921038E	RGS294787N0924993E	20090216	Google Earth	Simple	Talus-connected	Geomorphological	Active	Extended	Mono-unit	0.00439753	0.0121109	5231.08	5208	334.496	0.37072	-2.02076	R1	N	26.0533	29.4298	92.1038	5.87738e-05	0.000112719
RGU295895N0921040E	RGS295048N0925034E	20100310	Google Earth	Simple	Talus-connected	Geomorphological	Active	Extended	Mono-unit	0.00550655	0.0186328	5296.75	5278	349.176	-0.83035	-1.92983	R1	W	24.7868	29.5895	92.104	9.47305e-05	0.000189024
RGU295367N0921064E	RGS295048N0925034E	20100310	Google Earth	Simple	Talus-connected	Geomorphological	Active	Extended	Mono-unit	0.00872408	0.0319317	5187.65	5154	337.518	-0.41053	-1.41487	R1	N	18.5669	29.5367	92.1064	0.000213752	0.000360785
RGU295343N0921014E	RGS295048N0925034E	20100310	Google Earth	Simple	Talus-connected	Geomorphological	Active	Extended	Mono-unit	0.00451431	0.0144758	5279.94	5230	341.531	-0.78861	-1.81387	R1	N	33.0645	29.5343	92.1014	5.65531e-05	0.000139622
RGU295945N0921070E	RGS295034N0925196E	20100310	Google Earth	Simple	Talus-connected	Geomorphological	Active	Extended	Mono-unit	0.00650382	0.0245285	5222.72	5206	348.104	-0.62706	-1.92983	R1	N	13.6439	29.5945	92.107	0.000221638	0.000262899
RGU295292N0921086E	RGS295034N0925196E	20100310	Google Earth	Complex	Talus-connected	Geomorphological	Active	Extended	Mono-unit	0.00651975	0.0240853	5274.47	5251	354.211	-0.742401	-2.90036	R1	N	21.2946	29.5292	92.1086	0.00014136	0.000257208
RGU294231N0921109E	RGS295188N0925054E	20090216	Google Earth	Simple	Talus-connected	Geomorphological	Active	Extended	Mono-unit	0.00567615	0.0188561	5172.68	5160	336.383	-0.0905253	-2.17159	R1	NW	14.0114	29.4231	92.1109	0.000165999	0.000191745
RGU294284N0921138E	RGS295188N0925054E	20090216	Google Earth	Complex	Talus-connected	Geomorphological	Active	Extended	Mono-unit	0.0120005	0.0540149	5109.18	5082	334.155	0.237165	-1.95507	R1	N	15.0764	29.4284	92.1138	0.000442627	0.000677951
RGU295811N0921120E	RGS295144N0925123E	20100310	Google Earth	Simple	Talus-connected	Geomorphological	Active	Extended	Mono-unit	0.00625946	0.0270373	5267	5244	356.201	-0.3486	-2.69236	R1	N	18.2883	29.5811	92.112	0.000183649	0.000295488
RGU294847N0921113E	RGS295144N0925123E	20090216	Google Earth	Complex	Talus-connected	Geomorphological	Active	Extended	Mono-unit	0.00580604	0.0186586	5275.75	5260	343.521	0.22454	-2.34204	R1	NW	23.0322	29.4847	92.1113	0.000101649	0.000189337
RGU294402N0921130E	RGS295144N0925123E	20090216	Google Earth	Complex	Talus-connected	Geomorphological	Active	Extended	Mono-unit	0.00763015	0.0328126	5283.18	5243	337.159	0.63895	-2.10424	R1	N	25.8372	29.4402	92.113	0.000160478	0.000372762
RGU294170N0921175E	RGS296052N0925124E	20090216	Google Earth	Complex	Talus-connected	Geomorphological	Transitional	Extended	Mono-unit	0.0133923	0.0619666	5083.04	5028	321.562	0.40681	-0.990621	R1	NW	22.3531	29.417	92.1175	0.00034729	0.000799414
RGU294482N0921071E	RGS296052N0925124E	20090216	Google Earth	Complex	Talus-connected	Geomorphological	Active	Extended	Mono-unit	0.00908922	0.0349118	5134.74	5112	339.856	0.00073488	-2.27064	R1	W	16.6672	29.4482	92.1071	0.000259448	0.000401558
RGU294881N0921154E	RGS296052N0925124E	20090216	Google Earth	Complex	Talus-connected	Geomorphological	Active	Extended	Mono-unit	0.0102425	0.0281017	5244.09	5219	342.722	0.22454	-2.34734	R1	NW	23.4723	29.4881	92.1154	0.000150381	0.000309501
RGU294904N0921186E	RGS296058N0924914E	20090216	Google Earth	Complex	Talus-connected	Geomorphological	Active	Extended	Mono-unit	0.00767861	0.0251834	5209.87	5183	346.981	0.22454	-2.54445	R1	N	19.2698	29.4904	92.1186	0.00016265	0.000271344
RGU294403N0921201E	RGS296058N0924914E	20090216	Google Earth	Simple	Talus-connected	Geomorphological	Active	Extended	Mono-unit	0.00797746	0.0283094	5192.68	5162	319.974	0.660018	-0.684601	R1	N	24.846	29.4403	92.1201	0.000143606	0.000312248
RGU294995N0921214E	RGS296058N0924914E	20090216	Google Earth	Complex	Talus-connected	Geomorphological	Active	Extended	Mono-unit	0.0253537	0.0918895	5119.9	5073	339.741	-0.352344	-1.90946	R1	W	18.2021	29.4995	92.1214	0.000627007	0.00128263
RGU296548N0921205E	RGS298157N0925518E	20100208	Google Earth	Simple	Talus-connected	Geomorphological	Active	Extended	Mono-unit	0.0045904	0.0139236	5281	5260	344.513	-0.94163	-1.22356	R1	NE	22.2838	29.6548	92.1205	7.82649e-05	0.000133256
RGU295784N0921202E	RGS298157N0925518E	20100310	Google Earth	Simple	Talus-connected	Geomorphological	Active	Extended	Mono-unit	0.00376712	0.0104861	5304.38	5284	354.116	-0.03401	-2.56787	R1	NW	22.7755	29.5784	92.1202	5.77356e-05	9.48244e-05
RGU295798N0921157E	RGS298157N0925518E	20100310	Google Earth	Simple	Talus-connected	Geomorphological	Active	Extended	Mono-unit	0.00951315	0.0515384	5288.03	5223	355.74	-0.3486	-2.68252	R1	N	22.4612	29.5798	92.1157	0.000287527	0.000640825
RGU294252N0921229E	RGS296926N0925646E	20090216	Google Earth	Complex	Talus-connected	Geomorphological	Transitional	Extended	Mono-unit	0.010438	0.0325698	4972.5	4947	329.456	0.15253	-1.56552	R1	NW	20.6512	29.4252	92.1229	0.00019684	0.000369454
RGU296593N0921241E	RGS296926N0925646E	20100208	Google Earth	Complex	Talus-connected	Geomorphological	Transitional	Extended	Mono-unit	0.00810237	0.0460435	5130.49	5108	357.48	-0.94163	-2.21139	R1	N	11.6008	29.6593	92.1241	0.000488036	0.000559738
RGU295716N0921275E	RGS297669N0925295E	20100310	Google Earth	Complex	Talus-connected	Geomorphological	Active	Extended	Mono-unit	0.0106306	0.0360821	5258.45	5231	346.437	-0.14635	-1.9166	R1	NE	10.6197	29.5716	92.1275	0.000417317	0.000417765
RGU293418N0921324E	RGS295275N0925392E	20191119	Google Earth	Simple	Talus-connected	Geomorphological	Transitional	Extended	Mono-unit	0.00745292	0.026657	5079.1	5050	296.516	2.09886	0.714952	R1	NE	27.2535	29.3418	92.1324	0.000124077	0.000290507
RGU294547N0921336E	RGS295817N0925430E	20090216	Google Earth	Complex	Debris-mantled slope-connected	Geomorphological	Active	Extended	Mono-unit	0.0060939	0.0207072	5175.71	5156	334.196	0.38556	-1.70852	R1	N	21.6126	29.4547	92.1336	0.000119829	0.00021455
RGU294679N0921347E	RGS295817N0925430E	20191119	Google Earth	Complex	Talus-connected	Geomorphological	Active	Extended	Mono-unit	0.0118482	0.0400824	5113.02	5064	341.041	0.26539	-2.20949	R1	NW	21.3233	29.4679	92.1347	0.000234947	0.000473944
RGU294752N0921366E	RGS295817N0925430E	20191119	Google Earth	Simple	Talus-connected	Geomorphological	Active	Extended	Mono-unit	0.00642651	0.0150954	5018.62	5001	332.516	-0.0063947	-1.41057	R1	NW	23.2814	29.4752	92.1366	8.14052e-05	0.000146824
RGU295828N0921344E	RGS295817N0925430E	20100310	Google Earth	Simple	Talus-connected	Geomorphological	Active	Extended	Mono-unit	0.0084117	0.0455622	5269.21	5228	352.786	-0.177209	-2.39808	R1	NE	18.8525	29.5828	92.1344	0.000300538	0.000552724
RGU293411N0921344E	RGS296195N0922263E	20191119	Google Earth	Simple	Talus-connected	Geomorphological	Active	Extended	Mono-unit	0.00636642	0.0200579	5100.91	5058	296.516	2.181	0.714952	R1	NW	28.143	29.3411	92.1344	9.06402e-05	0.000206503
RGU294950N0921374E	RGS298503N0923106E	20100310	Google Earth	Simple	Talus-connected	Geomorphological	Active	Extended	Mono-unit	0.00604037	0.0139598	5134.19	5116	335.69	0.55031	-1.51908	R1	W	25.7437	29.495	92.1374	6.85044e-05	0.000133671
RGU295375N0921384E	RGS298503N0923106E	20100310	Google Earth	Complex	Talus-connected	Geomorphological	Active	Extended	Mono-unit	0.0113944	0.0431496	5202.1	5151	344.092	-0.0334567	-1.94021	R1	NW	24.906	29.5375	92.1384	0.000218392	0.000517792
RGU296126N0921380E	RGS298503N0923106E	20100310	Google Earth	Complex	Talus-connected	Geomorphological	Transitional	Extended	Mono-unit	0.00880837	0.0324007	5179.84	5155	350.776	-0.41985	-1.99852	R1	W	27.7127	29.6126	92.138	0.000148505	0.000367154
RGU293795N0921347E	RGS298004N0923064E	20191119	Google Earth	Complex	Talus-connected	Geomorphological	Active	Extended	Mono-unit	0.0218141	0.0838756	5129.38	5053	324.95	1.51672	-1.41372	R1	N	21.7711	29.3795	92.1347	0.000482009	0.0011496
RGU295857N0921409E	RGS298004N0923064E	20100310	Google Earth	Complex	Talus-connected	Geomorphological	Active	Extended	Mono-unit	0.0133396	0.108497	5206.24	5170	354.301	-0.218697	-2.48173	R1	N	13.4148	29.5857	92.1409	0.000996796	0.00156561
RGU295775N0921461E	RGS298687N0923151E	20100310	Google Earth	Simple	Talus-connected	Geomorphological	Active	Extended	Mono-unit	0.00786143	0.0337076	5223.02	5175	348.729	-0.40101	-2.02564	R1	NE	22.9277	29.5775	92.1461	0.000184425	0.000384996
RGU296355N0921420E	RGS298289N0923944E	20100310	Google Earth	Complex	Talus-connected	Geomorphological	Active	Extended	Mono-unit	0.00790499	0.0286661	5265.15	5240	356.493	-0.447594	-2.326	R1	W	21.0248	29.6355	92.142	0.000170304	0.000316974
RGU296271N0921433E	RGS293599N0924736E	20100310	Google Earth	Complex	Talus-connected	Geomorphological	Active	Extended	Mono-unit	0.00433438	0.0113535	5350.5	5328	347.611	-0.441508	-1.63536	R1	W	29.3203	29.6271	92.1433	4.94179e-05	0.000104313
RGU296614N0921434E	RGS293807N0924785E	20100208	Google Earth	Simple	Talus-connected	Geomorphological	Transitional	Extended	Mono-unit	0.00438659	0.010745	5145.58	5119	342.34	-0.70915	-0.891339	R1	N	29.5625	29.6614	92.1434	4.64204e-05	9.76408e-05
RGU296331N0921480E	RGS293807N0924785E	20100310	Google Earth	Complex	Talus-connected	Geomorphological	Active	Extended	Mono-unit	0.00666427	0.0233718	5337.19	5291	363.53	-0.43281	-2.88319	R1	W	34.9672	29.6331	92.148	8.69225e-05	0.000248092
RGU296548N0921485E	RGS293274N0924501E	20100208	Google Earth	Simple	Talus-connected	Geomorphological	Active	Extended	Mono-unit	0.0273276	0.173926	5239.71	5147	362.46	-0.794858	-2.66954	R1	NE	17.3989	29.6548	92.1485	0.00123976	0.00275817
RGU296494N0921503E	RGS294494N0924928E	20100208	Google Earth	Simple	Talus-connected	Geomorphological	Active	Extended	Mono-unit	0.0101236	0.0759943	5309.73	5270	366.08	-0.848925	-3.04519	R1	NE	12.9181	29.6494	92.1503	0.000724549	0.00102122
RGU296519N0921511E	RGS292194N0925469E	20100208	Google Earth	Simple	Talus-connected	Geomorphological	Active	Extended	Mono-unit	0.00727287	0.036637	5266.64	5246	361.971	-0.76679	-2.62643	R1	W	13.5908	29.6519	92.1511	0.000332317	0.000425487
RGU296444N0921558E	RGS294437N0925761E	20100208	Google Earth	Simple	Talus-connected	Geomorphological	Active	Extended	Mono-unit	0.00896726	0.0410128	5299.92	5247	364.599	-0.12855	-2.91452	R1	NE	14.3358	29.6444	92.1558	0.000353051	0.000487176
RGU295447N0921552E	RGS294437N0925761E	20100310	Google Earth	Simple	Talus-connected	Geomorphological	Active	Extended	Mono-unit	0.00416691	0.0114534	5104.81	5089	335.908	-0.19921	-1.12345	R1	NW	17.3172	29.5447	92.1552	8.2014e-05	0.000105416
RGU296587N0921579E	RGS294405N0925713E	20100208	Google Earth	Complex	Talus-connected	Geomorphological	Active	Extended	Mono-unit	0.00714383	0.0347008	5252.15	5234	363.69	-0.20042	-2.73928	R1	W	13.6709	29.6587	92.1579	0.000312946	0.000398648
RGU296611N0921566E	RGS294405N0925713E	20100208	Google Earth	Complex	Talus-connected	Geomorphological	Active	Extended	Mono-unit	0.0164916	0.0617595	5219.04	5166	367.739	-0.227631	-3.05586	R1	NE	20.5575	29.6611	92.1566	0.000374878	0.000796209
RGU296566N0921569E	RGS293544N0924219E	20100208	Google Earth	Simple	Talus-connected	Geomorphological	Active	Extended	Mono-unit	0.00380904	0.0107239	5298.62	5278	363.69	-0.20042	-2.73928	R1	N	17.5351	29.6566	92.1569	7.58655e-05	9.74105e-05
RGU296661N0921565E	RGS293544N0924219E	20100208	Google Earth	Complex	Talus-connected	Geomorphological	Transitional	Extended	Mono-unit	0.0102605	0.0443063	5169.98	5143	369.676	-0.32559	-3.19325	R1	NW	15.6313	29.6661	92.1565	0.000350485	0.000534491
RGU295353N0921580E	RGS293544N0924219E	20100310	Google Earth	Complex	Talus-connected	Geomorphological	Active	Extended	Mono-unit	0.00822753	0.0243684	5132.12	5110	346.017	-0.13365	-2.02201	R1	N	25.8535	29.5353	92.158	0.000119109	0.000260841
RGU296447N0921622E	RGS297471N0926263E	20100208	Google Earth	Complex	Talus-connected	Geomorphological	Transitional	Extended	Mono-unit	0.0134336	0.0731668	5222.28	5171	363.311	-0.320116	-2.78385	R1	NE	16.9108	29.6447	92.1622	0.000536133	0.000975796
RGU296702N0921621E	RGS297471N0926263E	20100208	Google Earth	Complex	Talus-connected	Geomorphological	Active	Extended	Mono-unit	0.0119434	0.0872545	5265	5200	365.442	0.19411	-2.84669	R1	NE	16.851	29.6702	92.1621	0.000641566	0.00120539
RGU296274N0921633E	RGS296123N0926809E	20100310	Google Earth	Complex	Talus-connected	Geomorphological	Active	Extended	Mono-unit	0.0102093	0.0772395	5159.97	5115	360.903	0.03447	-2.69132	R1	NW	20.6013	29.6274	92.1633	0.000467889	0.00104133
RGU296224N0921634E	RGS296123N0926809E	20100310	Google Earth	Complex	Talus-connected	Geomorphological	Active	Extended	Mono-unit	0.0156107	0.0537887	5194.08	5138	353.114	-0.22353	-2.16417	R1	W	19.7332	29.6224	92.1634	0.000339556	0.000674546
RGU296296N0921660E	RGS297438N0927336E	20100310	Google Earth	Simple	Talus-connected	Geomorphological	Active	Extended	Mono-unit	0.013257	0.08246	5225.9	5129	364.486	0.20647	-2.95773	R1	NW	22.5423	29.6296	92.166	0.000458465	0.00112635
RGU296168N0921660E	RGS297438N0927336E	20100310	Google Earth	Complex	Talus-connected	Geomorphological	Active	Extended	Mono-unit	0.00622108	0.0212202	5259.76	5243	359.979	-0.23311	-2.72976	R1	N	20.3154	29.6168	92.166	0.000130275	0.000220944
RGU296135N0921580E	RGS297438N0927336E	20100310	Google Earth	Simple	Talus-connected	Geomorphological	Active	Extended	Mono-unit	0.00615454	0.0270473	5274.09	5249	357.831	-0.64716	-2.51867	R1	N	15.2194	29.6135	92.158	0.000219606	0.000295619
RGU295858N0921660E	RGS296253N0927825E	20100310	Google Earth	Complex	Talus-connected	Geomorphological	Relict	Extended	Mono-unit	0.0112396	0.0592735	5042.91	5002	355.271	-0.50767	-2.46981	R1	W	19.1912	29.5858	92.166
RGU295948N0921672E	RGS296253N0927825E	20100310	Google Earth	Complex	Talus-connected	Geomorphological	Relict	Extended	Mono-unit	0.00978655	0.0316997	5007.95	4995	344.924	-0.0093761	-1.54358	R1	W	13.6195	29.5948	92.1672
RGU296393N0921683E	RGS296253N0927825E	20100208	Google Earth	Complex	Talus-connected	Geomorphological	Transitional	Extended	Mono-unit	0.0147118	0.0605988	5093.75	5064	347.587	-0.351114	-1.48909	R1	NW	13.8894	29.6393	92.1683	0.000538071	0.000778286
RGU296609N0921743E	RGS296253N0927825E	20100208	Google Earth	Complex	Talus-connected	Geomorphological	Transitional	Extended	Mono-unit	0.00836796	0.0299728	5208.86	5178	359.857	0.30684	-2.37247	R1	N	17.386	29.6609	92.1743	0.000213801	0.000334391
RGU296165N0921740E	RGS297404N0928435E	20100310	Google Earth	Simple	Talus-connected	Geomorphological	Active	Extended	Mono-unit	0.00476316	0.0128678	5236	5222	362.449	0.23741	-2.82126	R1	N	12.2772	29.6165	92.174	0.000128983	0.000121223
RGU297236N0925063E	RGS297404N0928435E	20100208	Google Earth	Complex	Debris-mantled slope-connected	Geomorphological	Relict	Extended	Mono-unit	0.0140817	0.0801815	5104.62	5055	363.366	0.16882	-1.96256	R2	N	12.3831	29.6431	92.4535
RGU297191N0925115E	RGS297533N0928556E	20100310	Google Earth	Simple	Debris-mantled slope-connected	Geomorphological	Relict	Extended	Mono-unit	0.00471286	0.0165309	5257.86	5229	371.165	-0.31702	-2.68193	R2	NW	21.9022	29.6333	92.4549
RGU297203N0925136E	RGS297533N0928556E	20100208	Google Earth	Complex	Talus-connected	Geomorphological	Transitional	Extended	Mono-unit	0.0122313	0.0660688	5017.34	4981	354.811	0.590415	-1.09162	R2	W	17.6538	29.6476	92.4622	0.000464355	0.000863333
RGU297245N0925240E	RGS296820N0929234E	20100208	Google Earth	Simple	Debris-mantled slope-connected	Geomorphological	Relict	Extended	Mono-unit	0.00673721	0.0217249	5118.43	5070	372.156	0.4748	-2.62144	R2	W	26.242	29.6433	92.4652
RGU297378N0925191E	RGS296820N0929234E	20100208	Google Earth	Simple	Talus-connected	Geomorphological	Relict	Extended	Mono-unit	0.00475136	0.0140075	5079.53	5051	370.613	0.4748	-2.50404	R2	SW	20.7007	29.6411	92.4651
RGU297385N0925083E	RGS297681N0929004E	20100310	Google Earth	Simple	Debris-mantled slope-connected	Geomorphological	Active	Extended	Mono-unit	0.00485758	0.0153453	5354.63	5308	370.215	-0.308616	-2.66779	R2	NW	21.6614	29.6153	92.4606	8.86104e-05	0.000149746
RGU297427N0925138E	RGS296172N0924548E	20100311	Google Earth	Simple	Debris-mantled slope-connected	Geomorphological	Relict	Extended	Multi-unit	0.0107847	0.0608838	5267.3	5229	362.656	-0.79997	-2.00565	R2	N	15.0657	29.6173	92.4549
RGU297483N0925183E	RGS296172N0924548E	20100310	Google Earth	Simple	Debris-mantled slope-connected	Geomorphological	Relict	Extended	Multi-unit	0.00949414	0.0265038	5280.97	5263	370.215	-0.79997	-2.66779	R2	NE	8.16635	29.6156	92.4566
RGU297493N0925148E	RGS296172N0924548E	20100310	Google Earth	Simple	Debris-mantled slope-connected	Geomorphological	Transitional	Extended	Multi-unit	0.00809817	0.0188551	5320.9	5283	370.215	-0.79997	-2.66779	R2	NE	16.8146	29.6147	92.4561	0.000138929	0.000191733
RGU297371N0924986E	RGS296034N0925995E	20100310	Google Earth	Simple	Debris-mantled slope-connected	Geomorphological	Active	Extended	Mono-unit	0.00569971	0.0177206	5207.19	5196	362.255	-0.465669	-2.01405	R2	NE	9.60962	29.6206	92.4506	0.00022626	0.000177974
RGU297405N0924910E	RGS296034N0925995E	20100310	Google Earth	Complex	Debris-mantled slope-connected	Geomorphological	Transitional	Extended	Mono-unit	0.0123822	0.0510155	5282.49	5230	363.676	-0.50609	-2.08465	R2	SW	17.9603	29.6197	92.4577	0.000352633	0.000633031
RGU297483N0924966E	RGS295996N0924566E	20100310	Google Earth	Simple	Debris-mantled slope-connected	Geomorphological	Active	Extended	Multi-unit	0.0120371	0.0505905	5271.8	5214	373.388	-0.66538	-2.92906	R2	SW	16.2635	29.5981	92.4573	0.000385037	0.000626709
RGU297644N0924979E	RGS295996N0924566E	20100310	Google Earth	Simple	Debris-mantled slope-connected	Geomorphological	Active	Extended	Multi-unit	0.0137566	0.0670653	5260.9	5196	371.763	-0.66538	-2.82947	R2	NW	16.4172	29.6002	92.4564	0.000505774	0.000878982
RGU297654N0925013E	RGS295996N0924566E	20100310	Google Earth	Simple	Debris-mantled slope-connected	Geomorphological	Active	Extended	Multi-unit	0.0135583	0.0436686	5351.94	5284	371.763	-0.559278	-2.82947	R2	SW	14.6191	29.5997	92.4599	0.000368782	0.000525274
RGU297511N0925060E	RGS295996N0924566E	20100310	Google Earth	Simple	Debris-mantled slope-connected	Geomorphological	Active	Extended	Multi-unit	0.00827584	0.0145202	5342.12	5308	371.763	-0.563021	-2.82947	R2	W	12.7237	29.5993	92.4604	0.000140518	0.000140136
RGU297770N0924908E	RGS295600N0926428E	20100310	Google Earth	Complex	Debris-mantled slope-connected	Geomorphological	Active	Extended	Mono-unit	0.0384674	0.367353	5297.4	5185	371.921	-0.604085	-2.88249	R2	W	15.7446	29.5933	92.461	0.00288556	0.00676524
RGU297783N0924944E	RGS295481N0926318E	20100310	Google Earth	Simple	Talus-connected	Geomorphological	Active	Extended	Mono-unit	0.00706497	0.0283842	5195.18	5157	359.918	-0.97082	-1.88958	R2	SW	17.7303	29.6053	92.4523	0.000198661	0.000313237
RGU297830N0925103E	RGS296075N0924482E	20100310	Google Earth	Simple	Debris-mantled slope-connected	Geomorphological	Transitional	Extended	Multi-unit	0.0166335	0.105429	5202.28	5162	357.181	-0.922192	-1.64613	R2	SW	12.79	29.6074	92.4481	0.00101508	0.00151263
RGU297795N0925050E	RGS296075N0924482E	20100310	Google Earth	Simple	Debris-mantled slope-connected	Geomorphological	Transitional	Extended	Multi-unit	0.00798996	0.0297066	5244.49	5227	355.344	-0.97082	-1.44855	R2	S	11.8683	29.6086	92.4516	0.000307873	0.000330831
RGU297823N0925151E	RGS296075N0924482E	20100310	Google Earth	Simple	Debris-mantled slope-connected	Geomorphological	Active	Extended	Multi-unit	0.0110077	0.0397215	5288.7	5256	362.261	-0.97082	-1.96737	R2	W	13.3834	29.6095	92.453	0.000365774	0.000468827
RGU297753N0925077E	RGS296075N0924482E	20100310	Google Earth	Simple	Debris-mantled slope-connected	Geomorphological	Active	Extended	Multi-unit	0.0111699	0.0441282	5347.98	5314	370.215	-0.97082	-2.66779	R2	W	12.5519	29.6082	92.4567	0.000432796	0.000531914
RGU297857N0924892E	RGS295504N0926894E	20181114	Google Earth	Complex	Talus-connected	Geomorphological	Active	Extended	Mono-unit	0.0189916	0.164615	5311.58	5242	372.072	-0.859513	-2.92125	R2	NE	12.0768	29.5863	92.4723	0.00167702	0.00258194
RGU297907N0924968E	RGS295162N0927529E	20100310	Google Earth	Simple	Debris-mantled slope-connected	Geomorphological	Active	Extended	Mono-unit	0.00401559	0.0114758	5404	5370	372.072	-0.29032	-2.92125	R2	E	33.5219	29.5864	92.467	4.42912e-05	0.000105662
RGU297972N0925108E	RGS295162N0927529E	20100310	Google Earth	Complex	Talus-connected	Geomorphological	Active	Extended	Mono-unit	0.00740186	0.0344603	5356.93	5331	371.275	-0.352288	-2.83148	R2	E	15.0326	29.5926	92.4654	0.00028319	0.000395336
RGU297991N0925030E	RGS295880N0927252E	20181114	Google Earth	Complex	Debris-mantled slope-connected	Geomorphological	Active	Extended	Mono-unit	0.0194552	0.119796	5291.96	5247	371.727	-0.55997	-2.8946	R2	SW	15.3709	29.5861	92.458	0.0009633	0.00176324
RGU298011N0925094E	RGS295880N0927252E	20181114	Google Earth	Complex	Debris-mantled slope-connected	Geomorphological	Active	Extended	Mono-unit	0.0124405	0.0486682	5371.84	5333	372.072	-0.304468	-2.92125	R2	SW	15.8697	29.5845	92.4626	0.000379351	0.000598241
RGU297991N0925193E	RGS295880N0927252E	20181114	Google Earth	Complex	Debris-mantled slope-connected	Geomorphological	Active	Extended	Mono-unit	0.0211674	0.201087	5344.83	5288	369.544	-0.463651	-2.71497	R2	N	12.7723	29.5811	92.4586	0.00193872	0.00328279
RGU297697N0925199E	RGS294927N0928008E	20181114	Google Earth	Complex	Debris-mantled slope-connected	Geomorphological	Active	Extended	Mono-unit	0.00815568	0.0260607	5248.52	5231	366.053	-0.55815	-2.42316	R2	NW	15.0223	29.5824	92.4538	0.000214307	0.000282726
RGU297637N0925150E	RGS295797N0924470E	20181114	Google Earth	Complex	Debris-mantled slope-connected	Geomorphological	Active	Extended	Multi-unit	0.0169383	0.104027	5147.97	5108	360.437	-0.91936	-2.07527	R2	N	13.4824	29.5796	92.4469	0.000951023	0.00148852
RGU298338N0925181E	RGS295797N0924470E	20181114	Google Earth	Complex	Debris-mantled slope-connected	Geomorphological	Active	Extended	Multi-unit	0.00836565	0.0402563	5134.96	5095	356.553	-0.91936	-1.85629	R1	N	15.6761	29.5792	92.4449	0.00031756	0.000476412
RGU298290N0925209E	RGS295797N0924470E	20181114	Google Earth	Simple	Debris-mantled slope-connected	Geomorphological	Active	Extended	Multi-unit	0.013418	0.0708478	5189.82	5151	360.337	-0.852469	-2.07336	R2	N	12.6858	29.5779	92.4478	0.000687638	0.000938802
RGU298312N0925125E	RGS295797N0924470E	20181114	Google Earth	Complex	Debris-mantled slope-connected	Geomorphological	Active	Extended	Multi-unit	0.0240022	0.188409	5229.91	5145	360.546	-0.622096	-2.07892	R2	W	12.0835	29.5778	92.4497	0.00191837	0.00303602
RGU294847N0925241E	RGS295797N0924470E	20181114	Google Earth	Complex	Debris-mantled slope-connected	Geomorphological	Active	Extended	Multi-unit	0.00715705	0.0286496	5179.58	5156	360.337	-0.55815	-2.07336	R2	W	14.16	29.5789	92.4505	0.000249623	0.000316757
RGU294826N0925222E	RGS295587N0928191E	20181114	Google Earth	Simple	Debris-mantled slope-connected	Geomorphological	Active	Extended	Mono-unit	0.0111528	0.0465941	5157.85	5123	353.273	-0.91936	-1.53847	R1	SW	16.4238	29.5758	92.4414	0.000351253	0.000567779
RGU294786N0925212E	RGS295234N0928651E	20181114	Google Earth	Complex	Debris-mantled slope-connected	Geomorphological	Relict	Extended	Mono-unit	0.0137182	0.0796769	5083.03	5048	355.915	-0.799365	-1.66958	R1	N	14.3327	29.5821	92.4407
RGU298315N0924878E	RGS295234N0928651E	20181114	Google Earth	Complex	Debris-mantled slope-connected	Geomorphological	Active	Extended	Mono-unit	0.0100587	0.0632502	5125.33	5097	354.803	-0.37455	-1.56943	R1	N	13.1086	29.5985	92.4437	0.000594426	0.000819325
RGU294752N0924909E	RGS295219N0928995E	20181114	Google Earth	Complex	Talus-connected	Geomorphological	Relict	Extended	Mono-unit	0.0111226	0.062285	5077.73	5042	365.142	-0.855287	-1.82812	R2	N	12.8011	29.6755	92.4679
RGU294694N0925067E	RGS296769N0924696E	20181031	Google Earth	Complex	Talus-connected	Geomorphological	Relict	Extended	Multi-unit	0.0193546	0.152467	5117.33	5044	365.233	-0.898948	-1.87337	R2	W	15.53	29.6766	92.47
RGU294814N0924967E	RGS296769N0924696E	20181031	Google Earth	Complex	Debris-mantled slope-connected	Geomorphological	Relict	Extended	Multi-unit	0.0114359	0.0758998	5089.58	5045	365.142	-0.893286	-1.74361	R2	W	13.3379	29.6788	92.47
RGU294771N0924974E	RGS296769N0924696E	20181031	Google Earth	Complex	Talus-connected	Geomorphological	Active	Extended	Multi-unit	0.00611112	0.0238875	5152.97	5129	365.142	-0.91151	-1.66473	R2	NW	13.6426	29.6792	92.4728	0.000215865	0.000254676
RGU294763N0925082E	RGS296769N0924696E	20181031	Google Earth	Complex	Talus-connected	Geomorphological	Active	Extended	Multi-unit	0.0073744	0.0263421	5167.86	5117	365.142	-0.91151	-1.82812	R2	W	20.1774	29.6782	92.4732	0.000162779	0.000286394
RGU294919N0924924E	RGS295139N0929486E	20151028	Google Earth	Complex	Talus-connected	Geomorphological	Active	Extended	Mono-unit	0.00961669	0.0455516	5388.23	5346	379.013	-0.020968	-3.07683	R2	SW	18.0058	29.6714	92.4837	0.000314096	0.00055257
RGU294880N0925125E	RGS295139N0929486E	20181031	Google Earth	Complex	Talus-connected	Geomorphological	Active	Extended	Mono-unit	0.0276943	0.348228	5077.39	5003	373.078	-0.629324	-2.28202	R2	N	12.2518	29.7093	92.4829	0.00349764	0.00634481
RGU295018N0924888E	RGS296991N0924744E	20181031	Google Earth	Simple	Talus-connected	Geomorphological	Active	Extended	Multi-unit	0.00418599	0.0131025	5378.75	5341	378.116	-1.0827	-2.78729	R2	N	22.204	29.6958	92.4856	7.39007e-05	0.000123882
RGU295287N0924815E	RGS296991N0924744E	20181031	Google Earth	Complex	Debris-mantled slope-connected	Geomorphological	Active	Extended	Multi-unit	0.0135004	0.0739065	5221.82	5161	375.605	-1.0143	-2.60515	R2	NW	17.7499	29.6977	92.4757	0.00051672	0.000987647
RGU294995N0924908E	RGS296991N0924744E	20181031	Google Earth	Complex	Glacier forefield-connected	Geomorphological	Active	Extended	Multi-unit	0.0191702	0.132168	5257.06	5207	375.525	-1.05571	-2.5692	R2	NW	10.4556	29.6997	92.4812	0.00155234	0.00198396
RGU295062N0924943E	RGS296991N0924744E	20181031	Google Earth	Simple	Talus-connected	Geomorphological	Active	Extended	Multi-unit	0.00995239	0.0521303	5153.58	5115	367.093	-1.0143	-1.88816	R2	N	14.1368	29.6989	92.4743	0.000454937	0.000649667
RGU297110N0925121E	RGS294588N0926596E	20181031	Google Earth	Complex	Debris-mantled slope-connected	Geomorphological	Active	Extended	Mono-unit	0.0111979	0.0768983	4958.23	4923	357.786	-0.39005	-0.834866	R2	N	14.407	29.7134	92.4729	0.000658762	0.00103582
RGU295008N0924956E	RGS294531N0926561E	20181031	Google Earth	Simple	Talus-connected	Geomorphological	Active	Extended	Mono-unit	0.00387845	0.0106284	5038.36	5025	371.184	0.030437	-1.6139	R2	N	15.9438	29.7986	92.4517	8.24697e-05	9.63709e-05
RGU294986N0924983E	RGS294531N0926561E	20181031	Google Earth	Complex	Talus-connected	Geomorphological	Active	Extended	Mono-unit	0.00647403	0.0168888	5051.22	5036	372.203	0.0805447	-1.70891	R2	NE	20.88	29.7928	92.4589	0.000101	0.000167997
RGU295104N0924981E	RGS294684N0927107E	20181031	Google Earth	Complex	Talus-connected	Geomorphological	Active	Extended	Mono-unit	0.00737597	0.024387	5096.6	5083	372.203	0.12758	-1.70891	R2	NW	16.4904	29.7915	92.4631	0.000183122	0.00026108
RGU295012N0925038E	RGS294684N0927107E	20181031	Google Earth	Simple	Talus-connected	Geomorphological	Active	Extended	Mono-unit	0.00595187	0.025582	5101.69	5079	373.581	-0.189091	-1.7317	R2	N	25.0214	29.7991	92.4701	0.000128918	0.000276505
RGU295043N0925030E	RGS294202N0927612E	20181031	Google Earth	Complex	Talus-connected	Geomorphological	Active	Extended	Mono-unit	0.00909118	0.0469001	5119.43	5092	373.34	-0.171632	-1.70128	R2	N	18.2031	29.8005	92.4735	0.000320006	0.000572257
RGU295062N0925031E	RGS294202N0927612E	20181031	Google Earth	Complex	Talus-connected	Geomorphological	Active	Extended	Mono-unit	0.0104856	0.0323566	5012	4981	363.214	0.247202	-1.00484	R2	W	20.1245	29.7738	92.4537	0.000200449	0.000366554
RGU295072N0925032E	RGS294147N0928100E	20181031	Google Earth	Complex	Debris-mantled slope-connected	Geomorphological	Active	Extended	Mono-unit	0.00415816	0.0105173	5175.67	5161	373.066	-0.17689	-1.45115	R2	N	19.2504	29.8303	92.4872	6.79933e-05	9.5163e-05
RGU295019N0925071E	RGS294147N0928100E	20181114	Google Earth	Complex	Debris-mantled slope-connected	Geomorphological	Active	Extended	Mono-unit	0.0165282	0.123064	5301.13	5226	353.64	-0.954858	-1.9142	R2	N	13.4015	29.4761	92.4629	0.00113174	0.00182113
RGU295061N0925177E	RGS294147N0928100E	20181114	Google Earth	Complex	Debris-mantled slope-connected	Geomorphological	Active	Extended	Mono-unit	0.0131204	0.0942589	5216.22	5159	351.967	-0.807502	-1.80242	R2	W	17.1764	29.4737	92.4595	0.000680322	0.00132242
RGU294970N0925186E	RGS294574N0928368E	20181114	Google Earth	Simple	Debris-mantled slope-connected	Geomorphological	Active	Extended	Mono-unit	0.010875	0.0621851	5245.59	5175	355.3	-0.847754	-2.11244	R2	W	20.309	29.4718	92.461	0.000381882	0.000802797
RGU295043N0925168E	RGS294574N0928368E	20181114	Google Earth	Complex	Talus-connected	Geomorphological	Active	Extended	Mono-unit	0.0566512	0.544526	5169.09	5061	353.056	-0.712325	-1.96526	R1	N	14.0529	29.4712	92.4526	0.00477986	0.0108494
RGU295033N0925193E	RGS294574N0928368E	20181114	Google Earth	Complex	Talus-connected	Geomorphological	Active	Extended	Mono-unit	0.0337238	0.341922	5272.59	5183	359.946	-0.994138	-2.38079	R2	NW	14.4461	29.4807	92.4657	0.00292137	0.00620719
RGU295013N0925228E	RGS294652N0928031E	20181114	Google Earth	Complex	Talus-connected	Geomorphological	Active	Extended	Mono-unit	0.022038	0.168587	5292.48	5202	364.809	-1.01133	-2.73146	R2	SW	17.2963	29.4858	92.4688	0.00120861	0.00265688
RGU295119N0924868E	RGS294652N0928031E	20181114	Google Earth	Complex	Debris-mantled slope-connected	Geomorphological	Active	Extended	Mono-unit	0.0256901	0.24808	5185	5134	351.855	-0.715893	-1.78302	R2	N	13.7607	29.481	92.4579	0.00222296	0.00422369
RGU295175N0924938E	RGS294672N0928063E	20181114	Google Earth	Complex	Talus-connected	Geomorphological	Active	Extended	Mono-unit	0.0273066	0.116489	5284.42	5210	360.072	-0.576776	-2.36472	R2	SW	21.4079	29.4756	92.4796	0.000680241	0.001705
RGU295243N0924978E	RGS294672N0928063E	20181114	Google Earth	Complex	Talus-connected	Geomorphological	Active	Extended	Mono-unit	0.0428029	0.273275	5276.92	5145	360.217	-0.266701	-2.35747	R2	NE	20.1602	29.4746	92.4846	0.00169006	0.00474353
RGU295360N0924934E	RGS293718N0928789E	20181114	Google Earth	Simple	Debris-mantled slope-connected	Geomorphological	Active	Extended	Mono-unit	0.00565519	0.0215831	5406.64	5367	366.118	-1.07892	-2.78503	R2	SE	25.9803	29.4884	92.4808	0.000105015	0.000225486
RGU295188N0925034E	RGS293718N0928789E	20181114	Google Earth	Complex	Talus-connected	Geomorphological	Active	Extended	Mono-unit	0.0299126	0.204609	5306.05	5238	363.41	-0.228288	-2.55775	R2	SW	21.4289	29.4847	92.4867	0.0011937	0.0033519
RGU295185N0925061E	RGS292337N0926125E	20181114	Google Earth	Complex	Talus-connected	Geomorphological	Transitional	Extended	Mono-unit	0.0471764	0.55762	5207.11	5112	355.419	-0.61767	-1.98907	R1	N	13.4898	29.5004	92.4571	0.00509507	0.0111632
RGU295381N0925266E	RGS292337N0926125E	20181114	Google Earth	Complex	Talus-connected	Geomorphological	Transitional	Extended	Mono-unit	0.0212879	0.168604	5240.87	5179	356.396	-0.94589	-2.01014	R2	N	12.3075	29.4959	92.4688	0.00168594	0.00265719
RGU295153N0925105E	RGS292481N0925935E	20181114	Google Earth	Complex	Talus-connected	Geomorphological	Relict	Extended	Mono-unit	0.0220262	0.186873	5267.38	5179	362.254	-0.435108	-2.45237	R2	SW	15.0489	29.4969	92.4798
RGU295128N0925285E	RGS292481N0925935E	20181114	Google Earth	Simple	Debris-mantled slope-connected	Geomorphological	Active	Extended	Mono-unit	0.0054926	0.0225375	5264.67	5227	365.619	-0.899976	-2.68046	R2	N	30.5055	29.5074	92.4811	9.46328e-05	0.000237503
RGU295128N0925134E	RGS292481N0925935E	20181114	Google Earth	Complex	Talus-connected	Geomorphological	Active	Extended	Mono-unit	0.0168416	0.141663	5286.28	5212	367.16	-1.2966	-2.61655	R2	N	23.2987	29.5368	92.4879	0.000763412	0.0021562
RGU295284N0925312E	RGS292575N0926062E	20181114	Google Earth	Complex	Talus-connected	Geomorphological	Active	Extended	Mono-unit	0.0207874	0.225956	5236.18	5157	364.429	-1.23524	-2.43362	R2	N	19.0186	29.5388	92.4808	0.00147791	0.00377582
RGU295374N0925456E	RGS292575N0926062E	20181114	Google Earth	Complex	Talus-connected	Geomorphological	Transitional	Extended	Mono-unit	0.0539744	0.731206	5215.13	5128	352.846	-0.344463	-1.64186	R2	NW	13.3829	29.5305	92.4634	0.00673358	0.0154536
RGU295354N0925461E	RGS293131N0926660E	20181114	Google Earth	Complex	Talus-connected	Geomorphological	Active	Extended	Mono-unit	0.0232001	0.153005	5287.67	5204	364.181	-1.1355	-2.43048	R2	E	18.7926	29.5425	92.4708	0.00101235	0.00236499
RGU295332N0925461E	RGS293131N0926660E	20181114	Google Earth	Complex	Talus-connected	Geomorphological	Active	Extended	Mono-unit	0.00895516	0.0511451	5275.71	5238	364.054	-1.1161	-2.42362	R2	N	20.8717	29.5431	92.4663	0.000305979	0.000634961
RGU295321N0925380E	RGS293131N0926660E	20181114	Google Earth	Complex	Talus-connected	Geomorphological	Active	Extended	Mono-unit	0.0127898	0.0972845	5295.14	5226	363.364	-1.08165	-2.39813	R2	N	17.0154	29.5432	92.4622	0.000708604	0.00137352
RGU295393N0925376E	RGS292743N0927884E	20181114	Google Earth	Simple	Talus-connected	Geomorphological	Active	Extended	Mono-unit	0.00638078	0.028384	5236	5205	360.807	-0.86118	-2.16654	R2	N	19.2056	29.5454	92.4572	0.000183911	0.000313236
RGU296094N0925189E	RGS292743N0927884E	20181114	Google Earth	Simple	Talus-connected	Geomorphological	Active	Extended	Mono-unit	0.00764806	0.0374083	5258.9	5229	361.697	-0.86118	-2.22773	R2	N	16.7063	29.5447	92.4535	0.000277369	0.000436259
RGU295732N0925015E	RGS292743N0927884E	20181114	Google Earth	Complex	Talus-connected	Geomorphological	Active	Extended	Mono-unit	0.0316853	0.29871	5156.03	5025	358.068	-0.605703	-1.97413	R2	NE	13.4971	29.5537	92.4558	0.00272793	0.00527816
RGU295757N0925068E	RGS292481N0928202E	20181114	Google Earth	Complex	Talus-connected	Geomorphological	Transitional	Extended	Mono-unit	0.0183381	0.144136	5200.11	5118	370.76	-1.01001	-2.84819	R2	N	15.4632	29.5756	92.4781	0.00115227	0.00220146
RGU295921N0924899E	RGS292481N0928202E	20181114	Google Earth	Complex	Talus-connected	Geomorphological	Transitional	Extended	Mono-unit	0.0173796	0.082191	5285.54	5198	368.77	-1.27456	-2.62392	R2	N	20.1793	29.5723	92.4719	0.000507847	0.00112195
RGU295892N0924927E	RGS292699N0928240E	20181114	Google Earth	Complex	Debris-mantled slope-connected	Geomorphological	Transitional	Extended	Mono-unit	0.01494	0.0506005	5254.39	5193	357.959	-0.8722	-1.76697	R2	NW	13.8393	29.5661	92.4636	0.000450891	0.000626856
RGU295869N0924888E	RGS292699N0928240E	20100310	Google Earth	Simple	Talus-connected	Geomorphological	Relict	Extended	Mono-unit	0.0121151	0.0918753	4924.28	4862	350.793	-0.334821	-0.792868	R2	E	18.0724	29.6292	92.4879
RGU295833N0924875E	RGS292699N0928240E	20100310	Google Earth	Simple	Talus-connected	Geomorphological	Relict	Extended	Mono-unit	0.0112752	0.0777337	4932.2	4897	355.104	-0.788564	-1.253	R2	NE	13.7131	29.619	92.4869
RGU295952N0924972E	RGS298129N0929493E	20100310	Google Earth	Complex	Debris-mantled slope-connected	Geomorphological	Relict	Extended	Mono-unit	0.0178751	0.166409	5021.9	4931	362.67	-1.1027	-1.96172	R2	E	20.793	29.6045	92.4885
RGU295948N0925011E	RGS296026N0924845E	20100310	Google Earth	Complex	Debris-mantled slope-connected	Geomorphological	Relict	Extended	Multi-unit	0.0217944	0.133042	5125.08	4970	364.295	-1.06443	-2.13293	R2	E	19.217	29.6015	92.4867
RGU295935N0925001E	RGS296026N0924845E	20100310	Google Earth	Complex	Debris-mantled slope-connected	Geomorphological	Relict	Extended	Multi-unit	0.0167282	0.16	5229.82	5162	365.068	-0.74923	-2.20996	R2	NE	11.9027	29.6047	92.4813
RGU295931N0925041E	RGS296026N0924845E	20100310	Google Earth	Complex	Debris-mantled slope-connected	Geomorphological	Relict	Extended	Multi-unit	0.0182049	0.0572133	5320.83	5273	374.569	-0.592036	-2.97343	R2	NE	11.781	29.6025	92.476
RGU295929N0925025E	RGS296026N0924845E	20100310	Google Earth	Complex	Debris-mantled slope-connected	Geomorphological	Relict	Extended	Multi-unit	0.0134422	0.0709061	5289.02	5247	370.302	-0.601	-2.56972	R2	SE	11.1729	29.604	92.4767
RGU295903N0925107E	RGS296026N0924845E	20100310	Google Earth	Complex	Debris-mantled slope-connected	Geomorphological	Active	Extended	Multi-unit	0.0122875	0.0594399	5345.88	5298	377.538	-0.566217	-3.26354	R2	NW	10.7734	29.6039	92.4734	0.000677775	0.00076046
RGU295907N0925076E	RGS298408N0930439E	20100310	Google Earth	Complex	Debris-mantled slope-connected	Geomorphological	Active	Extended	Mono-unit	0.00775781	0.0319393	5358.53	5316	367.685	-0.40214	-2.39612	R2	NE	20.5608	29.6152	92.4779	0.000193841	0.000360888
RGU295838N0924960E	RGS297463N0931006E	20100208	Google Earth	Complex	Debris-mantled slope-connected	Geomorphological	Active	Extended	Mono-unit	0.00970506	0.0555902	5328.78	5294	370.01	-0.40214	-2.5993	R2	NW	12.032	29.6168	92.4727	0.000568401	0.000701747
RGU295958N0925210E	RGS297463N0931006E	20100310	Google Earth	Complex	Talus-connected	Geomorphological	Active	Extended	Mono-unit	0.0082463	0.0259094	5359.68	5328	371.742	-0.40214	-2.74889	R2	NW	24.1487	29.6131	92.4731	0.000134988	0.000280757
RGU296022N0925109E	RGS297463N0931006E	20100310	Google Earth	Complex	Talus-connected	Geomorphological	Transitional	Extended	Mono-unit	0.0286023	0.230729	5233.22	5135	367.089	-0.022011	-2.30177	R2	W	18.1295	29.6226	92.4684	0.00158047	0.00387172
RGU296053N0925123E	RGS297430N0930873E	20100310	Google Earth	Simple	Talus-connected	Geomorphological	Transitional	Extended	Mono-unit	0.00810073	0.048578	5128.84	5082	362.651	0.20572	-1.89901	R2	W	26.537	29.6303	92.4657	0.000231753	0.000596911
RGU296064N0925117E	RGS296375N0924652E	20100310	Google Earth	Simple	Debris-mantled slope-connected	Geomorphological	Relict	Extended	Multi-unit	0.00464036	0.0140866	5046	5024	368.892	0.4748	-2.29719	R2	SW	20.8025	29.6384	92.4648
RGU296054N0925225E	RGS296375N0924652E	20100310	Google Earth	Simple	Debris-mantled slope-connected	Geomorphological	Active	Extended	Multi-unit	0.00928176	0.0215651	5159.83	5086	370.613	0.257466	-2.50404	R2	W	25.7853	29.6378	92.4667	0.000105667	0.00022526
RGU295999N0925218E	RGS296375N0924652E	20100310	Google Earth	Simple	Debris-mantled slope-connected	Geomorphological	Active	Extended	Multi-unit	0.00741747	0.0256297	5088.19	5039	370.613	0.233556	-2.50404	R2	W	22.9046	29.6374	92.4653	0.000140362	0.000277125
RGU296078N0925182E	RGS296375N0924652E	20100310	Google Earth	Complex	Debris-mantled slope-connected	Geomorphological	Active	Extended	Multi-unit	0.0113074	0.0251564	5205.74	5124	370.613	0.0977348	-2.50404	R2	W	20.711	29.6369	92.4678	0.000151616	0.000270994
RGU295661N0925186E	RGS296375N0924652E	20100310	Google Earth	Simple	Talus-connected	Geomorphological	Relict	Extended	Multi-unit	0.00497464	0.013594	5260.82	5232	370.613	-0.23162	-2.50404	R2	W	15.813	29.6369	92.4705
RGU295707N0925176E	RGS296375N0924652E	20100310	Google Earth	Complex	Talus-connected	Geomorphological	Active	Extended	Multi-unit	0.0167789	0.055654	5331.15	5282	369.726	-0.3774	-2.38945	R2	W	10.6408	29.6354	92.4733	0.000642423	0.000702714
RGU296096N0925018E	RGS296375N0924652E	20100310	Google Earth	Simple	Debris-mantled slope-connected	Geomorphological	Transitional	Extended	Multi-unit	0.00703369	0.0117797	5269.06	5237	370.613	-0.183027	-2.50404	R2	NW	12.855	29.6361	92.4698	0.000112852	0.000109029
RGU296065N0924902E	RGS296375N0924652E	20100310	Google Earth	Complex	Talus-connected	Geomorphological	Active	Extended	Multi-unit	0.00785626	0.0155329	5330.25	5320	363.11	-0.3774	-2.00388	R2	N	10.0116	29.6336	92.4744	0.000190441	0.000151944
RGU296042N0924913E	RGS296375N0924652E	20100310	Google Earth	Complex	Talus-connected	Geomorphological	Transitional	Extended	Multi-unit	0.0145345	0.0362784	5324.81	5291	367.508	-0.3774	-2.37849	R2	SW	9.33491	29.6354	92.4727	0.000476717	0.000420495
RGU296061N0924947E	RGS295571N0929648E	20100208	Google Earth	Simple	Talus-connected	Geomorphological	Active	Extended	Mono-unit	0.0182376	0.204747	5336.36	5246	348.987	0.219189	-0.50226	R2	NE	14.9599	29.6431	92.4805	0.00169057	0.00335462
RGU296041N0924930E	RGS296073N0930101E	20100208	Google Earth	Simple	Talus-connected	Geomorphological	Active	Extended	Mono-unit	0.00677072	0.0245653	5245.97	5220	350.806	0.20925	-0.657521	R2	N	12.4565	29.6437	92.483	0.000242745	0.000263372
RGU296124N0924900E	RGS296433N0930206E	20100209	Google Earth	Complex	Talus-connected	Geomorphological	Active	Extended	Mono-unit	0.0216844	0.183897	5275.59	5213	373.757	0.869163	-2.67913	R2	N	16.9489	29.6515	92.4717	0.00134458	0.00294899
RGU296138N0924888E	RGS296433N0930206E	20151028	Google Earth	Simple	Debris-mantled slope-connected	Geomorphological	Active	Extended	Mono-unit	0.0104012	0.0629369	5338.66	5295	369.81	0.52171	-2.39571	R2	SW	12.6712	29.6607	92.4741	0.000611552	0.000814458
RGU296303N0924904E	RGS297084N0929940E	20151028	Google Earth	Simple	Talus-connected	Geomorphological	Active	Extended	Mono-unit	0.00656884	0.0216958	5295.92	5258	376.46	-0.020968	-2.88505	R2	W	19.0992	29.6672	92.4824	0.000141329	0.000226899
RGU296045N0924885E	RGS297084N0929940E	20151028	Google Earth	Complex	Talus-connected	Geomorphological	Active	Extended	Mono-unit	0.00676289	0.0265398	5306.94	5270	376.46	-0.020968	-2.88505	R2	NW	15.29	29.666	92.4816	0.000214514	0.000288974
RGU296015N0924867E	RGS297084N0929940E	20151028	Google Earth	Complex	Talus-connected	Geomorphological	Active	Extended	Mono-unit	0.00564548	0.0227369	5194.85	5154	375.536	-0.26489	-2.83515	R2	NE	24.8828	29.6696	92.4754	0.000115178	0.000240027
RGU296047N0924813E	RGS296944N0929817E	20151028	Google Earth	Complex	Talus-connected	Geomorphological	Active	Extended	Mono-unit	0.00727558	0.019662	5311.64	5220	374.96	-0.26489	-2.7919	R2	NE	29.3912	29.6671	92.475	8.53937e-05	0.000201621
RGU296025N0924760E	RGS296944N0929817E	20151028	Google Earth	Complex	Debris-mantled slope-connected	Geomorphological	Active	Extended	Mono-unit	0.00713613	0.0304555	5324.78	5278	380.406	-0.78065	-3.19306	R2	NE	21.2404	29.6779	92.4831	0.000179182	0.000340864
RGU296039N0924734E	RGS296064N0929804E	20151028	Google Earth	Complex	Debris-mantled slope-connected	Geomorphological	Active	Extended	Mono-unit	0.0109736	0.0868795	5234.78	5188	370.406	-0.787468	-2.21942	R2	N	13.6689	29.6819	92.482	0.000783627	0.00119918
RGU296772N0924877E	RGS296127N0929766E	20100310	Google Earth	Complex	Debris-mantled slope-connected	Geomorphological	Relict	Extended	Mono-unit	0.00892995	0.0429974	5071.31	5014	361.103	-0.7971	-1.52539	R2	W	26.1066	29.6263	92.5194
RGU296807N0924949E	RGS296127N0929766E	20100310	Google Earth	Simple	Debris-mantled slope-connected	Geomorphological	Relict	Extended	Mono-unit	0.00721468	0.0212001	5077.59	5007	360.611	-0.7971	-1.5109	R2	W	25.9487	29.6233	92.52
RGU296143N0925263E	RGS294652N0930401E	20100310	Google Earth	Simple	Debris-mantled slope-connected	Geomorphological	Relict	Extended	Mono-unit	0.00498218	0.0116109	5128.15	5088	360.611	-0.727554	-1.5109	R2	SW	23.9651	29.6219	92.5215
RGU296121N0925247E	RGS294652N0930401E	20100310	Google Earth	Simple	Debris-mantled slope-connected	Geomorphological	Relict	Extended	Mono-unit	0.00738203	0.0244075	5103.59	5041	360.793	-0.7529	-1.54319	R2	W	26.6159	29.6169	92.5221
RGU296807N0925459E	RGS294782N0930245E	20100310	Google Earth	Complex	Talus-connected	Geomorphological	Transitional	Extended	Mono-unit	0.0190399	0.131404	5245.64	5066	367.444	-1.0112	-2.18689	R2	E	25.7878	29.6154	92.5192	0.000643806	0.0019702
RGU296827N0925450E	RGS294782N0930245E	20100310	Google Earth	Complex	Talus-connected	Geomorphological	Active	Extended	Mono-unit	0.0136273	0.0753609	5339.39	5307	367.76	-0.662917	-2.27539	R2	NE	18.5531	29.6216	92.5049	0.00050483	0.00101102
RGU296734N0925525E	RGS294869N0930353E	20100310	Google Earth	Complex	Talus-connected	Geomorphological	Active	Extended	Mono-unit	0.0152425	0.0534544	5291.03	5267	367.141	-0.58183	-2.18491	R2	NE	15.6284	29.6243	92.5027	0.000422928	0.000669519
RGU297314N0925282E	RGS294869N0930353E	20100310	Google Earth	Complex	Talus-connected	Geomorphological	Active	Extended	Mono-unit	0.0102652	0.0624891	5093.04	5045	365.401	-0.234794	-1.97436	R2	NE	27.3271	29.637	92.5019	0.000290136	0.000807509
RGU298099N0925405E	RGS296667N0925107E	20151028	Google Earth	Complex	Debris-mantled slope-connected	Geomorphological	Active	Extended	Multi-unit	0.0210028	0.183715	5289.82	5206	369.524	-0.413646	-2.07333	R2	SE	10.2545	29.6677	92.5103	0.00219962	0.00294548
RGU298167N0925524E	RGS296667N0925107E	20151028	Google Earth	Complex	Debris-mantled slope-connected	Geomorphological	Active	Extended	Multi-unit	0.010874	0.0594774	5383.87	5340	373.9	-0.41528	-2.49939	R2	E	15.0655	29.6725	92.5061	0.000487734	0.000761035
RGU298153N0925540E	RGS296091N0930598E	20151028	Google Earth	Complex	Debris-mantled slope-connected	Geomorphological	Transitional	Extended	Mono-unit	0.0521099	0.499627	5225.55	5111	372.911	-0.609396	-2.32834	R2	NE	13.3789	29.6736	92.5182	0.00460235	0.00978494
RGU298157N0925534E	RGS296798N0925066E	20151028	Google Earth	Complex	Debris-mantled slope-connected	Geomorphological	Active	Extended	Multi-unit	0.0231638	0.232576	5328.22	5276	376.241	-1.04121	-2.72249	R2	NE	11.0093	29.6799	92.5062	0.00259584	0.00390895
RGU298155N0925520E	RGS296798N0925066E	20151028	Google Earth	Simple	Debris-mantled slope-connected	Geomorphological	Active	Extended	Multi-unit	0.00855938	0.0491787	5404.39	5350	372.914	-0.865423	-2.4079	R2	NE	24.3835	29.6782	92.5009	0.000253904	0.00060578
RGU298138N0925538E	RGS296798N0925066E	20151028	Google Earth	Simple	Debris-mantled slope-connected	Geomorphological	Active	Extended	Multi-unit	0.0109127	0.0819126	5405.17	5356	382.676	-0.870298	-3.24306	R2	S	18.4669	29.6809	92.5001	0.00055119	0.00111739
RGU298113N0925536E	RGS296280N0930294E	20151028	Google Earth	Complex	Debris-mantled slope-connected	Geomorphological	Active	Extended	Mono-unit	0.0152197	0.107345	5332.3	5290	378.454	-0.896803	-2.80318	R2	E	14.128	29.6831	92.5091	0.000937371	0.00154569
RGU298099N0925532E	RGS296280N0930294E	20151028	Google Earth	Complex	Talus-connected	Geomorphological	Active	Extended	Mono-unit	0.0255237	0.280095	5251.8	5176	376.333	-0.843608	-2.6182	R2	S	13.3541	29.681	92.5149	0.00258481	0.00488595
RGU297042N0925521E	RGS296570N0930336E	20151028	Google Earth	Simple	Debris-mantled slope-connected	Geomorphological	Active	Extended	Mono-unit	0.00858012	0.0431703	5363.46	5335	378.454	-0.84266	-2.80318	R2	SW	13.1142	29.6861	92.5104	0.000405546	0.000518089
RGU297274N0925489E	RGS296570N0930336E	20151028	Google Earth	Simple	Talus-connected	Geomorphological	Active	Extended	Mono-unit	0.0039075	0.0113427	5194.42	5177	369.185	-0.69718	-1.94433	R2	SW	20.015	29.6781	92.5203	7.06364e-05	0.000104194
RGU297097N0925415E	RGS296750N0925250E	20151028	Google Earth	Complex	Debris-mantled slope-connected	Geomorphological	Transitional	Extended	Multi-unit	0.0119396	0.0662301	5184.03	5151	369.185	-0.444324	-1.94433	R2	SW	15.5799	29.6739	92.5235	0.0005256	0.000865862
RGU296920N0925619E	RGS296750N0925250E	20151028	Google Earth	Complex	Talus-connected	Geomorphological	Transitional	Extended	Multi-unit	0.0236047	0.266648	5272.05	5193	371.06	-0.694211	-2.08412	R2	SW	11.2762	29.6756	92.5253	0.00290659	0.00460585
RGU296895N0925616E	RGS296750N0925250E	20151028	Google Earth	Simple	Talus-connected	Geomorphological	Active	Extended	Multi-unit	0.00706434	0.0317334	5357.21	5336	372.27	-1.03605	-2.17892	R2	E	15.2452	29.6829	92.5243	0.000257228	0.000358098
RGU296871N0925608E	RGS296918N0930299E	20151028	Google Earth	Complex	Talus-connected	Geomorphological	Active	Extended	Mono-unit	0.01468	0.103381	5280.94	5230	378.192	-0.914304	-2.79841	R2	NW	14.342	29.6904	92.502	0.000889557	0.00147744
RGU296921N0925498E	RGS296918N0930299E	20151028	Google Earth	Complex	Debris-mantled slope-connected	Geomorphological	Active	Extended	Mono-unit	0.00726137	0.0340331	5238.17	5208	377.951	-1.0892	-2.78972	R2	N	20.4551	29.6899	92.4953	0.000207569	0.000389461
RGU296907N0925841E	RGS296918N0930299E	20151028	Google Earth	Complex	Talus-connected	Geomorphological	Active	Extended	Mono-unit	0.00842514	0.0396506	5198.98	5175	371.728	-0.769538	-2.15244	R2	NE	20.8896	29.701	92.4887	0.000237019	0.000467823
RGU296896N0925751E	RGS296822N0930289E	20151028	Google Earth	Complex	Debris-mantled slope-connected	Geomorphological	Active	Extended	Mono-unit	0.0138859	0.0694892	5389.87	5347	377.505	-1.0984	-2.53628	R2	W	22.7007	29.7181	92.4982	0.000383795	0.000917241
RGU296679N0925719E	RGS296822N0930289E	20151028	Google Earth	Complex	Talus-connected	Geomorphological	Active	Extended	Mono-unit	0.014049	0.0674155	5266.4	5252	378.654	-1.20282	-2.77107	R2	NW	7.89033	29.7067	92.5023	0.00104674	0.000884493
RGU297666N0925293E	RGS296822N0930289E	20151028	Google Earth	Complex	Talus-connected	Geomorphological	Active	Extended	Mono-unit	0.00943195	0.0484201	5332.47	5262	378.116	-0.71972	-2.78729	R2	SW	20.7879	29.6951	92.502	0.000290793	0.000594585
RGU297647N0925283E	RGS295423N0930458E	20151028	Google Earth	Complex	Glacier forefield-connected	Geomorphological	Relict	Extended	Mono-unit	0.0256329	0.375543	5209.33	5107	376.91	-0.883135	-2.57129	R2	SW	13.5224	29.7048	92.4938
RGU297624N0925231E	RGS295423N0930458E	20181031	Google Earth	Complex	Talus-connected	Geomorphological	Relict	Extended	Mono-unit	0.0332422	0.340419	5228.73	5162	379.807	-0.985474	-2.74263	R2	N	12.0621	29.7236	92.5063
RGU297635N0925300E	RGS295468N0930291E	20181031	Google Earth	Complex	Talus-connected	Geomorphological	Relict	Extended	Mono-unit	0.0117626	0.0427208	5268.1	5254	385.384	-0.989077	-3.19171	R2	NE	9.60335	29.7191	92.5115
RGU297772N0925339E	RGS295468N0930291E	20181031	Google Earth	Complex	Glacier forefield-connected	Geomorphological	Relict	Extended	Mono-unit	0.020645	0.12898	5281.46	5246	384.569	-0.695574	-3.0961	R2	NW	10.5972	29.7203	92.5136
RGU297780N0925363E	RGS294939N0930818E	20181031	Google Earth	Complex	Talus-connected	Geomorphological	Relict	Extended	Mono-unit	0.00616877	0.0200574	5321.96	5306	383.115	-0.70721	-2.9208	R2	E	13.2851	29.7245	92.524
RGU297710N0925451E	RGS294939N0930818E	20181031	Google Earth	Complex	Glacier forefield-connected	Geomorphological	Relict	Extended	Mono-unit	0.0165863	0.164186	5246.8	5180	383.499	-0.0472748	-2.85862	R2	N	11.3053	29.7378	92.5191
RGU297273N0925354E	RGS296039N0930706E	20181031	Google Earth	Complex	Talus-connected	Geomorphological	Transitional	Extended	Mono-unit	0.0110076	0.0686222	5289.78	5245	383.357	-0.473634	-2.93971	R2	N	16.0581	29.7385	92.5083	0.000528775	0.000903524
RGU297892N0925592E	RGS296039N0930706E	20181031	Google Earth	Complex	Debris-mantled slope-connected	Geomorphological	Transitional	Extended	Mono-unit	0.0237666	0.302741	5244.08	5158	382.723	-0.258315	-2.83433	R2	NE	10.6797	29.7427	92.5138	0.003482	0.00536375
RGU297971N0925502E	RGS296059N0931016E	20181031	Google Earth	Simple	Debris-mantled slope-connected	Geomorphological	Relict	Extended	Mono-unit	0.011008	0.0378905	5102.33	5046	376.878	-0.303526	-2.19793	R2	NE	13.943	29.7483	92.5183
RGU298366N0925247E	RGS296059N0931016E	20181031	Google Earth	Complex	Debris-mantled slope-connected	Geomorphological	Transitional	Extended	Mono-unit	0.023842	0.210403	5217.44	5098	377.384	-0.704905	-2.23842	R2	E	11.7807	29.7493	92.5148	0.00219656	0.00346613
RGU298273N0925494E	RGS296059N0931016E	20181031	Google Earth	Complex	Talus-connected	Geomorphological	Transitional	Extended	Mono-unit	0.00865963	0.0486324	5221.24	5191	369.312	-0.88154	-1.66662	R2	N	13.8799	29.7394	92.4976	0.000432108	0.000597713
RGU298207N0925634E	RGS296569N0930666E	20181031	Google Earth	Simple	Talus-connected	Geomorphological	Transitional	Extended	Mono-unit	0.00446275	0.0123214	5273.69	5246	369.312	-1.0045	-1.66662	R2	N	26.3631	29.7371	92.4986	5.91421e-05	0.000115073
RGU298144N0925288E	RGS296569N0930666E	20181031	Google Earth	Complex	Talus-connected	Geomorphological	Transitional	Extended	Mono-unit	0.0140267	0.0798488	5150.79	5109	366.22	-0.864836	-1.43162	R2	NW	13.2548	29.7405	92.491	0.000742294	0.00108369
RGU295995N0925706E	RGS296589N0930794E	20181031	Google Earth	Simple	Debris-mantled slope-connected	Geomorphological	Relict	Extended	Mono-unit	0.00520641	0.0151651	5099.31	5070	384.901	-1.0252	-3.00086	R2	W	22.7872	29.7483	92.4966
RGU295936N0925666E	RGS296589N0930794E	20181031	Google Earth	Simple	Debris-mantled slope-connected	Geomorphological	Relict	Extended	Mono-unit	0.00810334	0.0337106	5072.12	5030	380.702	-0.946612	-2.51736	R2	SW	17.9805	29.7644	92.4979
RGU295766N0925633E	RGS296539N0930814E	20181031	Google Earth	Simple	Debris-mantled slope-connected	Geomorphological	Relict	Extended	Mono-unit	0.0131341	0.0780118	5223.24	5133	380.702	-0.720487	-2.51459	R2	SW	17.826	29.7654	92.5013
RGU295723N0925536E	RGS296539N0930814E	20181031	Google Earth	Complex	Debris-mantled slope-connected	Geomorphological	Transitional	Extended	Mono-unit	0.0105215	0.0410996	5306.37	5278	381.962	-1.0369	-2.56692	R2	SE	15.5893	29.7511	92.506	0.000325974	0.000488414
RGU295529N0925337E	RGS296539N0930814E	20181031	Google Earth	Complex	Talus-connected	Geomorphological	Active	Extended	Mono-unit	0.0129269	0.069239	5095.16	5045	372.541	-0.65496	-1.77431	R2	NW	17.5118	29.777	92.4908	0.000490459	0.000913279
RGU295559N0925201E	RGS296549N0930862E	20181031	Google Earth	Complex	Talus-connected	Geomorphological	Active	Extended	Mono-unit	0.00666346	0.0190325	5159.57	5130	374.722	-0.64887	-1.93651	R2	S	15.5497	29.7783	92.4944	0.000151327	0.000193899
RGU295574N0925463E	RGS297829N0925098E	20181031	Google Earth	Complex	Debris-mantled slope-connected	Geomorphological	Active	Extended	Multi-unit	0.016063	0.152515	5079.84	5037	373.78	-0.554854	-1.72143	R2	N	14.4317	29.783	92.5103	0.00130435	0.0023559
RGU295482N0925531E	RGS297829N0925098E	20181031	Google Earth	Complex	Debris-mantled slope-connected	Geomorphological	Active	Extended	Multi-unit	0.0177146	0.113875	5129.93	5072	377.836	-0.62171	-2.13687	R2	W	17.286	29.7795	92.505	0.000816846	0.00165919
RGU295407N0925518E	RGS297829N0925098E	20181031	Google Earth	Complex	Debris-mantled slope-connected	Geomorphological	Active	Extended	Multi-unit	0.0278119	0.335977	5171.29	5032	377.143	-0.495545	-2.03159	R2	NE	15.0484	29.7823	92.5151	0.00275818	0.0060779
RGU295281N0925372E	RGS297829N0925098E	20181031	Google Earth	Complex	Debris-mantled slope-connected	Geomorphological	Active	Extended	Multi-unit	0.0202903	0.175152	5206.14	5120	378.799	-0.66432	-2.29112	R2	NW	17.5628	29.7741	92.5028	0.00123721	0.00278151
RGU295263N0925403E	RGS297829N0925098E	20181031	Google Earth	Complex	Debris-mantled slope-connected	Geomorphological	Active	Extended	Multi-unit	0.0111876	0.0606507	5300.21	5244	383.911	-0.632038	-2.7086	R2	NW	16.4382	29.7753	92.5077	0.000456831	0.000779086
RGU295446N0925557E	RGS296605N0930992E	20181031	Google Earth	Complex	Debris-mantled slope-connected	Geomorphological	Transitional	Extended	Mono-unit	0.0207468	0.193801	4996.36	4946	364.743	-0.64318	-0.945106	R2	W	17.0674	29.7857	92.4892	0.00140744	0.00314057
RGU295952N0925596E	RGS296605N0930992E	20181031	Google Earth	Complex	Talus-connected	Geomorphological	Transitional	Extended	Mono-unit	0.0058898	0.0257284	5150.87	5118	378.467	-0.74069	-2.2185	R2	E	17.469	29.787	92.4979	0.000182681	0.000278405
RGU295324N0925680E	RGS296907N0930891E	20181031	Google Earth	Complex	Talus-connected	Geomorphological	Transitional	Extended	Mono-unit	0.010967	0.0644482	5110.66	5076	374.198	-0.801064	-1.77407	R2	NW	11.0197	29.7907	92.4968	0.000718657	0.000837984
RGU295291N0925628E	RGS296907N0930891E	20181031	Google Earth	Complex	Debris-mantled slope-connected	Geomorphological	Active	Extended	Mono-unit	0.0117241	0.0666084	5215.99	5154	384.01	-0.947448	-2.57618	R2	SW	11.9216	29.7972	92.5108	0.000687279	0.000871802
RGU295314N0925602E	RGS296907N0930891E	20181031	Google Earth	Complex	Talus-connected	Geomorphological	Transitional	Extended	Mono-unit	0.0312208	0.412716	5156.12	5081	380.783	-0.836777	-2.32566	R2	N	11.6397	29.7991	92.503	0.00436014	0.00777973
RGU295265N0925697E	RGS296907N0930891E	20181031	Google Earth	Simple	Debris-mantled slope-connected	Geomorphological	Transitional	Extended	Mono-unit	0.00545823	0.0187059	5221.05	5199	383.93	-0.16921	-2.51732	R2	N	14.3897	29.8011	92.5094	0.000160436	0.000189914
RGU295233N0925539E	RGS296980N0930953E	20181031	Google Earth	Simple	Talus-connected	Geomorphological	Transitional	Extended	Mono-unit	0.0102401	0.044092	5268.64	5236	383.679	-0.939279	-2.47545	R2	N	14.9699	29.7991	92.5193	0.000363823	0.000531391
RGU295275N0925500E	RGS296980N0930953E	20181031	Google Earth	Complex	Debris-mantled slope-connected	Geomorphological	Relict	Extended	Mono-unit	0.0239879	0.11747	5037.09	4918	373.54	0.158877	-1.40044	R2	N	15.3582	29.8159	92.5197
RGU295092N0925690E	RGS297086N0930804E	20181031	Google Earth	Complex	Debris-mantled slope-connected	Geomorphological	Transitional	Extended	Mono-unit	0.0199139	0.213687	5358.59	5275	385.839	-0.939449	-3.27922	R2	SE	15.5462	29.706	92.5216	0.0016994	0.00353116
RGU294898N0925425E	RGS297086N0930804E	20181031	Google Earth	Complex	Glacier forefield-connected	Geomorphological	Transitional	Extended	Mono-unit	0.00906161	0.0581021	5106.29	5090	383.101	-0.66963	-2.64707	R2	N	7.67552	29.7697	92.5199	0.000927218	0.000739967
RGU294842N0925454E	RGS295100N0930770E	20181031	Google Earth	Complex	Debris-mantled slope-connected	Geomorphological	Transitional	Extended	Mono-unit	0.0142502	0.0796655	5268.52	5215	381.857	-1.0511	-2.57783	R2	NE	16.664	29.7606	92.509	0.000592149	0.0010807
RGU294851N0925439E	RGS295100N0930770E	20181031	Google Earth	Complex	Talus-connected	Geomorphological	Transitional	Extended	Mono-unit	0.00848747	0.0354873	5189.71	5171	379.971	-1.03414	-2.36124	R2	N	14.1825	29.7637	92.515	0.000308719	0.000409515
RGU294910N0925390E	RGS298328N0925182E	20151028	Google Earth	Complex	Debris-mantled slope-connected	Geomorphological	Relict	Extended	Multi-unit	0.0185866	0.116423	5165.86	5078	385.54	-0.554986	-2.46053	R2	NW	14.2487	29.8338	92.5181
RGU294919N0925308E	RGS298328N0925182E	20151028	Google Earth	Complex	Debris-mantled slope-connected	Geomorphological	Transitional	Extended	Multi-unit	0.00705678	0.0353634	5293.48	5249	387.591	-0.573109	-2.66406	R2	NE	25.1565	29.829	92.5209	0.000177315	0.000407801
RGU294691N0925370E	RGS295299N0931128E	20151028	Google Earth	Complex	Debris-mantled slope-connected	Geomorphological	Transitional	Extended	Mono-unit	0.0277127	0.246585	5115.7	4975	380.511	-0.60091	-2.05164	R2	NW	16.6006	29.8312	92.5125	0.00183965	0.00419316
RGU294724N0925553E	RGS295393N0931237E	20181114	Google Earth	Complex	Talus-connected	Geomorphological	Transitional	Extended	Mono-unit	0.00957043	0.0687727	4841.55	4806	344.755	-0.850568	-0.858772	R2	N	16.92	29.4847	92.5241	0.00050367	0.000905903
RGU295928N0925302E	RGS295393N0931237E	20181114	Google Earth	Simple	Talus-connected	Geomorphological	Transitional	Extended	Mono-unit	0.0121033	0.0842012	4845.85	4801	344.472	-0.219637	-0.837995	R2	W	17.8109	29.4826	92.5222	0.000586743	0.00115495
RGU295966N0924756E	RGS295399N0931144E	20181114	Google Earth	Complex	Talus-connected	Geomorphological	Transitional	Extended	Mono-unit	0.0448495	0.553624	4981.27	4742	346.313	-0.549969	-0.992837	R2	NW	18.1267	29.4786	92.5212	0.00379284	0.0110673
RGU295734N0925280E	RGS295399N0931144E	20181031	Google Earth	Simple	Debris-mantled slope-connected	Geomorphological	Active	Extended	Mono-unit	0.00406779	0.0104092	5147.85	5140	373.066	-0.17689	-1.45115	R2	NE	9.43343	29.8315	92.4878	0.000135366	9.39903e-05
RGU295790N0925408E	RGS295399N0931144E	20181114	Google Earth	Complex	Talus-connected	Geomorphological	Active	Extended	Mono-unit	0.0145759	0.0847355	5228.2	5184	357.05	0.00276087	-2.08913	R2	SW	25.4901	29.4752	92.4909	0.000419677	0.00116375
RGU295799N0925464E	RGS295399N0931144E	20181114	Google Earth	Complex	Talus-connected	Geomorphological	Active	Extended	Mono-unit	0.0260389	0.209428	5162.71	4971	342.821	-0.0311906	-0.827212	R2	E	17.5477	29.4694	92.5067	0.00148056	0.00344687
RGU295794N0925302E	RGS294787N0924993E	20181114	Google Earth	Complex	Talus-connected	Geomorphological	Active	Extended	Multi-unit	0.0301516	0.217911	5255.46	5177	361.734	0.143896	-2.4068	R2	NE	14.517	29.4814	92.4967	0.00185292	0.00361508
RGU295850N0925417E	RGS294787N0924993E	20181114	Google Earth	Complex	Talus-connected	Geomorphological	Active	Extended	Multi-unit	0.00457438	0.016047	5250.88	5227	361.85	0.19415	-2.43236	R2	NE	23.0483	29.4771	92.4974	8.73637e-05	0.000158
RGU295810N0925404E	RGS294787N0924993E	20181114	Google Earth	Complex	Talus-connected	Geomorphological	Active	Extended	Multi-unit	0.0276699	0.226077	5127.66	5034	360.159	-0.203812	-2.25934	R2	NE	11.6451	29.4763	92.5082	0.00238729	0.00377824
RGU295855N0925392E	RGS295863N0931175E	20181114	Google Earth	Complex	Talus-connected	Geomorphological	Active	Extended	Mono-unit	0.0597333	0.559384	5259.98	5099	360.338	-0.0559097	-2.23927	R2	NE	14.0933	29.4919	92.4924	0.00489649	0.0112056
RGU295833N0925405E	RGS295863N0931175E	20181114	Google Earth	Complex	Talus-connected	Geomorphological	Relict	Extended	Mono-unit	0.0224353	0.242033	5060.43	4971	356.158	-0.0607501	-1.8696	R2	NE	19.7979	29.488	92.5125
RGU295824N0925427E	RGS295863N0931175E	20181114	Google Earth	Complex	Talus-connected	Geomorphological	Active	Extended	Mono-unit	0.00811298	0.0412132	5376.02	5340	358.532	-0.272825	-2.06448	R2	E	21.8425	29.5018	92.4888	0.000236104	0.000490034
RGU295815N0925441E	RGS295777N0931045E	20181114	Google Earth	Complex	Talus-connected	Geomorphological	Active	Extended	Mono-unit	0.0275908	0.200496	5308.1	5259	358.566	-0.897444	-2.0227	R2	S	13.7535	29.5287	92.4815	0.00179751	0.00327123
RGU295954N0925503E	RGS295777N0931045E	20181114	Google Earth	Complex	Talus-connected	Geomorphological	Active	Extended	Mono-unit	0.0128221	0.0853548	5339.23	5302	360.639	-0.14725	-2.25587	R2	E	18.0027	29.4995	92.4908	0.000588653	0.00117397
RGU295945N0925421E	RGS296350N0931612E	20181114	Google Earth	Complex	Talus-connected	Geomorphological	Active	Extended	Mono-unit	0.00727476	0.0256009	5399.83	5359	358.532	-0.7469	-2.06448	R2	SE	16.1463	29.5062	92.4943	0.00019622	0.000276751
RGU296014N0925355E	RGS296350N0931612E	20181114	Google Earth	Complex	Talus-connected	Geomorphological	Transitional	Extended	Mono-unit	0.0088836	0.0269282	5353.23	5330	390.382	-1.0639	-3.68929	R2	W	15.9426	29.711	92.5121	0.000208961	0.000294057
RGU296083N0925568E	RGS296350N0931612E	20181114	Google Earth	Simple	Talus-connected	Geomorphological	Transitional	Extended	Mono-unit	0.0153104	0.103531	5329.82	5250	357.85	-0.530351	-1.98957	R2	S	13.3265	29.5008	92.4956	0.000957363	0.00148002
RGU296132N0925567E	RGS296350N0931612E	20181114	Google Earth	Complex	Talus-connected	Geomorphological	Relict	Extended	Mono-unit	0.0110904	0.054201	5254.73	5225	359.526	-0.32102	-2.11203	R2	S	17.8383	29.4986	92.4983
RGU296125N0925588E	RGS295934N0931466E	20181114	Google Earth	Simple	Talus-connected	Geomorphological	Transitional	Extended	Mono-unit	0.00922842	0.0481659	5372.32	5342	362.121	-0.7469	-2.27944	R2	E	16.0188	29.5104	92.4981	0.000372033	0.00059084
RGU296234N0925611E	RGS295048N0925034E	20181114	Google Earth	Complex	Talus-connected	Geomorphological	Active	Extended	Multi-unit	0.0125239	0.0796606	5236.32	5205	357.674	-0.154601	-1.94828	R2	E	19.1558	29.5012	92.5038	0.000517443	0.00108063
RGU296139N0925497E	RGS295048N0925034E	20181114	Google Earth	Complex	Talus-connected	Geomorphological	Active	Extended	Multi-unit	0.0122438	0.102519	5251.97	5199	357.132	-0.827343	-1.89162	R2	NE	16.9618	29.5043	92.503	0.000749019	0.00146267
RGU296247N0925543E	RGS295048N0925034E	20181114	Google Earth	Complex	Talus-connected	Geomorphological	Active	Extended	Multi-unit	0.0108746	0.0465294	5270.8	5219	357.132	-0.809662	-1.89162	R2	E	16.3264	29.5062	92.5031	0.000352799	0.000566833
RGU295606N0924708E	RGS295048N0925034E	20181114	Google Earth	Complex	Glacier forefield-connected	Geomorphological	Active	Extended	Multi-unit	0.0179338	0.0649516	5273.27	5232	358.19	-0.826947	-1.96621	R2	NE	15.3572	29.5072	92.5032	0.000522743	0.000845844
RGU296212N0925391E	RGS296512N0931891E	20181114	Google Earth	Complex	Talus-connected	Geomorphological	Active	Extended	Mono-unit	0.0242013	0.196796	5245.18	5197	359.193	-0.509038	-2.06615	R2	W	17.9677	29.5019	92.5071	0.00135977	0.00319891
RGU296310N0925436E	RGS296369N0932034E	20181114	Google Earth	Complex	Talus-connected	Geomorphological	Active	Extended	Mono-unit	0.00445299	0.0152585	5280.89	5258	364.038	-0.36542	-2.35911	R2	S	16.3329	29.5061	92.5177	0.000115649	0.000148729
RGU296147N0925316E	RGS296369N0932034E	20181114	Google Earth	Complex	Talus-connected	Geomorphological	Active	Extended	Mono-unit	0.0201986	0.163016	5278.39	5195	356.097	0.093666	-1.73182	R2	E	14.8095	29.497	92.5186	0.00135936	0.00255187
RGU296717N0925745E	RGS295034N0925196E	20181114	Google Earth	Complex	Talus-connected	Geomorphological	Active	Extended	Multi-unit	0.0163192	0.150393	5310.25	5236	363.635	-0.36542	-2.37035	R2	NE	16.2548	29.5043	92.5168	0.00114521	0.00231663
RGU298171N0925813E	RGS295034N0925196E	20181114	Google Earth	Complex	Talus-connected	Geomorphological	Active	Extended	Multi-unit	0.010318	0.0612859	5250.41	5215	364.05	-0.20339	-2.35788	R2	NE	13.8519	29.5033	92.5193	0.000545618	0.000788887
RGU298170N0925803E	RGS295034N0925196E	20181114	Google Earth	Complex	Talus-connected	Geomorphological	Active	Extended	Multi-unit	0.0134501	0.0702402	5204.24	5164	364.066	-0.310218	-2.35748	R2	E	12.9213	29.5013	92.5228	0.000669524	0.000929149
RGU298161N0925799E	RGS295796N0932721E	20181114	Google Earth	Complex	Talus-connected	Geomorphological	Active	Extended	Mono-unit	0.0294409	0.310772	5290.81	5222	369.651	-0.960941	-2.97681	R2	NW	13.578	29.5119	92.4868	0.00282148	0.00553495
RGU298165N0925794E	RGS295796N0932721E	20181114	Google Earth	Complex	Talus-connected	Geomorphological	Active	Extended	Mono-unit	0.0187808	0.114484	5352.88	5279	367.973	-0.7685	-2.76802	R2	SW	22.9197	29.5175	92.4938	0.000626581	0.00166984
RGU298160N0925776E	RGS291536N0929737E	20181114	Google Earth	Complex	Debris-mantled slope-connected	Geomorphological	Active	Extended	Mono-unit	0.00812288	0.0424626	5365.65	5329	371.498	-0.56682	-3.03118	R2	SW	19.8782	29.5243	92.4978	0.00026618	0.000507914
RGU298167N0925783E	RGS291536N0929737E	20181114	Google Earth	Simple	Talus-connected	Geomorphological	Active	Extended	Mono-unit	0.0110159	0.0551514	5304.1	5264	367.672	-1.0278	-2.63576	R2	NW	18.1879	29.536	92.4934	0.00037661	0.000695105
RGU298165N0925757E	RGS295188N0925054E	20181114	Google Earth	Simple	Talus-connected	Geomorphological	Active	Extended	Multi-unit	0.00762692	0.0418657	5316.98	5285	371.498	-0.88276	-3.03118	R2	NE	18.214	29.5188	92.5034	0.00028549	0.000499359
RGU298274N0925782E	RGS295188N0925054E	20181114	Google Earth	Simple	Debris-mantled slope-connected	Geomorphological	Active	Extended	Multi-unit	0.00848611	0.0492762	5280.15	5254	369.605	-0.88276	-2.86971	R2	NE	11.0394	29.5185	92.5061	0.000548506	0.000607222
RGU298229N0925796E	RGS295144N0925123E	20181114	Google Earth	Complex	Debris-mantled slope-connected	Geomorphological	Active	Extended	Multi-unit	0.0202787	0.138551	5275.43	5227	369.654	-0.833285	-2.87362	R2	NE	14.9824	29.5153	92.5105	0.00114231	0.00209948
RGU298381N0925755E	RGS295144N0925123E	20181114	Google Earth	Complex	Debris-mantled slope-connected	Geomorphological	Transitional	Extended	Multi-unit	0.0478675	0.59199	5150.99	4970	359.944	-0.301178	-1.97553	R2	NE	19.192	29.5128	92.5285	0.00383836	0.0119939
RGU297562N0925798E	RGS295144N0925123E	20181114	Google Earth	Complex	Debris-mantled slope-connected	Geomorphological	Transitional	Extended	Multi-unit	0.00496817	0.0187942	5283.09	5264	370.986	-0.54934	-2.96308	R2	N	17.5621	29.5128	92.5134	0.00013276	0.000190991
RGU297555N0925863E	RGS292134N0930278E	20181114	Google Earth	Complex	Talus-connected	Geomorphological	Transitional	Extended	Mono-unit	0.020933	0.136193	5355.98	5306	367.998	-1.30127	-2.54472	R2	NW	13.2064	29.5284	92.5312	0.00127063	0.00205668
RGU297603N0925828E	RGS292193N0931834E	20181114	Google Earth	Complex	Debris-mantled slope-connected	Geomorphological	Active	Extended	Mono-unit	0.0226857	0.135216	5383.09	5310	369.719	-1.35104	-2.70749	R2	SE	22.8452	29.5381	92.5266	0.000742338	0.002039
RGU296021N0925732E	RGS292193N0931834E	20181114	Google Earth	Complex	Talus-connected	Geomorphological	Transitional	Extended	Mono-unit	0.00706478	0.0336425	5386.05	5351	372.616	-1.52942	-2.87421	R2	W	25.8434	29.5374	92.5456	0.0001645	0.000384104
RGU295812N0925759E	RGS292330N0932173E	20181114	Google Earth	Complex	Talus-connected	Geomorphological	Transitional	Extended	Mono-unit	0.00551987	0.0229453	5362.38	5336	372.562	-1.5568	-2.88567	R2	SW	20.3115	29.5354	92.5461	0.000140891	0.000242669
RGU295791N0925783E	RGS292330N0932173E	20181114	Google Earth	Complex	Talus-connected	Geomorphological	Relict	Extended	Mono-unit	0.00661384	0.0190089	5337	5325	372.523	-1.5568	-2.89408	R2	W	17.3908	29.5332	92.5461
RGU295755N0925681E	RGS292330N0932173E	20181114	Google Earth	Complex	Debris-mantled slope-connected	Geomorphological	Transitional	Extended	Mono-unit	0.0088999	0.0271914	5378.06	5350	371.577	-1.5995	-2.85493	R2	NE	20.3723	29.5321	92.538	0.000166486	0.000297509
RGU296108N0925810E	RGS292465N0932340E	20181114	Google Earth	Simple	Talus-connected	Geomorphological	Transitional	Extended	Mono-unit	0.00574203	0.0168764	5439.17	5423	372.243	-0.939819	-2.86687	R2	SE	21.4441	29.5393	92.5376	9.83915e-05	0.000167849
RGU295471N0925900E	RGS292465N0932340E	20100310	Google Earth	Complex	Debris-mantled slope-connected	Geomorphological	Relict	Extended	Mono-unit	0.0056326	0.0195588	5202.62	5150	361.837	-0.58038	-1.66158	R2	E	31.023	29.6094	92.5189
RGU295326N0925844E	RGS291117N0932685E	20181114	Google Earth	Complex	Glacier forefield-connected	Geomorphological	Active	Extended	Mono-unit	0.0163296	0.101334	5311.62	5266	359.137	-0.680119	-1.75915	R2	SW	13.7785	29.5732	92.5015	0.000906871	0.0014424
RGU295329N0925823E	RGS291117N0932685E	20181114	Google Earth	Complex	Talus-connected	Geomorphological	Active	Extended	Mono-unit	0.0154779	0.0645785	5359.21	5326	381.669	-0.891471	-3.70977	R2	NW	13.3357	29.5757	92.5068	0.000596761	0.000840017
RGU295335N0925799E	RGS297911N0933516E	20181114	Google Earth	Complex	Talus-connected	Geomorphological	Relict	Extended	Mono-unit	0.0178609	0.201027	5023.07	4922	371.163	-1.2424	-2.70026	R2	W	20.3648	29.5921	92.4899
RGU295300N0925724E	RGS297911N0933516E	20181114	Google Earth	Simple	Talus-connected	Geomorphological	Transitional	Extended	Mono-unit	0.0128488	0.060905	5165.12	5023	353.503	-1.20542	-1.2077	R2	W	27.3472	29.5892	92.4927	0.000282589	0.000783007
RGU295268N0925744E	RGS297911N0933516E	20181114	Google Earth	Simple	Talus-connected	Geomorphological	Relict	Extended	Mono-unit	0.00554858	0.0187422	4982.23	4954	347.719	-1.4202	-0.773506	R2	W	18.6871	29.5869	92.4888
RGU295256N0925878E	RGS297911N0933516E	20181114	Google Earth	Simple	Talus-connected	Geomorphological	Relict	Extended	Mono-unit	0.00783087	0.0402595	4965.79	4943	347.719	-1.02331	-0.773506	R2	W	17.9228	29.5833	92.4875
RGU295218N0925812E	RGS297911N0933516E	20100310	Google Earth	Simple	Debris-mantled slope-connected	Geomorphological	Active	Extended	Mono-unit	0.00584139	0.0219814	5210.04	5183	381.338	-1.1719	-3.49786	R2	NW	17.7536	29.5952	92.4972	0.000153653	0.000230488
RGU295169N0925733E	RGS297911N0933516E	20100310	Google Earth	Complex	Glacier forefield-connected	Geomorphological	Active	Extended	Mono-unit	0.020579	0.201287	5289.98	5235	381.555	-1.07855	-3.51902	R2	SW	12.8752	29.5948	92.5011	0.00192539	0.0032867
RGU295204N0925790E	RGS297911N0933516E	20100310	Google Earth	Simple	Talus-connected	Geomorphological	Active	Extended	Mono-unit	0.010988	0.060114	5302.2	5247	381.338	-1.18225	-3.49786	R2	NE	18.0971	29.5935	92.5001	0.000412487	0.000770821
RGU295178N0925759E	RGS297794N0933688E	20100310	Google Earth	Complex	Talus-connected	Geomorphological	Active	Extended	Mono-unit	0.00751047	0.0309269	5294.4	5283	381.338	-1.06116	-3.49786	R2	NE	11.1798	29.5931	92.5041	0.000339985	0.000347205
RGU295169N0925761E	RGS297794N0933688E	20100310	Google Earth	Complex	Talus-connected	Geomorphological	Active	Extended	Mono-unit	0.00916319	0.03429	5307.22	5289	381.338	-1.06938	-3.49786	R2	NE	14.8243	29.5929	92.5025	0.00028566	0.000392991
RGU295178N0925774E	RGS297732N0933602E	20100310	Google Earth	Complex	Debris-mantled slope-connected	Geomorphological	Active	Extended	Mono-unit	0.00607465	0.0155797	5351.25	5320	384.366	-1.08698	-3.70007	R2	W	18.9436	29.5903	92.5107	0.000102291	0.000152495
RGU295133N0925729E	RGS297732N0933602E	20100310	Google Earth	Complex	Talus-connected	Geomorphological	Active	Extended	Mono-unit	0.0137612	0.0939555	5319.08	5261	382.692	-1.0758	-3.50526	R2	NW	21.4326	29.5907	92.5076	0.000548052	0.00131731
RGU295111N0925738E	RGS297732N0933602E	20181114	Google Earth	Simple	Talus-connected	Geomorphological	Active	Extended	Mono-unit	0.00553921	0.0200368	5404.35	5383	367.717	-1.22362	-2.41328	R2	NW	16.9596	29.5838	92.496	0.000146411	0.000206242
RGU295110N0925859E	RGS297742N0933783E	20100310	Google Earth	Complex	Talus-connected	Geomorphological	Active	Extended	Mono-unit	0.0117847	0.0879341	5228.02	5156	383.794	-1.0144	-3.60197	R2	NE	20.3425	29.5958	92.521	0.000539156	0.00121667
RGU294780N0925856E	RGS296052N0925124E	20100310	Google Earth	Complex	Talus-connected	Geomorphological	Active	Extended	Multi-unit	0.00770843	0.0374734	5418.53	5388	383.546	-0.960624	-3.60183	R2	N	16.4431	29.6022	92.5109	0.000282173	0.00043717
RGU294762N0925745E	RGS296052N0925124E	20100310	Google Earth	Complex	Glacier forefield-connected	Geomorphological	Active	Extended	Multi-unit	0.00936659	0.0496119	5377.09	5344	383.546	-0.783856	-3.60183	R2	N	14.9996	29.6053	92.5123	0.00040858	0.000612189
RGU294907N0925789E	RGS296052N0925124E	20100310	Google Earth	Complex	Glacier forefield-connected	Geomorphological	Transitional	Extended	Multi-unit	0.0133212	0.0705959	5394.67	5358	383.546	-0.931564	-3.60183	R2	NE	12.0254	29.6064	92.5117	0.000722226	0.000934797
RGU294817N0925382E	RGS298271N0933887E	20100310	Google Earth	Complex	Talus-connected	Geomorphological	Active	Extended	Mono-unit	0.00752179	0.0249858	5165.57	5137	363.596	-0.80452	-1.85451	R2	W	25.097	29.6054	92.5225	0.000125559	0.000268791
RGU294832N0925374E	RGS297554N0933756E	20100310	Google Earth	Complex	Talus-connected	Geomorphological	Active	Extended	Mono-unit	0.0083428	0.0338666	5205.74	5149	363.596	-1.15513	-1.85451	R2	W	25.7245	29.5999	92.5218	0.000166309	0.000387176
RGU294817N0925369E	RGS297554N0933756E	20100310	Google Earth	Complex	Debris-mantled slope-connected	Geomorphological	Relict	Extended	Mono-unit	0.0102515	0.0490916	5263.44	5192	368.65	-0.58038	-2.35372	R2	E	24.2661	29.6078	92.5182
RGU294805N0925372E	RGS297648N0933784E	20181114	Google Earth	Complex	Talus-connected	Geomorphological	Active	Extended	Mono-unit	0.0143058	0.134486	5342.52	5284	373.571	-0.0813861	-2.92619	R2	E	15.9769	29.5661	92.5186	0.00104142	0.0020258
RGU294789N0925352E	RGS297648N0933784E	20181114	Google Earth	Complex	Talus-connected	Geomorphological	Transitional	Extended	Mono-unit	0.015824	0.0748365	5407.16	5371	374.133	-0.060429	-2.96933	R2	S	16.8758	29.5707	92.5176	0.000549473	0.00100258
RGU294777N0925367E	RGS297648N0933784E	20100310	Google Earth	Simple	Debris-mantled slope-connected	Geomorphological	Active	Extended	Mono-unit	0.00651267	0.0289443	5392.76	5333	381.862	-1.03827	-3.48048	R2	SW	22.5748	29.6096	92.5018	0.000160707	0.00032067
RGU294814N0925392E	RGS296058N0924914E	20100310	Google Earth	Complex	Debris-mantled slope-connected	Geomorphological	Relict	Extended	Multi-unit	0.0127225	0.091755	4970.92	4919	361.622	-1.01277	-1.85697	R2	W	18.7027	29.6065	92.4902
RGU297328N0925183E	RGS296058N0924914E	20100310	Google Earth	Complex	Debris-mantled slope-connected	Geomorphological	Relict	Extended	Multi-unit	0.0114115	0.059393	4996.73	4955	362.298	-0.999207	-1.91685	R2	SW	20.4245	29.6042	92.4913
RGU296431N0924535E	RGS296058N0924914E	20100310	Google Earth	Complex	Debris-mantled slope-connected	Geomorphological	Active	Extended	Multi-unit	0.0337053	0.209785	5275	5018	368.323	-0.955505	-2.41154	R2	W	20.0994	29.6061	92.4947	0.00130117	0.00345392
RGU296333N0924549E	RGS296058N0924914E	20100310	Google Earth	Complex	Debris-mantled slope-connected	Geomorphological	Active	Extended	Multi-unit	0.0102536	0.0439236	5087.4	5015	362.298	-0.89885	-1.91685	R2	SW	24.2902	29.6041	92.493	0.00022759	0.000528957
RGU296476N0924622E	RGS295976N0933620E	20100310	Google Earth	Simple	Talus-connected	Geomorphological	Relict	Extended	Mono-unit	0.00748494	0.0304617	4973.94	4908	350.687	-0.863251	-0.848992	R2	W	23.9225	29.6111	92.4904
RGU296433N0924652E	RGS295976N0933620E	20100310	Google Earth	Simple	Talus-connected	Geomorphological	Relict	Extended	Mono-unit	0.00497845	0.0169851	4949.3	4919	350.687	-0.88597	-0.848992	R2	W	21.9142	29.6124	92.49
RGU296411N0924651E	RGS295976N0933620E	20100310	Google Earth	Simple	Talus-connected	Geomorphological	Relict	Extended	Mono-unit	0.00681455	0.0303258	4924.82	4895	350.687	-0.88597	-0.848992	R2	SW	17.6925	29.6138	92.4888
RGU296153N0924606E	RGS295873N0933750E	20100310	Google Earth	Simple	Talus-connected	Geomorphological	Relict	Extended	Mono-unit	0.0124047	0.0651826	4960.94	4887	350.687	-0.863745	-0.848992	R2	W	20.0993	29.6154	92.4887
RGU296156N0924566E	RGS295873N0933750E	20100310	Google Earth	Complex	Talus-connected	Geomorphological	Relict	Extended	Mono-unit	0.017116	0.177115	4920.91	4861	348.417	-0.419523	-0.510368	R2	W	22.1076	29.6303	92.4904
RGU296125N0924570E	RGS296588N0933512E	20181031	Google Earth	Complex	Talus-connected	Geomorphological	Relict	Extended	Mono-unit	0.00596139	0.0139979	5414.6	5367	375.944	-0.83252	-2.72009	R2	W	22.054	29.6807	92.4949
RGU296173N0924549E	RGS297039N0933424E	20100310	Google Earth	Complex	Debris-mantled slope-connected	Geomorphological	Transitional	Extended	Mono-unit	0.00870333	0.0307995	5269.94	5209	369.037	-0.56348	-2.12476	R2	W	24.2865	29.6143	92.5263	0.00015961	0.000345489
RGU296197N0924577E	RGS297039N0933424E	20100310	Google Earth	Complex	Talus-connected	Geomorphological	Transitional	Extended	Mono-unit	0.00672125	0.0259143	5162.58	5125	380.401	0.46006	-2.80352	R2	S	21.7251	29.6807	92.5459	0.000149222	0.000280821
RGU295981N0924573E	RGS297816N0933883E	20100310	Google Earth	Complex	Talus-connected	Geomorphological	Transitional	Extended	Mono-unit	0.00789474	0.0232716	5267.96	5204	379.998	-0.419899	-2.80352	R2	S	21.9797	29.6827	92.545	0.000132528	0.000246817
RGU296002N0924564E	RGS297816N0933883E	20100310	Google Earth	Complex	Talus-connected	Geomorphological	Active	Extended	Mono-unit	0.0173057	0.117751	5036.7	4976	362.357	0.65301	-1.17379	R2	NE	16.1003	29.6734	92.5525	0.000905028	0.0017272
RGU295997N0924599E	RGS297816N0933883E	20181031	Google Earth	Complex	Debris-mantled slope-connected	Geomorphological	Transitional	Extended	Mono-unit	0.0224981	0.118049	5215.87	5128	377.793	-0.212612	-2.33273	R2	N	14.3543	29.7314	92.5282	0.00101493	0.00173244
RGU295993N0924604E	RGS297816N0933883E	20207938	Google Earth	Complex	Debris-mantled slope-connected	Geomorphological	Transitional	Extended	Mono-unit	0.0129301	0.0888847	5157.88	5120	387.916	-1.0891	-2.82664	R2	E	11.0123	29.8041	92.5279	0.000991805	0.00123247
RGU295933N0924610E	RGS297814N0934069E	20181031	Google Earth	Complex	Debris-mantled slope-connected	Geomorphological	Transitional	Extended	Mono-unit	0.013035	0.108853	5226.12	5163	387.916	-0.806186	-2.82664	R2	NW	15.2793	29.8022	92.5305	0.00088043	0.00157177
RGU296053N0924523E	RGS297814N0934069E	20181031	Google Earth	Complex	Debris-mantled slope-connected	Geomorphological	Transitional	Extended	Mono-unit	0.0133307	0.095751	5222.73	5159	387.916	-0.729812	-2.82664	R2	NE	14.1624	29.8013	92.5271	0.000834136	0.00134758
RGU296074N0924481E	RGS297888N0933926E	20181031	Google Earth	Complex	Debris-mantled slope-connected	Geomorphological	Relict	Extended	Mono-unit	0.0130755	0.0987576	5155.16	5038	384.16	-0.588103	-2.34939	R2	NE	18.7436	29.8099	92.5405
RGU296086N0924516E	RGS297888N0933926E	20181031	Google Earth	Simple	Debris-mantled slope-connected	Geomorphological	Relict	Extended	Mono-unit	0.00647909	0.028751	5031.68	4964	381.463	-0.376999	-1.98824	R2	SW	25.5076	29.8167	92.5524
RGU296095N0924530E	RGS298157N0925518E	20181031	Google Earth	Complex	Debris-mantled slope-connected	Geomorphological	Relict	Extended	Multi-unit	0.00918811	0.0310218	5019.81	4953	386.663	-0.48031	-2.41918	R2	N	21.1743	29.8155	92.552
RGU296089N0924561E	RGS298157N0925518E	20181031	Google Earth	Complex	Debris-mantled slope-connected	Geomorphological	Relict	Extended	Multi-unit	0.0132734	0.0732641	5106.1	5043	389.972	-0.31213	-2.82744	R2	NW	13.0763	29.8138	92.5538
RGU296082N0924567E	RGS298157N0925518E	20181031	Google Earth	Complex	Debris-mantled slope-connected	Geomorphological	Relict	Extended	Multi-unit	0.014012	0.0796755	5149.28	5092	389.972	-0.180561	-2.82744	R2	N	13.0189	29.8113	92.5536
RGU295863N0924723E	RGS298157N0925518E	20181031	Google Earth	Complex	Debris-mantled slope-connected	Geomorphological	Relict	Extended	Multi-unit	0.00491367	0.0112401	5181	5149	389.972	-0.0839906	-2.82744	R2	NE	19.5189	29.8099	92.5532
RGU295878N0924670E	RGS298035N0933995E	20181031	Google Earth	Complex	Debris-mantled slope-connected	Geomorphological	Transitional	Extended	Mono-unit	0.0275251	0.34554	5206.81	5065	378.249	0.566013	-2.42039	R2	NE	15.5862	29.7042	92.5521	0.0027411	0.00628609
RGU295864N0924670E	RGS298035N0933995E	20181031	Google Earth	Complex	Debris-mantled slope-connected	Geomorphological	Transitional	Extended	Mono-unit	0.00833114	0.0469645	5164.98	5114	366.634	0.904255	-1.1848	R2	NE	21.2069	29.7274	92.5489	0.000276728	0.0005732
RGU295926N0924654E	RGS298144N0934150E	20181031	Google Earth	Complex	Glacier forefield-connected	Geomorphological	Relict	Extended	Mono-unit	0.0196359	0.177339	5090.08	5033	382.264	0.235162	-2.79751	R2	E	8.96412	29.7097	92.5415
RGU295861N0924580E	RGS296926N0925646E	20100208	Google Earth	Complex	Talus-connected	Geomorphological	Transitional	Extended	Multi-unit	0.0392337	0.453398	5156.86	5012	379.287	0.216085	-2.59852	R2	NE	10.5936	29.692	92.5619	0.00525666	0.00870879
RGU295845N0924626E	RGS296926N0925646E	20100208	Google Earth	Complex	Debris-mantled slope-connected	Geomorphological	Transitional	Extended	Multi-unit	0.00937571	0.0388294	5135.4	5112	377.172	0.00095961	-2.40958	R2	N	15.0851	29.6895	92.5616	0.00031801	0.000456222
RGU295811N0924586E	RGS296926N0925646E	20100208	Google Earth	Complex	Talus-connected	Geomorphological	Transitional	Extended	Multi-unit	0.0216923	0.26356	5232.87	5152	382.17	0.00095961	-2.89198	R2	SE	12.5572	29.6871	92.5608	0.00258386	0.0045419
RGU295814N0924649E	RGS296926N0925646E	20100208	Google Earth	Complex	Talus-connected	Geomorphological	Active	Extended	Multi-unit	0.007207	0.0261229	5275.07	5253	388.88	-0.682252	-3.49958	R2	N	12.5623	29.6921	92.5498	0.000255998	0.000283536
RGU295804N0924635E	RGS298117N0934061E	20100208	Google Earth	Complex	Talus-connected	Geomorphological	Relict	Extended	Mono-unit	0.0191534	0.10088	4640.91	4464	354.081	1.1931	-0.0153093	R2	E	23.7997	29.6907	92.5841
RGU295824N0924538E	RGS298117N0934061E	20100208	Google Earth	Complex	Talus-connected	Geomorphological	Transitional	Extended	Mono-unit	0.0400968	0.314934	5036.37	4712	375.547	0.941771	-2.18613	R2	NE	15.9643	29.6896	92.5751	0.00244064	0.00562401
RGU295801N0924519E	RGS298133N0934287E	20100208	Google Earth	Simple	Debris-mantled slope-connected	Geomorphological	Relict	Extended	Mono-unit	0.0089141	0.0286636	4899.36	4815	344.316	0.99331	0.734776	R2	E	29.1796	29.6679	92.5719
RGU295796N0924469E	RGS297669N0925295E	20181031	Google Earth	Complex	Talus-connected	Geomorphological	Transitional	Extended	Multi-unit	0.00709065	0.0343596	5152.64	5124	381.862	-0.83425	-2.44336	R2	W	16.8194	29.7666	92.5293	0.0002531	0.00039395
RGU295792N0924449E	RGS297669N0925295E	20181031	Google Earth	Complex	Debris-mantled slope-connected	Geomorphological	Active	Extended	Multi-unit	0.0157088	0.162728	5203.79	5138	382.196	-0.815153	-2.48937	R2	N	11.0569	29.7647	92.5283	0.00180854	0.00254647
RGU295779N0924478E	RGS297669N0925295E	20181031	Google Earth	Complex	Debris-mantled slope-connected	Geomorphological	Active	Extended	Multi-unit	0.0139142	0.111357	5290.51	5227	382.55	-0.921851	-2.59516	R2	NE	14.2344	29.7624	92.5231	0.000965281	0.00161526
RGU295778N0924497E	RGS297669N0925295E	20181031	Google Earth	Complex	Debris-mantled slope-connected	Geomorphological	Active	Extended	Multi-unit	0.00969835	0.059582	5246.51	5193	381.862	-0.782721	-2.44336	R2	NW	21.0062	29.7635	92.53	0.000354274	0.000762641
RGU295789N0924505E	RGS297852N0934182E	20181031	Google Earth	Complex	Talus-connected	Geomorphological	Relict	Extended	Mono-unit	0.00785873	0.034584	4878	4843	372.503	0.86602	-1.51423	R2	E	12.7201	29.7772	92.5339
RGU295758N0924414E	RGS297852N0934182E	20181031	Google Earth	Complex	Talus-connected	Geomorphological	Relict	Extended	Mono-unit	0.00890684	0.0490588	4839.98	4762	371.057	0.86602	-1.27415	R2	NW	19.36	29.778	92.5363
RGU295821N0924407E	RGS298196N0935085E	20151028	Google Earth	Simple	Debris-mantled slope-connected	Geomorphological	Transitional	Extended	Mono-unit	0.00894538	0.034461	4982.07	4904	362.529	1.2689	-0.466195	R2	NE	26.1452	29.771	92.5451	0.000166691	0.000395345
RGU295985N0924437E	RGS298196N0935085E	20151028	Google Earth	Complex	Glacier forefield-connected	Geomorphological	Active	Extended	Mono-unit	0.0244195	0.356779	5203.07	5092	378.019	-0.615989	-2.33623	R2	N	14.4063	29.7273	92.5354	0.00305656	0.00653224
RGU296755N0924679E	RGS297487N0934620E	20151028	Google Earth	Complex	Debris-mantled slope-connected	Geomorphological	Relict	Extended	Mono-unit	0.00970065	0.0349898	4801.98	4729	358.129	1.14268	0.262761	R2	S	20.6679	29.7892	92.5592
RGU296766N0924700E	RGS297487N0934620E	20151028	Google Earth	Complex	Debris-mantled slope-connected	Geomorphological	Transitional	Extended	Mono-unit	0.0123026	0.0405546	5157.33	5043	367.765	0.566045	-0.782917	R2	SW	22.2901	29.7971	92.5502	0.000227896	0.000480652
RGU296788N0924700E	RGS296231N0934026E	20151028	Google Earth	Simple	Talus-connected	Geomorphological	Transitional	Extended	Mono-unit	0.0107869	0.0593209	5310.7	5233	387.756	0.0720576	-2.56365	R2	W	20.3167	29.8366	92.5247	0.000364161	0.000758633
RGU296792N0924728E	RGS296231N0934026E	20151028	Google Earth	Simple	Debris-mantled slope-connected	Geomorphological	Relict	Extended	Mono-unit	0.0120435	0.0567856	4768.36	4683	380.935	-0.223839	-1.89205	R2	W	24.3612	29.8273	92.5494
RGU296782N0924732E	RGS295616N0933994E	20091021	Google Earth	Complex	Talus-connected	Geomorphological	Transitional	Extended	Mono-unit	0.0154946	0.155404	5197.97	5167	390.328	-0.177253	-2.75092	R2	E	13.0864	29.8207	92.5634	0.00146292	0.00240955
RGU296714N0924837E	RGS295616N0933994E	20181031	Google Earth	Complex	Debris-mantled slope-connected	Geomorphological	Transitional	Extended	Mono-unit	0.00767225	0.0269954	4986	4943	373.995	0.1512	-1.33589	R2	NW	17.5369	29.8144	92.5288	0.000190959	0.000294938
RGU297093N0924829E	RGS296019N0934366E	20100310	Google Earth	Complex	Talus-connected	Geomorphological	Active	Extended	Mono-unit	0.0119184	0.0595782	4874.34	4839	378.991	-0.454756	-3.06703	R2	NW	18.5436	29.5995	92.5706	0.000399302	0.000762583
RGU296958N0924856E	RGS296019N0934366E	20100310	Google Earth	Complex	Glacier forefield-connected	Geomorphological	Relict	Extended	Mono-unit	0.0345754	0.499504	5029.05	4832	367.046	-0.695681	-2.04109	R2	NW	20.2361	29.5936	92.5666
RGU296977N0924757E	RGS296069N0934545E	20181114	Google Earth	Complex	Talus-connected	Geomorphological	Transitional	Extended	Mono-unit	0.0204839	0.191483	5180.69	5126	379.725	-0.967561	-3.19119	R2	NW	11.6444	29.5766	92.5633	0.00202212	0.00309557
RGU296997N0924812E	RGS296069N0934545E	20181114	Google Earth	Complex	Talus-connected	Geomorphological	Relict	Extended	Mono-unit	0.0131383	0.126036	5036.45	4938	359.691	-0.968846	-1.49043	R2	NW	25.0289	29.5723	92.5536
RGU296989N0924743E	RGS297091N0934438E	20181114	Google Earth	Complex	Glacier forefield-connected	Geomorphological	Transitional	Extended	Mono-unit	0.0203171	0.161162	5162.86	5094	378.9	-0.44753	-3.34622	R2	NE	14.7133	29.5529	92.5337	0.0013525	0.00251708
RGU297134N0924729E	RGS297091N0934438E	20181114	Google Earth	Simple	Debris-mantled slope-connected	Geomorphological	Active	Extended	Mono-unit	0.00619146	0.0205635	5370.48	5351	367.528	-0.533673	-2.41828	R2	E	26.4861	29.5559	92.5201	9.8278e-05	0.000212764
RGU297986N0924517E	RGS297091N0934438E	20181114	Google Earth	Complex	Talus-connected	Geomorphological	Active	Extended	Mono-unit	0.0307441	0.340425	5087.31	5005	375.71	-0.706406	-3.01784	R2	N	15.4007	29.5574	92.5463	0.00273226	0.00617459
RGU297928N0924589E	RGS298417N0935515E	20181114	Google Earth	Complex	Talus-connected	Geomorphological	Transitional	Extended	Mono-unit	0.0113325	0.0845784	5129.61	5089	361.513	-1.02767	-1.80374	R2	NE	20.2003	29.5482	92.5531	0.000522077	0.00116117
RGU297915N0924631E	RGS298417N0935515E	20181114	Google Earth	Complex	Talus-connected	Geomorphological	Active	Extended	Mono-unit	0.00799191	0.0369743	5373.23	5329	367.377	-1.3487	-2.38037	R2	N	21.3081	29.5407	92.5518	0.000216876	0.000430192
RGU297991N0924701E	RGS295275N0925392E	20181114	Google Earth	Complex	Talus-connected	Geomorphological	Transitional	Extended	Multi-unit	0.0166857	0.147137	5338.22	5281	370.139	-1.2976	-2.70862	R2	SE	11.0534	29.5281	92.5372	0.00163578	0.00225657
RGU298005N0924735E	RGS295275N0925392E	20181114	Google Earth	Complex	Talus-connected	Geomorphological	Active	Extended	Multi-unit	0.01053	0.0586743	5286.52	5257	353.748	-1.2976	-1.29541	R2	NE	15.9331	29.5263	92.5403	0.000455573	0.00074872
RGU297738N0924537E	RGS298417N0935515E	20181114	Google Earth	Complex	Debris-mantled slope-connected	Geomorphological	Relict	Extended	Mono-unit	0.0073092	0.0354153	5137.5	5125	365.911	-1.0787	-2.15534	R2	NE	11.3837	29.5446	92.5557
RGU298303N0924872E	RGS298389N0935507E	20181114	Google Earth	Complex	Talus-connected	Geomorphological	Active	Extended	Mono-unit	0.0191768	0.118983	5085.7	4943	367.478	-0.18809	-2.10804	R2	NE	22.4535	29.5952	92.5596	0.000664005	0.00174889
RGU294761N0924629E	RGS298389N0935507E	20181114	Google Earth	Complex	Talus-connected	Geomorphological	Transitional	Extended	Mono-unit	0.0108417	0.0457501	5456.06	5416	367.554	-0.945113	-2.4279	R2	E	18.6495	29.5324	92.568	0.000304943	0.000555461
RGU294737N0924595E	RGS298176N0935585E	20181114	Google Earth	Simple	Debris-mantled slope-connected	Geomorphological	Active	Extended	Mono-unit	0.0042347	0.0123635	5432.82	5415	366.733	-1.7665	-2.29621	R2	SE	17.4895	29.5314	92.5602	8.76854e-05	0.000115545
RGU294718N0924610E	RGS298176N0935585E	20181114	Google Earth	Complex	Talus-connected	Geomorphological	Transitional	Extended	Mono-unit	0.0132694	0.0998434	5394.15	5350	366.733	-1.64771	-2.29621	R2	SE	13.4422	29.5291	92.5628	0.000915456	0.00141699
RGU294712N0924526E	RGS298139N0935577E	20181114	Google Earth	Complex	Talus-connected	Geomorphological	Transitional	Extended	Mono-unit	0.0149242	0.0831729	5390.89	5370	370.901	-1.6413	-2.61677	R2	E	12.9203	29.5265	92.5697	0.000792854	0.00113805
RGU294807N0924657E	RGS298139N0935577E	20181114	Google Earth	Complex	Talus-connected	Geomorphological	Transitional	Extended	Mono-unit	0.0141075	0.0758553	5357.67	5313	359.076	-1.51008	-1.73038	R2	S	16.3624	29.5233	92.5539	0.000573927	0.00101898
RGU294858N0924688E	RGS298072N0935460E	20181114	Google Earth	Complex	Talus-connected	Geomorphological	Transitional	Extended	Mono-unit	0.0195812	0.0763501	5283.83	5208	360.305	-1.5275	-1.82535	R2	W	14.4818	29.5275	92.55	0.000650758	0.00102696
RGU294810N0924579E	RGS298072N0935460E	20181114	Google Earth	Complex	Talus-connected	Geomorphological	Active	Extended	Mono-unit	0.0115656	0.0734166	5312.35	5263	373.754	-1.6964	-2.87943	R2	NE	20.4808	29.5092	92.569	0.000447234	0.000979796
RGU294756N0924796E	RGS298012N0935420E	20181114	Google Earth	Complex	Talus-connected	Geomorphological	Transitional	Extended	Mono-unit	0.00836384	0.0413642	5010.88	4971	365.035	-1.27632	-2.26756	R2	SW	26.1994	29.4898	92.5425	0.000199698	0.00049219
RGU294746N0924846E	RGS298012N0935420E	20181114	Google Earth	Simple	Debris-mantled slope-connected	Geomorphological	Relict	Extended	Mono-unit	0.00879096	0.0489833	5096.59	5038	369.501	-1.27499	-2.83608	R2	N	23.4298	29.4842	92.5454
RGU294884N0924808E	RGS297997N0935126E	20181114	Google Earth	Complex	Debris-mantled slope-connected	Geomorphological	Active	Extended	Mono-unit	0.0127333	0.0677501	5093.21	5023	369.501	-1.1695	-2.83608	R2	NE	18.0631	29.4851	92.5439	0.000465729	0.000889763
RGU294847N0924867E	RGS297997N0935126E	20181114	Google Earth	Complex	Talus-connected	Geomorphological	Active	Extended	Mono-unit	0.0149206	0.119338	4993.78	4951	356.351	-1.211	-1.62669	R2	NE	18.412	29.491	92.539	0.000805332	0.00175515
RGU295004N0924571E	RGS297949N0935050E	20181114	Google Earth	Complex	Talus-connected	Geomorphological	Active	Extended	Mono-unit	0.0162217	0.130711	4920.55	4831	348.034	-1.37658	-0.930475	R2	NW	19.3961	29.4919	92.5308	0.000838923	0.00195775
RGU294959N0924688E	RGS297949N0935050E	20181114	Google Earth	Complex	Talus-connected	Geomorphological	Active	Extended	Mono-unit	0.0289991	0.141219	5329.17	5201	360.336	-1.24042	-2.18055	R2	S	15.9658	29.4691	92.537	0.0010943	0.00214809
RGU294969N0924798E	RGS297949N0935050E	20181114	Google Earth	Complex	Talus-connected	Geomorphological	Active	Extended	Mono-unit	0.00851862	0.0486745	5441.11	5410	369.832	-0.79129	-2.8152	R2	W	17.6064	29.4724	92.5553	0.000342994	0.000598334
RGU295074N0924811E	RGS297812N0935010E	20181114	Google Earth	Complex	Talus-connected	Geomorphological	Active	Extended	Mono-unit	0.00624065	0.0138711	5463	5441	379.62	-1.08739	-3.20355	R2	S	21.7684	29.5928	92.5302	7.97228e-05	0.000132653
RGU295368N0924879E	RGS297812N0935010E	20100310	Google Earth	Complex	Debris-mantled slope-connected	Geomorphological	Active	Extended	Mono-unit	0.0142358	0.0702449	5279.33	5238	363.568	-0.54534	-2.03676	R2	S	15.3364	29.5966	92.4756	0.000566093	0.000929223
RGU295388N0924808E	RGS297812N0935010E	20100310	Google Earth	Complex	Glacier forefield-connected	Geomorphological	Active	Extended	Mono-unit	0.00979235	0.0580726	5486.34	5436	380.006	-0.246372	-3.34539	R2	W	21.0919	29.5734	92.528	0.00034396	0.000739517
RGU295305N0924634E	RGS297821N0935074E	20100310	Google Earth	Complex	Debris-mantled slope-connected	Geomorphological	Active	Extended	Mono-unit	0.0144863	0.0815611	5317.73	5282	379.024	-0.18571	-3.24013	R2	NW	15.744	29.579	92.5408	0.000640688	0.00111163
RGU295425N0924708E	RGS297821N0935074E	20100310	Google Earth	Simple	Debris-mantled slope-connected	Geomorphological	Active	Extended	Mono-unit	0.00864253	0.0444221	5180.29	5133	379.024	-0.094472	-3.24013	R2	NE	27.3047	29.5799	92.5464	0.000206408	0.000536169
RGU295431N0924663E	RGS297902N0935175E	20100310	Google Earth	Complex	Talus-connected	Geomorphological	Active	Extended	Mono-unit	0.00594273	0.0175903	5437.05	5416	380.006	-0.039827	-3.34539	R2	E	20.4705	29.5794	92.5302	0.000107207	0.000176405
RGU295432N0924622E	RGS297902N0935175E	20100310	Google Earth	Complex	Talus-connected	Geomorphological	Active	Extended	Mono-unit	0.0140407	0.0958646	5355.36	5320	373.44	-0.23931	-2.74658	R2	S	10.7039	29.585	92.5417	0.00110013	0.0013495
RGU295454N0924572E	RGS295817N0925430E	20100310	Google Earth	Complex	Debris-mantled slope-connected	Geomorphological	Active	Extended	Multi-unit	0.0175366	0.126238	5324.09	5274	376.501	-0.18776	-3.01586	R2	SE	12.8521	29.581	92.5404	0.00120966	0.00187764
RGU295447N0924535E	RGS295817N0925430E	20100310	Google Earth	Complex	Talus-connected	Geomorphological	Active	Extended	Multi-unit	0.0095045	0.0404714	5368.06	5338	374.169	-0.23931	-2.76601	R2	E	13.3543	29.5855	92.5392	0.000373479	0.000479469
RGU295537N0924558E	RGS295817N0925430E	20100310	Google Earth	Simple	Debris-mantled slope-connected	Geomorphological	Active	Extended	Multi-unit	0.00472586	0.0146426	5330.06	5308	373.44	-0.196857	-2.74658	R2	E	14.6684	29.5833	92.5405	0.00012325	0.000141554
RGU295756N0924781E	RGS295817N0925430E	20100310	Google Earth	Complex	Debris-mantled slope-connected	Geomorphological	Active	Extended	Multi-unit	0.00795817	0.040928	5292.79	5248	373.44	-0.176926	-2.74658	R2	SE	14.5564	29.5824	92.5427	0.000347094	0.000485967
RGU295723N0924719E	RGS295817N0925430E	20100310	Google Earth	Complex	Debris-mantled slope-connected	Geomorphological	Active	Extended	Multi-unit	0.00705379	0.0176883	5242.1	5207	373.44	-0.138006	-2.74658	R2	SE	18.229	29.5815	92.5441	0.000120524	0.000177584
RGU295661N0924636E	RGS298601N0935651E	20100310	Google Earth	Complex	Talus-connected	Geomorphological	Active	Extended	Mono-unit	0.0152778	0.137293	5334.3	5258	378.583	-0.19861	-3.10522	R2	NE	15.318	29.5954	92.5503	0.00110772	0.00207664
RGU296292N0924879E	RGS298601N0935651E	20100310	Google Earth	Complex	Talus-connected	Geomorphological	Active	Extended	Mono-unit	0.0234041	0.194673	5374.74	5341	380.056	-0.685048	-3.2681	R2	NE	13.2747	29.5945	92.5421	0.00180707	0.00315755
RGU296190N0924869E	RGS298531N0935521E	20100310	Google Earth	Complex	Talus-connected	Geomorphological	Active	Extended	Mono-unit	0.0106579	0.0303524	5476.32	5451	384.519	-1.04253	-3.54057	R2	S	21.2729	29.6014	92.5355	0.000178316	0.00033948
RGU296152N0924779E	RGS298531N0935521E	20100310	Google Earth	Simple	Talus-connected	Geomorphological	Active	Extended	Mono-unit	0.0105497	0.0658054	5386.51	5334	374.831	0.65431	-2.6922	R2	NE	14.1316	29.6083	92.5568	0.000574489	0.000859204
RGU296168N0924727E	RGS297932N0935296E	20100310	Google Earth	Complex	Talus-connected	Geomorphological	Active	Extended	Mono-unit	0.00803833	0.0311445	5324.42	5293	383.778	0.36573	-3.4426	R2	E	16.0308	29.6132	92.5567	0.000240384	0.000350138
RGU296131N0924731E	RGS297932N0935296E	20100310	Google Earth	Complex	Talus-connected	Geomorphological	Active	Extended	Mono-unit	0.0156161	0.126174	5306.16	5277	374.416	0.433867	-2.57873	R2	NW	11.9631	29.6125	92.5588	0.00129744	0.0018765
RGU296226N0924684E	RGS297932N0935296E	20100310	Google Earth	Complex	Talus-connected	Geomorphological	Active	Extended	Mono-unit	0.0163346	0.121182	5179.51	5108	380.09	0.366095	-3.0042	R2	N	12.8467	29.6234	92.5611	0.00116169	0.00178775
RGU296303N0924657E	RGS297932N0935296E	20100310	Google Earth	Complex	Debris-mantled slope-connected	Geomorphological	Active	Extended	Mono-unit	0.016241	0.127307	5256.98	5232	384.373	-0.501234	-3.46671	R2	NW	12.1991	29.6139	92.5497	0.00128413	0.00189674
RGU296384N0924648E	RGS298021N0935853E	20100310	Google Earth	Complex	Talus-connected	Geomorphological	Active	Extended	Mono-unit	0.0363042	0.35076	5177.83	5065	374.773	0.295222	-2.60803	R2	NW	14.4591	29.6247	92.5543	0.00299425	0.00640021
RGU296378N0924667E	RGS298021N0935853E	20181114	Google Earth	Complex	Debris-mantled slope-connected	Geomorphological	Active	Extended	Mono-unit	0.0132519	0.0927774	5362.94	5308	355.824	-1.4505	-1.62163	R2	SW	14.0251	29.5606	92.4708	0.000815985	0.00129752
RGU296374N0924653E	RGS298194N0933805E	20100310	Google Earth	Complex	Debris-mantled slope-connected	Geomorphological	Active	Extended	Mono-unit	0.00643081	0.0241092	5586.87	5565	373.798	0.13481	-2.59344	R2	W	20.3083	29.6212	92.5391	0.000148061	0.000257514
RGU296369N0924678E	RGS298194N0933805E	20100310	Google Earth	Complex	Talus-connected	Geomorphological	Transitional	Extended	Mono-unit	0.0144228	0.0810247	5401.27	5331	387.621	1.05624	-3.7339	R2	NE	16.9799	29.631	92.5436	0.000591368	0.00110287
RGU296369N0924705E	RGS296405N0934998E	20100310	Google Earth	Complex	Debris-mantled slope-connected	Geomorphological	Active	Extended	Mono-unit	0.0148927	0.117854	5383.15	5333	377.197	-0.374884	-2.94424	R2	N	16.5106	29.6147	92.5316	0.000883909	0.001729
RGU296354N0924733E	RGS296405N0934998E	20100208	Google Earth	Simple	Debris-mantled slope-connected	Geomorphological	Relict	Extended	Mono-unit	0.00764675	0.0227063	4827.48	4791	360.15	0.670959	-0.812079	R2	E	20.3611	29.6717	92.5745
RGU296336N0924744E	RGS296405N0934998E	20151123	Google Earth	Complex	Debris-mantled slope-connected	Geomorphological	Relict	Extended	Mono-unit	0.0109108	0.028843	5067.06	5032	372.223	0.92902	-0.803926	R2	NE	15.0056	29.817	92.5803
RGU296431N0924805E	RGS296405N0934998E	20151123	Google Earth	Simple	Debris-mantled slope-connected	Geomorphological	Relict	Extended	Mono-unit	0.00735647	0.0158998	5106.81	5074	372.231	0.92902	-0.91045	R2	N	10.0386	29.8165	92.5794
RGU296437N0924830E	RGS296612N0934953E	20151123	Google Earth	Complex	Talus-connected	Geomorphological	Relict	Extended	Mono-unit	0.00768069	0.0356502	5120	5100	382.598	0.92902	-2.10766	R2	NE	9.08762	29.816	92.5776
RGU296443N0924853E	RGS296612N0934953E	20151123	Google Earth	Complex	Debris-mantled slope-connected	Geomorphological	Relict	Extended	Mono-unit	0.00480324	0.0132634	5095.24	5082	379.584	0.92902	-1.62584	R2	NE	10.109	29.8167	92.5783
RGU296515N0924717E	RGS296693N0935062E	20151123	Google Earth	Complex	Debris-mantled slope-connected	Geomorphological	Transitional	Extended	Mono-unit	0.0154861	0.118345	5183.14	5111	389	0.587815	-2.56517	R2	E	13.3415	29.8165	92.5757	0.00109314	0.00173764
RGU296607N0924741E	RGS296693N0935062E	20091021	Google Earth	Complex	Debris-mantled slope-connected	Geomorphological	Relict	Extended	Mono-unit	0.0186833	0.122094	5222.06	5072	390.572	0.66442	-2.66143	R2	NE	15.9355	29.8274	92.5782
RGU296657N0924853E	RGS296744N0934943E	20091021	Google Earth	Simple	Debris-mantled slope-connected	Geomorphological	Transitional	Extended	Mono-unit	0.00581976	0.0218011	5209.12	5154	372.223	0.76828	-0.803926	R2	NE	28.5735	29.8229	92.5796	9.71552e-05	0.000228221
RGU296672N0924824E	RGS296744N0934943E	20091021	Google Earth	Simple	Talus-connected	Geomorphological	Transitional	Extended	Mono-unit	0.00897871	0.0416073	5078.84	5013	384.351	0.393796	-2.04107	R2	NW	21.837	29.8381	92.5755	0.00023842	0.000495663
RGU296660N0924816E	RGS297175N0935550E	20100208	Google Earth	Simple	Debris-mantled slope-connected	Geomorphological	Active	Extended	Mono-unit	0.0193384	0.0876564	4737.99	4593	351.6	-0.0329024	0.785092	R2	W	22.806	29.7562	92.5798	0.000482018	0.00121206
RGU296696N0924754E	RGS297175N0935550E	20100208	Google Earth	Complex	Debris-mantled slope-connected	Geomorphological	Active	Extended	Mono-unit	0.0131472	0.0749249	4920.74	4778	356.068	-0.61984	0.368234	R2	W	30.3146	29.7555	92.5863	0.000316394	0.001004
RGU296671N0924750E	RGS297090N0935463E	20100208	Google Earth	Simple	Debris-mantled slope-connected	Geomorphological	Active	Extended	Mono-unit	0.00871512	0.0321258	4805.1	4722	351.6	-0.248853	0.785092	R2	W	24.0283	29.7603	92.5828	0.000168165	0.000363418
RGU296779N0924831E	RGS297090N0935463E	201811114	Google Earth	Complex	Talus-connected	Geomorphological	Active	Extended	Mono-unit	0.0107211	0.0757551	4872.68	4831	381.485	-0.187998	-3.14897	R2	NW	18.9283	29.6021	92.5732	0.000497767	0.00101736
RGU296776N0924850E	RGS295667N0935804E	201811114	Google Earth	Complex	Glacier forefield-connected	Geomorphological	Transitional	Extended	Mono-unit	0.0153492	0.112931	5330.85	5254	375.54	-0.937	-2.73765	R2	N	15.6958	29.5812	92.5759	0.000889766	0.00164271
RGU296819N0924820E	RGS295667N0935804E	201811114	Google Earth	Complex	Talus-connected	Geomorphological	Active	Extended	Mono-unit	0.0144118	0.0779341	5354.76	5325	375.474	-0.936885	-2.71594	R2	SW	19.3763	29.5791	92.5783	0.000500686	0.00105258
RGU296263N0925194E	RGS297996N0934122E	201811114	Google Earth	Complex	Glacier forefield-connected	Geomorphological	Relict	Extended	Mono-unit	0.0264598	0.309032	5239.95	5172	373.248	-1.00715	-2.56749	R2	W	10.8736	29.5755	92.5681
RGU296233N0925200E	RGS297996N0934122E	201811114	Google Earth	Complex	Talus-connected	Geomorphological	Relict	Extended	Mono-unit	0.0545951	0.641588	5148.88	4804	373.122	-0.0100298	-2.35488	R2	NW	14.741	29.6108	92.581
RGU296219N0925215E	RGS297996N0934122E	201811114	Google Earth	Complex	Debris-mantled slope-connected	Geomorphological	Transitional	Extended	Mono-unit	0.0181279	0.0886915	5379.44	5311	377.013	0.0942742	-2.93122	R2	NE	15.1361	29.5471	92.59	0.000723987	0.00122925
RGU296169N0925221E	RGS297996N0934122E	201811114	Google Earth	Complex	Talus-connected	Geomorphological	Transitional	Extended	Mono-unit	0.0043659	0.0101809	5384.25	5370	379.073	-0.734813	-3.21082	R2	N	23.8732	29.5326	92.5844	5.36184e-05	9.15222e-05
RGU296154N0925192E	RGS296539N0935584E	201811114	Google Earth	Complex	Talus-connected	Geomorphological	Transitional	Extended	Mono-unit	0.00459978	0.010842	5383.08	5368	379.073	-0.75201	-3.21082	R2	N	27.9007	29.5329	92.5823	4.9385e-05	9.86996e-05
RGU296216N0925049E	RGS296539N0935584E	201811114	Google Earth	Complex	Talus-connected	Geomorphological	Transitional	Extended	Mono-unit	0.00617148	0.0206309	5407.52	5377	378.727	-0.75201	-3.18732	R2	N	24.3178	29.5335	92.5799	0.000106785	0.000213601
RGU296243N0925027E	RGS296539N0935584E	201811114	Google Earth	Complex	Talus-connected	Geomorphological	Active	Extended	Mono-unit	0.0111988	0.0565695	5397.15	5365	377.41	-1.15716	-3.13025	R2	W	19.296	29.53	92.5724	0.000364884	0.000716607
RGU296370N0925019E	RGS294440N0935535E	201811114	Google Earth	Simple	Talus-connected	Geomorphological	Active	Extended	Mono-unit	0.00474777	0.0168034	5365.9	5331	375.999	-1.4397	-3.01623	R2	SW	23.6783	29.5268	92.5744	8.91824e-05	0.000166978
RGU296297N0925051E	RGS294440N0935535E	201811114	Google Earth	Complex	Debris-mantled slope-connected	Geomorphological	Transitional	Extended	Mono-unit	0.0115096	0.067121	5294.1	5252	370.963	-1.1241	-2.49817	R2	SW	25.257	29.5256	92.5878	0.000335299	0.000879858
RGU296645N0924907E	RGS293550N0931665E	201811114	Google Earth	Complex	Debris-mantled slope-connected	Geomorphological	Relict	Extended	Mono-unit	0.00816887	0.0275622	5278.79	5211	366.337	-1.4397	-2.17132	R2	NW	22.3586	29.5218	92.5812
RGU296640N0924921E	RGS293550N0931665E	201811114	Google Earth	Complex	Debris-mantled slope-connected	Geomorphological	Relict	Extended	Mono-unit	0.0233496	0.172312	5176.68	5107	363.551	-1.72516	-2.03915	R2	W	12.7356	29.5169	92.5733
RGU296725N0925061E	RGS296096N0935316E	201811114	Google Earth	Complex	Debris-mantled slope-connected	Geomorphological	Relict	Extended	Mono-unit	0.0119279	0.0576018	5254.37	5212	366.671	-1.53953	-2.21517	R2	NW	18.5991	29.5204	92.579
RGU296677N0925103E	RGS296096N0935316E	201811114	Google Earth	Complex	Debris-mantled slope-connected	Geomorphological	Relict	Extended	Mono-unit	0.0112021	0.0343815	5204.98	5176	365.953	-1.5595	-2.27035	R2	NW	8.89828	29.5178	92.5759
RGU296736N0925182E	RGS293556N0937546E	201811114	Google Earth	Simple	Talus-connected	Geomorphological	Active	Extended	Mono-unit	0.00567613	0.0225528	5225.04	5194	359.75	-1.5595	-1.70492	R2	NW	24.6441	29.5169	92.5761	0.000115282	0.000237697
RGU296799N0925062E	RGS293556N0937546E	201811114	Google Earth	Complex	Talus-connected	Geomorphological	Active	Extended	Mono-unit	0.0047949	0.0123173	5224.62	5211	363.878	-1.5595	-2.18006	R2	W	13.6102	29.5178	92.5774	0.000111568	0.000115027
RGU296782N0925009E	RGS296782N0925009E	201811114	Google Earth	Simple	Talus-connected	Geomorphological	Active	Extended	Mono-unit	0.00935662	0.066063	5134.02	5099	359.75	-1.90905	-1.70492	R2	W	15.2788	29.5133	92.5729	0.000534352	0.000863242
RGU296809N0925001E	RGS296809N0925001E	201811114	Google Earth	Simple	Talus-connected	Geomorphological	Relict	Extended	Mono-unit	0.00698301	0.0312405	5150.17	5117	359.75	-1.97379	-1.70492	R2	W	16.8275	29.5111	92.5738
RGU296831N0925091E	RGS296831N0925091E	201811114	Google Earth	Complex	Talus-connected	Geomorphological	Transitional	Extended	Mono-unit	0.00642857	0.0227908	5471.85	5455	386.085	-2.3158	-3.84563	R2	SW	18.984	29.511	92.5859	0.00014933	0.00024071
RGU296810N0925149E	RGS296810N0925149E	201811114	Google Earth	Complex	Talus-connected	Geomorphological	Transitional	Extended	Mono-unit	0.0281302	0.238452	5195.41	5087	371.363	-0.365076	-2.76454	R2	NE	14.3434	29.478	92.5856	0.00205161	0.00402776
RGU296781N0925203E	RGS296781N0925203E	201811114	Google Earth	Complex	Talus-connected	Geomorphological	Active	Extended	Mono-unit	0.0146202	0.101758	5396.82	5353	371.537	-0.81288	-2.76814	R2	SW	18.5194	29.4907	92.5789	0.000682858	0.00144966
RGU296756N0925253E	RGS296756N0925253E	20100310	Google Earth	Complex	Debris-mantled slope-connected	Geomorphological	Active	Extended	Mono-unit	0.00441461	0.0102667	5104.18	5091	343.054	0.23946	-0.883618	R1	NW	25.4657	29.6644	92.177	5.08939e-05	9.24479e-05
RGU296829N0925243E	RGS296829N0925243E	20100310	Google Earth	Simple	Debris-mantled slope-connected	Geomorphological	Active	Extended	Mono-unit	0.00427046	0.0136779	5282.71	5261	351.411	0.5902	-1.82255	R1	W	21.6687	29.6356	92.1768	7.89564e-05	0.000130438
RGU296904N0925020E	RGS296904N0925020E	20100310	Google Earth	Simple	Debris-mantled slope-connected	Geomorphological	Active	Extended	Mono-unit	0.00767901	0.0194052	5097.05	5049	357.225	0.0775435	-2.2605	R1	N	21.4748	29.6457	92.1769	0.00011298	0.000198465
RGU297010N0924887E	RGS297010N0924887E	20100310	Google Earth	Complex	Debris-mantled slope-connected	Geomorphological	Active	Extended	Mono-unit	0.00671562	0.0202449	5225.25	5206	348.94	-0.0103431	-1.71099	R1	NW	17.6934	29.6185	92.178	0.00014198	0.000208815
RGU297181N0924982E	RGS297181N0924982E	20100310	Google Earth	Complex	Talus-connected	Geomorphological	Active	Extended	Mono-unit	0.0240683	0.113848	5171.34	5051	353.591	0.000533795	-1.99048	R1	NW	15.508	29.6392	92.1784	0.000907578	0.00165871
RGU297067N0925023E	RGS297067N0925023E	20100310	Google Earth	Complex	Debris-mantled slope-connected	Geomorphological	Active	Extended	Mono-unit	0.0224592	0.154669	5147.74	5100	350.4	0.182885	-1.80579	R1	NW	15.3815	29.6267	92.1817	0.00124289	0.00239589
RGU296951N0925020E	RGS296951N0925020E	20100310	Google Earth	Complex	Talus-connected	Geomorphological	Relict	Extended	Mono-unit	0.00783996	0.0392296	5078.8	5044	351.512	0.35376	-1.83021	R1	NW	15.6406	29.6335	92.185
RGU297048N0924938E	RGS297048N0924938E	20100310	Google Earth	Simple	Talus-connected	Geomorphological	Active	Extended	Mono-unit	0.0121732	0.064622	5073.88	5022	351.645	0.35376	-1.78326	R1	N	16.7096	29.6353	92.187	0.000479057	0.000840696
RGU298069N0923261E	RGS298069N0923261E	20100310	Google Earth	Simple	Talus-connected	Geomorphological	Active	Extended	Mono-unit	0.00539995	0.014334	5105.06	5086	351.35	0.35376	-1.8642	R1	NW	17.0904	29.631	92.1839	0.000103962	0.000137983
RGU298356N0923243E	RGS298356N0923243E	20100310	Google Earth	Simple	Talus-connected	Geomorphological	Active	Extended	Mono-unit	0.00809092	0.0357419	5095.62	5067	349.976	0.35376	-1.76673	R1	NW	12.1485	29.6321	92.184	0.000362002	0.000413044
RGU298531N0923234E	RGS298531N0923234E	20100310	Google Earth	Complex	Talus-connected	Geomorphological	Active	Extended	Mono-unit	0.0146503	0.0661569	4997.28	4955	353.092	0.55228	-1.92997	R1	N	16.371	29.6383	92.1903	0.000500292	0.000864715
RGU298063N0923327E	RGS298063N0923327E	20100310	Google Earth	Complex	Talus-connected	Geomorphological	Active	Extended	Mono-unit	0.00928875	0.0315432	5227.6	5186	358.297	-0.338566	-2.68519	R1	NW	26.021	29.5841	92.1914	0.000153255	0.000355525
RGU298096N0923314E	RGS298096N0923314E	20100310	Google Earth	Simple	Talus-connected	Geomorphological	Active	Extended	Mono-unit	0.00462413	0.0122983	5222.13	5201	356.812	-0.44503	-2.61151	R1	NW	21.4708	29.5786	92.1935	7.16155e-05	0.000114814
RGU298044N0923639E	RGS298044N0923639E	20100310	Google Earth	Complex	Debris-mantled slope-connected	Geomorphological	Active	Extended	Mono-unit	0.00658869	0.0163585	5296.85	5262	336.626	-0.21617	-1.01886	R1	W	19.4872	29.5671	92.1834	0.000104519	0.000161686
RGU297705N0923835E	RGS297705N0923835E	20100310	Google Earth	Simple	Talus-connected	Geomorphological	Active	Extended	Mono-unit	0.00475537	0.0104304	5052.36	5028	317.297	0.21124	0.531414	R1	NE	16.3882	29.5217	92.1979	7.87964e-05	9.42204e-05
RGU297694N0923857E	RGS297694N0923857E	20100310	Google Earth	Complex	Talus-connected	Geomorphological	Active	Extended	Mono-unit	0.0100042	0.0158611	5145.7	5119	324.586	0.230736	-0.142306	R1	N	27.9195	29.5297	92.2018	7.22019e-05	0.000155805
RGU297674N0923929E	RGS297674N0923929E	20100310	Google Earth	Complex	Talus-connected	Geomorphological	Active	Extended	Mono-unit	0.00539457	0.0170658	5192.05	5154	342.215	-0.050213	-1.359	R1	NW	28.32	29.571	92.2053	7.66767e-05	0.000170112
RGU297756N0923998E	RGS297756N0923998E	20100310	Google Earth	Complex	Debris-mantled slope-connected	Geomorphological	Transitional	Extended	Mono-unit	0.00764661	0.0275677	5233	5213	356.041	0.0842226	-2.47243	R1	SW	17.8447	29.5728	92.2124	0.00019175	0.000302457
RGU297756N0924038E	RGS297756N0924038E	20100310	Google Earth	Complex	Talus-connected	Geomorphological	Relict	Extended	Mono-unit	0.0160738	0.106267	5147.23	5043	349.545	0.168608	-0.758578	R1	W	17.0593	29.7461	92.2088
RGU297754N0924013E	RGS297754N0924013E	20100310	Google Earth	Complex	Debris-mantled slope-connected	Geomorphological	Relict	Extended	Mono-unit	0.0144751	0.0575619	5225.29	5144	343.665	-0.0199776	-1.29777	R1	W	19.1168	29.5989	92.2114
RGU297710N0924025E	RGS297710N0924025E	20100310	Google Earth	Simple	Talus-connected	Geomorphological	Transitional	Extended	Mono-unit	0.00370121	0.0104872	5038.75	5028	338.015	0.48038	-1.62305	R1	W	18.6153	29.471	92.2114	7.00253e-05	9.48357e-05
RGU297517N0924046E	RGS297517N0924046E	20100310	Google Earth	Complex	Talus-connected	Geomorphological	Active	Extended	Mono-unit	0.0127609	0.0314302	5186.73	5167	338.069	-0.11364	-0.86018	R1	NE	13.9424	29.5952	92.2107	0.000278037	0.000353996
RGU297528N0923912E	RGS297528N0923912E	20100310	Google Earth	Complex	Talus-connected	Geomorphological	Active	Extended	Mono-unit	0.0193741	0.082066	5245.71	5196	345.663	0.398188	-1.49666	R1	NE	17.4839	29.5902	92.2133	0.000582216	0.0011199
RGU298283N0923963E	RGS298283N0923963E	20100310	Google Earth	Complex	Talus-connected	Geomorphological	Active	Extended	Mono-unit	0.0168989	0.104351	5200.77	5157	360.126	0.0527406	-2.5817	R1	N	14.2655	29.6146	92.212	0.000902623	0.0014941
RGU298287N0923939E	RGS298287N0923939E	20100310	Google Earth	Complex	Talus-connected	Geomorphological	Active	Extended	Mono-unit	0.0142084	0.0689259	5268.6	5220	361.014	0.571836	-2.65419	R1	W	14.1404	29.612	92.2145	0.000601362	0.000908325
RGU298290N0923926E	RGS298290N0923926E	20100310	Google Earth	Simple	Talus-connected	Geomorphological	Active	Extended	Mono-unit	0.00631491	0.012003	5331.75	5274	363.509	0.58379	-2.81552	R1	W	32.3714	29.6119	92.2165	4.77841e-05	0.000111514
RGU298272N0923893E	RGS298272N0923893E	20100310	Google Earth	Complex	Talus-connected	Geomorphological	Transitional	Extended	Mono-unit	0.0185366	0.18493	5086.28	4958	349.38	0.679086	-1.54234	R1	N	15.5966	29.6263	92.2114	0.00146606	0.00296888
RGU298377N0924000E	RGS298377N0924000E	20100310	Google Earth	Complex	Debris-mantled slope-connected	Geomorphological	Relict	Extended	Mono-unit	0.00508914	0.0163532	5112.63	5078	338.387	-0.180754	0.409325	R1	N	28.2589	29.7515	92.2105
RGU298189N0924176E	RGS298189N0924176E	20100310	Google Earth	Simple	Talus-connected	Geomorphological	Active	Extended	Mono-unit	0.00454494	0.0140133	5263.19	5240	349.992	0.06203	-2.06695	R1	N	24.4437	29.5605	92.2132	7.21817e-05	0.000134286
RGU298084N0924140E	RGS298084N0924140E	20100310	Google Earth	Simple	Talus-connected	Geomorphological	Active	Extended	Mono-unit	0.00433472	0.0124778	5243.73	5213	349.992	0.1883	-2.06695	R1	N	29.8701	29.559	92.2159	5.34018e-05	0.000116829
RGU298071N0924248E	RGS298071N0924248E	20100310	Google Earth	Complex	Debris-mantled slope-connected	Geomorphological	Active	Extended	Mono-unit	0.00683196	0.0195319	5195.62	5167	333.216	-0.10458	-1.00181	R1	NW	27.2193	29.4932	92.2183	9.10177e-05	0.000200021
RGU298062N0924310E	RGS298062N0924310E	20100310	Google Earth	Complex	Talus-connected	Geomorphological	Active	Extended	Mono-unit	0.0137576	0.0490538	5014.72	4993	332.901	0.051841	-0.789055	R1	N	18.4566	29.5285	92.2203	0.000330261	0.000603934
RGU298088N0924377E	RGS298088N0924377E	20100310	Google Earth	Complex	Talus-connected	Geomorphological	Active	Extended	Mono-unit	0.00678539	0.0224093	5184.46	5156	349.593	0.1883	-1.99465	R1	N	25.6084	29.5588	92.2195	0.00011051	0.000235883
RGU298089N0924426E	RGS298089N0924426E	20100310	Google Earth	Simple	Talus-connected	Geomorphological	Active	Extended	Mono-unit	0.0112904	0.0950579	5232.22	5197	356.217	1.02285	-2.13562	R1	NE	12.7512	29.6288	92.2206	0.000917967	0.00133588
RGU297963N0924397E	RGS297963N0924397E	20100310	Google Earth	Complex	Talus-connected	Geomorphological	Active	Extended	Mono-unit	0.00697302	0.0158595	5223.11	5210	354.867	0.395785	-2.33703	R1	N	8.07727	29.5738	92.2235	0.000240581	0.000155786
RGU297810N0924277E	RGS297810N0924277E	20100310	Google Earth	Complex	Talus-connected	Geomorphological	Active	Extended	Mono-unit	0.0223635	0.0605076	5182.97	5155	349.14	0.533898	-1.80379	R1	NW	16.1131	29.5763	92.2287	0.000464696	0.00077688
RGU297782N0924373E	RGS297782N0924373E	20100310	Google Earth	Simple	Talus-connected	Geomorphological	Active	Extended	Mono-unit	0.00456725	0.0157176	5119.3	5092	344.594	0.436557	-1.5091	R1	N	24.0113	29.5617	92.2326	8.23298e-05	0.000154116
RGU297680N0924421E	RGS297680N0924421E	20100310	Google Earth	Complex	Talus-connected	Geomorphological	Relict	Extended	Mono-unit	0.0304997	0.117623	5216.61	5143	351.947	0.905147	-1.8304	R1	NW	15.3838	29.6106	92.2284
RGU297695N0924431E	RGS296195N0922263E	20100310	Google Earth	Complex	Debris-mantled slope-connected	Geomorphological	Active	Extended	Multi-unit	0.0119615	0.046873	5243.02	5132	365.674	1.09986	-2.96751	R1	NE	19.5157	29.6191	92.2258	0.000299067	0.00057186
RGU297716N0924449E	RGS296195N0922263E	20100310	Google Earth	Simple	Debris-mantled slope-connected	Geomorphological	Active	Extended	Multi-unit	0.0106714	0.047807	5325.53	5280	365.674	0.840345	-2.96751	R1	E	18.074	29.617	92.224	0.000328445	0.000585562
RGU297391N0924379E	RGS296195N0922263E	20100310	Google Earth	Simple	Debris-mantled slope-connected	Geomorphological	Active	Extended	Multi-unit	0.0102616	0.032155	5230.8	5135	364.661	1.09924	-2.7032	R1	N	22.9892	29.6188	92.2269	0.000175484	0.000363815
RGU297225N0924249E	RGS297225N0924249E	20100310	Google Earth	Complex	Debris-mantled slope-connected	Geomorphological	Active	Extended	Mono-unit	0.00538188	0.0201623	5104.04	5071	347.946	1.1026	-1.45717	R1	N	22.9615	29.6201	92.2289	0.00011016	0.000207792
RGU297190N0924238E	RGS297190N0924238E	20100310	Google Earth	Simple	Talus-connected	Geomorphological	Active	Extended	Mono-unit	0.00611092	0.0276033	5184.12	5157	352.107	0.450831	-2.16474	R1	N	23.9874	29.5554	92.2352	0.000144723	0.000302925
RGU297113N0924197E	RGS297113N0924197E	20100310	Google Earth	Simple	Debris-mantled slope-connected	Geomorphological	Active	Extended	Mono-unit	0.0151488	0.0665762	5199.36	5147	341.267	1.01342	-1.50393	R1	N	14.1368	29.5199	92.2458	0.000581005	0.000871295
RGU294717N0924368E	RGS294717N0924368E	20100310	Google Earth	Simple	Debris-mantled slope-connected	Geomorphological	Active	Extended	Mono-unit	0.00583844	0.0140787	5208.72	5169	341.373	1.05053	-1.51321	R1	N	29.5354	29.5231	92.2453	6.08733e-05	0.000135039
RGU294850N0924388E	RGS294850N0924388E	20151123	Google Earth	Simple	Debris-mantled slope-connected	Geomorphological	Active	Extended	Mono-unit	0.00413552	0.0107686	5105.46	5085	361.505	1.1302	-2.36159	R1	NW	21.3903	29.677	92.2137	6.29326e-05	9.78979e-05
RGU295280N0924418E	RGS295280N0924418E	20181031	Google Earth	Simple	Talus-connected	Geomorphological	Relict	Extended	Mono-unit	0.01261	0.0617548	4955.81	4917	353.827	-0.54152	-1.00662	R1	NW	12.7989	29.7653	92.224
RGU295522N0924498E	RGS295522N0924498E	20181031	Google Earth	Complex	Talus-connected	Geomorphological	Relict	Extended	Mono-unit	0.00551838	0.0215691	5018.58	4989	361.737	-0.54152	-1.78086	R1	N	18.7912	29.7641	92.2284
RGU295465N0924458E	RGS295465N0924458E	20181031	Google Earth	Simple	Talus-connected	Geomorphological	Relict	Extended	Mono-unit	0.00433935	0.0131167	5218.25	5194	354.378	-0.68493	-1.23772	R1	N	22.3046	29.7595	92.2343
RGU296629N0921760E	RGS296629N0921760E	20181031	Google Earth	Simple	Debris-mantled slope-connected	Geomorphological	Transitional	Extended	Mono-unit	0.00430573	0.0139259	5220	5198	363.071	-0.28169	-1.81232	R1	N	23.5364	29.7716	92.2429	7.43302e-05	0.000133282
RGU296644N0921770E	RGS296644N0921770E	20181031	Google Earth	Complex	Debris-mantled slope-connected	Geomorphological	Relict	Extended	Mono-unit	0.00889975	0.045633	5199.54	5179	363.358	-0.542948	-1.83415	R1	N	10.9525	29.7728	92.2456
RGU296356N0921768E	RGS296356N0921768E	20181031	Google Earth	Simple	Talus-connected	Geomorphological	Transitional	Extended	Mono-unit	0.00410205	0.0104431	5230.67	5215	359.453	-1.2531	-1.24808	R1	NW	20.7371	29.8011	92.2475	6.28641e-05	9.43575e-05
RGU296185N0921780E	RGS296185N0921780E	20181031	Google Earth	Complex	Talus-connected	Geomorphological	Relict	Extended	Mono-unit	0.00639287	0.0311268	5136.45	5103	365.84	-1.2531	-1.80426	R1	W	26.7476	29.8072	92.2464
RGU296392N0921784E	RGS296392N0921784E	20181031	Google Earth	Complex	Talus-connected	Geomorphological	Relict	Extended	Mono-unit	0.0109058	0.0500071	5201.94	5153	361.581	-1.3074	-1.42929	R1	N	16.4314	29.805	92.2535
RGU296267N0921817E	RGS296267N0921817E	20181031	Google Earth	Complex	Talus-connected	Geomorphological	Relict	Extended	Mono-unit	0.00592052	0.0209462	5312.38	5277	372.56	-1.3074	-2.45398	R1	W	23.9118	29.8055	92.2599
RGU296335N0921850E	RGS296335N0921850E	20181031	Google Earth	Complex	Talus-connected	Geomorphological	Relict	Extended	Mono-unit	0.007107	0.0237649	5213.23	5187	361.59	-0.779166	-1.50243	R1	W	22.7832	29.7962	92.2528
RGU296353N0921870E	RGS296353N0921870E	20181031	Google Earth	Simple	Talus-connected	Geomorphological	Relict	Extended	Mono-unit	0.00757505	0.0313051	5204.68	5167	368.615	-0.73538	-2.24972	R1	N	20.7548	29.7859	92.2548
RGU296310N0921839E	RGS296310N0921839E	20181031	Google Earth	Simple	Talus-connected	Geomorphological	Relict	Extended	Mono-unit	0.00479967	0.0175873	5213.95	5189	364.9	-0.73538	-1.96257	R1	NW	24.3286	29.7868	92.2576
RGU296321N0921840E	RGS296321N0921840E	20181031	Google Earth	Complex	Talus-connected	Geomorphological	Relict	Extended	Mono-unit	0.015486	0.135705	5168.08	5090	361.905	-0.20041	-1.65947	R1	NE	16.256	29.7702	92.2579
RGU296383N0921903E	RGS296383N0921903E	20181031	Google Earth	Complex	Debris-mantled slope-connected	Geomorphological	Relict	Extended	Mono-unit	0.0170331	0.078168	4730.79	4656	349.067	0.0229481	-0.436321	R1	NW	21.9548	29.7338	92.2606
RGU296451N0921874E	RGS296451N0921874E	20181031	Google Earth	Simple	Debris-mantled slope-connected	Geomorphological	Transitional	Extended	Mono-unit	0.0102277	0.0431996	5152.67	5114	367.251	-0.452928	-2.2241	R1	S	15.1659	29.762	92.2597	0.000351961	0.000518511
RGU296558N0921860E	RGS296558N0921860E	20181031	Google Earth	Simple	Debris-mantled slope-connected	Geomorphological	Relict	Extended	Mono-unit	0.0332126	0.279196	5032.83	4792	355.832	-0.225137	-1.16686	R1	SE	16.6942	29.7551	92.2683
RGU295841N0921914E	RGS295841N0921914E	20181031	Google Earth	Complex	Talus-connected	Geomorphological	Transitional	Extended	Mono-unit	0.0132762	0.0576793	5042.57	4979	343.079	1.1889	-1.1253	R1	NE	14.2468	29.6072	92.2373	0.00049956	0.000733511
RGU295786N0921935E	RGS295786N0921935E	20181031	Google Earth	Simple	Talus-connected	Geomorphological	Relict	Extended	Mono-unit	0.00809493	0.0306156	5035.28	5016	359.431	-0.214123	-1.3652	R1	N	14.4159	29.7719	92.2621
RGU295671N0921834E	RGS295671N0921834E	20181031	Google Earth	Simple	Talus-connected	Geomorphological	Relict	Extended	Mono-unit	0.00552409	0.018653	5155	5138	366.506	-0.180661	-2.18676	R1	NW	15.5859	29.7685	92.2627
RGU295096N0921862E	RGS295096N0921862E	20181031	Google Earth	Simple	Talus-connected	Geomorphological	Relict	Extended	Mono-unit	0.00660545	0.0253986	5030.73	5008	359.431	-0.210542	-1.3652	R1	N	16.6111	29.7721	92.2648
RGU295103N0921879E	RGS295103N0921879E	20181031	Google Earth	Simple	Debris-mantled slope-connected	Geomorphological	Relict	Extended	Mono-unit	0.00490171	0.0120029	5005.86	4973	352.791	0.18699	-1.02199	R1	NE	29.0358	29.7236	92.2672
RGU295215N0921962E	RGS295215N0921962E	20181031	Google Earth	Simple	Talus-connected	Geomorphological	Relict	Extended	Mono-unit	0.00497847	0.0110286	5156.42	5121	359.077	0.266667	-1.69498	R1	N	21.2961	29.7189	92.2707
RGU295297N0922018E	RGS295297N0922018E	20181031	Google Earth	Simple	Talus-connected	Geomorphological	Relict	Extended	Mono-unit	0.00551453	0.0181476	5103.4	5080	359.077	0.18699	-1.69498	R1	NW	23.2418	29.7205	92.271
RGU295710N0922053E	RGS295710N0922053E	20181031	Google Earth	Complex	Talus-connected	Geomorphological	Transitional	Extended	Mono-unit	0.00920531	0.0373272	5236.64	5189	376.384	-0.38961	-2.62537	R1	SW	17.8251	29.8249	92.2719	0.000259909	0.000435123
RGU295728N0922124E	RGS295728N0922124E	20181031	Google Earth	Simple	Talus-connected	Geomorphological	Transitional	Extended	Mono-unit	0.00896982	0.0518994	5288.61	5235	381.561	-0.6113	-3.14426	R1	SW	21.3139	29.8194	92.2806	0.000304341	0.000646216
RGU294710N0922114E	RGS294710N0922114E	20181031	Google Earth	Complex	Talus-connected	Geomorphological	Relict	Extended	Mono-unit	0.0140626	0.126651	5007.45	4962	361.781	-0.176854	-1.50169	R1	N	16.4882	29.7721	92.2797
RGU295842N0922163E	RGS295842N0922163E	20181031	Google Earth	Simple	Talus-connected	Geomorphological	Transitional	Extended	Mono-unit	0.0048618	0.0183601	5251.1	5219	381.561	-0.334425	-3.14426	R1	W	20.9694	29.817	92.2801	0.000109352	0.000185709
RGU295843N0922171E	RGS295843N0922171E	20181031	Google Earth	Simple	Talus-connected	Geomorphological	Transitional	Extended	Mono-unit	0.00879597	0.0437335	5194.09	5127	362.252	-0.90248	-1.5516	R1	W	22.2686	29.7868	92.2776	0.000245986	0.00052621
RGU296146N0922120E	RGS297825N0922856E	20181031	Google Earth	Complex	Talus-connected	Geomorphological	Transitional	Extended	Multi-unit	0.027699	0.126958	5255.91	5194	365.175	-0.558257	-1.789	R1	SE	19.3957	29.7818	92.285	0.000814857	0.0018905
RGU296119N0922165E	RGS296119N0922165E	20181031	Google Earth	Simple	Talus-connected	Geomorphological	Transitional	Extended	Mono-unit	0.00673185	0.0299702	5218.4	5184	369.162	-0.19579	-1.81879	R1	W	23.9047	29.8409	92.2855	0.000157644	0.000334357
RGU296263N0922114E	RGS296263N0922114E	20181031	Google Earth	Simple	Talus-connected	Geomorphological	Relict	Extended	Mono-unit	0.00994784	0.0673365	5265.9	5220	381.132	0.10219	-3.14682	R1	E	19.1608	29.8068	92.2864
RGU297515N0922105E	RGS298362N0922845E	20181031	Google Earth	Simple	Talus-connected	Geomorphological	Transitional	Extended	Multi-unit	0.00949018	0.0366495	5278.33	5247	371.957	-0.3609	-2.15891	R1	NW	15.6749	29.8349	92.2875	0.00028913	0.000425662
RGU295605N0922132E	RGS298362N0922845E	20181031	Google Earth	Simple	Talus-connected	Geomorphological	Transitional	Extended	Multi-unit	0.0143624	0.0833881	5226.79	5137	369.67	-0.223598	-1.90748	R1	W	18.9585	29.836	92.2846	0.000547083	0.00114158
RGU295590N0922159E	RGS295590N0922159E	20181031	Google Earth	Complex	Talus-connected	Geomorphological	Transitional	Extended	Mono-unit	0.0143589	0.075603	5266.18	5215	369.171	-0.52423	-2.16214	R1	SW	22.6049	29.7878	92.2896	0.000419237	0.00101491
RGU295066N0922161E	RGS295066N0922161E	20181031	Google Earth	Simple	Talus-connected	Geomorphological	Relict	Extended	Mono-unit	0.00470655	0.0138712	5194.47	5158	381.932	-0.194705	-3.13662	R1	W	24.357	29.844	92.2879
RGU294932N0922183E	RGS294932N0922183E	20181031	Google Earth	Simple	Talus-connected	Geomorphological	Relict	Extended	Mono-unit	0.00709396	0.0189367	5307.81	5270	385.215	-0.17734	-3.32019	R1	S	28.2425	29.8464	92.2899
RGU295285N0922203E	RGS295285N0922203E	20181031	Google Earth	Complex	Talus-connected	Geomorphological	Relict	Extended	Mono-unit	0.0163179	0.0952125	5212.67	5149	366.708	-0.0725541	-1.84408	R1	NE	22.2161	29.7995	92.2923
RGU295588N0922195E	RGS295588N0922195E	20181031	Google Earth	Complex	Talus-connected	Geomorphological	Relict	Extended	Mono-unit	0.00976876	0.0471453	5167.21	5123	364.265	-0.30268	-1.74489	R1	W	24.1641	29.7774	92.2907
RGU296288N0922206E	RGS296288N0922206E	20181031	Google Earth	Simple	Talus-connected	Geomorphological	Relict	Extended	Mono-unit	0.00620977	0.0168111	5216.57	5190	366.091	-0.172022	-1.89083	R1	SW	15.8549	29.7799	92.2929
RGU295738N0922235E	RGS295738N0922235E	20181031	Google Earth	Complex	Talus-connected	Geomorphological	Relict	Extended	Mono-unit	0.0118897	0.0512308	5090.53	5064	362.719	0.0140489	-1.77532	R1	NW	17.5063	29.7566	92.2958
RGU295739N0922248E	RGS295739N0922248E	20181031	Google Earth	Complex	Talus-connected	Geomorphological	Transitional	Extended	Mono-unit	0.0250435	0.165877	5174.24	5088	365.423	-0.525457	-1.7948	R1	NE	15.1172	29.7823	92.3021	0.0013557	0.00260571
RGU295763N0922287E	RGS295763N0922287E	20181031	Google Earth	Complex	Talus-connected	Geomorphological	Transitional	Extended	Mono-unit	0.0124094	0.0709602	5293.58	5244	370.488	-0.62367	-2.25695	R1	NE	18.124	29.792	92.2919	0.000486212	0.000940591
RGU296106N0922284E	RGS296106N0922284E	20181031	Google Earth	Complex	Talus-connected	Geomorphological	Relict	Extended	Mono-unit	0.0211446	0.200528	5133.36	5042	369.597	-0.218595	-2.11276	R1	N	14.937	29.7985	92.2994
RGU296191N0922258E	RGS296191N0922258E	20181031	Google Earth	Complex	Talus-connected	Geomorphological	Transitional	Extended	Mono-unit	0.0371645	0.39637	5107.85	4964	364.594	0.266498	-1.46874	R1	NE	16.5343	29.8232	92.3055	0.00296865	0.00741145
RGU296170N0922240E	RGS296170N0922240E	20181031	Google Earth	Complex	Debris-mantled slope-connected	Geomorphological	Relict	Extended	Mono-unit	0.0138158	0.0860939	5123.72	5067	360.482	-0.040562	-1.45942	R1	N	14.4534	29.7685	92.3003
RGU296188N0922269E	RGS296188N0922269E	20181031	Google Earth	Simple	Debris-mantled slope-connected	Geomorphological	Relict	Extended	Mono-unit	0.00611923	0.024924	5058.17	5025	362.721	-0.040562	-1.66993	R1	NE	19.7815	29.7674	92.3035
RGU295554N0922352E	RGS295554N0922352E	20181031	Google Earth	Complex	Talus-connected	Geomorphological	Transitional	Extended	Mono-unit	0.0162291	0.133642	5211.15	5143	370.84	0.251764	-1.96652	R1	NE	17.1922	29.8384	92.3035	0.000963714	0.00201055
RGU295199N0922458E	RGS298503N0923106E	20181031	Google Earth	Complex	Talus-connected	Geomorphological	Transitional	Extended	Multi-unit	0.00859984	0.0349035	5206.07	5165	370.175	0.28958	-1.78828	R1	NE	19.2432	29.8509	92.31	0.000225728	0.000401444
RGU295231N0922453E	RGS298503N0923106E	20181031	Google Earth	Simple	Talus-connected	Geomorphological	Active	Extended	Multi-unit	0.0108873	0.0568913	5277.58	5226	375.095	0.304557	-2.32078	R1	NE	23.6616	29.8517	92.3088	0.000302145	0.000721502
RGU295862N0922279E	RGS298503N0923106E	20181031	Google Earth	Simple	Talus-connected	Geomorphological	Active	Extended	Multi-unit	0.00696121	0.0199497	5359.92	5334	379.785	0.302776	-2.73658	R1	NE	18.3886	29.8535	92.3056	0.000134793	0.000205166
RGU296770N0922137E	RGS296770N0922137E	20181031	Google Earth	Complex	Talus-connected	Geomorphological	Transitional	Extended	Mono-unit	0.01175	0.0312654	4992.14	4918	348.031	0.411791	-0.27122	R1	N	23.7085	29.7526	92.3023	0.000165739	0.000351771
RGU297653N0922240E	RGS297653N0922240E	20181031	Google Earth	Complex	Talus-connected	Geomorphological	Active	Extended	Mono-unit	0.0144743	0.0907419	5295.59	5251	370.84	0.0457172	-1.96652	R1	N	15.341	29.8344	92.3029	0.000731062	0.00126343
RGU297641N0922284E	RGS297641N0922284E	20181031	Google Earth	Simple	Talus-connected	Geomorphological	Relict	Extended	Mono-unit	0.00639458	0.0289161	5111.18	5079	371.175	-0.227385	-2.23116	R1	N	22.6707	29.7987	92.3029
RGU297595N0922343E	RGS297595N0922343E	20181031	Google Earth	Complex	Talus-connected	Geomorphological	Relict	Extended	Mono-unit	0.00988714	0.0494006	5116.71	5072	362.721	0.117101	-1.66993	R1	N	10.7957	29.7637	92.3053
RGU297716N0922429E	RGS297716N0922429E	20181031	Google Earth	Simple	Talus-connected	Geomorphological	Transitional	Extended	Mono-unit	0.00501344	0.0175871	5218.95	5164	365.298	-0.22408	-1.71212	R1	NW	32.3335	29.7955	92.3018	7.00876e-05	0.000176367
RGU297728N0922456E	RGS298004N0923064E	20181031	Google Earth	Simple	Talus-connected	Geomorphological	Transitional	Extended	Multi-unit	0.0201532	0.143332	5110.83	4959	371.09	-0.354725	-2.22598	R1	NW	22.4469	29.8032	92.3058	0.000800113	0.00218672
RGU298011N0922475E	RGS298004N0923064E	20181031	Google Earth	Complex	Talus-connected	Geomorphological	Relict	Extended	Multi-unit	0.00749113	0.0422013	5195.13	5170	370.261	-0.38768	-2.14132	R1	NE	13.8552	29.797	92.3073
RGU298035N0922467E	RGS298035N0922467E	20181031	Google Earth	Complex	Talus-connected	Geomorphological	Transitional	Extended	Mono-unit	0.0095159	0.0440398	5109.84	5066	364.736	-0.43959	-1.71377	R1	NW	20.1779	29.7827	92.3068	0.000272134	0.000530637
RGU298053N0922462E	RGS298053N0922462E	20181031	Google Earth	Complex	Talus-connected	Geomorphological	Transitional	Extended	Mono-unit	0.0344628	0.464769	5132.39	5070	372.648	0.210105	-2.10079	R1	NW	13.3283	29.8432	92.3103	0.00429719	0.00897153
RGU298050N0922535E	RGS298050N0922535E	20181031	Google Earth	Complex	Talus-connected	Geomorphological	Transitional	Extended	Mono-unit	0.00918432	0.0315076	5007.39	4979	356.524	-0.317159	-0.848516	R1	NE	24.7381	29.7822	92.3113	0.000160482	0.000355043
RGU298055N0922599E	RGS298055N0922599E	20181031	Google Earth	Complex	Talus-connected	Geomorphological	Relict	Extended	Mono-unit	0.014208	0.0545494	4945.06	4856	343.672	0.26398	0.269575	R1	N	21.913	29.7668	92.3115
RGU297962N0922528E	RGS297962N0922528E	20181031	Google Earth	Simple	Debris-mantled slope-connected	Geomorphological	Relict	Extended	Mono-unit	0.00621836	0.0216632	5209.45	5187	364.472	-0.43959	-1.58359	R1	NE	20.304	29.7897	92.3118
RGU297859N0922548E	RGS297859N0922548E	20181031	Google Earth	Complex	Debris-mantled slope-connected	Geomorphological	Relict	Extended	Mono-unit	0.0051212	0.010512	5179.29	5168	364.472	-0.43959	-1.58359	R1	NE	17.4963	29.7894	92.3133
RGU297868N0922576E	RGS297868N0922576E	20181031	Google Earth	Complex	Talus-connected	Geomorphological	Relict	Extended	Mono-unit	0.0187389	0.105946	5097.08	5029	364.137	-0.1627	-1.52842	R1	NE	17.8486	29.789	92.3198
RGU297702N0922579E	RGS297702N0922579E	20181031	Google Earth	Complex	Talus-connected	Geomorphological	Relict	Extended	Mono-unit	0.0178278	0.0949196	5119.3	4998	368.045	-0.345779	-1.8725	R1	NW	17.7856	29.8051	92.3105
RGU297338N0922606E	RGS297338N0922606E	20181031	Google Earth	Complex	Debris-mantled slope-connected	Geomorphological	Relict	Extended	Mono-unit	0.0105173	0.0375325	4644.05	4607	337.68	0.59683	0.684158	R1	W	18.2547	29.7397	92.3128
RGU297620N0922597E	RGS298687N0923151E	20181031	Google Earth	Simple	Talus-connected	Geomorphological	Relict	Extended	Multi-unit	0.0318893	0.16535	4997.78	4723	377.725	0.876363	-2.44297	R1	NE	17.7362	29.8686	92.3154
RGU297551N0922683E	RGS298687N0923151E	20181031	Google Earth	Simple	Talus-connected	Geomorphological	Relict	Extended	Multi-unit	0.0144354	0.0815981	5112.3	5043	376.168	0.316479	-2.31802	R1	NE	11.9291	29.8633	92.3124
RGU296072N0922373E	RGS298687N0923151E	20181031	Google Earth	Complex	Talus-connected	Geomorphological	Transitional	Extended	Multi-unit	0.0108411	0.0564503	5199.28	5148	368.938	0.36216	-1.62373	R1	NE	16.3514	29.8591	92.3119	0.000427386	0.000714795
RGU297719N0922621E	RGS298687N0923151E	20181031	Google Earth	Complex	Talus-connected	Geomorphological	Transitional	Extended	Multi-unit	0.0104781	0.0660146	5330.42	5267	379.605	0.36216	-2.72833	R1	N	17.1515	29.859	92.3075	0.000477135	0.000862482
RGU297685N0922627E	RGS297685N0922627E	20100310	Google Earth	Complex	Talus-connected	Geomorphological	Active	Extended	Mono-unit	0.0103153	0.0675051	5122.63	5076	351.37	-0.23121	-2.44171	R1	NW	18.8282	29.5369	92.1812	0.000445833	0.000885904
RGU297721N0922648E	RGS297721N0922648E	20181031	Google Earth	Simple	Debris-mantled slope-connected	Geomorphological	Relict	Extended	Mono-unit	0.012975	0.0903535	5038.99	4974	370.182	0.59087	-1.74004	R1	N	14.5176	29.8516	92.3194
RGU297236N0922672E	RGS297236N0922672E	20181031	Google Earth	Complex	Debris-mantled slope-connected	Geomorphological	Relict	Extended	Mono-unit	0.00885615	0.0460423	5124.55	5078	371.116	-0.173346	-2.09299	R1	N	17.2752	29.8082	92.3236
RGU297224N0922682E	RGS297224N0922682E	20181031	Google Earth	Simple	Debris-mantled slope-connected	Geomorphological	Transitional	Extended	Mono-unit	0.00469554	0.0170604	5146.86	5124	371.116	0.57496	-2.09299	R1	NW	23.2037	29.8069	92.3261	9.22928e-05	0.000170048
RGU297189N0922707E	RGS297189N0922707E	20181031	Google Earth	Complex	Talus-connected	Geomorphological	Relict	Extended	Mono-unit	0.0127374	0.0899962	4824.8	4784	367.281	0.713292	-1.51513	R1	NW	18.3323	29.8356	92.3243
RGU297196N0922704E	RGS297196N0922704E	20181031	Google Earth	Complex	Talus-connected	Geomorphological	Relict	Extended	Mono-unit	0.00902932	0.0375835	4958.47	4938	365.216	0.69668	-1.21572	R1	N	14.0848	29.8531	92.3234
RGU297205N0922710E	RGS297205N0922710E	20181031	Google Earth	Simple	Debris-mantled slope-connected	Geomorphological	Transitional	Extended	Mono-unit	0.0109963	0.0600391	5161.42	5079	376.151	1.1078	-2.28163	R1	NE	22.6568	29.8655	92.3192	0.00033221	0.000769669
RGU298194N0922806E	RGS298194N0922806E	20181031	Google Earth	Complex	Debris-mantled slope-connected	Geomorphological	Relict	Extended	Mono-unit	0.0213862	0.203428	5110.75	4989	364.068	0.57362	-1.36232	R1	E	12.4598	29.8063	92.3327
RGU297267N0922766E	RGS297267N0922766E	20181031	Google Earth	Simple	Talus-connected	Geomorphological	Transitional	Extended	Mono-unit	0.00480849	0.0128613	5123.47	5108	368.068	0.59694	-1.74331	R1	SE	12.9415	29.8096	92.3314	0.000122404	0.00012115
RGU297721N0922797E	RGS297721N0922797E	20181031	Google Earth	Complex	Talus-connected	Geomorphological	Transitional	Extended	Mono-unit	0.0200844	0.186594	4880.96	4836	358.848	0.0085999	-0.90922	R1	NW	11.3092	29.7849	92.36	0.00202809	0.00300095
RGU297219N0922790E	RGS297219N0922790E	20181031	Google Earth	Complex	Talus-connected	Geomorphological	Transitional	Extended	Mono-unit	0.0175382	0.0523549	4908.14	4881	361.471	0.310654	-1.09125	R1	N	17.6311	29.7921	92.3663	0.000368427	0.000653027
RGU298334N0922789E	RGS298334N0922789E	20181031	Google Earth	Complex	Talus-connected	Geomorphological	Transitional	Extended	Mono-unit	0.00774689	0.0185214	4935.24	4919	363.5	0.24897	-1.28284	R1	N	21.841	29.7927	92.3703	0.000106113	0.000187668
RGU298068N0922864E	RGS298068N0922864E	20181031	Google Earth	Simple	Debris-mantled slope-connected	Geomorphological	Relict	Extended	Mono-unit	0.00596057	0.0208952	4864.65	4826	362.046	0.49204	-1.09524	R1	NE	20.643	29.7756	92.4038
RGU298349N0922875E	RGS298349N0922875E	20181031	Google Earth	Complex	Debris-mantled slope-connected	Geomorphological	Relict	Extended	Mono-unit	0.00694259	0.0133603	5043.44	5011	361.732	0.37876	-1.06762	R1	N	28.5828	29.771	92.4025
RGU297878N0922896E	RGS297878N0922896E	20181031	Google Earth	Complex	Talus-connected	Geomorphological	Relict	Extended	Mono-unit	0.0220017	0.091376	4829.14	4776	353.065	0.71483	-0.357093	R1	NE	20.0954	29.7517	92.4046
RGU298440N0922879E	RGS298440N0922879E	20181031	Google Earth	Simple	Talus-connected	Geomorphological	Relict	Extended	Mono-unit	0.00416204	0.0100733	4919.3	4906	355.519	0.58207	-0.693923	R1	N	20.725	29.7528	92.3912
RGU298464N0922899E	RGS298464N0922899E	20181031	Google Earth	Simple	Debris-mantled slope-connected	Geomorphological	Relict	Extended	Mono-unit	0.00724993	0.0224014	5019.78	4980	372.941	0.45726	-1.77402	R1	NW	19.5988	29.849	92.3818
RGU297995N0922923E	RGS297995N0922923E	20181031	Google Earth	Complex	Talus-connected	Geomorphological	Transitional	Extended	Mono-unit	0.0054195	0.0188514	5084.57	5060	372.941	0.38146	-1.77402	R1	N	21.2804	29.8431	92.3881	0.000110712	0.000191688
RGU297774N0922907E	RGS298289N0923944E	20181031	Google Earth	Complex	Talus-connected	Geomorphological	Relict	Extended	Multi-unit	0.0187905	0.115609	5081.44	4997	371.598	0.195045	-1.73575	R1	N	18.4786	29.8283	92.3963
RGU297799N0922929E	RGS298289N0923944E	20181031	Google Earth	Complex	Talus-connected	Geomorphological	Relict	Extended	Multi-unit	0.00622411	0.0104531	5058.67	5028	371.598	0.174055	-1.73575	R1	N	19.7926	29.8287	92.3939
RGU297566N0922958E	RGS298289N0923944E	20181031	Google Earth	Complex	Talus-connected	Geomorphological	Relict	Extended	Multi-unit	0.0124478	0.0812911	5065.22	5011	370.879	0.182128	-1.66889	R1	N	15.3374	29.829	92.3926
RGU297823N0923021E	RGS297823N0923021E	20181031	Google Earth	Simple	Debris-mantled slope-connected	Geomorphological	Transitional	Extended	Mono-unit	0.00461133	0.0142538	5155.94	5107	366.084	0.169755	-1.23684	R1	NE	28.7191	29.8272	92.3893	6.32266e-05	0.000137057
RGU297920N0922919E	RGS297920N0922919E	20181031	Google Earth	Complex	Talus-connected	Geomorphological	Relict	Extended	Mono-unit	0.0183154	0.0809202	4984.89	4950	364.456	0.585707	-0.915444	R1	NW	15.4809	29.8377	92.4
RGU297730N0922987E	RGS297730N0922987E	20181031	Google Earth	Complex	Talus-connected	Geomorphological	Transitional	Extended	Mono-unit	0.0123381	0.0686165	5032.35	4995	366.555	0.25653	-1.21996	R1	N	15.9264	29.8189	92.4176	0.000532986	0.000903434
RGU297985N0922994E	RGS297985N0922994E	20181031	Google Earth	Complex	Talus-connected	Geomorphological	Transitional	Extended	Mono-unit	0.0219039	0.161718	5058.15	4998	370.998	-0.0598031	-1.70369	R1	N	13.8842	29.8084	92.414	0.00143646	0.00252751
RGU297685N0923003E	RGS297685N0923003E	20181031	Google Earth	Complex	Talus-connected	Geomorphological	Relict	Extended	Mono-unit	0.0172527	0.0616034	5016.5	4965	365.758	0.061041	-1.14624	R1	NE	17.581	29.8071	92.4248
RGU297674N0923035E	RGS297674N0923035E	20181031	Google Earth	Complex	Talus-connected	Geomorphological	Transitional	Extended	Mono-unit	0.00538427	0.0193175	5013.95	4984	363.534	0.21082	-0.913591	R1	NE	21.9357	29.8062	92.431	0.00011022	0.000197389
RGU298509N0923100E	RGS298509N0923100E	20181031	Google Earth	Complex	Debris-mantled slope-connected	Geomorphological	Relict	Extended	Mono-unit	0.00731216	0.0280377	5124.7	5079	363.04	-0.111322	-0.879933	R1	NW	18.9019	29.7963	92.4397
RGU298535N0923056E	RGS298535N0923056E	20181031	Google Earth	Complex	Talus-connected	Geomorphological	Relict	Extended	Mono-unit	0.0125907	0.0691168	4927.29	4910	354.849	0.209275	-0.264018	R1	NW	14.466	29.781	92.4277
RGU297526N0923023E	RGS297526N0923023E	20181031	Google Earth	Complex	Debris-mantled slope-connected	Geomorphological	Relict	Extended	Mono-unit	0.0094517	0.0168156	5068.15	5007	360.053	0.0849595	-0.751128	R1	N	21.1793	29.7782	92.4373
RGU298344N0923029E	RGS298344N0923029E	20181031	Google Earth	Simple	Talus-connected	Geomorphological	Relict	Extended	Mono-unit	0.0039887	0.0105347	4937.54	4922	360.409	0.41422	-0.872447	R1	W	19.2691	29.768	92.4421
RGU297987N0923029E	RGS297987N0923029E	20181031	Google Earth	Simple	Talus-connected	Geomorphological	Relict	Extended	Mono-unit	0.00419653	0.0107988	4938.64	4929	362.588	0.41422	-1.20325	R1	SW	12.7182	29.7695	92.4431
RGU297637N0923053E	RGS297637N0923053E	20181031	Google Earth	Complex	Talus-connected	Geomorphological	Relict	Extended	Mono-unit	0.00545987	0.0130772	4948.75	4932	360.334	0.41422	-0.752351	R2	NW	22.7623	29.7716	92.4449
RGU297955N0923018E	RGS297955N0923018E	20181031	Google Earth	Complex	Debris-mantled slope-connected	Geomorphological	Relict	Extended	Mono-unit	0.00960053	0.0358775	4773.74	4718	360.633	0.60357	-1.06389	R1	N	24.2702	29.7391	92.4379
RGU297970N0923073E	RGS297970N0923073E	20181031	Google Earth	Simple	Debris-mantled slope-connected	Geomorphological	Relict	Extended	Mono-unit	0.00474532	0.0140111	4949.61	4936	362.705	0.140659	-1.50571	R1	NW	17.122	29.719	92.4238
RGU297827N0923068E	RGS297827N0923068E	20181031	Google Earth	Simple	Debris-mantled slope-connected	Geomorphological	Active	Extended	Mono-unit	0.00502332	0.0177585	5067.76	5049	359.113	0.18724	-1.26853	R1	N	18.619	29.7113	92.4197	0.000118554	0.000178431
RGU298432N0923103E	RGS298432N0923103E	20100310	Google Earth	Complex	Debris-mantled slope-connected	Geomorphological	Relict	Extended	Mono-unit	0.0121211	0.0634702	5030.35	4997	352.013	-0.082588	-1.95197	R1	N	15.8058	29.4717	92.4368
RGU297743N0923104E	RGS297743N0923104E	20100310	Google Earth	Simple	Debris-mantled slope-connected	Geomorphological	Relict	Extended	Mono-unit	0.00399522	0.0115587	5167.14	5141	353.258	-0.3671	-1.89065	R2	N	23.5304	29.4814	92.4498
RGU297822N0923113E	RGS297822N0923113E	20100310	Google Earth	Complex	Debris-mantled slope-connected	Geomorphological	Relict	Extended	Mono-unit	0.0348226	0.347705	5049.3	4963	353.296	-0.065414	-1.93421	R1	N	13.9557	29.485	92.4388
RGU297668N0923115E	RGS297668N0923115E	20100310	Google Earth	Complex	Debris-mantled slope-connected	Geomorphological	Active	Extended	Mono-unit	0.0218844	0.157396	5072.96	5008	350.684	-0.18816	-1.51221	R1	N	13.3342	29.528	92.4418	0.00145463	0.00244666
RGU297897N0923118E	RGS297897N0923118E	20100310	Google Earth	Simple	Debris-mantled slope-connected	Geomorphological	Active	Extended	Mono-unit	0.00649133	0.0230685	5151.41	5117	359.18	-0.407836	-2.08079	R2	NW	22.5784	29.5522	92.4498	0.000128063	0.000244234
RGU297894N0923133E	RGS297894N0923133E	20100310	Google Earth	Complex	Debris-mantled slope-connected	Geomorphological	Active	Extended	Mono-unit	0.00816393	0.0235703	5207.55	5191	359.18	-0.528701	-2.08079	R2	SW	16.1902	29.5465	92.4458	0.000180179	0.000250622
RGU297890N0923198E	RGS297890N0923198E	20181114	Google Earth	Simple	Debris-mantled slope-connected	Geomorphological	Transitional	Extended	Mono-unit	0.0045355	0.0124592	5257.15	5246	367.948	-0.62183	-2.81207	R2	N	8.30967	29.4817	92.5382	0.00018375	0.000116619
RGU298051N0923105E	RGS298051N0923105E	20181114	Google Earth	Simple	Talus-connected	Geomorphological	Transitional	Extended	Mono-unit	0.00543514	0.0225474	5249.77	5227	360.725	-0.62183	-2.18881	R2	E	15.7639	29.4832	92.5374	0.000176898	0.000237629
RGU297397N0923128E	RGS297397N0923128E	20181114	Google Earth	Complex	Talus-connected	Geomorphological	Transitional	Extended	Mono-unit	0.00555949	0.0164975	5265.21	5239	361.163	-0.62183	-2.21883	R2	N	17.0632	29.4817	92.5369	0.000119838	0.000163337
RGU298686N0923154E	RGS298686N0923154E	20181114	Google Earth	Complex	Debris-mantled slope-connected	Geomorphological	Transitional	Extended	Mono-unit	0.0108846	0.0611491	5303.5	5266	363.566	-0.62183	-2.41238	R2	NE	10.2453	29.4805	92.5372	0.000732794	0.000786776
RGU298633N0923124E	RGS298633N0923124E	20181114	Google Earth	Simple	Talus-connected	Geomorphological	Active	Extended	Mono-unit	0.00694231	0.0250103	5323.71	5305	363.353	-0.62183	-2.38205	R2	E	13.697	29.4789	92.5352	0.000225132	0.000269107
RGU298591N0923119E	RGS298591N0923119E	20181114	Google Earth	Simple	Debris-mantled slope-connected	Geomorphological	Transitional	Extended	Mono-unit	0.00519867	0.0157515	5348.95	5321	363.912	-0.62183	-2.47784	R2	W	20.5998	29.4777	92.5367	9.54235e-05	0.000154514
RGU298590N0923075E	RGS298590N0923075E	20181114	Google Earth	Simple	Talus-connected	Geomorphological	Transitional	Extended	Mono-unit	0.00421111	0.0137282	5261.25	5254	368.541	-0.62183	-2.76855	R2	SW	10.4613	29.4814	92.5392	0.000161153	0.000131014
RGU295369N0921812E	RGS295369N0921812E	20191031	Google Earth	Complex	Talus-connected	Geomorphological	Transitional	Extended	Mono-unit	0.00958563	0.055608	5286.81	5265	384.477	-0.069271	-2.9977	R2	NE	12.5129	29.7328	92.5183	0.000547061	0.000702016
RGU298516N0923194E	RGS298516N0923194E	20120109	Google Earth	Simple	Debris-mantled slope-connected	Geomorphological	Active	Extended	Mono-unit	0.0069756	0.0326722	5066.43	5015	351.635	0.038215	-2.02956	R2	NE	21.7969	29.3989	92.4839	0.000187546	0.000370848
RGU298082N0923236E	RGS298082N0923236E	20090216	Google Earth	Complex	Talus-connected	Geomorphological	Active	Extended	Mono-unit	0.0154698	0.134597	4807.6	4706	336.449	-0.96895	-1.0228	R2	N	24.9802	29.3721	92.4556	0.00067934	0.00202781
RGU293989N0924839E	RGS293989N0924839E	20120109	Google Earth	Complex	Debris-mantled slope-connected	Geomorphological	Relict	Extended	Mono-unit	0.0116119	0.0670869	4985.22	4921	339.83	-1.1325	-1.19521	R2	E	21.1556	29.3548	92.4679
RGU293721N0924556E	RGS293721N0924556E	20120109	Google Earth	Complex	Talus-connected	Geomorphological	Transitional	Extended	Mono-unit	0.0117532	0.0931266	5014.51	4943	342.117	-1.1325	-1.45867	R2	N	17.8826	29.3515	92.4685	0.000646422	0.00130338
RGU293548N0924679E	RGS293548N0924679E	20120109	Google Earth	Complex	Glacier forefield-connected	Geomorphological	Relict	Extended	Mono-unit	0.0125488	0.118876	5084.65	5015	342.117	-1.05766	-1.45867	R2	NE	20.3716	29.3484	92.4689
RGU293515N0924685E	RGS293515N0924685E	20120109	Google Earth	Simple	Debris-mantled slope-connected	Geomorphological	Active	Extended	Mono-unit	0.00619494	0.0261831	5095.3	5039	349.066	-1.0215	-2.08042	R2	N	25.6257	29.3453	92.4703	0.000129039	0.000284321
RGU293484N0924689E	RGS293484N0924689E	20120109	Google Earth	Complex	Glacier forefield-connected	Geomorphological	Active	Extended	Mono-unit	0.00941437	0.0554098	5076.71	5037	349.529	-1.2202	-2.10358	R2	W	14.4237	29.3451	92.4738	0.000474139	0.000699015
RGU293453N0924703E	RGS293599N0924736E	20090216	Google Earth	Complex	Glacier forefield-connected	Geomorphological	Active	Extended	Multi-unit	0.0199038	0.128508	5186.66	4997	339.743	-1.32166	-1.25259	R2	W	24.3857	29.3604	92.4752	0.000663415	0.00191822
RGU293451N0924738E	RGS293599N0924736E	20090216	Google Earth	Complex	Talus-connected	Geomorphological	Active	Extended	Multi-unit	0.0147418	0.137843	5303.94	5239	356.14	-1.3241	-2.53712	R2	SW	13.8282	29.3635	92.4786	0.00122925	0.00208662
RGU293604N0924752E	RGS293604N0924752E	20120109	Google Earth	Complex	Debris-mantled slope-connected	Geomorphological	Active	Extended	Mono-unit	0.0115086	0.0852264	5352.08	5295	349.107	-0.86569	-1.90063	R2	N	24.866	29.3731	92.4746	0.000432003	0.00117185
RGU293635N0924786E	RGS293635N0924786E	20120109	Google Earth	Complex	Talus-connected	Geomorphological	Active	Extended	Mono-unit	0.0138878	0.0711329	5177.31	5115	354.844	-0.739247	-2.33866	R2	NE	20.2299	29.3775	92.4677	0.000438467	0.000943338
RGU293731N0924746E	RGS293731N0924746E	20120109	Google Earth	Simple	Debris-mantled slope-connected	Geomorphological	Relict	Extended	Mono-unit	0.0133041	0.0559358	4969.3	4850	337.421	-0.687643	-1.04217	R2	W	22.8896	29.3825	92.462
RGU293775N0924677E	RGS293775N0924677E	20120109	Google Earth	Simple	Talus-connected	Geomorphological	Active	Extended	Mono-unit	0.00535629	0.0199466	4937.68	4913	341.432	-0.76012	-1.47671	R2	SW	21.8075	29.3649	92.4521	0.000114446	0.000205129
RGU293825N0924620E	RGS293807N0924785E	20120109	Google Earth	Complex	Glacier forefield-connected	Geomorphological	Active	Extended	Multi-unit	0.0155315	0.151693	5278.35	5237	356.449	-0.704915	-2.51195	R2	N	14.797	29.3765	92.4818	0.00126599	0.00234068
RGU293649N0924521E	RGS293807N0924785E	20120109	Google Earth	Complex	Talus-connected	Geomorphological	Active	Extended	Multi-unit	0.0116934	0.0581482	5178.54	5126	357.223	-0.60423	-2.5397	R2	W	18.4475	29.3817	92.4794	0.000391675	0.000740672
RGU293765N0924818E	RGS293807N0924785E	20120109	Google Earth	Complex	Debris-mantled slope-connected	Geomorphological	Active	Extended	Multi-unit	0.00620504	0.0164385	5251.95	5238	356.449	-0.666317	-2.51195	R2	SW	20.1494	29.379	92.4821	0.000101715	0.000162636
RGU293817N0924794E	RGS293807N0924785E	20120109	Google Earth	Complex	Talus-connected	Geomorphological	Active	Extended	Multi-unit	0.0169866	0.0998262	5232.84	5161	356.449	-0.640211	-2.51195	R2	NE	20.4322	29.3782	92.4788	0.000609498	0.00141669
RGU293790N0924821E	RGS293807N0924785E	20120109	Google Earth	Complex	Talus-connected	Geomorphological	Active	Extended	Multi-unit	0.00659354	0.0269897	5234.03	5184	356.449	-0.60423	-2.51195	R2	NE	29.1438	29.3803	92.477	0.000118125	0.000294862
RGU293782N0924788E	RGS293782N0924788E	20120109	Google Earth	Simple	Debris-mantled slope-connected	Geomorphological	Transitional	Extended	Mono-unit	0.00992643	0.0371896	5126.04	5041	342.312	-0.226861	-1.35418	R2	W	25.7178	29.3943	92.476	0.000182671	0.0004332
RGU293943N0924760E	RGS293943N0924760E	20120109	Google Earth	Complex	Debris-mantled slope-connected	Geomorphological	Relict	Extended	Mono-unit	0.00794631	0.0275738	4881.61	4841	342.699	-0.25682	-1.39886	R2	W	17.2224	29.387	92.4598
RGU293976N0924729E	RGS293274N0924501E	20120109	Google Earth	Complex	Talus-connected	Geomorphological	Active	Extended	Multi-unit	0.00916283	0.0422508	5254.88	5225	362.273	-0.480347	-3.23107	R2	NW	18.4645	29.3271	92.4502	0.000284342	0.000504876
RGU293870N0924598E	RGS293274N0924501E	20120109	Google Earth	Complex	Talus-connected	Geomorphological	Active	Extended	Multi-unit	0.00400781	0.0105149	5283.77	5266	362.423	-0.37163	-3.25892	R2	W	16.5704	29.327	92.452	7.85854e-05	9.51367e-05
RGU293271N0924502E	RGS293271N0924502E	20120109	Google Earth	Complex	Talus-connected	Geomorphological	Active	Extended	Mono-unit	0.00479575	0.0154625	5361.94	5332	360.076	-0.37163	-3.05604	R2	W	30.2311	29.3286	92.4535	6.54586e-05	0.000151119
RGU293270N0924520E	RGS293270N0924520E	20120109	Google Earth	Complex	Glacier forefield-connected	Geomorphological	Active	Extended	Mono-unit	0.00790197	0.0483888	5317.2	5284	360.076	-0.505916	-3.05604	R2	SW	15.134	29.33	92.4518	0.000395049	0.000594123
RGU293286N0924535E	RGS293286N0924535E	20200818	Google Earth	Complex	Debris-mantled slope-connected	Geomorphological	Active	Extended	Mono-unit	0.00740337	0.033024	5316.11	5269	326.61	0.00893889	-0.470986	R2	W	30.0292	29.2979	92.4514	0.000140654	0.000375645
RGU293300N0924518E	RGS293300N0924518E	20090216	Google Earth	Complex	Glacier forefield-connected	Geomorphological	Active	Extended	Mono-unit	0.0162153	0.113009	5305.67	5208	346.064	-0.0979519	-2.03802	R2	W	20.3587	29.3027	92.4502	0.00069237	0.00164405
RGU292979N0924514E	RGS292979N0924514E	20090216	Google Earth	Complex	Talus-connected	Geomorphological	Active	Extended	Mono-unit	0.0146881	0.0990283	5360.38	5303	337.577	0.12974	-1.32887	R2	SE	20.8166	29.3152	92.4533	0.000593944	0.00140312
RGU293027N0924502E	RGS293027N0924502E	20090216	Google Earth	Simple	Debris-mantled slope-connected	Geomorphological	Active	Extended	Mono-unit	0.0159935	0.140136	5048.81	4978	340.81	1.09617	-1.3781	R2	S	18.0312	29.3008	92.477	0.00096498	0.00212835
RGU293152N0924533E	RGS293152N0924533E	20090216	Google Earth	Simple	Debris-mantled slope-connected	Geomorphological	Active	Extended	Mono-unit	0.0103145	0.0591948	5129.13	5017	347.28	1.09966	-2.01784	R2	E	30.3993	29.2991	92.474	0.000249338	0.000756698
RGU293008N0924770E	RGS293008N0924770E	20090216	Google Earth	Complex	Glacier forefield-connected	Geomorphological	Active	Extended	Mono-unit	0.0146978	0.117769	5036.29	4918	332.395	0.74508	-0.830922	R2	E	21.0963	29.3108	92.4691	0.000697398	0.00172751
RGU292991N0924740E	RGS292991N0924740E	20090216	Google Earth	Complex	Glacier forefield-connected	Geomorphological	Active	Extended	Mono-unit	0.0220417	0.186446	5119.68	4934	350.165	0.75187	-2.27335	R2	NE	25.336	29.307	92.4681	0.00092867	0.0029981
RGU293108N0924691E	RGS293108N0924691E	20090216	Google Earth	Simple	Debris-mantled slope-connected	Geomorphological	Active	Extended	Mono-unit	0.00728957	0.0322199	4982.05	4938	330.474	-0.012197	-0.641899	R2	N	21.4745	29.3153	92.4678	0.000187592	0.000364696
RGU293070N0924681E	RGS293070N0924681E	20090216	Google Earth	Complex	Glacier forefield-connected	Geomorphological	Active	Extended	Mono-unit	0.0117707	0.0661565	5072.61	5043	358.347	-0.52014	-2.98041	R2	E	17.3469	29.3252	92.4659	0.000472938	0.000864708
RGU293153N0924678E	RGS293153N0924678E	20090216	Google Earth	Simple	Talus-connected	Geomorphological	Active	Extended	Mono-unit	0.00973693	0.0501153	5202.71	5140	351.213	-0.69299	-2.28593	R2	E	20.4027	29.3335	92.4638	0.000306407	0.000619651
RGU293252N0924659E	RGS293252N0924659E	20090216	Google Earth	Simple	Talus-connected	Geomorphological	Active	Extended	Mono-unit	0.00837557	0.0453984	5173.22	5140	351.213	-0.678586	-2.28593	R2	E	19.1483	29.3313	92.4638	0.000295001	0.00055034
RGU293335N0924638E	RGS293335N0924638E	20090216	Google Earth	Simple	Talus-connected	Geomorphological	Active	Extended	Mono-unit	0.00628383	0.0304735	5108.47	5068	351.213	-0.52014	-2.28593	R2	E	24.2164	29.329	92.4652	0.000158351	0.000341106
RGU293313N0924638E	RGS293313N0924638E	20090216	Google Earth	Simple	Talus-connected	Geomorphological	Active	Extended	Mono-unit	0.00806657	0.022752	5278.81	5215	351.869	-0.69299	-2.30887	R2	SE	27.4264	29.3354	92.4641	0.000105284	0.000240218
RGU293290N0924652E	RGS293290N0924652E	20090216	Google Earth	Simple	Debris-mantled slope-connected	Geomorphological	Active	Extended	Mono-unit	0.00795766	0.0292032	5241.21	5161	354.258	-0.69299	-2.49239	R2	SE	26.4979	29.3363	92.4651	0.000139512	0.000324116
RGU293354N0924641E	RGS293354N0924641E	20090216	Google Earth	Complex	Glacier forefield-connected	Geomorphological	Active	Extended	Mono-unit	0.0254067	0.240616	5169.63	5072	344.177	-0.681943	-1.67822	R2	S	10.6223	29.3349	92.4702	0.00278225	0.00407167
RGU293363N0924651E	RGS293363N0924651E	20090216	Google Earth	Complex	Debris-mantled slope-connected	Geomorphological	Active	Extended	Mono-unit	0.0126626	0.0857139	5346.83	5284	347.264	-0.51601	-1.9225	R2	SW	22.5751	29.3363	92.4747	0.0004759	0.0011799
RGU293349N0924702E	RGS293349N0924702E	20090216	Google Earth	Complex	Debris-mantled slope-connected	Geomorphological	Active	Extended	Mono-unit	0.00984805	0.048958	5261.05	5178	342.681	-0.51601	-1.56508	R2	W	24.83	29.3328	92.4747	0.0002485	0.00060252
RGU293363N0924747E	RGS293363N0924747E	20090216	Google Earth	Complex	Talus-connected	Geomorphological	Active	Extended	Mono-unit	0.015219	0.12847	5383.06	5326	360.459	-0.147186	-2.91669	R2	SW	15.7382	29.3321	92.4818	0.00100953	0.00191754
RGU293328N0924747E	RGS293328N0924747E	20120109	Google Earth	Complex	Talus-connected	Geomorphological	Active	Extended	Mono-unit	0.016629	0.0947119	5064.61	4968	342.928	0.0857809	-1.54264	R2	W	24.7037	29.3209	92.4761	0.000483038	0.00133005
RGU293321N0924818E	RGS293321N0924818E	20120109	Google Earth	Complex	Talus-connected	Geomorphological	Active	Extended	Mono-unit	0.0106148	0.0625399	5090.91	5059	332.989	0.406924	-0.723276	R2	W	14.7691	29.3188	92.4812	0.000522906	0.000808298
RGU293209N0924761E	RGS293209N0924761E	20200818	Google Earth	Complex	Talus-connected	Geomorphological	Relict	Extended	Mono-unit	0.0202681	0.15473	4761.31	4635	330.512	1.0935	-0.633207	R2	N	26.1569	29.2894	92.4833
RGU293188N0924812E	RGS293188N0924812E	20200818	Google Earth	Complex	Talus-connected	Geomorphological	Active	Extended	Mono-unit	0.00976906	0.0599514	5313.56	5264	347.28	1.1738	-2.01784	R2	E	22.0395	29.2966	92.4681	0.000340533	0.00076832
RGU292894N0924833E	RGS292894N0924833E	20200818	Google Earth	Simple	Glacier forefield-connected	Geomorphological	Active	Extended	Mono-unit	0.0106674	0.0777809	5368.18	5287	347.28	1.1738	-2.01774	R2	E	24.5278	29.2993	92.4686	0.000399356	0.0010501
RGU292966N0924681E	RGS292966N0924681E	20200818	Google Earth	Simple	Debris-mantled slope-connected	Geomorphological	Active	Extended	Mono-unit	0.0109796	0.0610926	4946.88	4846	321.508	1.537	0.152611	R2	E	28.1549	29.2809	92.4764	0.000275965	0.000785902
RGU292993N0924686E	RGS292993N0924686E	20200818	Google Earth	Simple	Debris-mantled slope-connected	Geomorphological	Active	Extended	Mono-unit	0.0125216	0.0712863	5194.25	5103	336.131	0.446699	-1.18975	R2	NW	25.8807	29.2846	92.4592	0.000348097	0.00094578
RGU292809N0924764E	RGS292809N0924764E	20200818	Google Earth	Simple	Debris-mantled slope-connected	Geomorphological	Active	Extended	Mono-unit	0.00850165	0.0420766	5005	4908	326.86	0.41511	-0.436579	R2	N	26.2592	29.2831	92.4541	0.000202707	0.000502379
RGU292846N0924592E	RGS292846N0924592E	20200818	Google Earth	Simple	Debris-mantled slope-connected	Geomorphological	Active	Extended	Mono-unit	0.00849014	0.0475641	4956.64	4906	330.159	0.380086	-0.699692	R2	N	24.7199	29.2832	92.4515	0.000242431	0.000581993
RGU292831N0924541E	RGS292831N0924541E	20200818	Google Earth	Simple	Debris-mantled slope-connected	Geomorphological	Active	Extended	Mono-unit	0.00699219	0.0277476	5324.66	5288	345.574	0.65033	-1.7082	R2	S	21.822	29.2969	92.4564	0.000159104	0.000304827
RGU292832N0924515E	RGS292832N0924515E	20200818	Google Earth	Simple	Debris-mantled slope-connected	Geomorphological	Active	Extended	Mono-unit	0.00826013	0.0425566	5286.81	5229	349.391	0.19203	-2.19948	R2	W	24.5438	29.2917	92.4612	0.000218367	0.000509264
RGU292969N0924564E	RGS292969N0924564E	20200818	Google Earth	Simple	Debris-mantled slope-connected	Geomorphological	Active	Extended	Mono-unit	0.00607184	0.0218189	5372.31	5323	357.164	0.855166	-2.87264	R2	SW	26.004	29.2965	92.4616	0.000106073	0.000228445
RGU292917N0924612E	RGS292917N0924612E	20090216	Google Earth	Complex	Talus-connected	Geomorphological	Active	Extended	Mono-unit	0.021517	0.209094	5115.13	4890	339.093	-0.941822	-1.1858	R2	W	27.6502	29.3559	92.4741	0.000960356	0.00344028
RGU292965N0924616E	RGS292965N0924616E	20090216	Google Earth	Complex	Talus-connected	Geomorphological	Active	Extended	Mono-unit	0.0188257	0.141154	5098.9	5010	323.27	1.56237	0.331567	R2	E	15.4235	29.4258	92.4511	0.00113127	0.00214691
RGU293559N0924741E	RGS293559N0924741E	20090216	Google Earth	Simple	Talus-connected	Geomorphological	Active	Extended	Mono-unit	0.00980186	0.051347	5125.38	5078	343.179	1.0335	-1.28775	R2	NE	18.0739	29.4338	92.454	0.000352767	0.00063797
RGU294258N0924511E	RGS294258N0924511E	20090216	Google Earth	Simple	Debris-mantled slope-connected	Geomorphological	Active	Extended	Mono-unit	0.0107884	0.067485	5243.73	5188	349.117	0.417208	-1.81199	R2	NE	15.2748	29.4366	92.4493	0.000545992	0.000885587
RGU294338N0924540E	RGS294338N0924540E	20181114	Google Earth	Complex	Talus-connected	Geomorphological	Transitional	Extended	Mono-unit	0.0125844	0.0714737	5325.69	5289	361.409	-0.460722	-2.65647	R2	NW	17.2131	29.4573	92.4568	0.000514801	0.000948764
RGU294366N0924493E	RGS294366N0924493E	20090216	Google Earth	Complex	Talus-connected	Geomorphological	Relict	Extended	Mono-unit	0.00745599	0.0306679	5304.38	5277	361.409	-0.70861	-2.65647	R2	NW	14.886	29.4598	92.4595
RGU294573N0924568E	RGS294573N0924568E	20090216	Google Earth	Complex	Talus-connected	Geomorphological	Transitional	Extended	Mono-unit	0.0104063	0.0493075	5341.22	5285	361.409	-0.204189	-2.65647	R2	W	18.3775	29.4614	92.4627	0.000333347	0.000607684
RGU294598N0924595E	RGS294598N0924595E	20090216	Google Earth	Complex	Debris-mantled slope-connected	Geomorphological	Transitional	Extended	Mono-unit	0.00732692	0.0152605	5338.11	5327	361.409	-0.389143	-2.65647	R2	NW	21.305	29.4591	92.4609	8.95243e-05	0.000148753
RGU294614N0924627E	RGS294614N0924627E	20090216	Google Earth	Complex	Talus-connected	Geomorphological	Active	Extended	Mono-unit	0.00423872	0.01041	5288.58	5273	358.385	-0.70861	-2.27525	R2	S	16.4405	29.4631	92.4586	7.83985e-05	9.39985e-05
RGU294591N0924609E	RGS294591N0924609E	20090216	Google Earth	Complex	Talus-connected	Geomorphological	Active	Extended	Mono-unit	0.0137195	0.0799729	5332.2	5291	358.915	-0.2587	-2.44654	R2	SW	13.6754	29.4534	92.4652	0.000720995	0.00108571
RGU294631N0924586E	RGS294631N0924586E	20090216	Google Earth	Complex	Talus-connected	Geomorphological	Active	Extended	Mono-unit	0.00681881	0.028208	5349.29	5326	360.846	-0.2587	-2.58356	R2	W	13.9186	29.4511	92.4671	0.000249951	0.000310906
RGU294534N0924652E	RGS294534N0924652E	20090216	Google Earth	Complex	Talus-connected	Geomorphological	Active	Extended	Mono-unit	0.00806708	0.0390504	5301.76	5275	356.172	-0.0272167	-2.25113	R2	W	14.4775	29.4485	92.4636	0.000332936	0.000459338
RGU294511N0924671E	RGS294511N0924671E	20090216	Google Earth	Complex	Talus-connected	Geomorphological	Active	Extended	Mono-unit	0.0103462	0.0563132	5266.09	5218	356.172	0.357898	-2.25113	R2	W	17.7118	29.4471	92.462	0.000394534	0.000712712
RGU294485N0924636E	RGS294485N0924636E	20090216	Google Earth	Complex	Talus-connected	Geomorphological	Active	Extended	Mono-unit	0.0270898	0.301815	5183.29	5093	357.224	0.507358	-2.38714	R2	SW	13.7791	29.4407	92.4599	0.00270093	0.00534407
RGU294471N0924620E	RGS294471N0924620E	20090216	Google Earth	Complex	Talus-connected	Geomorphological	Active	Extended	Mono-unit	0.00843406	0.0418277	5086.45	5039	347.044	1.0335	-1.55148	R2	W	21.4368	29.4336	92.4584	0.00024394	0.000498815
RGU294407N0924599E	RGS294407N0924599E	20090216	Google Earth	Simple	Talus-connected	Geomorphological	Active	Extended	Mono-unit	0.0049774	0.0176308	5033.86	5011	347.044	1.0335	-1.55148	R2	SW	18.6755	29.4308	92.4581	0.000117358	0.000176892
RGU294336N0924584E	RGS294336N0924584E	20090216	Google Earth	Simple	Debris-mantled slope-connected	Geomorphological	Active	Extended	Mono-unit	0.00710819	0.0174682	5272.1	5258	347.044	1.3453	-1.55148	R2	SW	10.2607	29.4323	92.4645	0.000209024	0.000174937
RGU294308N0924581E	RGS294308N0924581E	20090216	Google Earth	Complex	Talus-connected	Geomorphological	Active	Extended	Mono-unit	0.012471	0.072369	5284.06	5236	356.642	-0.176969	-2.27974	R2	SE	15.1211	29.4526	92.4598	0.000591316	0.000963042
RGU294323N0924645E	RGS294323N0924645E	20090216	Google Earth	Complex	Debris-mantled slope-connected	Geomorphological	Active	Extended	Mono-unit	0.0206614	0.186021	5267.58	5218	354.924	1.21512	-2.1321	R2	E	14.6294	29.4376	92.469	0.00156987	0.0029899
RGU294526N0924598E	RGS294526N0924598E	20090216	Google Earth	Complex	Debris-mantled slope-connected	Geomorphological	Transitional	Extended	Mono-unit	0.00800119	0.0457373	5353	5315	357.769	0.43575	-2.3293	R2	E	16.2752	29.4448	92.4679	0.000347854	0.000555273
RGU294376N0924690E	RGS294376N0924690E	20090216	Google Earth	Simple	Debris-mantled slope-connected	Geomorphological	Transitional	Extended	Mono-unit	0.00681561	0.0283887	5282.4	5244	351.923	1.3453	-1.89954	R2	NE	22.0718	29.4324	92.4693	0.000161028	0.000313298
RGU294448N0924679E	RGS294448N0924679E	20181114	Google Earth	Complex	Debris-mantled slope-connected	Geomorphological	Active	Extended	Mono-unit	0.00934306	0.0428138	5290.78	5234	355.865	-0.86638	-2.16088	R2	W	16.2275	29.4697	92.4639	0.000326552	0.000512959
RGU294324N0924693E	RGS294324N0924693E	20090216	Google Earth	Complex	Debris-mantled slope-connected	Geomorphological	Active	Extended	Mono-unit	0.00562284	0.0181943	5365.91	5337	355.865	-0.13357	-2.16088	R2	SE	19.7672	29.4647	92.4649	0.000114667	0.000183698
RGU294697N0924639E	RGS294697N0924639E	20090216	Google Earth	Complex	Talus-connected	Geomorphological	Active	Extended	Mono-unit	0.00898	0.0360453	5342.8	5308	364.687	-0.13357	-2.87307	R2	N	28.9087	29.4581	92.4687	0.00015893	0.000417255
RGU294647N0924649E	RGS294647N0924649E	20090216	Google Earth	Simple	Debris-mantled slope-connected	Geomorphological	Transitional	Extended	Mono-unit	0.0085072	0.0421079	5269.22	5205	353.326	0.93935	-1.86596	R2	NE	21.9571	29.4446	92.4799	0.000240032	0.000502827
RGU294581N0924687E	RGS294581N0924687E	20090216	Google Earth	Complex	Debris-mantled slope-connected	Geomorphological	Active	Extended	Mono-unit	0.0182577	0.111117	5294.94	5227	359.7	0.432536	-2.45328	R2	NE	18.8838	29.4481	92.4757	0.000731783	0.00161109
RGU294446N0924799E	RGS294446N0924799E	20181114	Google Earth	Complex	Talus-connected	Geomorphological	Active	Extended	Mono-unit	0.0368031	0.413425	5002.57	4774	349.349	-0.518405	-1.27693	R2	NW	16.6374	29.4644	92.5231	0.00307773	0.00779576
RGU294481N0924757E	RGS294481N0924757E	20120109	Google Earth	Simple	Talus-connected	Geomorphological	Active	Extended	Mono-unit	0.00943358	0.0621679	5138.74	5101	359.895	-0.92176	-2.46563	R2	NE	19.471	29.4105	92.5111	0.000397528	0.000802531
RGU294644N0925231E	RGS294644N0925231E	20120109	Google Earth	Complex	Talus-connected	Geomorphological	Active	Extended	Mono-unit	0.00763667	0.0367818	5227.69	5186	363.891	-0.92176	-2.82509	R2	NE	19.7772	29.4069	92.5114	0.0002317	0.000427506
RGU294105N0925111E	RGS294105N0925111E	20120109	Google Earth	Simple	Talus-connected	Geomorphological	Active	Extended	Mono-unit	0.0167566	0.110019	5267.11	5206	363.652	-0.845908	-2.80564	R2	E	18.3285	29.4041	92.5128	0.000745712	0.001592
RGU294069N0925114E	RGS294069N0925114E	20120109	Google Earth	Complex	Talus-connected	Geomorphological	Active	Extended	Mono-unit	0.0134035	0.0846164	5191.32	5107	362.813	-0.789334	-2.71792	R2	W	18.3918	29.408	92.5139	0.000571626	0.00116179
RGU294041N0925128E	RGS294041N0925128E	20120109	Google Earth	Simple	Talus-connected	Geomorphological	Active	Extended	Mono-unit	0.0121512	0.0890189	5302.17	5251	363.755	-0.805359	-2.81013	R2	NW	12.1741	29.4027	92.5162	0.000899741	0.0012347
RGU294080N0925139E	RGS294080N0925139E	20120109	Google Earth	Complex	Glacier forefield-connected	Geomorphological	Active	Extended	Mono-unit	0.027556	0.387019	5256.77	5174	361.299	-0.769105	-2.53047	R2	N	13.1817	29.4054	92.5226	0.00361742	0.00720214
RGU294027N0925162E	RGS294027N0925162E	20120109	Google Earth	Simple	Debris-mantled slope-connected	Geomorphological	Relict	Extended	Mono-unit	0.00805838	0.0462498	5116.21	5046	355.3	-0.59544	-2.01818	R2	W	28.8047	29.417	92.5197
RGU294054N0925226E	RGS294054N0925226E	20120109	Google Earth	Complex	Talus-connected	Geomorphological	Active	Extended	Mono-unit	0.0168051	0.0930678	4980.18	4914	350.565	-0.561848	-1.70626	R2	W	14.1027	29.4181	92.5108	0.000814124	0.00130239
RGU294170N0925197E	RGS294170N0925197E	20120109	Google Earth	Complex	Talus-connected	Geomorphological	Active	Extended	Mono-unit	0.00900255	0.0509888	5076.09	5029	359.838	-0.620582	-2.4607	R2	NW	15.9684	29.4131	92.512	0.000395047	0.000632633
RGU294181N0925108E	RGS294181N0925108E	20120109	Google Earth	Complex	Talus-connected	Geomorphological	Relict	Extended	Mono-unit	0.0373951	0.42172	4732.27	4507	339.718	0.11396	-0.789479	R2	NW	20.4762	29.4252	92.4958
RGU294131N0925120E	RGS294131N0925120E	20120109	Google Earth	Simple	Debris-mantled slope-connected	Geomorphological	Active	Extended	Mono-unit	0.013158	0.104077	5293.98	5196	354.652	-0.9265	-2.26595	R2	SW	19.4582	29.3551	92.5124	0.000665931	0.00148938
RGU294252N0924958E	RGS294252N0924958E	20120109	Google Earth	Complex	Debris-mantled slope-connected	Geomorphological	Active	Extended	Mono-unit	0.0164637	0.111363	5206.55	5167	352.361	-0.733208	-2.06943	R2	W	15.9599	29.3502	92.5111	0.000863258	0.00161537
RGU293551N0925124E	RGS293551N0925124E	20120109	Google Earth	Complex	Debris-mantled slope-connected	Geomorphological	Active	Extended	Mono-unit	0.0346366	0.41971	5196.2	5052	346.49	-0.444147	-1.58885	R2	W	16.1166	29.3436	92.511	0.00322268	0.0079382
RGU293502N0925111E	RGS293502N0925111E	20120109	Google Earth	Simple	Debris-mantled slope-connected	Geomorphological	Active	Extended	Mono-unit	0.00898634	0.0567435	5036.56	4982	340.798	0.2226	-1.20276	R2	E	22.2698	29.3363	92.5057	0.000319146	0.000719254
RGU293436N0925110E	RGS293436N0925110E	20120109	Google Earth	Simple	Debris-mantled slope-connected	Geomorphological	Active	Extended	Mono-unit	0.00877855	0.051117	5029.83	5004	342.927	0.16765	-1.37126	R2	E	17.315	29.3389	92.5059	0.000366077	0.000634543
RGU293363N0925057E	RGS293363N0925057E	20120109	Google Earth	Complex	Debris-mantled slope-connected	Geomorphological	Active	Extended	Mono-unit	0.0286891	0.246764	5203.91	5048	343.246	-0.187199	-1.40743	R2	NE	24.1203	29.3409	92.5013	0.00128707	0.00419683
RGU293389N0925059E	RGS293389N0925059E	20120109	Google Earth	Complex	Talus-connected	Geomorphological	Active	Extended	Mono-unit	0.0134107	0.108617	4968.72	4890	333.75	0.187556	-0.555848	R2	W	21.5556	29.3303	92.5151	0.000630131	0.00156769
RGU293409N0925013E	RGS293409N0925013E	20120109	Google Earth	Simple	Talus-connected	Geomorphological	Active	Extended	Mono-unit	0.00884991	0.0517804	4920.02	4869	334.091	0.261854	-0.604379	R2	W	22.4622	29.3281	92.514	0.000288864	0.000644437
RGU293303N0925151E	RGS293303N0925151E	20120109	Google Earth	Simple	Talus-connected	Geomorphological	Active	Extended	Mono-unit	0.00835477	0.0510639	4905.56	4886	334.482	0.192142	-0.706548	R2	SW	13.0037	29.326	92.5132	0.000483705	0.000633753
RGU293281N0925140E	RGS293281N0925140E	20120109	Google Earth	Complex	Talus-connected	Geomorphological	Active	Extended	Mono-unit	0.0161427	0.108319	5424.85	5377	360.62	-0.951212	-2.68322	R2	SE	13.4024	29.3512	92.5245	0.000996069	0.00156253
RGU293260N0925132E	RGS293260N0925132E	20090216	Google Earth	Simple	Glacier forefield-connected	Geomorphological	Active	Extended	Mono-unit	0.0215508	0.135808	5306.73	5191	368.321	-0.551542	-3.17866	R2	W	17.4102	29.3901	92.5239	0.000967437	0.00204971
RGU293512N0925245E	RGS293512N0925245E	20090216	Google Earth	Simple	Glacier forefield-connected	Geomorphological	Active	Extended	Mono-unit	0.0177815	0.120682	5213.05	5075	370.023	-0.63247	-3.43948	R2	NE	21.8212	29.3707	92.5185	0.00069201	0.00177891
RGU293901N0925239E	RGS293901N0925239E	20090216	Google Earth	Complex	Debris-mantled slope-connected	Geomorphological	Relict	Extended	Mono-unit	0.0140231	0.0749909	5090.04	4968	343.569	-0.5386	-1.43266	R2	W	23.2645	29.3017	92.5186
RGU293707N0925185E	RGS293707N0925185E	20190216	Google Earth	Simple	Glacier forefield-connected	Geomorphological	Active	Extended	Mono-unit	0.0315959	0.487215	4926.9	4682	339.381	-0.189319	-1.23374	R2	N	19.4372	29.2648	92.5158	0.00312067	0.00949396
RGU293017N0925186E	RGS293017N0925186E	20120109	Google Earth	Complex	Debris-mantled slope-connected	Geomorphological	Active	Extended	Mono-unit	0.00783777	0.038382	5028.47	4990	352.338	-0.27948	-2.13884	R2	NW	21.6037	29.289	92.5227	0.000222197	0.00044992
RGU292648N0925158E	RGS292648N0925158E	20120109	Google Earth	Complex	Debris-mantled slope-connected	Geomorphological	Active	Extended	Mono-unit	0.0260666	0.320321	5099.4	5022	341.657	0.277383	-1.2958	R2	N	15.2284	29.2854	92.5213	0.0025993	0.00573965
RGU292890N0925227E	RGS292890N0925227E	20200818	Google Earth	Simple	Debris-mantled slope-connected	Geomorphological	Active	Extended	Mono-unit	0.00688918	0.0283057	4885.88	4847	326.154	-0.43406	-0.0798759	R2	W	19.4918	29.2899	92.5103	0.000180813	0.000312199
RGU292854N0925213E	RGS292854N0925213E	20120109	Google Earth	Complex	Debris-mantled slope-connected	Geomorphological	Transitional	Extended	Mono-unit	0.00888671	0.0519178	4899.26	4839	336.227	-0.39144	-0.90161	R2	N	19.8795	29.3005	92.5098	0.000325431	0.00064649
RGU292899N0925103E	RGS292899N0925103E	20120109	Google Earth	Simple	Debris-mantled slope-connected	Geomorphological	Transitional	Extended	Mono-unit	0.0045412	0.0134047	4935.27	4901	338.324	-0.86439	-1.04284	R2	NW	27.5091	29.3084	92.5177	6.1858e-05	0.000127319
RGU293005N0925098E	RGS293005N0925098E	20120109	Google Earth	Simple	Debris-mantled slope-connected	Geomorphological	Active	Extended	Mono-unit	0.00725982	0.0347189	5221.02	5179	338.324	0.56953	-1.12743	R2	N	24.9406	29.3253	92.4964	0.000175493	0.000398898
RGU293084N0925177E	RGS293084N0925177E	20120109	Google Earth	Complex	Debris-mantled slope-connected	Geomorphological	Active	Extended	Mono-unit	0.0128843	0.076731	5170.74	5086	327.028	0.47286	-0.183393	R2	N	18.4066	29.3149	92.4982	0.000517955	0.00103311
RGU293253N0924964E	RGS293253N0924964E	20120109	Google Earth	Complex	Debris-mantled slope-connected	Geomorphological	Relict	Extended	Mono-unit	0.00751419	0.0410368	4815.08	4780	363.931	-0.160939	-2.94325	R2	N	20.3365	29.3886	92.5037
RGU293149N0924982E	RGS293149N0924982E	20120109	Google Earth	Complex	Talus-connected	Geomorphological	Active	Extended	Mono-unit	0.0110756	0.0690461	5270.23	5202	342.153	-0.133384	-1.2291	R2	N	29.1262	29.3859	92.4875	0.000302359	0.000910226
RGU293886N0925037E	RGS293886N0925037E	20181114	Google Earth	Complex	Talus-connected	Geomorphological	Relict	Extended	Mono-unit	0.026044	0.171175	5192.89	5048	346.934	-0.172839	-1.0998	R2	NW	13.0413	29.4531	92.5252
RGU293859N0924875E	RGS293859N0924875E	20181114	Google Earth	Complex	Talus-connected	Geomorphological	Transitional	Extended	Mono-unit	0.0288552	0.194308	4891.55	4700	335.277	0.782156	-0.127911	R2	W	24.6858	29.4567	92.5148	0.00099166	0.00315044
RGU294531N0925252E	RGS294531N0925252E	20090216	Google Earth	Simple	Talus-connected	Geomorphological	Active	Extended	Mono-unit	0.00869682	0.0429967	5254.71	5184	363.452	-2.2603	-3.0752	R2	NE	26.5991	29.36	92.4946	0.000204682	0.00051559
RGU294567N0925148E	RGS294567N0925148E	20090216	Google Earth	Complex	Glacier forefield-connected	Geomorphological	Active	Extended	Mono-unit	0.0177718	0.203713	5139.61	5014	370.082	-1.70354	-3.58964	R2	N	19.0384	29.3659	92.4932	0.00133109	0.0033343
RGU293600N0924946E	RGS293600N0924946E	20090216	Google Earth	Complex	Glacier forefield-connected	Geomorphological	Active	Extended	Mono-unit	0.0189974	0.197363	5206.17	5164	360.233	-2.23912	-2.79665	R2	N	12.108	29.3622	92.4965	0.00200553	0.00320997
RGU293659N0924932E	RGS293659N0924932E	20090216	Google Earth	Simple	Debris-mantled slope-connected	Geomorphological	Active	Extended	Mono-unit	0.0084561	0.0382716	5297.89	5248	351.055	-0.64184	-1.98219	R2	NW	24.268	29.3686	92.5011	0.000198475	0.000448369
RGU293622N0924965E	RGS293622N0924965E	20090216	Google Earth	Simple	Talus-connected	Geomorphological	Active	Extended	Mono-unit	0.00635381	0.0260742	4937.84	4911	355.391	-0.502	-2.38139	R2	W	18.2803	29.3777	92.4964	0.000177182	0.000282902
RGU293686N0925011E	RGS293686N0925011E	20181114	Google Earth	Complex	Talus-connected	Geomorphological	Transitional	Extended	Mono-unit	0.0466015	0.484391	5131.86	4950	358.118	0.133553	-2.25095	R2	NE	14.7314	29.4612	92.4858	0.00406019	0.00942797
RGU293777N0924964E	RGS293777N0924964E	20181114	Google Earth	Complex	Talus-connected	Geomorphological	Active	Extended	Mono-unit	0.00668827	0.0280828	5265.03	5252	364.687	-0.16509	-2.87307	R2	NE	8.73258	29.4588	92.4747	0.000394257	0.000309251
RGU294612N0924858E	RGS294612N0924858E	20181114	Google Earth	Complex	Talus-connected	Geomorphological	Transitional	Extended	Mono-unit	0.0112244	0.0267349	5257.5	5211	364.687	-0.16509	-2.85881	R2	NE	14.4289	29.4602	92.475	0.000228688	0.000291526
RGU294588N0924747E	RGS294588N0924747E	20181114	Google Earth	Simple	Glacier forefield-connected	Geomorphological	Transitional	Extended	Mono-unit	0.00589968	0.0218989	5229.27	5202	364.687	-0.16509	-2.87307	R2	NE	19.6467	29.4614	92.4746	0.000138827	0.00022945
RGU294602N0924750E	RGS294602N0924750E	20181114	Google Earth	Complex	Talus-connected	Geomorphological	Relict	Extended	Mono-unit	0.0231034	0.260682	4959.85	4841	343.99	0.407566	-0.999046	R2	NE	16.0333	29.4611	92.5005
RGU294614N0924746E	RGS294614N0924746E	20181114	Google Earth	Complex	Talus-connected	Geomorphological	Relict	Extended	Mono-unit	0.0100837	0.0411732	5153.21	5127	357.875	1.1846	-2.24758	R2	W	16.7456	29.4522	92.4947
RGU294611N0925005E	RGS294494N0924928E	20181114	Google Earth	Simple	Debris-mantled slope-connected	Geomorphological	Relict	Extended	Multi-unit	0.0067427	0.0236143	5211.38	5177	357.875	1.1846	-2.24758	R2	NW	20.3945	29.449	92.4936
RGU294522N0924947E	RGS294494N0924928E	20181114	Google Earth	Simple	Debris-mantled slope-connected	Geomorphological	Relict	Extended	Multi-unit	0.00515311	0.0148879	5203.17	5191	357.875	1.36255	-2.24758	R2	NW	10.5754	29.4484	92.4925
RGU294490N0924936E	RGS294490N0924936E	20181114	Google Earth	Complex	Talus-connected	Geomorphological	Active	Extended	Mono-unit	0.0138083	0.111184	5235.18	5179	364.59	-0.542475	-2.53952	R2	E	16.465	29.4602	92.5331	0.000836126	0.00161225
RGU294484N0924925E	RGS294484N0924925E	20181114	Google Earth	Complex	Talus-connected	Geomorphological	Transitional	Extended	Mono-unit	0.0105784	0.0486046	5217.64	5192	364.59	-0.38053	-2.47529	R2	W	19.2151	29.4621	92.5349	0.000314778	0.000597304
RGU294602N0925331E	RGS294602N0925331E	20181114	Google Earth	Simple	Debris-mantled slope-connected	Geomorphological	Transitional	Extended	Mono-unit	0.00980864	0.0450713	5315.43	5250	366.626	-0.38053	-2.70979	R2	NW	16.9478	29.4633	92.5393	0.000329562	0.000545586
RGU294621N0925349E	RGS294621N0925349E	20181114	Google Earth	Complex	Talus-connected	Geomorphological	Active	Extended	Mono-unit	0.0159409	0.109924	5324.01	5251	366.851	-0.999579	-2.70238	R2	SW	17.2732	29.4671	92.5392	0.000789071	0.00159035
RGU294633N0925393E	RGS294633N0925393E	20181114	Google Earth	Complex	Debris-mantled slope-connected	Geomorphological	Active	Extended	Mono-unit	0.0182861	0.120311	5150.06	5096	364.258	0.08134	-2.41414	R2	SW	16.4505	29.4568	92.5564	0.000905541	0.00177235
RGU294568N0925564E	RGS294568N0925564E	20181114	Google Earth	Simple	Talus-connected	Geomorphological	Active	Extended	Mono-unit	0.00459414	0.0153635	5436.37	5416	363.613	-0.79129	-2.33542	R2	SW	18.5924	29.471	92.5566	0.000102707	0.000149958
RGU294678N0925568E	RGS294678N0925568E	20181114	Google Earth	Complex	Talus-connected	Geomorphological	Active	Extended	Mono-unit	0.0164816	0.108627	5178.09	5099	364.258	0.136077	-2.41414	R2	NE	26.7357	29.4577	92.5526	0.00051466	0.00156786
RGU294710N0925566E	RGS294710N0925566E	20181114	Google Earth	Complex	Talus-connected	Geomorphological	Active	Extended	Mono-unit	0.00698282	0.0295249	5266.97	5220	365.328	-0.041209	-2.50887	R2	NE	32.4397	29.4608	92.5486	0.000117318	0.000328404
RGU294577N0925526E	RGS294577N0925526E	20181114	Google Earth	Complex	Talus-connected	Geomorphological	Active	Extended	Mono-unit	0.0160571	0.105513	5333.85	5256	367.953	-0.064833	-2.7459	R2	E	19.8864	29.4637	92.5455	0.000661152	0.00151407
RGU294608N0925486E	RGS294608N0925486E	20181114	Google Earth	Complex	Talus-connected	Geomorphological	Active	Extended	Mono-unit	0.00510531	0.0149189	5398.5	5377	368.105	-0.97042	-2.74604	R2	E	32.1871	29.4678	92.544	5.96956e-05	0.000144766
RGU294637N0925455E	RGS294637N0925455E	20181114	Google Earth	Complex	Talus-connected	Geomorphological	Active	Extended	Mono-unit	0.0189264	0.148474	5331.91	5278	364.689	-0.203881	-2.42425	R2	E	13.4348	29.4646	92.5639	0.00136209	0.00228119
RGU294678N0925440E	RGS294678N0925440E	20181114	Google Earth	Complex	Debris-mantled slope-connected	Geomorphological	Active	Extended	Mono-unit	0.00648006	0.0223594	5291.68	5278	354.608	0.14908	-1.54537	R2	N	15.6568	29.4607	92.566	0.000176593	0.000235253
RGU294646N0925639E	RGS294646N0925639E	20181114	Google Earth	Complex	Debris-mantled slope-connected	Geomorphological	Active	Extended	Mono-unit	0.00447603	0.0112507	5299.15	5290	353.136	0.14908	-1.30228	R2	N	21.3281	29.4603	92.5681	6.59332e-05	0.000103181
RGU294607N0925660E	RGS294607N0925660E	20120109	Google Earth	Complex	Debris-mantled slope-connected	Geomorphological	Transitional	Extended	Mono-unit	0.0070997	0.0306036	5108.95	5077	354.714	0.86757	-1.88036	R2	NW	18.1936	29.4227	92.5273	0.000208918	0.000342854
RGU294603N0925681E	RGS294603N0925681E	20120109	Google Earth	Complex	Debris-mantled slope-connected	Geomorphological	Transitional	Extended	Mono-unit	0.00516524	0.0191843	5124.75	5074	353.077	0.86757	-1.80683	R2	E	32.4174	29.4232	92.5248	7.62765e-05	0.000195758
RGU294227N0925273E	RGS294227N0925273E	20090216	Google Earth	Simple	Glacier forefield-connected	Geomorphological	Active	Extended	Mono-unit	0.0247836	0.192359	5044.88	4789	355.353	0.494228	-1.88066	R2	NE	22.3098	29.4215	92.5393	0.00108006	0.00311256
RGU294232N0925248E	RGS294232N0925248E	20090216	Google Earth	Complex	Glacier forefield-connected	Geomorphological	Active	Extended	Mono-unit	0.031222	0.321503	5268.73	5136	364.669	0.132462	-2.72844	R2	NE	13.7317	29.4185	92.5312	0.00288686	0.00576506
RGU294215N0925393E	RGS294215N0925393E	20120109	Google Earth	Complex	Talus-connected	Geomorphological	Active	Extended	Mono-unit	0.0130599	0.0657206	5169.62	5047	361.143	-0.0652656	-2.35169	R2	N	18.3293	29.4111	92.5398	0.000445437	0.000857875
RGU294185N0925312E	RGS294185N0925312E	20120109	Google Earth	Complex	Glacier forefield-connected	Geomorphological	Active	Extended	Mono-unit	0.0196015	0.129827	5266.39	5187	371.746	-0.13286	-3.32331	R2	NE	13.114	29.4083	92.536	0.00121963	0.00194187
RGU294111N0925398E	RGS294111N0925398E	20120109	Google Earth	Complex	Glacier forefield-connected	Geomorphological	Active	Extended	Mono-unit	0.0148859	0.104641	5322.8	5262	371.655	-0.209137	-3.34264	R2	E	16.868	29.4073	92.5334	0.000768654	0.00149909
RGU294083N0925360E	RGS294083N0925360E	20090216	Google Earth	Simple	Talus-connected	Geomorphological	Active	Extended	Mono-unit	0.00778067	0.0442988	5288.94	5251	355.257	-0.48356	-1.73247	R2	N	15.2171	29.3963	92.5381	0.00035973	0.000534384
RGU294073N0925334E	RGS294073N0925334E	20090216	Google Earth	Complex	Talus-connected	Geomorphological	Active	Extended	Mono-unit	0.00439692	0.0125801	5320.5	5314	362.828	-0.48356	-2.63091	R2	N	6.39786	29.3956	92.5356	0.00024063	0.000117978
RGU293963N0925381E	RGS293963N0925381E	20090216	Google Earth	Complex	Talus-connected	Geomorphological	Active	Extended	Mono-unit	0.0153184	0.0986471	5294.52	5242	353.257	-0.38669	-1.73249	R2	NE	22.5562	29.3883	92.5376	0.000548143	0.00139664
RGU293956N0925356E	RGS293956N0925356E	20120109	Google Earth	Complex	Talus-connected	Geomorphological	Active	Extended	Mono-unit	0.00705262	0.0289368	5370.56	5336	368.562	-0.392962	-3.03909	R2	S	20.8465	29.3761	92.562	0.000173316	0.00032057
RGU293883N0925376E	RGS293883N0925376E	20120109	Google Earth	Simple	Debris-mantled slope-connected	Geomorphological	Active	Extended	Mono-unit	0.00502346	0.0199985	5051.54	5018	372.603	-0.40385	-3.30756	R2	NE	24.7394	29.3802	92.5719	0.000101856	0.000205768
RGU293761N0925620E	RGS293761N0925620E	20120109	Google Earth	Complex	Debris-mantled slope-connected	Geomorphological	Active	Extended	Mono-unit	0.0145431	0.120246	5348.94	5298	364.239	-0.261083	-2.70011	R2	E	13.6413	29.3911	92.5625	0.00108674	0.0017712
RGU293802N0925719E	RGS293802N0925719E	20120109	Google Earth	Simple	Debris-mantled slope-connected	Geomorphological	Active	Extended	Mono-unit	0.010324	0.0588261	5356.26	5306	349.77	0.135463	-1.3616	R2	NE	14.8836	29.3966	92.5661	0.000488153	0.000751046
RGU293911N0925625E	RGS293911N0925625E	20120109	Google Earth	Simple	Debris-mantled slope-connected	Geomorphological	Active	Extended	Mono-unit	0.00867736	0.040698	5373.43	5313	351.743	0.131023	-1.4788	R2	E	20.0803	29.3995	92.5655	0.000252656	0.000482692
RGU293966N0925661E	RGS293966N0925661E	20120109	Google Earth	Complex	Debris-mantled slope-connected	Geomorphological	Active	Extended	Mono-unit	0.00991969	0.0550264	5207.55	5164	362.254	0.16672	-2.3364	R2	NE	18.6516	29.3981	92.5718	0.000366734	0.000693215
RGU293995N0925655E	RGS293995N0925655E	20120109	Google Earth	Complex	Debris-mantled slope-connected	Geomorphological	Active	Extended	Mono-unit	0.0192822	0.140062	5177.75	5071	352.783	0.015197	-1.46305	R2	NE	16.934	29.4054	92.5709	0.00102494	0.00212699
RGU293981N0925718E	RGS293981N0925718E	20090216	Google Earth	Simple	Debris-mantled slope-connected	Geomorphological	Active	Extended	Mono-unit	0.0119747	0.0704106	5281.6	5207	363.727	-0.402293	-2.96527	R2	E	18.9066	29.3461	92.5254	0.000463163	0.000931855
RGU294054N0925709E	RGS294054N0925709E	20090216	Google Earth	Complex	Talus-connected	Geomorphological	Active	Extended	Mono-unit	0.00718253	0.0342559	5357.69	5321	366.342	-0.780357	-3.09048	R2	SW	22.4591	29.3519	92.5334	0.000191127	0.000392523
RGU293461N0925254E	RGS293461N0925254E	20090216	Google Earth	Complex	Talus-connected	Geomorphological	Active	Extended	Mono-unit	0.00955801	0.0486842	5336.48	5283	366.342	-0.637332	-3.09048	R2	W	22.8783	29.3497	92.5338	0.000266911	0.000598477
RGU293519N0925334E	RGS293519N0925334E	20090216	Google Earth	Complex	Debris-mantled slope-connected	Geomorphological	Active	Extended	Mono-unit	0.0123502	0.0793668	5327.25	5290	367.011	-0.59126	-3.05225	R2	SW	14.5003	29.3838	92.5276	0.000675628	0.00107584
RGU293497N0925338E	RGS293497N0925338E	20090216	Google Earth	Complex	Glacier forefield-connected	Geomorphological	Active	Extended	Mono-unit	0.0107089	0.0427718	5338.75	5279	354.954	-0.566932	-2.08507	R2	SW	20.1107	29.3792	92.5317	0.000265145	0.000512355
RGU293838N0925276E	RGS293838N0925276E	20090216	Google Earth	Complex	Glacier forefield-connected	Geomorphological	Active	Extended	Mono-unit	0.00892649	0.0518661	5376.03	5324	354.954	-0.476556	-2.08507	R2	SW	20.7058	29.3786	92.5341	0.000312669	0.000645718
RGU293792N0925317E	RGS293792N0925317E	20090216	Google Earth	Complex	Talus-connected	Geomorphological	Active	Extended	Mono-unit	0.0119143	0.109218	4987.81	4946	344.728	-0.47968	-1.06959	R2	E	19.5315	29.3844	92.547	0.000696306	0.0015781
RGU293786N0925341E	RGS293786N0925341E	20090216	Google Earth	Simple	Debris-mantled slope-connected	Geomorphological	Active	Extended	Mono-unit	0.00621465	0.0285422	5365.21	5315	356.732	-0.98347	-2.08769	R2	S	28.9521	29.3603	92.5612	0.000125675	0.000315332
RGU293844N0925470E	RGS293844N0925470E	20090216	Google Earth	Complex	Debris-mantled slope-connected	Geomorphological	Active	Extended	Mono-unit	0.00739096	0.0319822	5181.78	5150	346.296	-1.04249	-1.40901	R2	NW	18.9147	29.3323	92.5537	0.000210293	0.000361471
RGU293603N0925612E	RGS293603N0925612E	20090216	Google Earth	Simple	Debris-mantled slope-connected	Geomorphological	Relict	Extended	Mono-unit	0.0101844	0.0750686	4973.71	4918	336.909	-0.859104	-0.767926	R2	N	22.9789	29.3236	92.534
RGU293323N0925537E	RGS293323N0925537E	20090216	Google Earth	Complex	Debris-mantled slope-connected	Geomorphological	Active	Extended	Mono-unit	0.0074798	0.0256159	4961.23	4933	331.345	-1.3373	-0.39069	R2	N	19.835	29.3194	92.5258	0.000160911	0.000276946
RGU293236N0925340E	RGS293236N0925340E	20090216	Google Earth	Complex	Talus-connected	Geomorphological	Relict	Extended	Mono-unit	0.00980785	0.0504389	5231	5203	355.042	-0.113598	-2.07376	R2	SW	11.8502	29.3494	92.5479
RGU293194N0925258E	RGS293194N0925258E	20090216	Google Earth	Complex	Talus-connected	Geomorphological	Active	Extended	Mono-unit	0.0136798	0.0669378	5295.75	5234	361.82	-0.18161	-2.57905	R2	SW	14.8309	29.3511	92.5496	0.000557396	0.000876976
RGU293494N0925479E	RGS293494N0925479E	20090216	Google Earth	Simple	Talus-connected	Geomorphological	Active	Extended	Mono-unit	0.0164684	0.0969073	5357.96	5272	364.38	-0.18161	-2.82145	R2	W	19.6311	29.3532	92.5492	0.00061481	0.00136713
RGU293511N0925496E	RGS293511N0925496E	20120109	Google Earth	Complex	Debris-mantled slope-connected	Geomorphological	Active	Extended	Mono-unit	0.01429	0.0688604	5188.75	5153	356.146	0.611807	-2.08708	R2	NE	22.096	29.3333	92.5746	0.000390187	0.000907289
RGU293532N0925492E	RGS293532N0925492E	20090216	Google Earth	Simple	Talus-connected	Geomorphological	Active	Extended	Mono-unit	0.01083	0.0867229	5248.5	5200	358.267	-0.77884	-2.3874	R2	W	17.5729	29.3076	92.5701	0.000612237	0.00119658
RGU293333N0925746E	RGS293333N0925746E	20090216	Google Earth	Simple	Talus-connected	Geomorphological	Active	Extended	Mono-unit	0.00589975	0.0262241	5211.7	5172	350.28	-0.30514	-1.78787	R2	SW	18.044	29.3021	92.569	0.000180455	0.000284855
RGU293076N0925701E	RGS293076N0925701E	20090216	Google Earth	Complex	Talus-connected	Geomorphological	Active	Extended	Mono-unit	0.0127643	0.0871531	5126.03	5051	357.058	-0.298329	-2.15609	R2	W	23.8152	29.2848	92.5696	0.000460051	0.00120371
RGU293021N0925690E	RGS293021N0925690E	20090216	Google Earth	Complex	Talus-connected	Geomorphological	Active	Extended	Mono-unit	0.0156096	0.146021	4983.94	4937	344.004	-0.60454	-1.33993	R2	W	15.0698	29.2808	92.5565	0.00119708	0.00223604
RGU292848N0925696E	RGS292848N0925696E	20200818	Google Earth	Simple	Talus-connected	Geomorphological	Relict	Extended	Mono-unit	0.00699392	0.0360195	4925.9	4890	336.73	-0.54138	-0.907518	R2	NW	17.1379	29.2743	92.547
RGU292808N0925565E	RGS292808N0925565E	20200818	Google Earth	Simple	Talus-connected	Geomorphological	Relict	Extended	Mono-unit	0.00703556	0.0379941	4930.79	4901	331.633	-0.54138	-0.486397	R2	NW	22.3185	29.2734	92.545
RGU292743N0925470E	RGS292743N0925470E	20200818	Google Earth	Simple	Talus-connected	Geomorphological	Transitional	Extended	Mono-unit	0.0121429	0.1051	4918.06	4884	330.315	-0.17044	-0.341669	R2	NW	15.1821	29.2724	92.5423	0.000855389	0.00150697
RGU292734N0925450E	RGS292734N0925450E	20200818	Google Earth	Simple	Talus-connected	Geomorphological	Transitional	Extended	Mono-unit	0.0115538	0.072855	5042.12	4991	329.814	-0.541316	-0.262413	R2	N	18.8236	29.2674	92.5425	0.000481279	0.00097081
RGU292724N0925423E	RGS292724N0925423E	20200818	Google Earth	Complex	Talus-connected	Geomorphological	Transitional	Extended	Mono-unit	0.0174977	0.119967	5134.03	5095	344.686	0.1346	-1.48069	R2	N	12.9794	29.2573	92.5381	0.00113848	0.00176626
RGU292674N0925425E	RGS292674N0925425E	20200818	Google Earth	Complex	Talus-connected	Geomorphological	Transitional	Extended	Mono-unit	0.00590781	0.0233895	5217.74	5193	329.806	0.1346	-0.339405	R2	NW	16.4183	29.253	92.5363	0.00017638	0.000248317
RGU292573N0925381E	RGS292573N0925381E	20200818	Google Earth	Complex	Debris-mantled slope-connected	Geomorphological	Transitional	Extended	Mono-unit	0.00831769	0.043629	5164.72	5110	345.182	0.1346	-1.5016	R2	N	18.1111	29.2562	92.5358	0.000299148	0.000524702
RGU292530N0925363E	RGS292530N0925363E	20200818	Google Earth	Complex	Debris-mantled slope-connected	Geomorphological	Transitional	Extended	Mono-unit	0.0129755	0.109295	5135.91	5086	351.908	0.309672	-2.11687	R2	NE	14.9367	29.2579	92.5334	0.0009038	0.00157943
RGU292562N0925358E	RGS292562N0925358E	20200818	Google Earth	Simple	Talus-connected	Geomorphological	Active	Extended	Mono-unit	0.01623	0.144324	5063.44	4985	351.851	-0.524703	-2.11687	R2	NE	17.3776	29.2614	92.531	0.00102998	0.00220491
RGU292579N0925334E	RGS292579N0925334E	20200818	Google Earth	Simple	Talus-connected	Geomorphological	Active	Extended	Mono-unit	0.0231405	0.259435	5042.62	4874	342.575	-0.611739	-1.42837	R2	NW	15.9711	29.2634	92.5251	0.00200969	0.00445673
RGU292614N0925310E	RGS292614N0925310E	20200818	Google Earth	Complex	Debris-mantled slope-connected	Geomorphological	Transitional	Extended	Mono-unit	0.0115349	0.0693134	5200.49	5140	350.199	-0.53302	-1.81481	R2	NE	15.738	29.2928	92.5413	0.00054468	0.000914458
RGU292634N0925251E	RGS292634N0925251E	20200818	Google Earth	Simple	Debris-mantled slope-connected	Geomorphological	Relict	Extended	Mono-unit	0.00505046	0.0201512	5265.42	5245	346.392	-0.53302	-1.53549	R2	NE	19.3703	29.289	92.5412
RGU292928N0925413E	RGS292928N0925413E	20200818	Google Earth	Complex	Debris-mantled slope-connected	Geomorphological	Transitional	Extended	Mono-unit	0.0110135	0.0587803	5296.89	5238	357.511	-0.645566	-2.48779	R2	E	22.1297	29.2945	92.5365	0.000332588	0.000750345
RGU292890N0925412E	RGS292890N0925412E	20200818	Google Earth	Simple	Debris-mantled slope-connected	Geomorphological	Relict	Extended	Mono-unit	0.00944809	0.0464281	5234.21	5200	357.511	-0.37656	-2.48779	R2	W	16.4372	29.298	92.5308
RGU292945N0925365E	RGS292945N0925365E	20200818	Google Earth	Simple	Talus-connected	Geomorphological	Transitional	Extended	Mono-unit	0.00670236	0.0331325	5325.73	5277	357.511	-0.312958	-2.48779	R2	NW	23.2684	29.295	92.531	0.000178768	0.000377127
RGU292980N0925308E	RGS292980N0925308E	20200818	Google Earth	Complex	Talus-connected	Geomorphological	Transitional	Extended	Mono-unit	0.00700392	0.0269667	5306.18	5284	358.777	-0.278438	-2.60646	R2	W	21.5128	29.2916	92.533	0.00015674	0.000294561
RGU292950N0925310E	RGS292950N0925310E	20200818	Google Earth	Simple	Debris-mantled slope-connected	Geomorphological	Transitional	Extended	Mono-unit	0.00684896	0.0312004	5110.92	5089	352.338	-0.22948	-2.13884	R2	N	13.2547	29.2897	92.5269	0.000290048	0.000350892
RGU292916N0925330E	RGS292916N0925330E	20181114	Google Earth	Complex	Talus-connected	Geomorphological	Active	Extended	Mono-unit	0.0143436	0.0956443	5180.5	5108	349.539	-0.039918	-1.22822	R2	SW	13.3558	29.4522	92.5406	0.000882529	0.00134578
RGU292897N0925269E	RGS292897N0925269E	20181114	Google Earth	Complex	Talus-connected	Geomorphological	Active	Extended	Mono-unit	0.0123854	0.064494	5292.73	5233	367.789	-0.270061	-2.7457	R2	S	16.9331	29.4582	92.5418	0.000471979	0.000838699
RGU294522N0925406E	RGS294522N0925406E	20181114	Google Earth	Simple	Talus-connected	Geomorphological	Active	Extended	Mono-unit	0.0041456	0.0116935	5230	5206	367.789	-0.039918	-2.7457	R2	S	18.9044	29.4558	92.542	7.69285e-05	0.000108072
RGU294582N0925418E	RGS294582N0925418E	20181114	Google Earth	Complex	Talus-connected	Geomorphological	Active	Extended	Mono-unit	0.00465878	0.0125181	5336.64	5326	367.789	-0.0934122	-2.7457	R2	S	15.2078	29.4594	92.5437	0.000101714	0.000117282
RGU294558N0925420E	RGS294558N0925420E	20181114	Google Earth	Simple	Debris-mantled slope-connected	Geomorphological	Transitional	Extended	Mono-unit	0.00736308	0.0161498	5324.35	5248	350.023	0.287609	-1.24943	R2	NE	20.3752	29.4526	92.5534	9.88681e-05	0.000159215
RGU294594N0925437E	RGS294594N0925437E	20181114	Google Earth	Complex	Talus-connected	Geomorphological	Active	Extended	Mono-unit	0.0107685	0.0641599	4779.07	4705	358.208	-0.638875	-2.00742	R2	N	22.7675	29.4225	92.5595	0.000353377	0.000833488
RGU294526N0925534E	RGS294526N0925534E	20181114	Google Earth	Simple	Talus-connected	Geomorphological	Active	Extended	Mono-unit	0.00951656	0.0609339	4787.52	4719	358.212	0.00385954	-2.00311	R2	N	24.0377	29.4209	92.5613	0.000318846	0.000783453
RGU294225N0925595E	RGS294225N0925595E	20200818	Google Earth	Complex	Talus-connected	Geomorphological	Active	Extended	Mono-unit	0.0201083	0.156566	4861.32	4728	323.231	1.23653	0.326702	R2	NE	15.9833	29.2233	92.5635	0.00121193	0.0024312
RGU294209N0925613E	RGS294209N0925613E	20200818	Google Earth	Complex	Debris-mantled slope-connected	Geomorphological	Transitional	Extended	Mono-unit	0.00918396	0.0506366	4991.94	4968	314.378	0.64543	1.36267	R2	NW	14.7233	29.2434	92.5709	0.000424668	0.000627394
RGU292233N0925635E	RGS292233N0925635E	20200818	Google Earth	Simple	Debris-mantled slope-connected	Geomorphological	Transitional	Extended	Mono-unit	0.00568878	0.0226246	5212.38	5181	355.237	0.48878	-2.2575	R2	W	29.6635	29.2524	92.5554	9.74392e-05	0.000238604
RGU292434N0925709E	RGS292434N0925709E	20200818	Google Earth	Complex	Talus-connected	Geomorphological	Active	Extended	Mono-unit	0.0168319	0.138841	5144.72	5071	353.605	0.194748	-2.15085	R2	SW	19.0666	29.2485	92.5505	0.000905913	0.00210476
RGU292524N0925554E	RGS292524N0925554E	20200818	Google Earth	Simple	Talus-connected	Geomorphological	Transitional	Extended	Mono-unit	0.0132738	0.0695121	5132.46	5031	353.145	0.40722	-2.07841	R2	W	18.3111	29.2443	92.5514	0.000471589	0.000917603
RGU292485N0925505E	RGS292485N0925505E	20200818	Google Earth	Complex	Talus-connected	Geomorphological	Active	Extended	Mono-unit	0.0226037	0.153775	4988.23	4863	335.795	0.250679	-0.757579	R2	W	15.0952	29.2436	92.5467	0.00125858	0.00237928
RGU292443N0925514E	RGS292443N0925514E	20200818	Google Earth	Complex	Debris-mantled slope-connected	Geomorphological	Transitional	Extended	Mono-unit	0.0128201	0.0904284	4913.32	4844	335.64	0.15883	-0.738213	R2	W	19.2779	29.2333	92.5475	0.000583806	0.0012582
RGU292436N0925467E	RGS292436N0925467E	20200818	Google Earth	Complex	Talus-connected	Geomorphological	Active	Extended	Mono-unit	0.0147103	0.129608	5066.23	4992	343.146	0.503176	-1.36907	R2	NW	22.2369	29.2249	92.5505	0.000729983	0.00193794
RGU292333N0925475E	RGS292333N0925475E	20200818	Google Earth	Complex	Debris-mantled slope-connected	Geomorphological	Transitional	Extended	Mono-unit	0.00955891	0.0359834	5184.46	5103	341.098	0.78689	-1.28374	R2	NW	25.3849	29.2203	92.5506	0.000178907	0.000416394
RGU292249N0925505E	RGS292249N0925505E	20200818	Google Earth	Simple	Talus-connected	Geomorphological	Active	Extended	Mono-unit	0.00540121	0.0212566	5183.88	5153	338.404	0.36377	-1.02995	R2	NE	29.1276	29.2171	92.5413	9.30807e-05	0.000221399
RGU292171N0925413E	RGS292194N0925469E	20200818	Google Earth	Simple	Talus-connected	Geomorphological	Relict	Extended	Multi-unit	0.00978383	0.061632	5109.73	5061	338.404	0.57533	-1.02995	R2	NE	13.485	29.2167	92.5443
RGU292203N0925506E	RGS292194N0925469E	20200818	Google Earth	Complex	Talus-connected	Geomorphological	Transitional	Extended	Multi-unit	0.0135431	0.0619948	5080.03	5041	342.147	0.78689	-1.41658	R2	NW	14.4283	29.2194	92.5468	0.000530322	0.00079985
RGU292167N0925443E	RGS292167N0925443E	20200818	Google Earth	Simple	Talus-connected	Geomorphological	Active	Extended	Mono-unit	0.0115793	0.0750443	5220.19	5114	337.125	0.36377	-1.21261	R2	E	24.38	29.219	92.5398	0.000387497	0.00100592
RGU292194N0925468E	RGS292194N0925468E	20200818	Google Earth	Simple	Debris-mantled slope-connected	Geomorphological	Active	Extended	Mono-unit	0.00806333	0.0462149	4981.69	4937	356.32	0.41542	-2.47472	R2	E	18.8747	29.2261	92.5438	0.000304498	0.000562239
RGU292190N0925398E	RGS292190N0925398E	20200818	Google Earth	Complex	Talus-connected	Geomorphological	Transitional	Extended	Mono-unit	0.0341265	0.280718	4778.43	4682	333.016	0.0358405	-0.575291	R2	N	14.1286	29.2371	92.5366	0.00245121	0.004899
RGU292261N0925438E	RGS292261N0925438E	20200818	Google Earth	Simple	Talus-connected	Geomorphological	Active	Extended	Mono-unit	0.0133593	0.0719178	5007.6	4919	342.434	0.38889	-1.33388	R2	SW	18.555	29.2301	92.5378	0.000481718	0.000955842
RGU292371N0925366E	RGS292371N0925366E	20200818	Google Earth	Simple	Debris-mantled slope-connected	Geomorphological	Transitional	Extended	Mono-unit	0.0130251	0.082477	4928.21	4875	340.514	0.0501098	-1.20938	R2	N	16.8504	29.2299	92.5321	0.000606457	0.00112663
RGU292301N0925378E	RGS292301N0925378E	20200818	Google Earth	Simple	Talus-connected	Geomorphological	Active	Extended	Mono-unit	0.0145072	0.077303	4833.82	4760	329	1.16475	-0.42552	R2	N	19.4305	29.2053	92.5404	0.000495298	0.00104236
RGU292299N0925321E	RGS292299N0925321E	20181114	Google Earth	Complex	Debris-mantled slope-connected	Geomorphological	Active	Extended	Mono-unit	0.0113561	0.0440834	5160.43	5106	336.945	-0.0901967	0.0347122	R2	NE	20.0007	29.4623	92.5741	0.000274717	0.000531267
RGU294623N0925741E	RGS294437N0925761E	20090216	Google Earth	Simple	Glacier forefield-connected	Geomorphological	Relict	Extended	Multi-unit	0.0146695	0.104433	5040.33	4921	358.884	-1.5151	-1.95031	R2	NW	23.1925	29.4433	92.5761
RGU294674N0925765E	RGS294437N0925761E	20090216	Google Earth	Complex	Debris-mantled slope-connected	Geomorphological	Relict	Extended	Multi-unit	0.00890169	0.0411822	5217.5	5185	365.61	-1.44172	-2.4465	R2	W	14.3081	29.44	92.5817
RGU294433N0925761E	RGS294437N0925761E	20090216	Google Earth	Complex	Debris-mantled slope-connected	Geomorphological	Relict	Extended	Multi-unit	0.00693629	0.0322853	5191.05	5158	362.413	-1.33945	-2.18166	R2	N	14.8577	29.4397	92.5792
RGU294400N0925817E	RGS294437N0925761E	20090216	Google Earth	Complex	Glacier forefield-connected	Geomorphological	Relict	Extended	Multi-unit	0.0102976	0.0507159	5246.79	5226	365.61	-0.970515	-2.4465	R2	N	11.7578	29.4381	92.5816
RGU294397N0925792E	RGS294405N0925713E	20181114	Google Earth	Simple	Debris-mantled slope-connected	Geomorphological	Transitional	Extended	Multi-unit	0.00705486	0.0328785	5086.39	5035	359.216	-0.41103	-1.977	R2	NW	18.9188	29.4404	92.5718	0.000216141	0.000373661
RGU294381N0925816E	RGS294405N0925713E	20181114	Google Earth	Simple	Debris-mantled slope-connected	Geomorphological	Transitional	Extended	Multi-unit	0.00943033	0.0518551	5140.78	5095	359.384	-0.896757	-1.98391	R2	W	14.8456	29.4378	92.5728	0.000431382	0.000645554
RGU294404N0925718E	RGS294405N0925713E	20181114	Google Earth	Complex	Glacier forefield-connected	Geomorphological	Relict	Extended	Multi-unit	0.0208341	0.224055	5248.25	5150	363.954	-0.937218	-2.38897	R2	N	14.1295	29.4331	92.5745
RGU294378N0925728E	RGS294405N0925713E	20181114	Google Earth	Complex	Glacier forefield-connected	Geomorphological	Relict	Extended	Multi-unit	0.0109259	0.0669624	5344.97	5299	373.769	-1.25618	-3.14682	R2	NW	15.6636	29.4305	92.5805
RGU294331N0925745E	RGS294331N0925745E	20200818	Google Earth	Complex	Debris-mantled slope-connected	Geomorphological	Active	Extended	Mono-unit	0.0169538	0.158641	5230.55	5178	358.459	-0.107962	-2.56487	R2	NW	17.8636	29.287	92.5301	0.00110231	0.00246991
RGU294305N0925805E	RGS294305N0925805E	20090216	Google Earth	Complex	Talus-connected	Geomorphological	Active	Extended	Mono-unit	0.0294847	0.206626	5219.43	5028	365.728	-1.37326	-2.4646	R2	NW	16.9922	29.4117	92.5898	0.00150702	0.00339159
RGU292870N0925301E	RGS292870N0925301E	20090216	Google Earth	Complex	Debris-mantled slope-connected	Geomorphological	Active	Extended	Mono-unit	0.00631771	0.0216791	5209.54	5186	360.356	-1.4439	-2.05881	R2	W	16.1997	29.4185	92.5826	0.000165628	0.00022669
RGU294117N0925898E	RGS294117N0925898E	20090216	Google Earth	Simple	Glacier forefield-connected	Geomorphological	Active	Extended	Mono-unit	0.0107011	0.0597864	5244.93	5208	360.428	-1.45039	-2.05642	R2	S	13.0137	29.4204	92.5834	0.0005659	0.000765783
RGU294185N0925826E	RGS294185N0925826E	20090216	Google Earth	Complex	Glacier forefield-connected	Geomorphological	Active	Extended	Mono-unit	0.00770041	0.0264633	5338.22	5304	360.428	-1.6643	-2.05642	R2	SE	16.5985	29.4232	92.585	0.000197454	0.000287975
RGU294204N0925834E	RGS294204N0925834E	20090216	Google Earth	Complex	Glacier forefield-connected	Geomorphological	Active	Extended	Mono-unit	0.017131	0.195168	5170.81	5059	368.141	-0.845608	-2.93878	R2	NE	22.6141	29.3727	92.5748	0.00108184	0.00316717
RGU294232N0925850E	RGS294232N0925850E	20191126	Google Earth	Simple	Talus-connected	Geomorphological	Active	Extended	Mono-unit	0.0106401	0.0563273	5408.41	5331	362.068	-0.69361	-2.30678	R2	S	17.0037	29.3832	92.5814	0.000410552	0.000712928
RGU293727N0925748E	RGS293727N0925748E	20191126	Google Earth	Complex	Debris-mantled slope-connected	Geomorphological	Active	Extended	Mono-unit	0.0133357	0.0862618	5299.34	5255	369.183	-0.69361	-2.99848	R2	SW	20.7463	29.3793	92.5798	0.000519049	0.00118895
RGU293832N0925814E	RGS293832N0925814E	20120109	Google Earth	Simple	Glacier forefield-connected	Geomorphological	Active	Extended	Mono-unit	0.0238325	0.188974	5118.02	4935	357.345	-0.10777	-1.95884	R2	NW	23.0942	29.3901	92.5788	0.00102688	0.00304695
RGU293793N0925798E	RGS293793N0925798E	20120109	Google Earth	Simple	Debris-mantled slope-connected	Geomorphological	Active	Extended	Mono-unit	0.00519613	0.0200445	5206.65	5182	353.598	-0.829	-1.75525	R2	SW	16.9838	29.3599	92.5732	0.000146265	0.000206337
RGU293901N0925788E	RGS293901N0925788E	20120109	Google Earth	Complex	Talus-connected	Geomorphological	Active	Extended	Mono-unit	0.0104447	0.0610459	5117.99	5070	356.778	-0.778207	-1.94979	R2	W	21.6484	29.3574	92.5836	0.000352706	0.000785182
RGU293599N0925732E	RGS293599N0925732E	20120109	Google Earth	Simple	Debris-mantled slope-connected	Geomorphological	Active	Extended	Mono-unit	0.00699484	0.0300192	5020.37	4986	357.819	-0.18142	-2.16708	R2	NW	18.9777	29.3253	92.5804	0.000196754	0.000335012
RGU293574N0925836E	RGS293574N0925836E	20120109	Google Earth	Simple	Debris-mantled slope-connected	Geomorphological	Active	Extended	Mono-unit	0.0169039	0.155889	4997.36	4952	347.657	0.723472	-1.30116	R2	N	19.6535	29.3339	92.5872	0.000987926	0.00241858
RGU293253N0925804E	RGS293253N0925804E	20120109	Google Earth	Complex	Talus-connected	Geomorphological	Active	Extended	Mono-unit	0.0106547	0.0858042	5145.74	5115	367.477	-0.881541	-3.15523	R2	NE	16.3958	29.3262	92.5536	0.000647913	0.00118139
RGU293339N0925872E	RGS293339N0925872E	20090216	Google Earth	Simple	Debris-mantled slope-connected	Geomorphological	Active	Extended	Mono-unit	0.00547588	0.0236484	5216.43	5189	351.274	0.080981	-1.73969	R2	NW	24.7986	29.2885	92.5774	0.000120176	0.00025162
RGU293262N0925536E	RGS293262N0925536E	20090216	Google Earth	Complex	Glacier forefield-connected	Geomorphological	Active	Extended	Mono-unit	0.0121355	0.0643011	5147.73	5103	356.736	0.245029	-2.11008	R2	NE	18.1504	29.2982	92.5837	0.000439965	0.000835688
RGU292885N0925774E	RGS292885N0925774E	20090216	Google Earth	Complex	Talus-connected	Geomorphological	Active	Extended	Mono-unit	0.0287274	0.153359	5090.11	4958	348.681	0.193376	-1.5081	R2	NE	17.7783	29.2791	92.5854	0.00107055	0.00237155
RGU292982N0925837E	RGS292982N0925837E	20090216	Google Earth	Simple	Debris-mantled slope-connected	Geomorphological	Active	Extended	Mono-unit	0.00704468	0.0373849	4903.68	4878	354.936	-0.24913	-1.65669	R2	N	15.6196	29.3992	92.5816	0.000295949	0.000435931
RGU293992N0925816E	RGS293992N0925816E	20090216	Google Earth	Complex	Debris-mantled slope-connected	Geomorphological	Relict	Extended	Mono-unit	0.015625	0.0872387	4743.53	4679	303.214	-0.470951	0.531062	R1	NW	19.2455	29.2931	92.2707
RGU292931N0922707E	RGS292931N0922707E	20090216	Google Earth	Simple	Debris-mantled slope-connected	Geomorphological	Relict	Extended	Mono-unit	0.0113466	0.0587564	4530.71	4455	302.048	1.3382	0.687968	R1	N	20.5224	29.3055	92.2713
RGU292840N0922713E	RGS292840N0922713E	20090216	Google Earth	Complex	Talus-connected	Geomorphological	Active	Extended	Mono-unit	0.0149033	0.138598	5166.02	5050	336.568	-1.12701	-2.19634	R1	N	21.9477	29.2792	92.2764	0.000790387	0.00210034
RGU293055N0922713E	RGS293055N0922713E	20090216	Google Earth	Simple	Glacier forefield-connected	Geomorphological	Active	Extended	Mono-unit	0.037719	0.581318	4949.57	4791	325.584	-0.970625	-1.24809	R1	N	16.8917	29.2908	92.2816	0.00426432	0.0117349
RGU292792N0922764E	RGS292792N0922764E	20090216	Google Earth	Simple	Debris-mantled slope-connected	Geomorphological	Active	Extended	Mono-unit	0.00704046	0.0295464	5286.28	5243	336.588	-1.2643	-2.18296	R1	SW	19.8536	29.2782	92.2809	0.000185435	0.000328691
RGU292908N0922816E	RGS292908N0922816E	20191119	Google Earth	Complex	Talus-connected	Geomorphological	Active	Extended	Mono-unit	0.00867784	0.0299876	4811.06	4777	311.978	-0.14541	-0.0289217	R1	N	20.4019	29.3012	92.2819	0.000183352	0.00033459
RGU293012N0922819E	RGS293012N0922819E	20191119	Google Earth	Complex	Talus-connected	Geomorphological	Active	Extended	Mono-unit	0.00554386	0.0182985	4889.91	4866	325.285	-0.14541	-1.03323	R1	N	19.458	29.2993	92.2851	0.000117083	0.000184961
RGU293001N0922838E	RGS293001N0922838E	20090216	Google Earth	Complex	Debris-mantled slope-connected	Geomorphological	Relict	Extended	Mono-unit	0.00818095	0.0281635	4525.64	4475	293.131	0.462753	1.45081	R1	NW	18.2797	29.3092	92.2771
RGU292993N0922851E	RGS292993N0922851E	20090216	Google Earth	Complex	Debris-mantled slope-connected	Geomorphological	Relict	Extended	Mono-unit	0.0106413	0.048355	4650.65	4581	307.134	0.13446	0.337843	R1	NW	20.6867	29.3076	92.2806
RGU293092N0922771E	RGS293092N0922771E	20090216	Google Earth	Complex	Debris-mantled slope-connected	Geomorphological	Relict	Extended	Mono-unit	0.00973683	0.0437226	4688.17	4633	312.753	0.13446	-0.121787	R1	N	18.5177	29.3083	92.2832
RGU293076N0922806E	RGS293076N0922806E	20090216	Google Earth	Complex	Debris-mantled slope-connected	Geomorphological	Active	Extended	Mono-unit	0.0059441	0.0201384	4730.83	4704	315.386	0.13446	-0.322333	R1	NW	20.0604	29.3071	92.2837	0.00012514	0.000207498
RGU293071N0922837E	RGS293071N0922837E	20090216	Google Earth	Complex	Talus-connected	Geomorphological	Active	Extended	Mono-unit	0.00754847	0.0189378	4861.76	4836	315.386	-0.388317	-0.322333	R1	W	14.926	29.3014	92.286	0.000156714	0.000192743
RGU293080N0922857E	RGS293080N0922857E	20090216	Google Earth	Complex	Talus-connected	Geomorphological	Active	Extended	Mono-unit	0.0170018	0.113625	4970.03	4873	326.848	-1.18792	-1.28673	R1	NW	20.0848	29.2963	92.2903	0.000705241	0.00165483
RGU293014N0922860E	RGS293014N0922860E	20090216	Google Earth	Simple	Glacier forefield-connected	Geomorphological	Active	Extended	Mono-unit	0.01701	0.120385	5183.05	5057	339.409	-1.4354	-2.33888	R1	SW	20.8056	29.2886	92.2902	0.000722401	0.00177366
RGU292963N0922903E	RGS292963N0922903E	20090216	Google Earth	Simple	Talus-connected	Geomorphological	Active	Extended	Mono-unit	0.0232227	0.17695	5190.3	5016	319.155	-0.463595	-0.848232	R1	SW	19.3162	29.2698	92.2924	0.00114021	0.0028158
RGU292886N0922902E	RGS292886N0922902E	20090216	Google Earth	Simple	Glacier forefield-connected	Geomorphological	Active	Extended	Mono-unit	0.00717649	0.0382191	5168.22	5148	325.975	-1.41082	-1.19575	R1	NE	16.2453	29.2932	92.2937	0.000291197	0.00044763
RGU292698N0922924E	RGS292698N0922924E	20090216	Google Earth	Complex	Glacier forefield-connected	Geomorphological	Transitional	Extended	Mono-unit	0.011956	0.101185	5109.78	5053	326.007	-1.2142	-1.19575	R1	W	15.0267	29.296	92.2933	0.000831842	0.00143986
RGU292932N0922937E	RGS292932N0922937E	20090216	Google Earth	Simple	Talus-connected	Geomorphological	Active	Extended	Mono-unit	0.0273753	0.261048	5141.39	4941	320.747	-0.259228	-0.837857	R1	SW	18.9319	29.2653	92.2972	0.00171497	0.00449001
RGU292653N0922972E	RGS292653N0922972E	20090216	Google Earth	Complex	Debris-mantled slope-connected	Geomorphological	Transitional	Extended	Mono-unit	0.0196768	0.120005	4797.31	4686	304.902	-0.50604	0.673746	R1	W	17.2964	29.3189	92.3005	0.000860321	0.00176695
RGU293111N0922978E	RGS293111N0922978E	20090216	Google Earth	Simple	Debris-mantled slope-connected	Geomorphological	Relict	Extended	Mono-unit	0.00667864	0.0163644	5046.5	4980	308.131	1.0043	0.130962	R1	SW	32.092	29.2526	92.2997
RGU293189N0923005E	RGS293189N0923005E	20090216	Google Earth	Simple	Talus-connected	Geomorphological	Relict	Extended	Mono-unit	0.0155682	0.138119	5106.98	5017	317.955	1.0043	-0.583476	R1	SW	18.4159	29.2554	92.3006
RGU292526N0922997E	RGS292526N0922997E	20090216	Google Earth	Simple	Glacier forefield-connected	Geomorphological	Active	Extended	Mono-unit	0.0420893	0.58375	4947.48	4689	346.128	-0.493443	-2.57082	R1	N	18.5447	29.3219	92.3148	0.00391214	0.0117938
RGU292554N0923006E	RGS292554N0923006E	20090216	Google Earth	Simple	Debris-mantled slope-connected	Geomorphological	Active	Extended	Mono-unit	0.00443841	0.0111495	4931.5	4896	340.618	-0.50604	-2.24441	R1	NW	29.2436	29.3151	92.3027	4.86459e-05	0.000102068
RGU293219N0923148E	RGS293219N0923148E	20090216	Google Earth	Simple	Glacier forefield-connected	Geomorphological	Active	Extended	Mono-unit	0.0324805	0.394788	5022.46	4790	339.932	-0.623718	-2.17059	R1	W	19.8305	29.3093	92.3057	0.00248048	0.00737596
RGU293151N0923027E	RGS293151N0923027E	20090216	Google Earth	Complex	Glacier forefield-connected	Geomorphological	Active	Extended	Mono-unit	0.0108733	0.0690807	5284.54	5240	358.289	-0.874244	-3.70012	R1	N	13.2725	29.2997	92.3061	0.000641349	0.000910773
RGU293093N0923057E	RGS293093N0923057E	20090216	Google Earth	Complex	Talus-connected	Geomorphological	Active	Extended	Mono-unit	0.0202796	0.178298	5066.99	4890	337.135	-0.798367	-1.97297	R1	N	22.6134	29.3035	92.3008	0.000988354	0.00284156
RGU292997N0923061E	RGS292997N0923061E	20090216	Google Earth	Complex	Glacier forefield-connected	Geomorphological	Active	Extended	Mono-unit	0.013685	0.134554	5259.61	5203	332.502	0.71579	-1.73449	R1	E	16.1251	29.2643	92.3133	0.00103262	0.00202703
RGU293035N0923008E	RGS293035N0923008E	20090216	Google Earth	Complex	Talus-connected	Geomorphological	Active	Extended	Mono-unit	0.0162734	0.146374	5325.12	5224	336.976	0.948576	-2.15068	R1	NE	16.1695	29.2593	92.3117	0.00112033	0.00224253
RGU292643N0923133E	RGS292643N0923133E	20090216	Google Earth	Complex	Glacier forefield-connected	Geomorphological	Active	Extended	Mono-unit	0.0142384	0.0895371	5403.45	5362	340.294	-0.396113	-2.37678	R1	E	15.5948	29.2694	92.3078	0.0007099	0.00124333
RGU292593N0923117E	RGS292593N0923117E	20090216	Google Earth	Simple	Talus-connected	Geomorphological	Active	Extended	Mono-unit	0.00626216	0.0302897	5402.32	5360	340.294	-0.24169	-2.37678	R1	SW	17.9469	29.2701	92.3113	0.000209521	0.000338638
RGU292694N0923078E	RGS292694N0923078E	20090216	Google Earth	Simple	Debris-mantled slope-connected	Geomorphological	Active	Extended	Mono-unit	0.00804034	0.0446742	5311.5	5249	334.125	-0.24169	-1.85217	R1	SE	22.7573	29.2682	92.313	0.000246158	0.000539822
RGU292701N0923113E	RGS292701N0923113E	20090216	Google Earth	Simple	Glacier forefield-connected	Geomorphological	Active	Extended	Mono-unit	0.00880145	0.0391293	5142.04	5083	356.341	-0.784698	-3.52869	R1	N	19.756	29.3033	92.3045	0.000246741	0.000460453
RGU292682N0923130E	RGS292682N0923130E	20090216	Google Earth	Simple	Glacier forefield-connected	Geomorphological	Active	Extended	Mono-unit	0.00811647	0.0457759	5129.76	5110	352.098	-0.67802	-3.08995	R1	N	12.1148	29.3191	92.3202	0.000464902	0.000555836
RGU293033N0923045E	RGS293033N0923045E	20090216	Google Earth	Simple	Glacier forefield-connected	Geomorphological	Active	Extended	Mono-unit	0.00725912	0.0352461	5295.5	5263	348.165	-0.048534	-2.72435	R1	N	16.4348	29.3227	92.3292	0.000265532	0.000406178
RGU293191N0923202E	RGS293191N0923202E	20090216	Google Earth	Complex	Glacier forefield-connected	Geomorphological	Active	Extended	Mono-unit	0.0152557	0.102231	5151.87	5066	349.989	-0.126622	-2.87701	R1	W	16.1661	29.3219	92.3226	0.000782627	0.00145775
RGU293227N0923292E	RGS293227N0923292E	20090216	Google Earth	Simple	Glacier forefield-connected	Geomorphological	Active	Extended	Mono-unit	0.0194169	0.0985119	5160.66	5036	349.426	0.021222	-2.8475	R1	W	15.5875	29.3245	92.3235	0.000781412	0.00139434
RGU293219N0923226E	RGS293219N0923226E	20090216	Google Earth	Complex	Glacier forefield-connected	Geomorphological	Active	Extended	Mono-unit	0.0252414	0.381333	5044.64	4932	333.262	0.61646	-1.68656	R1	E	16.685	29.2796	92.3232	0.00283096	0.00707535
RGU293245N0923235E	RGS293245N0923235E	20090216	Google Earth	Complex	Talus-connected	Geomorphological	Active	Extended	Mono-unit	0.026621	0.192515	4998.66	4809	328.969	0.865143	-1.3426	R1	N	20.7629	29.275	92.3251	0.00115751	0.00311559
RGU292796N0923232E	RGS292796N0923232E	20090216	Google Earth	Simple	Talus-connected	Geomorphological	Active	Extended	Mono-unit	0.0343237	0.331561	5023.13	4811	319.859	1.41225	-0.623821	R1	NE	17.7499	29.2672	92.3269	0.00231811	0.00598216
RGU292750N0923251E	RGS292750N0923251E	20090216	Google Earth	Complex	Talus-connected	Geomorphological	Active	Extended	Mono-unit	0.0244776	0.142213	5213.48	5068	330.961	0.954521	-1.57744	R1	S	23.6119	29.2649	92.3181	0.000756779	0.00216625
RGU292672N0923269E	RGS292672N0923269E	20090216	Google Earth	Simple	Talus-connected	Geomorphological	Transitional	Extended	Mono-unit	0.0197744	0.14389	5067.22	4915	326.616	1.93574	-1.20611	R1	E	20.7076	29.2574	92.3192	0.00086735	0.00219694
RGU292649N0923181E	RGS292649N0923181E	20090216	Google Earth	Simple	Debris-mantled slope-connected	Geomorphological	Active	Extended	Mono-unit	0.0289278	0.291817	5025.43	4912	327.783	0.684153	-1.18274	R1	NE	15.15	29.2961	92.3327	0.00237996	0.00513235
RGU292574N0923192E	RGS292574N0923192E	20090216	Google Earth	Simple	Talus-connected	Geomorphological	Active	Extended	Mono-unit	0.0143857	0.116788	5152.75	5064	333.605	0.717649	-1.52578	R1	E	18.3242	29.3132	92.3356	0.000791773	0.00171025
RGU292961N0923327E	RGS292961N0923327E	20090216	Google Earth	Simple	Talus-connected	Geomorphological	Active	Extended	Mono-unit	0.0172512	0.120783	5206.68	5153	337.486	0.73059	-1.88095	R1	NE	10.2212	29.3125	92.3322	0.0014508	0.00178069
RGU293132N0923356E	RGS293132N0923356E	20090216	Google Earth	Simple	Talus-connected	Geomorphological	Active	Extended	Mono-unit	0.00690533	0.0315687	5125.05	5071	333.605	0.75887	-1.52578	R1	E	26.3794	29.3114	92.3368	0.000151441	0.00035587
RGU293125N0923322E	RGS293125N0923322E	20090216	Google Earth	Simple	Debris-mantled slope-connected	Geomorphological	Active	Extended	Mono-unit	0.00772241	0.036658	5328.91	5307	347.421	0.70663	-2.61308	R1	E	14.3173	29.3192	92.3354	0.000315962	0.000425779
RGU293114N0923368E	RGS293114N0923368E	20090216	Google Earth	Simple	Debris-mantled slope-connected	Geomorphological	Transitional	Extended	Mono-unit	0.0324937	0.31596	5112.59	4966	328.434	0.486596	-1.08732	R1	E	16.3227	29.3162	92.3456	0.00239623	0.005646
RGU293192N0923354E	RGS293192N0923354E	20090216	Google Earth	Complex	Talus-connected	Geomorphological	Active	Extended	Mono-unit	0.0173522	0.130776	5161.64	5100	333.202	0.450651	-1.42719	R1	SE	14.5338	29.3249	92.3459	0.00111075	0.00195892
RGU293162N0923456E	RGS293162N0923456E	20090216	Google Earth	Complex	Debris-mantled slope-connected	Geomorphological	Transitional	Extended	Mono-unit	0.0211516	0.175259	4882.15	4606	328.398	-0.268146	-1.17627	R1	NW	28.2914	29.3331	92.3212	0.000788166	0.00278354
RGU293249N0923459E	RGS293249N0923459E	20090216	Google Earth	Complex	Glacier forefield-connected	Geomorphological	Transitional	Extended	Mono-unit	0.0359093	0.472647	5036.06	4838	332.57	-0.189415	-1.43988	R1	N	13.4844	29.3316	92.3309	0.00432037	0.00915435
RGU293331N0923212E	RGS293331N0923212E	20090216	Google Earth	Simple	Glacier forefield-connected	Geomorphological	Relict	Extended	Mono-unit	0.0279779	0.229765	4900.71	4715	325.465	-0.12864	-0.80828	R1	N	14.6465	29.341	92.3364
RGU293316N0923309E	RGS293316N0923309E	20090216	Google Earth	Simple	Glacier forefield-connected	Geomorphological	Active	Extended	Mono-unit	0.0177732	0.168249	5044.55	4998	337.377	-0.116176	-1.78507	R1	NE	16.2153	29.3329	92.3383	0.00128421	0.00265048
RGU293410N0923364E	RGS293410N0923364E	20200818	Google Earth	Complex	Glacier forefield-connected	Geomorphological	Transitional	Extended	Mono-unit	0.0207086	0.220328	5049.67	4993	337.489	-0.088163	-1.72582	R1	NW	11.461	29.337	92.3444	0.00236343	0.00366324
RGU293329N0923383E	RGS293329N0923383E	20200818	Google Earth	Simple	Debris-mantled slope-connected	Geomorphological	Transitional	Extended	Mono-unit	0.00647939	0.0188742	4906.05	4873	331.038	-0.10578	-1.23324	R1	NW	17.0578	29.3446	92.3434	0.000137145	0.000191966
RGU293370N0923444E	RGS293370N0923444E	20090216	Google Earth	Complex	Glacier forefield-connected	Geomorphological	Active	Extended	Mono-unit	0.0151938	0.131603	5114.63	5070	334.905	0.146125	-1.52808	R1	N	10.09	29.3381	92.35	0.0016011	0.00197379
RGU293446N0923434E	RGS293446N0923434E	20090216	Google Earth	Complex	Talus-connected	Geomorphological	Active	Extended	Mono-unit	0.014176	0.0702029	5018.47	4973	332.116	0.51615	-1.2726	R1	W	21.2541	29.3432	92.3497	0.000412779	0.000928557
RGU293381N0923500E	RGS293381N0923500E	20090216	Google Earth	Complex	Glacier forefield-connected	Geomorphological	Active	Extended	Mono-unit	0.0361782	0.455508	5027.85	4899	333.471	0.488617	-1.35913	R1	N	13.4752	29.3447	92.3543	0.00416649	0.00875746
RGU293432N0923497E	RGS293432N0923497E	20090216	Google Earth	Complex	Glacier forefield-connected	Geomorphological	Active	Extended	Mono-unit	0.021893	0.176095	4999.94	4909	330.242	0.256515	-1.07069	R1	NE	16.2753	29.3494	92.3617	0.00133929	0.00279949
RGU293447N0923543E	RGS293447N0923543E	20191119	Google Earth	Simple	Debris-mantled slope-connected	Geomorphological	Active	Extended	Mono-unit	0.00624818	0.0287464	4608.94	4550	339.518	0.0463698	-1.75938	R1	NE	30.4617	29.357	92.367	0.00012086	0.00031804
RGU293494N0923617E	RGS293494N0923617E	20191119	Google Earth	Simple	Debris-mantled slope-connected	Geomorphological	Active	Extended	Mono-unit	0.00544331	0.0124291	4736.92	4714	349.585	0.16541	-2.29559	R1	N	35.2495	29.3542	92.3712	4.59026e-05	0.000116282
RGU293570N0923670E	RGS293570N0923670E	20090216	Google Earth	Simple	Debris-mantled slope-connected	Geomorphological	Active	Extended	Mono-unit	0.00605456	0.0219737	5412.44	5390	346.918	0.20466	-2.71662	R1	E	17.3315	29.3087	92.3241	0.00015722	0.000230391
RGU293542N0923712E	RGS293542N0923712E	20090216	Google Earth	Simple	Debris-mantled slope-connected	Geomorphological	Active	Extended	Mono-unit	0.0114591	0.044848	5279.51	5211	348.186	0.393091	-2.82187	R1	SE	22.2201	29.3054	92.3273	0.000252777	0.000542343
RGU293087N0923241E	RGS293087N0923241E	20090216	Google Earth	Simple	Debris-mantled slope-connected	Geomorphological	Active	Extended	Mono-unit	0.00478203	0.0161607	5279.6	5251	341.866	1.0015	-2.33574	R1	N	19.0662	29.2915	92.3263	0.000105448	0.000159344
RGU293054N0923273E	RGS293054N0923273E	20090216	Google Earth	Simple	Debris-mantled slope-connected	Geomorphological	Active	Extended	Mono-unit	0.014205	0.118498	5166.97	5063	328.197	1.0015	-1.10618	R1	SE	21.4045	29.2867	92.3234	0.000692075	0.00174034
RGU292915N0923263E	RGS292915N0923263E	20090216	Google Earth	Simple	Debris-mantled slope-connected	Geomorphological	Active	Extended	Mono-unit	0.00909265	0.0396495	5012.43	4974	317.425	1.2069	-0.421284	R1	SE	14.015	29.285	92.3315	0.000348966	0.000467809
RGU292867N0923234E	RGS292867N0923234E	20090216	Google Earth	Complex	Debris-mantled slope-connected	Geomorphological	Active	Extended	Mono-unit	0.012891	0.0565119	4945.39	4862	309.67	1.1982	0.284807	R1	E	22.4104	29.2872	92.3362	0.000315951	0.000715732
RGU292850N0923315E	RGS292850N0923315E	20090216	Google Earth	Simple	Glacier forefield-connected	Geomorphological	Relict	Extended	Mono-unit	0.0101669	0.0583603	4896.97	4817	316.653	0.54503	-0.253808	R1	E	22.5411	29.2992	92.3415
RGU292872N0923362E	RGS292872N0923362E	20090216	Google Earth	Complex	Glacier forefield-connected	Geomorphological	Relict	Extended	Mono-unit	0.0250376	0.262373	4975.68	4835	328.43	0.355529	-1.19094	R1	E	16.2682	29.3044	92.3404
RGU292992N0923415E	RGS292992N0923415E	20090216	Google Earth	Complex	Talus-connected	Geomorphological	Active	Extended	Mono-unit	0.00882279	0.0457701	5259.79	5200	330.617	0.282592	-1.08528	R1	E	18.9566	29.3389	92.3677	0.000300312	0.000555752
RGU293044N0923404E	RGS293044N0923404E	20200818	Google Earth	Complex	Debris-mantled slope-connected	Geomorphological	Relict	Extended	Mono-unit	0.015393	0.0851855	4902.3	4819	313.295	-0.373782	0.122297	R1	NW	20.3538	29.2974	92.3567
RGU293389N0923677E	RGS293389N0923677E	20200818	Google Earth	Simple	Debris-mantled slope-connected	Geomorphological	Relict	Extended	Mono-unit	0.00890019	0.0357899	4527.55	4470	286.007	0.50295	2.33182	R1	SW	22.7815	29.277	92.351
RGU292974N0923567E	RGS292974N0923567E	20200818	Google Earth	Complex	Talus-connected	Geomorphological	Active	Extended	Mono-unit	0.0190571	0.139727	5039.54	4965	331.099	1.05886	-1.27567	R1	W	20.0372	29.2816	92.3657	0.000869219	0.00212089
RGU292770N0923510E	RGS292770N0923510E	20200818	Google Earth	Simple	Debris-mantled slope-connected	Geomorphological	Relict	Extended	Mono-unit	0.0052727	0.020159	4732.12	4682	303.501	0.50295	0.894317	R1	SW	24.7027	29.2792	92.3547
RGU292816N0923657E	RGS292816N0923657E	20200818	Google Earth	Simple	Talus-connected	Geomorphological	Active	Extended	Mono-unit	0.00923613	0.0474086	5006.71	4958	331.822	0.1106	-1.30143	R1	NW	22.376	29.2865	92.3644	0.000265442	0.00057971
RGU292792N0923547E	RGS292792N0923547E	20200818	Google Earth	Simple	Talus-connected	Geomorphological	Active	Extended	Mono-unit	0.00649262	0.0304615	5064.15	5037	339.748	0.1106	-1.98696	R1	NW	21.1915	29.2865	92.3675	0.000179612	0.000340945
RGU292865N0923644E	RGS292865N0923644E	20200818	Google Earth	Complex	Glacier forefield-connected	Geomorphological	Active	Extended	Mono-unit	0.0333797	0.348621	5060.98	4909	327.402	0.109262	-0.991829	R1	W	13.1259	29.2934	92.3644	0.00327212	0.0063534
RGU292865N0923675E	RGS292865N0923675E	20200818	Google Earth	Complex	Glacier forefield-connected	Geomorphological	Active	Extended	Mono-unit	0.0366942	0.292857	4904.12	4661	315.389	1.479	-0.0251391	R1	W	18.7768	29.2742	92.3622	0.00193925	0.00515428
RGU292934N0923644E	RGS292934N0923644E	20200818	Google Earth	Complex	Glacier forefield-connected	Geomorphological	Active	Extended	Mono-unit	0.024957	0.275425	4851.96	4629	321.879	1.1471	-0.589382	R1	W	20.5809	29.2609	92.3641	0.00167	0.00478835
RGU292742N0923622E	RGS292742N0923622E	20090216	Google Earth	Simple	Glacier forefield-connected	Geomorphological	Active	Extended	Mono-unit	0.00997127	0.061125	5262.14	5220	335.586	0.166659	-1.71689	R1	W	16.994	29.2999	92.3801	0.000445768	0.000786404
RGU292609N0923641E	RGS292609N0923641E	20090216	Google Earth	Simple	Glacier forefield-connected	Geomorphological	Active	Extended	Mono-unit	0.00679227	0.0330639	5216.95	5177	335.713	-0.11244	-1.64899	R1	NW	19.2038	29.2955	92.3737	0.000214253	0.00037619
RGU292999N0923801E	RGS292999N0923801E	20090216	Google Earth	Complex	Talus-connected	Geomorphological	Transitional	Extended	Mono-unit	0.0135898	0.0925827	5073.35	4996	334.871	-0.25782	-1.51214	R1	SW	20.0796	29.3025	92.3732	0.000574778	0.00129425
RGU292955N0923737E	RGS292955N0923737E	20090216	Google Earth	Complex	Debris-mantled slope-connected	Geomorphological	Active	Extended	Mono-unit	0.0055245	0.0226453	5309.88	5292	345.351	-0.79693	-2.275	R1	NW	20.8194	29.3095	92.3894	0.000135803	0.000238868
RGU293025N0923732E	RGS293025N0923732E	20090216	Google Earth	Complex	Talus-connected	Geomorphological	Active	Extended	Mono-unit	0.0189326	0.140722	5058.05	4966	336.179	-0.324557	-1.63049	R1	N	19.3712	29.299	92.3696	0.000904293	0.00213903
RGU293095N0923894E	RGS293095N0923894E	20090216	Google Earth	Complex	Talus-connected	Geomorphological	Active	Extended	Mono-unit	0.0124037	0.0724893	4960.38	4938	326.216	-0.702442	-0.838221	R1	N	11.0882	29.3025	92.365	0.000803388	0.000964964
RGU292990N0923696E	RGS292990N0923696E	20090216	Google Earth	Complex	Talus-connected	Geomorphological	Active	Extended	Mono-unit	0.0123915	0.0913007	5081.5	5034	330.398	-1.22823	-1.1265	R1	N	19.053	29.3131	92.3707	0.000596134	0.00127278
RGU293025N0923650E	RGS293025N0923650E	20090216	Google Earth	Complex	Talus-connected	Geomorphological	Active	Extended	Mono-unit	0.0104844	0.0572433	4983.06	4957	348.025	-1.2138	-2.46078	R1	NE	15.3988	29.3154	92.375	0.000459491	0.000726862
RGU293131N0923707E	RGS293131N0923707E	20090216	Google Earth	Simple	Talus-connected	Geomorphological	Active	Extended	Mono-unit	0.012157	0.0749361	5064.77	4996	350.19	-1.20534	-2.66431	R1	N	19.1838	29.3123	92.3787	0.000486071	0.00100418
RGU293154N0923750E	RGS293154N0923750E	20090216	Google Earth	Complex	Talus-connected	Geomorphological	Active	Extended	Mono-unit	0.00748473	0.0288841	5017.59	4991	344.17	-1.4823	-2.26313	R1	W	18.9093	29.3179	92.3811	0.000189974	0.000319869
RGU293123N0923787E	RGS293123N0923787E	20090216	Google Earth	Simple	Glacier forefield-connected	Geomorphological	Active	Extended	Mono-unit	0.0186946	0.177431	5111.24	5015	348.395	-1.3018	-2.49188	R1	NW	14.4737	29.3167	92.3937	0.00151314	0.00282499
RGU293179N0923811E	RGS293179N0923811E	20090216	Google Earth	Simple	Talus-connected	Geomorphological	Active	Extended	Mono-unit	0.0113594	0.0936597	5090.34	5050	350.19	-1.34035	-2.66431	R1	NE	16.3532	29.3163	92.3903	0.000709026	0.00131234
RGU293167N0923937E	RGS293167N0923937E	20090216	Google Earth	Complex	Talus-connected	Geomorphological	Active	Extended	Mono-unit	0.0136272	0.113467	5076.55	5029	344.683	-1.4823	-2.20764	R1	NE	18.8128	29.3184	92.387	0.000749975	0.00165207
RGU293163N0923903E	RGS293163N0923903E	20090216	Google Earth	Complex	Talus-connected	Geomorphological	Active	Extended	Mono-unit	0.00913492	0.0326076	5039.49	5005	332.875	-1.4823	-1.27345	R1	W	14.4854	29.3201	92.3828	0.000277858	0.000369968
RGU293184N0923870E	RGS293184N0923870E	20090216	Google Earth	Complex	Talus-connected	Geomorphological	Active	Extended	Mono-unit	0.0129949	0.0570365	5262.21	5185	323.858	0.789862	-0.569454	R1	SW	23.8135	29.3031	92.4028	0.000301095	0.000723712
RGU293201N0923828E	RGS293201N0923828E	20090216	Google Earth	Simple	Debris-mantled slope-connected	Geomorphological	Active	Extended	Mono-unit	0.0215587	0.1311	4889.59	4672	306.42	1.19183	0.932876	R1	SW	28.6691	29.2923	92.3963	0.000582458	0.00196475
RGU293031N0924028E	RGS293031N0924028E	20090216	Google Earth	Complex	Glacier forefield-connected	Geomorphological	Active	Extended	Mono-unit	0.0112056	0.060759	5043.93	5008	335.517	-1.53756	-1.3926	R1	N	17.6079	29.3322	92.388	0.000428114	0.000780756
RGU292923N0923963E	RGS292923N0923963E	20090216	Google Earth	Complex	Glacier forefield-connected	Geomorphological	Active	Extended	Mono-unit	0.0188634	0.14125	5106.88	5030	344.306	-1.6726	-2.07151	R1	NW	16.7141	29.336	92.3948	0.00104684	0.00214866
RGU293322N0923880E	RGS293322N0923880E	20090216	Google Earth	Simple	Glacier forefield-connected	Geomorphological	Active	Extended	Mono-unit	0.0071776	0.0291514	5265.88	5221	356.339	-1.69496	-3.01487	R1	W	18.7077	29.3354	92.3998	0.000193723	0.000323425
RGU293360N0923948E	RGS293360N0923948E	20090216	Google Earth	Complex	Glacier forefield-connected	Geomorphological	Active	Extended	Mono-unit	0.00966604	0.0372179	5288	5243	340.564	-1.25899	-1.72636	R1	SE	17.7406	29.3403	92.3993	0.000260343	0.000433596
RGU293354N0923998E	RGS293354N0923998E	20090216	Google Earth	Complex	Talus-connected	Geomorphological	Transitional	Extended	Mono-unit	0.0127541	0.0528412	5345.89	5304	348.775	-1.1607	-2.2668	R1	S	20.6395	29.343	92.403	0.000319526	0.000660313
RGU293403N0923993E	RGS293403N0923993E	20090216	Google Earth	Complex	Glacier forefield-connected	Geomorphological	Active	Extended	Mono-unit	0.00589055	0.0174121	5317.32	5279	340.564	-1.0329	-1.72636	R1	S	17.5524	29.3414	92.3981	0.000123063	0.000174262
RGU293430N0924030E	RGS293430N0924030E	20090216	Google Earth	Complex	Glacier forefield-connected	Geomorphological	Relict	Extended	Mono-unit	0.0441903	1.08271	4399.96	4168	308.579	1.30056	1.12233	R1	NW	22.8363	29.3812	92.3868
RGU293414N0923981E	RGS293414N0923981E	20090216	Google Earth	Simple	Glacier forefield-connected	Geomorphological	Relict	Extended	Mono-unit	0.0158804	0.151796	4383.02	4285	310.125	1.79877	1.04138	R1	N	19.3593	29.3858	92.3973
RGU293812N0923868E	RGS293812N0923868E	20090216	Google Earth	Simple	Talus-connected	Geomorphological	Active	Extended	Mono-unit	0.0232805	0.210485	4944.43	4826	345.222	-0.0773753	-2.03986	R1	NW	17.9717	29.3687	92.3895	0.00145403	0.00346775
RGU293858N0923973E	RGS293858N0923973E	20090216	Google Earth	Complex	Talus-connected	Geomorphological	Active	Extended	Mono-unit	0.0224641	0.157129	5280.83	5201	353.573	-0.215481	-2.51678	R1	SE	18.4831	29.3664	92.4379	0.00105642	0.00244168
RGU293687N0923895E	RGS293687N0923895E	20090216	Google Earth	Complex	Debris-mantled slope-connected	Geomorphological	Active	Extended	Mono-unit	0.00952065	0.0376761	5270.34	5233	346.938	-0.33448	-2.20074	R1	N	25.4637	29.3609	92.3954	0.000186782	0.000440009
RGU293609N0923954E	RGS293609N0923954E	20090216	Google Earth	Simple	Debris-mantled slope-connected	Geomorphological	Active	Extended	Mono-unit	0.0143605	0.119374	5367.47	5278	360.865	-0.52769	-3.28819	R1	W	21.9286	29.3503	92.4085	0.000681322	0.0017558
RGU293503N0924085E	RGS293503N0924085E	20090216	Google Earth	Complex	Debris-mantled slope-connected	Geomorphological	Active	Extended	Mono-unit	0.0101003	0.0639643	5345.88	5311	349.407	-0.66876	-2.41927	R1	NW	18.5453	29.3509	92.3993	0.00042866	0.000830439
RGU293509N0923993E	RGS293509N0923993E	20090216	Google Earth	Simple	Talus-connected	Geomorphological	Active	Extended	Mono-unit	0.00563159	0.0196967	5020.43	4999	344.139	-0.0676921	-1.90297	R1	SW	22.4303	29.3671	92.3993	0.000110029	0.000202048
RGU293671N0923993E	RGS293671N0923993E	20090216	Google Earth	Complex	Debris-mantled slope-connected	Geomorphological	Transitional	Extended	Mono-unit	0.010439	0.0434924	5223.79	5181	350.596	-0.50857	-2.4427	R1	NE	11.0789	29.3611	92.4071	0.000482417	0.000522731
RGU293611N0924071E	RGS293611N0924071E	20090216	Google Earth	Simple	Glacier forefield-connected	Geomorphological	Relict	Extended	Mono-unit	0.0139894	0.0686864	4679.37	4550	338.664	1.2191	-1.39978	R1	N	23.4576	29.3787	92.3985
RGU293787N0923985E	RGS293787N0923985E	20090216	Google Earth	Simple	Glacier forefield-connected	Geomorphological	Relict	Extended	Mono-unit	0.00758696	0.0323406	4575.97	4514	329.944	1.2191	-0.442586	R1	N	24.1716	29.3811	92.3962
RGU293811N0923962E	RGS293811N0923962E	20090216	Google Earth	Simple	Glacier forefield-connected	Geomorphological	Active	Extended	Mono-unit	0.00847952	0.0476209	5293.19	5257	346.764	-0.977657	-2.08011	R1	SW	13.5749	29.3397	92.4275	0.000432445	0.000582826
RGU293397N0924275E	RGS293397N0924275E	20090216	Google Earth	Simple	Glacier forefield-connected	Geomorphological	Active	Extended	Mono-unit	0.00959772	0.0569119	5059.29	4995	353.352	-0.751279	-2.59398	R1	W	26.4957	29.3496	92.4286	0.000271905	0.000721816
RGU293496N0924286E	RGS293496N0924286E	20090216	Google Earth	Complex	Glacier forefield-connected	Geomorphological	Active	Extended	Mono-unit	0.00900338	0.047129	5306.91	5265	354.556	-0.77484	-2.64408	R1	NE	22.8759	29.349	92.436	0.000258409	0.00057561
RGU293490N0924360E	RGS293490N0924360E	20090216	Google Earth	Complex	Talus-connected	Geomorphological	Active	Extended	Mono-unit	0.0124758	0.0805971	5022.67	4933	345.654	-0.672	-1.92185	R1	W	26.8232	29.3547	92.4272	0.000380706	0.00109589
RGU293547N0924272E	RGS293547N0924272E	20090216	Google Earth	Simple	Talus-connected	Geomorphological	Active	Extended	Mono-unit	0.0111601	0.0573904	4925.83	4862	357.672	-0.18638	-2.96698	R1	W	21.6336	29.3604	92.4223	0.000331801	0.000729104
RGU293604N0924223E	RGS293604N0924223E	20090216	Google Earth	Complex	Talus-connected	Geomorphological	Active	Extended	Mono-unit	0.0112038	0.0644776	4857.78	4815	354.437	-0.371653	-2.69636	R1	W	20.1548	29.3628	92.4198	0.000398862	0.000838442
RGU293628N0924198E	RGS293628N0924198E	20090216	Google Earth	Simple	Talus-connected	Geomorphological	Active	Extended	Mono-unit	0.00358063	0.0101913	4804.92	4789	339.722	-0.45657	-1.49163	R1	W	15.143	29.3646	92.418	8.31543e-05	9.16345e-05
RGU293646N0924180E	RGS293646N0924180E	20090216	Google Earth	Simple	Talus-connected	Geomorphological	Active	Extended	Mono-unit	0.00573721	0.0261334	4810.39	4784	339.722	-0.45657	-1.49163	R1	SW	21.3153	29.366	92.4177	0.000153238	0.000283673
RGU293660N0924177E	RGS293660N0924177E	20090216	Google Earth	Complex	Talus-connected	Geomorphological	Active	Extended	Mono-unit	0.0154669	0.109894	5258.56	5132	360.549	-0.580576	-3.10221	R1	E	19.5686	29.3578	92.4424	0.000699338	0.00158982
RGU293694N0924161E	RGS293694N0924161E	20120109	Google Earth	Complex	Talus-connected	Geomorphological	Active	Extended	Mono-unit	0.0121659	0.0976084	4808.58	4763	339.804	-0.39755	-1.49163	R1	W	23.2762	29.3694	92.4161	0.000526484	0.00137901
RGU293639N0924295E	RGS293639N0924295E	20090216	Google Earth	Simple	Debris-mantled slope-connected	Geomorphological	Active	Extended	Mono-unit	0.00529282	0.019111	5367.91	5346	349.26	-0.18638	-2.18029	R1	W	21.6422	29.3639	92.4295	0.000110448	0.00019486
RGU293767N0924153E	RGS293767N0924153E	20090216	Google Earth	Simple	Talus-connected	Geomorphological	Active	Extended	Mono-unit	0.00560146	0.0237172	4763.53	4720	329.229	0.2484	-0.635725	R1	W	31.7327	29.3767	92.4153	9.61145e-05	0.000252498
RGU293633N0924165E	RGS293633N0924165E	20090216	Google Earth	Simple	Talus-connected	Geomorphological	Active	Extended	Mono-unit	0.00729138	0.031984	4845.03	4798	351.614	-0.45657	-2.56529	R1	NE	18.2281	29.3633	92.4165	0.000217942	0.000361494
RGU293645N0924159E	RGS293645N0924159E	20090216	Google Earth	Simple	Talus-connected	Geomorphological	Active	Extended	Mono-unit	0.00449354	0.0110713	4822.85	4790	339.722	-0.45657	-1.49163	R1	N	21.3355	29.3645	92.4159	6.48603e-05	0.00010121
RGU293654N0924150E	RGS293654N0924150E	20090216	Google Earth	Simple	Talus-connected	Geomorphological	Active	Extended	Mono-unit	0.0039814	0.0120914	4838	4812	340.9	-0.45657	-1.52101	R1	NE	26.2066	29.3654	92.415	5.836e-05	0.000112501
RGU293666N0924143E	RGS293666N0924143E	20090216	Google Earth	Simple	Talus-connected	Geomorphological	Active	Extended	Mono-unit	0.00573238	0.0215045	4823.12	4799	342.851	-0.441815	-1.72894	R1	NE	16.9173	29.3666	92.4143	0.000157517	0.000224501
RGU293678N0924130E	RGS293678N0924130E	20090216	Google Earth	Complex	Talus-connected	Geomorphological	Active	Extended	Mono-unit	0.00466079	0.0166579	4829.42	4805	344.139	-0.39755	-1.90297	R1	NE	23.384	29.3678	92.413	8.9459e-05	0.000165245
RGU293702N0924129E	RGS293702N0924129E	20090216	Google Earth	Complex	Talus-connected	Geomorphological	Active	Extended	Mono-unit	0.00712476	0.0315819	4802.26	4773	344.139	-0.39755	-1.90297	R1	NE	16.4124	29.3702	92.4129	0.000238243	0.000356049
RGU293529N0924223E	RGS293544N0924219E	20090216	Google Earth	Complex	Debris-mantled slope-connected	Geomorphological	Relict	Extended	Multi-unit	0.0151197	0.120178	5001.5	4909	344.489	-0.672	-1.96651	R1	NE	24.7483	29.3529	92.4223
RGU293560N0924211E	RGS293544N0924219E	20090216	Google Earth	Complex	Talus-connected	Geomorphological	Transitional	Extended	Multi-unit	0.0144025	0.0940922	4955.74	4898	356.241	-0.652831	-2.87358	R1	NE	16.9127	29.356	92.4211	0.000689389	0.00131961
RGU293505N0924187E	RGS293544N0924219E	20090216	Google Earth	Complex	Talus-connected	Geomorphological	Active	Extended	Multi-unit	0.0154967	0.10305	5142.18	5048	343.192	-0.798543	-1.81226	R1	NE	17.222	29.3505	92.4187	0.000741858	0.00147177
RGU293468N0924156E	RGS293544N0924219E	20090216	Google Earth	Complex	Talus-connected	Geomorphological	Active	Extended	Multi-unit	0.00918097	0.0612991	5325.01	5241	346.373	-1.404	-1.98394	R1	N	26.9946	29.3468	92.4156	0.000287849	0.000789092
RGU293498N0924235E	RGS293544N0924219E	20090216	Google Earth	Simple	Debris-mantled slope-connected	Geomorphological	Active	Extended	Multi-unit	0.00653913	0.0333211	5026.26	4993	343.192	-0.672	-1.81226	R1	NE	18.9415	29.3498	92.4235	0.000218798	0.000379705
RGU293608N0924354E	RGS293608N0924354E	20090216	Google Earth	Complex	Glacier forefield-connected	Geomorphological	Active	Extended	Mono-unit	0.012661	0.10182	5335.29	5295	351.525	-0.23037	-2.32142	R1	NE	13.3123	29.3608	92.4354	0.000942523	0.00145071
RGU293740N0924328E	RGS293740N0924328E	20090216	Google Earth	Simple	Debris-mantled slope-connected	Geomorphological	Active	Extended	Mono-unit	0.00633749	0.0239873	5377.26	5334	351.97	-0.18011	-2.3762	R1	E	25.286	29.374	92.4328	0.000119699	0.000255954
RGU293700N0924375E	RGS293700N0924375E	20090216	Google Earth	Complex	Debris-mantled slope-connected	Geomorphological	Active	Extended	Mono-unit	0.0093599	0.0491516	5269.36	5241	354.913	-0.18011	-2.63111	R1	NW	14.1185	29.37	92.4375	0.000429489	0.000605379
RGU293649N0924463E	RGS293649N0924463E	20090216	Google Earth	Simple	Talus-connected	Geomorphological	Active	Extended	Mono-unit	0.0294107	0.308239	5040.5	4899	347.809	-0.350501	-2.02294	R1	NE	18.8705	29.3649	92.4463	0.00203134	0.00548085
RGU293573N0924453E	RGS293573N0924453E	20090216	Google Earth	Simple	Glacier forefield-connected	Geomorphological	Active	Extended	Mono-unit	0.0083711	0.0512574	5215.89	5156	358.157	-0.735129	-2.78961	R2	N	25.2397	29.3573	92.4453	0.000256218	0.000636635
RGU293765N0924299E	RGS293765N0924299E	20090216	Google Earth	Complex	Debris-mantled slope-connected	Geomorphological	Active	Extended	Mono-unit	0.0067822	0.0270494	5317.94	5272	351.97	0.173529	-2.3762	R1	N	29.6164	29.3765	92.4299	0.000116665	0.000295646
RGU293801N0924236E	RGS293801N0924236E	20090216	Google Earth	Complex	Debris-mantled slope-connected	Geomorphological	Active	Extended	Mono-unit	0.0166794	0.0863912	4970.88	4833	327.98	0.11042	-0.36952	R1	N	20.4322	29.3801	92.4236	0.00052747	0.00119109
RGU293205N0924375E	RGS293205N0924375E	20090216	Google Earth	Simple	Talus-connected	Geomorphological	Active	Extended	Mono-unit	0.0091012	0.0486913	5041.87	5005	346.023	-0.48321	-1.99517	R1	SW	21.1113	29.3205	92.4375	0.000288143	0.000598583
RGU293289N0924347E	RGS293289N0924347E	20090216	Google Earth	Simple	Talus-connected	Geomorphological	Active	Extended	Mono-unit	0.00426439	0.0126729	5230.73	5205	338.812	-0.85342	-1.45574	R1	W	26.9836	29.3289	92.4347	5.9532e-05	0.000119024
RGU293126N0924388E	RGS293126N0924388E	20090216	Google Earth	Complex	Talus-connected	Geomorphological	Active	Extended	Mono-unit	0.0389425	0.415629	5020.2	4856	321.958	-0.771043	-0.146047	R1	W	15.6708	29.3126	92.4388	0.00327976	0.00784565
RGU293209N0924477E	RGS293209N0924477E	20090216	Google Earth	Complex	Talus-connected	Geomorphological	Active	Extended	Mono-unit	0.0153763	0.0717873	5183.06	5147	362.423	-1.06293	-3.25892	R2	NW	13.4271	29.3209	92.4477	0.000658939	0.000953762
RGU293218N0924493E	RGS293218N0924493E	20090216	Google Earth	Complex	Glacier forefield-connected	Geomorphological	Active	Extended	Mono-unit	0.00768427	0.0381512	5201.64	5177	362.423	-0.830056	-3.25892	R2	NW	14.9764	29.3218	92.4493	0.000314672	0.000446676
RGU293195N0924490E	RGS293195N0924490E	20090216	Google Earth	Simple	Talus-connected	Geomorphological	Active	Extended	Mono-unit	0.00401026	0.0128172	5230.12	5198	362.423	-1.164	-3.25892	R2	NW	28.6877	29.3195	92.449	5.6911e-05	0.000120652
RGU293334N0924431E	RGS293334N0924431E	20090216	Google Earth	Complex	Talus-connected	Geomorphological	Active	Extended	Mono-unit	0.0201454	0.13992	5293.86	5223	346.367	-1.1416	-2.00823	R1	SE	16.4791	29.3334	92.4431	0.00105136	0.00212442
RGU293356N0924327E	RGS293356N0924327E	20090216	Google Earth	Simple	Debris-mantled slope-connected	Geomorphological	Active	Extended	Mono-unit	0.00511121	0.0177323	5401.9	5358	338.812	-1.2771	-1.45574	R1	SW	29.4336	29.3356	92.4327	7.69121e-05	0.000178115
RGU292967N0924485E	RGS292967N0924485E	20200818	Google Earth	Simple	Debris-mantled slope-connected	Geomorphological	Active	Extended	Mono-unit	0.00927175	0.0526575	5236.07	5197	326.61	-0.70791	-0.470986	R2	NW	19.7986	29.2967	92.4485	0.000331361	0.000657558
RGU292972N0924442E	RGS292972N0924442E	20090216	Google Earth	Complex	Debris-mantled slope-connected	Geomorphological	Active	Extended	Mono-unit	0.0168208	0.112493	5119.68	4912	322.241	-0.707601	-0.17997	R1	NW	26.0786	29.2972	92.4442	0.00054543	0.00163505
RGU293122N0924479E	RGS293122N0924479E	20090216	Google Earth	Complex	Debris-mantled slope-connected	Geomorphological	Active	Extended	Mono-unit	0.0123283	0.0529875	5259.22	5195	336.539	-0.884615	-1.25093	R2	SW	23.48	29.3122	92.4479	0.000283465	0.000662507
RGU292787N0924444E	RGS292787N0924444E	20200818	Google Earth	Simple	Talus-connected	Geomorphological	Transitional	Extended	Mono-unit	0.0137789	0.0771618	4849.58	4687	310.579	0.34367	0.748475	R1	NW	28.262	29.2787	92.4444	0.00034734	0.00104008
RGU294268N0924427E	RGS294268N0924427E	20090216	Google Earth	Simple	Debris-mantled slope-connected	Geomorphological	Active	Extended	Mono-unit	0.0108058	0.0509596	5153.27	5060	341.717	1.1597	-1.18402	R1	SW	20.6328	29.4268	92.4427	0.000308244	0.000632199
RGU294329N0924448E	RGS294329N0924448E	20090216	Google Earth	Simple	Debris-mantled slope-connected	Geomorphological	Active	Extended	Mono-unit	0.00403951	0.0103216	5265.15	5237	351.899	0.33564	-1.98598	R2	SW	21.6045	29.4329	92.4448	5.97505e-05	9.30419e-05
RGU294069N0924237E	RGS294069N0924237E	20181114	Google Earth	Simple	Debris-mantled slope-connected	Geomorphological	Relict	Extended	Mono-unit	0.014478	0.132271	4462.33	4403	292.058	2.2136	2.98301	R1	W	16.6191	29.4069	92.4237
RGU294412N0924457E	RGS294412N0924457E	20181114	Google Earth	Complex	Debris-mantled slope-connected	Geomorphological	Relict	Extended	Mono-unit	0.00808673	0.0332776	5235.73	5220	350.24	0.053255	-1.86396	R2	N	13.2432	29.4412	92.4457
RGU294432N0924367E	RGS294432N0924367E	20181114	Google Earth	Complex	Debris-mantled slope-connected	Geomorphological	Relict	Extended	Mono-unit	0.0185616	0.113232	5079.51	5012	343.123	0.14303	-1.28181	R1	N	12.5988	29.4432	92.4367
RGU294537N0924339E	RGS294537N0924339E	20181114	Google Earth	Complex	Debris-mantled slope-connected	Geomorphological	Relict	Extended	Mono-unit	0.034068	0.346049	5020.77	4906	339.736	0.400609	-0.990833	R1	NW	11.6212	29.4537	92.4339
RGU294515N0924483E	RGS294515N0924483E	20181114	Google Earth	Complex	Debris-mantled slope-connected	Geomorphological	Transitional	Extended	Mono-unit	0.0181654	0.188036	5196.78	5108	355.288	-0.374306	-2.23488	R2	W	13.371	29.4515	92.4483	0.0017331	0.0030288
RGU294558N0924508E	RGS294558N0924508E	20181114	Google Earth	Complex	Debris-mantled slope-connected	Geomorphological	Transitional	Extended	Mono-unit	0.0100812	0.069541	5235.57	5199	348.926	-0.253482	-1.67057	R2	SW	13.2005	29.4558	92.4508	0.00064908	0.000918061
RGU293578N0924424E	RGS293578N0924424E	20100208	Google Earth	Simple	Talus-connected	Geomorphological	Active	Extended	Mono-unit	0.00876469	0.0520655	5313.45	5267	375.359	-0.961566	-1.63328	R2	N	18.8925	29.7504	92.6032	0.000342734	0.000648698
RGU293664N0924379E	RGS293664N0924379E	20100208	Google Earth	Complex	Glacier forefield-connected	Geomorphological	Relict	Extended	Mono-unit	0.0174264	0.173004	5150.24	5056	390.002	-0.403816	-2.84595	R2	NE	12.8833	29.7631	92.6071
RGU297504N0926032E	RGS297504N0926032E	20100208	Google Earth	Complex	Glacier forefield-connected	Geomorphological	Transitional	Extended	Mono-unit	0.0171625	0.137142	5233.69	5140	389.962	-0.81473	-2.96654	R2	W	18.1308	29.734	92.6144	0.000939344	0.00207389
RGU297631N0926071E	RGS297631N0926071E	20100208	Google Earth	Complex	Talus-connected	Geomorphological	Active	Extended	Mono-unit	0.0261753	0.258432	5211.71	5121	388.585	-0.713167	-2.90049	R2	N	17.7092	29.7326	92.6098	0.00181086	0.00443608
RGU297340N0926144E	RGS297340N0926144E	20100208	Google Earth	Complex	Talus-connected	Geomorphological	Active	Extended	Mono-unit	0.0193835	0.144029	5254.9	5160	384.039	-0.782438	-2.53241	R2	NE	16.5577	29.7306	92.6036	0.00107723	0.00219949
RGU297326N0926098E	RGS297326N0926098E	20100208	Google Earth	Complex	Talus-connected	Geomorphological	Active	Extended	Mono-unit	0.0223681	0.137166	5029.67	4960	378.385	-0.853045	-1.97276	R2	N	19.3768	29.7371	92.5998	0.000881202	0.00207434
RGU297306N0926036E	RGS297306N0926036E	20100208	Google Earth	Complex	Talus-connected	Geomorphological	Transitional	Extended	Mono-unit	0.0278683	0.182221	4915.42	4781	379.822	-1.15866	-2.28423	R2	NW	14.8486	29.7162	92.6049	0.0015156	0.00291676
RGU297371N0925998E	RGS297371N0925998E	20100208	Google Earth	Simple	Glacier forefield-connected	Geomorphological	Active	Extended	Mono-unit	0.0225795	0.185402	5145.84	4963	389.155	-1.24479	-3.03871	R2	NW	23.1837	29.715	92.6087	0.0010038	0.00297796
RGU297162N0926049E	RGS297162N0926049E	20100208	Google Earth	Complex	Glacier forefield-connected	Geomorphological	Active	Extended	Mono-unit	0.0354185	0.342129	5156.21	4999	388.578	-1.3731	-2.98811	R2	W	13.3774	29.7159	92.6125	0.00315189	0.00621171
RGU297150N0926087E	RGS297150N0926087E	20100208	Google Earth	Simple	Glacier forefield-connected	Geomorphological	Active	Extended	Mono-unit	0.00954889	0.0616092	5120.77	5076	390.203	-1.5615	-3.11889	R2	N	14.3974	29.7154	92.617	0.000528128	0.000793884
RGU297159N0926125E	RGS297159N0926125E	20100208	Google Earth	Complex	Talus-connected	Geomorphological	Relict	Extended	Mono-unit	0.0104512	0.0577719	5363.7	5329	388.174	-0.48805	-3.02246	R2	NE	18.9741	29.6914	92.6221
RGU297154N0926170E	RGS297154N0926170E	20100208	Google Earth	Simple	Talus-connected	Geomorphological	Active	Extended	Mono-unit	0.010564	0.0532107	5191.39	5149	386.754	-0.77904	-2.8735	R2	N	19.516	29.6976	92.6192	0.000339499	0.000665857
RGU296914N0926221E	RGS296914N0926221E	20100208	Google Earth	Complex	Talus-connected	Geomorphological	Active	Extended	Mono-unit	0.0175172	0.167921	5121.26	5055	374.912	-0.543023	-1.85277	R2	W	10.182	29.6993	92.6154	0.00202468	0.00264428
RGU296976N0926192E	RGS296976N0926192E	20100208	Google Earth	Complex	Talus-connected	Geomorphological	Transitional	Extended	Mono-unit	0.012708	0.0611626	4938.85	4887	356.574	-0.22145	-0.165475	R2	W	15.1325	29.6944	92.6058	0.000499383	0.000786984
RGU296993N0926154E	RGS296993N0926154E	20100208	Google Earth	Simple	Talus-connected	Geomorphological	Relict	Extended	Mono-unit	0.0124612	0.0683226	4725.64	4641	367.094	0.088793	-1.14523	R2	NW	23.5176	29.6817	92.6002
RGU296944N0926058E	RGS296944N0926058E	20100208	Google Earth	Complex	Debris-mantled slope-connected	Geomorphological	Transitional	Extended	Mono-unit	0.00724718	0.0255786	5341.72	5312	387.958	0.13437	-3.18883	R2	NW	14.7317	29.6652	92.6167	0.000214397	0.000276462
RGU296817N0926002E	RGS296817N0926002E	20100208	Google Earth	Complex	Debris-mantled slope-connected	Geomorphological	Active	Extended	Mono-unit	0.0162641	0.126043	5266.52	5190	387.958	0.0908514	-3.18883	R2	N	14.2494	29.6694	92.6127	0.00109146	0.00187416
RGU296652N0926167E	RGS296652N0926167E	20100208	Google Earth	Simple	Debris-mantled slope-connected	Geomorphological	Relict	Extended	Mono-unit	0.00461246	0.014718	5147.94	5125	361.06	-0.11674	-0.740692	R2	SW	16.2827	29.6616	92.607
RGU296694N0926127E	RGS296694N0926127E	20100208	Google Earth	Complex	Talus-connected	Geomorphological	Transitional	Extended	Mono-unit	0.0131885	0.0612832	5135.73	5053	388.502	-0.851299	-2.4341	R2	NE	24.8515	29.7785	92.6344	0.000310807	0.000788846
RGU296616N0926070E	RGS296616N0926070E	20100208	Google Earth	Complex	Talus-connected	Geomorphological	Transitional	Extended	Mono-unit	0.0107666	0.0489976	5176.97	5117	388.502	-0.456526	-2.4341	R2	NE	24.8226	29.7726	92.6368	0.00024877	0.000603104
RGU297785N0926344E	RGS297785N0926344E	20100208	Google Earth	Complex	Talus-connected	Geomorphological	Relict	Extended	Mono-unit	0.0177344	0.157254	5295.54	5244	396.119	-0.00722994	-3.05379	R2	NE	12.3534	29.7828	92.651
RGU297726N0926368E	RGS297726N0926368E	20100208	Google Earth	Simple	Debris-mantled slope-connected	Geomorphological	Relict	Extended	Mono-unit	0.0117473	0.0690054	4886.29	4749	379.135	0.6368	-1.24881	R2	NW	24.7669	29.796	92.6586
RGU297828N0926510E	RGS297828N0926510E	20100208	Google Earth	Complex	Talus-connected	Geomorphological	Relict	Extended	Mono-unit	0.0145092	0.115399	5312.23	5236	396.604	-0.617929	-3.07472	R2	NE	16.0709	29.7736	92.6536
RGU297960N0926586E	RGS297960N0926586E	20100208	Google Earth	Complex	Talus-connected	Geomorphological	Relict	Extended	Mono-unit	0.0123666	0.0612257	5224.95	5208	395.741	-0.101036	-2.96355	R2	N	12.3852	29.7769	92.6551
RGU297736N0926536E	RGS297736N0926536E	20100208	Google Earth	Simple	Talus-connected	Geomorphological	Transitional	Extended	Mono-unit	0.0310486	0.264575	5049.94	4786	376.78	0.0252957	-0.987299	R2	NE	16.753	29.7875	92.6651	0.00195642	0.0045629
RGU297769N0926551E	RGS297769N0926551E	20100208	Google Earth	Simple	Debris-mantled slope-connected	Geomorphological	Transitional	Extended	Mono-unit	0.00821908	0.0332933	5230.18	5169	402.258	-0.25889	-3.60132	R2	W	19.6519	29.7868	92.6417	0.000211008	0.000379324
RGU297875N0926651E	RGS297875N0926651E	20100208	Google Earth	Complex	Glacier forefield-connected	Geomorphological	Relict	Extended	Mono-unit	0.0181879	0.199	5263.12	5200	397.054	-0.481447	-3.2276	R2	N	11.2198	29.7688	92.6392
RGU297868N0926417E	RGS297868N0926417E	20100208	Google Earth	Complex	Talus-connected	Geomorphological	Active	Extended	Mono-unit	0.0139683	0.0551979	5284.05	5248	396.322	-0.23829	-3.23371	R2	NE	16.8935	29.7496	92.6514	0.000404867	0.000695808
RGU297688N0926392E	RGS297471N0926263E	20100208	Google Earth	Complex	Talus-connected	Geomorphological	Active	Extended	Multi-unit	0.0270099	0.177294	5300.45	5222	397.894	-1.00757	-3.54337	R2	NE	14.4974	29.7467	92.6283	0.00150955	0.00282238
RGU297496N0926514E	RGS297471N0926263E	20100208	Google Earth	Simple	Talus-connected	Geomorphological	Active	Extended	Multi-unit	0.00489373	0.0157161	5372.89	5351	400.555	-0.926462	-3.83242	R2	NE	16.1319	29.7463	92.6237	0.000120562	0.000154098
RGU297463N0926237E	RGS297471N0926263E	20100208	Google Earth	Simple	Talus-connected	Geomorphological	Active	Extended	Multi-unit	0.00725823	0.0278271	5400.75	5377	400.555	-0.92607	-3.83242	R2	NE	15.2945	29.7465	92.6222	0.000224855	0.000305875
RGU297465N0926222E	RGS297465N0926222E	20100208	Google Earth	Complex	Talus-connected	Geomorphological	Active	Extended	Mono-unit	0.0175741	0.0880255	5327.29	5265	383.43	-1.1563	-2.22215	R2	E	14.1108	29.741	92.6328	0.000769582	0.00121818
RGU297467N0926283E	RGS297467N0926283E	20100208	Google Earth	Simple	Glacier forefield-connected	Geomorphological	Active	Extended	Mono-unit	0.0120611	0.0979503	5177.84	5108	388.959	-0.802038	-2.73856	R2	E	30.6164	29.7309	92.6411	0.000409938	0.00138481
RGU297410N0926328E	RGS297410N0926328E	20100208	Google Earth	Complex	Debris-mantled slope-connected	Geomorphological	Active	Extended	Mono-unit	0.00506163	0.0186712	5378.73	5334	385.662	-0.852469	-2.68135	R2	W	23.2233	29.7004	92.6353	0.000100926	0.000189492
RGU297309N0926411E	RGS297309N0926411E	20100208	Google Earth	Complex	Debris-mantled slope-connected	Geomorphological	Active	Extended	Mono-unit	0.0182389	0.13391	5357.74	5328	382.913	-0.8816	-2.44164	R2	SW	15.1895	29.6963	92.6314	0.00108935	0.00201539
RGU297004N0926353E	RGS297004N0926353E	20100208	Google Earth	Simple	Debris-mantled slope-connected	Geomorphological	Active	Extended	Mono-unit	0.0123492	0.0990989	5350.38	5304	388.174	-0.534995	-3.02246	R2	NE	16.4321	29.6921	92.6258	0.000746696	0.00140432
RGU296963N0926314E	RGS296963N0926314E	20100310	Google Earth	Complex	Talus-connected	Geomorphological	Transitional	Extended	Mono-unit	0.0073933	0.0352942	4813.38	4784	350.99	-0.152028	-0.030914	R2	S	22.7378	29.6133	92.6251	0.000194632	0.000406843
RGU296921N0926258E	RGS296921N0926258E	20100310	Google Earth	Complex	Talus-connected	Geomorphological	Transitional	Extended	Mono-unit	0.0105168	0.065452	4855.76	4786	350.99	-0.416035	-0.030914	R2	W	26.1035	29.6113	92.6261	0.000317067	0.00085367
RGU296133N0926251E	RGS296133N0926251E	20100310	Google Earth	Complex	Glacier forefield-connected	Geomorphological	Transitional	Extended	Mono-unit	0.017004	0.188974	5248.99	5171	380.761	-0.54211	-2.63735	R2	N	15.5323	29.6175	92.6427	0.00150417	0.00304696
RGU296113N0926261E	RGS296113N0926261E	20100310	Google Earth	Complex	Talus-connected	Geomorphological	Transitional	Extended	Mono-unit	0.0087668	0.0388788	5063.13	5022	377.548	-0.4639	-2.32322	R2	W	17.3516	29.6337	92.6392	0.000277863	0.000456918
RGU296175N0926427E	RGS296175N0926427E	20100310	Google Earth	Complex	Talus-connected	Geomorphological	Transitional	Extended	Mono-unit	0.0138849	0.10157	5127.81	5072	381.925	-0.591224	-2.66865	R2	W	19.1398	29.6271	92.6409	0.00066029	0.00144645
RGU296337N0926392E	RGS296337N0926392E	20100310	Google Earth	Complex	Talus-connected	Geomorphological	Transitional	Extended	Mono-unit	0.0104925	0.0815269	5041.58	4996	369.023	-0.25546	-1.42523	R2	SW	19.5983	29.6307	92.6555	0.000518063	0.00111108
RGU296271N0926409E	RGS296271N0926409E	20100310	Google Earth	Simple	Talus-connected	Geomorphological	Transitional	Extended	Mono-unit	0.00744521	0.0401535	5122.65	5073	376.624	-0.7702	-2.1123	R2	W	23.3679	29.6191	92.6644	0.000215779	0.000474953
RGU296307N0926555E	RGS296307N0926555E	20100310	Google Earth	Complex	Talus-connected	Geomorphological	Relict	Extended	Mono-unit	0.0104671	0.0693679	5080.12	5043	381.621	-0.41913	-2.50384	R2	SW	18.0977	29.6239	92.6604
RGU296191N0926644E	RGS296191N0926644E	20100310	Google Earth	Complex	Talus-connected	Geomorphological	Active	Extended	Mono-unit	0.0166902	0.138827	5166.06	5111	387.431	-1.18466	-3.11582	R2	N	16.5014	29.6129	92.6671	0.00104177	0.00210452
RGU296129N0926671E	RGS296129N0926671E	20100208	Google Earth	Simple	Debris-mantled slope-connected	Geomorphological	Active	Extended	Mono-unit	0.00559002	0.0212834	5240.2	5221	381.907	-1.5527	-2.36318	R2	N	18.2592	29.6665	92.6515	0.000144789	0.000221734
RGU296653N0926533E	RGS296653N0926533E	20100208	Google Earth	Complex	Talus-connected	Geomorphological	Active	Extended	Mono-unit	0.0183363	0.139011	5165.51	5106	381.49	-1.53112	-2.3796	R2	NE	21.0052	29.6717	92.6489	0.000826595	0.00210786
RGU296665N0926515E	RGS296665N0926515E	20100208	Google Earth	Complex	Glacier forefield-connected	Geomorphological	Active	Extended	Mono-unit	0.0305606	0.167283	5300.06	5160	382.644	-1.01419	-2.45122	R2	SW	15.7582	29.6998	92.6256	0.0013129	0.00263223
RGU296717N0926489E	RGS296717N0926489E	20100208	Google Earth	Complex	Debris-mantled slope-connected	Geomorphological	Transitional	Extended	Mono-unit	0.0173369	0.077352	5361.72	5309	391.021	-1.20133	-3.03247	R2	W	20.9774	29.6999	92.6511	0.000460537	0.00104315
RGU296998N0926256E	RGS296998N0926256E	20100208	Google Earth	Complex	Debris-mantled slope-connected	Geomorphological	Transitional	Extended	Mono-unit	0.00739403	0.0399806	5330.09	5293	384.163	-1.1978	-2.45109	R2	NW	20.9385	29.694	92.6496	0.000238458	0.0004725
RGU296999N0926511E	RGS296999N0926511E	20091021	Google Earth	Complex	Talus-connected	Geomorphological	Transitional	Extended	Mono-unit	0.00796251	0.0357187	5125.63	5100	399.016	-1.0405	-2.81858	R2	NE	20.1686	29.7892	92.702	0.000220813	0.000412722
RGU296940N0926496E	RGS296940N0926496E	20091021	Google Earth	Complex	Talus-connected	Geomorphological	Transitional	Extended	Mono-unit	0.0157381	0.092499	5180.91	5129	407.309	-0.951887	-3.66353	R2	N	12.7456	29.7877	92.7038	0.000893644	0.00129285
RGU297892N0927020E	RGS297892N0927020E	20091021	Google Earth	Simple	Glacier forefield-connected	Geomorphological	Transitional	Extended	Mono-unit	0.0166503	0.13729	5187.89	5098	405.372	0.455646	-3.35538	R2	N	14.9684	29.8133	92.7106	0.00113296	0.00207658
RGU297877N0927038E	RGS297877N0927038E	20091021	Google Earth	Simple	Talus-connected	Geomorphological	Active	Extended	Mono-unit	0.00583796	0.0241368	5092	5051	403.648	0.5761	-3.24989	R2	NE	27.6371	29.8149	92.7115	0.000110907	0.000257868
RGU298133N0927106E	RGS298133N0927106E	20091021	Google Earth	Simple	Talus-connected	Geomorphological	Active	Extended	Mono-unit	0.0058886	0.0247177	5075	5045	400.487	0.5761	-2.88626	R2	W	25.7769	29.8168	92.7117	0.000121151	0.000265334
RGU298149N0927115E	RGS298149N0927115E	20091021	Google Earth	Simple	Talus-connected	Geomorphological	Relict	Extended	Mono-unit	0.0103717	0.0618767	4896.84	4808	376.518	0.78226	-0.259904	R2	N	24.0152	29.8317	92.7036
RGU298168N0927117E	RGS298168N0927117E	20091021	Google Earth	Simple	Talus-connected	Geomorphological	Relict	Extended	Mono-unit	0.00891843	0.0440217	5088.62	4982	395.936	0.487959	-2.46764	R2	NE	27.6211	29.8285	92.7016
RGU298317N0927036E	RGS298317N0927036E	20091021	Google Earth	Simple	Talus-connected	Geomorphological	Transitional	Extended	Mono-unit	0.00810208	0.0409185	5281.2	5235	399.175	-0.65764	-2.77109	R2	E	15.7786	29.795	92.7209	0.00032074	0.000485832
RGU298285N0927016E	RGS298285N0927016E	20091021	Google Earth	Complex	Glacier forefield-connected	Geomorphological	Transitional	Extended	Mono-unit	0.0107512	0.0820394	5349.4	5298	399.793	-0.526748	-2.92562	R2	NE	15.0645	29.7759	92.7188	0.000672792	0.00111946
RGU297950N0927209E	RGS297950N0927209E	20100310	Google Earth	Complex	Talus-connected	Geomorphological	Relict	Extended	Mono-unit	0.0116289	0.0644882	5208.69	5155	386.231	-1.3463	-3.00902	R2	N	14.7825	29.6101	92.6697
RGU297759N0927188E	RGS296123N0926809E	20100310	Google Earth	Complex	Talus-connected	Geomorphological	Transitional	Extended	Multi-unit	0.00992366	0.0339876	5425.15	5380	385.174	-1.6993	-2.84453	R2	SW	15.7447	29.614	92.6807	0.000266971	0.000388836
RGU296101N0926697E	RGS296123N0926809E	20100310	Google Earth	Complex	Talus-connected	Geomorphological	Active	Extended	Multi-unit	0.00774113	0.0299337	5417.42	5398	385.174	-1.6993	-2.84453	R2	SW	15.2075	29.6127	92.6811	0.000243227	0.000333868
RGU296140N0926807E	RGS296140N0926807E	20100310	Google Earth	Complex	Glacier forefield-connected	Geomorphological	Relict	Extended	Mono-unit	0.0159923	0.191743	5213.51	5146	382.447	-1.38505	-2.38792	R2	N	13.72	29.6292	92.6877
RGU296127N0926811E	RGS296127N0926811E	20100310	Google Earth	Simple	Glacier forefield-connected	Geomorphological	Relict	Extended	Mono-unit	0.00997095	0.0280557	5235.91	5187	378.641	-1.75194	-2.09301	R2	NW	13.3238	29.6391	92.6894
RGU296292N0926877E	RGS296292N0926877E	20100310	Google Earth	Complex	Talus-connected	Geomorphological	Active	Extended	Mono-unit	0.00963751	0.0323973	5283.8	5264	387.973	-1.76538	-2.83868	R2	NW	19.0902	29.639	92.698	0.000211136	0.000367107
RGU296390N0926980E	RGS296390N0926980E	20100310	Google Earth	Complex	Glacier forefield-connected	Geomorphological	Active	Extended	Mono-unit	0.00608374	0.0170282	5265.21	5253	387.973	-1.8406	-2.83868	R2	N	20.2981	29.6388	92.6955	0.000104625	0.000169662
RGU296388N0926955E	RGS296388N0926955E	20100310	Google Earth	Complex	Glacier forefield-connected	Geomorphological	Relict	Extended	Mono-unit	0.0127494	0.0917357	5167.17	5091	375.77	-1.66409	-1.81339	R2	SW	18.2701	29.6364	92.6859
RGU296364N0926859E	RGS296364N0926859E	20100208	Google Earth	Complex	Talus-connected	Geomorphological	Transitional	Extended	Mono-unit	0.0221599	0.131127	5360.61	5287	389.735	-1.8306	-2.97949	R2	SW	20.9359	29.6583	92.6826	0.000782178	0.00196522
RGU296391N0926894E	RGS296391N0926894E	20100208	Google Earth	Complex	Glacier forefield-connected	Geomorphological	Transitional	Extended	Mono-unit	0.0464413	0.593765	5265.51	5059	390.44	-1.92303	-3.11475	R2	W	11.6416	29.6483	92.6802	0.00627181	0.0120371
RGU296583N0926826E	RGS296583N0926826E	20100208	Google Earth	Complex	Talus-connected	Geomorphological	Active	Extended	Mono-unit	0.0312043	0.205435	5260.51	5180	390.833	-0.738871	-3.03425	R2	N	18.0143	29.6787	92.6694	0.0014159	0.00336814
RGU296483N0926802E	RGS296483N0926802E	20100208	Google Earth	Simple	Debris-mantled slope-connected	Geomorphological	Active	Extended	Mono-unit	0.0180389	0.14175	5352.63	5257	391.908	-1.37915	-3.12311	R2	NE	20.3792	29.6764	92.6769	0.000867621	0.00215779
RGU296787N0926694E	RGS296787N0926694E	20100208	Google Earth	Complex	Debris-mantled slope-connected	Geomorphological	Active	Extended	Mono-unit	0.0264453	0.314774	5283.03	5171	389.201	-1.17915	-2.77572	R2	NE	15.7302	29.7017	92.6763	0.00247476	0.00562058
RGU296764N0926769E	RGS296764N0926769E	20100208	Google Earth	Complex	Talus-connected	Geomorphological	Active	Extended	Mono-unit	0.0299707	0.211741	5261.48	5124	380.641	-0.517451	-1.76714	R2	N	13.1629	29.7344	92.6725	0.00198188	0.0034926
RGU297017N0926763E	RGS297017N0926763E	20100208	Google Earth	Complex	Glacier forefield-connected	Geomorphological	Transitional	Extended	Mono-unit	0.014258	0.112317	5155.73	5087	392.738	-0.836094	-2.76758	R2	N	14.7998	29.7214	92.6978	0.000937192	0.00163199
RGU297344N0926725E	RGS297344N0926725E	20100208	Google Earth	Complex	Debris-mantled slope-connected	Geomorphological	Active	Extended	Mono-unit	0.00808507	0.0294193	5389.68	5357	386.809	-1.2084	-2.3291	R2	E	15.0873	29.6761	92.7141	0.000240907	0.000326995
RGU297214N0926978E	RGS297214N0926978E	20100208	Google Earth	Simple	Glacier forefield-connected	Geomorphological	Active	Extended	Mono-unit	0.00944861	0.0540898	5256.21	5192	388.888	-0.69095	-2.5884	R2	NE	19.6951	29.672	92.7207	0.000342092	0.00067908
RGU296761N0927141E	RGS296761N0927141E	20091021	Google Earth	Simple	Talus-connected	Geomorphological	Active	Extended	Mono-unit	0.0195832	0.136869	5195.6	5004	390.286	-0.775407	-1.84255	R2	E	20.8676	29.7925	92.7281	0.000818981	0.00206894
RGU296720N0927207E	RGS296720N0927207E	20091021	Google Earth	Complex	Talus-connected	Geomorphological	Active	Extended	Mono-unit	0.0132073	0.072996	5068.62	5011	393.866	-0.649394	-2.34757	R2	NW	19.7746	29.7799	92.7275	0.000459881	0.000973063
RGU297925N0927281E	RGS297925N0927281E	20091021	Google Earth	Complex	Glacier forefield-connected	Geomorphological	Transitional	Extended	Mono-unit	0.0189373	0.188057	5171.88	5109	398.302	-0.792115	-2.82921	R2	NE	10.6086	29.7768	92.7264	0.00217728	0.00302922
RGU297799N0927275E	RGS297799N0927275E	20100310	Google Earth	Complex	Glacier forefield-connected	Geomorphological	Relict	Extended	Mono-unit	0.0082981	0.0308731	5196.5	5163	390.826	-1.00617	-3.07946	R2	NE	13.4373	29.6101	92.7291
RGU297768N0927264E	RGS297768N0927264E	20100310	Google Earth	Complex	Talus-connected	Geomorphological	Active	Extended	Mono-unit	0.0085058	0.037348	5295.78	5259	380.801	-1.04309	-2.05818	R2	NE	14.0246	29.62	92.7267	0.000328489	0.000435415
RGU296101N0927291E	RGS296101N0927291E	20100310	Google Earth	Complex	Talus-connected	Geomorphological	Relict	Extended	Mono-unit	0.0238696	0.102793	5129.04	5067	393.941	-0.861139	-3.18037	R2	NW	16.8327	29.6199	92.7361
RGU296200N0927267E	RGS296200N0927267E	20100310	Google Earth	Complex	Talus-connected	Geomorphological	Transitional	Extended	Mono-unit	0.0252848	0.162609	5171.69	5111	394.392	-1.00645	-3.29497	R2	N	12.6603	29.6164	92.7326	0.00158139	0.00254423
RGU296199N0927361E	RGS296199N0927361E	20100310	Google Earth	Complex	Talus-connected	Geomorphological	Transitional	Extended	Mono-unit	0.0126617	0.0635939	5082.56	5044	395.094	-0.27919	-3.27325	R2	N	14.5184	29.6248	92.7424	0.000540695	0.000824671
RGU296164N0927326E	RGS296164N0927326E	20100310	Google Earth	Complex	Talus-connected	Geomorphological	Transitional	Extended	Mono-unit	0.0132531	0.103285	5194.22	5165	390.826	-0.99112	-3.07946	R2	W	13.9407	29.613	92.7312	0.000913784	0.00147579
RGU296248N0927424E	RGS296248N0927424E	20100310	Google Earth	Complex	Glacier forefield-connected	Geomorphological	Active	Extended	Mono-unit	0.038268	0.431366	5225.69	5025	388.255	-0.210043	-2.61011	R2	N	14.8304	29.6199	92.7567	0.00359213	0.00820348
RGU296130N0927312E	RGS296130N0927312E	20100310	Google Earth	Complex	Talus-connected	Geomorphological	Active	Extended	Mono-unit	0.017141	0.124516	5058.86	5004	386.881	-0.14058	-2.45937	R2	N	17.0158	29.6127	92.7631	0.000906933	0.00184694
RGU296199N0927567E	RGS296199N0927567E	20100310	Google Earth	Complex	Glacier forefield-connected	Geomorphological	Active	Extended	Mono-unit	0.0163256	0.119015	5210.78	5150	379.968	-0.189983	-1.83165	R2	NE	13.8659	29.6355	92.7433	0.00105852	0.00174947
RGU296127N0927631E	RGS296127N0927631E	20100310	Google Earth	Complex	Talus-connected	Geomorphological	Active	Extended	Mono-unit	0.0177186	0.11692	5303.88	5237	392.02	-0.666954	-2.7158	R2	E	16.8014	29.639	92.765	0.000862158	0.00171258
RGU296355N0927433E	RGS296355N0927433E	20100310	Google Earth	Complex	Glacier forefield-connected	Geomorphological	Active	Extended	Mono-unit	0.0187787	0.216259	5304.47	5215	399.556	-0.783962	-3.3308	R2	NW	17.9148	29.6512	92.7683	0.00149851	0.00358221
RGU296390N0927650E	RGS296390N0927650E	20100310	Google Earth	Simple	Debris-mantled slope-connected	Geomorphological	Active	Extended	Mono-unit	0.00413854	0.0107328	5361.6	5327	399.556	-0.896	-3.3308	R2	N	31.0721	29.6484	92.7675	4.43241e-05	9.75072e-05
RGU296512N0927683E	RGS296512N0927683E	20100310	Google Earth	Complex	Debris-mantled slope-connected	Geomorphological	Active	Extended	Mono-unit	0.0147285	0.112353	5307.82	5202	390.967	-0.737496	-2.56738	R2	N	21.4089	29.6477	92.7638	0.000656057	0.00163261
RGU296484N0927675E	RGS296484N0927675E	20100310	Google Earth	Simple	Glacier forefield-connected	Geomorphological	Active	Extended	Mono-unit	0.00729854	0.0258441	5279.44	5254	393.092	-1.42907	-2.84113	R2	NE	11.8381	29.6661	92.7516	0.000268518	0.000279908
RGU296477N0927638E	RGS296477N0927638E	20100310	Google Earth	Complex	Debris-mantled slope-connected	Geomorphological	Active	Extended	Mono-unit	0.0115548	0.0333358	5273.55	5246	393.092	-1.42506	-2.84113	R2	NW	12.5698	29.6662	92.7526	0.00032649	0.000379905
RGU296661N0927516E	RGS296661N0927516E	20100310	Google Earth	Simple	Glacier forefield-connected	Geomorphological	Active	Extended	Mono-unit	0.00545628	0.0232796	5243.27	5221	393.092	-1.73777	-2.84113	R2	N	17.5524	29.6654	92.7474	0.000164532	0.000246918
RGU296662N0927526E	RGS296662N0927526E	20100310	Google Earth	Complex	Glacier forefield-connected	Geomorphological	Active	Extended	Mono-unit	0.02651	0.357455	5337.63	5255	399.106	-1.5441	-3.30926	R2	W	14.621	29.668	92.7568	0.00301833	0.00654709
RGU296654N0927474E	RGS297438N0927336E	20100208	Google Earth	Complex	Glacier forefield-connected	Geomorphological	Active	Extended	Multi-unit	0.0144362	0.143718	5352.14	5319	391.748	-1.1837	-2.26775	R2	N	10.6272	29.7429	92.7356	0.00166105	0.0021938
RGU296680N0927568E	RGS297438N0927336E	20100208	Google Earth	Complex	Debris-mantled slope-connected	Geomorphological	Active	Extended	Multi-unit	0.019671	0.118885	5349.7	5304	389.608	-1.12675	-2.06271	R2	N	12.7942	29.744	92.7322	0.00114427	0.00174717
RGU297429N0927356E	RGS297438N0927336E	20100208	Google Earth	Complex	Debris-mantled slope-connected	Geomorphological	Active	Extended	Multi-unit	0.0100821	0.0547897	5305.49	5246	406.549	-1.1837	-3.64941	R2	N	19.1933	29.7454	92.737	0.000355223	0.000689638
RGU297440N0927322E	RGS297440N0927322E	20100208	Google Earth	Complex	Glacier forefield-connected	Geomorphological	Active	Extended	Mono-unit	0.0225585	0.141472	5223.54	5100	391.073	-1.66147	-2.13197	R2	NE	18.7416	29.7394	92.7505	0.000938504	0.00215273
RGU297454N0927370E	RGS297454N0927370E	20091021	Google Earth	Simple	Talus-connected	Geomorphological	Relict	Extended	Mono-unit	0.0107587	0.0787934	5191.65	5121	412.149	-0.92246	-3.44953	R2	N	18.4922	29.8495	92.7506
RGU298495N0927506E	RGS298495N0927506E	20091021	Google Earth	Simple	Talus-connected	Geomorphological	Relict	Extended	Mono-unit	0.00832098	0.0408936	5304.02	5248	412.149	-0.930513	-3.44953	R2	NE	15.996	29.8469	92.7476
RGU297394N0927505E	RGS297394N0927505E	20091021	Google Earth	Complex	Talus-connected	Geomorphological	Relict	Extended	Mono-unit	0.0112804	0.0535454	5224.59	5164	414.178	-0.92246	-3.57536	R2	NW	21.4411	29.8489	92.7545
RGU298469N0927476E	RGS298469N0927476E	20091021	Google Earth	Simple	Talus-connected	Geomorphological	Transitional	Extended	Mono-unit	0.0101098	0.0588706	5277.12	5248	383.721	-1.109	-0.742708	R2	W	14.247	29.8237	92.7583	0.000509868	0.000751727
RGU298489N0927545E	RGS298489N0927545E	20091021	Google Earth	Complex	Talus-connected	Geomorphological	Transitional	Extended	Mono-unit	0.0272295	0.333328	5181.49	5070	398.733	-1.34957	-2.18541	R2	N	14.4053	29.828	92.7638	0.00285583	0.00602045
RGU298237N0927583E	RGS298237N0927583E	20091021	Google Earth	Simple	Talus-connected	Geomorphological	Active	Extended	Mono-unit	0.00922883	0.0549534	5310.69	5264	408.148	-1.1442	-2.9322	R2	NE	17.1883	29.8411	92.7658	0.000396365	0.000692112
RGU298280N0927638E	RGS298280N0927638E	20091021	Google Earth	Simple	Glacier forefield-connected	Geomorphological	Relict	Extended	Mono-unit	0.0177451	0.173067	5267.82	5223	397.001	-0.886606	-2.33686	R2	N	15.7795	29.7957	92.7506
RGU298411N0927658E	RGS298411N0927658E	20091021	Google Earth	Complex	Talus-connected	Geomorphological	Active	Extended	Mono-unit	0.0263386	0.231089	5253.33	5170	397.44	-1.05025	-2.79651	R2	NE	12.3509	29.7578	92.7312	0.00230275	0.00387898
RGU297957N0927506E	RGS297957N0927506E	20091021	Google Earth	Simple	Glacier forefield-connected	Geomorphological	Relict	Extended	Mono-unit	0.00979746	0.0523827	5074.87	5027	389.086	-0.997919	-1.89428	R2	NE	21.1438	29.749	92.7455
RGU297578N0927312E	RGS297578N0927312E	20091021	Google Earth	Complex	Glacier forefield-connected	Geomorphological	Transitional	Extended	Mono-unit	0.00895969	0.0582414	5299.81	5273	403.828	-1.4042	-2.95845	R2	E	13.908	29.784	92.7616	0.000516463	0.000742098
RGU297490N0927455E	RGS297490N0927455E	20091021	Google Earth	Simple	Glacier forefield-connected	Geomorphological	Transitional	Extended	Mono-unit	0.00937397	0.0610933	5285.27	5193	400.306	-1.22781	-2.56781	R2	NE	23.0737	29.7917	92.7603	0.00033226	0.000785913
RGU297840N0927616E	RGS297840N0927616E	20100208	Google Earth	Simple	Talus-connected	Geomorphological	Transitional	Extended	Mono-unit	0.00775928	0.043352	5172.53	5100	414.914	-1.24101	-4.09816	R2	NE	29.1631	29.7665	92.7706	0.000189623	0.000520708
RGU297917N0927603E	RGS297917N0927603E	20100208	Google Earth	Complex	Talus-connected	Geomorphological	Transitional	Extended	Mono-unit	0.0121302	0.0982032	5135.86	5077	414.687	-1.36008	-4.07951	R2	NE	23.6152	29.7695	92.7701	0.000522516	0.0013891
RGU297665N0927706E	RGS297665N0927706E	20100208	Google Earth	Simple	Talus-connected	Geomorphological	Transitional	Extended	Mono-unit	0.00676579	0.0270465	5038.59	4996	392.413	-1.25658	-1.75087	R2	W	23.9078	29.7831	92.7695	0.000142248	0.000295607
RGU297695N0927701E	RGS297695N0927701E	20100208	Google Earth	Complex	Talus-connected	Geomorphological	Active	Extended	Mono-unit	0.00565822	0.0196343	5027.04	5016	407.758	-1.5365	-3.44721	R2	W	11.5961	29.7797	92.7688	0.000208197	0.000201281
RGU297831N0927695E	RGS297831N0927695E	20100310	Google Earth	Complex	Debris-mantled slope-connected	Geomorphological	Relict	Extended	Mono-unit	0.0110512	0.0675314	5103.86	5035	392.14	-1.2543	-2.65088	R2	SE	23.0707	29.6373	92.7846
RGU297797N0927688E	RGS297797N0927688E	20100208	Google Earth	Complex	Talus-connected	Geomorphological	Active	Extended	Mono-unit	0.0214253	0.165648	5305.8	5225	393.98	-1.00299	-2.74436	R2	S	15.1978	29.6429	92.783	0.00134682	0.00260139
RGU296373N0927846E	RGS296373N0927846E	20100208	Google Earth	Complex	Talus-connected	Geomorphological	Active	Extended	Mono-unit	0.00903632	0.0529763	5261.86	5224	400.293	-0.965208	-3.3133	R2	NE	21.2329	29.6486	92.7828	0.000311787	0.000662339
RGU296429N0927830E	RGS296429N0927830E	20100208	Google Earth	Complex	Talus-connected	Geomorphological	Active	Extended	Mono-unit	0.00924156	0.0595568	5337.88	5290	400.293	-0.672748	-3.3133	R2	NE	24.5802	29.6508	92.7792	0.000305174	0.000762254
RGU296486N0927828E	RGS296486N0927828E	20100208	Google Earth	Complex	Glacier forefield-connected	Geomorphological	Transitional	Extended	Mono-unit	0.021458	0.177874	5198.8	5117	395.724	-1.17911	-2.90856	R2	NE	17.2737	29.6635	92.7751	0.0012768	0.00283346
RGU296508N0927792E	RGS296508N0927792E	20100208	Google Earth	Complex	Glacier forefield-connected	Geomorphological	Active	Extended	Mono-unit	0.0265122	0.248546	5305.99	5213	403.299	-0.481122	-3.12957	R2	NE	13.4884	29.7265	92.7941	0.00227125	0.00423323
RGU296635N0927751E	RGS296635N0927751E	20100208	Google Earth	Simple	Glacier forefield-connected	Geomorphological	Active	Extended	Mono-unit	0.00869781	0.0324618	5165.51	5114	404.093	-0.459041	-3.12033	R2	N	18.8195	29.7292	92.7995	0.000214487	0.000367984
RGU297265N0927941E	RGS297265N0927941E	20100208	Google Earth	Complex	Talus-connected	Geomorphological	Active	Extended	Mono-unit	0.00642957	0.0192546	5397.48	5375	399.158	-0.70131	-2.59248	R2	N	10.3396	29.7408	92.7943	0.000228659	0.000196618
RGU297292N0927995E	RGS297292N0927995E	20100208	Google Earth	Complex	Glacier forefield-connected	Geomorphological	Active	Extended	Mono-unit	0.0145853	0.0772719	5360.56	5283	395.06	-0.70131	-2.15373	R2	NE	15.3261	29.7435	92.7959	0.000623131	0.00104186
RGU297408N0927943E	RGS297408N0927943E	20100208	Google Earth	Complex	Talus-connected	Geomorphological	Active	Extended	Mono-unit	0.0316806	0.198888	5302.5	5134	399.148	-0.592106	-2.39414	R2	NE	15.7813	29.7542	92.8037	0.00155873	0.00323976
RGU297435N0927959E	RGS297435N0927959E	20091021	Google Earth	Complex	Talus-connected	Geomorphological	Transitional	Extended	Mono-unit	0.0186875	0.15083	5305.48	5253	410.4	-1.26144	-3.31113	R2	N	11.9591	29.8244	92.774	0.00155148	0.00232471
RGU297542N0928037E	RGS297542N0928037E	20091021	Google Earth	Complex	Talus-connected	Geomorphological	Transitional	Extended	Mono-unit	0.024292	0.356056	5282.35	5200	410.84	-1.17211	-3.16204	R2	NW	19.424	29.8398	92.7716	0.00228207	0.00651636
RGU298244N0927740E	RGS298244N0927740E	20091021	Google Earth	Complex	Glacier forefield-connected	Geomorphological	Relict	Extended	Mono-unit	0.0112444	0.0701243	5251.61	5221	404.901	-0.90319	-2.46261	R2	N	11.4506	29.8409	92.786
RGU298398N0927716E	RGS298398N0927716E	20091021	Google Earth	Simple	Glacier forefield-connected	Geomorphological	Relict	Extended	Mono-unit	0.00891457	0.0346154	5220.52	5197	404.901	-0.90319	-2.46261	R2	N	11.0041	29.8422	92.7866
RGU298409N0927860E	RGS298409N0927860E	20091021	Google Earth	Simple	Talus-connected	Geomorphological	Relict	Extended	Mono-unit	0.00737586	0.0312766	5144.61	5113	411.628	-1.2987	-3.16387	R2	SW	22.1596	29.8326	92.7983
RGU298422N0927866E	RGS298422N0927866E	20091021	Google Earth	Simple	Talus-connected	Geomorphological	Relict	Extended	Mono-unit	0.00546667	0.0233705	5181.34	5158	411.628	-1.17936	-3.16387	R2	W	19.8044	29.829	92.8003
RGU298326N0927983E	RGS298326N0927983E	20091021	Google Earth	Complex	Glacier forefield-connected	Geomorphological	Transitional	Extended	Mono-unit	0.0167539	0.115861	5304.64	5247	408.915	-1.40414	-3.17678	R2	SW	16.4676	29.815	92.779	0.000871168	0.00169398
RGU298290N0928003E	RGS298290N0928003E	20091021	Google Earth	Complex	Talus-connected	Geomorphological	Active	Extended	Mono-unit	0.0252103	0.122338	5211.19	5121	404.258	-1.16735	-2.7481	R2	NW	17.8373	29.8146	92.7741	0.000851269	0.00180823
RGU298150N0927790E	RGS298150N0927790E	20091021	Google Earth	Complex	Glacier forefield-connected	Geomorphological	Transitional	Extended	Mono-unit	0.0228909	0.213427	5308.74	5239	405.741	-1.04713	-2.91358	R2	SW	15.2123	29.8053	92.7741	0.00173367	0.00352599
RGU298146N0927741E	RGS298146N0927741E	20091021	Google Earth	Complex	Glacier forefield-connected	Geomorphological	Transitional	Extended	Mono-unit	0.0160073	0.13806	5295.76	5243	405.505	-1.1105	-2.89105	R2	W	10.4598	29.7988	92.7745	0.0016209	0.00209056
RGU298053N0927741E	RGS298053N0927741E	20091021	Google Earth	Complex	Glacier forefield-connected	Geomorphological	Transitional	Extended	Mono-unit	0.0189307	0.167397	5272.32	5202	404.344	-1.1076	-2.79357	R2	W	11.2012	29.7931	92.774	0.00183676	0.0026344
RGU297988N0927745E	RGS297988N0927745E	20100208	Google Earth	Complex	Talus-connected	Geomorphological	Active	Extended	Mono-unit	0.017082	0.117023	5419.9	5380	406.759	-0.9341	-3.29656	R2	W	11.7301	29.7537	92.7827	0.00122688	0.00171438
RGU297931N0927740E	RGS297931N0927740E	20100208	Google Earth	Complex	Talus-connected	Geomorphological	Transitional	Extended	Mono-unit	0.0116478	0.085026	5320.29	5262	406.382	-0.495995	-2.78596	R2	NE	14.4899	29.8011	92.7998	0.00072431	0.00116854
RGU297537N0927827E	RGS297537N0927827E	20100208	Google Earth	Complex	Talus-connected	Geomorphological	Transitional	Extended	Mono-unit	0.0141647	0.12576	5377.05	5316	414.86	-0.410568	-3.71167	R2	NE	16.2146	29.8018	92.7949	0.000959949	0.0018691
RGU298011N0927998E	RGS298011N0927998E	20100208	Google Earth	Complex	Glacier forefield-connected	Geomorphological	Transitional	Extended	Mono-unit	0.0345817	0.372425	5337.3	5214	403.797	-0.558502	-2.59529	R2	SE	18.6123	29.7968	92.8039	0.00248715	0.00687749
RGU298018N0927949E	RGS298018N0927949E	20100208	Google Earth	Simple	Talus-connected	Geomorphological	Active	Extended	Mono-unit	0.00632311	0.0274331	5220.56	5209	407.435	-0.579393	-3.12055	R2	W	11.6473	29.7732	92.8009	0.000289629	0.000300685
RGU297968N0928039E	RGS297968N0928039E	20100208	Google Earth	Simple	Talus-connected	Geomorphological	Active	Extended	Mono-unit	0.00735831	0.0371843	5170.63	5139	414.914	-1.3362	-4.09816	R2	E	18.246	29.7639	92.7724	0.000253137	0.000433126
RGU297732N0928009E	RGS297732N0928009E	20100208	Google Earth	Complex	Talus-connected	Geomorphological	Active	Extended	Mono-unit	0.0112009	0.0766104	5161.68	5131	409.618	-1.3362	-3.65533	R2	SW	16.8649	29.7637	92.7735	0.000562848	0.00103116
RGU297639N0927724E	RGS297639N0927724E	20100208	Google Earth	Complex	Talus-connected	Geomorphological	Active	Extended	Mono-unit	0.0107095	0.0397133	5334.07	5310	401.349	-0.35133	-3.03395	R2	NE	14.1046	29.7143	92.7889	0.000347352	0.000468712
RGU297143N0927889E	RGS297143N0927889E	20100208	Google Earth	Complex	Glacier forefield-connected	Geomorphological	Active	Extended	Mono-unit	0.0122303	0.0763792	5323.82	5302	401.349	-0.449565	-3.03395	R2	S	12.4797	29.7092	92.7892	0.000753369	0.00102743
RGU297122N0927924E	RGS297122N0927924E	20100208	Google Earth	Complex	Talus-connected	Geomorphological	Active	Extended	Mono-unit	0.00977674	0.0473638	5388.63	5349	414.119	-0.47449	-4.30161	R2	NE	22.214	29.7072	92.7831	0.000267026	0.000579053
RGU297092N0927892E	RGS297092N0927892E	20100208	Google Earth	Simple	Talus-connected	Geomorphological	Active	Extended	Mono-unit	0.00646597	0.0245449	5381.21	5346	408.821	-1.0464	-3.84258	R2	NE	27.6565	29.6938	92.7823	0.000112709	0.000263109
RGU297072N0927831E	RGS297072N0927831E	20100208	Google Earth	Complex	Glacier forefield-connected	Geomorphological	Active	Extended	Mono-unit	0.0165378	0.142527	5263.04	5145	401.155	-1.14589	-3.06483	R2	E	21.8511	29.6936	92.7886	0.00081621	0.002172
RGU296938N0927823E	RGS296938N0927823E	20100208	Google Earth	Complex	Glacier forefield-connected	Geomorphological	Transitional	Extended	Mono-unit	0.0256711	0.232379	5057.63	5023	410.485	-0.370718	-3.69837	R2	NW	12.4233	29.7064	92.7983	0.00230232	0.00390498
RGU296936N0927886E	RGS296253N0927825E	20100208	Google Earth	Simple	Debris-mantled slope-connected	Geomorphological	Active	Extended	Multi-unit	0.00802666	0.0413669	5170.56	5133	366.76	-0.73342	-0.348044	R2	N	17.4176	29.625	92.7828	0.00029456	0.000492227
RGU297064N0927983E	RGS296253N0927825E	20100208	Google Earth	Complex	Glacier forefield-connected	Geomorphological	Active	Extended	Multi-unit	0.00925471	0.0644564	5215.37	5181	373.961	-0.73342	-1.22059	R2	NW	13.3439	29.624	92.7845	0.000595271	0.000838112
RGU296250N0927828E	RGS296250N0927828E	20100208	Google Earth	Complex	Glacier forefield-connected	Geomorphological	Active	Extended	Mono-unit	0.0217979	0.177052	5248.83	5104	397.254	-0.853297	-3.10141	R2	SW	18.4151	29.6296	92.7866	0.00119462	0.00281776
RGU296240N0927845E	RGS296240N0927845E	20100208	Google Earth	Simple	Debris-mantled slope-connected	Geomorphological	Active	Extended	Mono-unit	0.006457	0.0239766	5352.14	5318	390.327	-0.75758	-2.52942	R2	N	22.244	29.6244	92.7894	0.000135001	0.000255816
RGU296296N0927866E	RGS296296N0927866E	20100208	Google Earth	Complex	Talus-connected	Geomorphological	Active	Extended	Mono-unit	0.0185084	0.21989	5210.77	5152	399.01	-1.47563	-3.08649	R2	N	12.2632	29.643	92.7977	0.00220659	0.00365452
RGU296244N0927894E	RGS296244N0927894E	20100208	Google Earth	Complex	Talus-connected	Geomorphological	Active	Extended	Mono-unit	0.013828	0.105971	5332.84	5257	381.901	-1.3913	-1.56874	R2	SW	17.8342	29.6537	92.7923	0.000737512	0.00152198
RGU296430N0927977E	RGS296430N0927977E	20100208	Google Earth	Simple	Talus-connected	Geomorphological	Transitional	Extended	Mono-unit	0.0139895	0.0744452	5292.78	5220	370.235	-0.459496	-0.579675	R2	SW	18.0423	29.6147	92.7968	0.000512325	0.000996292
RGU296537N0927923E	RGS296537N0927923E	20100208	Google Earth	Complex	Debris-mantled slope-connected	Geomorphological	Transitional	Extended	Mono-unit	0.00644615	0.0275631	5351.94	5322	389.344	-0.4647	-2.35908	R2	S	21.2492	29.6183	92.7962	0.000162102	0.000302397
RGU296147N0927968E	RGS296147N0927968E	20100208	Google Earth	Simple	Talus-connected	Geomorphological	Active	Extended	Mono-unit	0.0204425	0.159831	5068.48	4920	389.047	-1.16166	-1.43426	R2	E	20.1879	29.7426	92.8075	0.00098717	0.00249215
RGU296183N0927962E	RGS296183N0927962E	20100208	Google Earth	Complex	Talus-connected	Geomorphological	Active	Extended	Mono-unit	0.0263955	0.172028	5293.73	5195	402.412	-0.628187	-2.63725	R2	NE	15.1202	29.7666	92.8082	0.0014057	0.00272208
RGU297426N0928075E	RGS297426N0928075E	20100208	Google Earth	Complex	Talus-connected	Geomorphological	Active	Extended	Mono-unit	0.0145627	0.0574799	5211.4	5147	416.058	-0.356804	-3.72432	R2	N	11.2123	29.7837	92.8201	0.000630081	0.000730469
RGU297666N0928082E	RGS297666N0928082E	20100208	Google Earth	Complex	Talus-connected	Geomorphological	Active	Extended	Mono-unit	0.00804257	0.0339997	5287	5252	407.699	-0.52655	-2.83913	R2	NE	12.843	29.7807	92.8173	0.000326025	0.000389002
RGU297837N0928201E	RGS297837N0928201E	20100208	Google Earth	Complex	Talus-connected	Geomorphological	Transitional	Extended	Mono-unit	0.0281896	0.281582	5104.62	5041	413.013	-0.837765	-3.45697	R2	NW	11.4239	29.7923	92.8085	0.00303019	0.00491709
RGU297807N0928173E	RGS297807N0928173E	20100208	Google Earth	Complex	Talus-connected	Geomorphological	Transitional	Extended	Mono-unit	0.0147045	0.1153	5162.5	5128	409.521	-0.940685	-3.2811	R2	W	17.0109	29.7839	92.8041	0.000840044	0.00168415
RGU297923N0928085E	RGS297923N0928085E	20100208	Google Earth	Complex	Glacier forefield-connected	Geomorphological	Transitional	Extended	Mono-unit	0.0220154	0.163138	5256.82	5180	408.968	-0.79623	-3.23018	R2	W	15.1765	29.7794	92.8026	0.00132823	0.00255416
RGU297839N0928041E	RGS297839N0928041E	20091021	Google Earth	Complex	Talus-connected	Geomorphological	Relict	Extended	Mono-unit	0.0188218	0.147413	5007.05	4900	411.66	0.237754	-2.74162	R2	N	15.5755	29.8809	92.8081
RGU297794N0928026E	RGS297794N0928026E	20091021	Google Earth	Simple	Talus-connected	Geomorphological	Transitional	Extended	Mono-unit	0.00657821	0.0267865	5182.58	5132	408.255	0.1759	-2.47115	R2	NE	24.542	29.867	92.8094	0.000137457	0.0002922
RGU298809N0928081E	RGS298809N0928081E	20091021	Google Earth	Complex	Talus-connected	Geomorphological	Transitional	Extended	Mono-unit	0.0176436	0.148295	5193.5	5106	408.952	0.79068	-2.58209	R2	N	14.5839	29.8564	92.813	0.00125531	0.00227789
RGU298670N0928094E	RGS298670N0928094E	20091021	Google Earth	Simple	Talus-connected	Geomorphological	Transitional	Extended	Mono-unit	0.00550285	0.0167311	5093.7	5067	405.044	1.2867	-2.0694	R2	NW	25.4559	29.8594	92.8158	8.29691e-05	0.000166116
RGU298564N0928130E	RGS298564N0928130E	20091021	Google Earth	Complex	Talus-connected	Geomorphological	Transitional	Extended	Mono-unit	0.0215178	0.216997	5240.17	5149	410.459	0.0325958	-2.74897	R2	NE	13.7997	29.8465	92.8141	0.00193905	0.00359689
RGU298594N0928158E	RGS298594N0928158E	20091021	Google Earth	Complex	Talus-connected	Geomorphological	Transitional	Extended	Mono-unit	0.016229	0.10446	5218.17	5141	412.896	0.13309	-3.16268	R2	N	13.7113	29.8335	92.8162	0.000939344	0.00149597
RGU298465N0928141E	RGS298465N0928141E	20091021	Google Earth	Simple	Talus-connected	Geomorphological	Transitional	Extended	Mono-unit	0.0107001	0.0744018	5035.75	4973	414.602	0.153267	-3.22033	R2	N	24.1852	29.8369	92.8207	0.000387086	0.000995595
RGU298369N0928207E	RGS296253N0927825E	20091021	Google Earth	Simple	Talus-connected	Geomorphological	Transitional	Extended	Multi-unit	0.00576051	0.015409	4968.56	4938	397.792	0.167204	-1.66665	R2	N	20.274	29.8216	92.8214	9.47836e-05	0.000150491
RGU298216N0928214E	RGS298216N0928214E	20091021	Google Earth	Simple	Talus-connected	Geomorphological	Transitional	Extended	Mono-unit	0.00553015	0.0131277	5104.5	5081	397.792	0.394523	-1.66665	R2	N	17.9168	29.8185	92.8181	9.09554e-05	0.000124168
RGU298207N0928207E	RGS298207N0928207E	20100310	Google Earth	Simple	Talus-connected	Geomorphological	Active	Extended	Mono-unit	0.00873662	0.0569705	5309.98	5274	395.513	-1.5787	-2.79823	R2	SW	17.1083	29.6333	92.8032	0.000412777	0.000722707
RGU298185N0928181E	RGS298185N0928181E	20100310	Google Earth	Simple	Glacier forefield-connected	Geomorphological	Active	Extended	Mono-unit	0.00965202	0.0629514	5166.8	5110	397.712	-1.48914	-2.70261	R2	E	14.2951	29.6406	92.8292	0.000543415	0.000814683
RGU296333N0928032E	RGS296333N0928032E	20100310	Google Earth	Complex	Debris-mantled slope-connected	Geomorphological	Transitional	Extended	Mono-unit	0.00725363	0.0330753	5060.88	5019	387.997	-1.26747	-1.74223	R2	W	20.3711	29.6475	92.8316	0.000202524	0.000376346
RGU296406N0928292E	RGS296406N0928292E	20100310	Google Earth	Complex	Talus-connected	Geomorphological	Active	Extended	Mono-unit	0.0337634	0.326334	5136.37	5000	396.323	-1.34089	-2.46478	R2	W	14.4995	29.6526	92.8319	0.00277814	0.00586917
RGU296475N0928316E	RGS296475N0928316E	20100208	Google Earth	Simple	Talus-connected	Geomorphological	Active	Extended	Mono-unit	0.0104704	0.0818021	5028.69	5004	394.936	-0.756077	-2.45408	R2	N	15.152	29.6579	92.8265	0.000667065	0.00111558
RGU296526N0928319E	RGS296526N0928319E	20100208	Google Earth	Complex	Talus-connected	Geomorphological	Active	Extended	Mono-unit	0.0113737	0.0731194	5049.66	5021	403.312	-0.76122	-3.23631	R2	N	15.0514	29.6594	92.8185	0.000600151	0.000975038
RGU296579N0928265E	RGS296579N0928265E	20100310	Google Earth	Simple	Talus-connected	Geomorphological	Active	Extended	Mono-unit	0.0111225	0.0743332	5323.99	5266	375.81	-0.41201	-1.02952	R2	E	15.5571	29.6134	92.8067	0.000590747	0.000994494
RGU296594N0928185E	RGS296594N0928185E	20100310	Google Earth	Simple	Talus-connected	Geomorphological	Active	Extended	Mono-unit	0.0100029	0.0722035	5269.66	5221	380.172	-0.173114	-1.43151	R2	E	18.4296	29.611	92.8086	0.000486807	0.0009604
RGU296134N0928067E	RGS296134N0928067E	20100310	Google Earth	Complex	Talus-connected	Geomorphological	Active	Extended	Mono-unit	0.0212583	0.179514	5144.58	5051	380.172	-0.519894	-1.43151	R2	NE	19.8613	29.6154	92.8143	0.00112621	0.00286483
RGU296110N0928086E	RGS296110N0928086E	20100310	Google Earth	Simple	Talus-connected	Geomorphological	Active	Extended	Mono-unit	0.0118798	0.0689297	5278.39	5214	380.685	-0.41201	-1.41288	R2	NE	15.2863	29.6172	92.8065	0.000557271	0.000908385
RGU296154N0928143E	RGS296154N0928143E	20100310	Google Earth	Complex	Talus-connected	Geomorphological	Active	Extended	Mono-unit	0.0179755	0.116049	5267.89	5195	400.609	-0.773053	-3.2695	R2	SW	18.6847	29.6215	92.8159	0.000772112	0.00169728
RGU296172N0928065E	RGS296172N0928065E	20100310	Google Earth	Complex	Glacier forefield-connected	Geomorphological	Active	Extended	Mono-unit	0.013062	0.0966352	5273.18	5202	398.716	-1.50462	-2.88318	R2	NE	14.1466	29.6413	92.8228	0.000842759	0.00136253
RGU296215N0928159E	RGS296215N0928159E	20100208	Google Earth	Complex	Glacier forefield-connected	Geomorphological	Active	Extended	Mono-unit	0.0083052	0.0440899	5301.66	5258	400.678	-0.809422	-2.85032	R2	NE	18.6513	29.6773	92.8325	0.000293851	0.000531361
RGU296413N0928228E	RGS296413N0928228E	20100208	Google Earth	Complex	Glacier forefield-connected	Geomorphological	Active	Extended	Mono-unit	0.0151755	0.145712	5142.53	5041	396.175	-0.610639	-2.43413	R2	NE	23.471	29.6982	92.8125	0.000779787	0.00223037
RGU296773N0928325E	RGS296773N0928325E	20100208	Google Earth	Simple	Talus-connected	Geomorphological	Active	Extended	Mono-unit	0.009914	0.0713541	5377.32	5334	395.919	-1.1179	-2.56747	R2	E	24.1692	29.6726	92.813	0.00037146	0.000946859
RGU296982N0928125E	RGS296982N0928125E	20100208	Google Earth	Complex	Talus-connected	Geomorphological	Active	Extended	Mono-unit	0.0146561	0.0834835	5321.67	5264	397.671	-0.995007	-2.6308	R2	E	17.5534	29.672	92.8223	0.000590001	0.00114315
RGU296720N0928223E	RGS296720N0928223E	20100208	Google Earth	Complex	Glacier forefield-connected	Geomorphological	Active	Extended	Mono-unit	0.0109611	0.0594529	5372.88	5332	407.534	-1.3283	-3.33178	R2	W	18.7405	29.6953	92.8278	0.000394423	0.00076066
RGU296771N0928214E	RGS296771N0928214E	20100208	Google Earth	Complex	Glacier forefield-connected	Geomorphological	Active	Extended	Mono-unit	0.012523	0.0676506	5340.92	5292	407.074	-1.3283	-3.2703	R2	W	18.6443	29.6985	92.8268	0.000451042	0.000888196
RGU297052N0928325E	RGS297052N0928325E	20100208	Google Earth	Simple	Talus-connected	Geomorphological	Active	Extended	Mono-unit	0.00563862	0.0228578	5417.21	5393	414.432	-0.95224	-3.89892	R2	SW	20.1831	29.7095	92.8282	0.00014121	0.000241559
RGU297040N0928326E	RGS297040N0928326E	20100208	Google Earth	Complex	Talus-connected	Geomorphological	Active	Extended	Mono-unit	0.0110626	0.060813	5303.68	5260	393.634	-0.842674	-2.03559	R2	SW	13.2647	29.7058	92.8206	0.000564917	0.000781588
RGU297095N0928282E	RGS297095N0928282E	20100208	Google Earth	Simple	Talus-connected	Geomorphological	Active	Extended	Mono-unit	0.00668194	0.0267266	5451.55	5396	413.102	-1.0308	-3.77877	R2	W	22.1192	29.716	92.827	0.000151291	0.000291417
RGU297058N0928206E	RGS297058N0928206E	20100208	Google Earth	Complex	Talus-connected	Geomorphological	Active	Extended	Mono-unit	0.0215363	0.149431	5309	5257	406.01	-1.06093	-3.21893	R2	NW	10.3061	29.7167	92.8181	0.00178028	0.00229885
RGU297160N0928270E	RGS297160N0928270E	20100208	Google Earth	Complex	Talus-connected	Geomorphological	Active	Extended	Mono-unit	0.00818301	0.0332194	5421.54	5397	408.778	-1.17677	-3.42477	R2	SE	13.6543	29.7205	92.8239	0.000299944	0.000378314
RGU297167N0928181E	RGS297167N0928181E	20100208	Google Earth	Complex	Glacier forefield-connected	Geomorphological	Transitional	Extended	Mono-unit	0.00985875	0.0570976	5290.48	5236	391.895	-1.14481	-1.73242	R2	NW	13.3818	29.7298	92.8168	0.000525846	0.000724643
RGU297205N0928239E	RGS297205N0928239E	20100208	Google Earth	Complex	Glacier forefield-connected	Geomorphological	Transitional	Extended	Mono-unit	0.0166564	0.137581	5301.03	5233	406.524	-0.86991	-3.01634	R2	NE	13.6385	29.7429	92.8228	0.00124366	0.00208187
RGU297298N0928168E	RGS297298N0928168E	20100208	Google Earth	Complex	Glacier forefield-connected	Geomorphological	Transitional	Extended	Mono-unit	0.0293252	0.358577	5066.18	4899	392.664	-1.16104	-1.782	R2	W	22.1407	29.74	92.8128	0.00202793	0.00657175
RGU297429N0928228E	RGS297429N0928228E	20100208	Google Earth	Complex	Talus-connected	Geomorphological	Transitional	Extended	Mono-unit	0.0152666	0.146251	5010.57	4935	389.757	-0.74361	-1.76517	R2	N	16.1016	29.661	92.8462	0.00112399	0.00224028
RGU297400N0928128E	RGS297400N0928128E	20100208	Google Earth	Complex	Talus-connected	Geomorphological	Relict	Extended	Mono-unit	0.0102897	0.0671171	5015.26	4959	391.972	-0.74361	-1.91887	R2	N	24.681	29.6607	92.8494
RGU296610N0928462E	RGS296610N0928462E	20100310	Google Earth	Complex	Talus-connected	Geomorphological	Active	Extended	Mono-unit	0.0426007	0.4329	4904.81	4743	383.519	0.705481	-1.18064	R2	N	16.7265	29.6091	92.8679	0.00320603	0.00823849
RGU296607N0928494E	RGS296607N0928494E	20100310	Google Earth	Complex	Talus-connected	Geomorphological	Active	Extended	Mono-unit	0.00723234	0.0341875	5219.38	5177	400.947	0.36628	-2.7647	R2	S	17.5527	29.6287	92.8736	0.000241622	0.000391583
RGU296091N0928679E	RGS296091N0928679E	20100310	Google Earth	Complex	Talus-connected	Geomorphological	Active	Extended	Mono-unit	0.0310926	0.280548	5057.16	4960	391.476	1.02223	-2.03356	R2	NE	16.9644	29.6174	92.8626	0.00204942	0.00489543
RGU296287N0928736E	RGS296287N0928736E	20100310	Google Earth	Simple	Talus-connected	Geomorphological	Active	Extended	Mono-unit	0.0100101	0.051661	5195.03	5120	399.054	0.91748	-2.81096	R2	NE	19.7078	29.6197	92.856	0.000326528	0.000642654
RGU296174N0928626E	RGS296174N0928626E	20100310	Google Earth	Complex	Talus-connected	Geomorphological	Active	Extended	Mono-unit	0.0196503	0.133191	5223.1	5108	388.967	0.37013	-1.77653	R2	E	20.9144	29.6251	92.8644	0.000795271	0.0020024
RGU296197N0928560E	RGS296197N0928560E	20100310	Google Earth	Simple	Glacier forefield-connected	Geomorphological	Active	Extended	Mono-unit	0.00860525	0.0422464	5306.65	5247	400.947	0.0844041	-2.7647	R2	S	22.6535	29.6303	92.8721	0.000233791	0.000504812
RGU296251N0928644E	RGS296251N0928644E	20100310	Google Earth	Complex	Glacier forefield-connected	Geomorphological	Active	Extended	Mono-unit	0.0150389	0.132409	5142.06	5057	397.33	0.732392	-2.32012	R2	NE	16.7489	29.631	92.8813	0.000979342	0.00198831
RGU296303N0928721E	RGS296303N0928721E	20100310	Google Earth	Simple	Debris-mantled slope-connected	Geomorphological	Active	Extended	Mono-unit	0.0109445	0.0676328	5195.6	5127	396.281	0.931524	-2.0814	R2	W	22.3177	29.6425	92.8839	0.000379617	0.000887915
RGU296310N0928813E	RGS296310N0928813E	20100310	Google Earth	Complex	Debris-mantled slope-connected	Geomorphological	Active	Extended	Mono-unit	0.00926446	0.0618796	5177.38	5151	396.281	0.589981	-2.0814	R2	NW	14.1922	29.6417	92.8819	0.000537955	0.000798067
RGU296425N0928839E	RGS296425N0928839E	20100310	Google Earth	Simple	Debris-mantled slope-connected	Geomorphological	Active	Extended	Mono-unit	0.00818156	0.0411975	5189.75	5163	397.635	0.55266	-2.28247	R2	N	18.4296	29.6422	92.8773	0.000277759	0.00048981
RGU296417N0928819E	RGS296417N0928819E	20100310	Google Earth	Complex	Talus-connected	Geomorphological	Active	Extended	Mono-unit	0.0120981	0.0756837	5324.68	5257	401.313	0.25031	-2.64655	R2	NE	19.8266	29.644	92.8712	0.000475615	0.00101621
RGU296422N0928773E	RGS296422N0928773E	20100310	Google Earth	Complex	Talus-connected	Geomorphological	Active	Extended	Mono-unit	0.0114917	0.0854938	5000.35	4946	397.507	0.619525	-2.16975	R2	NW	19.7848	29.6482	92.8836	0.000538354	0.00117626
RGU296440N0928712E	RGS296440N0928712E	20100310	Google Earth	Complex	Talus-connected	Geomorphological	Active	Extended	Mono-unit	0.0186654	0.0870336	4901.82	4784	392.144	0.360638	-1.62223	R2	N	17.4098	29.6527	92.8849	0.000620005	0.00120173
RGU296482N0928836E	RGS296482N0928836E	20100310	Google Earth	Complex	Glacier forefield-connected	Geomorphological	Active	Extended	Mono-unit	0.016468	0.115857	5240.97	5173	405.611	0.0881091	-3.04549	R2	NE	14.4745	29.6527	92.8742	0.000987977	0.00169391
RGU296527N0928849E	RGS296527N0928849E	20100310	Google Earth	Complex	Glacier forefield-connected	Geomorphological	Active	Extended	Mono-unit	0.0127879	0.0878001	5156.11	5115	403.423	0.39343	-2.64932	R2	N	12.0035	29.6537	92.8765	0.000899842	0.00121444
RGU296527N0928742E	RGS296527N0928742E	20100310	Google Earth	Complex	Glacier forefield-connected	Geomorphological	Transitional	Extended	Mono-unit	0.0188571	0.125873	5025.63	4876	390.686	0.12144	-1.41167	R2	NE	17.5844	29.6613	92.8812	0.000888059	0.00187112
RGU296537N0928765E	RGS296537N0928765E	20100208	Google Earth	Complex	Glacier forefield-connected	Geomorphological	Active	Extended	Mono-unit	0.0143279	0.139703	5145.23	5088	400.146	-0.41457	-2.62819	R2	N	13.8221	29.679	92.848	0.00124638	0.00212045
RGU296613N0928812E	RGS296613N0928812E	20100208	Google Earth	Complex	Glacier forefield-connected	Geomorphological	Active	Extended	Mono-unit	0.0124576	0.0997111	5235.91	5158	402.59	-0.148961	-2.93345	R2	N	20.5108	29.6758	92.843	0.000606561	0.00141473
RGU296790N0928480E	RGS296790N0928480E	20100208	Google Earth	Simple	Glacier forefield-connected	Geomorphological	Active	Extended	Mono-unit	0.00433629	0.0144214	5342.61	5312	402.59	0.010856	-2.93345	R2	N	26.9487	29.6732	92.8394	6.78268e-05	0.000138993
RGU296732N0928394E	RGS296732N0928394E	20100208	Google Earth	Complex	Glacier forefield-connected	Geomorphological	Active	Extended	Mono-unit	0.00897573	0.0520942	5255.35	5189	402.59	-0.499336	-2.93345	R2	NE	20.7942	29.6767	92.8393	0.000312768	0.000649127
RGU296741N0928403E	RGS296741N0928403E	20100208	Google Earth	Complex	Glacier forefield-connected	Geomorphological	Transitional	Extended	Mono-unit	0.0396181	0.461801	5086.6	4886	406.565	-0.541225	-2.90297	R2	NE	21.4827	29.7334	92.8518	0.00268775	0.00890283
RGU296767N0928393E	RGS296767N0928393E	20100208	Google Earth	Complex	Talus-connected	Geomorphological	Active	Extended	Mono-unit	0.0100727	0.057922	5358.51	5301	407.154	-1.8725	-2.68255	R2	W	25.6199	29.7084	92.8872	0.000285519	0.000737216
RGU297334N0928518E	RGS297334N0928518E	20100208	Google Earth	Complex	Glacier forefield-connected	Geomorphological	Active	Extended	Mono-unit	0.00744824	0.0372311	5287.89	5256	406.326	-1.2382	-2.86427	R2	NW	23.8399	29.7116	92.8638	0.000196338	0.00043378
RGU297084N0928872E	RGS297084N0928872E	20100208	Google Earth	Complex	Glacier forefield-connected	Geomorphological	Active	Extended	Mono-unit	0.00769227	0.0426132	5335.76	5294	408.384	-0.87006	-3.0367	R2	W	17.0222	29.7082	92.8644	0.000310267	0.000510077
RGU297116N0928638E	RGS297116N0928638E	20100208	Google Earth	Simple	Talus-connected	Geomorphological	Active	Extended	Mono-unit	0.00490493	0.0134575	5356.27	5331	411.2	-0.87006	-3.38156	R2	W	21.8112	29.7044	92.8639	7.72014e-05	0.000127921
RGU297082N0928644E	RGS297082N0928644E	20100208	Google Earth	Complex	Talus-connected	Geomorphological	Active	Extended	Mono-unit	0.0241868	0.179279	5179.54	5111	408.066	-1.20513	-2.93691	R2	N	18.5502	29.7192	92.865	0.00120114	0.00286034
RGU297044N0928639E	RGS297404N0928435E	20100208	Google Earth	Simple	Talus-connected	Geomorphological	Active	Extended	Multi-unit	0.0185554	0.125523	5159.18	5042	398.898	-0.6439	-2.0715	R2	NE	15.0613	29.7414	92.845	0.00102961	0.00186489
RGU297192N0928650E	RGS297404N0928435E	20100208	Google Earth	Simple	Talus-connected	Geomorphological	Active	Extended	Multi-unit	0.00632235	0.029955	5262.14	5248	401.859	-0.50362	-2.43766	R2	NE	9.56958	29.7364	92.8366	0.000384058	0.000334154
RGU297414N0928450E	RGS297404N0928435E	20100208	Google Earth	Simple	Glacier forefield-connected	Geomorphological	Active	Extended	Multi-unit	0.00937511	0.0472949	5256.57	5230	398.898	-0.5402	-2.0715	R2	NE	13.0224	29.7381	92.8382	0.000447372	0.000578043
RGU297364N0928366E	RGS297364N0928366E	20100208	Google Earth	Simple	Talus-connected	Geomorphological	Active	Extended	Mono-unit	0.00786899	0.0286636	5165.22	5142	389.462	-0.88756	-1.09137	R2	NW	13.9641	29.7407	92.8597	0.000253178	0.000316942
RGU297381N0928382E	RGS297381N0928382E	20100208	Google Earth	Complex	Glacier forefield-connected	Geomorphological	Active	Extended	Mono-unit	0.0151981	0.0981347	5263.67	5212	393.677	-0.951565	-1.4445	R2	W	9.49929	29.7402	92.8638	0.00126742	0.00138794
RGU297407N0928597E	RGS297407N0928597E	20100208	Google Earth	Simple	Glacier forefield-connected	Geomorphological	Active	Extended	Mono-unit	0.00475731	0.0159584	5321.82	5308	413.866	-1.1734	-3.16389	R2	N	16.7874	29.7371	92.8678	0.000117771	0.000156953
RGU297402N0928638E	RGS297402N0928638E	20100208	Google Earth	Complex	Glacier forefield-connected	Geomorphological	Active	Extended	Mono-unit	0.00633522	0.0283129	5335	5314	416.737	-1.1734	-3.65154	R2	NW	16.9205	29.7371	92.869	0.000207349	0.000312294
RGU297371N0928678E	RGS297371N0928678E	20100208	Google Earth	Complex	Talus-connected	Geomorphological	Active	Extended	Mono-unit	0.00513191	0.0138402	5323	5297	412.952	-0.95098	-3.23985	R2	N	22.5304	29.7465	92.8659	7.69881e-05	0.000132298
RGU297371N0928690E	RGS297533N0928556E	20100208	Google Earth	Complex	Debris-mantled slope-connected	Geomorphological	Active	Extended	Multi-unit	0.0106955	0.0347364	5288.36	5268	412.952	-0.891732	-3.23985	R2	N	10.944	29.748	92.8633	0.000389989	0.000399139
RGU297465N0928659E	RGS297533N0928556E	20100208	Google Earth	Complex	Glacier forefield-connected	Geomorphological	Active	Extended	Multi-unit	0.0283481	0.215288	5218.64	5081	405.829	-0.93424	-2.57109	R2	NW	12.2893	29.7532	92.8558	0.00215589	0.00356292
RGU297480N0928633E	RGS297480N0928633E	20100208	Google Earth	Complex	Glacier forefield-connected	Geomorphological	Active	Extended	Mono-unit	0.0200333	0.145314	5222.74	5051	399.661	-0.957993	-1.95782	R2	W	19.0161	29.7584	92.8537	0.000950581	0.00222307
RGU297532N0928558E	RGS297532N0928558E	20100208	Google Earth	Complex	Talus-connected	Geomorphological	Active	Extended	Mono-unit	0.00954055	0.0483223	5378.71	5329	414.93	-0.779371	-3.25851	R2	E	23.1958	29.7527	92.8734	0.000261496	0.000593144
RGU297584N0928537E	RGS297584N0928537E	20100208	Google Earth	Complex	Glacier forefield-connected	Geomorphological	Active	Extended	Mono-unit	0.0246267	0.269035	5031.29	4820	405.727	-1.43059	-2.17942	R2	E	26.404	29.7678	92.8911	0.0012895	0.00465536
RGU297527N0928734E	RGS297527N0928734E	20100208	Google Earth	Complex	Glacier forefield-connected	Geomorphological	Active	Extended	Mono-unit	0.0178697	0.148698	5255.89	5183	417.783	-0.744374	-3.44987	R2	N	15.6621	29.7747	92.8782	0.00117402	0.00228533
RGU297678N0928911E	RGS297678N0928911E	20100208	Google Earth	Complex	Glacier forefield-connected	Geomorphological	Relict	Extended	Mono-unit	0.026321	0.243079	5199.76	5057	414.639	-0.529364	-3.19888	R2	E	14.7199	29.7907	92.8695
RGU297747N0928782E	RGS297747N0928782E	20100208	Google Earth	Complex	Glacier forefield-connected	Geomorphological	Active	Extended	Mono-unit	0.0111576	0.0790495	5276.32	5243	424.552	-0.54263	-4.15917	R2	NE	12.0464	29.795	92.8619	0.000807322	0.00107069
RGU297907N0928695E	RGS297907N0928695E	20100208	Google Earth	Complex	Glacier forefield-connected	Geomorphological	Active	Extended	Mono-unit	0.00620598	0.0218141	5285.77	5264	421.122	-0.61225	-3.87158	R2	E	15.2071	29.7418	92.8933	0.000177256	0.000228385
RGU297950N0928619E	RGS297950N0928619E	20100208	Google Earth	Complex	Glacier forefield-connected	Geomorphological	Active	Extended	Mono-unit	0.0122521	0.0706362	5292.58	5266	416.702	-0.63554	-3.40328	R2	SE	12.8753	29.7433	92.8938	0.000675662	0.000935439
RGU297418N0928933E	RGS297418N0928933E	20100208	Google Earth	Simple	Debris-mantled slope-connected	Geomorphological	Relict	Extended	Mono-unit	0.0110939	0.0563221	4890.69	4813	399.268	-1.0419	-1.55135	R2	NE	22.3956	29.7593	92.897
RGU297433N0928938E	RGS297433N0928938E	20100208	Google Earth	Complex	Glacier forefield-connected	Geomorphological	Transitional	Extended	Mono-unit	0.00885769	0.0437736	4959.41	4884	399.268	-0.745598	-1.55135	R2	NE	21.3516	29.7596	92.8934	0.000256259	0.00052679
RGU297593N0928970E	RGS297593N0928970E	20100208	Google Earth	Complex	Glacier forefield-connected	Geomorphological	Active	Extended	Mono-unit	0.0210181	0.164286	5066.34	4997	401.166	-0.678829	-1.76748	R2	NE	12.5252	29.7566	92.8904	0.00161465	0.00257575
RGU297596N0928934E	RGS297596N0928934E	20100208	Google Earth	Complex	Glacier forefield-connected	Geomorphological	Active	Extended	Mono-unit	0.00996618	0.0434184	5126.15	5100	407.381	-0.65919	-2.49967	R2	NE	11.7219	29.7537	92.8862	0.000455519	0.000521664
RGU297566N0928904E	RGS297566N0928904E	20100208	Google Earth	Complex	Talus-connected	Geomorphological	Active	Extended	Mono-unit	0.00613617	0.0231156	5223.59	5198	415.858	-0.208236	-2.85289	R2	W	23.683	29.8191	92.8879	0.000122661	0.000244832
RGU297537N0928862E	RGS297537N0928862E	20100208	Google Earth	Complex	Debris-mantled slope-connected	Geomorphological	Transitional	Extended	Mono-unit	0.0253448	0.214535	5011.34	4817	399.338	-1.22491	-1.45045	R2	W	25.6574	29.7733	92.8943	0.00105608	0.00354798
RGU298191N0928879E	RGS298191N0928879E	20141118	Google Earth	Simple	Talus-connected	Geomorphological	Active	Extended	Mono-unit	0.00810305	0.0292015	4911.88	4862	423.787	-0.246677	-1.98264	R2	NE	20.5903	30.0018	92.9196	0.000176982	0.000324093
RGU297733N0928943E	RGS297733N0928943E	20141118	Google Earth	Simple	Talus-connected	Geomorphological	Active	Extended	Mono-unit	0.00787659	0.038931	5087.02	5004	425.342	-0.54061	-2.31116	R2	N	26.3279	29.9899	92.9283	0.000187098	0.000457654
RGU3018N0929196E	RGS300018N0929196E	20141118	Google Earth	Simple	Talus-connected	Geomorphological	Active	Extended	Mono-unit	0.0114649	0.0653534	4886.95	4810	421.804	-0.443635	-1.83523	R2	N	16.7542	29.9904	92.9346	0.000483226	0.000852126
RGU299899N0929283E	RGS299899N0929283E	20141118	Google Earth	Simple	Talus-connected	Geomorphological	Active	Extended	Mono-unit	0.00458431	0.0134688	4942.76	4928	419.406	-0.54061	-1.62078	R2	NW	20.4921	29.9863	92.9329	8.20052e-05	0.00012805
RGU299904N0929346E	RGS299904N0929346E	20141118	Google Earth	Simple	Talus-connected	Geomorphological	Active	Extended	Mono-unit	0.00665684	0.0262569	4991.44	4952	419.406	-0.54061	-1.62078	R2	N	23.9697	29.9849	92.9307	0.000137759	0.000285282
RGU299863N0929329E	RGS299863N0929329E	20141118	Google Earth	Simple	Talus-connected	Geomorphological	Active	Extended	Mono-unit	0.00604378	0.0222035	5077.68	5047	432.268	-0.54061	-3.05399	R2	N	18.0876	29.9835	92.927	0.000152433	0.000233286
RGU299849N0929307E	RGS299849N0929307E	20141118	Google Earth	Simple	Talus-connected	Geomorphological	Active	Extended	Mono-unit	0.00470306	0.0135743	5143.94	5127	432.268	-0.96407	-3.05399	R2	NE	15.8034	29.983	92.9241	0.00010624	0.000129254
RGU299835N0929270E	RGS299835N0929270E	20141118	Google Earth	Simple	Talus-connected	Geomorphological	Active	Extended	Mono-unit	0.00704662	0.0334967	5039.95	5015	431.275	-0.96407	-2.91629	R2	N	12.2053	29.9866	92.9199	0.000337708	0.000382108
RGU299830N0929241E	RGS299830N0929241E	20091021	Google Earth	Complex	Talus-connected	Geomorphological	Transitional	Extended	Mono-unit	0.00764219	0.0425051	5068.58	5032	414.609	-1.4242	-2.21054	R2	N	14.8559	29.8859	92.9052	0.00035336	0.000508525
RGU299866N0929199E	RGS299866N0929199E	20091021	Google Earth	Complex	Talus-connected	Geomorphological	Active	Extended	Mono-unit	0.0113472	0.0899709	5198.3	5151	414.609	-1.32164	-2.22585	R2	NE	16.9323	29.8833	92.9072	0.000658451	0.00125056
RGU298859N0929052E	RGS298859N0929052E	20091021	Google Earth	Complex	Glacier forefield-connected	Geomorphological	Relict	Extended	Mono-unit	0.0326196	0.380592	5139.62	4994	420.533	-1.29285	-2.58134	R2	W	13.9139	29.8689	92.9289
RGU298833N0929072E	RGS298833N0929072E	20091021	Google Earth	Simple	Glacier forefield-connected	Geomorphological	Active	Extended	Mono-unit	0.0143637	0.0783614	5310.6	5270	431.971	-1.4544	-3.59749	R2	NW	21.531	29.8704	92.939	0.0004551	0.00105951
RGU298689N0929289E	RGS298689N0929289E	20091021	Google Earth	Complex	Talus-connected	Geomorphological	Active	Extended	Mono-unit	0.010359	0.0756921	5111.9	5060	419.958	-1.21828	-2.50546	R2	NE	20.5212	29.8649	92.9306	0.000460226	0.00101635
RGU298704N0929390E	RGS298704N0929390E	20091021	Google Earth	Complex	Talus-connected	Geomorphological	Transitional	Extended	Mono-unit	0.0169537	0.175428	4998.2	4941	421.394	-1.2645	-2.71527	R2	NE	17.0127	29.8733	92.9244	0.00127799	0.00278678
RGU298649N0929306E	RGS298649N0929306E	20091021	Google Earth	Simple	Glacier forefield-connected	Geomorphological	Active	Extended	Mono-unit	0.0120133	0.0761149	5370.58	5312	422.16	-1.8591	-2.79364	R2	N	22.1207	29.8539	92.933	0.000430837	0.00102317
RGU298733N0929244E	RGS298733N0929244E	20091021	Google Earth	Simple	Talus-connected	Geomorphological	Active	Extended	Mono-unit	0.00548781	0.0201444	5355	5323	427.653	-1.8591	-3.5047	R2	NE	20.7812	29.8524	92.9334	0.000121017	0.000207572
RGU298539N0929330E	RGS298539N0929330E	20091021	Google Earth	Simple	Glacier forefield-connected	Geomorphological	Active	Extended	Mono-unit	0.00650444	0.0301935	5277.76	5247	421.824	-1.2092	-2.72689	R2	NE	16.1044	29.857	92.9334	0.000232007	0.000337348
RGU298524N0929334E	RGS298524N0929334E	20091021	Google Earth	Complex	Glacier forefield-connected	Geomorphological	Active	Extended	Mono-unit	0.011583	0.0747833	5275.06	5220	424.434	-1.2092	-3.01615	R2	NE	18.4372	29.8587	92.9312	0.000504	0.00100172
RGU298570N0929334E	RGS298570N0929334E	20091021	Google Earth	Simple	Glacier forefield-connected	Geomorphological	Transitional	Extended	Mono-unit	0.010038	0.0662017	5141.18	5106	421.824	-1.41395	-2.72689	R2	NE	14.6893	29.8597	92.9355	0.000556462	0.000865418
RGU298587N0929312E	RGS298587N0929312E	20091021	Google Earth	Simple	Glacier forefield-connected	Geomorphological	Active	Extended	Mono-unit	0.011181	0.0724846	5226.26	5181	422.521	-1.3472	-2.69673	R2	SE	13.5392	29.879	92.9318	0.000659934	0.00096489
RGU298597N0929355E	RGS298597N0929355E	20091021	Google Earth	Complex	Talus-connected	Geomorphological	Active	Extended	Mono-unit	0.0242586	0.212557	5223.48	5107	420.752	-1.38181	-2.92661	R2	NW	15.7487	29.8576	92.9041	0.00166921	0.00350875
RGU298790N0929318E	RGS298790N0929318E	20091021	Google Earth	Simple	Talus-connected	Geomorphological	Active	Extended	Mono-unit	0.00463322	0.0124662	4996.79	4980	410.848	-0.74623	-1.92262	R2	W	14.6374	29.8604	92.8975	0.000105149	0.000116698
RGU298576N0929041E	RGS298576N0929041E	20091021	Google Earth	Complex	Talus-connected	Geomorphological	Active	Extended	Mono-unit	0.0193539	0.151421	5288.42	5156	401.075	-1.58699	-1.0207	R2	SW	18.0499	29.8442	92.9099	0.00104164	0.00233564
RGU298604N0928975E	RGS298604N0928975E	20091021	Google Earth	Complex	Debris-mantled slope-connected	Geomorphological	Active	Extended	Mono-unit	0.0184541	0.111211	5345.37	5300	410.545	-1.88557	-1.93743	R2	W	12.2651	29.8438	92.9216	0.00111583	0.00161272
RGU298442N0929099E	RGS298442N0929099E	20091021	Google Earth	Simple	Glacier forefield-connected	Geomorphological	Active	Extended	Mono-unit	0.00883094	0.045785	5308.89	5281	423.193	-1.72884	-3.04348	R2	S	21.4664	29.8381	92.9341	0.000266668	0.000555969
RGU298438N0929216E	RGS298438N0929216E	20091021	Google Earth	Complex	Glacier forefield-connected	Geomorphological	Transitional	Extended	Mono-unit	0.0130461	0.0833567	5276.33	5230	422.665	-1.73791	-2.97306	R2	W	10.1798	29.8376	92.9301	0.00100528	0.00114107
RGU298381N0929341E	RGS298381N0929341E	20091021	Google Earth	Complex	Talus-connected	Geomorphological	Active	Extended	Mono-unit	0.0121227	0.0529889	5180.06	5131	398.933	-1.79265	-0.719862	R2	N	22.1562	29.8378	92.9256	0.000299479	0.000662528
RGU298376N0929301E	RGS298376N0929301E	20091021	Google Earth	Complex	Talus-connected	Geomorphological	Active	Extended	Mono-unit	0.0104689	0.047283	5097.33	5041	398.972	-1.91053	-0.738741	R2	W	22.5906	29.8361	92.9195	0.000262353	0.000577868
RGU298378N0929256E	RGS298378N0929256E	20091021	Google Earth	Simple	Debris-mantled slope-connected	Geomorphological	Active	Extended	Mono-unit	0.0119864	0.0652516	4920.43	4832	407.033	-1.9054	-1.6688	R2	SW	24.1587	29.8317	92.9186	0.00033983	0.000850534
RGU298361N0929195E	RGS298361N0929195E	20091021	Google Earth	Complex	Glacier forefield-connected	Geomorphological	Transitional	Extended	Mono-unit	0.00535103	0.0184046	5210.05	5173	425.276	-2.1466	-3.77379	R2	NE	30.0943	29.7703	92.9246	7.82344e-05	0.00018625
RGU298317N0929186E	RGS298317N0929186E	20091021	Google Earth	Complex	Debris-mantled slope-connected	Geomorphological	Relict	Extended	Mono-unit	0.00565088	0.0206906	5099.42	5078	420.223	-2.18985	-3.24111	R2	E	14.6436	29.7746	92.9249
RGU297703N0929246E	RGS297703N0929246E	20091021	Google Earth	Simple	Debris-mantled slope-connected	Geomorphological	Relict	Extended	Mono-unit	0.00601225	0.021859	5127.54	5090	420.223	-2.226	-3.24111	R2	NE	24.3092	29.7776	92.9239
RGU297746N0929249E	RGS297746N0929249E	20091021	Google Earth	Complex	Glacier forefield-connected	Geomorphological	Transitional	Extended	Mono-unit	0.0107879	0.0608048	5135.39	5053	415.875	-1.3856	-2.82921	R2	NE	26.1595	29.7856	92.9216	0.000293969	0.000781462
RGU297776N0929239E	RGS297776N0929239E	20091021	Google Earth	Complex	Glacier forefield-connected	Geomorphological	Active	Extended	Mono-unit	0.0224073	0.193873	5110.93	4965	409.842	-1.31261	-2.08198	R2	E	24.7757	29.799	92.9199	0.000986073	0.00314198
RGU297856N0929216E	RGS297856N0929216E	20091021	Google Earth	Simple	Talus-connected	Geomorphological	Active	Extended	Mono-unit	0.00555482	0.0171296	5067.53	5023	407.32	-1.42773	-1.90187	R2	W	25.5562	29.791	92.9237	8.46346e-05	0.000170876
RGU297990N0929199E	RGS297990N0929199E	20091021	Google Earth	Complex	Talus-connected	Geomorphological	Active	Extended	Mono-unit	0.0199094	0.238552	5056.73	4992	407.601	-1.34834	-1.92472	R2	W	19.3765	29.796	92.9222	0.00153255	0.00402979
RGU297910N0929237E	RGS297910N0929237E	20091021	Google Earth	Simple	Talus-connected	Geomorphological	Transitional	Extended	Mono-unit	0.00888433	0.0557904	5023.63	4961	419.808	-0.29647	-2.9762	R2	SW	23.6632	29.8056	92.9214	0.00029628	0.00070478
RGU297960N0929222E	RGS297960N0929222E	20091021	Google Earth	Simple	Talus-connected	Geomorphological	Transitional	Extended	Mono-unit	0.0110951	0.0604526	5011.97	4944	424.954	-0.29647	-3.4336	R2	W	22.5226	29.8071	92.921	0.000336386	0.000776034
RGU298056N0929214E	RGS298056N0929214E	20091021	Google Earth	Complex	Talus-connected	Geomorphological	Transitional	Extended	Mono-unit	0.0130851	0.11796	4998.49	4947	428.468	-0.628736	-3.78209	R2	W	18.9225	29.8119	92.9203	0.000775318	0.00173088
RGU298071N0929210E	RGS298071N0929210E	20091021	Google Earth	Complex	Talus-connected	Geomorphological	Transitional	Extended	Mono-unit	0.012727	0.101527	4985.37	4940	426.302	-0.67537	-3.48802	R2	W	22.826	29.8156	92.9198	0.000557826	0.0014457
RGU298119N0929203E	RGS298119N0929203E	20100310	Google Earth	Complex	Glacier forefield-connected	Geomorphological	Active	Extended	Mono-unit	0.00737252	0.0414468	5250.31	5219	405.699	-0.664944	-2.59675	R2	NE	9.33999	29.631	92.9328	0.000544338	0.000493369
RGU298156N0929198E	RGS298156N0929198E	20100310	Google Earth	Simple	Glacier forefield-connected	Geomorphological	Active	Extended	Mono-unit	0.00980942	0.0428101	5178.2	5157	404.26	-0.65785	-2.4675	R2	W	17.7286	29.6345	92.9323	0.000299656	0.000512907
RGU296310N0929328E	RGS296310N0929328E	20100310	Google Earth	Simple	Glacier forefield-connected	Geomorphological	Active	Extended	Mono-unit	0.00569968	0.0176895	5238.84	5218	404.295	-0.65785	-2.428	R2	N	13.3839	29.6321	92.9307	0.000162888	0.0001776
RGU296345N0929323E	RGS296345N0929323E	20100310	Google Earth	Complex	Glacier forefield-connected	Geomorphological	Transitional	Extended	Mono-unit	0.00642037	0.0299957	5127.89	5117	399.691	-0.65785	-2.06223	R2	NE	10.9485	29.6354	92.9296	0.000336626	0.000334698
RGU296321N0929307E	RGS296321N0929307E	20100310	Google Earth	Simple	Glacier forefield-connected	Geomorphological	Relict	Extended	Mono-unit	0.0045057	0.0138719	4977.06	4972	397.709	-0.037956	-1.80512	R2	N	11.8804	29.6406	92.9313
RGU296354N0929296E	RGS296354N0929296E	20100310	Google Earth	Simple	Glacier forefield-connected	Geomorphological	Transitional	Extended	Mono-unit	0.00889703	0.0386645	5040.22	4998	397.709	-0.547647	-1.80512	R2	N	19.9036	29.639	92.9316	0.000242075	0.000453897
RGU296406N0929313E	RGS296406N0929313E	20100310	Google Earth	Simple	Glacier forefield-connected	Geomorphological	Active	Extended	Mono-unit	0.00423167	0.0105797	5092.17	5060	397.709	-0.65785	-1.80512	R2	NW	29.3883	29.6376	92.9325	4.59524e-05	9.58403e-05
RGU296390N0929316E	RGS296390N0929316E	20100310	Google Earth	Complex	Talus-connected	Geomorphological	Active	Extended	Mono-unit	0.00512025	0.0193393	5226.39	5196	409.358	-1.4407	-2.92145	R2	W	28.3696	29.6181	92.9335	8.67521e-05	0.000197657
RGU296376N0929325E	RGS296376N0929325E	20100310	Google Earth	Simple	Talus-connected	Geomorphological	Active	Extended	Mono-unit	0.00601731	0.019249	5287.05	5272	410.062	-1.25939	-3.03539	R2	SW	10.8407	29.6212	92.9348	0.000218145	0.00019655
RGU296212N0929348E	RGS296212N0929348E	20201111	Google Earth	Complex	Talus-connected	Geomorphological	Active	Extended	Mono-unit	0.0122766	0.0796728	5167.8	5116	407.677	-1.1799	-3.14475	R2	N	17.0407	29.6174	92.9093	0.000579486	0.00108082
RGU296138N0929327E	RGS296138N0929327E	20201111	Google Earth	Complex	Talus-connected	Geomorphological	Active	Extended	Mono-unit	0.0334215	0.261619	4991.85	4726	393.563	-0.824	-1.8086	R2	NW	19.1675	29.6179	92.8994	0.00169838	0.0045018
RGU296174N0929093E	RGS296174N0929093E	20100208	Google Earth	Complex	Talus-connected	Geomorphological	Relict	Extended	Mono-unit	0.0128744	0.0550905	4976.93	4945	392.807	-0.72648	-1.16253	R2	SE	16.1122	29.6617	92.9393
RGU296179N0928994E	RGS296179N0928994E	20100208	Google Earth	Complex	Talus-connected	Geomorphological	Relict	Extended	Mono-unit	0.00457977	0.0133686	5009.29	4989	397.437	-0.72648	-1.51158	R2	E	21.2564	29.663	92.9388
RGU296617N0929393E	RGS296617N0929393E	20100208	Google Earth	Complex	Talus-connected	Geomorphological	Active	Extended	Mono-unit	0.0269685	0.143434	5105.09	4940	390.9	-0.590967	-0.964369	R2	SE	17.3347	29.6595	92.9359	0.00102608	0.00218859
RGU296630N0929388E	RGS296630N0929388E	20100208	Google Earth	Simple	Talus-connected	Geomorphological	Active	Extended	Mono-unit	0.00628123	0.0266552	4997.65	4967	390.9	-0.72648	-0.964369	R2	E	23.5563	29.6592	92.9384	0.00014216	0.000290483
RGU296595N0929359E	RGS296595N0929359E	20100208	Google Earth	Complex	Talus-connected	Geomorphological	Active	Extended	Mono-unit	0.0206832	0.197775	5159.82	5049	396.188	-0.241722	-1.6013	R2	SE	13.7042	29.6536	92.9298	0.00177936	0.00321802
RGU296592N0929384E	RGS296592N0929384E	20100208	Google Earth	Complex	Talus-connected	Geomorphological	Active	Extended	Mono-unit	0.0341142	0.302369	5043.88	4859	391.971	-0.323961	-1.20451	R2	W	18.2635	29.6633	92.9154	0.00205652	0.00535584
RGU296536N0929298E	RGS296536N0929298E	20100208	Google Earth	Simple	Talus-connected	Geomorphological	Active	Extended	Mono-unit	0.0208164	0.131761	5075.12	4921	393.862	-0.64549	-1.38591	R2	NW	21.2756	29.6718	92.9169	0.000773979	0.00197663
RGU296633N0929154E	RGS296633N0929154E	20100208	Google Earth	Simple	Debris-mantled slope-connected	Geomorphological	Transitional	Extended	Mono-unit	0.00397887	0.0108162	5228.54	5212	399.375	-0.55664	-1.87554	R2	W	24.5902	29.6701	92.9261	5.54022e-05	9.84175e-05
RGU296718N0929169E	RGS296718N0929169E	20100208	Google Earth	Complex	Talus-connected	Geomorphological	Active	Extended	Mono-unit	0.0075626	0.0320927	5240.98	5206	400.48	-0.55664	-1.95245	R2	W	20.0887	29.6722	92.9266	0.000199153	0.00036297
RGU296701N0929261E	RGS296701N0929261E	20100208	Google Earth	Complex	Talus-connected	Geomorphological	Active	Extended	Mono-unit	0.00879026	0.0411646	5303.13	5267	400.807	-0.899733	-1.97991	R2	SW	13.6123	29.6748	92.927	0.000372806	0.00048934
RGU296722N0929266E	RGS296722N0929266E	20100208	Google Earth	Complex	Talus-connected	Geomorphological	Active	Extended	Mono-unit	0.0107	0.0389322	5259.45	5213	400.807	-0.684075	-1.97991	R2	S	17.7001	29.6733	92.9259	0.000272937	0.000457671
RGU296748N0929270E	RGS296748N0929270E	20100208	Google Earth	Complex	Talus-connected	Geomorphological	Active	Extended	Mono-unit	0.00763056	0.022005	5325.58	5303	401.05	-0.55664	-1.80387	R2	SW	24.4013	29.6711	92.9311	0.000113531	0.000230786
RGU296711N0929311E	RGS296711N0929311E	20100208	Google Earth	Simple	Talus-connected	Geomorphological	Active	Extended	Mono-unit	0.0125981	0.0699002	5287.21	5221	398.619	-0.528491	-1.7044	R2	SW	15.5446	29.6647	92.93	0.000555954	0.000923755
RGU296687N0929329E	RGS296820N0929234E	20100208	Google Earth	Complex	Glacier forefield-connected	Geomorphological	Transitional	Extended	Multi-unit	0.0222599	0.155316	5197.1	5038	400.029	-0.901313	-1.83214	R2	W	18.7874	29.6825	92.9224	0.00102792	0.00240792
RGU296647N0929300E	RGS296820N0929234E	20100208	Google Earth	Complex	Glacier forefield-connected	Geomorphological	Transitional	Extended	Multi-unit	0.0111432	0.0591568	5198.23	5130	397.28	-1.02555	-1.59956	R2	SW	15.5725	29.6826	92.9251	0.000469682	0.000756115
RGU296825N0929224E	RGS296825N0929224E	20100208	Google Earth	Complex	Talus-connected	Geomorphological	Relict	Extended	Mono-unit	0.0127839	0.105285	5023.35	4936	397.211	-0.73253	-1.61831	R2	NW	24.2034	29.6804	92.9192
RGU296804N0929192E	RGS296804N0929192E	20100208	Google Earth	Complex	Talus-connected	Geomorphological	Active	Extended	Mono-unit	0.0220698	0.141124	5004.98	4828	395.582	-0.230827	-1.64024	R2	E	21.0529	29.6645	92.9105	0.000837345	0.00214636
RGU296763N0929236E	RGS296763N0929236E	20100208	Google Earth	Complex	Glacier forefield-connected	Geomorphological	Active	Extended	Mono-unit	0.00565096	0.0192433	5173.71	5133	405.455	-0.273046	-2.61791	R2	E	22.6453	29.6771	92.9041	0.000106529	0.00019648
RGU296645N0929105E	RGS296645N0929105E	20100208	Google Earth	Complex	Talus-connected	Geomorphological	Active	Extended	Mono-unit	0.0176422	0.0889114	5114.18	5012	401.956	-0.258559	-2.18513	R2	N	20.5062	29.6762	92.9094	0.000540982	0.00123291
RGU296771N0929041E	RGS296771N0929041E	20100208	Google Earth	Complex	Talus-connected	Geomorphological	Transitional	Extended	Mono-unit	0.00814722	0.0306237	5139	5095	394.164	-0.25639	-1.47434	R2	E	17.5558	29.6805	92.9103	0.000216398	0.000343125
RGU296762N0929094E	RGS296762N0929094E	20100208	Google Earth	Complex	Talus-connected	Geomorphological	Active	Extended	Mono-unit	0.00903965	0.0474327	5194.07	5159	402.974	-0.25639	-2.33768	R2	E	13.0708	29.6823	92.9069	0.000447041	0.000580063
RGU296805N0929103E	RGS296805N0929103E	20100208	Google Earth	Simple	Talus-connected	Geomorphological	Active	Extended	Mono-unit	0.00639637	0.0281534	5267.55	5246	402.974	-0.677697	-2.33768	R2	SE	14.1035	29.6856	92.9051	0.000246261	0.000310184
RGU296823N0929069E	RGS296823N0929069E	20100208	Google Earth	Complex	Talus-connected	Geomorphological	Active	Extended	Mono-unit	0.00746119	0.030543	5268.19	5241	401.413	-0.58934	-2.15888	R2	E	19.4409	29.69	92.9075	0.000195596	0.00034204
RGU296934N0929110E	RGS296934N0929110E	20100208	Google Earth	Complex	Talus-connected	Geomorphological	Active	Extended	Mono-unit	0.00416738	0.0110293	5329.43	5317	402.251	-1.4735	-2.2289	R2	SW	18.6652	29.6937	92.909	7.34555e-05	0.000100749
RGU296937N0929090E	RGS296937N0929090E	20100208	Google Earth	Complex	Talus-connected	Geomorphological	Active	Extended	Mono-unit	0.0087206	0.0526202	5194.74	5157	401.653	-0.58934	-2.12661	R2	E	15.1113	29.6872	92.9089	0.000430226	0.000657
RGU296900N0929094E	RGS296900N0929094E	20100208	Google Earth	Complex	Talus-connected	Geomorphological	Active	Extended	Mono-unit	0.00657571	0.0265617	5186.81	5145	403.382	-1.2882	-2.26848	R2	NE	26.7769	29.6947	92.9166	0.000125667	0.000289261
RGU296872N0929089E	RGS296872N0929089E	20100208	Google Earth	Simple	Talus-connected	Geomorphological	Active	Extended	Mono-unit	0.00517515	0.0179926	5232.5	5195	403.382	-1.2882	-2.26848	R2	E	25.9864	29.6963	92.9156	8.75264e-05	0.000181257
RGU296947N0929166E	RGS296947N0929166E	20100208	Google Earth	Complex	Talus-connected	Geomorphological	Active	Extended	Mono-unit	0.0133139	0.0932425	5213.44	5142	403.215	-1.32205	-2.25444	R2	E	21.486	29.6972	92.9169	0.000542606	0.00130533
RGU296963N0929156E	RGS296963N0929156E	20100208	Google Earth	Simple	Talus-connected	Geomorphological	Active	Extended	Mono-unit	0.0109587	0.0443048	5311.27	5212	400.933	-1.41791	-1.88233	R2	E	26.9877	29.6996	92.9149	0.000208096	0.00053447
RGU296972N0929169E	RGS296972N0929169E	20100208	Google Earth	Complex	Talus-connected	Geomorphological	Active	Extended	Mono-unit	0.00730887	0.0341761	5275.29	5231	406.371	-1.38145	-2.30334	R2	W	26.5229	29.7019	92.925	0.000163126	0.000391426
RGU296996N0929149E	RGS296996N0929149E	20100208	Google Earth	Complex	Glacier forefield-connected	Geomorphological	Active	Extended	Mono-unit	0.0123968	0.0699399	5251.86	5213	409.783	-0.54723	-2.67304	R2	W	15.6487	29.6974	92.9347	0.000552661	0.000924385
RGU297019N0929250E	RGS297019N0929250E	20100208	Google Earth	Complex	Talus-connected	Geomorphological	Active	Extended	Mono-unit	0.00728163	0.0343356	5243.41	5209	410.425	-1.2973	-2.76356	R2	NW	24.1506	29.6906	92.931	0.000178876	0.00039362
RGU296974N0929347E	RGS296974N0929347E	20100208	Google Earth	Complex	Talus-connected	Geomorphological	Active	Extended	Mono-unit	0.00955297	0.0362221	5315.57	5251	413.741	-1.2973	-3.09547	R2	SW	28.0963	29.6876	92.9326	0.000163934	0.000419711
RGU296906N0929310E	RGS296906N0929310E	20100208	Google Earth	Complex	Talus-connected	Geomorphological	Active	Extended	Mono-unit	0.00545014	0.019159	5266.41	5240	413.741	-1.2973	-3.09547	R2	NE	22.6929	29.6873	92.9302	0.000105851	0.000195447
RGU296876N0929326E	RGS296876N0929326E	20100310	Google Earth	Simple	Talus-connected	Geomorphological	Active	Extended	Mono-unit	0.00599196	0.0275269	5051.61	5018	395.709	-0.89666	-2.20169	R2	W	20.6289	29.6242	92.9086	0.000166534	0.000301919
RGU296873N0929302E	RGS296873N0929302E	20100208	Google Earth	Simple	Glacier forefield-connected	Geomorphological	Active	Extended	Mono-unit	0.00671964	0.0275216	5380.32	5339	426.662	-2.51549	-3.94819	R2	SW	21.438	29.7566	92.9232	0.000160498	0.000301849
RGU296242N0929086E	RGS296242N0929086E	20100208	Google Earth	Complex	Talus-connected	Geomorphological	Active	Extended	Mono-unit	0.0109906	0.0504576	5344.13	5307	411.952	-1.85044	-2.65815	R2	NW	20.0216	29.7493	92.9251	0.000314124	0.000624734
RGU297566N0929232E	RGS297566N0929232E	20100208	Google Earth	Simple	Talus-connected	Geomorphological	Active	Extended	Mono-unit	0.00450819	0.014398	5355.65	5326	426.662	-1.9223	-3.94819	R2	W	29.0737	29.7552	92.9233	6.31538e-05	0.000138722
RGU297493N0929251E	RGS297493N0929251E	20100208	Google Earth	Simple	Talus-connected	Geomorphological	Active	Extended	Mono-unit	0.00484055	0.0167419	5358.38	5339	426.662	-1.9223	-3.94819	R2	W	22.4738	29.7539	92.9233	9.33513e-05	0.000166245
RGU297552N0929233E	RGS297552N0929233E	20100208	Google Earth	Simple	Talus-connected	Geomorphological	Active	Extended	Mono-unit	0.00481243	0.0168609	5411.2	5387	411.952	-1.8164	-2.65815	R2	SW	17.9869	29.7512	92.9285	0.00011638	0.000167664
RGU297539N0929233E	RGS297539N0929233E	20100208	Google Earth	Simple	Glacier forefield-connected	Geomorphological	Active	Extended	Mono-unit	0.00391662	0.0118662	5350.5	5331	413.084	-1.89961	-2.65815	R2	SW	16.6083	29.7524	92.9247	8.84879e-05	0.00010999
RGU297512N0929285E	RGS297512N0929285E	20100208	Google Earth	Complex	Glacier forefield-connected	Geomorphological	Active	Extended	Mono-unit	0.0163593	0.129057	5110.99	4962	411.952	-1.57956	-2.65815	R2	SW	20.8473	29.748	92.9114	0.000772957	0.00192806
RGU297524N0929247E	RGS297524N0929247E	20100208	Google Earth	Simple	Glacier forefield-connected	Geomorphological	Active	Extended	Mono-unit	0.00685202	0.027621	5020.3	4953	411.952	-1.18109	-2.65815	R2	SW	29.0824	29.7467	92.9112	0.000121121	0.000303158
RGU297623N0929115E	RGS297623N0929115E	20100208	Google Earth	Complex	Talus-connected	Geomorphological	Active	Extended	Mono-unit	0.0073586	0.0318876	5274.94	5253	413.015	-1.5512	-2.96189	R2	S	10.1136	29.761	92.909	0.000387054	0.000360187
RGU297617N0929094E	RGS297681N0929004E	20100208	Google Earth	Simple	Debris-mantled slope-connected	Geomorphological	Transitional	Extended	Multi-unit	0.0166066	0.0805417	5081.39	4868	390.203	-1.01184	-0.526964	R2	SW	27.2959	29.7683	92.8978	0.000374349	0.00109498
RGU297610N0929090E	RGS297681N0929004E	20100208	Google Earth	Complex	Talus-connected	Geomorphological	Active	Extended	Multi-unit	0.0111751	0.0592102	5244.93	5176	390.443	-1.32489	-0.544448	R2	W	18.231	29.7674	92.9036	0.000403402	0.000756934
RGU297674N0929036E	RGS297681N0929004E	20100208	Google Earth	Complex	Talus-connected	Geomorphological	Active	Extended	Multi-unit	0.0154345	0.0993479	5348.35	5297	411.785	-1.4202	-2.64833	R2	SW	12.2467	29.7686	92.9078	0.000998275	0.00140855
RGU297692N0929066E	RGS297681N0929004E	20100208	Google Earth	Simple	Talus-connected	Geomorphological	Active	Extended	Multi-unit	0.00679109	0.0239541	5422.59	5396	422.894	-1.68924	-3.64768	R2	W	18.9604	29.768	92.9133	0.00015714	0.000255528
RGU297686N0929078E	RGS297686N0929078E	20100208	Google Earth	Complex	Glacier forefield-connected	Geomorphological	Active	Extended	Mono-unit	0.0121333	0.0787935	5285.17	5243	411.419	-1.40981	-2.57469	R2	W	15.6766	29.7293	92.9312	0.000621542	0.00106652
RGU297680N0929133E	RGS297680N0929133E	20100208	Google Earth	Complex	Talus-connected	Geomorphological	Active	Extended	Mono-unit	0.00861484	0.047555	5220.39	5198	400.847	-1.30205	-1.64053	R2	NW	14.4066	29.7287	92.9277	0.000407399	0.000581859
RGU297293N0929312E	RGS297293N0929312E	20100208	Google Earth	Simple	Talus-connected	Geomorphological	Active	Extended	Mono-unit	0.00602432	0.0237065	5296.26	5252	418.627	-1.9657	-3.35021	R2	SW	27.2865	29.717	92.9297	0.00011022	0.000252362
RGU297287N0929277E	RGS297287N0929277E	20100208	Google Earth	Complex	Glacier forefield-connected	Geomorphological	Active	Extended	Mono-unit	0.0178989	0.213476	5070.78	4988	416.235	-1.2435	-3.29455	R2	N	18.0965	29.7175	92.9184	0.00146486	0.00352696
RGU297170N0929297E	RGS297170N0929297E	20100208	Google Earth	Complex	Glacier forefield-connected	Geomorphological	Active	Extended	Mono-unit	0.00631529	0.0268408	5182.35	5165	404.715	-0.61791	-2.24416	R2	NW	11.3042	29.7186	92.9063	0.000291862	0.000292912
RGU297175N0929184E	RGS297175N0929184E	20100208	Google Earth	Complex	Glacier forefield-connected	Geomorphological	Active	Extended	Mono-unit	0.022796	0.189889	5187.89	5033	411.328	-0.831382	-2.87309	R2	NE	18.0278	29.7408	92.9025	0.00130781	0.00306465
RGU297186N0929063E	RGS297186N0929063E	20091021	Google Earth	Complex	Talus-connected	Geomorphological	Transitional	Extended	Mono-unit	0.0109458	0.0698322	5302.42	5263	418.852	-0.306264	-3.11338	R2	N	13.0232	29.811	92.8958	0.000660513	0.000922677
RGU297408N0929025E	RGS297408N0929025E	20100208	Google Earth	Complex	Talus-connected	Geomorphological	Transitional	Extended	Mono-unit	0.0395229	0.345167	5302.6	4943	402.937	-1.18946	-1.71984	R2	W	17.2981	29.7865	92.8899	0.00247428	0.00627795
RGU298110N0928958E	RGS298110N0928958E	20100208	Google Earth	Simple	Debris-mantled slope-connected	Geomorphological	Relict	Extended	Mono-unit	0.0129624	0.0893063	5117.65	5041	417.197	-0.85011	-2.13745	R2	N	20.1374	29.9327	92.9012
RGU297865N0928899E	RGS297865N0928899E	20100208	Google Earth	Complex	Talus-connected	Geomorphological	Relict	Extended	Mono-unit	0.0331733	0.304	5080.96	4963	422.504	-1.64835	-2.66224	R2	N	15.5558	29.9068	92.9199
RGU299327N0929012E	RGS299327N0929012E	20091021	Google Earth	Complex	Glacier forefield-connected	Geomorphological	Relict	Extended	Mono-unit	0.0146579	0.098889	5344.78	5304	431.61	-1.49629	-3.89231	R2	W	10.0616	29.8254	92.939
RGU299068N0929199E	RGS299068N0929199E	20091021	Google Earth	Complex	Glacier forefield-connected	Geomorphological	Relict	Extended	Mono-unit	0.0171512	0.163419	5087.87	4980	419.734	-1.239	-2.85719	R2	NE	19.7448	29.8071	92.9428
RGU298254N0929390E	RGS298254N0929390E	20100208	Google Earth	Complex	Debris-mantled slope-connected	Geomorphological	Active	Extended	Mono-unit	0.00822844	0.0358174	4867.79	4847	393.272	-0.37619	-1.11243	R2	N	17.0977	29.6472	92.9429	0.000259669	0.000414091
RGU298071N0929428E	RGS298071N0929428E	20100310	Google Earth	Complex	Talus-connected	Geomorphological	Active	Extended	Mono-unit	0.0128389	0.0749918	5157.82	5094	405.699	-0.901873	-2.59675	R2	NE	16.4061	29.6297	92.9389	0.000565924	0.00100508
RGU296472N0929429E	RGS296472N0929429E	20100310	Google Earth	Simple	Talus-connected	Geomorphological	Active	Extended	Mono-unit	0.00600367	0.0226934	5348.8	5291	402.384	-1.2979	-2.2785	R2	E	23.858	29.6154	92.9399	0.000119588	0.000239476
RGU296297N0929389E	RGS296297N0929389E	20100208	Google Earth	Complex	Talus-connected	Geomorphological	Transitional	Extended	Mono-unit	0.0145695	0.0971546	5034	4999	400.099	-0.721893	-1.91653	R2	E	17.0897	29.6676	92.9401	0.000704672	0.00137132
RGU296676N0929401E	RGS296676N0929401E	20100208	Google Earth	Simple	Talus-connected	Geomorphological	Active	Extended	Mono-unit	0.0117992	0.069141	5206.51	5138	407.915	-1.3712	-2.48447	R2	E	18.5874	29.6785	92.9415	0.000462338	0.000911728
RGU296710N0929385E	RGS296710N0929385E	20100208	Google Earth	Simple	Debris-mantled slope-connected	Geomorphological	Active	Extended	Mono-unit	0.00588725	0.025305	5428.45	5399	415.751	-1.3765	-3.14613	R2	S	20.7852	29.689	92.9412	0.000151991	0.000272917
RGU296785N0929415E	RGS296785N0929415E	20100208	Google Earth	Simple	Talus-connected	Geomorphological	Active	Extended	Mono-unit	0.00592577	0.0244011	5311.1	5275	397.406	-0.0617152	-2.07571	R2	E	21.7059	29.6926	92.8665	0.000140627	0.000261261
RGU296890N0929412E	RGS296890N0929412E	20100208	Google Earth	Simple	Talus-connected	Geomorphological	Active	Extended	Mono-unit	0.0138983	0.0787791	5163.08	5056	408.727	-0.836076	-2.56379	R2	W	24.8782	29.6708	92.9439	0.000399139	0.00106629
RGU296926N0928665E	RGS296926N0928665E	20100208	Google Earth	Complex	Talus-connected	Geomorphological	Transitional	Extended	Mono-unit	0.0143381	0.135048	5038.29	4994	409.847	-0.724742	-2.67005	R2	W	15.5561	29.665	92.9408	0.00107334	0.00203596
RGU296708N0929439E	RGS296708N0929439E	20100208	Google Earth	Simple	Talus-connected	Geomorphological	Active	Extended	Mono-unit	0.00782136	0.0332887	4992.57	4941	394.143	-0.72648	-1.19566	R2	SW	20.5768	29.6614	92.9404	0.00020188	0.000379262
RGU296650N0929408E	RGS296650N0929408E	20100208	Google Earth	Simple	Talus-connected	Geomorphological	Active	Extended	Mono-unit	0.00812744	0.0396136	4992.83	4936	394.429	-0.72648	-1.19566	R2	W	24.8466	29.6597	92.9408	0.000200944	0.0004673
RGU296614N0929404E	RGS296614N0929404E	20100208	Google Earth	Complex	Talus-connected	Geomorphological	Active	Extended	Mono-unit	0.0119599	0.0889652	5187.82	5109	407.991	-1.65665	-2.23923	R2	NE	23.0252	29.7035	92.9452	0.000484806	0.00123381
RGU296597N0929408E	RGS296597N0929408E	20100208	Google Earth	Complex	Talus-connected	Geomorphological	Active	Extended	Mono-unit	0.0117722	0.0875741	5215.04	5165	408.563	-1.7149	-2.31835	R2	E	19.2194	29.7076	92.9426	0.000567034	0.00121069
RGU297035N0929452E	RGS297035N0929452E	20100208	Google Earth	Complex	Talus-connected	Geomorphological	Active	Extended	Mono-unit	0.0209392	0.15343	5178.76	5053	388.772	0.0204383	-1.1317	R2	E	17.3266	29.6916	92.8712	0.00109809	0.00237288
RGU297076N0929426E	RGS297076N0929426E	20100208	Google Earth	Complex	Glacier forefield-connected	Geomorphological	Active	Extended	Mono-unit	0.0101327	0.0669905	5371.08	5309	417.089	-0.88663	-3.09248	R2	W	19.813	29.7364	92.938	0.000421262	0.000877806
RGU296916N0928712E	RGS296916N0928712E	20181114	Google Earth	Complex	Talus-connected	Geomorphological	Active	Extended	Mono-unit	0.0131151	0.0967781	5259.23	5220	381.403	-0.040702	-3.15245	R2	NW	20.5645	29.5714	92.5949	0.00058725	0.00136494
RGU297364N0929380E	RGS297364N0929380E	20181114	Google Earth	Complex	Talus-connected	Geomorphological	Active	Extended	Mono-unit	0.0124321	0.0744949	5245.5	5209	375.369	-0.29374	-2.70445	R2	W	19.7204	29.5766	92.5968	0.000470562	0.00099709
RGU295022N0928303E	RGS295022N0928303E	20181114	Google Earth	Complex	Talus-connected	Geomorphological	Active	Extended	Mono-unit	0.0145279	0.0934129	5223.82	5198	384.198	-0.29374	-3.42645	R2	NW	12.6368	29.5827	92.5993	0.000910115	0.00130819
RGU295714N0925949E	RGS295714N0925949E	20181114	Google Earth	Complex	Glacier forefield-connected	Geomorphological	Active	Extended	Mono-unit	0.0208612	0.218054	5210.75	5174	389.346	0.452064	-3.78837	R2	NE	9.83585	29.5876	92.6014	0.00272073	0.00361792
RGU295766N0925968E	RGS295766N0925968E	20181114	Google Earth	Complex	Talus-connected	Geomorphological	Active	Extended	Mono-unit	0.0303024	0.31731	5138.21	5041	375.097	0.635456	-2.53561	R2	NW	13.6115	29.594	92.6048	0.00287389	0.00567497
RGU295827N0925993E	RGS296034N0925995E	20181114	Google Earth	Complex	Glacier forefield-connected	Geomorphological	Active	Extended	Multi-unit	0.016962	0.186005	5313.15	5261	378.562	0.640644	-2.71795	R2	N	12.6629	29.6033	92.5997	0.00180856	0.00298959
RGU295876N0926014E	RGS296034N0925995E	20181114	Google Earth	Simple	Glacier forefield-connected	Geomorphological	Active	Extended	Multi-unit	0.00644498	0.031245	5358.2	5322	377.185	0.26003	-2.78237	R2	N	22.6337	29.5988	92.5963	0.000173053	0.000351495
RGU295940N0926048E	RGS295973N0926191E	20181114	Google Earth	Complex	Glacier forefield-connected	Geomorphological	Transitional	Extended	Multi-unit	0.0107413	0.0472504	5180.7	5121	379.979	0.53711	-2.90216	R2	E	14.6541	29.5977	92.6194	0.000398099	0.00057739
RGU296033N0925997E	RGS295973N0926191E	20181114	Google Earth	Complex	Talus-connected	Geomorphological	Active	Extended	Multi-unit	0.0255856	0.123124	5234.18	5134	380.099	0.631515	-2.9055	R2	NW	11.9832	29.5973	92.6205	0.00126397	0.00182219
RGU295988N0925963E	RGS295973N0926191E	20181114	Google Earth	Complex	Glacier forefield-connected	Geomorphological	Active	Extended	Multi-unit	0.0277703	0.238439	5284.53	5195	381.514	0.663561	-3.05004	R2	E	10.7699	29.5937	92.6173	0.00271971	0.0040275
RGU295977N0926194E	RGS295977N0926194E	20181114	Google Earth	Complex	Talus-connected	Geomorphological	Relict	Extended	Mono-unit	0.0179763	0.152933	4967.73	4927	362.807	-0.476522	-1.45923	R2	W	14.5513	29.5651	92.6186
RGU295973N0926205E	RGS295973N0926205E	20181114	Google Earth	Simple	Talus-connected	Geomorphological	Relict	Extended	Mono-unit	0.0047797	0.0151379	4988.61	4972	380.701	-0.52344	-3.06326	R2	W	17.5903	29.5613	92.6168
RGU295937N0926173E	RGS295937N0926173E	20181114	Google Earth	Complex	Talus-connected	Geomorphological	Relict	Extended	Mono-unit	0.0101869	0.0525104	4963.9	4942	380.701	-0.495205	-3.06326	R2	W	11.3378	29.5606	92.6151
RGU295651N0926186E	RGS295651N0926186E	20181114	Google Earth	Complex	Talus-connected	Geomorphological	Relict	Extended	Mono-unit	0.010603	0.0600909	5020.11	4968	380.701	-0.450433	-3.06326	R2	NW	22.7681	29.5557	92.6141
RGU295613N0926168E	RGS295613N0926168E	20181114	Google Earth	Simple	Talus-connected	Geomorphological	Relict	Extended	Mono-unit	0.00846525	0.0383378	4992.54	4954	368.6	-0.42387	-2.06507	R2	W	17.9176	29.5546	92.6122
RGU295606N0926151E	RGS295606N0926151E	20181114	Google Earth	Simple	Talus-connected	Geomorphological	Relict	Extended	Mono-unit	0.00517361	0.0129454	5152.81	5105	378.135	-1.0009	-2.97692	R2	W	24.9265	29.5316	92.6155
RGU295557N0926141E	RGS295557N0926141E	20181114	Google Earth	Simple	Talus-connected	Geomorphological	Relict	Extended	Mono-unit	0.00544061	0.014488	5134.56	5097	378.135	-1.00117	-2.97692	R2	W	23.6142	29.533	92.6154
RGU295546N0926122E	RGS295546N0926122E	20181114	Google Earth	Complex	Talus-connected	Geomorphological	Transitional	Extended	Mono-unit	0.00841126	0.049883	5064.18	5012	369.105	-1.0022	-2.24028	R2	E	27.0781	29.5366	92.6109	0.000233573	0.000616205
RGU295316N0926155E	RGS295316N0926155E	20181114	Google Earth	Complex	Glacier forefield-connected	Geomorphological	Transitional	Extended	Mono-unit	0.0171155	0.115625	5338.45	5271	373.553	0.100168	-2.39827	R2	NE	15.2795	29.5801	92.6153	0.000935188	0.00168983
RGU295330N0926154E	RGS295330N0926154E	20181114	Google Earth	Complex	Talus-connected	Geomorphological	Active	Extended	Mono-unit	0.0130952	0.0584162	5373.23	5327	381.478	-0.19688	-3.21503	R2	E	15.7486	29.572	92.6084	0.000458745	0.00074477
RGU295366N0926109E	RGS295366N0926109E	20181114	Google Earth	Complex	Talus-connected	Geomorphological	Transitional	Extended	Mono-unit	0.0106604	0.0249035	5305.72	5285	363.63	-0.11328	-1.64369	R2	NE	9.65624	29.5628	92.6036	0.000316452	0.000267728
RGU295801N0926153E	RGS295801N0926153E	20181114	Google Earth	Simple	Talus-connected	Geomorphological	Relict	Extended	Mono-unit	0.00785323	0.0158588	5260.74	5228	373.909	-0.46154	-2.48824	R2	NE	19.2774	29.5634	92.6088
RGU295720N0926084E	RGS295720N0926084E	20181114	Google Earth	Complex	Talus-connected	Geomorphological	Active	Extended	Mono-unit	0.0146536	0.0719142	5420.06	5369	377.327	-2.4071	-3.05783	R2	SW	17.4035	29.5044	92.5981	0.000512479	0.000955784
RGU295628N0926036E	RGS295628N0926036E	20181114	Google Earth	Simple	Talus-connected	Geomorphological	Active	Extended	Mono-unit	0.00593484	0.0229854	5393.57	5364	376.309	-2.3158	-2.99208	R2	E	21.3739	29.5035	92.593	0.000134427	0.000243179
RGU295634N0926088E	RGS295634N0926088E	20181114	Google Earth	Simple	Talus-connected	Geomorphological	Active	Extended	Mono-unit	0.00616512	0.0222607	5379.04	5342	376.309	-1.67305	-2.99208	R2	E	22.5192	29.5025	92.5938	0.000123887	0.000234007
RGU295044N0925981E	RGS295044N0925981E	20181114	Google Earth	Simple	Talus-connected	Geomorphological	Active	Extended	Mono-unit	0.00604989	0.0216241	5355.32	5326	376.309	-1.59229	-2.99208	R2	NE	17.2526	29.5015	92.5951	0.000155405	0.000226
RGU295035N0925930E	RGS295035N0925930E	20181114	Google Earth	Complex	Talus-connected	Geomorphological	Active	Extended	Mono-unit	0.013788	0.0618566	5397.34	5307	375.863	-2.36319	-2.89486	R2	SW	23.83	29.5096	92.6087	0.000326328	0.000797712
RGU295025N0925938E	RGS295025N0925938E	20181114	Google Earth	Complex	Talus-connected	Geomorphological	Active	Extended	Mono-unit	0.0245375	0.178104	5358.05	5274	378.895	-2.47485	-3.11839	R2	SW	15.5816	29.506	92.6097	0.00141327	0.00283786
RGU295015N0925951E	RGS295015N0925951E	20181114	Google Earth	Complex	Talus-connected	Geomorphological	Active	Extended	Mono-unit	0.0198443	0.13475	5373.75	5267	379.301	-2.14768	-3.14926	R2	W	16.1974	29.5018	92.6096	0.00102963	0.00203057
RGU295096N0926087E	RGS295096N0926087E	20181114	Google Earth	Complex	Talus-connected	Geomorphological	Active	Extended	Mono-unit	0.00965433	0.0541265	5282.38	5251	374.62	-1.8584	-2.79157	R2	W	11.9586	29.5007	92.6075	0.000556785	0.000679633
RGU295060N0926097E	RGS295060N0926097E	20181114	Google Earth	Complex	Talus-connected	Geomorphological	Active	Extended	Mono-unit	0.0139449	0.0665092	5245.05	5183	361.419	-1.78842	-1.7936	R2	W	14.3478	29.498	92.6048	0.000572061	0.000870242
RGU295018N0926096E	RGS295018N0926096E	20181114	Google Earth	Complex	Talus-connected	Geomorphological	Relict	Extended	Mono-unit	0.0156669	0.121007	5110.05	5064	354.022	-0.319224	-1.19716	R2	E	17.4991	29.4882	92.6053
RGU295007N0926075E	RGS295007N0926075E	20181114	Google Earth	Complex	Talus-connected	Geomorphological	Transitional	Extended	Mono-unit	0.0181019	0.171102	5319	5254	377.044	-0.398269	-3.1366	R2	NE	16.5695	29.4898	92.5977	0.00127884	0.0027045
RGU294980N0926048E	RGS294980N0926048E	20100310	Google Earth	Simple	Talus-connected	Geomorphological	Active	Extended	Mono-unit	0.0069533	0.0266915	5366.6	5334	375.435	-1.2203	-2.39499	R2	SE	24.8782	29.4956	92.6965	0.000135234	0.000290957
RGU294882N0926053E	RGS294882N0926053E	20100310	Google Earth	Complex	Talus-connected	Geomorphological	Transitional	Extended	Mono-unit	0.00726383	0.03245	5390.18	5352	364.078	-1.6826	-1.95288	R2	SW	17.7438	29.4969	92.6162	0.000226951	0.000367824
RGU294956N0926965E	RGS294956N0926965E	20100310	Google Earth	Complex	Talus-connected	Geomorphological	Active	Extended	Mono-unit	0.0233339	0.131971	5369.53	5294	370.391	-1.70845	-2.40798	R2	E	19.8095	29.4992	92.6228	0.000830024	0.00198042
RGU294969N0926162E	RGS294969N0926162E	20100310	Google Earth	Simple	Talus-connected	Geomorphological	Relict	Extended	Mono-unit	0.019102	0.220238	4964	4869	364.821	0.0278138	-1.57301	R2	W	22.5301	29.5762	92.6254
RGU294942N0926160E	RGS294942N0926160E	20100310	Google Earth	Simple	Talus-connected	Geomorphological	Relict	Extended	Mono-unit	0.0086228	0.0432775	4908.7	4871	364.733	-0.395719	-1.55203	R2	W	17.4883	29.5738	92.6244
RGU294992N0926228E	RGS294992N0926228E	20100310	Google Earth	Complex	Debris-mantled slope-connected	Geomorphological	Relict	Extended	Mono-unit	0.0184302	0.100778	4977.38	4859	369.366	0.43397	-1.99174	R2	NW	24.6318	29.5789	92.6274
RGU295762N0926254E	RGS295762N0926254E	20100310	Google Earth	Complex	Talus-connected	Geomorphological	Relict	Extended	Mono-unit	0.0148977	0.0925408	4859.87	4836	366.898	0.615416	-1.73382	R2	W	12.8943	29.5831	92.6284
RGU295738N0926244E	RGS295738N0926244E	20100310	Google Earth	Complex	Glacier forefield-connected	Geomorphological	Active	Extended	Mono-unit	0.0415912	0.363654	5249.51	5056	383.271	-0.045173	-3.06878	R2	NE	13.1989	29.577	92.6439	0.00339467	0.00668357
RGU295789N0926274E	RGS295789N0926274E	20100310	Google Earth	Complex	Talus-connected	Geomorphological	Active	Extended	Mono-unit	0.00708533	0.0231688	5367.83	5326	381.934	-0.0163256	-2.98504	R2	NW	21.8399	29.5578	92.6419	0.000132745	0.000245508
RGU295831N0926284E	RGS295600N0926428E	20100310	Google Earth	Complex	Debris-mantled slope-connected	Geomorphological	Active	Extended	Multi-unit	0.00626913	0.0248267	5378.61	5343	381.934	-0.014598	-2.98504	R2	W	25.808	29.5603	92.6428	0.000121548	0.000266738
RGU295578N0926419E	RGS295578N0926419E	20100310	Google Earth	Complex	Talus-connected	Geomorphological	Active	Extended	Mono-unit	0.0063422	0.015723	5355.31	5335	386.659	-0.014598	-3.44138	R2	NE	26.776	29.5593	92.6394	7.43898e-05	0.000154179
RGU295603N0926428E	RGS295481N0926318E	20100310	Google Earth	Complex	Talus-connected	Geomorphological	Relict	Extended	Multi-unit	0.00517923	0.01931	5173.57	5146	374.3	-0.450323	-2.48882	R2	NE	19.534	29.5483	92.6316
RGU295603N0926449E	RGS295481N0926318E	20100310	Google Earth	Complex	Talus-connected	Geomorphological	Relict	Extended	Multi-unit	0.00856045	0.0366902	5194.42	5144	374.576	-0.40554	-2.48882	R2	NE	17.27	29.5474	92.6326
RGU295593N0926394E	RGS295593N0926394E	20181114	Google Earth	Complex	Talus-connected	Geomorphological	Relict	Extended	Mono-unit	0.0129973	0.116356	5178.18	5107	385.468	-0.50854	-3.46894	R2	NE	23.8014	29.5521	92.6294
RGU295483N0926316E	RGS295483N0926316E	20181114	Google Earth	Simple	Talus-connected	Geomorphological	Relict	Extended	Mono-unit	0.00506878	0.0177963	5164.4	5135	371.776	-0.50854	-2.34689	R2	N	21.4531	29.5547	92.6276
RGU295474N0926326E	RGS295474N0926326E	20181114	Google Earth	Complex	Talus-connected	Geomorphological	Transitional	Extended	Mono-unit	0.0230923	0.208313	5080.61	5019	366.875	-0.401421	-1.7982	R2	E	20.5871	29.5619	92.6273	0.00126272	0.00342485
RGU295521N0926294E	RGS295521N0926294E	20100310	Google Earth	Complex	Talus-connected	Geomorphological	Relict	Extended	Mono-unit	0.00730169	0.0297634	5037.16	5003	364.772	-0.385883	-1.58669	R2	W	21.4092	29.566	92.6274
RGU295547N0926276E	RGS295547N0926276E	20100310	Google Earth	Complex	Talus-connected	Geomorphological	Active	Extended	Mono-unit	0.0139424	0.0970305	5420.57	5368	384.349	-1.7189	-3.50748	R2	W	17.3672	29.5055	92.6311	0.000692863	0.00136922
RGU295619N0926273E	RGS295619N0926273E	20100310	Google Earth	Complex	Talus-connected	Geomorphological	Transitional	Extended	Mono-unit	0.0118766	0.077682	5250.95	5183	365.663	-1.0258	-1.99396	R2	W	24.3856	29.499	92.6275	0.00040103	0.0010485
RGU295660N0926274E	RGS295660N0926274E	20100310	Google Earth	Simple	Talus-connected	Geomorphological	Transitional	Extended	Mono-unit	0.00576207	0.0212351	5221.52	5181	364.288	-1.0258	-1.90671	R2	SW	22.0122	29.4955	92.6283	0.00012076	0.00022113
RGU295055N0926311E	RGS295055N0926311E	20100310	Google Earth	Simple	Talus-connected	Geomorphological	Active	Extended	Mono-unit	0.0272553	0.156148	5321.9	5177	363.581	-1.32034	-1.75046	R2	E	18.8559	29.4939	92.6391	0.0010298	0.0024234
RGU294990N0926275E	RGS294990N0926275E	20100310	Google Earth	Complex	Glacier forefield-connected	Geomorphological	Active	Extended	Mono-unit	0.0161093	0.145362	5199.68	5145	362.105	-1.5003	-1.68016	R2	N	14.43	29.4882	92.6368	0.00124332	0.00222395
RGU294955N0926283E	RGS294955N0926283E	20100310	Google Earth	Complex	Talus-connected	Geomorphological	Active	Extended	Mono-unit	0.023478	0.264164	5135.37	5067	359.009	-1.65322	-1.46585	R2	NW	16.5178	29.4851	92.6297	0.0019804	0.00455439
RGU294939N0926391E	RGS294939N0926391E	20100310	Google Earth	Complex	Glacier forefield-connected	Geomorphological	Transitional	Extended	Mono-unit	0.0196826	0.165496	5233.07	5114	376.296	-1.6324	-2.95849	R2	NE	16.7028	29.4741	92.6283	0.00122734	0.00259854
RGU294882N0926368E	RGS294882N0926368E	20100310	Google Earth	Simple	Glacier forefield-connected	Geomorphological	Transitional	Extended	Mono-unit	0.00963828	0.0473479	5215.02	5141	370.123	-1.03058	-2.16172	R2	SE	22.9678	29.5144	92.6471	0.000258627	0.00057882
RGU294851N0926297E	RGS294851N0926297E	20100310	Google Earth	Complex	Talus-connected	Geomorphological	Active	Extended	Mono-unit	0.0201168	0.245341	4948.66	4889	363.864	-1.0068	-1.60742	R2	NE	15.8867	29.5004	92.6669	0.00191036	0.00416781
RGU294741N0926283E	RGS294741N0926283E	20100310	Google Earth	Complex	Talus-connected	Geomorphological	Active	Extended	Mono-unit	0.0212162	0.17316	5120.85	4928	378.032	-1.15516	-2.79596	R2	NE	26.1207	29.5047	92.6613	0.000838323	0.0027436
RGU295098N0926617E	RGS295098N0926617E	20100310	Google Earth	Simple	Glacier forefield-connected	Geomorphological	Active	Extended	Mono-unit	0.00560472	0.0169924	5207.95	5172	370.123	-0.80986	-2.20792	R2	SE	22.6051	29.5166	92.6489	9.42267e-05	0.000169234
RGU295095N0926624E	RGS295095N0926624E	20100310	Google Earth	Simple	Glacier forefield-connected	Geomorphological	Active	Extended	Mono-unit	0.00842573	0.032303	5245.03	5209	365.913	-1.14198	-1.67327	R2	NW	20.3437	29.5146	92.6666	0.00019805	0.000365825
RGU295087N0926627E	RGS295087N0926627E	20100310	Google Earth	Complex	Glacier forefield-connected	Geomorphological	Active	Extended	Mono-unit	0.0163702	0.0860343	5187.5	5062	369.681	-1.10914	-2.16377	R2	NE	23.6459	29.4945	92.6567	0.000457209	0.00118519
RGU295166N0926489E	RGS295166N0926489E	20100310	Google Earth	Complex	Glacier forefield-connected	Geomorphological	Active	Extended	Mono-unit	0.0157907	0.085293	5158.61	5058	371.771	-1.1773	-2.26431	R2	NE	20.6239	29.4931	92.6584	0.000516131	0.00117295
RGU295146N0926666E	RGS295146N0926666E	20100310	Google Earth	Complex	Glacier forefield-connected	Geomorphological	Active	Extended	Mono-unit	0.0148447	0.117336	5047.39	4993	377.829	-0.92689	-2.66894	R2	N	13.4745	29.491	92.6629	0.00107332	0.00171989
RGU294945N0926567E	RGS294945N0926567E	20100310	Google Earth	Complex	Glacier forefield-connected	Geomorphological	Active	Extended	Mono-unit	0.029596	0.455481	4984.29	4847	386.75	-0.670652	-3.49739	R2	NE	14.7891	29.4909	92.6702	0.00380331	0.00875683
RGU294931N0926584E	RGS294931N0926584E	20100310	Google Earth	Simple	Glacier forefield-connected	Geomorphological	Active	Extended	Mono-unit	0.0140909	0.0763401	5284.79	5263	383.815	-1.8162	-3.40211	R2	N	12.0983	29.4832	92.6417	0.000776355	0.0010268
RGU294910N0926629E	RGS294910N0926629E	20100310	Google Earth	Complex	Glacier forefield-connected	Geomorphological	Active	Extended	Mono-unit	0.0244787	0.224096	5171.58	5055	373.962	-0.358341	-2.2761	R2	W	23.7834	29.5385	92.6612	0.00118442	0.00373856
RGU294909N0926702E	RGS294909N0926702E	20100310	Google Earth	Simple	Glacier forefield-connected	Geomorphological	Active	Extended	Mono-unit	0.00607864	0.0262546	5130.86	5101	390.675	-0.3525	-3.77518	R2	NE	24.3989	29.5355	92.659	0.000135469	0.000285252
RGU294832N0926417E	RGS294832N0926417E	20100310	Google Earth	Simple	Glacier forefield-connected	Geomorphological	Active	Extended	Mono-unit	0.00936736	0.0542724	5106.16	5063	371.656	-0.385666	-2.14288	R2	E	22.5147	29.5387	92.6582	0.000302097	0.000681831
RGU295385N0926612E	RGS295385N0926612E	20100310	Google Earth	Complex	Talus-connected	Geomorphological	Active	Extended	Mono-unit	0.00428722	0.0122935	5322.93	5300	383.735	-0.11535	-3.13339	R2	NE	25.2044	29.543	92.6683	6.15311e-05	0.00011476
RGU295355N0926590E	RGS295355N0926590E	20100310	Google Earth	Simple	Talus-connected	Geomorphological	Relict	Extended	Mono-unit	0.0057581	0.0241496	5039.76	5000	366.396	-0.4118	-1.57799	R2	W	18.7987	29.558	92.6623
RGU295387N0926582E	RGS295387N0926582E	20100310	Google Earth	Simple	Talus-connected	Geomorphological	Relict	Extended	Mono-unit	0.00411884	0.0127284	5009.75	4991	365.204	-0.48312	-1.53781	R2	W	16.5058	29.556	92.6614
RGU295430N0926683E	RGS295430N0926683E	20100310	Google Earth	Simple	Talus-connected	Geomorphological	Relict	Extended	Mono-unit	0.00426547	0.01257	5113.6	5079	368.617	-0.48312	-1.80237	R2	W	30.4676	29.5504	92.6628
RGU295580N0926623E	RGS295580N0926623E	20100310	Google Earth	Complex	Talus-connected	Geomorphological	Transitional	Extended	Mono-unit	0.0121803	0.0425455	5221.49	5148	368.617	-0.43375	-1.80237	R2	W	16.0919	29.5476	92.6642	0.000327167	0.000509105
RGU295560N0926614E	RGS295560N0926614E	20100310	Google Earth	Simple	Talus-connected	Geomorphological	Transitional	Extended	Mono-unit	0.00389498	0.0113097	5085.46	5072	375.107	-0.59295	-2.60004	R2	W	19.45	29.5436	92.6609	7.23946e-05	0.000103831
RGU295504N0926628E	RGS295504N0926628E	20100310	Google Earth	Complex	Talus-connected	Geomorphological	Relict	Extended	Mono-unit	0.00705553	0.0334919	5079.38	5042	376.88	-0.59295	-2.65021	R2	W	21.0864	29.5421	92.6607
RGU295476N0926642E	RGS295476N0926642E	20100310	Google Earth	Complex	Glacier forefield-connected	Geomorphological	Active	Extended	Mono-unit	0.0124442	0.0581764	5298.29	5242	381.282	-0.29413	-2.91743	R2	NE	15.0428	29.5544	92.6505	0.00047777	0.000741104
RGU295436N0926609E	RGS295436N0926609E	20100310	Google Earth	Complex	Debris-mantled slope-connected	Geomorphological	Active	Extended	Mono-unit	0.0150749	0.120473	5263.87	5132	358.058	-0.207383	-0.796161	R2	SW	23.2449	29.5972	92.6451	0.000650636	0.0017752
RGU295421N0926607E	RGS295421N0926607E	20100310	Google Earth	Complex	Talus-connected	Geomorphological	Active	Extended	Mono-unit	0.0298701	0.178551	5269.56	5195	363.828	-0.595515	-1.11957	R2	NW	11.0825	29.5967	92.6624	0.00197987	0.00284641
RGU295544N0926505E	RGS295544N0926505E	20100310	Google Earth	Complex	Debris-mantled slope-connected	Geomorphological	Transitional	Extended	Mono-unit	0.0183457	0.104462	5224.95	5132	371.641	-0.63626	-1.84232	R2	S	15.0435	29.5953	92.6581	0.000857847	0.00149601
RGU295972N0926451E	RGS295972N0926451E	20100310	Google Earth	Complex	Talus-connected	Geomorphological	Transitional	Extended	Mono-unit	0.00671952	0.0282415	5135.5	5110	377.28	-0.161581	-2.39124	R2	SW	15.1154	29.5929	92.6571	0.000230843	0.000311349
RGU295967N0926624E	RGS295967N0926624E	20100310	Google Earth	Complex	Talus-connected	Geomorphological	Active	Extended	Mono-unit	0.00723923	0.0208591	5451.48	5442	386.137	-0.968482	-3.5257	R2	SW	11.8625	29.4753	92.6644	0.000216285	0.00021644
RGU295953N0926581E	RGS295953N0926581E	20100310	Google Earth	Simple	Talus-connected	Geomorphological	Transitional	Extended	Mono-unit	0.004954	0.0167329	4961.62	4927	363.169	-0.79821	-1.53295	R2	SW	23.9981	29.5013	92.6688	8.76933e-05	0.000166137
RGU295929N0926571E	RGS295929N0926571E	20100310	Google Earth	Simple	Glacier forefield-connected	Geomorphological	Active	Extended	Mono-unit	0.0181238	0.115668	5060.38	4909	354.981	-0.815298	-0.779849	R2	W	18.6748	29.4955	92.6719	0.000769966	0.00169059
RGU294753N0926644E	RGS294753N0926644E	20100310	Google Earth	Simple	Talus-connected	Geomorphological	Active	Extended	Mono-unit	0.00660959	0.0320331	5434.51	5401	379.157	-0.89232	-2.70817	R2	SE	23.3158	29.5105	92.6813	0.000172505	0.00036216
RGU295013N0926688E	RGS295013N0926688E	20100310	Google Earth	Complex	Talus-connected	Geomorphological	Active	Extended	Mono-unit	0.00526355	0.0181898	5379.18	5357	385.001	-0.89232	-3.07509	R2	SW	23.1742	29.5092	92.6829	9.85211e-05	0.000183644
RGU294955N0926719E	RGS294955N0926719E	20100310	Google Earth	Complex	Talus-connected	Geomorphological	Active	Extended	Mono-unit	0.0100142	0.0617307	5337.97	5290	372.997	-0.89232	-2.24227	R2	SW	18.3956	29.5056	92.6839	0.000416939	0.000795763
RGU295105N0926813E	RGS295105N0926813E	20100310	Google Earth	Simple	Talus-connected	Geomorphological	Active	Extended	Mono-unit	0.0087101	0.0347249	5370.46	5313	372.997	-0.90601	-2.24227	R2	SW	19.7275	29.5053	92.6853	0.000219272	0.000398981
RGU295092N0926829E	RGS295092N0926829E	20100310	Google Earth	Complex	Talus-connected	Geomorphological	Active	Extended	Mono-unit	0.0134065	0.100128	5320	5256	372.997	-0.933049	-2.24227	R2	W	20.6247	29.503	92.6835	0.000605882	0.00142184
RGU295056N0926839E	RGS295056N0926839E	20100310	Google Earth	Complex	Talus-connected	Geomorphological	Active	Extended	Mono-unit	0.0119162	0.0442887	5308.36	5206	362.691	-0.9955	-1.35193	R2	W	24.1739	29.4998	92.6807	0.000230519	0.000534237
RGU295053N0926853E	RGS295053N0926853E	20100310	Google Earth	Complex	Glacier forefield-connected	Geomorphological	Active	Extended	Mono-unit	0.00793603	0.036226	5404.39	5384	377.948	-1.1795	-2.63929	R2	W	14.9861	29.514	92.6736	0.000298603	0.000419765
RGU295030N0926835E	RGS295030N0926835E	20100310	Google Earth	Complex	Glacier forefield-connected	Geomorphological	Active	Extended	Mono-unit	0.0130206	0.072169	5353.29	5305	369.248	-1.1795	-1.91477	R2	NW	14.5032	29.5129	92.6705	0.000614233	0.00095985
RGU294998N0926807E	RGS294998N0926807E	20100310	Google Earth	Complex	Talus-connected	Geomorphological	Active	Extended	Mono-unit	0.00885718	0.0459216	5257.15	5207	386.924	-1.1795	-3.3674	R2	NW	28.1082	29.5196	92.6728	0.000207751	0.000557959
RGU295140N0926736E	RGS295140N0926736E	20100310	Google Earth	Complex	Glacier forefield-connected	Geomorphological	Active	Extended	Mono-unit	0.0152032	0.118906	5236.7	5217	387.191	-1.19828	-3.39472	R2	SW	7.99903	29.5219	92.6778	0.00182128	0.00174754
RGU295129N0926705E	RGS295129N0926705E	20100310	Google Earth	Simple	Talus-connected	Geomorphological	Active	Extended	Mono-unit	0.00920435	0.0607783	5249.33	5222	378.814	-0.250511	-2.60831	R2	W	16.1112	29.5306	92.6878	0.00046683	0.000781053
RGU295196N0926728E	RGS295196N0926728E	20100310	Google Earth	Complex	Talus-connected	Geomorphological	Active	Extended	Mono-unit	0.00537708	0.0225719	5330.21	5297	384.95	0.190407	-3.05825	R2	NW	20.71	29.5299	92.6998	0.000136046	0.000237939
RGU295219N0926778E	RGS295219N0926778E	20100310	Google Earth	Complex	Talus-connected	Geomorphological	Active	Extended	Mono-unit	0.00486469	0.0164287	5338.7	5309	379.805	-1.2203	-2.74458	R2	NE	24.4241	29.5006	92.6957	8.46871e-05	0.00016252
[truncated: 3,410 more rows]
