# Supplementary material for: Assessment of rock glaciers, water storage, and permafrost distribution in Guokalariju, Tibetan Plateau
Source: Copernicus journal article supplement (doi:10.5194/tc-2022-178), 2022-10-10
Supplement: Supplementary file 3 [file WVEQ-GKLRJ.xlsx]

## Sheet: Cicoira et al., 2021
Primary_ID	Associated	Activity	Region	Area (km3)	Thickness(m) H			WVEQ(km3) - H			Thickness(m) H-3.4			WVEQ(km3) H-3.4m			Thickness(m) H+3.4			WVEQ(km3) H+3.4m
					40 percent	50 percent	60 percent	40 percent	50 percent	60 percent	40 percent	50 percent	60 percent	40 percent	50 percent	60 percent	40 percent	50 percent	60 percent	40 percent	50 percent	60 percent
RGU294910N0913997E	RGS294910N0913997E	Active	Western	0.0154619	11.8206	12.9928	14.4231	6.57964e-05	9.04017e-05	0.000120424	8.42056	9.5928	11.0231	4.68711e-05	6.67451e-05	9.20365e-05	15.2206	16.3928	17.8231	8.47217e-05	0.000114058	0.000148812
RGU295001N0914050E	RGS295001N0914050E	Transitional	Western	0.0107779	10.4505	11.4869	12.7515	4.05485e-05	5.57121e-05	7.42143e-05	7.05054	8.08691	9.35146	2.73564e-05	3.92219e-05	5.44261e-05	13.8505	14.8869	16.1515	5.37407e-05	7.22023e-05	9.40025e-05
RGU294715N0914127E	RGS294715N0914127E	Active	Western	0.0264529	12.1453	13.3497	14.8193	0.00011566	0.000158912	0.000211687	8.74528	9.94972	11.4193	8.32816e-05	0.000118439	0.00016312	15.5453	16.7497	18.2193	0.000148038	0.000199385	0.000260255
RGU295504N0914943E	RGS295504N0914943E	Active	Western	0.0159968	12.0889	13.2877	14.7505	6.9618e-05	9.56525e-05	0.000127419	8.6889	9.88774	11.3505	5.0038e-05	7.11774e-05	9.80489e-05	15.4889	16.6877	18.1505	8.91981e-05	0.000120128	0.000156789
RGU296382N0915725E	RGS296382N0915725E	Transitional	Western	0.0119991	9.04983	9.94729	11.0424	3.90925e-05	5.37116e-05	7.15494e-05	5.64983	6.54729	7.64235	2.44055e-05	3.53529e-05	4.95189e-05	12.4498	13.3473	14.4424	5.37794e-05	7.20703e-05	9.35798e-05
RGU296434N0915678E	RGS296434N0915678E	Active	Western	0.0237327	13.2952	14.6136	16.2224	0.000113591	0.000156069	0.000207901	9.89516	11.2136	12.8224	8.4542e-05	0.000119758	0.000164327	16.6952	18.0136	19.6224	0.00014264	0.00019238	0.000251474
RGU294748N0915768E	RGS294748N0915768E	Active	Western	0.0119208	14.5859	16.0324	17.7973	6.2595e-05	8.60031e-05	0.000114565	11.1859	12.6324	14.3973	4.8004e-05	6.77643e-05	9.26785e-05	17.9859	19.4324	21.1973	7.7186e-05	0.000104242	0.000136451
RGU296621N0915870E	RGS296621N0915870E	Active	Western	0.0117144	11.4946	12.6345	14.0254	4.84748e-05	6.66025e-05	8.87214e-05	8.09459	9.2345	10.6254	3.41364e-05	4.86795e-05	6.72138e-05	14.8946	16.0345	17.4254	6.28132e-05	8.45255e-05	0.000110229
RGU295337N0915908E	RGS295337N0915908E	Active	Western	0.0223283	12.1079	13.3086	14.7737	9.73253e-05	0.000133721	0.00017813	8.70786	9.90858	11.3737	6.99954e-05	9.95588e-05	0.000137136	15.5079	16.7086	18.1737	0.000124655	0.000167883	0.000219125
RGU294662N0915974E	RGS294662N0915974E	Transitional	Western	0.0941051	12.4124	13.6434	15.1453	0.000420507	0.00057776	0.000769636	9.01244	10.2434	11.7453	0.000305322	0.000433779	0.000596859	15.8124	17.0434	18.5453	0.000535691	0.00072174	0.000942413
RGU295806N0916254E	RGS295806N0916254E	Active	Western	0.0511218	17.0103	18.6972	20.7556	0.000313056	0.000430126	0.000572973	13.6103	15.2972	17.3556	0.000250483	0.00035191	0.000479113	20.4103	22.0972	24.1556	0.000375629	0.000508343	0.000666833
RGU295754N0916504E	RGS295754N0916504E	Transitional	Western	0.035892	12.5318	13.7745	15.2909	0.000161925	0.000222478	0.000296364	9.13178	10.3745	11.8909	0.000117993	0.000167563	0.000230466	15.9318	17.1745	18.6909	0.000205856	0.000277393	0.000362261
RGU294440N0916734E	RGS294440N0916734E	Active	Western	0.0106462	24.3902	26.809	29.7603	9.34786e-05	0.000128436	0.00017109	20.9902	23.409	26.3603	8.04477e-05	0.000112147	0.000151544	27.7902	30.209	33.1603	0.00010651	0.000144725	0.000190636
RGU295647N0916802E	RGS295647N0916802E	Active	Western	0.0167803	12.9816	14.269	15.8398	7.84205e-05	0.000107747	0.00014353	9.58161	10.869	12.4398	5.78815e-05	8.2073e-05	0.000112721	16.3816	17.669	19.2398	9.89596e-05	0.000133421	0.000174338
RGU294340N0916849E	RGS294340N0916849E	Active	Western	0.0133219	11.0721	12.1702	13.5099	5.31008e-05	7.29584e-05	9.71882e-05	7.67214	8.77016	10.1099	3.67948e-05	5.25759e-05	7.27291e-05	14.4721	15.5702	16.9099	6.94068e-05	9.3341e-05	0.000121647
RGU294215N0917529E	RGS294215N0917529E	Active	Western	0.0106464	12.4833	13.7213	15.2318	4.7845e-05	6.57372e-05	8.75687e-05	9.08335	10.3213	11.8318	3.48138e-05	4.94482e-05	6.80219e-05	15.8833	17.1213	18.6318	6.08762e-05	8.20262e-05	0.000107116
RGU294248N0917554E	RGS294248N0917554E	Active	Western	0.0226928	10.256	11.2731	12.5141	8.37857e-05	0.000115118	0.000153349	6.85604	7.87313	9.11414	5.60098e-05	8.03984e-05	0.000111686	13.656	14.6731	15.9141	0.000111562	0.000149838	0.000195013
RGU293825N0917559E	RGS293825N0917559E	Transitional	Western	0.0144713	14.8117	16.2806	18.0729	7.71643e-05	0.000106021	0.000141231	11.4117	12.8806	14.6729	5.94514e-05	8.38796e-05	0.000114661	18.2117	19.6806	21.4729	9.48771e-05	0.000128162	0.0001678
RGU294286N0917602E	RGS294286N0917602E	Active	Western	0.0103083	13.0932	14.3916	15.9759	4.85887e-05	6.6759e-05	8.89299e-05	9.69319	10.9916	12.5759	3.59714e-05	5.09873e-05	7.00039e-05	16.4932	17.7916	19.3759	6.12061e-05	8.25307e-05	0.000107856
RGU294604N0917649E	RGS294604N0917649E	Transitional	Western	0.0264884	14.0665	15.4614	17.1635	0.000134135	0.000184297	0.000245502	10.6665	12.0614	13.7635	0.000101713	0.000143769	0.000196869	17.4665	18.8614	20.5635	0.000166557	0.000224824	0.000294135
RGU295191N0917757E	RGS295191N0917757E	Transitional	Western	0.0112944	9.61605	10.5697	11.7332	3.90987e-05	5.372e-05	7.15607e-05	6.21605	7.16967	8.33324	2.52743e-05	3.64396e-05	5.08242e-05	13.0161	13.9697	15.1332	5.2923e-05	7.10005e-05	9.22971e-05
RGU294312N0917897E	RGS294312N0917897E	Active	Western	0.0183193	10.8328	11.9071	13.2179	7.14419e-05	9.81584e-05	0.000130757	7.43284	8.50712	9.81793	4.90191e-05	7.01299e-05	9.7123e-05	14.2328	15.3071	16.6179	9.38647e-05	0.000126187	0.000164391
RGU295407N0918350E	RGS295407N0918350E	Active	Western	0.0101585	11.5364	12.6804	14.0764	4.21891e-05	5.79661e-05	7.72169e-05	8.13638	9.28043	10.6764	2.97551e-05	4.24237e-05	5.8566e-05	14.9364	16.0804	17.4764	5.4623e-05	7.35086e-05	9.58678e-05
RGU296251N0918659E	RGS296251N0918659E	Transitional	Western	0.0113049	11.3331	12.457	13.8284	4.61232e-05	6.33715e-05	8.44174e-05	7.93312	9.05701	10.4284	3.2286e-05	4.6075e-05	6.36615e-05	14.7331	15.857	17.2284	5.99604e-05	8.0668e-05	0.000105173
RGU294897N0919412E	RGS294897N0919412E	Active	Western	0.0179391	8.50657	9.35015	10.3795	5.49359e-05	7.54798e-05	0.000100547	5.10657	5.95015	6.97948	3.29785e-05	4.80331e-05	6.76108e-05	11.9066	12.7502	13.7795	7.68933e-05	0.000102927	0.000133483
RGU296550N0919458E	RGS296550N0919458E	Transitional	Western	0.0166687	15.9107	17.4886	19.4138	9.5476e-05	0.00013118	0.000174746	12.5107	14.0886	16.0138	7.50735e-05	0.000105677	0.000144142	19.3107	20.8886	22.8138	0.000115879	0.000156684	0.00020535
RGU293674N0919605E	RGS293674N0919605E	Transitional	Western	0.017296	11.0562	12.1526	13.4904	6.88419e-05	9.45861e-05	0.000125998	7.65616	8.75259	10.0904	4.76716e-05	6.81232e-05	9.42429e-05	14.4562	15.5526	16.8904	9.00122e-05	0.000121049	0.000157754
RGU293412N0919636E	RGS293412N0919636E	Active	Western	0.0117242	9.34875	10.2759	11.4071	3.94585e-05	5.42144e-05	7.22192e-05	5.94875	6.87586	8.00709	2.5108e-05	3.62763e-05	5.06935e-05	12.7488	13.6759	14.8071	5.38089e-05	7.21525e-05	9.37448e-05
RGU296490N0919651E	RGS296490N0919651E	Transitional	Western	0.0131464	14.3881	15.8149	17.5559	6.80944e-05	9.35591e-05	0.00012463	10.9881	12.4149	14.1559	5.20032e-05	7.34451e-05	0.000100494	17.7881	19.2149	20.9559	8.41856e-05	0.000113673	0.000148767
RGU296455N0919566E	RGS296455N0919566E	Active	Western	0.010359	11.3784	12.5068	13.8837	4.24331e-05	5.83014e-05	7.76635e-05	7.97845	9.10684	10.4837	2.97536e-05	4.24521e-05	5.86443e-05	14.7784	15.9068	17.2837	5.51126e-05	7.41508e-05	9.66827e-05
RGU295068N0919666E	RGS295068N0919666E	Active	Western	0.0146514	13.081	14.3782	15.961	6.89956e-05	9.47972e-05	0.00012628	9.68098	10.9782	12.561	5.10623e-05	7.23806e-05	9.93798e-05	16.481	17.7782	19.361	8.69288e-05	0.000117214	0.00015318
RGU294735N0919868E	RGS294735N0919868E	Active	Western	0.0109952	17.9403	19.7194	21.8902	7.10126e-05	9.75686e-05	0.000129971	14.5403	16.3194	18.4902	5.75545e-05	8.07459e-05	0.000109784	21.3403	23.1194	25.2902	8.44708e-05	0.000114391	0.000150159
RGU295160N0919721E	RGS295160N0919721E	Active	Western	0.0142383	15.2125	16.7211	18.5619	7.79757e-05	0.000107136	0.000142716	11.8125	13.3211	15.1619	6.05481e-05	8.53511e-05	0.000116574	18.6125	20.1211	21.9619	9.54034e-05	0.00012892	0.000168857
RGU295968N0919932E	RGS295968N0919932E	Active	Western	0.108372	17.0557	18.7471	20.8109	0.00066541	0.000914247	0.00121787	13.6557	15.3471	17.4109	0.000532763	0.000748438	0.0010189	20.4557	22.1471	24.2109	0.000798057	0.00108006	0.00141684
RGU296349N0919913E	RGS296349N0919913E	Active	Western	0.0622054	13.9356	15.3175	17.0038	0.000312072	0.000428775	0.000571173	10.5356	11.9175	13.6038	0.000235933	0.000333601	0.000456964	17.3356	18.7175	20.4038	0.000388212	0.000523949	0.000685382
RGU295585N0919961E	RGS295585N0919961E	Active	Western	0.0132798	14.5547	15.9981	17.7592	6.95821e-05	9.56031e-05	0.000127353	11.1547	12.5981	14.3592	5.33276e-05	7.5285e-05	0.000102972	17.9547	19.3981	21.1592	8.58366e-05	0.000115921	0.000151735
RGU295818N0919982E	RGS295818N0919982E	Active	Western	0.0122756	10.1438	11.1498	12.3772	4.4828e-05	6.15919e-05	8.20468e-05	6.74384	7.74979	8.97723	2.98026e-05	4.28102e-05	5.95087e-05	13.5438	14.5498	15.7772	5.98534e-05	8.03736e-05	0.000104585
RGU295571N0920050E	RGS295571N0920050E	Active	Western	0.016006	13.5636	14.9087	16.55	7.81559e-05	0.000107383	0.000143046	10.1636	11.5087	13.15	5.85646e-05	8.2894e-05	0.000113658	16.9636	18.3087	19.95	9.77473e-05	0.000131872	0.000172433
RGU296306N0920108E	RGS296306N0920108E	Active	Western	0.0110354	19.7823	21.7441	24.1378	7.85898e-05	0.000107979	0.00014384	16.3823	18.3441	20.7378	6.50825e-05	9.10952e-05	0.000123579	23.1823	25.1441	27.5378	9.20971e-05	0.000124863	0.000164101
RGU296684N0920252E	RGS296684N0920252E	Transitional	Western	0.162876	11.5949	12.7447	14.1477	0.000679869	0.000934114	0.00124434	8.19486	9.34471	10.7477	0.000480509	0.000684913	0.000945296	14.9949	16.1447	17.5477	0.00087923	0.00118331	0.00154338
RGU296239N0920300E	RGS296239N0920300E	Active	Western	0.0240947	18.8864	20.7594	23.0447	0.000163823	0.000225086	0.000299838	15.4864	17.3594	19.6447	0.000134331	0.000188221	0.0002556	22.2864	24.1594	26.4447	0.000193315	0.000261951	0.000344076
RGU296288N0920332E	RGS296288N0920332E	Active	Western	0.0727622	17.5469	19.287	21.4102	0.00045963	0.000631513	0.000841241	14.1469	15.887	18.0102	0.000370569	0.000520187	0.00070765	20.9469	22.687	24.8102	0.000548691	0.00074284	0.000974833
RGU295102N0920341E	RGS295102N0920341E	Active	Western	0.0266438	21.1983	23.3006	25.8656	0.000203329	0.000279367	0.000372145	17.7983	19.9006	22.4656	0.000170717	0.000238602	0.000323227	24.5983	26.7006	29.2656	0.000235941	0.000320132	0.000421063
RGU295545N0920357E	RGS295545N0920357E	Active	Western	0.0162045	11.2016	12.3124	13.6678	6.53456e-05	8.97824e-05	0.000119599	7.80156	8.9124	10.2678	4.55113e-05	6.49895e-05	8.98479e-05	14.6016	15.7124	17.0678	8.51799e-05	0.000114575	0.000149351
RGU295821N0920371E	RGS295821N0920371E	Active	Western	0.079173	13.6067	14.9561	16.6026	0.000387823	0.000532854	0.000709817	10.2067	11.5561	13.2026	0.000290915	0.000411719	0.000564455	17.0067	18.3561	20.0026	0.000484731	0.000653989	0.000855178
RGU294388N0920390E	RGS294388N0920390E	Active	Western	0.0141303	14.1042	15.5029	17.2096	7.17467e-05	9.85772e-05	0.000131315	10.7042	12.1029	13.8096	5.44513e-05	7.69579e-05	0.000105372	17.5042	18.9029	20.6096	8.90421e-05	0.000120196	0.000157258
RGU295375N0920402E	RGS295375N0920402E	Active	Western	0.0162061	10.7542	11.8206	13.1219	6.27417e-05	8.62047e-05	0.000114834	7.35416	8.42064	9.72193	4.29055e-05	6.14094e-05	8.50792e-05	14.1542	15.2206	16.5219	8.25779e-05	0.000111	0.000144588
RGU296257N0920425E	RGS296257N0920425E	Active	Western	0.0627799	22.5171	24.7501	27.4748	0.000508905	0.000699215	0.000931427	19.1171	21.3501	24.0748	0.000432062	0.000603162	0.000816163	25.9171	28.1501	30.8748	0.000585747	0.000795268	0.00104669
RGU295269N0920470E	RGS295269N0920470E	Active	Western	0.0155174	19.4405	21.3684	23.7207	0.000108599	0.000149211	0.000198765	16.0405	17.9684	20.3207	8.96062e-05	0.00012547	0.000170275	22.8405	24.7684	27.1207	0.000127593	0.000172953	0.000227255
RGU295743N0920516E	RGS295743N0920516E	Active	Western	0.0274275	11.9278	13.1107	14.554	0.000117774	0.000161817	0.000215557	8.52781	9.71068	11.154	8.42027e-05	0.000119853	0.0001652	15.3278	16.5107	17.954	0.000151345	0.000203781	0.000265914
RGU295823N0920538E	RGS295823N0920538E	Active	Western	0.0871168	13.5917	14.9396	16.5842	0.000426263	0.000585669	0.000780171	10.1917	11.5396	13.1842	0.000319632	0.00045238	0.000620225	16.9917	18.3396	19.9842	0.000532894	0.000718957	0.000940117
RGU295367N0920549E	RGS295367N0920549E	Active	Western	0.0237228	13.3282	14.65	16.2627	0.000113826	0.000156392	0.000208331	9.92824	11.25	12.8627	8.47892e-05	0.000120097	0.000164776	16.7282	18.05	19.6627	0.000142863	0.000192688	0.000251886
RGU296370N0920556E	RGS296370N0920556E	Active	Western	0.0104367	16.1118	17.7096	19.6592	6.05357e-05	8.31737e-05	0.000110796	12.7118	14.3096	16.2592	4.77612e-05	6.72055e-05	9.16342e-05	19.5118	21.1096	23.0592	7.33102e-05	9.91419e-05	0.000129958
RGU294844N0920557E	RGS294844N0920557E	Active	Western	0.0396628	15.5331	17.0735	18.9531	0.000221791	0.000304733	0.000405935	12.1331	13.6735	15.5531	0.000173244	0.000244049	0.000333115	18.9331	20.4735	22.3531	0.000270339	0.000365417	0.000478756
RGU296458N0920566E	RGS296458N0920566E	Active	Western	0.0278881	17.9746	19.7571	21.932	0.00018046	0.000247944	0.000330288	14.5746	16.3571	18.532	0.000146325	0.000205276	0.000279085	21.3746	23.1571	25.332	0.000214595	0.000290613	0.00038149
RGU296494N0920572E	RGS296494N0920572E	Active	Western	0.027139	12.8794	14.1566	15.7151	0.000125832	0.000172888	0.000230305	9.47938	10.7566	12.3151	9.2614e-05	0.000131366	0.000180478	16.2794	17.5566	19.1151	0.00015905	0.000214411	0.000280133
RGU296563N0920582E	RGS296563N0920582E	Active	Western	0.0504375	13.6419	14.9948	16.6455	0.000247704	0.000340335	0.000453362	10.2419	11.5948	13.2455	0.000185968	0.000263166	0.000360759	17.0419	18.3948	20.0455	0.000309439	0.000417505	0.000545965
RGU296347N0920636E	RGS296347N0920636E	Active	Western	0.0130204	11.5879	12.7371	14.1393	5.43167e-05	7.4629e-05	9.94136e-05	8.18793	9.33709	10.7393	3.83797e-05	5.47078e-05	7.55081e-05	14.9879	16.1371	17.5393	7.02537e-05	9.45503e-05	0.000123319
RGU295386N0920642E	RGS295386N0920642E	Active	Western	0.0289441	10.5195	11.5627	12.8356	0.000109612	0.000150603	0.000200619	7.11952	8.16273	9.43562	7.41846e-05	0.000106318	0.000147477	13.9195	14.9627	16.2356	0.00014504	0.000194887	0.00025376
RGU296560N0920663E	RGS296560N0920663E	Active	Western	0.0132879	13.1544	14.4589	16.0506	6.29259e-05	8.64578e-05	0.000115171	9.7544	11.0589	12.6506	4.66615e-05	6.61273e-05	9.07741e-05	16.5544	17.8589	19.4506	7.91903e-05	0.000106788	0.000139567
RGU295361N0920666E	RGS295361N0920666E	Active	Western	0.0150124	14.9935	16.4804	18.2947	8.10321e-05	0.000111335	0.00014831	11.5935	13.0804	14.8947	6.26569e-05	8.83659e-05	0.000120747	18.3935	19.8804	21.6947	9.94073e-05	0.000134304	0.000175873
RGU296538N0920668E	RGS296545N0920673E	Active	Western	0.0351437	26.3172	28.927	32.1115	0.000332958	0.000457471	0.000609399	22.9172	25.527	28.7115	0.000289942	0.000403701	0.000544875	29.7172	32.327	35.5115	0.000375974	0.000511241	0.000673923
RGU293535N0920674E	RGS296545N0920673E	Active	Western	0.0296824	19.422	21.3481	23.6982	0.000207537	0.000285148	0.000379846	16.022	17.9481	20.2982	0.000171206	0.000239734	0.000325349	22.822	24.7481	27.0982	0.000243868	0.000330562	0.000434343
RGU296551N0920674E	RGS296172N0924548E	Active	Western	0.0301365	9.47796	10.4179	11.5647	0.000102828	0.000141281	0.000188201	6.07796	7.01788	8.16475	6.59406e-05	9.51724e-05	0.000132871	12.878	13.8179	14.9647	0.000139715	0.00018739	0.000243532
RGU295374N0920690E	RGS295996N0924566E	Active	Western	0.0298186	12.4278	13.6602	15.164	0.000133408	0.000183297	0.000244171	9.02775	10.2602	11.764	9.69101e-05	0.000137675	0.000189424	15.8278	17.0602	18.564	0.000169906	0.00022892	0.000298918
RGU296420N0920709E	RGS295996N0924566E	Active	Western	0.0149343	9.77447	10.7438	11.9265	5.25509e-05	7.22029e-05	9.61817e-05	6.37447	7.3438	8.52654	3.42714e-05	4.93535e-05	6.87624e-05	13.1745	14.1438	15.3265	7.08305e-05	9.50524e-05	0.000123601
RGU295738N0920721E	RGS295996N0924566E	Transitional	Western	0.0408177	13.3882	14.7158	16.3359	0.00019673	0.0002703	0.000360067	9.98816	11.3158	12.9359	0.00014677	0.000207849	0.000285126	16.7882	18.1158	19.7359	0.000246691	0.000332751	0.000435009
RGU295375N0920722E	RGS296075N0924482E	Active	Western	0.0254794	10.8416	11.9167	13.2286	9.9445e-05	0.000136634	0.00018201	7.44156	8.51671	9.82857	6.82583e-05	9.76502e-05	0.00013523	14.2416	15.3167	16.6286	0.000130632	0.000175617	0.00022879
RGU295307N0920730E	RGS296075N0924482E	Active	Western	0.0109184	10.4165	11.4494	12.7099	4.09433e-05	5.62545e-05	7.49368e-05	7.01645	8.04944	9.30987	2.75791e-05	3.95493e-05	5.48906e-05	13.8165	14.8494	16.1099	5.43075e-05	7.29597e-05	9.49831e-05
RGU293589N0920739E	RGS296075N0924482E	Active	Western	0.0100193	8.6374	9.49396	10.5391	3.11548e-05	4.28055e-05	5.70213e-05	5.2374	6.09396	7.13911	1.88911e-05	2.74759e-05	3.86258e-05	12.0374	12.894	13.9391	4.34185e-05	5.81351e-05	7.54168e-05
RGU296302N0920752E	RGS295797N0924470E	Active	Western	0.0104863	9.91988	10.9036	12.104	3.74481e-05	5.14523e-05	6.85397e-05	6.51988	7.50363	8.70396	2.46129e-05	3.54083e-05	4.92869e-05	13.3199	14.3036	15.504	5.02833e-05	6.74963e-05	8.77925e-05
RGU296328N0920769E	RGS295797N0924470E	Active	Western	0.0404712	14.9063	16.3845	18.1882	0.000217179	0.000298395	0.000397494	11.5063	12.9845	14.7882	0.000167642	0.000236474	0.000323188	18.3063	19.7845	21.5882	0.000266716	0.000360316	0.000471799
RGU294154N0920781E	RGS295797N0924470E	Active	Western	0.018397	17.5004	19.2359	21.3535	0.000115903	0.000159247	0.000212133	14.1004	15.8359	17.9535	9.33854e-05	0.000131099	0.000178356	20.9004	22.6359	24.7535	0.000138421	0.000187394	0.00024591
RGU296507N0920785E	RGS296769N0924696E	Active	Western	0.0111662	10.0733	11.0723	12.2912	4.04933e-05	5.56362e-05	7.41132e-05	6.67334	7.6723	8.89121	2.68258e-05	3.85519e-05	5.36119e-05	13.4733	14.4723	15.6912	5.41608e-05	7.27206e-05	9.46144e-05
RGU293916N0920836E	RGS296991N0924744E	Active	Western	0.0156813	13.5803	14.927	16.5703	7.66642e-05	0.000105334	0.000140315	10.1803	11.527	13.1703	5.74703e-05	8.13413e-05	0.000111524	16.9803	18.327	19.9703	9.58581e-05	0.000129326	0.000169106
RGU293626N0920814E	RGS296991N0924744E	Active	Western	0.0172279	10.0086	11.0011	12.2122	6.20736e-05	8.52867e-05	0.000113611	6.60857	7.60111	8.81218	4.09866e-05	5.8928e-05	8.19802e-05	13.4086	14.4011	15.6122	8.31605e-05	0.000111645	0.000145241
RGU295275N0920820E	RGS296026N0924845E	Active	Western	0.0436164	12.1421	13.3462	14.8155	0.000190654	0.000261951	0.000348946	8.74211	9.94623	11.4155	0.000137268	0.000195218	0.000268867	15.5421	16.7462	18.2155	0.000244041	0.000328685	0.000429026
RGU293645N0920854E	RGS296026N0924845E	Active	Western	0.0258544	15.9231	17.5022	19.429	0.000148206	0.000203629	0.000271255	12.5231	14.1022	16.029	0.00011656	0.000164072	0.000223786	19.3231	20.9022	22.829	0.000179851	0.000243186	0.000318723
RGU293762N0920862E	RGS296026N0924845E	Active	Western	0.0214986	17.4424	19.1722	21.2828	0.000134995	0.000185478	0.000247077	14.0424	15.7722	17.8828	0.000108681	0.000152586	0.000207605	20.8424	22.5722	24.6828	0.00016131	0.000218371	0.000286548
RGU293644N0920890E	RGS296375N0924652E	Active	Western	0.0436233	17.5059	19.2419	21.3602	0.000274919	0.000377728	0.000503172	14.1059	15.8419	17.9602	0.000221524	0.000310984	0.00042308	20.9059	22.6419	24.7602	0.000328314	0.000444471	0.000583265
RGU294366N0920909E	RGS296375N0924652E	Active	Western	0.0728195	10.0102	11.0029	12.2142	0.000262418	0.000360552	0.000480292	6.6102	7.6029	8.81416	0.000173287	0.000249138	0.000346595	13.4102	14.4029	15.6142	0.000351549	0.000471966	0.000613989
RGU294728N0920897E	RGS296375N0924652E	Active	Western	0.0316935	12.2865	13.5049	14.9916	0.000140185	0.000192608	0.000256574	8.88646	10.1049	11.5916	0.000101392	0.000144117	0.000198385	15.6865	16.9049	18.3916	0.000178977	0.000241099	0.000314763
RGU294450N0920912E	RGS296375N0924652E	Active	Western	0.021132	14.1689	15.574	17.2884	0.00010779	0.000148099	0.000197283	10.7689	12.174	13.8884	8.19242e-05	0.000115767	0.000158485	17.5689	18.974	20.6884	0.000133655	0.000180431	0.000236081
RGU294279N0920904E	RGS296375N0924652E	Active	Western	0.0318024	15.7104	17.2684	19.1694	0.000179866	0.000247129	0.000329202	12.3104	13.8684	15.7694	0.00014094	0.000198471	0.000270812	19.1104	20.6684	22.5694	0.000218792	0.000295787	0.000387591
RGU293775N0920934E	RGS296375N0924652E	Active	Western	0.0115025	12.8942	14.1729	15.7332	5.33938e-05	7.33609e-05	9.77244e-05	9.49424	10.7729	12.3332	3.93147e-05	5.57621e-05	7.66058e-05	16.2942	17.5729	19.1332	6.74728e-05	9.09598e-05	0.000118843
RGU295412N0920934E	RGS296667N0925107E	Active	Western	0.0112251	12.1408	13.3447	14.8138	4.90613e-05	6.74084e-05	8.97949e-05	8.74075	9.94474	11.4138	3.53218e-05	5.02339e-05	6.91856e-05	15.5408	16.7447	18.2138	6.28009e-05	8.45828e-05	0.000110404
RGU294263N0920957E	RGS296667N0925107E	Active	Western	0.0118126	21.0268	23.112	25.6563	8.94173e-05	0.000122856	0.000163657	17.6268	19.712	22.2563	7.49586e-05	0.000104783	0.000141969	24.4268	26.512	29.0563	0.000103876	0.000140929	0.000185345
RGU295993N0920937E	RGS296798N0925066E	Active	Western	0.0434561	16.6314	18.2807	20.2932	0.000260185	0.000357484	0.000476206	13.2314	14.8807	16.8932	0.000206995	0.000290996	0.00039642	20.0314	21.6807	23.6932	0.000313375	0.000423972	0.000555991
RGU294270N0920942E	RGS296798N0925066E	Active	Western	0.0167967	13.0595	14.3546	15.9348	7.89682e-05	0.000108499	0.000144532	9.6595	10.9546	12.5348	5.84091e-05	8.28004e-05	0.000113694	16.4595	17.7546	19.3348	9.95274e-05	0.000134198	0.000175371
RGU295265N0920959E	RGS296798N0925066E	Transitional	Western	0.0281971	16.7672	18.43	20.4588	0.000170203	0.000233852	0.000311515	13.3672	15.03	17.0588	0.00013569	0.000190711	0.000259745	20.1672	21.83	23.8588	0.000204716	0.000276994	0.000363285
RGU294735N0920972E	RGS296750N0925250E	Active	Western	0.0224647	13.6222	14.9731	16.6214	0.000110166	0.000151364	0.000201633	10.2222	11.5731	13.2214	8.26697e-05	0.000116994	0.000160388	17.0222	18.3731	20.0214	0.000137663	0.000185735	0.000242878
RGU294261N0920977E	RGS297829N0925098E	Active	Western	0.0343509	16.709	18.366	20.3878	0.000206628	0.000283899	0.000378183	13.309	14.966	16.9878	0.000164583	0.000231342	0.000315115	20.109	21.766	23.7878	0.000248674	0.000336456	0.000441251
RGU293684N0920999E	RGS297829N0925098E	Active	Western	0.0248202	17.2627	18.9747	21.0635	0.000154247	0.00021193	0.000282312	13.8627	15.5747	17.6635	0.000123867	0.000173955	0.000236743	20.6627	22.3747	24.4635	0.000184627	0.000249905	0.000327882
RGU293712N0921013E	RGS297829N0925098E	Active	Western	0.0149726	11.6939	12.8536	14.2686	6.30318e-05	8.66032e-05	0.000115364	8.29394	9.45361	10.8686	4.47054e-05	6.36952e-05	8.78748e-05	15.0939	16.2536	17.6686	8.13582e-05	0.000109511	0.000142854
RGU293790N0921037E	RGS298328N0925182E	Active	Western	0.0139049	21.4467	23.5736	26.1687	0.000107357	0.000147505	0.000196492	18.0467	20.1736	22.7687	9.03377e-05	0.00012623	0.000170962	24.8467	26.9736	29.5687	0.000124377	0.000168779	0.000222021
RGU294209N0921027E	RGS294787N0924993E	Active	Western	0.0138895	10.8345	11.9089	13.22	5.41747e-05	7.4434e-05	9.91538e-05	7.4345	8.50894	9.81995	3.7174e-05	5.31831e-05	7.36527e-05	14.2345	15.3089	16.62	7.11755e-05	9.56849e-05	0.000124655
RGU294298N0921038E	RGS294787N0924993E	Active	Western	0.0121109	10.7844	11.8538	13.1588	4.70191e-05	6.46024e-05	8.6057e-05	7.38435	8.45383	9.75877	3.21953e-05	4.60726e-05	6.38214e-05	14.1844	15.2538	16.5588	6.18428e-05	8.31321e-05	0.000108293
RGU295895N0921040E	RGS295048N0925034E	Active	Western	0.0186328	11.2979	12.4183	13.7854	7.57844e-05	0.000104125	0.000138705	7.89791	9.01831	10.3854	5.29778e-05	7.56166e-05	0.000104495	14.6979	15.8183	17.1854	9.8591e-05	0.000132633	0.000172915
RGU295367N0921064E	RGS295048N0925034E	Active	Western	0.0319317	14.8756	16.3508	18.1508	0.000171001	0.000234949	0.000312977	11.4756	12.9508	14.7508	0.000131917	0.000186094	0.00025435	18.2756	19.7508	21.5508	0.000210086	0.000283805	0.000371603
RGU295343N0921014E	RGS295048N0925034E	Active	Western	0.0144758	8.68165	9.5426	10.5931	4.52425e-05	6.21614e-05	8.28055e-05	5.28165	6.1426	7.19311	2.75242e-05	4.00135e-05	5.62279e-05	12.0817	12.9426	13.9931	6.29608e-05	8.43094e-05	0.000109383
RGU295945N0921070E	RGS295034N0925196E	Active	Western	0.0245285	20.0799	22.0712	24.5009	0.000177311	0.000243618	0.000324524	16.6799	18.6712	21.1009	0.000147288	0.000206089	0.00027949	23.4799	25.4712	27.9009	0.000207333	0.000281146	0.000369558
RGU295292N0921086E	RGS295034N0925196E	Active	Western	0.0240853	13.0425	14.3359	15.9141	0.000113088	0.000155378	0.00020698	9.64253	10.9359	12.5141	8.36074e-05	0.000118528	0.000162759	16.4425	17.7359	19.3141	0.000142568	0.000192229	0.0002512
RGU294231N0921109E	RGS295188N0925054E	Active	Western	0.0188561	19.5633	21.5033	23.8705	0.000132799	0.000182461	0.000243056	16.1633	18.1033	20.4705	0.000109719	0.000153611	0.000208437	22.9633	24.9033	27.2705	0.000155879	0.00021131	0.000277676
RGU294284N0921138E	RGS295188N0925054E	Active	Western	0.0540149	18.2101	20.016	22.2194	0.000354102	0.000486522	0.000648097	14.8101	16.616	18.8194	0.000287987	0.000403879	0.000548926	21.6101	23.416	25.6194	0.000420216	0.000569165	0.000747269
RGU295811N0921120E	RGS295144N0925123E	Active	Western	0.0270373	15.0943	16.5912	18.4176	0.000146919	0.000201861	0.0002689	11.6943	13.1912	15.0176	0.000113826	0.000160494	0.00021926	18.4943	19.9912	21.8176	0.000180013	0.000243229	0.000318541
RGU294847N0921113E	RGS295144N0925123E	Active	Western	0.0186586	12.1063	13.3069	14.7718	8.13189e-05	0.000111729	0.000148835	8.70629	9.90686	11.3718	5.84809e-05	8.31815e-05	0.000114578	15.5063	16.7069	18.1718	0.000104157	0.000140277	0.000183092
RGU294402N0921130E	RGS295144N0925123E	Active	Western	0.0328126	10.8683	11.9461	13.2612	0.000128382	0.000176392	0.000234972	7.46829	8.54608	9.86118	8.82194e-05	0.000126189	0.000174728	14.2683	15.3461	16.6612	0.000168545	0.000226595	0.000295216
RGU294170N0921175E	RGS296052N0925124E	Transitional	Western	0.0619666	12.4544	13.6895	15.1965	0.000277832	0.000381731	0.000508505	9.05438	10.2895	11.7965	0.000201985	0.000286922	0.000394734	15.8544	17.0895	18.5965	0.000353679	0.00047654	0.000622276
RGU294482N0921071E	RGS296052N0925124E	Active	Western	0.0349118	16.5145	18.1523	20.1506	0.000207559	0.000285178	0.000379886	13.1145	14.7523	16.7506	0.000164827	0.000231763	0.000315788	19.9145	21.5523	23.5506	0.000250291	0.000338592	0.000443984
RGU294881N0921154E	RGS296052N0925124E	Active	Western	0.0281017	11.8918	13.0711	14.51	0.000120305	0.000165294	0.000220189	8.49178	9.67108	11.11	8.59082e-05	0.000122298	0.000168594	15.2918	16.4711	17.91	0.000154701	0.00020829	0.000271783
RGU294904N0921186E	RGS296058N0924914E	Active	Western	0.0251834	14.3525	15.7758	17.5125	0.00013012	0.00017878	0.000238153	10.9525	12.3758	14.1125	9.92954e-05	0.000140249	0.000191916	17.7525	19.1758	20.9125	0.000160944	0.00021731	0.00028439
RGU294403N0921201E	RGS296058N0924914E	Active	Western	0.0283094	11.2727	12.3906	13.7546	0.000114884	0.000157847	0.000210268	7.87269	8.99059	10.3546	8.02337e-05	0.000114533	0.000158292	14.6727	15.7906	17.1546	0.000149535	0.00020116	0.000262244
RGU294995N0921214E	RGS296058N0924914E	Active	Western	0.0918895	15.1633	16.667	18.5018	0.000501605	0.000689186	0.000918067	11.7633	13.267	15.1018	0.000389133	0.000548595	0.000749358	18.5633	20.067	21.9018	0.000614078	0.000829777	0.00108678
RGU296548N0921205E	RGS298157N0925518E	Active	Western	0.0139236	12.4911	13.7299	15.2413	6.26119e-05	8.60263e-05	0.000114596	9.09113	10.3299	11.8413	4.55694e-05	6.47232e-05	8.90322e-05	15.8911	17.1299	18.6413	7.96544e-05	0.000107329	0.00014016
RGU295784N0921202E	RGS298157N0925518E	Active	Western	0.0104861	12.2354	13.4487	14.9292	4.61885e-05	6.34612e-05	8.45368e-05	8.83535	10.0487	11.5292	3.33535e-05	4.74174e-05	6.52843e-05	15.6354	16.8487	18.3292	5.90235e-05	7.95049e-05	0.000103789
RGU295798N0921157E	RGS298157N0925518E	Active	Western	0.0515384	12.3975	13.627	15.1271	0.000230021	0.000316041	0.000420999	8.99752	10.227	11.7271	0.000166938	0.000237187	0.000326374	15.7975	17.027	18.5271	0.000293104	0.000394894	0.000515623
RGU294252N0921229E	RGS296926N0925646E	Transitional	Western	0.0325698	13.4303	14.7621	16.3873	0.000157472	0.00021636	0.000288214	10.0303	11.3621	12.9873	0.000117606	0.000166528	0.000228416	16.8303	18.1621	19.7873	0.000197337	0.000266192	0.000348012
RGU296593N0921241E	RGS296926N0925646E	Transitional	Western	0.0460435	23.5543	25.8902	28.7403	0.000390428	0.000536434	0.000714585	20.1543	22.4902	25.3403	0.000334071	0.000465987	0.000630049	26.9543	29.2902	32.1403	0.000446786	0.00060688	0.000799121
RGU295716N0921275E	RGS297669N0925295E	Active	Western	0.0360821	25.7017	28.2505	31.3605	0.000333853	0.000458701	0.000611038	22.3017	24.8505	27.9605	0.000289689	0.000403496	0.000544791	29.1017	31.6505	34.7605	0.000378018	0.000513907	0.000677284
RGU293418N0921324E	RGS295275N0925392E	Transitional	Western	0.026657	10.3435	11.3692	12.6208	9.92615e-05	0.000136381	0.000181674	6.94348	7.96923	9.22083	6.66333e-05	9.55962e-05	0.000132732	13.7435	14.7692	16.0208	0.00013189	0.000177167	0.000230616
RGU294547N0921336E	RGS295817N0925430E	Active	Western	0.0207072	12.8596	14.1349	15.6909	9.5863e-05	0.000131712	0.000175454	9.45958	10.7349	12.2909	7.05174e-05	0.00010003	0.000137436	16.2596	17.5349	19.0909	0.000121209	0.000163394	0.000213472
RGU294679N0921347E	RGS295817N0925430E	Active	Western	0.0400824	13.0258	14.3175	15.8937	0.000187958	0.000258246	0.000344011	9.62578	10.9175	12.4937	0.000138897	0.00019692	0.00027042	16.4258	17.7175	19.2937	0.000237018	0.000319572	0.000417602
RGU294752N0921366E	RGS295817N0925430E	Active	Western	0.0150954	11.9838	13.1722	14.6223	6.51241e-05	8.9478e-05	0.000119194	8.58381	9.77223	11.2223	4.66474e-05	6.63821e-05	9.14788e-05	15.3838	16.5722	18.0223	8.36009e-05	0.000112574	0.000146909
RGU295828N0921344E	RGS295817N0925430E	Active	Western	0.0455622	14.6582	16.1119	17.8856	0.00024043	0.000330342	0.00044005	11.2582	12.7119	14.4856	0.000184662	0.000260632	0.000356397	18.0582	19.5119	21.2856	0.000296199	0.000400052	0.000523702
RGU293411N0921344E	RGS296195N0922263E	Active	Western	0.0200579	10.042	11.0379	12.253	7.25121e-05	9.96288e-05	0.000132716	6.64203	7.63789	8.85301	4.79612e-05	6.89402e-05	9.58895e-05	13.442	14.4379	15.653	9.7063e-05	0.000130317	0.000169542
RGU294950N0921374E	RGS298503N0923106E	Active	Western	0.0139598	10.905	11.9865	13.306	5.48035e-05	7.52979e-05	0.000100305	7.50503	8.58647	9.90602	3.77167e-05	5.39394e-05	7.46744e-05	14.305	15.3865	16.706	7.18903e-05	9.66564e-05	0.000125935
RGU295375N0921384E	RGS298503N0923106E	Active	Western	0.0431496	11.2472	12.3626	13.7236	0.000174713	0.000240049	0.00031977	7.84725	8.96262	10.3236	0.000121898	0.00017403	0.000240548	14.6472	15.7626	17.1236	0.000227528	0.000306068	0.000398993
RGU296126N0921380E	RGS298503N0923106E	Transitional	Western	0.0324007	10.1853	11.1954	12.4278	0.000118804	0.000163232	0.000217442	6.78532	7.79539	9.02784	7.91457e-05	0.000113659	0.000157955	13.5853	14.5954	15.8278	0.000158463	0.000212805	0.00027693
RGU293795N0921347E	RGS298004N0923064E	Active	Western	0.0838756	12.7705	14.0369	15.5822	0.000385607	0.00052981	0.000705761	9.37048	10.6369	12.1822	0.000282944	0.00040148	0.000551766	16.1705	17.4369	18.9822	0.000488271	0.000658139	0.000859757
RGU295857N0921409E	RGS298004N0923064E	Active	Western	0.108497	20.4163	22.4409	24.9114	0.000797437	0.00109565	0.00145952	17.0163	19.0409	21.5114	0.000664637	0.000929647	0.00126032	23.8163	25.8409	28.3114	0.000930237	0.00126165	0.00165872
RGU295775N0921461E	RGS298687N0923151E	Active	Western	0.0337076	12.1585	13.3642	14.8354	0.00014754	0.000202714	0.000270036	8.75847	9.96422	11.4354	0.000106282	0.000151142	0.000208149	15.5585	16.7642	18.2354	0.000188798	0.000254287	0.000331924
RGU296355N0921420E	RGS298289N0923944E	Active	Western	0.0286661	13.2022	14.5114	16.1089	0.000136243	0.000187193	0.000249361	9.80216	11.1114	12.7089	0.000101156	0.000143334	0.00019673	16.6022	17.9114	19.5089	0.000171331	0.000231052	0.000301992
RGU296271N0921433E	RGS293599N0924736E	Active	Western	0.0113535	9.67255	10.6318	11.8022	3.95343e-05	5.43187e-05	7.23581e-05	6.27255	7.23177	8.40218	2.56376e-05	3.69478e-05	5.1513e-05	13.0726	14.0318	15.2022	5.34311e-05	7.16896e-05	9.32032e-05
RGU296614N0921434E	RGS293807N0924785E	Transitional	Western	0.010745	9.60039	10.5524	11.7141	3.71363e-05	5.10238e-05	6.7969e-05	6.20039	7.15245	8.31413	2.39844e-05	3.45839e-05	4.82411e-05	13.0004	13.9524	15.1141	5.02882e-05	6.74637e-05	8.76968e-05
RGU296331N0921480E	RGS293807N0924785E	Active	Western	0.0233718	8.26471	9.08432	10.0844	6.9538e-05	9.55425e-05	0.000127272	4.86471	5.68432	6.68437	4.09309e-05	5.97837e-05	8.43619e-05	11.6647	12.4843	13.4844	9.81451e-05	0.000131301	0.000170183
RGU296548N0921485E	RGS293274N0924501E	Active	Western	0.173926	15.8401	17.411	19.3277	0.000991807	0.0013627	0.00181526	12.4401	14.011	15.9277	0.000778921	0.0010966	0.00149593	19.2401	20.811	22.7277	0.00120469	0.00162881	0.00213459
RGU296494N0921503E	RGS294494N0924928E	Active	Western	0.0759943	21.1872	23.2883	25.8521	0.000579639	0.000796402	0.00106089	17.7872	19.8883	22.4521	0.000486622	0.00068013	0.000921364	24.5872	26.6883	29.2521	0.000672656	0.000912673	0.00120041
RGU296519N0921511E	RGS292194N0925469E	Active	Western	0.036637	20.1567	22.1556	24.5947	0.000265853	0.000365272	0.00048658	16.7567	18.7556	21.1947	0.00022101	0.000309218	0.000419315	23.5567	25.5556	27.9947	0.000310697	0.000421327	0.000553846
RGU296444N0921558E	RGS294437N0925761E	Active	Western	0.0410128	19.1296	21.0267	23.3414	0.000282441	0.000388063	0.00051694	15.7296	17.6267	19.9414	0.000232241	0.000325314	0.000441641	22.5296	24.4267	26.7414	0.000332641	0.000450813	0.00059224
RGU295447N0921552E	RGS294437N0925761E	Active	Western	0.0114534	15.9126	17.4906	19.4161	6.56112e-05	9.01473e-05	0.000120085	12.5126	14.0906	16.0161	5.15922e-05	7.26235e-05	9.9057e-05	19.3126	20.8906	22.8161	7.96302e-05	0.000107671	0.000141114
RGU296587N0921579E	RGS294405N0925713E	Active	Western	0.0347008	20.0409	22.0284	24.4534	0.000250357	0.00034398	0.000458218	16.6409	18.6284	21.0534	0.000207883	0.000290888	0.000394507	23.4409	25.4284	27.8534	0.00029283	0.000397073	0.000521928
RGU296611N0921566E	RGS294405N0925713E	Active	Western	0.0617595	13.4888	14.8265	16.4587	0.000299902	0.000412054	0.000548899	10.0888	11.4265	13.0587	0.000224309	0.000317562	0.000435509	16.8888	18.2265	19.8587	0.000375496	0.000506546	0.000662289
RGU296566N0921569E	RGS293544N0924219E	Active	Western	0.0107239	15.721	17.28	19.1823	6.06924e-05	8.33891e-05	0.000111083	12.321	13.88	15.7823	4.75664e-05	6.69815e-05	9.13938e-05	19.121	20.68	22.5823	7.38185e-05	9.97966e-05	0.000130772
RGU296661N0921565E	RGS293544N0924219E	Transitional	Western	0.0443063	17.5789	19.3222	21.4493	0.000280388	0.000385242	0.000513183	14.1789	15.9222	18.0493	0.000226157	0.000317454	0.000431836	20.9789	22.7222	24.8493	0.000334619	0.000453031	0.000594529
RGU295353N0921580E	RGS293544N0924219E	Active	Western	0.0243684	10.8619	11.9391	13.2534	9.52875e-05	0.000130921	0.000174401	7.46191	8.53908	9.85341	6.54606e-05	9.36377e-05	0.00012966	14.2619	15.3391	16.6534	0.000125114	0.000168205	0.000219141
RGU296447N0921622E	RGS297471N0926263E	Transitional	Western	0.0731668	16.2834	17.8982	19.8686	0.000428906	0.0005893	0.000785009	12.8834	14.4982	16.4686	0.00033935	0.000477355	0.000650675	19.6834	21.2982	23.2686	0.000518462	0.000701245	0.000919343
RGU296702N0921621E	RGS297471N0926263E	Active	Western	0.0872545	16.3396	17.9599	19.9371	0.000513253	0.000705189	0.000939385	12.9396	14.5599	16.5371	0.000406453	0.00057169	0.000779186	19.7396	21.3599	23.3371	0.000620052	0.000838689	0.00109958
RGU296274N0921633E	RGS296123N0926809E	Active	Western	0.0772395	13.4614	14.7964	16.4252	0.000374311	0.000514289	0.000685086	10.0614	11.3964	13.0252	0.00027977	0.000396112	0.000543274	16.8614	18.1964	19.8252	0.000468852	0.000632465	0.000826897
RGU296224N0921634E	RGS296123N0926809E	Active	Western	0.0537887	14.0284	15.4196	17.1171	0.000271645	0.00037323	0.00049718	10.6284	12.0196	13.7171	0.000205808	0.000290933	0.000398424	17.4284	18.8196	20.5171	0.000337482	0.000455526	0.000595936
RGU296296N0921660E	RGS297438N0927336E	Active	Western	0.08246	12.3552	13.5805	15.0755	0.000366772	0.00050393	0.000671287	8.95522	10.1805	11.6755	0.000265841	0.000377767	0.000519891	15.7552	16.9805	18.4755	0.000467703	0.000630094	0.000822684
RGU296168N0921660E	RGS297438N0927336E	Active	Western	0.0212202	13.6427	14.9956	16.6464	0.00010422	0.000143194	0.00019075	10.2427	11.5956	13.2464	7.82466e-05	0.000110728	0.000151789	17.0427	18.3956	20.0464	0.000130194	0.000175661	0.00022971
RGU296135N0921580E	RGS297438N0927336E	Active	Western	0.0270473	18.0429	19.8322	22.0155	0.000175685	0.000241384	0.000321548	14.6429	16.4322	18.6155	0.000142579	0.000200002	0.00027189	21.4429	23.2322	25.4155	0.000208791	0.000282766	0.000371207
RGU296393N0921683E	RGS296253N0927825E	Transitional	Western	0.0605988	19.7316	21.6884	24.076	0.000430457	0.000591431	0.000787847	16.3316	18.2884	20.676	0.000356284	0.000498715	0.000676588	23.1316	25.0884	27.476	0.00050463	0.000684147	0.000899107
RGU296609N0921743E	RGS296253N0927825E	Transitional	Western	0.0299728	15.8515	17.4235	19.3416	0.000171041	0.000235004	0.000313049	12.4515	14.0235	15.9416	0.000134354	0.000189145	0.000258019	19.2515	20.8235	22.7416	0.000207728	0.000280862	0.000368079
RGU296165N0921740E	RGS297404N0928435E	Active	Western	0.0128678	22.2749	24.4839	27.1792	0.000103186	0.000141774	0.000188857	18.8749	21.0839	23.7792	8.7436e-05	0.000122086	0.000165232	25.6749	27.8839	30.5792	0.000118936	0.000161461	0.000212483
RGU297203N0925136E	RGS297533N0928556E	Transitional	Central	0.0660688	15.6186	17.1674	19.0573	0.000371484	0.000510404	0.000679911	12.2186	13.7674	15.6573	0.000290616	0.000409319	0.000558609	19.0186	20.5674	22.4573	0.000452352	0.00061149	0.000801214
RGU297385N0925083E	RGS297681N0929004E	Active	Central	0.0153453	12.832	14.1046	15.6573	7.08884e-05	9.73979e-05	0.000129744	9.43204	10.7046	12.2573	5.21057e-05	7.39195e-05	0.00010157	16.232	17.5046	19.0573	8.96711e-05	0.000120876	0.000157918
RGU297493N0925148E	RGS296172N0924548E	Transitional	Central	0.0188551	16.3739	17.9977	19.979	0.000111143	0.000152706	0.00020342	12.9739	14.5977	16.579	8.80644e-05	0.000123858	0.000168803	19.7739	21.3977	23.379	0.000134222	0.000181554	0.000238038
RGU297371N0924986E	RGS296034N0925995E	Active	Central	0.0177206	28.3738	31.1876	34.621	0.000181008	0.000248698	0.000331292	24.9738	27.7876	31.221	0.000159318	0.000221586	0.000298757	31.7738	34.5876	38.021	0.000202698	0.000275811	0.000363827
RGU297405N0924910E	RGS296034N0925995E	Transitional	Central	0.0510155	15.3606	16.8839	18.7426	0.000282106	0.000387603	0.000516328	11.9606	13.4839	15.3426	0.000219663	0.00030955	0.000422663	18.7606	20.2839	22.1426	0.000344549	0.000465657	0.000609992
RGU297483N0924966E	RGS295996N0924566E	Active	Central	0.0505905	16.913	18.5902	20.6367	0.000308029	0.00042322	0.000563773	13.513	15.1902	17.2367	0.000246106	0.000345817	0.000470889	20.313	21.9902	24.0367	0.000369952	0.000500624	0.000656657
RGU297644N0924979E	RGS295996N0924566E	Active	Central	0.0670653	16.7589	18.4209	20.4488	0.000404619	0.000555931	0.000740558	13.3589	15.0209	17.0488	0.000322531	0.000453321	0.000617426	20.1589	21.8209	23.8488	0.000486707	0.000658541	0.00086369
RGU297654N0925013E	RGS295996N0924566E	Active	Central	0.0436686	18.7667	20.6278	22.8986	0.000295026	0.000405354	0.000539974	15.3667	17.2278	19.4986	0.000241576	0.000338541	0.000459798	22.1667	24.0278	26.2986	0.000348476	0.000472167	0.000620149
RGU297511N0925060E	RGS295996N0924566E	Active	Central	0.0145202	21.5054	23.638	26.2402	0.000112414	0.000154453	0.000205747	18.1054	20.238	22.8402	9.46415e-05	0.000132237	0.000179088	24.9054	27.038	29.6402	0.000130187	0.000176669	0.000232406
RGU297770N0924908E	RGS295600N0926428E	Active	Central	0.367353	17.4556	19.1866	21.2988	0.00230845	0.00317172	0.00422506	14.0556	15.7866	17.8988	0.00185881	0.00260967	0.0035506	20.8556	22.5866	24.6988	0.00275809	0.00373377	0.00489952
RGU297783N0924944E	RGS295481N0926318E	Active	Central	0.0283842	15.5534	17.0958	18.9778	0.000158929	0.000218362	0.000290881	12.1534	13.6958	15.5778	0.000124187	0.000174934	0.000238768	18.9534	20.4958	22.3778	0.000193671	0.00026179	0.000342994
RGU297830N0925103E	RGS296075N0924482E	Transitional	Central	0.105429	21.3958	23.5176	26.1065	0.000812064	0.00111574	0.00148629	17.9958	20.1176	22.7065	0.000683019	0.000954438	0.00129272	24.7958	26.9176	29.5065	0.000941109	0.00127705	0.00167985
RGU297795N0925050E	RGS296075N0924482E	Transitional	Central	0.0297066	23.0307	25.3146	28.1014	0.000246299	0.000338405	0.00045079	19.6307	21.9146	24.7014	0.000209938	0.000292954	0.000396249	26.4307	28.7146	31.5014	0.00028266	0.000383856	0.000505332
RGU297823N0925151E	RGS296075N0924482E	Active	Central	0.0397215	20.4633	22.4926	24.9687	0.000292619	0.000402048	0.000535569	17.0633	19.0926	21.5687	0.000244	0.000341274	0.00046264	23.8633	25.8926	28.3687	0.000341238	0.000462821	0.000608498
RGU297753N0925077E	RGS296075N0924482E	Active	Central	0.0441282	21.7949	23.9563	26.5935	0.000346237	0.000475716	0.000633702	18.3949	20.5563	23.1935	0.000292224	0.0004082	0.000552683	25.1949	27.3563	29.9935	0.00040025	0.000543232	0.000714722
RGU297857N0924892E	RGS295504N0926894E	Active	Central	0.164615	22.639	24.884	27.6234	0.00134162	0.00184333	0.00245551	19.239	21.484	24.2234	0.00114013	0.00159147	0.00215328	26.039	28.284	31.0234	0.00154311	0.00209519	0.00275774
RGU297907N0924968E	RGS295162N0927529E	Active	Central	0.0114758	8.57677	9.42732	10.4651	3.54329e-05	4.86835e-05	6.48514e-05	5.17677	6.02732	7.06513	2.13866e-05	3.11256e-05	4.3782e-05	11.9768	12.8273	13.8651	4.94793e-05	6.62414e-05	8.59209e-05
RGU297972N0925108E	RGS295162N0927529E	Active	Central	0.0344603	18.2619	20.0729	22.2826	0.000226552	0.000311273	0.000414648	14.8619	16.6729	18.8826	0.000184372	0.000258549	0.000351379	21.6619	23.4729	25.6826	0.000268731	0.000363998	0.000477917
RGU297991N0925030E	RGS295880N0927252E	Active	Central	0.119796	17.8693	19.6414	21.8036	0.00077064	0.00105883	0.00141047	14.4693	16.2414	18.4036	0.00062401	0.000875542	0.00119053	21.2693	23.0414	25.2036	0.00091727	0.00124212	0.00163042
RGU298011N0925094E	RGS295880N0927252E	Active	Central	0.0486682	17.3214	19.0392	21.1352	0.000303481	0.000416971	0.000555449	13.9214	15.6392	17.7352	0.000243911	0.000342509	0.000466094	20.7214	22.4392	24.5352	0.000363051	0.000491434	0.000644804
RGU297991N0925193E	RGS295880N0927252E	Active	Central	0.201087	21.4249	23.5496	26.1421	0.00155098	0.00213098	0.00283869	18.0249	20.1496	22.7421	0.00130485	0.00182332	0.00246949	24.8249	26.9496	29.5421	0.00179711	0.00243864	0.00320788
RGU297697N0925199E	RGS294927N0928008E	Active	Central	0.0260607	18.2741	20.0864	22.2976	0.000171445	0.000235559	0.000313789	14.8741	16.6864	18.8976	0.000139547	0.000195686	0.000265942	21.6741	23.4864	25.6976	0.000203344	0.000275432	0.000361637
RGU297637N0925150E	RGS295797N0924470E	Active	Central	0.104027	20.3158	22.3305	24.7888	0.000760818	0.00104533	0.00139249	16.9158	18.9305	21.3888	0.00063349	0.000886174	0.0012015	23.7158	25.7305	28.1888	0.000888147	0.0012045	0.00158349
RGU298338N0925181E	RGS295797N0924470E	Active	Western	0.0402563	17.5299	19.2683	21.3895	0.000254048	0.000349052	0.000464973	14.1299	15.8683	17.9895	0.000204774	0.00028746	0.000391062	20.9299	22.6683	24.7895	0.000303321	0.000410644	0.000538883
RGU298290N0925209E	RGS295797N0924470E	Active	Central	0.0708478	21.5686	23.7075	26.3174	0.000550111	0.000755831	0.00100684	18.1686	20.3075	22.9174	0.000463393	0.000647434	0.000876768	24.9686	27.1075	29.7174	0.000636828	0.000864228	0.00113692
RGU298312N0925125E	RGS295797N0924470E	Active	Central	0.188409	22.6266	24.8704	27.6083	0.0015347	0.00210861	0.00280889	19.2266	21.4704	24.2083	0.00130408	0.00182035	0.00246297	26.0266	28.2704	31.0083	0.00176531	0.00239688	0.00315481
RGU294847N0925241E	RGS295797N0924470E	Active	Central	0.0286496	19.3621	21.2822	23.6251	0.000199698	0.000274378	0.0003655	15.9621	17.8822	20.2251	0.000164631	0.000230544	0.000312899	22.7621	24.6822	27.0251	0.000234766	0.000318212	0.000418101
RGU294826N0925222E	RGS295587N0928191E	Active	Western	0.0465941	16.7524	18.4137	20.4408	0.000281002	0.000386086	0.000514307	13.3524	15.0137	17.0408	0.000223971	0.000314797	0.00042876	20.1524	21.8137	23.8408	0.000338033	0.000457375	0.000599854
RGU298315N0924878E	RGS295234N0928651E	Active	Western	0.0632502	20.8845	22.9556	25.4827	0.000475541	0.000653375	0.000870362	17.4845	19.5556	22.0827	0.000398123	0.000556602	0.000754235	24.2845	26.3556	28.8827	0.000552959	0.000750147	0.00098649
RGU294771N0924974E	RGS296769N0924696E	Active	Central	0.0238875	20.0817	22.0731	24.5031	0.000172692	0.000237273	0.000316072	16.6817	18.6731	21.1031	0.000143454	0.000200725	0.000272214	23.4817	25.4731	27.9031	0.000201931	0.00027382	0.000359929
RGU294763N0925082E	RGS296769N0924696E	Active	Central	0.0263421	13.7321	15.0939	16.7555	0.000130223	0.000178922	0.000238343	10.3321	11.6939	13.3555	9.79807e-05	0.000138619	0.000189978	17.1321	18.4939	20.1555	0.000162466	0.000219225	0.000286707
RGU294919N0924924E	RGS295139N0929486E	Active	Central	0.0455516	15.3231	16.8427	18.6968	0.000251277	0.000345245	0.000459902	11.9231	13.4427	15.2968	0.000195522	0.000275551	0.000376269	18.7231	20.2427	22.0968	0.000307032	0.000414939	0.000543535
RGU294880N0925125E	RGS295139N0929486E	Active	Central	0.348228	22.3203	24.5338	27.2346	0.00279811	0.0038445	0.00512127	18.9203	21.1338	23.8346	0.00237188	0.00331171	0.00448193	25.7203	27.9338	30.6346	0.00322435	0.00437729	0.00576062
RGU295018N0924888E	RGS296991N0924744E	Active	Central	0.0131025	12.5337	13.7767	15.2933	5.91205e-05	8.12293e-05	0.000108206	9.13374	10.3767	11.8933	4.3083e-05	6.11825e-05	8.41496e-05	15.9337	17.1767	18.6933	7.5158e-05	0.000101276	0.000132262
RGU295287N0924815E	RGS296991N0924744E	Active	Central	0.0739065	15.5368	17.0775	18.9575	0.000413376	0.000567963	0.000756585	12.1368	13.6775	15.5575	0.000322915	0.000454886	0.000620893	18.9368	20.4775	22.3575	0.000503838	0.00068104	0.000892278
RGU294995N0924908E	RGS296991N0924744E	Active	Central	0.132168	26.1006	28.689	31.8472	0.00124188	0.00170629	0.00227295	22.7006	25.289	28.4472	0.0010801	0.00150407	0.00203029	29.5006	32.089	35.2472	0.00140365	0.00190851	0.00251561
RGU295062N0924943E	RGS296991N0924744E	Active	Central	0.0521303	19.3932	21.3164	23.663	0.00036395	0.000500053	0.000666122	15.9932	17.9164	20.263	0.000300142	0.000420294	0.000570411	22.7932	24.7164	27.063	0.000427757	0.000579812	0.000761834
RGU297110N0925121E	RGS294588N0926596E	Active	Central	0.0768983	19.037	20.9249	23.2285	0.000527009	0.000724091	0.000964563	15.637	17.5249	19.8285	0.000432886	0.000606436	0.000823378	22.437	24.3249	26.6285	0.000621133	0.000841745	0.00110575
RGU295008N0924956E	RGS294531N0926561E	Active	Central	0.0106284	17.243	18.953	21.0394	6.59757e-05	9.06481e-05	0.000120753	13.843	15.553	17.6394	5.29665e-05	7.43866e-05	0.000101239	20.643	22.353	24.4394	7.89849e-05	0.00010691	0.000140266
RGU294986N0924983E	RGS294531N0926561E	Active	Central	0.0168888	13.2896	14.6075	16.2156	8.08004e-05	0.000111017	0.000147886	9.8896	11.2075	12.8156	6.01285e-05	8.51767e-05	0.000116878	16.6896	18.0075	19.6156	0.000101472	0.000136856	0.000178893
RGU295104N0924981E	RGS294684N0927107E	Active	Central	0.024387	16.6866	18.3414	20.3606	0.000146497	0.000201282	0.000268128	13.2866	14.9414	16.9606	0.000116648	0.00016397	0.000223354	20.0866	21.7414	23.7606	0.000176347	0.000238594	0.000312903
RGU295012N0925038E	RGS294684N0927107E	Active	Central	0.025582	11.1987	12.3092	13.6643	0.000103134	0.000141703	0.000188763	7.79868	8.90924	10.2643	7.1822e-05	0.000102562	0.000141794	14.5987	15.7092	17.0643	0.000134447	0.000180843	0.000235731
RGU295043N0925030E	RGS294202N0927612E	Active	Central	0.0469001	15.1625	16.6662	18.5009	0.000256005	0.000351741	0.000468555	11.7625	13.2662	15.1009	0.000198599	0.000279984	0.000382447	18.5625	20.0662	21.9009	0.000313411	0.000423498	0.000554664
RGU295062N0925031E	RGS294202N0927612E	Active	Central	0.0323566	13.7666	15.1318	16.7976	0.000160359	0.000220327	0.000293498	10.3666	11.7318	13.3976	0.000120754	0.000170821	0.000234091	17.1666	18.5318	20.1976	0.000199963	0.000269832	0.000352905
RGU295072N0925032E	RGS294147N0928100E	Active	Central	0.0105173	14.3664	15.7911	17.5295	5.43946e-05	7.47361e-05	9.95562e-05	10.9664	12.3911	14.1295	4.15214e-05	5.86446e-05	8.02464e-05	17.7664	19.1911	20.9295	6.72678e-05	9.08276e-05	0.000118866
RGU295019N0925071E	RGS294147N0928100E	Active	Central	0.123064	20.4362	22.4629	24.9357	0.000905389	0.00124397	0.00165709	17.0362	19.0629	21.5357	0.000754758	0.00105568	0.00143115	23.8362	25.8629	28.3357	0.00105602	0.00143226	0.00188304
RGU295061N0925177E	RGS294147N0928100E	Active	Central	0.0942589	16.0391	17.6297	19.5704	0.000544257	0.000747789	0.000996132	12.6391	14.2297	16.1704	0.000428885	0.000603572	0.000823072	19.4391	21.0297	22.9704	0.00065963	0.000892005	0.00116919
RGU294970N0925186E	RGS294574N0928368E	Active	Central	0.0621851	13.6468	15.0001	16.6514	0.000305505	0.000419752	0.000559154	10.2468	11.6001	13.2514	0.000229391	0.000324609	0.000444982	17.0468	18.4001	20.0514	0.00038162	0.000514896	0.000673325
RGU295043N0925168E	RGS294574N0928368E	Active	Western	0.544526	19.5067	21.4412	23.8016	0.00382389	0.00525387	0.0069987	16.1067	18.0412	20.4016	0.00315739	0.00442075	0.00599896	22.9067	24.8412	27.2016	0.00449039	0.006087	0.00799845
RGU295033N0925193E	RGS294574N0928368E	Active	Central	0.341922	18.9866	20.8695	23.1669	0.0023371	0.00321108	0.00427749	15.5866	17.4695	19.7669	0.00191859	0.00268794	0.00364972	22.3866	24.2695	26.5669	0.00275561	0.00373422	0.00490526
RGU295013N0925228E	RGS294652N0928031E	Active	Central	0.168587	15.9312	17.5111	19.4388	0.000966886	0.00132846	0.00176965	12.5312	14.1111	16.0388	0.000760535	0.00107053	0.00146013	19.3312	20.9111	22.8388	0.00117324	0.0015864	0.00207918
RGU295119N0924868E	RGS294652N0928031E	Active	Central	0.24808	19.9126	21.8873	24.2968	0.00177837	0.00244341	0.00325487	16.5126	18.4873	20.8968	0.00147472	0.00206385	0.0027994	23.3126	25.2873	27.6968	0.00208202	0.00282297	0.00371035
RGU295175N0924938E	RGS294672N0928063E	Active	Central	0.116489	12.9767	14.2636	15.8338	0.000544193	0.0007477	0.000996013	9.57672	10.8636	12.4338	0.00040161	0.000569471	0.000782139	16.3767	17.6636	19.2338	0.000686775	0.000925928	0.00120989
RGU295243N0924978E	RGS294672N0928063E	Active	Central	0.273275	13.7433	15.1062	16.7692	0.00135205	0.00185766	0.0024746	10.3433	11.7062	13.3692	0.00101756	0.00143955	0.00197287	17.1433	18.5062	20.1692	0.00168654	0.00227577	0.00297633
RGU295360N0924934E	RGS293718N0928789E	Active	Central	0.0215831	10.8125	11.8848	13.1931	8.40124e-05	0.00011543	0.000153764	7.41253	8.4848	9.79315	5.75947e-05	8.24076e-05	0.000114138	14.2125	15.2848	16.5931	0.00011043	0.000148452	0.000193391
RGU295188N0925034E	RGS293718N0928789E	Active	Central	0.204609	12.9646	14.2503	15.819	0.00095496	0.00131208	0.00174782	9.56459	10.8503	12.419	0.000704519	0.000999027	0.00137216	16.3646	17.6503	19.219	0.0012054	0.00162513	0.00212349
RGU295185N0925061E	RGS292337N0926125E	Transitional	Western	0.55762	20.3048	22.3184	24.7754	0.00407606	0.00560034	0.00746024	16.9048	18.9184	21.3754	0.00339353	0.00474719	0.00643645	23.7048	25.7184	28.1754	0.00475858	0.0064535	0.00848403
RGU295381N0925266E	RGS292337N0926125E	Transitional	Central	0.168604	22.2209	24.4246	27.1134	0.00134875	0.00185313	0.00246856	18.8209	21.0246	23.7134	0.00114238	0.00159517	0.00215901	25.6209	27.8246	30.5134	0.00155512	0.00211109	0.00277812
RGU295128N0925285E	RGS292481N0925935E	Active	Central	0.0225375	9.33091	10.2562	11.3853	7.57063e-05	0.000104017	0.000138562	5.93091	6.85625	7.98532	4.81204e-05	6.95351e-05	9.71832e-05	12.7309	13.6562	14.7853	0.000103292	0.0001385	0.000179941
RGU295128N0925134E	RGS292481N0925935E	Active	Central	0.141663	11.9754	13.163	14.6121	0.00061073	0.000839119	0.00111779	8.57542	9.76301	11.2121	0.000437335	0.000622375	0.000857701	15.3754	16.563	18.0121	0.000784125	0.00105586	0.00137789
RGU295284N0925312E	RGS292575N0926062E	Active	Central	0.225956	14.5349	15.9763	17.7351	0.00118233	0.00162447	0.00216397	11.1349	12.5763	14.3351	0.000905759	0.00127876	0.00174911	17.9349	19.3763	21.1351	0.0014589	0.00197019	0.00257882
RGU295374N0925456E	RGS292575N0926062E	Transitional	Central	0.731206	20.4641	22.4935	24.9698	0.00538686	0.00740134	0.00985935	17.0641	19.0935	21.5698	0.00449187	0.00628259	0.00851685	23.8641	25.8935	28.3698	0.00628186	0.00852008	0.0112018
RGU295354N0925461E	RGS293131N0926660E	Active	Central	0.153005	14.7033	16.1614	17.9405	0.000809882	0.00111275	0.00148229	11.3033	12.7614	14.5405	0.000622604	0.000878649	0.00120138	18.1033	19.5614	21.3405	0.00099716	0.00134684	0.00176321
RGU295332N0925461E	RGS293131N0926660E	Active	Central	0.0511451	13.2946	14.613	16.2217	0.000244783	0.000336323	0.000448017	9.89461	11.213	12.8217	0.000182182	0.000258071	0.000354115	16.6946	18.013	19.6217	0.000307385	0.000414575	0.000541919
RGU295321N0925380E	RGS293131N0926660E	Active	Central	0.0972845	16.1863	17.7915	19.7501	0.000566883	0.000778876	0.00103754	12.7863	14.3915	16.3501	0.000447807	0.00063003	0.000858929	19.5863	21.1915	23.1501	0.00068596	0.000927721	0.00121616
RGU295393N0925376E	RGS292743N0927884E	Active	Central	0.028384	14.3986	15.8265	17.5688	0.000147129	0.000202149	0.000269283	10.9986	12.4265	14.1688	0.000112387	0.000158721	0.00021717	17.7986	19.2265	20.9688	0.000181871	0.000245577	0.000321396
RGU296094N0925189E	RGS292743N0927884E	Active	Central	0.0374083	16.477	18.111	20.1047	0.000221895	0.000304875	0.000406125	13.077	14.711	16.7047	0.000176107	0.00024764	0.000337443	19.877	21.511	23.5047	0.000267683	0.00036211	0.000474807
RGU295732N0925015E	RGS292743N0927884E	Active	Central	0.29871	20.2941	22.3067	24.7623	0.00218234	0.00299845	0.00399425	16.8941	18.9067	21.3623	0.00181672	0.00254143	0.00344582	23.6941	25.7067	28.1623	0.00254796	0.00345548	0.00454268
RGU295757N0925068E	RGS292481N0928202E	Transitional	Central	0.144136	17.7652	19.527	21.6766	0.00092182	0.00126654	0.00168717	14.3652	16.127	18.2766	0.000745397	0.00104602	0.00142253	21.1652	22.927	25.0766	0.00109824	0.00148707	0.0019518
RGU295921N0924899E	RGS292481N0928202E	Transitional	Central	0.082191	13.7308	15.0925	16.7539	0.000406277	0.000558209	0.000743593	10.3308	11.6925	13.3539	0.000305676	0.000432457	0.00059269	17.1308	18.4925	20.1539	0.000506879	0.000683962	0.000894495
RGU295892N0924927E	RGS292699N0928240E	Transitional	Central	0.0506005	19.8018	21.7655	24.1616	0.000360712	0.000495605	0.000660197	16.4018	18.3655	20.7616	0.000298778	0.000418186	0.000567295	23.2018	25.1655	27.5616	0.000422647	0.000573024	0.000753099
RGU295903N0925107E	RGS296026N0924845E	Active	Central	0.0594399	25.3393	27.8522	30.9183	0.00054222	0.00074499	0.000992403	21.9393	24.4522	27.5183	0.000469466	0.000654046	0.000883271	28.7393	31.2522	34.3183	0.000614975	0.000835933	0.00110153
RGU295907N0925076E	RGS298408N0930439E	Active	Central	0.0319393	13.4868	14.8242	16.4562	0.000155073	0.000213064	0.000283823	10.0868	11.4242	13.0562	0.000115979	0.000164197	0.000225183	16.8868	18.2242	19.8562	0.000194166	0.000261931	0.000342464
RGU295838N0924960E	RGS297463N0931006E	Active	Central	0.0555902	22.7219	24.9752	27.7246	0.00045472	0.000624768	0.000832256	19.3219	21.5752	24.3246	0.000386678	0.000539715	0.000730192	26.1219	28.3752	31.1246	0.000522763	0.000709821	0.00093432
RGU295958N0925210E	RGS297463N0931006E	Active	Central	0.0259094	11.5778	12.726	14.1269	0.000107991	0.000148375	0.000197651	8.17783	9.32599	10.7269	7.62776e-05	0.000108734	0.000150081	14.9778	16.126	17.5269	0.000139704	0.000188016	0.00024522
RGU296022N0925109E	RGS297463N0931006E	Transitional	Central	0.230729	15.222	16.7316	18.5735	0.00126438	0.00173721	0.00231414	11.822	13.3316	15.1735	0.000981965	0.00138419	0.00189052	18.622	20.1316	21.9735	0.00154679	0.00209022	0.00273775
RGU296053N0925123E	RGS297430N0930873E	Transitional	Central	0.048578	10.6017	11.653	12.9358	0.000185402	0.000254736	0.000339334	7.20165	8.25301	9.53584	0.000125943	0.000180411	0.000250145	14.0017	15.053	16.3358	0.000244862	0.00032906	0.000428523
RGU296054N0925225E	RGS296375N0924652E	Active	Central	0.0215651	10.8887	11.9685	13.286	8.45333e-05	0.000116145	0.000154718	7.48865	8.56847	9.88603	5.81376e-05	8.31509e-05	0.000115124	14.2887	15.3685	16.686	0.000110929	0.00014914	0.000194311
RGU295999N0925218E	RGS296375N0924652E	Active	Central	0.0256297	12.1701	13.377	14.8496	0.00011229	0.000154282	0.000205519	8.77009	9.97698	11.4496	8.0919e-05	0.000115068	0.000158463	15.5701	16.777	18.2496	0.000143661	0.000193495	0.000252576
RGU296078N0925182E	RGS296375N0924652E	Active	Central	0.0251564	13.3932	14.7214	16.342	0.000121292	0.000166651	0.000221997	9.99318	11.3214	12.942	9.05011e-05	0.000128162	0.00017581	16.7932	18.1214	19.742	0.000152084	0.00020514	0.000268184
RGU295707N0925176E	RGS296375N0924652E	Active	Central	0.055654	25.6515	28.1953	31.2992	0.000513939	0.000706132	0.000940641	22.2515	24.7953	27.8992	0.000445818	0.000620981	0.00083846	29.0515	31.5953	34.6992	0.000582059	0.000791283	0.00104282
RGU296096N0925018E	RGS296375N0924652E	Transitional	Central	0.0117797	21.2894	23.4007	25.9768	9.02816e-05	0.000124043	0.000165239	17.8894	20.0007	22.5768	7.58633e-05	0.000106021	0.000143611	24.6894	26.8007	29.3768	0.0001047	0.000142066	0.000186866
RGU296065N0924902E	RGS296375N0924652E	Active	Central	0.0155329	27.2456	29.9475	33.2443	0.000152352	0.000209326	0.000278844	23.8456	26.5475	29.8443	0.00013334	0.000185561	0.000250326	30.6456	33.3475	36.6443	0.000171365	0.000233092	0.000307363
RGU296042N0924913E	RGS296375N0924652E	Transitional	Central	0.0362784	29.2011	32.0969	35.6304	0.000381373	0.000523992	0.000698011	25.8011	28.6969	32.2304	0.000336968	0.000468486	0.000631404	32.6011	35.4969	39.0304	0.000425778	0.000579498	0.000764619
RGU296061N0924947E	RGS295571N0929648E	Active	Central	0.204747	18.3486	20.1683	22.3885	0.00135246	0.00185823	0.00247535	14.9486	16.7683	18.9885	0.00110185	0.00154496	0.00209943	21.7486	23.5683	25.7885	0.00160307	0.00217149	0.00285127
RGU296041N0924930E	RGS296073N0930101E	Active	Central	0.0245653	21.9592	24.1368	26.794	0.000194196	0.000266818	0.000355429	18.5592	20.7368	23.394	0.000164128	0.000229233	0.000310327	25.3592	27.5368	30.194	0.000224264	0.000304403	0.000400531
RGU296124N0924900E	RGS296433N0930206E	Active	Central	0.183897	16.2479	17.8592	19.8252	0.00107566	0.00147792	0.00196874	12.8479	14.4592	16.4252	0.00085057	0.00119655	0.0016311	19.6479	21.2592	23.2252	0.00130075	0.00175928	0.00230637
RGU296138N0924888E	RGS296433N0930206E	Active	Central	0.0629369	21.5931	23.7345	26.3473	0.000489241	0.000672199	0.000895438	18.1931	20.3345	22.9473	0.000412207	0.000575905	0.000779886	24.9931	27.1345	29.7473	0.000566276	0.000768492	0.00101099
RGU296303N0924904E	RGS297084N0929940E	Active	Central	0.0216958	14.4759	15.9114	17.663	0.000113063	0.000155345	0.000206935	11.0759	12.5114	14.263	8.65078e-05	0.00012215	0.000167102	17.8759	19.3114	21.063	0.000139619	0.000188539	0.000246769
RGU296045N0924885E	RGS297084N0929940E	Active	Central	0.0265398	17.9616	19.7428	21.9163	0.000171611	0.000235787	0.000314093	14.5616	16.3428	18.5163	0.000139126	0.000195181	0.000265365	21.3616	23.1428	25.3163	0.000204096	0.000276393	0.00036282
RGU296015N0924867E	RGS297084N0929940E	Active	Central	0.0227369	11.2571	12.3734	13.7356	9.21424e-05	0.0001266	0.000168644	7.85706	8.97341	10.3356	6.43124e-05	9.18125e-05	0.000126899	14.6571	15.7734	17.1356	0.000119972	0.000161388	0.000210389
RGU296047N0924813E	RGS296944N0929817E	Active	Central	0.019662	9.65128	10.6084	11.7762	6.83149e-05	9.38621e-05	0.000125034	6.25128	7.20839	8.37623	4.42486e-05	6.37792e-05	8.89345e-05	13.0513	14.0084	15.1762	9.23812e-05	0.000123945	0.000161133
RGU296025N0924760E	RGS296944N0929817E	Active	Central	0.0304555	13.0742	14.3708	15.9528	0.000143345	0.000196951	0.000262359	9.67423	10.9708	12.5528	0.000106068	0.000150354	0.000206443	16.4742	17.7708	19.3528	0.000180623	0.000243548	0.000318276
RGU296039N0924734E	RGS296064N0929804E	Active	Central	0.0868795	20.0438	22.0315	24.4569	0.000626902	0.000861339	0.00114739	16.6438	18.6315	21.0569	0.000520561	0.000728413	0.000987882	23.4438	25.4315	27.8569	0.000733242	0.000994265	0.0013069
RGU296807N0925459E	RGS294782N0930245E	Transitional	Central	0.131404	10.8877	11.9674	13.2848	0.000515045	0.000707652	0.000942665	7.48768	8.5674	9.88485	0.000354207	0.000506604	0.000701408	14.2877	15.3674	16.6848	0.000675883	0.000908699	0.00118392
RGU296827N0925450E	RGS294782N0930245E	Active	Central	0.0753609	14.8863	16.3625	18.1638	0.000403864	0.000554893	0.000739175	11.4863	12.9625	14.7638	0.000311622	0.000439591	0.000600813	18.2863	19.7625	21.5638	0.000496106	0.000670195	0.000877538
RGU296734N0925525E	RGS294869N0930353E	Active	Central	0.0534544	17.5821	19.3257	21.4532	0.000338343	0.00046487	0.000619255	14.1821	15.9257	18.0532	0.000272915	0.000383085	0.000521112	20.9821	22.7257	24.8532	0.000403771	0.000546655	0.000717397
RGU297314N0925282E	RGS294869N0930353E	Active	Central	0.0624891	10.3177	11.3409	12.5894	0.000232108	0.000318908	0.000424818	6.91774	7.94093	9.18941	0.000155622	0.0002233	0.000310088	13.7177	14.7409	15.9894	0.000308595	0.000414516	0.000539548
RGU298099N0925405E	RGS296667N0925107E	Active	Central	0.183715	26.6067	29.2453	32.4648	0.0017597	0.00241776	0.0032207	23.2067	25.8453	29.0648	0.00153483	0.00213667	0.0028834	30.0067	32.6453	35.8648	0.00198457	0.00269884	0.003558
RGU298167N0925524E	RGS296667N0925107E	Active	Central	0.0594774	18.2229	20.0301	22.2351	0.000390187	0.000536102	0.000714143	14.8229	16.6301	18.8351	0.000317387	0.000445101	0.000604943	21.6229	23.4301	25.6351	0.000462987	0.000627102	0.000823344
RGU298153N0925540E	RGS296091N0930598E	Transitional	Central	0.499627	20.4701	22.5002	24.9771	0.00368188	0.00505876	0.00673879	17.0701	19.1002	21.5771	0.00307034	0.00429433	0.00582148	23.8701	25.9002	28.3771	0.00429342	0.00582319	0.00765611
RGU298157N0925534E	RGS296798N0925066E	Active	Central	0.232576	24.8028	27.2625	30.2637	0.00207667	0.00285326	0.00380084	21.4028	23.8625	26.8637	0.001792	0.00249742	0.00337383	28.2028	30.6625	33.6637	0.00236134	0.0032091	0.00422785
RGU298155N0925520E	RGS296798N0925066E	Active	Central	0.0491787	11.4731	12.6108	13.9991	0.000203123	0.000279083	0.000371767	8.07307	9.21085	10.5991	0.000142928	0.00020384	0.000281475	14.8731	16.0108	17.3991	0.000263318	0.000354326	0.000462059
RGU298138N0925538E	RGS296798N0925066E	Active	Central	0.0819126	14.9533	16.4363	18.2457	0.000440952	0.000605851	0.000807057	11.5533	13.0363	14.8457	0.000340691	0.000480525	0.000656665	18.3533	19.8363	21.6457	0.000541213	0.000731178	0.000957448
RGU298113N0925536E	RGS296280N0930294E	Active	Central	0.107345	19.4051	21.3295	23.6776	0.000749897	0.00103033	0.00137251	16.0051	17.9295	20.2776	0.000618506	0.000866091	0.00117542	22.8051	24.7295	27.0776	0.000881288	0.00119457	0.00156959
RGU298099N0925532E	RGS296280N0930294E	Active	Central	0.280095	20.5074	22.5411	25.0226	0.00206785	0.00284114	0.0037847	17.1074	19.1411	21.6226	0.00172501	0.0024126	0.00327044	23.9074	25.9411	28.4226	0.00241069	0.00326969	0.00429895
RGU297042N0925521E	RGS296570N0930336E	Active	Central	0.0431703	20.8758	22.946	25.4721	0.000324437	0.000445764	0.000593804	17.4758	19.546	22.0721	0.000271597	0.000379713	0.000514543	24.2758	26.346	28.8721	0.000377278	0.000511814	0.000673064
RGU297274N0925489E	RGS296570N0930336E	Active	Central	0.0113427	13.8388	15.2112	16.8858	5.65091e-05	7.76413e-05	0.000103426	10.4388	11.8112	13.4858	4.26256e-05	6.0287e-05	8.2601e-05	17.2388	18.6112	20.2858	7.03925e-05	9.49956e-05	0.000124251
RGU297097N0925415E	RGS296750N0925250E	Transitional	Central	0.0662301	17.6355	19.3844	21.5183	0.00042048	0.000577723	0.000769587	14.2355	15.9844	18.1183	0.000339415	0.000476391	0.000647989	21.0355	22.7844	24.9183	0.000501546	0.000679055	0.000891186
RGU296920N0925619E	RGS296750N0925250E	Transitional	Central	0.266648	24.2232	26.6254	29.5565	0.00232527	0.00319484	0.00425585	20.8232	23.2254	26.1565	0.0019989	0.00278686	0.00376628	27.6232	30.0254	32.9565	0.00265165	0.00360281	0.00474542
RGU296895N0925616E	RGS296750N0925250E	Active	Central	0.0317334	18.0131	19.7995	21.9791	0.000205782	0.000282737	0.000376634	14.6131	16.3995	18.5791	0.00016694	0.000234185	0.000318372	21.4131	23.1995	25.3791	0.000244624	0.000331289	0.000434897
RGU296871N0925608E	RGS296918N0930299E	Active	Central	0.103381	19.1215	21.0177	23.3315	0.000711646	0.000977774	0.0013025	15.7215	17.6177	19.9315	0.000585108	0.000819601	0.00111269	22.5215	24.4177	26.7315	0.000838184	0.00113595	0.0014923
RGU296921N0925498E	RGS296918N0930299E	Active	Central	0.0340331	13.5534	14.8975	16.5375	0.000166055	0.000228154	0.000303924	10.1534	11.4975	13.1375	0.000124399	0.000176083	0.00024144	16.9534	18.2975	19.9375	0.000207712	0.000280224	0.000366409
RGU296907N0925841E	RGS296918N0930299E	Active	Central	0.0396506	13.2838	14.6011	16.2085	0.000189615	0.000260524	0.000347044	9.88375	11.2011	12.8085	0.000141083	0.000199858	0.000274246	16.6838	18.0011	19.6085	0.000238147	0.000321189	0.000419843
RGU296896N0925751E	RGS296822N0930289E	Active	Central	0.0694892	12.2735	13.4907	14.9758	0.000307036	0.000421855	0.000561955	8.87352	10.0907	11.5758	0.000221981	0.000315537	0.000434373	15.6735	16.8907	18.3758	0.000392091	0.000528174	0.000689537
RGU296679N0925719E	RGS296822N0930289E	Active	Central	0.0674155	34.5036	37.9253	42.1004	0.000837389	0.00115054	0.00153264	31.1036	34.5253	38.7004	0.000754872	0.00104739	0.00140886	37.9036	41.3253	45.5004	0.000919906	0.00125369	0.00165641
RGU297666N0925293E	RGS296822N0930289E	Active	Central	0.0484201	13.3458	14.6693	16.2842	0.000232634	0.00031963	0.000425781	9.94581	11.2693	12.8842	0.000173368	0.000245548	0.000336881	16.7458	18.0693	19.6842	0.0002919	0.000393713	0.00051468
RGU297273N0925354E	RGS296039N0930706E	Transitional	Central	0.0686222	17.1235	18.8217	20.8937	0.00042302	0.000581213	0.000774236	13.7235	15.4217	17.4937	0.000339026	0.000476221	0.000648245	20.5235	22.2217	24.2937	0.000507013	0.000686205	0.000900226
RGU297892N0925592E	RGS296039N0930706E	Transitional	Central	0.302741	25.559	28.0937	31.1864	0.0027856	0.0038273	0.00509837	22.159	24.6937	27.7864	0.00241504	0.00336411	0.00454253	28.959	31.4937	34.5864	0.00315615	0.0042905	0.0056542
RGU298366N0925247E	RGS296059N0931016E	Transitional	Central	0.210403	23.1995	25.5002	28.3074	0.00175725	0.00241439	0.00321622	19.7995	22.1002	24.9074	0.00149972	0.00209248	0.00282992	26.5995	28.9002	31.7074	0.00201478	0.00273631	0.00360252
RGU298273N0925494E	RGS296059N0931016E	Transitional	Central	0.0486324	19.7449	21.703	24.0922	0.000345686	0.00047496	0.000632696	16.3449	18.303	20.6922	0.00028616	0.000400552	0.000543407	23.1449	25.103	27.4922	0.000405213	0.000549367	0.000721985
RGU298207N0925634E	RGS296569N0930666E	Transitional	Central	0.0123214	10.6666	11.7243	13.015	4.73136e-05	6.50071e-05	8.65962e-05	7.26656	8.32435	9.61504	3.22323e-05	4.61554e-05	6.39741e-05	14.0666	15.1243	16.415	6.2395e-05	8.38588e-05	0.000109218
RGU298144N0925288E	RGS296569N0930666E	Transitional	Central	0.0798488	20.6583	22.707	25.2067	0.000593835	0.000815906	0.00108687	17.2583	19.307	21.8067	0.0004961	0.000693737	0.000940269	24.0583	26.107	28.6067	0.00069157	0.000938075	0.00123347
RGU295723N0925536E	RGS296539N0930814E	Transitional	Central	0.0410996	17.6251	19.373	21.5057	0.000260779	0.0003583	0.000477293	14.2251	15.973	18.1057	0.000210473	0.000295418	0.000401834	21.0251	22.773	24.9057	0.000311085	0.000421183	0.000552752
RGU295529N0925337E	RGS296539N0930814E	Active	Central	0.069239	15.7412	17.3023	19.207	0.000392367	0.000539097	0.000718133	12.3412	13.9023	15.807	0.000307618	0.000433161	0.00059101	19.1412	20.7023	22.607	0.000477116	0.000645033	0.000845256
RGU295559N0925201E	RGS296549N0930862E	Active	Central	0.0190325	17.6688	19.421	21.559	0.000121061	0.000166333	0.000221573	14.2688	16.021	18.159	9.77655e-05	0.000137214	0.00018663	21.0688	22.821	24.959	0.000144357	0.000195453	0.000256517
RGU295574N0925463E	RGS297829N0925098E	Active	Central	0.152515	19.0051	20.8898	23.1895	0.00104348	0.0014337	0.00190984	15.6051	17.4898	19.7895	0.000856804	0.00120036	0.00162983	22.4051	24.2898	26.5895	0.00123016	0.00166705	0.00218986
RGU295482N0925531E	RGS297829N0925098E	Active	Central	0.113875	15.9404	17.5212	19.4501	0.000653477	0.000897852	0.00119603	12.5404	14.1212	16.0501	0.000514094	0.000723624	0.000986957	19.3404	20.9212	22.8501	0.000792859	0.00107208	0.00140511
RGU295407N0925518E	RGS297829N0925098E	Active	Central	0.335977	18.2432	20.0524	22.2599	0.00220655	0.00303171	0.00403855	14.8432	16.6524	18.8599	0.00179531	0.00251767	0.0034217	21.6432	23.4524	25.6599	0.00261778	0.00354575	0.0046554
RGU295281N0925372E	RGS297829N0925098E	Active	Central	0.175152	15.697	17.2536	19.153	0.000989767	0.0013599	0.00181153	12.297	13.8536	15.753	0.000775381	0.00109192	0.00148995	19.097	20.6536	22.553	0.00120415	0.00162788	0.00213311
RGU295263N0925403E	RGS297829N0925098E	Active	Central	0.0606507	16.7381	18.398	20.4234	0.000365464	0.000502134	0.000668894	13.3381	14.998	17.0234	0.000291228	0.000409338	0.00055754	20.1381	21.798	23.8234	0.000439701	0.00059493	0.000780249
RGU295446N0925557E	RGS296605N0930992E	Transitional	Central	0.193801	16.1384	17.7389	19.6917	0.00112595	0.00154701	0.00206078	12.7384	14.3389	16.2917	0.000888739	0.0012505	0.00170496	19.5384	21.1389	23.0917	0.00136316	0.00184353	0.0024166
RGU295952N0925596E	RGS296605N0930992E	Transitional	Central	0.0257284	15.7786	17.3433	19.2526	0.000146145	0.000200797	0.000267482	12.3786	13.9433	15.8526	0.000114653	0.000161433	0.000220245	19.1786	20.7433	22.6526	0.000177636	0.000240161	0.00031472
RGU295324N0925680E	RGS296907N0930891E	Transitional	Central	0.0644482	24.7798	27.2372	30.2356	0.000574926	0.000789925	0.00105226	21.3798	23.8372	26.8356	0.000496041	0.00069132	0.000933935	28.1798	30.6372	33.6356	0.00065381	0.000888531	0.00117059
RGU295291N0925628E	RGS296907N0930891E	Active	Central	0.0666084	22.9293	25.2032	27.9777	0.000549823	0.000755435	0.00100632	19.5293	21.8032	24.5777	0.000468294	0.000653525	0.000884025	26.3293	28.6032	31.3777	0.000631352	0.000857346	0.00112861
RGU295314N0925602E	RGS296907N0930891E	Transitional	Central	0.412716	23.4767	25.8048	28.6456	0.00348811	0.00479253	0.00638414	20.0767	22.4048	25.2456	0.00298295	0.00416107	0.0056264	26.8767	29.2048	32.0456	0.00399327	0.00542398	0.00714189
RGU295265N0925697E	RGS296907N0930891E	Transitional	Central	0.0187059	19.0594	20.9495	23.2558	0.000128349	0.000176346	0.000234911	15.6594	17.5495	19.8558	0.000105453	0.000147726	0.000200567	22.4594	24.3495	26.6558	0.000151245	0.000204966	0.000269255
RGU295233N0925539E	RGS296980N0930953E	Transitional	Central	0.044092	18.3366	20.155	22.3738	0.000291059	0.000399903	0.000532712	14.9366	16.755	18.9738	0.00023709	0.000332443	0.00045176	21.7366	23.555	25.7738	0.000345027	0.000467364	0.000613665
RGU295092N0925690E	RGS297086N0930804E	Transitional	Central	0.213687	17.6727	19.4253	21.5637	0.00135952	0.00186792	0.00248827	14.2727	16.0253	18.1637	0.00109796	0.00154098	0.00209594	21.0727	22.8253	24.9637	0.00162107	0.00219486	0.0028806
RGU294898N0925425E	RGS297086N0930804E	Transitional	Central	0.0581021	35.4632	38.98	43.2712	0.000741774	0.00101917	0.00135764	32.0632	35.58	39.8712	0.000670657	0.000930273	0.00125096	38.8632	42.38	46.6712	0.000812891	0.00110807	0.00146431
RGU294842N0925454E	RGS295100N0930770E	Transitional	Central	0.0796655	16.5176	18.1557	20.1544	0.000473719	0.000650871	0.000867028	13.1176	14.7557	16.7544	0.000376208	0.000528983	0.000720762	19.9176	21.5557	23.5544	0.000571229	0.00077276	0.00101329
RGU294851N0925439E	RGS295100N0930770E	Transitional	Central	0.0354873	19.3321	21.2492	23.5885	0.000246975	0.000339334	0.000452029	15.9321	17.8492	20.1885	0.000203539	0.000285039	0.000386874	22.7321	24.6492	26.9885	0.000290412	0.00039363	0.000517183
RGU294919N0925308E	RGS298328N0925182E	Transitional	Central	0.0353634	11.1424	12.2474	13.5957	0.000141852	0.0001949	0.000259626	7.74242	8.84741	10.1957	9.85675e-05	0.000140794	0.000194699	14.5424	15.6474	16.9957	0.000185137	0.000249006	0.000324554
RGU294691N0925370E	RGS295299N0931128E	Transitional	Central	0.246585	16.5789	18.223	20.2291	0.00147172	0.00202208	0.00269362	13.1789	14.823	16.8291	0.0011699	0.00164481	0.00224089	19.9789	21.623	23.6291	0.00177354	0.00239936	0.00314635
RGU294724N0925553E	RGS295393N0931237E	Transitional	Central	0.0687727	16.2749	17.8888	19.8581	0.000402936	0.000553618	0.000737477	12.8749	14.4888	16.4581	0.000318758	0.000448396	0.00061121	19.6749	21.2888	23.2581	0.000487114	0.000658841	0.000863744
RGU295928N0925302E	RGS295393N0931237E	Transitional	Central	0.0842012	15.4852	17.0209	18.8946	0.000469394	0.000644929	0.000859112	12.0852	13.6209	15.4946	0.000366332	0.000516101	0.000704519	18.8852	20.4209	22.2946	0.000572456	0.000773757	0.00101371
RGU295966N0924756E	RGS295399N0931144E	Transitional	Central	0.553624	15.2243	16.7341	18.5763	0.00303428	0.00416898	0.00555351	11.8243	13.3341	15.1763	0.00235664	0.00332193	0.00453705	18.6243	20.1341	21.9763	0.00371191	0.00501602	0.00656996
RGU295734N0925280E	RGS295399N0931144E	Active	Central	0.0104092	28.8989	31.7647	35.2616	0.000108293	0.00014879	0.000198204	25.4989	28.3647	31.8616	9.55521e-05	0.000132864	0.000179093	32.2989	35.1647	38.6616	0.000121034	0.000164716	0.000217315
RGU295790N0925408E	RGS295399N0931144E	Active	Central	0.0847355	11.0062	12.0977	13.4294	0.000335741	0.000461295	0.000614493	7.60618	8.69765	10.0294	0.000232025	0.00033165	0.000458919	14.4062	15.4977	16.8294	0.000439458	0.000590941	0.000770068
RGU295799N0925464E	RGS295399N0931144E	Active	Central	0.209428	15.7101	17.268	19.169	0.00118445	0.00162739	0.00216785	12.3101	13.868	15.769	0.000928107	0.00130696	0.00178333	19.1101	20.668	22.569	0.00144079	0.00194781	0.00255236
RGU295794N0925302E	RGS294787N0924993E	Active	Central	0.217911	18.8958	20.7697	23.0561	0.00148234	0.00203667	0.00271306	15.4958	17.3697	19.6561	0.00121561	0.00170327	0.00231298	22.2958	24.1697	26.4561	0.00174906	0.00237008	0.00311314
RGU295850N0925417E	RGS294787N0924993E	Active	Central	0.016047	12.0983	13.298	14.762	6.98909e-05	9.60274e-05	0.000127918	8.69827	9.89805	11.362	5.02493e-05	7.14754e-05	9.84561e-05	15.4983	16.698	18.162	8.95325e-05	0.000120579	0.000157381
RGU295810N0925404E	RGS294787N0924993E	Active	Central	0.226077	23.4659	25.793	28.6325	0.00190983	0.00262404	0.00349549	20.0659	22.393	25.2325	0.00163312	0.00227814	0.00308041	26.8659	29.193	32.0325	0.00218655	0.00296994	0.00391057
RGU295855N0925392E	RGS295863N0931175E	Active	Central	0.559384	19.4519	21.3809	23.7346	0.00391719	0.00538207	0.00716947	16.0519	17.9809	20.3346	0.0032325	0.00452621	0.00614244	22.8519	24.7809	27.1346	0.00460187	0.00623792	0.0081965
RGU295824N0925427E	RGS295863N0931175E	Active	Central	0.0412132	12.7308	13.9932	15.5337	0.000188883	0.000259518	0.000345705	9.33075	10.5932	12.1337	0.000138438	0.000196462	0.000270037	16.1308	17.3932	18.9337	0.000239328	0.000322574	0.000421372
RGU295815N0925441E	RGS295777N0931045E	Active	Central	0.200496	19.9228	21.8986	24.3093	0.001438	0.00197576	0.00263192	16.5228	18.4986	20.9093	0.0011926	0.001669	0.00226381	23.3228	25.2986	27.7093	0.00168341	0.00228252	0.00300003
RGU295954N0925503E	RGS295777N0931045E	Active	Central	0.0853548	15.3257	16.8455	18.6999	0.000470923	0.00064703	0.00086191	11.9257	13.4455	15.2999	0.000366448	0.000516437	0.000705199	18.7257	20.2455	22.0999	0.000575397	0.000777622	0.00101862
RGU295945N0925421E	RGS296350N0931612E	Active	Central	0.0256009	17.0324	18.7215	20.7824	0.000156976	0.000215679	0.000287306	13.6324	15.3215	17.3824	0.00012564	0.000176509	0.000240303	20.4324	22.1215	24.1824	0.000188311	0.000254848	0.00033431
RGU296014N0925355E	RGS296350N0931612E	Transitional	Central	0.0269282	17.2443	18.9544	21.041	0.000167169	0.000229684	0.000305962	13.8443	15.5544	17.641	0.000134209	0.000188483	0.000256522	20.6443	22.3544	24.441	0.000200129	0.000270884	0.000355403
RGU296083N0925568E	RGS296350N0931612E	Transitional	Central	0.103531	20.5491	22.5869	25.0734	0.00076589	0.0010523	0.00140178	17.1491	19.1869	21.6734	0.000639168	0.000893901	0.00121169	23.9491	25.9869	28.4734	0.000892613	0.00121071	0.00159186
RGU296125N0925588E	RGS295934N0931466E	Transitional	Central	0.0481659	17.1644	18.8666	20.9436	0.000297626	0.000408927	0.000544733	13.7644	15.4666	17.5436	0.000238671	0.000335233	0.000456301	20.5644	22.2666	24.3436	0.000356581	0.000482621	0.000633166
RGU296234N0925611E	RGS295048N0925034E	Active	Central	0.0796606	14.4346	15.8661	17.6128	0.000413954	0.000568757	0.000757643	11.0346	12.4661	14.2128	0.00031645	0.000446876	0.000611387	17.8346	19.2661	21.0128	0.000511459	0.000690638	0.0009039
RGU296139N0925497E	RGS295048N0925034E	Active	Central	0.102519	16.2359	17.846	19.8106	0.000599215	0.000823298	0.00109672	12.8359	14.446	16.4106	0.000473732	0.000666445	0.000908494	19.6359	21.246	23.2106	0.000724698	0.000980151	0.00128494
RGU296247N0925543E	RGS295048N0925034E	Active	Central	0.0465294	16.8495	18.5205	20.5593	0.000282239	0.000387786	0.000516571	13.4495	15.1205	17.1593	0.000225287	0.000316596	0.000431143	20.2495	21.9205	23.9593	0.000339191	0.000458976	0.000601999
RGU295606N0924708E	RGS295048N0925034E	Active	Central	0.0649516	17.8849	19.6585	21.8226	0.000418194	0.000574583	0.000765404	14.4849	16.2585	18.4226	0.000338694	0.000475207	0.000646152	21.2849	23.0585	25.2226	0.000497695	0.000673959	0.000884655
RGU296212N0925391E	RGS296512N0931891E	Active	Central	0.196796	15.3545	16.8772	18.7351	0.00108781	0.00149461	0.00199098	11.9545	13.4772	15.3351	0.000846935	0.00119352	0.00162966	18.7545	20.2772	22.1351	0.00132869	0.00179571	0.0023523
RGU296310N0925436E	RGS296369N0932034E	Active	Central	0.0152585	16.843	18.5133	20.5514	9.25194e-05	0.000127118	0.000169334	13.443	15.1133	17.1514	7.38431e-05	0.000103773	0.00014132	20.243	21.9133	23.9514	0.000111196	0.000150464	0.000197349
RGU296147N0925316E	RGS296369N0932034E	Active	Central	0.163016	18.5307	20.3684	22.6106	0.00108749	0.00149417	0.00199039	15.1307	16.9684	19.2106	0.000887957	0.00124475	0.00169109	21.9307	23.7684	26.0106	0.00128702	0.00174358	0.00228968
RGU296717N0925745E	RGS295034N0925196E	Active	Central	0.150393	16.9217	18.5998	20.6474	0.000916169	0.00125878	0.00167683	13.5217	15.1998	17.2474	0.000732088	0.00102868	0.0014007	20.3217	21.9998	24.0474	0.00110025	0.00148888	0.00195295
RGU298171N0925813E	RGS295034N0925196E	Active	Central	0.0612859	19.7841	21.746	24.14	0.000436495	0.000599727	0.000798898	16.3841	18.346	20.74	0.000361481	0.000505959	0.000686377	23.1841	25.146	27.54	0.000511508	0.000693494	0.000911419
RGU298170N0925803E	RGS295034N0925196E	Active	Central	0.0702402	21.182	23.2826	25.8457	0.000535619	0.00073592	0.000980322	17.782	19.8826	22.4457	0.000449645	0.000628453	0.000851361	24.582	26.6826	29.2457	0.000621593	0.000843388	0.00110928
RGU298161N0925799E	RGS295796N0932721E	Active	Central	0.310772	20.1754	22.1762	24.6175	0.00225719	0.00310129	0.00413123	16.7754	18.7762	21.2175	0.0018768	0.0026258	0.00356065	23.5754	25.5762	28.0175	0.00263757	0.00357677	0.00470181
RGU298165N0925794E	RGS295796N0932721E	Active	Central	0.114484	12.1625	13.3686	14.8403	0.000501265	0.000688719	0.000917445	8.76247	9.96861	11.4403	0.000361137	0.000513559	0.000707253	15.5625	16.7686	18.2403	0.000641393	0.000863879	0.00112764
RGU298160N0925776E	RGS291536N0929737E	Active	Central	0.0424626	13.9302	15.3116	16.9972	0.000212944	0.000292577	0.000389742	10.5302	11.9116	13.5972	0.00016097	0.000227609	0.000311781	17.3302	18.7116	20.3972	0.000264918	0.000357544	0.000467704
RGU298167N0925783E	RGS291536N0929737E	Active	Central	0.0551514	15.1748	16.6796	18.5158	0.000301288	0.000413958	0.000551434	11.7748	13.2796	15.1158	0.000233782	0.000329576	0.000450176	18.5748	20.0796	21.9158	0.000368793	0.000498339	0.000652692
RGU298165N0925757E	RGS295188N0925054E	Active	Central	0.0418657	15.1538	16.6565	18.4902	0.000228392	0.000313802	0.000418017	11.7538	13.2565	15.0902	0.000177149	0.000249747	0.000341151	18.5538	20.0565	21.8902	0.000279636	0.000377856	0.000494882
RGU298274N0925782E	RGS295188N0925054E	Active	Central	0.0492762	24.7361	27.1892	30.1823	0.000438805	0.000602901	0.000803126	21.3361	23.7892	26.7823	0.000378491	0.000527508	0.000712655	28.1361	30.5892	33.5823	0.000499119	0.000678293	0.000893597
RGU298229N0925796E	RGS295144N0925123E	Active	Central	0.138551	18.3217	20.1386	22.3556	0.000913852	0.0012556	0.00167258	14.9217	16.7386	18.9556	0.000744266	0.00104361	0.00141821	21.7217	23.5386	25.7556	0.00108344	0.00146758	0.00192696
RGU298381N0925755E	RGS295144N0925123E	Transitional	Central	0.59199	14.4085	15.8374	17.5808	0.00307069	0.00421901	0.00562015	11.0085	12.4374	14.1808	0.00234609	0.00331326	0.00453326	17.8085	19.2374	20.9808	0.00379528	0.00512475	0.00670705
RGU297562N0925798E	RGS295144N0925123E	Transitional	Central	0.0187942	15.6975	17.2542	19.1537	0.000106208	0.000145926	0.000194388	12.2975	13.8542	15.7537	8.3204e-05	0.000117171	0.000159882	19.0975	20.6542	22.5537	0.000129212	0.000174681	0.000228895
RGU297555N0925863E	RGS292134N0930278E	Transitional	Central	0.136193	20.7326	22.7887	25.2974	0.00101651	0.00139664	0.00186047	17.3326	19.3887	21.8974	0.000849808	0.00118827	0.00161042	24.1326	26.1887	28.6974	0.00118321	0.00160502	0.00211052
RGU297603N0925828E	RGS292193N0931834E	Active	Central	0.135216	12.2	13.4099	14.8861	0.000593871	0.000815955	0.00108694	8.80003	10.0099	11.4861	0.000428366	0.000609075	0.00083868	15.6	16.8099	18.2861	0.000759375	0.00102284	0.00133519
RGU296021N0925732E	RGS292193N0931834E	Transitional	Central	0.0336425	10.8659	11.9434	13.2582	0.0001316	0.000180813	0.000240861	7.46586	8.54341	9.85822	9.04212e-05	0.00012934	0.000179094	14.2659	15.3434	16.6582	0.000172778	0.000232286	0.000302629
RGU295812N0925759E	RGS292330N0932173E	Transitional	Central	0.0229453	13.6452	14.9983	16.6494	0.000112713	0.000154863	0.000206294	10.2452	11.5983	13.2494	8.4628e-05	0.000119757	0.000164166	17.0452	18.3983	20.0494	0.000140798	0.00018997	0.000248421
RGU295755N0925681E	RGS292330N0932173E	Transitional	Central	0.0271914	13.6061	14.9555	16.6018	0.000133189	0.000182997	0.00024377	10.2061	11.5555	13.2018	9.99068e-05	0.000141394	0.000193847	17.0061	18.3555	20.0018	0.000166471	0.000224599	0.000293694
RGU296108N0925810E	RGS292465N0932340E	Transitional	Central	0.0168764	12.9558	14.2407	15.8083	7.87132e-05	0.000108149	0.000144065	9.55583	10.8407	12.4083	5.80565e-05	8.2328e-05	0.00011308	16.3558	17.6407	19.2083	9.93699e-05	0.00013397	0.000175051
RGU295326N0925844E	RGS291117N0932685E	Active	Central	0.101334	19.8875	21.8597	24.2661	0.000725497	0.000996804	0.00132785	16.4875	18.4597	20.8661	0.000601464	0.000841764	0.0011418	23.2875	25.2597	27.6661	0.000849529	0.00115184	0.00151389
RGU295329N0925823E	RGS291117N0932685E	Active	Central	0.0645785	20.5352	22.5717	25.0565	0.000477409	0.000655941	0.000873781	17.1352	19.1717	21.6565	0.000398364	0.000557136	0.000755215	23.9352	25.9717	28.4565	0.000556453	0.000754746	0.000992347
RGU295300N0925724E	RGS297911N0933516E	Transitional	Central	0.060905	10.3107	11.3333	12.5809	0.000226071	0.000310613	0.000413769	6.91074	7.93325	9.18088	0.000151524	0.000217428	0.000301947	13.7107	14.7333	15.9809	0.000300619	0.000403798	0.00052559
RGU295218N0925812E	RGS297911N0933516E	Active	Central	0.0219814	15.5336	17.0741	18.9537	0.000122922	0.00016889	0.000224979	12.1336	13.6741	15.5537	9.60169e-05	0.000135259	0.000184621	18.9336	20.4741	22.3537	0.000149827	0.000202522	0.000265337
RGU295169N0925733E	RGS297911N0933516E	Active	Central	0.201287	21.2565	23.3645	25.9366	0.00154032	0.00211633	0.00281917	17.8565	19.9645	22.5366	0.00129394	0.00180836	0.00244961	24.6565	26.7645	29.3366	0.00178669	0.0024243	0.00318874
RGU295204N0925790E	RGS297911N0933516E	Active	Central	0.060114	15.2483	16.7605	18.6056	0.00032999	0.000453393	0.000603966	11.8483	13.3605	15.2056	0.00025641	0.000361418	0.000493597	18.6483	20.1605	22.0056	0.000403569	0.000545367	0.000714335
RGU295178N0925759E	RGS297794N0933688E	Active	Central	0.0309269	24.4293	26.852	29.808	0.000271988	0.000373701	0.000497809	21.0293	23.452	26.408	0.000234134	0.000326383	0.000441027	27.8293	30.252	33.208	0.000309843	0.00042102	0.000554591
RGU295169N0925761E	RGS297794N0933688E	Active	Central	0.03429	18.5127	20.3486	22.5887	0.000228528	0.000313988	0.000418265	15.1127	16.9486	19.1887	0.000186557	0.000261525	0.000355309	21.9127	23.7486	25.9887	0.000270499	0.000366452	0.000481221
RGU295178N0925774E	RGS297732N0933602E	Active	Central	0.0155797	14.5904	16.0373	17.8028	8.1833e-05	0.000112435	0.000149776	11.1904	12.6373	14.4028	6.27634e-05	8.85984e-05	0.000121171	17.9904	19.4373	21.2028	0.000100903	0.000136272	0.00017838
RGU295133N0925729E	RGS297732N0933602E	Active	Central	0.0939555	12.9624	14.2479	15.8164	0.000438441	0.000602401	0.000802461	9.56244	10.8479	12.4164	0.00032344	0.00045865	0.000629959	16.3624	17.6479	19.2164	0.000553443	0.000746153	0.000974963
RGU295111N0925738E	RGS297732N0933602E	Active	Central	0.0200368	16.2379	17.8483	19.8131	0.000117129	0.00016093	0.000214376	12.8379	14.4483	16.4131	9.26035e-05	0.000130274	0.000177588	19.6379	21.2483	23.2131	0.000141654	0.000191586	0.000251163
RGU295110N0925859E	RGS297742N0933783E	Active	Central	0.0879341	13.6253	14.9765	16.6252	0.000431325	0.000592624	0.000789436	10.2253	11.5765	13.2252	0.000323693	0.000458084	0.000627989	17.0253	18.3765	20.0252	0.000538956	0.000727163	0.000950883
RGU294780N0925856E	RGS296052N0925124E	Active	Central	0.0374734	16.7332	18.3927	20.4174	0.000225738	0.000310156	0.00041316	13.3332	14.9927	17.0174	0.000179871	0.000252822	0.000344358	20.1332	21.7927	23.8174	0.000271606	0.00036749	0.000481961
RGU294762N0925745E	RGS296052N0925124E	Active	Central	0.0496119	18.3012	20.1161	22.3306	0.000326864	0.000449099	0.000598246	14.9012	16.7161	18.9306	0.000266139	0.000373193	0.000507159	21.7012	23.5161	25.7306	0.000387589	0.000525005	0.000689333
RGU294907N0925789E	RGS296052N0925124E	Transitional	Central	0.0705959	22.7343	24.9888	27.7398	0.000577781	0.000793848	0.00105749	19.3343	21.5888	24.3398	0.000491371	0.000685837	0.000927874	26.1343	28.3888	31.1398	0.00066419	0.00090186	0.0011871
RGU294817N0925382E	RGS298271N0933887E	Active	Central	0.0249858	11.1672	12.2746	13.6258	0.000100447	0.000138011	0.000183845	7.76715	8.87459	10.2258	6.98647e-05	9.97825e-05	0.000137971	14.5672	15.6746	17.0258	0.00013103	0.000176239	0.000229719
RGU294832N0925374E	RGS297554N0933756E	Active	Central	0.0338666	10.9126	11.9948	13.3153	0.000133047	0.000182801	0.00024351	7.51264	8.59484	9.9153	9.15941e-05	0.000130985	0.000181331	14.3126	15.3948	16.7153	0.0001745	0.000234617	0.000305689
RGU294805N0925372E	RGS297648N0933784E	Active	Central	0.134486	17.2082	18.9147	20.997	0.000833136	0.0011447	0.00152485	13.8082	15.5147	17.597	0.000668525	0.000938933	0.00127794	20.6082	22.3147	24.397	0.000997747	0.00135046	0.00177177
RGU294789N0925352E	RGS297648N0933784E	Transitional	Central	0.0748365	16.3162	17.9343	19.9086	0.000439578	0.000603964	0.000804542	12.9162	14.5343	16.5086	0.000347978	0.000489464	0.000667142	19.7162	21.3343	23.3086	0.000531178	0.000718463	0.000941942
RGU294777N0925367E	RGS297648N0933784E	Active	Central	0.0289443	12.3384	13.562	15.055	0.000128565	0.000176644	0.000235308	8.93838	10.162	11.655	9.31376e-05	0.000132359	0.000182166	15.7384	16.962	18.455	0.000163993	0.000220929	0.00028845
RGU296431N0924535E	RGS296058N0924914E	Active	Central	0.209785	13.7831	15.15	16.8178	0.00104094	0.00143021	0.00190518	10.3831	11.75	13.4178	0.00078416	0.00110924	0.00152002	17.1831	18.55	20.2178	0.00129771	0.00175118	0.00229035
RGU296333N0924549E	RGS296058N0924914E	Active	Central	0.0439236	11.5145	12.6563	14.0496	0.000182072	0.00025016	0.00033324	8.11446	9.25634	10.6496	0.00012831	0.000182957	0.000252596	14.9145	16.0563	17.4496	0.000235835	0.000317364	0.000413883
RGU296173N0924549E	RGS297039N0933424E	Transitional	Central	0.0307995	11.5161	12.6581	14.0516	0.000127688	0.000175439	0.000233702	8.11608	9.25812	10.6516	8.99896e-05	0.000128315	0.000177154	14.9161	16.0581	17.4516	0.000165387	0.000222562	0.00029025
RGU296197N0924577E	RGS297039N0933424E	Transitional	Central	0.0259143	12.7962	14.0652	15.6136	0.000119378	0.00016402	0.000218492	9.3962	10.6652	12.2136	8.76585e-05	0.000124371	0.000170913	16.1962	17.4652	19.0136	0.000151097	0.000203669	0.00026607
RGU295981N0924573E	RGS297816N0933883E	Transitional	Central	0.0232716	12.6552	13.9102	15.4415	0.000106022	0.000145671	0.000194048	9.25518	10.5102	12.0415	7.75379e-05	0.000110065	0.000151322	16.0552	17.3102	18.8415	0.000134507	0.000181276	0.000236775
RGU296002N0924564E	RGS297816N0933883E	Active	Central	0.117751	17.0798	18.7736	20.8403	0.000724022	0.000994779	0.00132515	13.6798	15.3736	17.4403	0.000579895	0.000814619	0.00110896	20.4798	22.1736	24.2403	0.00086815	0.00117494	0.00154134
RGU295997N0924599E	RGS297816N0933883E	Transitional	Central	0.118049	19.1055	21.0001	23.312	0.00081194	0.00111557	0.00148606	15.7055	17.6001	19.912	0.000667448	0.000934959	0.00126932	22.5055	24.4001	26.712	0.000956433	0.00129619	0.0017028
RGU295993N0924604E	RGS297816N0933883E	Transitional	Central	0.0888847	24.7963	27.2553	30.2558	0.000793444	0.00109016	0.00145221	21.3963	23.8553	26.8558	0.000684649	0.000954168	0.00128902	28.1963	30.6553	33.6558	0.000902239	0.00122616	0.0016154
RGU295933N0924610E	RGS297814N0934069E	Transitional	Central	0.108853	17.9739	19.7564	21.9313	0.000704344	0.000967741	0.00128913	14.5739	16.3564	18.5313	0.000571108	0.000801197	0.00108928	21.3739	23.1564	25.3313	0.00083758	0.00113429	0.00148899
RGU296053N0924523E	RGS297814N0934069E	Transitional	Central	0.095751	19.3589	21.2787	23.6212	0.000667309	0.000916856	0.00122135	15.9589	17.8787	20.2212	0.000550109	0.000770357	0.00104555	22.7589	24.6787	27.0212	0.000784508	0.00106336	0.00139715
RGU295878N0924670E	RGS298035N0933995E	Transitional	Central	0.34554	17.6285	19.3767	21.5098	0.00219288	0.00301294	0.00401354	14.2285	15.9767	18.1098	0.00176994	0.00248426	0.00337913	21.0285	22.7767	24.9098	0.00261582	0.00354161	0.00464796
RGU295864N0924670E	RGS298035N0933995E	Transitional	Central	0.0469645	13.094	14.3925	15.9769	0.000221382	0.000304171	0.000405187	9.69397	10.9925	12.5769	0.000163898	0.000232315	0.00031896	16.494	17.7925	19.3769	0.000278867	0.000376027	0.000491414
RGU295861N0924580E	RGS296926N0925646E	Transitional	Central	0.453398	25.7643	28.3193	31.4368	0.00420533	0.00577795	0.00769683	22.3643	24.9193	28.0368	0.00365037	0.00508426	0.00686439	29.1643	31.7193	34.8368	0.00476028	0.00647165	0.00852927
RGU295845N0924626E	RGS296926N0925646E	Transitional	Central	0.0388294	18.1998	20.0047	22.2069	0.000254408	0.000349547	0.000465633	14.7998	16.6047	18.8069	0.000206881	0.000290138	0.000394342	21.5998	23.4047	25.6069	0.000301935	0.000408956	0.000536924
RGU295811N0924586E	RGS296926N0925646E	Transitional	Central	0.26356	21.7859	23.9464	26.5826	0.00206709	0.0028401	0.0037833	18.3859	20.5464	23.1826	0.00174449	0.00243685	0.0032994	25.1859	27.3464	29.9826	0.00238968	0.00324334	0.0042672
RGU295814N0924649E	RGS296926N0925646E	Active	Central	0.0261229	21.7773	23.9369	26.572	0.000204798	0.000281385	0.000374834	18.3773	20.5369	23.172	0.000172824	0.000241417	0.000326872	25.1773	27.3369	29.972	0.000236773	0.000321353	0.000422796
RGU295824N0924538E	RGS298117N0934061E	Transitional	Central	0.314934	17.2215	18.9293	21.0132	0.00195251	0.00268267	0.00357359	13.8215	15.5293	17.6132	0.00156703	0.00220082	0.00299538	20.6215	22.3293	24.4132	0.00233799	0.00316452	0.00415181
RGU295796N0924469E	RGS297669N0925295E	Transitional	Central	0.0343596	16.3693	17.9927	19.9734	0.00020248	0.0002782	0.000370591	12.9693	14.5927	16.5734	0.000160424	0.000225629	0.000307506	19.7693	21.3927	23.3734	0.000244536	0.00033077	0.000433675
RGU295792N0924449E	RGS297669N0925295E	Active	Central	0.162728	24.6975	27.1467	30.1352	0.00144683	0.0019879	0.00264808	21.2975	23.7467	26.7352	0.00124766	0.00173892	0.00234931	28.0975	30.5467	33.5352	0.00164601	0.00223687	0.00294685
RGU295779N0924478E	RGS297669N0925295E	Active	Central	0.111357	19.263	21.1733	23.5042	0.000772224	0.00106101	0.00141337	15.863	17.7733	20.1042	0.000635924	0.00089063	0.00120892	22.663	24.5733	26.9042	0.000908525	0.00123138	0.00161782
RGU295778N0924497E	RGS297669N0925295E	Active	Central	0.059582	13.2133	14.5237	16.1225	0.000283419	0.000389407	0.00051873	9.81332	11.1237	12.7225	0.000210491	0.000298246	0.000409338	16.6133	17.9237	19.5225	0.000356347	0.000480567	0.000628123
RGU295821N0924407E	RGS298196N0935085E	Transitional	Central	0.034461	10.7491	11.8151	13.1158	0.000133353	0.000183222	0.000244071	7.3491	8.41508	9.71575	9.11727e-05	0.000130497	0.0001808	14.1491	15.2151	16.5158	0.000175533	0.000235947	0.000307341
RGU295985N0924437E	RGS298196N0935085E	Active	Central	0.356779	19.038	20.9259	23.2296	0.00244525	0.00335967	0.00447543	15.638	17.5259	19.8296	0.00200855	0.0028138	0.00382039	22.438	24.3259	26.6296	0.00288194	0.00390555	0.00513048
RGU296766N0924700E	RGS297487N0934620E	Transitional	Central	0.0405546	12.4878	13.7261	15.2372	0.000182317	0.000250496	0.000333687	9.08775	10.3261	11.8372	0.000132678	0.000188448	0.000259229	15.8878	17.1261	18.6372	0.000231956	0.000312545	0.000408145
RGU296788N0924700E	RGS296231N0934026E	Transitional	Central	0.0593209	13.6418	14.9947	16.6454	0.000291329	0.000400274	0.000533207	10.2418	11.5947	13.2454	0.00021872	0.000309513	0.000424294	17.0418	18.3947	20.0454	0.000363938	0.000491035	0.00064212
RGU296782N0924732E	RGS295616N0933994E	Transitional	Central	0.155404	20.9193	22.9938	25.5251	0.00117034	0.001608	0.00214202	17.5193	19.5938	22.1251	0.000980122	0.00137023	0.0018567	24.3193	26.3938	28.9251	0.00136055	0.00184576	0.00242734
RGU296714N0924837E	RGS295616N0933994E	Transitional	Central	0.0269954	15.7194	17.2783	19.1804	0.000152767	0.000209896	0.000279603	12.3194	13.8783	15.7804	0.000119725	0.000168593	0.000230039	19.1194	20.6783	22.5804	0.000185809	0.000251199	0.000329167
RGU297093N0924829E	RGS296019N0934366E	Active	Central	0.0595782	14.8937	16.3706	18.1728	0.000319441	0.0004389	0.00058466	11.4937	12.9706	14.7728	0.000246518	0.000347745	0.000475275	18.2937	19.7706	21.5728	0.000392365	0.000530055	0.000694046
RGU296977N0924757E	RGS296069N0934545E	Transitional	Central	0.191483	23.4672	25.7945	28.6341	0.00161769	0.00222265	0.00296079	20.0672	22.3945	25.2341	0.00138332	0.00192968	0.00260923	26.8672	29.1945	32.0341	0.00185207	0.00251562	0.00331236
RGU296989N0924743E	RGS297091N0934438E	Transitional	Central	0.161162	18.6492	20.4987	22.7553	0.001082	0.00148662	0.00198033	15.2492	17.0987	19.3553	0.000884735	0.00124004	0.00168444	22.0492	23.8987	26.1553	0.00127926	0.0017332	0.00227623
RGU297134N0924729E	RGS297091N0934438E	Active	Central	0.0205635	10.6206	11.6738	12.9589	7.86224e-05	0.000108024	0.000143899	7.22057	8.2738	9.55892	5.34527e-05	7.6562e-05	0.000106145	14.0206	15.0738	16.3589	0.000103792	0.000139486	0.000181654
RGU297986N0924517E	RGS297091N0934438E	Active	Central	0.340425	17.8356	19.6043	21.7625	0.00218581	0.00300321	0.00400059	14.4356	16.2043	18.3625	0.00176913	0.00248236	0.00337557	21.2356	23.0043	25.1625	0.00260249	0.00352406	0.00462561
RGU297928N0924589E	RGS298417N0935515E	Transitional	Central	0.0845784	13.7171	15.0774	16.7372	0.000417661	0.000573851	0.000764428	10.3171	11.6774	13.3372	0.000314137	0.000444446	0.000609142	17.1171	18.4774	20.1372	0.000521185	0.000703256	0.000919714
RGU297915N0924631E	RGS298417N0935515E	Active	Central	0.0369743	13.0346	14.3273	15.9045	0.000173501	0.000238384	0.000317552	9.63464	10.9273	12.5045	0.000128244	0.000181813	0.000249667	16.4346	17.7273	19.3045	0.000218758	0.000294954	0.000385436
RGU297991N0924701E	RGS295275N0925392E	Transitional	Central	0.147137	24.7052	27.1552	30.1446	0.00130862	0.001798	0.00239512	21.3052	23.7552	26.7446	0.00112853	0.00157288	0.00212497	28.1052	30.5552	33.5446	0.00148872	0.00202312	0.00266526
RGU298005N0924735E	RGS295275N0925392E	Active	Central	0.0586743	17.2543	18.9654	21.0532	0.000364458	0.000500751	0.000667053	13.8543	15.5654	17.6532	0.000292641	0.00041098	0.000559327	20.6543	22.3654	24.4532	0.000436276	0.000590523	0.000774779
RGU298303N0924872E	RGS298389N0935507E	Active	Central	0.118983	12.4015	13.6314	15.132	0.000531204	0.000729854	0.000972241	9.00153	10.2314	11.732	0.000385569	0.00054781	0.000753789	15.8015	17.0314	18.532	0.000676839	0.000911897	0.00119069
RGU294761N0924629E	RGS298389N0935507E	Transitional	Central	0.0457501	14.812	16.2809	18.0732	0.000243955	0.000335184	0.0004465	11.412	12.8809	14.6732	0.000187957	0.000265187	0.000362503	18.212	19.6809	21.4732	0.000299953	0.000405182	0.000530497
RGU294737N0924595E	RGS298176N0935585E	Active	Central	0.0123635	15.7607	17.3236	19.2307	7.01483e-05	9.63811e-05	0.00012839	12.3607	13.9236	15.8307	5.50154e-05	7.7465e-05	0.00010569	19.1607	20.7236	22.6307	8.52812e-05	0.000115297	0.000151089
RGU294718N0924610E	RGS298176N0935585E	Transitional	Central	0.0998434	20.3754	22.396	24.8615	0.000732365	0.00100624	0.00134042	16.9754	18.996	21.4615	0.000610156	0.00085348	0.0011571	23.7754	25.796	28.2615	0.000854573	0.001159	0.00152373
RGU294712N0924526E	RGS298139N0935577E	Transitional	Central	0.0831729	21.1836	23.2843	25.8476	0.000634283	0.000871481	0.0011609	17.7836	19.8843	22.4476	0.00053248	0.000744226	0.0010082	24.5836	26.6843	29.2476	0.000736087	0.000998735	0.00131361
RGU294807N0924657E	RGS298139N0935577E	Transitional	Central	0.0758553	16.8135	18.4809	20.5154	0.000459142	0.000630843	0.000840348	13.4135	15.0809	17.1154	0.000366295	0.000514784	0.000701078	20.2135	21.8809	23.9154	0.000551989	0.000746902	0.000979619
RGU294858N0924688E	RGS298072N0935460E	Transitional	Central	0.0763501	18.9408	20.8191	23.111	0.000520607	0.000715293	0.000952845	15.5408	17.4191	19.711	0.000427154	0.000598478	0.000812666	22.3408	24.2191	26.511	0.000614059	0.000832109	0.00109302
RGU294810N0924579E	RGS298072N0935460E	Active	Central	0.0734166	13.5372	14.8796	16.5177	0.000357787	0.000491586	0.000654843	10.1372	11.4796	13.1177	0.000267925	0.000379259	0.00052005	16.9372	18.2796	19.9177	0.000447649	0.000603913	0.000789636
RGU294756N0924796E	RGS298012N0935420E	Transitional	Central	0.0413642	10.7284	11.7924	13.0905	0.000159758	0.000219502	0.000292399	7.32843	8.39236	9.69053	0.000109129	0.000156215	0.000216455	14.1284	15.1924	16.4905	0.000210388	0.000282789	0.000368344
RGU294884N0924808E	RGS297997N0935126E	Active	Central	0.0677501	15.276	16.791	18.6394	0.000372583	0.000511915	0.000681923	11.876	13.391	15.2394	0.000289657	0.000408257	0.000557534	18.676	20.191	22.0394	0.000455509	0.000615572	0.000806312
RGU294847N0924867E	RGS297997N0935126E	Active	Central	0.119338	14.9963	16.4835	18.2981	0.000644265	0.000885196	0.00117917	11.5963	13.0835	14.8981	0.000498196	0.000702609	0.000960068	18.3963	19.8835	21.6981	0.000790335	0.00106778	0.00139828
RGU295004N0924571E	RGS297949N0935050E	Active	Central	0.130711	14.2626	15.677	17.4028	0.000671139	0.000922119	0.00122836	10.8626	12.277	14.0028	0.000511149	0.000722131	0.000988372	17.6626	19.077	20.8028	0.000831129	0.00112211	0.00146834
RGU294959N0924688E	RGS297949N0935050E	Active	Central	0.141219	17.2199	18.9276	21.0112	0.000875436	0.00120282	0.00160227	13.8199	15.5276	17.6112	0.000702585	0.000986751	0.001343	20.6199	22.3276	24.4112	0.00104829	0.00141888	0.00186155
RGU294969N0924798E	RGS297949N0935050E	Active	Central	0.0486745	15.6593	17.2122	19.1071	0.000274395	0.000377008	0.000502214	12.2593	13.8122	15.7071	0.000214818	0.000302536	0.000412847	19.0593	20.6122	22.5071	0.000333973	0.00045148	0.00059158
RGU295074N0924811E	RGS297812N0935010E	Active	Central	0.0138711	12.772	14.0386	15.584	6.37782e-05	8.76288e-05	0.000116731	9.37197	10.6386	12.184	4.67999e-05	6.6406e-05	9.12632e-05	16.172	17.4386	18.984	8.07565e-05	0.000108852	0.000142198
RGU295368N0924879E	RGS297812N0935010E	Active	Central	0.0702449	17.9086	19.6845	21.8515	0.000452875	0.000622232	0.000828878	14.5086	16.2845	18.4515	0.000366895	0.000514758	0.000699908	21.3086	23.0845	25.2515	0.000538854	0.000729707	0.000957847
RGU295388N0924808E	RGS297812N0935010E	Active	Central	0.0580726	13.162	14.4673	16.06	0.000275168	0.00037807	0.000503628	9.76204	11.0673	12.66	0.000204087	0.000289219	0.000397007	16.562	17.8673	19.46	0.000346249	0.000466921	0.000610249
RGU295305N0924634E	RGS297821N0935074E	Active	Central	0.0815611	17.4562	19.1874	21.2996	0.00051255	0.000704224	0.000938099	14.0562	15.7874	17.8996	0.000412719	0.000579436	0.000788353	20.8562	22.5874	24.6996	0.000612381	0.000829013	0.00108785
RGU295425N0924708E	RGS297821N0935074E	Active	Central	0.0444221	10.3256	11.3495	12.599	0.000165126	0.000226877	0.000302224	6.92557	7.94955	9.19898	0.000110753	0.000158911	0.000220664	13.7256	14.7495	15.999	0.000219499	0.000294843	0.000383783
RGU295431N0924663E	RGS297902N0935175E	Active	Central	0.0175903	13.5437	14.8868	16.5257	8.57655e-05	0.000117839	0.000156973	10.1437	11.4868	13.1257	6.4235e-05	9.09254e-05	0.000124677	16.9437	18.2868	19.9257	0.000107296	0.000144752	0.000189269
RGU295432N0924622E	RGS297902N0935175E	Active	Central	0.0958646	25.5019	28.0309	31.1167	0.000880103	0.00120923	0.00161082	22.1019	24.6309	27.7167	0.000762764	0.00106255	0.00143481	28.9019	31.4309	34.5167	0.000997441	0.0013559	0.00178682
RGU295454N0924572E	RGS295817N0925430E	Active	Central	0.126238	21.2941	23.4059	25.9825	0.000967728	0.00132962	0.00177119	17.8941	20.0059	22.5825	0.000813213	0.00113648	0.00153942	24.6941	26.8059	29.3825	0.00112224	0.00152277	0.00200297
RGU295447N0924535E	RGS295817N0925430E	Active	Central	0.0404714	20.5071	22.5408	25.0222	0.000298783	0.000410516	0.00054685	17.1071	19.1408	21.6222	0.000249246	0.000348595	0.000472544	23.9071	25.9408	28.4222	0.00034832	0.000472437	0.000621155
RGU295537N0924558E	RGS295817N0925430E	Active	Central	0.0146426	18.705	20.5599	22.8233	9.86e-05	0.000135473	0.000180463	15.305	17.1599	19.4233	8.06775e-05	0.000113069	0.00015358	22.105	23.9599	26.2233	0.000116523	0.000157876	0.000207347
RGU295756N0924781E	RGS295817N0925430E	Active	Central	0.040928	18.8458	20.7147	22.9951	0.000277675	0.000381515	0.000508218	15.4458	17.3147	19.5951	0.00022758	0.000318896	0.000433074	22.2458	24.1147	26.3951	0.000327771	0.000444135	0.000583362
RGU295723N0924719E	RGS295817N0925430E	Active	Central	0.0176883	15.1417	16.6433	18.4755	9.64189e-05	0.000132476	0.000176472	11.7417	13.2433	15.0755	7.47685e-05	0.000105413	0.000143996	18.5417	20.0433	21.8755	0.000118069	0.000159539	0.000208947
RGU295661N0924636E	RGS298601N0935651E	Active	Central	0.137293	17.9295	19.7076	21.8771	0.000886177	0.00121757	0.00162193	14.5295	16.3076	18.4771	0.00071813	0.00100751	0.00136986	21.3295	23.1076	25.2771	0.00105422	0.00142763	0.001874
RGU296292N0924879E	RGS298601N0935651E	Active	Central	0.194673	20.6279	22.6735	25.1696	0.00144565	0.00198627	0.00264592	17.2279	19.2735	21.7696	0.00120737	0.00168842	0.0022885	24.0279	26.0735	28.5696	0.00168393	0.00228412	0.00300334
RGU296190N0924869E	RGS298531N0935521E	Active	Central	0.0303524	13.0552	14.3499	15.9296	0.000142653	0.000195999	0.000261091	9.65523	10.9499	12.5296	0.000105501	0.00014956	0.000205364	16.4552	17.7499	19.3296	0.000179804	0.000242439	0.000316818
RGU296152N0924779E	RGS298531N0935521E	Active	Central	0.0658054	19.4003	21.3242	23.6717	0.000459591	0.00063146	0.00084117	16.0003	17.9242	20.2717	0.000379045	0.000530778	0.000720351	22.8003	24.7242	27.0717	0.000540137	0.000732142	0.000961989
RGU296168N0924727E	RGS297932N0935296E	Active	Central	0.0311445	17.1519	18.8528	20.9282	0.000192307	0.000264222	0.000351971	13.7519	15.4528	17.5282	0.000154186	0.000216571	0.00029479	20.5519	22.2528	24.3282	0.000230428	0.000311873	0.000409152
RGU296131N0924731E	RGS297932N0935296E	Active	Central	0.126174	22.8509	25.117	27.882	0.00103795	0.0014261	0.00189972	19.4509	21.717	24.482	0.000883513	0.00123306	0.00166806	26.2509	28.517	31.282	0.00119239	0.00161915	0.00213137
RGU296226N0924684E	RGS297932N0935296E	Active	Central	0.121182	21.303	23.4155	25.9933	0.000929351	0.00127689	0.00170095	17.903	20.0155	22.5933	0.000781024	0.00109148	0.00147846	24.703	26.8155	29.3933	0.00107768	0.0014623	0.00192344
RGU296303N0924657E	RGS297932N0935296E	Active	Central	0.127307	22.4153	24.6382	27.3505	0.00102731	0.00141148	0.00188024	19.0153	21.2382	23.9505	0.000871482	0.0012167	0.0016465	25.8153	28.0382	30.7505	0.00118313	0.00160626	0.00211397
RGU296384N0924648E	RGS298021N0935853E	Active	Central	0.35076	18.9699	20.8512	23.1466	0.0023954	0.00329118	0.0043842	15.5699	17.4512	19.7466	0.00196607	0.00275452	0.0037402	22.3699	24.2512	26.5466	0.00282473	0.00382785	0.00502819
RGU296378N0924667E	RGS298021N0935853E	Active	Central	0.0927774	19.5446	21.4829	23.8478	0.000652788	0.000896905	0.00119477	16.1446	18.0829	20.4478	0.000539228	0.000754956	0.00102443	22.9446	24.8829	27.2478	0.000766347	0.00103885	0.00136511
RGU296374N0924653E	RGS298194N0933805E	Active	Central	0.0241092	13.6473	15.0006	16.652	0.000118449	0.000162744	0.000216792	10.2473	11.6006	13.252	8.8939e-05	0.000125857	0.000172527	17.0473	18.4006	20.052	0.000147958	0.000199631	0.000261056
RGU296369N0924678E	RGS298194N0933805E	Transitional	Central	0.0810247	16.2191	17.8276	19.7901	0.000473094	0.000650013	0.000865885	12.8191	14.4276	16.3901	0.00037392	0.000526045	0.000717123	19.6191	21.2276	23.1901	0.000572268	0.000773981	0.00101465
RGU296369N0924705E	RGS296405N0934998E	Active	Central	0.117854	16.6668	18.3196	20.3363	0.000707127	0.000971565	0.00129423	13.2668	14.9196	16.9363	0.000562874	0.000791249	0.00107785	20.0668	21.7196	23.7363	0.00085138	0.00115188	0.0015106
RGU296515N0924717E	RGS296693N0935062E	Transitional	Central	0.118345	20.5265	22.5621	25.0459	0.000874512	0.00120155	0.00160058	17.1265	19.1621	21.6459	0.000729658	0.00102048	0.0013833	23.9265	25.9621	28.4459	0.00101937	0.00138261	0.00181786
RGU296657N0924853E	RGS296744N0934943E	Transitional	Central	0.0218011	9.9032	10.8853	12.0836	7.77242e-05	0.00010679	0.000142255	6.5032	7.48529	8.68361	5.10397e-05	7.34343e-05	0.000102229	13.3032	14.2853	15.4836	0.000104409	0.000140146	0.000182282
RGU296672N0924824E	RGS296744N0934943E	Transitional	Central	0.0416073	12.7338	13.9966	15.5375	0.000190736	0.000262063	0.000349096	9.33384	10.5966	12.1375	0.000139808	0.000198404	0.000272704	16.1338	17.3966	18.9375	0.000241663	0.000325723	0.000425487
RGU296660N0924816E	RGS297175N0935550E	Active	Central	0.0876564	12.2199	13.4317	14.9104	0.000385614	0.000529819	0.000705774	8.81988	10.0317	11.5104	0.000278323	0.000395705	0.000544837	15.6199	16.8317	18.3104	0.000492906	0.000663933	0.000866711
RGU296696N0924754E	RGS297175N0935550E	Active	Central	0.0749249	9.38402	10.3146	11.4501	0.000253115	0.00034777	0.000463266	5.98402	6.91462	8.05012	0.000161407	0.000233135	0.000325703	12.784	13.7146	14.8501	0.000344823	0.000462405	0.000600828
RGU296671N0924750E	RGS297090N0935463E	Active	Central	0.0321258	11.6324	12.786	14.1935	0.000134532	0.000184842	0.000246228	8.2324	9.38598	10.7935	9.52101e-05	0.000135689	0.000187245	15.0324	16.186	17.5935	0.000173854	0.000233994	0.000305211
RGU296779N0924831E	RGS297090N0935463E	Active	Central	0.0757551	14.6017	16.0497	17.8165	0.000398214	0.000547131	0.000728834	11.2017	12.6497	14.4165	0.00030549	0.000431225	0.000589748	18.0017	19.4497	21.2165	0.000490938	0.000663036	0.000867921
RGU296776N0924850E	RGS295667N0935804E	Transitional	Central	0.112931	17.5085	19.2448	21.3634	0.000711813	0.000978004	0.0013028	14.1085	15.8448	17.9634	0.000573585	0.000805219	0.00109546	20.9085	22.6448	24.7634	0.000850041	0.00115079	0.00151014
RGU296819N0924820E	RGS295667N0935804E	Active	Central	0.0779341	14.2766	15.6924	17.42	0.000400549	0.000550339	0.000733108	10.8766	12.2924	14.02	0.000305158	0.0004311	0.000590021	17.6766	19.0924	20.82	0.00049594	0.000669578	0.000876195
RGU296219N0925215E	RGS297996N0934122E	Transitional	Central	0.0886915	18.1399	19.9389	22.1339	0.000579189	0.000795784	0.00106007	14.7399	16.5389	18.7339	0.000470631	0.000660086	0.000897229	21.5399	23.3389	25.5339	0.000687748	0.000931482	0.0012229
RGU296169N0925221E	RGS297996N0934122E	Transitional	Central	0.0101809	11.7035	12.8641	14.2802	4.28947e-05	5.89357e-05	7.85084e-05	8.30347	9.46409	10.8802	3.04333e-05	4.33589e-05	5.98163e-05	15.1035	16.2641	17.6802	5.53562e-05	7.45125e-05	9.72006e-05
RGU296154N0925192E	RGS296539N0935584E	Transitional	Central	0.010842	10.1221	11.1259	12.3507	3.9508e-05	5.42825e-05	7.23099e-05	6.72213	7.72594	8.95075	2.62374e-05	3.76942e-05	5.24039e-05	13.5221	14.5259	15.7507	5.27787e-05	7.08708e-05	9.22159e-05
RGU296216N0925049E	RGS296539N0935584E	Transitional	Central	0.0206309	11.5022	12.6428	14.0346	8.5428e-05	0.000117375	0.000156355	8.10218	9.24284	10.6346	6.01758e-05	8.58095e-05	0.000118477	14.9022	16.0428	17.4346	0.00011068	0.00014894	0.000194234
RGU296243N0925027E	RGS296539N0935584E	Active	Central	0.0565695	14.3338	15.7552	17.4896	0.000291907	0.000401069	0.000534266	10.9338	12.3552	14.0896	0.000222666	0.000314518	0.000430404	17.7338	19.1552	20.8896	0.000361148	0.00048762	0.000638127
RGU296370N0925019E	RGS294440N0935535E	Active	Central	0.0168034	11.7942	12.9638	14.391	7.13459e-05	9.80265e-05	0.000130581	8.39421	9.56383	10.991	5.07785e-05	7.23172e-05	9.97303e-05	15.1942	16.3638	17.791	9.19133e-05	0.000123736	0.000161432
RGU296297N0925051E	RGS294440N0935535E	Transitional	Central	0.067121	11.101	12.2019	13.5451	0.000268239	0.00036855	0.000490947	7.70098	8.80185	10.1451	0.000186083	0.000265855	0.000367713	14.501	15.6019	16.9451	0.000350395	0.000471245	0.000614181
RGU296736N0925182E	RGS293556N0937546E	Active	Central	0.0225528	11.3592	12.4857	13.8602	9.22256e-05	0.000126714	0.000168797	7.9592	9.08568	10.4602	6.46209e-05	9.22085e-05	0.00012739	14.7592	15.8857	17.2602	0.00011983	0.00016122	0.000210204
RGU296799N0925062E	RGS293556N0937546E	Active	Central	0.0123173	20.1286	22.1247	24.5603	8.92545e-05	0.000122632	0.000163359	16.7286	18.7247	21.1603	7.41782e-05	0.000103787	0.000140744	23.5286	25.5247	27.9603	0.000104331	0.000141478	0.000185973
RGU296782N0925009E	RGS296782N0925009E	Active	Central	0.066063	17.9745	19.757	21.932	0.000427482	0.000587343	0.000782402	14.5745	16.357	18.532	0.000346621	0.000486267	0.00066111	21.3745	23.157	25.332	0.000508343	0.00068842	0.000903694
RGU296831N0925091E	RGS296831N0925091E	Transitional	Central	0.0227908	14.5604	16.0044	17.7662	0.000119464	0.000164139	0.00021865	11.1604	12.6044	14.3662	9.15679e-05	0.000129269	0.000176806	17.9604	19.4044	21.1662	0.00014736	0.000199009	0.000260494
RGU296810N0925149E	RGS296810N0925149E	Transitional	Central	0.238452	19.1197	21.0157	23.3293	0.00164128	0.00225506	0.00300398	15.7197	17.6157	19.9293	0.00134942	0.00189023	0.00256618	22.5197	24.4157	26.7293	0.00193315	0.00261989	0.00344177
RGU296781N0925203E	RGS296781N0925203E	Active	Central	0.101758	14.9124	16.3912	18.1957	0.000546286	0.000750576	0.000999845	11.5124	12.9912	14.7957	0.000421734	0.000594886	0.000813017	18.3124	19.7912	21.5957	0.000670839	0.000906267	0.00118667
RGU296756N0925253E	RGS296756N0925253E	Active	Western	0.0102667	11.016	12.1085	13.4414	4.07151e-05	5.5941e-05	7.45192e-05	7.61602	8.70847	10.0414	2.81488e-05	4.02331e-05	5.56697e-05	14.416	15.5085	16.8414	5.32815e-05	7.1649e-05	9.33688e-05
RGU296829N0925243E	RGS296829N0925243E	Active	Western	0.0136779	12.8279	14.1	15.6523	6.31651e-05	8.67864e-05	0.000115608	9.42791	10.7	12.2523	4.64234e-05	6.58593e-05	9.04959e-05	16.2279	17.5	19.0523	7.99068e-05	0.000107714	0.000140721
RGU296904N0925020E	RGS296904N0925020E	Active	Western	0.0194052	12.9382	14.2212	15.7868	9.03844e-05	0.000124185	0.000165427	9.53816	10.8212	12.3868	6.66324e-05	9.44947e-05	0.000129799	16.3382	17.6212	19.1868	0.000114136	0.000153875	0.000201055
RGU297010N0924887E	RGS297010N0924887E	Active	Western	0.0202449	15.5847	17.1302	19.016	0.000113584	0.00015606	0.000207888	12.1847	13.7302	15.616	8.88043e-05	0.000125085	0.000170718	18.9847	20.5302	22.416	0.000138364	0.000187035	0.000245058
RGU297181N0924982E	RGS297181N0924982E	Active	Western	0.113848	17.7153	19.4721	21.6157	0.000726062	0.000997581	0.00132888	14.3153	16.0721	18.2157	0.000586713	0.000823394	0.00111986	21.1153	22.8721	25.0157	0.000865411	0.00117177	0.00153791
RGU297067N0925023E	RGS297067N0925023E	Active	Western	0.154669	17.8573	19.6282	21.789	0.000994313	0.00136615	0.00181985	14.4573	16.2282	18.389	0.000804998	0.0011295	0.00153588	21.2573	23.0282	25.189	0.00118363	0.00160279	0.00210382
RGU297048N0924938E	RGS297048N0924938E	Active	Western	0.064622	16.4738	18.1075	20.1009	0.000383246	0.000526565	0.000701439	13.0738	14.7075	16.7009	0.000304148	0.000427693	0.000582793	19.8738	21.5075	23.5009	0.000462343	0.000625436	0.000820085
RGU298069N0923261E	RGS298069N0923261E	Active	Western	0.014334	16.1173	17.7157	19.6659	8.31694e-05	0.000114271	0.000152221	12.7173	14.3157	16.2659	6.56245e-05	9.23404e-05	0.000125904	19.5173	21.1157	23.0659	0.000100714	0.000136203	0.000178539
RGU298356N0923243E	RGS298356N0923243E	Active	Western	0.0357419	22.5072	24.7392	27.4626	0.000289602	0.000397902	0.000530046	19.1072	21.3392	24.0626	0.000245854	0.000343217	0.000464424	25.9072	28.1392	30.8626	0.00033335	0.000452587	0.000595669
RGU298531N0923234E	RGS298531N0923234E	Active	Western	0.0661569	16.8049	18.4714	20.5049	0.000400234	0.000549906	0.000732531	13.4049	15.0714	17.1049	0.000319258	0.000448686	0.000611067	20.2049	21.8714	23.9049	0.00048121	0.000651126	0.000853995
RGU298063N0923327E	RGS298063N0923327E	Active	Western	0.0315432	10.7968	11.8675	13.174	0.000122604	0.000168453	0.000224397	7.39682	8.46753	9.77398	8.39951e-05	0.000120192	0.000166484	14.1968	15.2675	16.574	0.000161213	0.000216714	0.00028231
RGU298096N0923314E	RGS298096N0923314E	Active	Western	0.0122983	12.9405	14.2238	15.7896	5.72924e-05	7.87176e-05	0.00010486	9.54049	10.8238	12.3896	4.22393e-05	5.99012e-05	8.22803e-05	16.3405	17.6238	19.1896	7.23455e-05	9.75339e-05	0.00012744
RGU298044N0923639E	RGS298044N0923639E	Active	Western	0.0163585	14.1985	15.6065	17.3246	8.36155e-05	0.000114884	0.000153038	10.7985	12.2065	13.9246	6.35928e-05	8.9856e-05	0.000123004	17.5985	19.0065	20.7246	0.000103638	0.000139913	0.000183072
RGU297705N0923835E	RGS297705N0923835E	Active	Western	0.0104304	16.7877	18.4525	20.4839	6.30371e-05	8.66105e-05	0.000115374	13.3877	15.0525	17.0839	5.02703e-05	7.0652e-05	9.62239e-05	20.1877	21.8525	23.8839	7.5804e-05	0.000102569	0.000134524
RGU297694N0923857E	RGS297694N0923857E	Active	Western	0.0158611	10.1159	11.1191	12.3431	5.77615e-05	7.9362e-05	0.000105718	6.71588	7.71906	8.94312	3.83476e-05	5.50946e-05	7.65975e-05	13.5159	14.5191	15.7431	7.71754e-05	0.000103629	0.000134839
RGU297674N0923929E	RGS297674N0923929E	Active	Western	0.0170658	9.98442	10.9746	12.1827	6.13413e-05	8.42806e-05	0.00011227	6.58442	7.57457	8.78272	4.04527e-05	5.81699e-05	8.09376e-05	13.3844	14.3746	15.5827	8.22299e-05	0.000110391	0.000143603
RGU297756N0923998E	RGS297756N0923998E	Transitional	Western	0.0275677	15.4568	16.9897	18.86	0.0001534	0.000210765	0.000280761	12.0568	13.5897	15.46	0.000119657	0.000168587	0.000230147	18.8568	20.3897	22.26	0.000187143	0.000252944	0.000331375
RGU297710N0924025E	RGS297710N0924025E	Transitional	Western	0.0104872	14.8383	16.3098	18.1053	5.60202e-05	7.69696e-05	0.000102531	11.4383	12.9098	14.7053	4.31839e-05	6.09242e-05	8.3277e-05	18.2383	19.7098	21.5053	6.88565e-05	9.30149e-05	0.000121786
RGU297517N0924046E	RGS297517N0924046E	Active	Western	0.0314302	19.6582	21.6077	23.9864	0.00022243	0.00030561	0.000407104	16.2582	18.2077	20.5864	0.000183959	0.000257522	0.000349398	23.0582	25.0077	27.3864	0.0002609	0.000353698	0.00046481
RGU297528N0923912E	RGS297528N0923912E	Active	Western	0.082066	15.7655	17.329	19.2367	0.000465773	0.000639954	0.000852485	12.3655	13.929	15.8367	0.000365324	0.000514393	0.000701812	19.1655	20.729	22.6367	0.000566222	0.000765515	0.00100316
RGU298283N0923963E	RGS298283N0923963E	Active	Western	0.104351	19.2219	21.1281	23.454	0.000722099	0.000992136	0.00132163	15.8219	17.7281	20.054	0.000594373	0.000832478	0.00113004	22.6219	24.5281	26.854	0.000849825	0.00115179	0.00151322
RGU298287N0923939E	RGS298287N0923939E	Active	Western	0.0689259	19.3884	21.3111	23.6571	0.000481089	0.000660998	0.000880518	15.9884	17.9111	20.2571	0.000396724	0.000555541	0.00075397	22.7884	24.7111	27.0571	0.000565455	0.000766455	0.00100707
RGU298290N0923926E	RGS298290N0923926E	Active	Western	0.012003	8.84669	9.72401	10.7945	3.82273e-05	5.25228e-05	6.99658e-05	5.44669	6.32401	7.39449	2.35356e-05	3.41582e-05	4.79283e-05	12.2467	13.124	14.1945	5.2919e-05	7.08874e-05	9.20033e-05
RGU298272N0923893E	RGS298272N0923893E	Transitional	Western	0.18493	17.617	19.3641	21.4958	0.00117285	0.00161145	0.00214662	14.217	15.9641	18.0958	0.000946497	0.00132851	0.00180709	21.017	22.7641	24.8958	0.00139921	0.0018944	0.00248615
RGU298189N0924176E	RGS298189N0924176E	Active	Western	0.0140133	11.4466	12.5817	13.9668	5.77453e-05	7.93399e-05	0.000105689	8.04655	9.18169	10.5668	4.05931e-05	5.78995e-05	7.99605e-05	14.8466	15.9817	17.3668	7.48976e-05	0.00010078	0.000131417
RGU298084N0924140E	RGS298084N0924140E	Active	Western	0.0124778	9.51051	10.4537	11.6045	4.27214e-05	5.86976e-05	7.81912e-05	6.11051	7.05366	8.20446	2.74485e-05	3.96065e-05	5.52819e-05	12.9105	13.8537	15.0045	5.79943e-05	7.77887e-05	0.000101101
RGU298071N0924248E	RGS298071N0924248E	Active	Western	0.0195319	10.3555	11.3824	12.6354	7.28142e-05	0.000100044	0.000133269	6.95546	7.9824	9.23544	4.89071e-05	7.01601e-05	9.74082e-05	13.7555	14.7824	16.0354	9.67212e-05	0.000129928	0.000169129
RGU298062N0924310E	RGS298062N0924310E	Active	Western	0.0490538	14.9614	16.4451	18.2555	0.000264209	0.000363012	0.00048357	11.5614	13.0451	14.8555	0.000204167	0.00028796	0.000393507	18.3614	19.8451	21.6555	0.00032425	0.000438065	0.000573633
RGU298088N0924377E	RGS298088N0924377E	Active	Western	0.0224093	10.9588	12.0455	13.3716	8.84081e-05	0.000121469	0.00016181	7.55876	8.64553	9.97157	6.09791e-05	8.71831e-05	0.000120666	14.3588	15.4455	16.7716	0.000115837	0.000155756	0.000202953
RGU298089N0924426E	RGS298089N0924426E	Active	Western	0.0950579	21.4598	23.588	26.1847	0.000734374	0.001009	0.00134409	18.0598	20.188	22.7847	0.000618023	0.000863563	0.00116957	24.8598	26.988	29.5847	0.000850725	0.00115444	0.00151862
RGU297963N0924397E	RGS297963N0924397E	Active	Western	0.0158595	33.7102	37.0532	41.1322	0.000192465	0.00026444	0.000352261	30.3102	33.6532	37.7322	0.000173053	0.000240175	0.000323143	37.1102	40.4532	44.5322	0.000211877	0.000288705	0.000381379
RGU297810N0924277E	RGS297810N0924277E	Active	Western	0.0605076	17.0666	18.7591	20.8242	0.000371757	0.00051078	0.000680411	13.6666	15.3591	17.4242	0.000297696	0.000418203	0.00056932	20.4666	22.1591	24.2242	0.000445818	0.000603356	0.000791503
RGU297782N0924373E	RGS297782N0924373E	Active	Western	0.0157176	11.6401	12.7945	14.2029	6.58639e-05	9.04944e-05	0.000120548	8.24012	9.39445	10.8029	4.66255e-05	6.64464e-05	9.16903e-05	15.0401	16.1945	17.6029	8.51023e-05	0.000114542	0.000149406
RGU297695N0924431E	RGS296195N0922263E	Active	Western	0.046873	14.1786	15.5847	17.3003	0.000239254	0.000328725	0.000437896	10.7786	12.1847	13.9003	0.000181881	0.00025701	0.000351837	17.5786	18.9847	20.7003	0.000296626	0.000400441	0.000523955
RGU297716N0924449E	RGS296195N0922263E	Active	Western	0.047807	15.2671	16.7812	18.6285	0.000262756	0.000361016	0.000480911	11.8671	13.3812	15.2285	0.00020424	0.000287871	0.000393137	18.6671	20.1812	22.0285	0.000321272	0.000434161	0.000568685
RGU297391N0924379E	RGS296195N0922263E	Active	Western	0.032155	12.1277	13.3304	14.7979	0.000140388	0.000192887	0.000256946	8.72769	9.93039	11.3979	0.00010103	0.00014369	0.000197909	15.5277	16.7304	18.1979	0.000179745	0.000242084	0.000315982
RGU297225N0924249E	RGS297225N0924249E	Active	Western	0.0201623	12.1415	13.3456	14.8147	8.81281e-05	0.000121085	0.000161297	8.74152	9.94558	11.4147	6.34495e-05	9.02364e-05	0.000124279	15.5415	16.7456	18.2147	0.000112807	0.000151933	0.000198315
RGU297190N0924238E	RGS297190N0924238E	Active	Western	0.0276033	11.6511	12.8065	14.2163	0.000115779	0.000159075	0.000211905	8.25105	9.40648	10.8163	8.19923e-05	0.000116842	0.000161225	15.0511	16.2065	17.6163	0.000149565	0.000201308	0.000262585
RGU297113N0924197E	RGS297113N0924197E	Active	Western	0.0665762	19.3932	21.3164	23.663	0.000464804	0.000638623	0.000850712	15.9932	17.9164	20.263	0.000383315	0.000536762	0.000728478	22.7932	24.7164	27.063	0.000546294	0.000740485	0.000972946
RGU294717N0924368E	RGS294717N0924368E	Active	Western	0.0140787	9.6084	10.5613	11.7239	4.86986e-05	6.691e-05	8.91311e-05	6.2084	7.16126	8.32391	3.14663e-05	4.53696e-05	6.32826e-05	13.0084	13.9613	15.1239	6.5931e-05	8.84505e-05	0.00011498
RGU294850N0924388E	RGS294850N0924388E	Active	Western	0.0107686	12.9869	14.2748	15.8462	5.03461e-05	6.91736e-05	9.21463e-05	9.58686	10.8748	12.4462	3.71653e-05	5.26976e-05	7.23752e-05	16.3869	17.6748	19.2462	6.35268e-05	8.56495e-05	0.000111917
RGU296629N0921760E	RGS296629N0921760E	Transitional	Western	0.0139259	11.8612	13.0375	14.4727	5.94641e-05	8.17014e-05	0.000108835	8.46122	9.63749	11.0727	4.24188e-05	6.03948e-05	8.32668e-05	15.2612	16.4375	17.8727	7.65094e-05	0.000103008	0.000134403
RGU296356N0921768E	RGS296356N0921768E	Transitional	Western	0.0104431	13.3771	14.7037	16.3223	5.02912e-05	6.90982e-05	9.2046e-05	9.97708	11.3037	12.9223	3.75089e-05	5.31203e-05	7.28725e-05	16.7771	18.1037	19.7223	6.30736e-05	8.50761e-05	0.000111219
RGU296451N0921874E	RGS296451N0921874E	Transitional	Western	0.0431996	18.1051	19.9006	22.0914	0.000281568	0.000386864	0.000515343	14.7051	16.5006	18.6914	0.000228692	0.000320769	0.000436028	21.5051	23.3006	25.4914	0.000334445	0.000452959	0.000594657
RGU295841N0921914E	RGS295841N0921914E	Transitional	Western	0.0576793	19.2466	21.1553	23.4842	0.000399648	0.000549101	0.000731459	15.8466	17.7553	20.0842	0.000329048	0.000460851	0.00062556	22.6466	24.5553	26.8842	0.000470247	0.00063735	0.000837358
RGU295710N0922053E	RGS295710N0922053E	Transitional	Western	0.0373272	15.4733	17.0078	18.8801	0.000207927	0.000285683	0.00038056	12.0733	13.6078	15.4801	0.000162238	0.000228573	0.000312027	18.8733	20.4078	22.2801	0.000253615	0.000342794	0.000449092
RGU295728N0922124E	RGS295728N0922124E	Transitional	Western	0.0518994	13.0312	14.3235	15.9003	0.000243473	0.000334522	0.000445618	9.63123	10.9235	12.5003	0.000179948	0.000255116	0.000350331	16.4312	17.7235	19.3003	0.000306998	0.000413928	0.000540905
RGU295842N0922163E	RGS295842N0922163E	Transitional	Western	0.0183601	13.2354	14.548	16.1495	8.74816e-05	0.000120196	0.000160114	9.83544	11.148	12.7495	6.50088e-05	9.21054e-05	0.000126405	16.6354	17.948	19.5495	0.000109954	0.000148287	0.000193823
RGU295843N0922171E	RGS295843N0922171E	Transitional	Western	0.0437335	12.4992	13.7388	15.2512	0.000196789	0.00027038	0.000360174	9.09924	10.3388	11.8512	0.000143259	0.000203468	0.000279879	15.8992	17.1388	18.6512	0.000250318	0.000337292	0.000440469
RGU296146N0922120E	RGS297825N0922856E	Transitional	Western	0.126958	14.2629	15.6773	17.4032	0.000651885	0.000895665	0.00119312	10.8629	12.2773	14.0032	0.000496488	0.000701419	0.000960023	17.6629	19.0773	20.8032	0.000807282	0.00108991	0.00142621
RGU296119N0922165E	RGS296119N0922165E	Transitional	Western	0.0299702	11.689	12.8481	14.2625	0.000126115	0.000173278	0.000230824	8.28896	9.44814	10.8625	8.94319e-05	0.000127423	0.000175798	15.089	16.2481	17.6625	0.000162799	0.000219132	0.000285849
RGU297515N0922105E	RGS298362N0922845E	Transitional	Western	0.0366495	17.5312	19.2698	21.3911	0.000231304	0.000317803	0.000423347	14.1312	15.8698	17.9911	0.000186445	0.000261729	0.000356058	20.9312	22.6698	24.7911	0.000276163	0.000373877	0.000490635
RGU295605N0922132E	RGS298362N0922845E	Transitional	Western	0.0833881	14.5793	16.0251	17.7893	0.000437666	0.000601337	0.000801043	11.1793	12.6251	14.3893	0.000335599	0.000473753	0.000647942	17.9793	19.4251	21.1893	0.000539733	0.00072892	0.000954143
RGU295590N0922159E	RGS295590N0922159E	Transitional	Western	0.075603	12.3228	13.5448	15.0359	0.00033539	0.000460812	0.00061385	8.92277	10.1448	11.6359	0.000242852	0.00034514	0.000475043	15.7228	16.9448	18.4359	0.000427928	0.000576485	0.000752657
RGU295739N0922248E	RGS295739N0922248E	Transitional	Western	0.165877	18.162	19.9631	22.1608	0.00108456	0.00149014	0.00198502	14.762	16.5631	18.7608	0.000881525	0.00123635	0.00168047	21.562	23.3631	25.5608	0.00128759	0.00174393	0.00228957
RGU295763N0922287E	RGS295763N0922287E	Transitional	Western	0.0709602	15.2264	16.7364	18.5789	0.00038897	0.00053443	0.000711915	11.8264	13.3364	15.1789	0.000302115	0.00042586	0.000581632	18.6264	20.1364	21.9789	0.000475825	0.000642999	0.000842198
RGU296191N0922258E	RGS296191N0922258E	Transitional	Western	0.39637	16.6436	18.2941	20.308	0.00237492	0.00326305	0.00434672	13.2436	14.8941	16.908	0.00188976	0.0026566	0.00361898	20.0436	21.6941	23.708	0.00286008	0.0038695	0.00507445
RGU295554N0922352E	RGS295554N0922352E	Transitional	Western	0.133642	16.0248	17.614	19.553	0.000770971	0.00105928	0.00141108	12.6248	14.214	16.153	0.000607393	0.000854812	0.00116571	19.4248	21.014	22.953	0.000934549	0.00126376	0.00165644
RGU295199N0922458E	RGS298503N0923106E	Transitional	Western	0.0349035	14.3716	15.7968	17.5358	0.000180583	0.000248114	0.000330513	10.9716	12.3968	14.1358	0.000137861	0.000194711	0.00026643	17.7716	19.1968	20.9358	0.000223305	0.000301516	0.000394596
RGU295231N0922453E	RGS298503N0923106E	Active	Western	0.0568913	11.8021	12.9724	14.4005	0.000241716	0.000332109	0.000442403	8.40205	9.57245	11.0005	0.000172081	0.000245065	0.000337951	15.2021	16.3724	17.8005	0.000311351	0.000419152	0.000546855
RGU295862N0922279E	RGS298503N0923106E	Active	Western	0.0199497	15.0148	16.5038	18.3206	0.000107834	0.00014816	0.000197365	11.6148	13.1038	14.9206	8.3416e-05	0.000117637	0.000160737	18.4148	19.9038	21.7206	0.000132253	0.000178683	0.000233993
RGU296770N0922137E	RGS296770N0922137E	Transitional	Western	0.0312654	11.7801	12.9483	14.3737	0.000132591	0.000182175	0.000242676	8.38005	9.54827	10.9737	9.43221e-05	0.000134339	0.000185273	15.1801	16.3483	17.7737	0.00017086	0.000230011	0.000300079
RGU297653N0922240E	RGS297653N0922240E	Active	Western	0.0907419	17.9033	19.6788	21.8451	0.00058485	0.000803561	0.00107043	14.5033	16.2788	18.4451	0.000473782	0.000664726	0.000903824	21.3033	23.0788	25.2451	0.000695918	0.000942396	0.00123703
RGU297716N0922429E	RGS297716N0922429E	Transitional	Western	0.0175871	8.85592	9.73415	10.8057	5.60701e-05	7.70381e-05	0.000102623	5.45592	6.33415	7.40575	3.45434e-05	5.01298e-05	7.03328e-05	12.2559	13.1342	14.2057	7.75967e-05	0.000103946	0.000134913
RGU297728N0922456E	RGS298004N0923064E	Transitional	Western	0.143332	12.405	13.6352	15.1362	0.00064009	0.000879459	0.00117153	9.00499	10.2352	11.7362	0.000464652	0.000660161	0.000908373	15.805	17.0352	18.5362	0.000815528	0.00109876	0.00143469
RGU298035N0922467E	RGS298035N0922467E	Transitional	Western	0.0440398	13.7317	15.0935	16.7551	0.000217707	0.000299122	0.000398461	10.3317	11.6935	13.3551	0.000163803	0.000231741	0.000317604	17.1317	18.4935	20.1551	0.000271612	0.000366502	0.000479318
RGU298053N0922462E	RGS298053N0922462E	Transitional	Western	0.464769	20.5464	22.5839	25.0701	0.00343775	0.00472334	0.00629198	17.1464	19.1839	21.6701	0.00286888	0.00401224	0.00543866	23.9464	25.9839	28.4701	0.00400663	0.00543443	0.00714529
RGU298050N0922535E	RGS298050N0922535E	Transitional	Western	0.0315076	11.3187	12.4412	13.8108	0.000128386	0.000176397	0.000234979	7.91874	9.04121	10.4108	8.98203e-05	0.00012819	0.000177131	14.7187	15.8412	17.2108	0.000166951	0.000224604	0.000292827
RGU296072N0922373E	RGS298687N0923151E	Transitional	Western	0.0564503	16.8245	18.4929	20.5287	0.000341908	0.000469769	0.000625781	13.4245	15.0929	17.1287	0.000272813	0.0003834	0.000522138	20.2245	21.8929	23.9287	0.000411004	0.000556138	0.000729423
RGU297719N0922621E	RGS298687N0923151E	Transitional	Western	0.0660146	16.0616	17.6544	19.5979	0.000381708	0.000524452	0.000698624	12.6616	14.2544	16.1979	0.000300906	0.00042345	0.000577422	19.4616	21.0544	22.9979	0.00046251	0.000625454	0.000819827
RGU297685N0922627E	RGS297685N0922627E	Active	Western	0.0675051	14.6765	16.132	17.9079	0.000356666	0.000490046	0.000652791	11.2765	12.732	14.5079	0.00027404	0.000386763	0.000528852	18.0765	19.532	21.3079	0.000439293	0.000593328	0.000776731
RGU297224N0922682E	RGS297224N0922682E	Transitional	Western	0.0170604	12.0217	13.2139	14.6685	7.38342e-05	0.000101445	0.000135136	8.62169	9.81387	11.2685	5.29523e-05	7.53429e-05	0.000103813	15.4217	16.6139	18.0685	9.47162e-05	0.000127548	0.000166459
RGU297205N0922710E	RGS297205N0922710E	Transitional	Western	0.0600391	12.2961	13.5155	15.0033	0.000265768	0.000365155	0.000486425	8.89607	10.1155	11.6033	0.00019228	0.000273295	0.000376193	15.6961	16.9155	18.4033	0.000339256	0.000457015	0.000596656
RGU297267N0922766E	RGS297267N0922766E	Transitional	Western	0.0128613	21.1495	23.2469	25.806	9.79234e-05	0.000134543	0.000179225	17.7495	19.8469	22.406	8.21812e-05	0.000114865	0.000155612	24.5495	26.6469	29.206	0.000113666	0.000154221	0.000202838
RGU297721N0922797E	RGS297721N0922797E	Transitional	Western	0.186594	24.1533	26.5486	29.4712	0.00162247	0.00222921	0.00296954	20.7533	23.1486	26.0712	0.00139408	0.00194373	0.00262696	27.5533	29.9486	32.8712	0.00185086	0.0025147	0.00331213
RGU297219N0922790E	RGS297219N0922790E	Transitional	Western	0.0523549	15.638	17.1888	19.0811	0.000294742	0.000404963	0.000539453	12.238	13.7888	15.6811	0.000230659	0.000324861	0.00044333	19.038	20.5888	22.4811	0.000358824	0.000485066	0.000635577
RGU298334N0922789E	RGS298334N0922789E	Transitional	Western	0.0185214	12.7316	13.9942	15.5347	8.48905e-05	0.000116636	0.000155371	9.33158	10.5942	12.1347	6.22203e-05	8.82984e-05	0.000121366	16.1316	17.3942	18.9347	0.000107561	0.000144974	0.000189377
RGU297995N0922923E	RGS297995N0922923E	Transitional	Western	0.0188514	13.0508	14.345	15.9242	8.85693e-05	0.000121691	0.000162105	9.65081	10.945	12.5242	6.54952e-05	9.28482e-05	0.000127494	16.4508	17.745	19.3242	0.000111643	0.000150533	0.000196716
RGU297823N0923021E	RGS297823N0923021E	Transitional	Western	0.0142538	9.85725	10.8348	12.0275	5.05813e-05	6.94968e-05	9.25769e-05	6.45725	7.43478	8.62754	3.31346e-05	4.76884e-05	6.64068e-05	13.2572	14.2348	15.4275	6.8028e-05	9.13051e-05	0.000118747
RGU297730N0922987E	RGS297730N0922987E	Transitional	Western	0.0686165	17.2614	18.9731	21.0618	0.000426389	0.000585842	0.000780402	13.8614	15.5731	17.6618	0.000342402	0.000480858	0.000654422	20.6614	22.3731	24.4618	0.000510375	0.000690825	0.000906381
RGU297985N0922994E	RGS297985N0922994E	Transitional	Western	0.161718	19.7389	21.6964	24.0849	0.00114917	0.00157892	0.00210328	16.3389	18.2964	20.6849	0.000951228	0.00133149	0.00180637	23.1389	25.0964	27.4849	0.00134711	0.00182634	0.00240019
RGU297674N0923035E	RGS297674N0923035E	Transitional	Western	0.0193175	12.6793	13.9367	15.471	8.81758e-05	0.00012115	0.000161384	9.27933	10.5367	12.071	6.45312e-05	9.15944e-05	0.000125918	16.0793	17.3367	18.871	0.00011182	0.000150706	0.000196851
RGU297827N0923068E	RGS297827N0923068E	Active	Western	0.0177585	14.8354	16.3066	18.1017	9.48435e-05	0.000130311	0.000173588	11.4354	12.9066	14.7017	7.31072e-05	0.000103141	0.000140984	18.2354	19.7066	21.5017	0.00011658	0.000157482	0.000206193
RGU297668N0923115E	RGS297668N0923115E	Active	Western	0.157396	20.5375	22.5742	25.0593	0.00116371	0.00159889	0.00212988	17.1375	19.1742	21.6593	0.000971053	0.00135807	0.0018409	23.9375	25.9742	28.4593	0.00135636	0.0018397	0.00241886
RGU297897N0923118E	RGS297897N0923118E	Active	Central	0.0230685	12.3365	13.5599	15.0526	0.00010245	0.000140763	0.000187511	8.93648	10.1599	11.6526	7.42145e-05	0.000105468	0.000145157	15.7365	16.9599	18.4526	0.000130686	0.000176058	0.000229864
RGU297894N0923133E	RGS297894N0923133E	Active	Central	0.0235703	16.9874	18.6721	20.7276	0.000144143	0.000198047	0.00026382	13.5874	15.2721	17.3276	0.000115293	0.000161985	0.000220545	20.3874	22.0721	24.1276	0.000172993	0.00023411	0.000307095
RGU297890N0923198E	RGS297890N0923198E	Transitional	Central	0.0124592	32.7737	36.0239	39.9896	0.000147	0.000201972	0.000269048	29.3737	32.6239	36.5896	0.00013175	0.00018291	0.000246173	36.1737	39.4239	43.3896	0.00016225	0.000221035	0.000291923
RGU298051N0923105E	RGS298051N0923105E	Transitional	Central	0.0225474	17.4347	19.1637	21.2733	0.000141519	0.000194441	0.000259016	14.0347	15.7637	17.8733	0.000113921	0.000159944	0.000217619	20.8347	22.5637	24.6733	0.000169117	0.000228939	0.000300413
RGU297397N0923128E	RGS297397N0923128E	Transitional	Central	0.0164975	16.1423	17.7431	19.6964	9.58706e-05	0.000131723	0.000175468	12.7423	14.3431	16.2964	7.56777e-05	0.000106481	0.000145179	19.5423	21.1431	23.0964	0.000116064	0.000156964	0.000205757
RGU298686N0923154E	RGS298686N0923154E	Transitional	Central	0.0611491	26.6305	29.2714	32.4938	0.000586235	0.000805464	0.00107296	23.2305	25.8714	29.0938	0.000511388	0.000711906	0.000960692	30.0305	32.6714	35.8938	0.000661082	0.000899022	0.00118523
RGU298633N0923124E	RGS298633N0923124E	Active	Central	0.0250103	20.0035	21.9872	24.4077	0.000180105	0.000247458	0.000329639	16.6035	18.5872	21.0077	0.000149493	0.000209192	0.000283721	23.4035	25.3872	27.8077	0.000210718	0.000285724	0.000375558
RGU298591N0923119E	RGS298591N0923119E	Transitional	Central	0.0157515	13.4623	14.7974	16.4264	7.63388e-05	0.000104887	0.00013972	10.0623	11.3974	13.0264	5.70589e-05	8.07867e-05	0.0001108	16.8623	18.1974	19.8264	9.56186e-05	0.000128986	0.000168639
RGU298590N0923075E	RGS298590N0923075E	Transitional	Central	0.0137282	26.0864	28.6734	31.8299	0.000128923	0.000177135	0.000235962	22.6864	25.2734	28.4299	0.000112119	0.000156131	0.000210757	29.4864	32.0734	35.2299	0.000145726	0.000198139	0.000261167
RGU295369N0921812E	RGS295369N0921812E	Transitional	Central	0.055608	21.8618	24.0298	26.6752	0.000437649	0.000601312	0.00080101	18.4618	20.6298	23.2752	0.000369585	0.000516232	0.000698914	25.2618	27.4298	30.0752	0.000505713	0.000686392	0.000903106
RGU298516N0923194E	RGS298516N0923194E	Active	Central	0.0326722	12.7561	14.0211	15.5646	0.000150037	0.000206145	0.000274606	9.35608	10.6211	12.1646	0.000110046	0.000156156	0.00021462	16.1561	17.4211	18.9646	0.000190028	0.000256133	0.000334592
RGU298082N0923236E	RGS298082N0923236E	Active	Central	0.134597	11.216	12.3283	13.6854	0.000543472	0.000746709	0.000994694	7.81599	8.92827	10.2854	0.000378725	0.000540775	0.000747573	14.616	15.7283	17.0854	0.000708219	0.000952643	0.00124181
RGU293721N0924556E	RGS293721N0924556E	Transitional	Central	0.0931266	15.4252	16.9549	18.8213	0.000517137	0.000710527	0.000946495	12.0252	13.5549	15.4213	0.00040315	0.000568043	0.000775514	18.8252	20.3549	22.2213	0.000631124	0.00085301	0.00111748
RGU293515N0924685E	RGS293515N0924685E	Active	Central	0.0261831	10.9518	12.0379	13.3631	0.000103231	0.000141836	0.00018894	7.55183	8.63791	9.96312	7.1183e-05	0.000101775	0.000140867	14.3518	15.4379	16.7631	0.000135279	0.000181896	0.000237012
RGU293484N0924689E	RGS293484N0924689E	Active	Central	0.0554098	19.0155	20.9012	23.2021	0.000379311	0.000521159	0.000694238	15.6155	17.5012	19.8021	0.00031149	0.000436382	0.000592506	22.4155	24.3012	26.6021	0.000447133	0.000605936	0.00079597
RGU293453N0924703E	RGS293599N0924736E	Active	Central	0.128508	11.4721	12.6097	13.9979	0.000530732	0.000729205	0.000971377	8.07207	9.20975	10.5979	0.000373438	0.000532588	0.000735436	14.8721	16.0097	17.3979	0.000688026	0.000925823	0.00120732
RGU293451N0924738E	RGS293599N0924736E	Active	Central	0.137843	19.8173	21.7826	24.1805	0.000983403	0.00135116	0.00179988	16.4173	18.3826	20.7805	0.000814683	0.00114026	0.0015468	23.2173	25.1826	27.5805	0.00115212	0.00156206	0.00205296
RGU293604N0924752E	RGS293604N0924752E	Active	Central	0.0852264	11.2642	12.3813	13.7443	0.000345603	0.000474845	0.000632542	7.8642	8.98126	10.3443	0.000241286	0.000344448	0.000476067	14.6642	15.7813	17.1443	0.00044992	0.000605241	0.000789018
RGU293635N0924786E	RGS293635N0924786E	Active	Central	0.0711329	13.6979	15.0563	16.7138	0.000350773	0.000481949	0.000642006	10.2979	11.6563	13.3138	0.000263707	0.000373115	0.000511406	17.0979	18.4563	20.1138	0.00043784	0.000590782	0.000772606
RGU293775N0924677E	RGS293775N0924677E	Active	Central	0.0199466	12.7502	14.0146	15.5574	9.15565e-05	0.000125795	0.000167572	9.3502	10.6146	12.1574	6.71418e-05	9.52768e-05	0.00013095	16.1502	17.4146	18.9574	0.000115971	0.000156313	0.000204194
RGU293825N0924620E	RGS293807N0924785E	Active	Central	0.151693	18.546	20.3852	22.6294	0.00101279	0.00139153	0.00185367	15.146	16.9852	19.2294	0.000827117	0.00115944	0.00157516	21.946	23.7852	26.0294	0.00119846	0.00162362	0.00213217
RGU293649N0924521E	RGS293807N0924785E	Active	Central	0.0581482	14.9685	16.4529	18.2641	0.00031334	0.000430517	0.000573493	11.5685	13.0529	14.8641	0.000242167	0.00034155	0.000466733	18.3685	19.8529	21.6641	0.000384513	0.000519484	0.000680253
RGU293765N0924818E	RGS293807N0924785E	Active	Central	0.0164385	13.7503	15.1139	16.7777	8.13722e-05	0.000111802	0.000148932	10.3503	11.7139	13.3777	6.12515e-05	8.66514e-05	0.000118751	17.1503	18.5139	20.1777	0.000101493	0.000136953	0.000179113
RGU293817N0924794E	RGS293807N0924785E	Active	Central	0.0998262	13.568	14.9135	16.5553	0.000487599	0.000669941	0.000892431	10.168	11.5135	13.1553	0.000365411	0.000517207	0.00070915	16.968	18.3135	19.9553	0.000609786	0.000822676	0.00107571
RGU293790N0924821E	RGS293807N0924785E	Active	Central	0.0269897	9.72594	10.6905	11.8673	9.44999e-05	0.000129839	0.000172959	6.32594	7.29045	8.46732	6.14646e-05	8.85451e-05	0.000123406	13.1259	14.0905	15.2673	0.000127535	0.000171133	0.000222512
RGU293782N0924788E	RGS293782N0924788E	Transitional	Central	0.0371896	10.9153	11.9977	13.3185	0.000146137	0.000200786	0.000267468	7.51529	8.59774	9.91853	0.000100617	0.000143886	0.000199188	14.3153	15.3977	16.7185	0.000191657	0.000257686	0.000335748
RGU293976N0924729E	RGS293274N0924501E	Active	Central	0.0422508	14.9552	16.4383	18.2479	0.000227473	0.00031254	0.000416335	11.5552	13.0383	14.8479	0.000175758	0.000247896	0.000338763	18.3552	19.8383	21.6479	0.000279188	0.000377183	0.000493908
RGU293870N0924598E	RGS293274N0924501E	Active	Central	0.0105149	16.6083	18.2553	20.265	6.28683e-05	8.63786e-05	0.000115065	13.2083	14.8553	16.865	4.99981e-05	7.02908e-05	9.57599e-05	20.0083	21.6553	23.665	7.57385e-05	0.000102466	0.000134371
RGU293271N0924502E	RGS293271N0924502E	Active	Central	0.0154625	9.40749	10.3404	11.4788	5.23669e-05	7.19501e-05	9.5845e-05	6.00749	6.94043	8.07876	3.34408e-05	4.82924e-05	6.74558e-05	12.8075	13.7404	14.8788	7.1293e-05	9.56078e-05	0.000124234
RGU293270N0924520E	RGS293270N0924520E	Active	Central	0.0483888	18.1424	19.9415	22.1368	0.000316039	0.000434226	0.000578433	14.7424	16.5415	18.7368	0.000256811	0.000360191	0.000489592	21.5424	23.3415	25.5368	0.000375267	0.000508261	0.000667275
RGU293286N0924535E	RGS293286N0924535E	Active	Central	0.033024	9.46478	10.4034	11.5487	0.000112523	0.000154603	0.000205947	6.06478	7.00339	8.14866	7.21019e-05	0.000104076	0.000145315	12.8648	13.8034	14.9487	0.000152945	0.000205129	0.000266579
RGU293300N0924518E	RGS293300N0924518E	Active	Central	0.113009	13.6149	14.9651	16.6125	0.000553896	0.000761032	0.00101377	10.2149	11.5651	13.2125	0.000415573	0.000588128	0.000806289	17.0149	18.3651	20.0125	0.000692218	0.000933935	0.00122126
RGU292979N0924514E	RGS292979N0924514E	Active	Central	0.0990283	13.3283	14.65	16.2628	0.000475155	0.000652845	0.000869657	9.92827	11.25	12.8628	0.000353945	0.000501332	0.000687841	16.7283	18.05	19.6628	0.000596366	0.000804358	0.00105147
RGU293027N0924502E	RGS293027N0924502E	Active	Central	0.140136	15.3022	16.8197	18.6714	0.000771984	0.00106068	0.00141293	11.9022	13.4197	15.2714	0.000600457	0.000846267	0.00115564	18.7022	20.2197	22.0714	0.000943511	0.00127508	0.00167022
RGU293152N0924533E	RGS293152N0924533E	Active	Central	0.0591948	9.36038	10.2886	11.4213	0.000199471	0.000274065	0.000365083	5.96038	6.88864	8.02127	0.000127016	0.000183497	0.000256401	12.7604	13.6886	14.8213	0.000271925	0.000364633	0.000473765
RGU293008N0924770E	RGS293008N0924770E	Active	Central	0.117769	13.1594	14.4644	16.0568	0.000557918	0.000766558	0.00102113	9.75942	11.0644	12.6568	0.000413769	0.000586372	0.000804911	16.5594	17.8644	19.4568	0.000702068	0.000946745	0.00123736
RGU292991N0924740E	RGS292991N0924740E	Active	Central	0.186446	11.0687	12.1663	13.5057	0.000742936	0.00102077	0.00135976	7.66868	8.76635	10.1057	0.000514726	0.000735503	0.00101745	14.4687	15.5663	16.9057	0.000971146	0.00130603	0.00170208
RGU293108N0924691E	RGS293108N0924691E	Active	Central	0.0322199	12.9383	14.2214	15.787	0.000150074	0.000206195	0.000274674	9.53833	10.8214	12.387	0.000110637	0.000156899	0.000215518	16.3383	17.6214	19.187	0.000189511	0.000255492	0.000333829
RGU293070N0924681E	RGS293070N0924681E	Active	Central	0.0661565	15.8862	17.4616	19.3838	0.00037835	0.000519838	0.000692479	12.4862	14.0616	15.9838	0.000297375	0.000418619	0.000571015	19.2862	20.8616	22.7838	0.000459326	0.000621058	0.000813942
RGU293153N0924678E	RGS293153N0924678E	Active	Central	0.0501153	13.5868	14.9341	16.5782	0.000245126	0.000336793	0.000448644	10.1868	11.5341	13.1782	0.000183785	0.000260117	0.000356632	16.9868	18.3341	19.9782	0.000306467	0.00041347	0.000540655
RGU293252N0924659E	RGS293252N0924659E	Active	Central	0.0453984	14.4401	15.8721	17.6194	0.000236	0.000324256	0.000431942	11.0401	12.4721	14.2194	0.000180433	0.000254796	0.00034859	17.8401	19.2721	21.0194	0.000291568	0.000393715	0.000515293
RGU293335N0924638E	RGS293335N0924638E	Active	Central	0.0304735	11.5474	12.6926	14.0898	0.000126681	0.000174054	0.000231858	8.14743	9.29257	10.6898	8.9381e-05	0.00012743	0.000175909	14.9474	16.0926	17.4898	0.00016398	0.000220679	0.000287807
RGU293313N0924638E	RGS293313N0924638E	Active	Central	0.022752	10.2833	11.3031	12.5474	8.42275e-05	0.000115725	0.000154158	6.88329	7.90307	9.14738	5.6379e-05	8.09147e-05	0.000112385	13.6833	14.7031	15.9474	0.000112076	0.000150536	0.000195931
RGU293290N0924652E	RGS293290N0924652E	Active	Central	0.0292032	10.6162	11.669	12.9536	0.00011161	0.000153347	0.000204275	7.21618	8.26898	9.55357	7.5865e-05	0.000108667	0.000150658	14.0162	15.069	16.3536	0.000147355	0.000198028	0.000257892
RGU293354N0924641E	RGS293354N0924641E	Active	Central	0.240616	25.6956	28.2439	31.3531	0.0022258	0.00305817	0.00407379	22.2956	24.8439	27.9531	0.00193129	0.00269002	0.00363202	29.0956	31.6439	34.7531	0.00252032	0.00342631	0.00451557
RGU293363N0924651E	RGS293363N0924651E	Active	Central	0.0857139	12.3382	13.5618	15.0547	0.00038072	0.000523094	0.000696815	8.9382	10.1618	11.6547	0.000275806	0.000391952	0.000539445	15.7382	16.9618	18.4547	0.000485633	0.000654236	0.000854186
RGU293349N0924702E	RGS293349N0924702E	Active	Central	0.048958	11.2795	12.3981	13.7629	0.0001988	0.000273143	0.000363855	7.87948	8.99806	10.3629	0.000138875	0.000198237	0.000273968	14.6795	15.7981	17.1629	0.000258724	0.000348049	0.000453742
RGU293363N0924747E	RGS293363N0924747E	Active	Central	0.12847	17.4625	19.1942	21.3072	0.000807624	0.00110964	0.00147816	14.0625	15.7942	17.9072	0.000650376	0.000913085	0.00124229	20.8625	22.5942	24.7072	0.000964871	0.0013062	0.00171403
RGU293328N0924747E	RGS293328N0924747E	Active	Central	0.0947119	11.3335	12.4574	13.8288	0.00038643	0.00053094	0.000707267	7.9335	9.05743	10.4288	0.000270503	0.000386031	0.000533376	14.7335	15.8574	17.2288	0.000502358	0.000675849	0.000881158
RGU293321N0924818E	RGS293321N0924818E	Active	Central	0.0625399	18.5803	20.4229	22.6712	0.000418325	0.000574762	0.000765642	15.1803	17.0229	19.2712	0.000341776	0.000479076	0.000650819	21.9803	23.8229	26.0712	0.000494874	0.000670448	0.000880465
RGU293188N0924812E	RGS293188N0924812E	Active	Central	0.0599514	12.6226	13.8743	15.4017	0.000272427	0.000374304	0.000498611	9.22256	10.4743	12.0017	0.000199046	0.000282578	0.00038854	16.0226	17.2743	18.8017	0.000345807	0.000466029	0.000608682
RGU292894N0924833E	RGS292894N0924833E	Active	Central	0.0777809	11.4097	12.5412	13.9218	0.000319484	0.000438959	0.000584739	8.0097	9.14119	10.5218	0.000224281	0.000319954	0.000441933	14.8097	15.9412	17.3218	0.000414688	0.000557964	0.000727545
RGU292966N0924681E	RGS292966N0924681E	Active	Central	0.0610926	10.0381	11.0336	12.2482	0.000220772	0.000303332	0.000404069	6.63813	7.6336	8.84824	0.000145994	0.00020986	0.000291903	13.4381	14.4336	15.6482	0.000295549	0.000396803	0.000516235
RGU292993N0924686E	RGS292993N0924686E	Active	Central	0.0712863	10.8513	11.9274	13.2404	0.000278477	0.000382617	0.000509686	7.45129	8.5274	9.84044	0.000191223	0.000273549	0.000378804	14.2513	15.3274	16.6404	0.000365732	0.000491685	0.000640567
RGU292809N0924764E	RGS292809N0924764E	Active	Central	0.0420766	10.7057	11.7674	13.0628	0.000162166	0.00022281	0.000296806	7.30573	8.36741	9.66284	0.000110664	0.000158433	0.000219553	14.1057	15.1674	16.4628	0.000213668	0.000287187	0.000374058
RGU292846N0924592E	RGS292846N0924592E	Active	Central	0.0475641	11.3265	12.4498	13.8203	0.000193945	0.000266473	0.000354969	7.92653	9.04977	10.4203	0.000135727	0.0001937	0.000267642	14.7265	15.8498	17.2203	0.000252163	0.000339246	0.000442297
RGU292831N0924541E	RGS292831N0924541E	Active	Central	0.0277476	12.7421	14.0058	15.5476	0.000127283	0.000174882	0.000232961	9.34213	10.6058	12.1476	9.33198e-05	0.000132428	0.000182016	16.1421	17.4058	18.9476	0.000161246	0.000217336	0.000283905
RGU292832N0924515E	RGS292832N0924515E	Active	Central	0.0425566	11.4027	12.5335	13.9133	0.000174694	0.000240023	0.000319735	8.00272	9.13352	10.5133	0.000122605	0.000174911	0.000241601	14.8027	15.9335	17.3133	0.000226783	0.000305134	0.000397869
RGU292969N0924564E	RGS292969N0924564E	Active	Central	0.0218189	10.8034	11.8747	13.182	8.48586e-05	0.000116592	0.000155313	7.40339	8.47475	9.78199	5.81522e-05	8.32094e-05	0.000115254	14.2034	15.2747	16.582	0.000111565	0.000149975	0.000195373
RGU292917N0924612E	RGS292917N0924612E	Active	Central	0.209094	10.2065	11.2187	12.4537	0.000768285	0.00105559	0.00140616	6.80651	7.81868	9.0537	0.000512353	0.000735679	0.00102226	13.6065	14.6187	15.8537	0.00102422	0.00137551	0.00179006
RGU292965N0924616E	RGS292965N0924616E	Active	Central	0.141154	17.8099	19.5761	21.7312	0.000905017	0.00124346	0.00165641	14.4099	16.1761	18.3312	0.000732245	0.00102749	0.00139726	21.2099	22.9761	25.1312	0.00107779	0.00145942	0.00191557
RGU293559N0924741E	RGS293559N0924741E	Active	Central	0.051347	15.2672	16.7813	18.6287	0.000282214	0.000387751	0.000516524	11.8672	13.3813	15.2287	0.000219365	0.00030919	0.000422251	18.6672	20.1813	22.0287	0.000345062	0.000466312	0.000610797
RGU294258N0924511E	RGS294258N0924511E	Active	Central	0.067485	17.979	19.762	21.9375	0.000436793	0.000600137	0.000799445	14.579	16.362	18.5375	0.000354192	0.000496885	0.000675542	21.379	23.162	25.3375	0.000519395	0.000703389	0.000923347
RGU294338N0924540E	RGS294338N0924540E	Transitional	Central	0.0714737	16.0059	17.5932	19.53	0.000411841	0.000565853	0.000753775	12.6059	14.1932	16.13	0.000324357	0.000456499	0.000622549	19.4059	20.9932	22.93	0.000499325	0.000675208	0.000885001
RGU294573N0924568E	RGS294573N0924568E	Transitional	Central	0.0493075	15.0235	16.5134	18.3313	0.000266678	0.000366405	0.000488089	11.6235	13.1134	14.9313	0.000206325	0.000290964	0.000397561	18.4235	19.9134	21.7313	0.00032703	0.000441845	0.000578618
RGU294598N0924595E	RGS294598N0924595E	Transitional	Central	0.0152605	13.0364	14.3292	15.9067	7.16194e-05	9.84023e-05	0.000131082	9.63642	10.9292	12.5067	5.29405e-05	7.50537e-05	0.000103064	16.4364	17.7292	19.3067	9.02983e-05	0.000121751	0.0001591
RGU294614N0924627E	RGS294614N0924627E	Active	Central	0.01041	16.7358	18.3955	20.4206	6.27188e-05	8.61732e-05	0.000114792	13.3358	14.9955	17.0206	4.9977e-05	7.0246e-05	9.5679e-05	20.1358	21.7955	23.8206	7.54606e-05	0.0001021	0.000133904
RGU294591N0924609E	RGS294591N0924609E	Active	Central	0.0799729	20.0344	22.0212	24.4455	0.000576796	0.000792495	0.00105569	16.6344	18.6212	21.0455	0.000478909	0.000670137	0.000908856	23.4344	25.4212	27.8455	0.000674683	0.000914854	0.00120252
RGU294631N0924586E	RGS294631N0924586E	Active	Central	0.028208	19.6911	21.6439	24.0266	0.000199961	0.000274739	0.00036598	16.2911	18.2439	20.6266	0.000165435	0.000231581	0.000314191	23.0911	25.0439	27.4266	0.000234488	0.000317897	0.00041777
RGU294534N0924652E	RGS294534N0924652E	Active	Central	0.0390504	18.9463	20.8252	23.1177	0.000266349	0.000365953	0.000487488	15.5463	17.4252	19.7177	0.000218552	0.000306206	0.000415791	22.3463	24.2252	26.5177	0.000314147	0.000425701	0.000559184
RGU294511N0924671E	RGS294511N0924671E	Active	Central	0.0563132	15.569	17.113	18.9969	0.000315627	0.000433659	0.000577679	12.169	13.713	15.5969	0.0002467	0.0003475	0.000474288	18.969	20.513	22.3969	0.000384554	0.000519819	0.00068107
RGU294485N0924636E	RGS294485N0924636E	Active	Central	0.301815	19.8865	21.8587	24.265	0.00216074	0.00296878	0.00395472	16.4865	18.4587	20.865	0.00179132	0.002507	0.00340058	23.2865	25.2587	27.665	0.00253016	0.00343055	0.00450885
RGU294471N0924620E	RGS294471N0924620E	Active	Central	0.0418277	12.96	14.2453	15.8135	0.000195152	0.000268131	0.000357179	9.56004	10.8453	12.4135	0.000143955	0.000204135	0.000280383	16.36	17.6453	19.2135	0.000246349	0.000332128	0.000433975
RGU294407N0924599E	RGS294407N0924599E	Active	Central	0.0176308	14.7921	16.2591	18.049	9.38868e-05	0.000128997	0.000171837	11.3921	12.8591	14.649	7.23067e-05	0.000102022	0.000139467	18.1921	19.6591	21.449	0.000115467	0.000155972	0.000204207
RGU294336N0924584E	RGS294336N0924584E	Active	Central	0.0174682	26.591	29.228	32.4456	0.000167219	0.000229753	0.000306054	23.191	25.828	29.0456	0.000145838	0.000203026	0.000273983	29.991	32.628	35.8456	0.0001886	0.000256479	0.000338126
RGU294308N0924581E	RGS294308N0924581E	Active	Central	0.072369	18.1574	19.9581	22.1552	0.000473053	0.000649956	0.000865809	14.7574	16.5581	18.7552	0.000384473	0.000539232	0.00073294	21.5574	23.3581	25.5552	0.000561633	0.000760681	0.000998678
RGU294323N0924645E	RGS294323N0924645E	Active	Central	0.186021	18.7538	20.6135	22.8828	0.00125589	0.00172555	0.00229861	15.3538	17.2135	19.4828	0.0010282	0.00144094	0.00195707	22.1538	24.0135	26.2828	0.00148358	0.00201016	0.00264014
RGU294526N0924598E	RGS294526N0924598E	Transitional	Central	0.0457373	16.9011	18.5772	20.6222	0.000278283	0.000382351	0.00050933	13.5011	15.1772	17.2222	0.000222301	0.000312373	0.000425357	20.3011	21.9772	24.0222	0.000334266	0.000452329	0.000593304
RGU294376N0924690E	RGS294376N0924690E	Transitional	Central	0.0283887	12.605	13.855	15.3803	0.000128822	0.000176997	0.000235778	9.20501	10.455	11.9803	9.40746e-05	0.000133562	0.000183657	16.005	17.255	18.7803	0.00016357	0.000220432	0.0002879
RGU294448N0924679E	RGS294448N0924679E	Active	Central	0.0428138	16.9495	18.6303	20.6812	0.000261241	0.000358935	0.000478139	13.5495	15.2303	17.2812	0.000208837	0.00029343	0.000399533	20.3495	22.0303	24.0812	0.000313645	0.00042444	0.000556745
RGU294324N0924693E	RGS294324N0924693E	Active	Central	0.0181943	14.0053	15.3942	17.0888	9.17337e-05	0.000126038	0.000167896	10.6053	11.9942	13.6888	6.94639e-05	9.82013e-05	0.000134492	17.4053	18.7942	20.4888	0.000114003	0.000153876	0.000201301
RGU294697N0924639E	RGS294697N0924639E	Active	Central	0.0360453	9.79813	10.7698	11.9554	0.000127144	0.00017469	0.000232706	6.39813	7.3698	8.55541	8.30242e-05	0.000119541	0.000166527	13.1981	14.1698	15.3554	0.000171263	0.00022984	0.000298885
RGU294647N0924649E	RGS294647N0924649E	Transitional	Central	0.0421079	12.6676	13.9238	15.4566	0.000192026	0.000263836	0.000351457	9.26757	10.5238	12.0566	0.000140486	0.000199411	0.000274147	16.0676	17.3238	18.8566	0.000243566	0.000328261	0.000428767
RGU294581N0924687E	RGS294581N0924687E	Active	Central	0.111117	14.6349	16.0862	17.8571	0.000585427	0.000804354	0.00107148	11.2349	12.6862	14.4571	0.000449419	0.000634344	0.000867471	18.0349	19.4862	21.2571	0.000721434	0.000974363	0.00127549
RGU294446N0924799E	RGS294446N0924799E	Active	Central	0.413425	16.5432	18.1838	20.1856	0.00246218	0.00338294	0.00450643	13.1432	14.7838	16.7856	0.00195615	0.0027504	0.00374738	19.9432	21.5838	23.5856	0.00296821	0.00401548	0.00526547
RGU294481N0924757E	RGS294481N0924757E	Active	Central	0.0621679	14.2098	15.619	17.3384	0.000318022	0.00043695	0.000582063	10.8098	12.219	13.9384	0.000241929	0.000341833	0.000467922	17.6098	19.019	20.7384	0.000394116	0.000532067	0.000696203
RGU294644N0925231E	RGS294644N0925231E	Active	Central	0.0367818	13.9985	15.3867	17.0805	0.00018536	0.000254677	0.000339257	10.5985	11.9867	13.6805	0.000140339	0.000198401	0.000271725	17.3985	18.7867	20.4805	0.000230381	0.000310954	0.000406788
RGU294105N0925111E	RGS294105N0925111E	Active	Central	0.110019	15.0623	16.556	18.3786	0.000596569	0.000819663	0.00109188	11.6623	13.156	14.9786	0.000461906	0.000651334	0.000889881	18.4623	19.956	21.7786	0.000731232	0.000987992	0.00129387
RGU294069N0925114E	RGS294069N0925114E	Active	Central	0.0846164	15.0122	16.501	18.3175	0.000457301	0.000628313	0.000836978	11.6122	13.101	14.9175	0.00035373	0.00049885	0.000681623	18.4122	19.901	21.7175	0.000560871	0.000757777	0.000992334
RGU294041N0925128E	RGS294041N0925128E	Active	Central	0.0890189	22.4607	24.6881	27.4059	0.000719793	0.000988967	0.00131741	19.0607	21.2881	24.0059	0.000610834	0.000852768	0.00115397	25.8607	28.0881	30.8059	0.000828752	0.00112517	0.00148085
RGU294080N0925139E	RGS294080N0925139E	Active	Central	0.387019	20.7708	22.8307	25.344	0.00289394	0.00397616	0.00529665	17.3708	19.4307	21.944	0.00242023	0.00338402	0.00458609	24.1708	26.2307	28.744	0.00336765	0.0045683	0.00600722
RGU294054N0925226E	RGS294054N0925226E	Active	Central	0.0930678	19.4392	21.367	23.7192	0.000651299	0.00089486	0.00119205	16.0392	17.967	20.3192	0.000537384	0.000752466	0.00102117	22.8392	24.767	27.1192	0.000765214	0.00103725	0.00136292
RGU294170N0925197E	RGS294170N0925197E	Active	Central	0.0509888	17.2172	18.9246	21.0079	0.000316038	0.000434223	0.00057843	13.8172	15.5246	17.6079	0.000253627	0.000356211	0.000484815	20.6172	22.3246	24.4079	0.000378448	0.000512236	0.000672046
RGU294131N0925120E	RGS294131N0925120E	Active	Central	0.104077	14.2188	15.6289	17.3494	0.000532745	0.000731971	0.000975061	10.8188	12.2289	13.9494	0.000405355	0.000572734	0.000783976	17.6188	19.0289	20.7494	0.000660135	0.000891208	0.00116615
RGU294252N0924958E	RGS294252N0924958E	Active	Central	0.111363	17.2261	18.9344	21.0188	0.000690606	0.000948866	0.00126399	13.8261	15.5344	17.6188	0.000554298	0.00077848	0.00105952	20.6261	22.3344	24.4188	0.000826914	0.00111925	0.00146845
RGU293551N0925124E	RGS293551N0925124E	Active	Central	0.41971	17.063	18.7551	20.8198	0.00257815	0.00354227	0.00471867	13.663	15.3551	17.4198	0.00206442	0.00290012	0.00394808	20.463	22.1551	24.2198	0.00309187	0.00418443	0.00548926
RGU293502N0925111E	RGS293502N0925111E	Active	Central	0.0567435	12.4986	13.7381	15.2504	0.000255317	0.000350796	0.000467296	9.09859	10.3381	11.8504	0.000185863	0.000263978	0.000363115	15.8986	17.1381	18.6504	0.000324771	0.000437613	0.000571477
RGU293436N0925110E	RGS293436N0925110E	Active	Central	0.051117	15.9146	17.4928	19.4185	0.000292862	0.00040238	0.000536012	12.5146	14.0928	16.0185	0.000230294	0.000324171	0.000442162	19.3146	20.8928	22.8185	0.000355429	0.000480589	0.000629863
RGU293363N0925057E	RGS293363N0925057E	Active	Central	0.246764	11.5907	12.7401	14.1426	0.00102966	0.00141471	0.00188454	8.19067	9.3401	10.7426	0.000727619	0.00103716	0.00143148	14.9907	16.1401	17.5426	0.0013317	0.00179226	0.0023376
RGU293389N0925059E	RGS293389N0925059E	Active	Central	0.108617	12.892	14.1704	15.7304	0.000504105	0.00069262	0.000922642	9.49196	10.7704	12.3304	0.000371157	0.000526436	0.00072322	16.292	17.5704	19.1304	0.000637052	0.000858805	0.00112206
RGU293409N0925013E	RGS293409N0925013E	Active	Central	0.0517804	12.397	13.6264	15.1264	0.000231091	0.00031751	0.000422956	8.99696	10.2264	11.7264	0.000167712	0.000238286	0.000327887	15.797	17.0264	18.5264	0.00029447	0.000396734	0.000518025
RGU293303N0925151E	RGS293303N0925151E	Active	Central	0.0510639	21.0501	23.1376	25.6847	0.000386964	0.000531673	0.000708243	17.6501	19.7376	22.2847	0.000324461	0.000453545	0.00061449	24.4501	26.5376	29.0847	0.000449466	0.000609801	0.000801997
RGU293281N0925140E	RGS293281N0925140E	Active	Central	0.108319	20.4348	22.4613	24.934	0.000796855	0.00109485	0.00145845	17.0348	19.0613	21.534	0.000664272	0.000929119	0.00125958	23.8348	25.8613	28.334	0.000929438	0.00126058	0.00165732
RGU293260N0925132E	RGS293260N0925132E	Active	Central	0.135808	15.8302	17.4	19.3155	0.00077395	0.00106338	0.00141653	12.4302	14	15.9155	0.000607721	0.000855591	0.00116718	19.2302	20.8	22.7155	0.000940179	0.00127116	0.00166587
RGU293512N0925245E	RGS293512N0925245E	Active	Central	0.120682	12.7426	14.0062	15.5481	0.000553608	0.000760636	0.00101325	9.34257	10.6062	12.1481	0.000405893	0.000575993	0.000791674	16.1426	17.4062	18.9481	0.000701323	0.00094528	0.00123482
RGU293707N0925185E	RGS293707N0925185E	Active	Central	0.487215	14.2336	15.6451	17.3674	0.00249654	0.00343015	0.00456931	10.8336	12.2451	13.9674	0.00190019	0.00268471	0.00367478	17.6336	19.0451	20.7674	0.00309289	0.00417558	0.00546384
RGU293017N0925186E	RGS293017N0925186E	Active	Central	0.038382	12.8647	14.1404	15.6971	0.000177758	0.000244232	0.000325342	9.46466	10.7404	12.2971	0.000130778	0.000185508	0.000254873	16.2647	17.5404	19.0971	0.000224737	0.000302956	0.000395811
RGU292648N0925158E	RGS292648N0925158E	Active	Central	0.320321	18.0326	19.8209	22.0029	0.00207944	0.00285707	0.00380591	14.6326	16.4209	18.6029	0.00168737	0.00236698	0.0032178	21.4326	23.2209	25.4029	0.00247151	0.00334716	0.00439402
RGU292890N0925227E	RGS292890N0925227E	Active	Central	0.0283057	14.1953	15.603	17.3207	0.000144651	0.000198744	0.000264748	10.7953	12.203	13.9207	0.000110004	0.000155436	0.000212779	17.5953	19.003	20.7207	0.000179297	0.000242052	0.000316717
RGU292854N0925213E	RGS292854N0925213E	Transitional	Central	0.0519178	13.9293	15.3107	16.9962	0.000260345	0.000357703	0.000476498	10.5293	11.9107	13.5962	0.000196797	0.000278269	0.000381177	17.3293	18.7107	20.3962	0.000323892	0.000437137	0.000571819
RGU292899N0925103E	RGS292899N0925103E	Transitional	Central	0.0134047	10.2548	11.2717	12.5126	4.94864e-05	6.79924e-05	9.05729e-05	6.85476	7.87172	9.11258	3.3079e-05	4.74832e-05	6.59619e-05	13.6548	14.6717	15.9126	6.58938e-05	8.85016e-05	0.000115184
RGU293005N0925098E	RGS293005N0925098E	Active	Central	0.0347189	11.2326	12.3466	13.7057	0.000140395	0.000192897	0.000256958	7.83263	8.94656	10.3057	9.78986e-05	0.000139777	0.000193214	14.6326	15.7466	17.1057	0.000182891	0.000246017	0.000320702
RGU293084N0925177E	RGS293084N0925177E	Active	Central	0.076731	15.0006	16.4882	18.3033	0.000414364	0.00056932	0.000758393	11.6006	13.0882	14.9033	0.000320445	0.000451922	0.000617515	18.4006	19.8882	21.7033	0.000508283	0.000686719	0.000899271
RGU293149N0924982E	RGS293149N0924982E	Active	Central	0.0690461	9.7313	10.6963	11.8739	0.000241887	0.000332343	0.000442716	6.3313	7.29635	8.47386	0.000157375	0.000226703	0.000315947	13.1313	14.0963	15.2739	0.000326399	0.000437984	0.000569484
RGU293859N0924875E	RGS293859N0924875E	Transitional	Central	0.194308	11.3412	12.4659	13.8383	0.000793328	0.00109	0.001452	7.94123	9.06593	10.4383	0.000555495	0.000792711	0.00109525	14.7412	15.8659	17.2383	0.00103116	0.00138729	0.00180874
RGU294531N0925252E	RGS294531N0925252E	Active	Central	0.0429967	10.5787	11.6278	12.9079	0.000163746	0.000224981	0.000299697	7.17872	8.2278	9.50786	0.000111118	0.000159196	0.000220755	13.9787	15.0278	16.3079	0.000216374	0.000290765	0.000378639
RGU294567N0925148E	RGS294567N0925148E	Active	Central	0.203713	14.5203	15.9603	17.7173	0.00106487	0.00146309	0.00194899	11.1203	12.5603	14.3173	0.000815527	0.00115141	0.00157497	17.9203	19.3603	21.1173	0.00131422	0.00177477	0.00232301
RGU293600N0924946E	RGS293600N0924946E	Active	Central	0.197363	22.5815	24.8209	27.5533	0.00160443	0.00220442	0.00293652	19.1815	21.4209	24.1533	0.00136285	0.00190246	0.00257416	25.9815	28.2209	30.9533	0.001846	0.00250639	0.00329887
RGU293659N0924932E	RGS293659N0924932E	Active	Central	0.0382716	11.5243	12.6672	14.0617	0.00015878	0.000218157	0.000290608	8.12434	9.26719	10.6617	0.000111935	0.000159602	0.000220342	14.9243	16.0672	17.4617	0.000205624	0.000276713	0.000360875
RGU293622N0924965E	RGS293622N0924965E	Active	Central	0.0260742	15.1007	16.5982	18.4254	0.000141746	0.000194753	0.000259431	11.7007	13.1982	15.0254	0.000109831	0.00015486	0.000211559	18.5007	19.9982	21.8254	0.00017366	0.000234647	0.000307303
RGU293686N0925011E	RGS293686N0925011E	Transitional	Central	0.484391	18.6268	20.4739	22.7278	0.00324815	0.00446283	0.00594495	15.2268	17.0739	19.3278	0.00265526	0.00372171	0.00505561	22.0268	23.8739	26.1278	0.00384105	0.00520395	0.0068343
RGU293777N0924964E	RGS293777N0924964E	Active	Central	0.0280828	31.198	34.2918	38.0669	0.000315406	0.000433355	0.000577274	27.798	30.8918	34.6669	0.000281032	0.000390389	0.000525714	34.598	37.6918	41.4669	0.000349779	0.000476322	0.000628834
RGU294612N0924858E	RGS294612N0924858E	Transitional	Central	0.0267349	19.0087	20.8937	23.1938	0.00018295	0.000251366	0.000334846	15.6087	17.4937	19.7938	0.000150227	0.000210462	0.000285761	22.4087	24.2937	26.5938	0.000215674	0.000292271	0.000383931
RGU294588N0924747E	RGS294588N0924747E	Transitional	Central	0.0218989	14.0877	15.4848	17.1894	0.000111062	0.000152595	0.000203272	10.6877	12.0848	13.7894	8.42575e-05	0.000119089	0.000163065	17.4877	18.8848	20.5894	0.000137866	0.0001861	0.000243478
RGU294490N0924936E	RGS294490N0924936E	Active	Central	0.111184	16.7116	18.3689	20.391	0.000668901	0.000919043	0.00122426	13.3116	14.9689	16.991	0.000532812	0.000748932	0.00102013	20.1116	21.7689	23.791	0.000804989	0.00108915	0.00142839
RGU294484N0924925E	RGS294484N0924925E	Transitional	Central	0.0486046	14.3918	15.819	17.5605	0.000251823	0.000345994	0.0004609	10.9918	12.419	14.1605	0.000192331	0.000271629	0.000371662	17.7918	19.219	20.9605	0.000311315	0.000420359	0.000550138
RGU294602N0925331E	RGS294602N0925331E	Transitional	Central	0.0450713	16.2489	17.8603	19.8265	0.00026365	0.000362245	0.000482548	12.8489	14.4603	16.4265	0.000208483	0.000293286	0.000399797	19.6489	21.2603	23.2265	0.000318817	0.000431204	0.000565299
RGU294621N0925349E	RGS294621N0925349E	Active	Central	0.109924	15.9519	17.5338	19.464	0.000631257	0.000867323	0.00115536	12.5519	14.1338	16.064	0.00049671	0.000699139	0.000953543	19.3519	20.9338	22.864	0.000765804	0.00103551	0.00135718
RGU294633N0925393E	RGS294633N0925393E	Active	Central	0.120311	16.7259	18.3846	20.4085	0.000724433	0.000995342	0.0013259	13.3259	14.9846	17.0085	0.000577172	0.000811267	0.00110501	20.1259	21.7846	23.8085	0.000871693	0.00117942	0.00154679
RGU294568N0925564E	RGS294568N0925564E	Active	Central	0.0153635	14.8559	16.3291	18.1268	8.21658e-05	0.000112893	0.000150385	11.4559	12.9291	14.7268	6.33609e-05	8.93865e-05	0.000122177	18.2559	19.7291	21.5268	0.000100971	0.000136399	0.000178592
RGU294678N0925568E	RGS294678N0925568E	Active	Central	0.108627	10.5286	11.5727	12.8467	0.000411728	0.000565699	0.000753569	7.1286	8.17271	9.4467	0.000278769	0.000399499	0.00055413	13.9286	14.9727	16.2467	0.000544688	0.000731898	0.000953008
RGU294710N0925566E	RGS294710N0925566E	Active	Central	0.0295249	8.83008	9.70575	10.7742	9.38546e-05	0.000128953	0.000171778	5.43008	6.30575	7.37422	5.77161e-05	8.37795e-05	0.00011757	12.2301	13.1058	14.1742	0.000129993	0.000174126	0.000225986
RGU294577N0925526E	RGS294577N0925526E	Active	Central	0.105513	13.9247	15.3056	16.9905	0.000528922	0.000726718	0.000968063	10.5247	11.9056	13.5905	0.000399774	0.000565284	0.000774342	17.3247	18.7056	20.3905	0.000658069	0.000888152	0.00116178
RGU294608N0925486E	RGS294608N0925486E	Active	Central	0.0149189	8.89186	9.77366	10.8496	4.77565e-05	6.56156e-05	8.74067e-05	5.49186	6.37366	7.4496	2.94957e-05	4.27896e-05	6.00156e-05	12.2919	13.1737	14.2496	6.60173e-05	8.84415e-05	0.000114798
RGU294637N0925455E	RGS294637N0925455E	Active	Central	0.148474	20.3865	22.4082	24.875	0.00108967	0.00149716	0.00199438	16.9865	19.0082	21.475	0.000907938	0.00127	0.00172178	23.7865	25.8082	28.275	0.0012714	0.00172433	0.00226697
RGU294678N0925440E	RGS294678N0925440E	Active	Central	0.0223594	17.551	19.2915	21.4152	0.000141275	0.000194106	0.000258569	14.151	15.8915	18.0152	0.000113907	0.000159896	0.000217517	20.951	22.6915	24.8152	0.000168642	0.000228316	0.000299621
RGU294646N0925639E	RGS294646N0925639E	Active	Central	0.0112507	13.023	14.3145	15.8903	5.27466e-05	7.24717e-05	9.65398e-05	9.623	10.9145	12.4903	3.89757e-05	5.52581e-05	7.58835e-05	16.423	17.7145	19.2903	6.65174e-05	8.96853e-05	0.000117196
RGU294607N0925660E	RGS294607N0925660E	Transitional	Central	0.0306036	15.1702	16.6746	18.5103	0.000167135	0.000229636	0.000305899	11.7702	13.2746	15.1103	0.000129676	0.000182813	0.000249711	18.5702	20.0746	21.9103	0.000204593	0.00027646	0.000362087
RGU294603N0925681E	RGS294603N0925681E	Transitional	Central	0.0191843	8.8355	9.7117	10.7808	6.10212e-05	8.38407e-05	0.000111685	5.4355	6.3117	7.38083	3.75395e-05	5.44887e-05	7.6462e-05	12.2355	13.1117	14.1808	8.45028e-05	0.000113193	0.000146907
RGU294227N0925273E	RGS294227N0925273E	Active	Central	0.192359	12.4773	13.7147	15.2245	0.000864044	0.00118716	0.00158142	9.07732	10.3147	11.8245	0.000628597	0.000892854	0.00122825	15.8773	17.1147	18.6245	0.00109949	0.00148147	0.00193459
RGU294232N0925248E	RGS294232N0925248E	Active	Central	0.321503	19.9539	21.9327	24.3472	0.00230948	0.00317314	0.00422695	16.5539	18.5327	20.9472	0.00191597	0.00268124	0.00363668	23.3539	25.3327	27.7472	0.002703	0.00366504	0.00481723
RGU294215N0925393E	RGS294215N0925393E	Active	Central	0.0657206	15.0616	16.5553	18.3778	0.00035635	0.00048961	0.000652212	11.6616	13.1553	14.9778	0.000275908	0.000389058	0.000531549	18.4616	19.9553	21.7778	0.000436791	0.000590163	0.000772875
RGU294185N0925312E	RGS294185N0925312E	Active	Central	0.129827	20.8761	22.9464	25.4724	0.0009757	0.00134057	0.00178578	17.4761	19.5464	22.0724	0.000816792	0.00114194	0.00154742	24.2761	26.3464	28.8724	0.00113461	0.00153921	0.00202415
RGU294111N0925398E	RGS294111N0925398E	Active	Central	0.104641	16.3236	17.9424	19.9176	0.000614923	0.000844881	0.00112547	12.9236	14.5424	16.5176	0.000486842	0.000684779	0.000933347	19.7236	21.3424	23.3176	0.000743004	0.00100498	0.00131759
RGU294083N0925360E	RGS294083N0925360E	Active	Central	0.0442988	18.0456	19.8352	22.0188	0.000287784	0.000395404	0.00052672	14.6456	16.4352	18.6188	0.000233563	0.000327627	0.000445387	21.4456	23.2352	25.4188	0.000342006	0.000463182	0.000608052
RGU294073N0925334E	RGS294073N0925334E	Active	Central	0.0125801	42.5064	46.7217	51.8651	0.000192504	0.000264493	0.000352331	39.1064	43.3217	48.4651	0.000177106	0.000245245	0.000329234	45.9064	50.1217	55.2651	0.000207902	0.00028374	0.000375428
RGU293963N0925381E	RGS293963N0925381E	Active	Central	0.0986471	12.348	13.5726	15.0667	0.000438515	0.000602502	0.000802595	8.94802	10.1726	11.6667	0.000317771	0.000451572	0.000621479	15.748	16.9726	18.4667	0.000559259	0.000753432	0.000983711
RGU293956N0925356E	RGS293956N0925356E	Active	Central	0.0289368	13.31	14.6299	16.2405	0.000138653	0.000190504	0.000253771	9.90997	11.2299	12.8405	0.000103234	0.000146231	0.000200643	16.71	18.0299	19.6405	0.000174072	0.000234777	0.000306899
RGU293883N0925376E	RGS293883N0925376E	Active	Central	0.0199985	11.3182	12.4406	13.8101	8.14847e-05	0.000111957	0.000149138	7.91818	9.0406	10.4101	5.70065e-05	8.13591e-05	0.000112421	14.7182	15.8406	17.2101	0.000105963	0.000142554	0.000185855
RGU293761N0925620E	RGS293761N0925620E	Active	Central	0.120246	20.0836	22.0753	24.5055	0.000869394	0.00119451	0.00159121	16.6836	18.6753	21.1055	0.000722212	0.00101054	0.00137044	23.4836	25.4753	27.9055	0.00101658	0.00137849	0.00181199
RGU293802N0925719E	RGS293802N0925719E	Active	Central	0.0588261	18.4405	20.2693	22.5006	0.000390522	0.000536563	0.000714757	15.0405	16.8693	19.1006	0.000318519	0.000446559	0.000606752	21.8405	23.6693	25.9006	0.000462526	0.000626567	0.000822762
RGU293911N0925625E	RGS293911N0925625E	Active	Central	0.040698	13.7957	15.1638	16.8331	0.000202125	0.000277712	0.000369941	10.3957	11.7638	13.4331	0.000152311	0.000215444	0.000295219	17.1957	18.5638	20.2331	0.000251939	0.00033998	0.000444662
RGU293966N0925661E	RGS293966N0925661E	Active	Central	0.0550264	14.8104	16.2792	18.0713	0.000293388	0.000403103	0.000536975	11.4104	12.8792	14.6713	0.000226035	0.000318913	0.000435946	18.2104	19.6792	21.4713	0.00036074	0.000487294	0.000638004
RGU293995N0925655E	RGS293995N0925655E	Active	Central	0.140062	16.2618	17.8744	19.8422	0.000819953	0.00112658	0.00150073	12.8618	14.4744	16.4422	0.000648518	0.00091229	0.00124357	19.6618	21.2744	23.2422	0.000991389	0.00134088	0.00175788
RGU293981N0925718E	RGS293981N0925718E	Active	Central	0.0704106	14.6178	16.0675	17.8363	0.00037053	0.000509094	0.000678166	11.2178	12.6675	14.4363	0.000284348	0.000401366	0.000548892	18.0178	19.4675	21.2363	0.000456713	0.000616822	0.00080744
RGU294054N0925709E	RGS294054N0925709E	Active	Central	0.0342559	12.3986	13.6282	15.1285	0.000152901	0.000210081	0.000279849	8.99863	10.2282	11.7285	0.000110972	0.000157669	0.000216955	15.7986	17.0282	18.5285	0.000194831	0.000262492	0.000342743
RGU293461N0925254E	RGS293461N0925254E	Active	Central	0.0486842	12.1833	13.3915	14.8658	0.000213529	0.00029338	0.000390812	8.78333	9.99153	11.4658	0.000153939	0.000218893	0.000301428	15.5833	16.7915	18.2658	0.000273118	0.000367867	0.000480197
RGU293519N0925334E	RGS293519N0925334E	Active	Central	0.0793668	18.9172	20.7931	23.0822	0.000540502	0.000742629	0.000989258	15.5172	17.3931	19.6822	0.000443357	0.000621198	0.000843541	22.3172	24.1931	26.4822	0.000637647	0.00086406	0.00113498
RGU293497N0925338E	RGS293497N0925338E	Active	Central	0.0427718	13.7757	15.1418	16.8087	0.000212116	0.000291439	0.000388227	10.3757	11.7418	13.4087	0.000159763	0.000225998	0.000309698	17.1757	18.5418	20.2087	0.000264469	0.00035688	0.000466756
RGU293838N0925276E	RGS293838N0925276E	Active	Central	0.0518661	13.3964	14.7249	16.3459	0.000250135	0.000343676	0.000457812	9.99642	11.3249	12.9459	0.000186651	0.000264321	0.000362586	16.7964	18.1249	19.7459	0.00031362	0.000423032	0.000553039
RGU293792N0925317E	RGS293792N0925317E	Active	Central	0.109218	14.1676	15.5725	17.2869	0.000557044	0.000765358	0.00101954	10.7676	12.1725	13.8869	0.000423362	0.000598255	0.000819012	17.5676	18.9725	20.6869	0.000690727	0.00093246	0.00122006
RGU293786N0925341E	RGS293786N0925341E	Active	Central	0.0285422	9.78472	10.7551	11.939	0.00010054	0.000138138	0.000184014	6.38472	7.35506	8.53905	6.56043e-05	9.44684e-05	0.000131611	13.1847	14.1551	15.339	0.000135476	0.000181808	0.000236418
RGU293844N0925470E	RGS293844N0925470E	Active	Central	0.0319822	14.6118	16.0609	17.8289	0.000168235	0.000231148	0.000307913	11.2118	12.6609	14.4289	0.000129088	0.000182215	0.000249194	18.0118	19.4609	21.2289	0.000207381	0.000280081	0.000366632
RGU293323N0925537E	RGS293323N0925537E	Active	Central	0.0256159	13.9593	15.3436	17.0328	0.000128729	0.000176869	0.000235607	10.5593	11.9436	13.6328	9.73752e-05	0.000137676	0.000188577	17.3593	18.7436	20.4328	0.000160083	0.000216061	0.000282638
RGU293194N0925258E	RGS293194N0925258E	Active	Central	0.0669378	18.5046	20.3397	22.5788	0.000445917	0.000612672	0.000816143	15.1046	16.9397	19.1788	0.000363985	0.000510258	0.000693245	21.9046	23.7397	25.9788	0.000527849	0.000715087	0.000939041
RGU293494N0925479E	RGS293494N0925479E	Active	Central	0.0969073	14.0985	15.4966	17.2026	0.000491848	0.00067578	0.000900209	10.6985	12.0966	13.8026	0.000373233	0.000527512	0.000722287	17.4985	18.8966	20.6026	0.000610462	0.000824048	0.00107813
RGU293511N0925496E	RGS293511N0925496E	Active	Central	0.0688604	12.5919	13.8406	15.3643	0.000312149	0.000428881	0.000571314	9.19188	10.4406	11.9643	0.000227864	0.000323525	0.000444886	15.9919	17.2406	18.7643	0.000396435	0.000534238	0.000697742
RGU293532N0925492E	RGS293532N0925492E	Active	Central	0.0867229	15.6882	17.244	19.1423	0.00048979	0.000672952	0.000896441	12.2882	13.844	15.7423	0.000383641	0.000540266	0.000737218	19.0882	20.644	22.5423	0.000595938	0.000805638	0.00105566
RGU293333N0925746E	RGS293333N0925746E	Active	Central	0.0262241	15.2917	16.8082	18.6586	0.000144364	0.000198351	0.000264224	11.8917	13.4082	15.2586	0.000112266	0.000158228	0.000216077	18.6917	20.2082	22.0586	0.000176463	0.000238474	0.000312372
RGU293076N0925701E	RGS293076N0925701E	Active	Central	0.0871531	11.7303	12.8936	14.313	0.000368041	0.000505673	0.000673609	8.33033	9.49362	10.913	0.000261365	0.000372329	0.000513596	15.1303	16.2936	17.713	0.000474716	0.000639018	0.000833622
RGU293021N0925690E	RGS293021N0925690E	Active	Central	0.146021	18.2178	20.0245	22.2289	0.000957665	0.00131579	0.00175277	14.8178	16.6245	18.8289	0.000778936	0.00109238	0.00148468	21.6178	23.4245	25.6289	0.00113639	0.00153921	0.00202087
RGU292743N0925470E	RGS292743N0925470E	Transitional	Central	0.1051	18.0863	19.8799	22.0684	0.000684311	0.000940217	0.00125247	14.6863	16.4799	18.6684	0.000555669	0.000779415	0.0010595	21.4863	23.2799	25.4684	0.000812954	0.00110102	0.00144543
RGU292734N0925450E	RGS292734N0925450E	Transitional	Central	0.072855	14.68	16.1358	17.9121	0.000385023	0.000529007	0.000704692	11.28	12.7358	14.5121	0.000295849	0.000417539	0.00057093	18.08	19.5358	21.3121	0.000474198	0.000640475	0.000838454
RGU292724N0925423E	RGS292724N0925423E	Transitional	Central	0.119967	21.0888	23.1801	25.7319	0.000910782	0.00125138	0.00166697	17.6888	19.7801	22.3319	0.000763943	0.00106783	0.00144671	24.4888	26.5801	29.1319	0.00105762	0.00143493	0.00188722
RGU292674N0925425E	RGS292674N0925425E	Transitional	Central	0.0233895	16.7578	18.4197	20.4474	0.000141104	0.000193872	0.000258257	13.3578	15.0197	17.0474	0.000112476	0.000158086	0.000215314	20.1578	21.8197	23.8474	0.000169733	0.000229658	0.0003012
RGU292573N0925381E	RGS292573N0925381E	Transitional	Central	0.043629	15.2369	16.748	18.5917	0.000239318	0.000328814	0.000438014	11.8369	13.348	15.1917	0.000185916	0.000262061	0.000357911	18.6369	20.148	21.9917	0.00029272	0.000395566	0.000518117
RGU292530N0925363E	RGS292530N0925363E	Transitional	Central	0.109295	18.3764	20.1988	22.4224	0.00072304	0.000993429	0.00132335	14.9764	16.7988	19.0224	0.000589264	0.000826209	0.00112269	21.7764	23.5988	25.8224	0.000856817	0.00116065	0.00152402
RGU292562N0925358E	RGS292562N0925358E	Active	Central	0.144324	15.859	17.4317	19.3507	0.000823984	0.00113212	0.0015081	12.459	14.0317	15.9507	0.000647331	0.000911305	0.00124312	19.259	20.8317	22.7507	0.00100064	0.00135294	0.00177308
RGU292579N0925334E	RGS292579N0925334E	Active	Central	0.259435	17.2143	18.9214	21.0044	0.00160775	0.00220899	0.0029426	13.8143	15.5214	17.6044	0.00129021	0.00181206	0.00246628	20.6143	22.3214	24.4044	0.0019253	0.00260593	0.00341893
RGU292614N0925310E	RGS292614N0925310E	Transitional	Central	0.0693134	17.4627	19.1944	21.3075	0.000435744	0.000598695	0.000797524	14.0627	15.7944	17.9075	0.000350904	0.000492645	0.000670264	20.8627	22.5944	24.7075	0.000520583	0.000704745	0.000924783
RGU292928N0925413E	RGS292928N0925413E	Transitional	Central	0.0587803	12.5737	13.8206	15.342	0.000266071	0.000365571	0.000486978	9.17367	10.4206	11.942	0.000194123	0.000275637	0.000379057	15.9737	17.2206	18.742	0.000338018	0.000455505	0.000594899
RGU292945N0925365E	RGS292945N0925365E	Transitional	Central	0.0331325	11.9901	13.1792	14.63	0.000143015	0.000196497	0.000261754	8.59012	9.77917	11.23	0.00010246	0.000145804	0.000200922	15.3901	16.5792	18.03	0.000183569	0.000247189	0.000322585
RGU292980N0925308E	RGS292980N0925308E	Transitional	Central	0.0269667	12.9164	14.1973	15.7602	0.000125392	0.000172284	0.0002295	9.51639	10.7973	12.3602	9.23851e-05	0.000131025	0.00017999	16.3164	17.5973	19.1602	0.0001584	0.000213543	0.000279011
RGU292950N0925310E	RGS292950N0925310E	Transitional	Central	0.0312004	20.6585	22.7072	25.2069	0.000232039	0.000318812	0.000424691	17.2585	19.3072	21.8069	0.000193849	0.000271076	0.000367407	24.0585	26.1072	28.6069	0.000270228	0.000366549	0.000481975
RGU292916N0925330E	RGS292916N0925330E	Active	Central	0.0956443	20.5049	22.5383	25.0195	0.000706023	0.000970049	0.00129221	17.1049	19.1383	21.6195	0.000588955	0.000823713	0.0011166	23.9049	25.9383	28.4195	0.000823092	0.00111638	0.00146781
RGU292897N0925269E	RGS292897N0925269E	Active	Central	0.064494	16.2626	17.8754	19.8432	0.000377584	0.000518785	0.000691075	12.8626	14.4754	16.4432	0.000298643	0.000420109	0.000572664	19.6626	21.2754	23.2432	0.000456524	0.000617461	0.000809487
RGU294522N0925406E	RGS294522N0925406E	Active	Central	0.0116935	14.6195	16.0693	17.8383	6.15428e-05	8.45574e-05	0.000112639	11.2195	12.6693	14.4383	4.723e-05	6.66664e-05	9.117e-05	18.0195	19.4693	21.2383	7.58556e-05	0.000102448	0.000134108
RGU294582N0925418E	RGS294582N0925418E	Active	Central	0.0125181	18.0564	19.847	22.0319	8.13716e-05	0.000111801	0.000148931	14.6564	16.447	18.6319	6.60494e-05	9.26486e-05	0.000125948	21.4564	23.247	25.4319	9.66938e-05	0.000130954	0.000171914
RGU294558N0925420E	RGS294558N0925420E	Transitional	Central	0.0161498	13.6043	14.9534	16.5996	7.90945e-05	0.000108673	0.000144763	10.2043	11.5534	13.1996	5.93271e-05	8.39635e-05	0.000115112	17.0043	18.3534	19.9996	9.88619e-05	0.000133382	0.000174414
RGU294594N0925437E	RGS294594N0925437E	Active	Central	0.0641599	12.2394	13.4532	14.9342	0.000282701	0.000388421	0.000517417	8.83944	10.0532	11.5342	0.00020417	0.000290256	0.000399619	15.6394	16.8532	18.3342	0.000361233	0.000486585	0.000635214
RGU294526N0925534E	RGS294526N0925534E	Active	Central	0.0609339	11.6281	12.7813	14.1883	0.000255077	0.000350466	0.000466856	8.22812	9.38127	10.7883	0.000180494	0.000257237	0.000354982	15.0281	16.1813	17.5883	0.00032966	0.000443694	0.000578731
RGU294225N0925595E	RGS294225N0925595E	Active	Central	0.156566	17.2015	18.9074	20.9888	0.000969544	0.00133212	0.00177452	13.8015	15.5074	17.5888	0.000777907	0.00109257	0.00148706	20.6015	22.3074	24.3888	0.00116118	0.00157166	0.00206197
RGU294209N0925613E	RGS294209N0925613E	Transitional	Central	0.0506366	18.6368	20.485	22.7402	0.000339734	0.000466782	0.000621802	15.2368	17.085	19.3402	0.000277755	0.000389308	0.000528833	22.0368	23.885	26.1402	0.000401714	0.000544256	0.000714771
RGU292233N0925635E	RGS292233N0925635E	Transitional	Central	0.0226246	9.57064	10.5197	11.6778	7.79513e-05	0.000107102	0.000142671	6.17064	7.11975	8.27783	5.02589e-05	7.24865e-05	0.000101132	12.9706	13.9197	15.0778	0.000105644	0.000141718	0.00018421
RGU292434N0925709E	RGS292434N0925709E	Active	Central	0.138841	14.4996	15.9376	17.6921	0.000724731	0.000995752	0.00132644	11.0996	12.5376	14.2921	0.00055479	0.000783325	0.00107153	17.8996	19.3376	21.0921	0.000894672	0.00120818	0.00158136
RGU292524N0925554E	RGS292524N0925554E	Transitional	Central	0.0695121	15.0762	16.5713	18.3955	0.000377271	0.000518356	0.000690504	11.6762	13.1713	14.9955	0.000292189	0.000412003	0.00056288	18.4762	19.9713	21.7955	0.000462354	0.00062471	0.000818128
RGU292485N0925505E	RGS292485N0925505E	Active	Central	0.153775	18.1879	19.9916	22.1924	0.00100687	0.0013834	0.00184283	14.7879	16.5916	18.7924	0.000818647	0.00114812	0.0015605	21.5879	23.3916	25.5924	0.00119509	0.00161867	0.00212516
RGU292443N0925514E	RGS292443N0925514E	Transitional	Central	0.0904284	14.3467	15.7694	17.5054	0.000467045	0.000641701	0.000854812	10.9467	12.3694	14.1054	0.00035636	0.000503346	0.000688786	17.7467	19.1694	20.9054	0.000577729	0.000780057	0.00102084
RGU292436N0925467E	RGS292436N0925467E	Active	Central	0.129608	12.5161	13.7573	15.2718	0.000583987	0.000802375	0.00106885	9.11611	10.3573	11.8718	0.000425347	0.000604075	0.000830887	15.9161	17.1573	18.6718	0.000742627	0.00100068	0.00130681
RGU292333N0925475E	RGS292333N0925475E	Transitional	Central	0.0359834	11.0488	12.1445	13.4814	0.000143126	0.000196649	0.000261957	7.64876	8.74445	10.0814	9.90821e-05	0.000141595	0.000195892	14.4488	15.5445	16.8814	0.000187169	0.000251704	0.000328023
RGU292249N0925505E	RGS292249N0925505E	Active	Central	0.0212566	9.73089	10.6959	11.8734	7.44645e-05	0.000102311	0.000136289	6.33089	7.29589	8.47336	4.84464e-05	6.97887e-05	9.72622e-05	13.1309	14.0959	15.2734	0.000100483	0.000134834	0.000175317
RGU292203N0925506E	RGS292194N0925469E	Transitional	Central	0.0619948	19.0096	20.8947	23.1949	0.000424258	0.000582914	0.000776501	15.6096	17.4947	19.7949	0.000348376	0.000488062	0.000662679	22.4096	24.2947	26.5949	0.000500139	0.000677766	0.000890324
RGU292167N0925443E	RGS292167N0925443E	Active	Central	0.0750443	11.4746	12.6125	14.001	0.000309998	0.000425925	0.000567376	8.07462	9.21254	10.601	0.000218143	0.000311107	0.000429594	14.8746	16.0125	17.401	0.000401852	0.000540742	0.000705157
RGU292194N0925468E	RGS292194N0925468E	Active	Central	0.0462149	14.6416	16.0936	17.8653	0.000243598	0.000334695	0.000445848	11.2416	12.6936	14.4653	0.000187031	0.000263986	0.000360997	18.0416	19.4936	21.2653	0.000300165	0.000405403	0.000530698
RGU292190N0925398E	RGS292190N0925398E	Transitional	Central	0.280718	19.4043	21.3286	23.6765	0.00196097	0.00269429	0.00358907	16.0043	17.9286	20.2765	0.00161737	0.00226479	0.00307368	22.8043	24.7286	27.0765	0.00230457	0.00312379	0.00410447
RGU292261N0925438E	RGS292261N0925438E	Active	Central	0.0719178	14.8848	16.361	18.1621	0.000385374	0.000529489	0.000705335	11.4848	12.961	14.7621	0.000297347	0.000419455	0.000573294	18.2848	19.761	21.5621	0.000473402	0.000639524	0.000837376
RGU292371N0925366E	RGS292371N0925366E	Transitional	Central	0.082477	16.3401	17.9605	19.9377	0.000485166	0.000666599	0.000887978	12.9401	14.5605	16.5377	0.000384214	0.000540409	0.000736551	19.7401	21.3605	23.3377	0.000586117	0.000792789	0.00103941
RGU292301N0925378E	RGS292301N0925378E	Active	Central	0.077303	14.2383	15.6503	17.3732	0.000396239	0.000544417	0.000725219	10.8383	12.2503	13.9732	0.00030162	0.000426143	0.000583291	17.6383	19.0503	20.7732	0.000490858	0.00066269	0.000867147
RGU292299N0925321E	RGS292299N0925321E	Active	Central	0.0440834	13.8483	15.2217	16.8974	0.000219774	0.000301961	0.000402243	10.4483	11.8217	13.4974	0.000165816	0.000234513	0.000321306	17.2483	18.6217	20.2974	0.000273732	0.000369408	0.00048318
RGU294397N0925792E	RGS294405N0925713E	Transitional	Central	0.0328785	14.6087	16.0575	17.8252	0.000172913	0.000237575	0.000316475	11.2087	12.6575	14.4252	0.000132669	0.000187271	0.00025611	18.0087	19.4575	21.2252	0.000213156	0.00028788	0.00037684
RGU294381N0925816E	RGS294405N0925713E	Transitional	Central	0.0518551	18.4866	20.3199	22.5569	0.000345105	0.000474161	0.000631632	15.0866	16.9199	19.1569	0.000281635	0.000394823	0.000536426	21.8866	23.7199	25.9569	0.000408576	0.0005535	0.000726838
RGU294331N0925745E	RGS294331N0925745E	Active	Central	0.158641	15.4411	16.9723	18.8407	0.00088185	0.00121163	0.00161401	12.0411	13.5723	15.4407	0.000687673	0.000968907	0.00132275	18.8411	20.3723	22.2407	0.00107603	0.00145435	0.00190528
RGU294305N0925805E	RGS294305N0925805E	Active	Central	0.206626	16.2077	17.815	19.7762	0.00120561	0.00165647	0.00220659	12.8077	14.415	16.3762	0.000952704	0.00134033	0.00182722	19.6077	21.215	23.1762	0.00145852	0.0019726	0.00258595
RGU292870N0925301E	RGS292870N0925301E	Active	Central	0.0216791	16.9777	18.6614	20.7158	0.000132503	0.000182053	0.000242514	13.5777	15.2614	17.3158	0.000105967	0.000148884	0.000202711	20.3777	22.0614	24.1158	0.000159038	0.000215222	0.000282317
RGU294117N0925898E	RGS294117N0925898E	Active	Central	0.0597864	21.0341	23.1201	25.6653	0.00045272	0.00062202	0.000828595	17.6341	19.7201	22.2653	0.000379541	0.000530547	0.000718827	24.4341	26.5201	29.0653	0.000525899	0.000713493	0.000938362
RGU294185N0925826E	RGS294185N0925826E	Active	Central	0.0264633	16.581	18.2253	20.2316	0.000157963	0.000217035	0.000289113	13.181	14.8253	16.8316	0.000125572	0.000176546	0.000240527	19.981	21.6253	23.6316	0.000190354	0.000257524	0.0003377
RGU294204N0925834E	RGS294204N0925834E	Active	Central	0.195168	12.318	13.5396	15.0301	0.000865469	0.00118912	0.00158403	8.91803	10.1396	11.6301	0.000626584	0.000890514	0.0012257	15.718	16.9396	18.4301	0.00110435	0.00148773	0.00194236
RGU294232N0925850E	RGS294232N0925850E	Active	Central	0.0563273	16.1971	17.8033	19.7632	0.000328442	0.000451266	0.000601133	12.7971	14.4033	16.3632	0.000259497	0.000365085	0.000497716	19.5971	21.2033	23.1632	0.000397386	0.000537447	0.00070455
RGU293727N0925748E	RGS293727N0925748E	Active	Central	0.0862618	13.3714	14.6975	16.3154	0.000415239	0.000570523	0.000759995	9.97142	11.2975	12.9154	0.000309655	0.000438542	0.000601619	16.7714	18.0975	19.7154	0.000520824	0.000702503	0.000918372
RGU293832N0925814E	RGS293832N0925814E	Active	Central	0.188974	12.0756	13.2731	14.7343	0.000821507	0.00112872	0.00150357	8.67555	9.87307	11.3343	0.000590203	0.000839589	0.00115661	15.4756	16.6731	18.1343	0.00105281	0.00141785	0.00185053
RGU293793N0925798E	RGS293793N0925798E	Active	Central	0.0200445	16.2155	17.8236	19.7857	0.000117012	0.000160769	0.000214161	12.8155	14.4236	16.3857	9.24771e-05	0.000130101	0.00017736	19.6155	21.2236	23.1857	0.000141546	0.000191438	0.000250963
RGU293901N0925788E	RGS293901N0925788E	Active	Central	0.0610459	12.8394	14.1126	15.6662	0.000282165	0.000387683	0.000516434	9.43936	10.7126	12.2662	0.000207444	0.000294283	0.000404354	16.2394	17.5126	19.0662	0.000356885	0.000481083	0.000628514
RGU293599N0925732E	RGS293599N0925732E	Active	Central	0.0300192	14.5651	16.0095	17.7719	0.000157403	0.000216266	0.000288088	11.1651	12.6095	14.3719	0.00012066	0.000170336	0.000232973	17.9651	19.4095	21.1719	0.000194147	0.000262195	0.000343204
RGU293574N0925836E	RGS293574N0925836E	Active	Central	0.155889	14.083	15.4797	17.1837	0.00079034	0.0010859	0.00144653	10.683	12.0797	13.7837	0.000599532	0.000847387	0.00116032	17.483	18.8797	20.5837	0.000981148	0.00132441	0.00173274
RGU293253N0925804E	RGS293253N0925804E	Active	Central	0.0858042	16.7802	18.4442	20.4747	0.000518331	0.000712166	0.000948679	13.3802	15.0442	17.0747	0.000413306	0.000580886	0.000791142	20.1802	21.8442	23.8747	0.000623355	0.000843447	0.00110622
RGU293339N0925872E	RGS293339N0925872E	Active	Central	0.0236484	11.2929	12.4128	13.7792	9.6141e-05	0.000132094	0.000175963	7.89286	9.01276	10.3792	6.71953e-05	9.59119e-05	0.000132544	14.6929	15.8128	17.1792	0.000125087	0.000168276	0.000219381
RGU293262N0925536E	RGS293262N0925536E	Active	Central	0.0643011	15.205	16.7129	18.5527	0.000351972	0.000483595	0.000644199	11.805	13.3129	15.1527	0.000273267	0.000385215	0.000526142	18.605	20.1129	21.9527	0.000430676	0.000581976	0.000762256
RGU292885N0925774E	RGS292885N0925774E	Active	Central	0.153359	15.5127	17.051	18.9281	0.00085644	0.00117672	0.00156751	12.1127	13.651	15.5281	0.000668729	0.000942077	0.00128594	18.9127	20.451	22.3281	0.00104415	0.00141135	0.00184907
RGU292982N0925837E	RGS292982N0925837E	Active	Central	0.0373849	17.5918	19.3363	21.465	0.00023676	0.000325298	0.000433331	14.1918	15.9363	18.065	0.000191	0.0002681	0.000364692	20.9918	22.7363	24.865	0.000282519	0.000382497	0.00050197
RGU292840N0922713E	RGS292840N0922713E	Active	Western	0.138598	12.6727	13.9295	15.4629	0.000632309	0.000868769	0.00115729	9.27275	10.5295	12.0629	0.000462666	0.000656714	0.000902824	16.0727	17.3295	18.8629	0.000801953	0.00108082	0.00141176
RGU293055N0922713E	RGS293055N0922713E	Active	Western	0.581318	16.3013	17.9179	19.8904	0.00341146	0.00468721	0.00624385	12.9013	14.5179	16.4904	0.00269992	0.00379779	0.00517655	19.7013	21.3179	23.2904	0.00412299	0.00557663	0.00731115
RGU292792N0922764E	RGS292792N0922764E	Active	Western	0.0295464	13.9468	15.3299	17.0175	0.000148348	0.000203824	0.000271515	10.5468	11.9299	13.6175	0.000112183	0.000158618	0.000217267	17.3468	18.7299	20.4175	0.000184513	0.00024903	0.000325762
RGU292908N0922816E	RGS292908N0922816E	Active	Western	0.0299876	13.5872	14.9347	16.5788	0.000146682	0.000201535	0.000268465	10.1872	11.5347	13.1788	0.000109977	0.000155654	0.000213408	16.9872	18.3347	19.9788	0.000183386	0.000247416	0.000323523
RGU293012N0922819E	RGS293012N0922819E	Active	Western	0.0182985	14.219	15.6291	17.3496	9.36667e-05	0.000128694	0.000171434	10.819	12.2291	13.9496	7.12694e-05	0.000100698	0.000137838	17.619	19.0291	20.7496	0.000116064	0.000156691	0.00020503
RGU293076N0922806E	RGS293076N0922806E	Active	Western	0.0201384	13.8088	15.1782	16.8491	0.000100112	0.000137549	0.00018323	10.4088	11.7782	13.4491	7.54622e-05	0.000106738	0.000146256	17.2088	18.5782	20.2491	0.000124761	0.000168361	0.000220204
RGU293071N0922837E	RGS293071N0922837E	Active	Western	0.0189378	18.3894	20.213	22.4382	0.000125371	0.000172256	0.000229462	14.9894	16.813	19.0382	0.000102192	0.000143281	0.000194692	21.7894	23.613	25.8382	0.000148551	0.00020123	0.000264232
RGU293080N0922857E	RGS293080N0922857E	Active	Western	0.113625	13.7927	15.1605	16.8295	0.000564193	0.000775179	0.00103262	10.3927	11.7605	13.4295	0.000425115	0.000601332	0.000824002	17.1927	18.5605	20.2295	0.00070327	0.000949026	0.00124123
RGU293014N0922860E	RGS293014N0922860E	Active	Western	0.120385	13.335	14.6574	16.271	0.000577921	0.00079404	0.00105774	9.93499	11.2574	12.871	0.000430569	0.000609851	0.000836717	16.735	18.0574	19.671	0.000725272	0.00097823	0.00127877
RGU292963N0922903E	RGS292963N0922903E	Active	Western	0.17695	14.3193	15.7394	17.4721	0.000912169	0.00125328	0.0016695	10.9193	12.3394	14.0721	0.000695582	0.000982551	0.00134462	17.7193	19.1394	20.8721	0.00112876	0.00152402	0.00199438
RGU292886N0922902E	RGS292886N0922902E	Active	Western	0.0382191	16.9314	18.6105	20.6592	0.000232958	0.000320075	0.000426372	13.5314	15.2105	17.2592	0.000186177	0.000261599	0.000356202	20.3314	22.0105	24.0592	0.000279738	0.00037855	0.000496543
RGU292698N0922924E	RGS292698N0922924E	Transitional	Western	0.101185	18.2689	20.0807	22.2913	0.000665474	0.000914335	0.00121799	14.8689	16.6807	18.8913	0.000541624	0.000759523	0.00103221	21.6689	23.4807	25.6913	0.000789324	0.00106915	0.00140376
RGU292932N0922937E	RGS292932N0922937E	Active	Western	0.261048	14.599	16.0468	17.8134	0.00137198	0.00188505	0.00251108	11.199	12.6468	14.4134	0.00105246	0.00148564	0.00203179	17.999	19.4468	21.2134	0.0016915	0.00228445	0.00299036
RGU292653N0922972E	RGS292653N0922972E	Transitional	Western	0.120005	15.9312	17.511	19.4388	0.000688257	0.000945638	0.00125969	12.5312	14.111	16.0388	0.00054137	0.00076203	0.00103936	19.3312	20.911	22.8388	0.000835143	0.00112925	0.00148002
RGU292526N0922997E	RGS292526N0922997E	Active	Western	0.58375	14.8928	16.3697	18.1717	0.00312971	0.00430011	0.00572818	11.4928	12.9697	14.7717	0.0024152	0.00340697	0.00465642	18.2928	19.7697	21.5717	0.00384422	0.00519324	0.00679995
RGU292554N0923006E	RGS292554N0923006E	Active	Western	0.0111495	9.69566	10.6572	11.8304	3.89168e-05	5.34701e-05	7.12277e-05	6.29566	7.25717	8.43038	2.52697e-05	3.64113e-05	5.07572e-05	13.0957	14.0572	15.2304	5.25638e-05	7.05289e-05	9.16983e-05
RGU293219N0923148E	RGS293219N0923148E	Active	Western	0.394788	13.9624	15.347	17.0365	0.00198438	0.00272646	0.00363193	10.5624	11.947	13.6365	0.00150116	0.00212244	0.0029071	17.3624	18.747	20.4365	0.0024676	0.00333049	0.00435676
RGU293151N0923027E	RGS293151N0923027E	Active	Western	0.0690807	20.6312	22.6772	25.1737	0.000513079	0.000704951	0.000939067	17.2312	19.2772	21.7737	0.000428524	0.000599257	0.000812235	24.0312	26.0772	28.5737	0.000597634	0.000810644	0.0010659
RGU293093N0923057E	RGS293093N0923057E	Active	Western	0.178298	12.3184	13.54	15.0306	0.000790683	0.00108637	0.00144715	8.91841	10.14	11.6306	0.000572447	0.000813573	0.0011198	15.7184	16.94	18.4306	0.00100892	0.00135916	0.00177451
RGU292997N0923061E	RGS292997N0923061E	Active	Western	0.134554	17.0542	18.7455	20.8091	0.000826099	0.00113503	0.00151197	13.6542	15.3455	17.4091	0.000661404	0.00092916	0.00126493	20.4542	22.1455	24.2091	0.000990794	0.0013409	0.00175902
RGU293035N0923008E	RGS293035N0923008E	Active	Western	0.146374	17.0086	18.6953	20.7534	0.000896262	0.00123143	0.00164039	13.6086	15.2953	17.3534	0.000717101	0.00100748	0.00137165	20.4086	22.0953	24.1534	0.00107542	0.00145538	0.00190913
RGU292643N0923133E	RGS292643N0923133E	Active	Western	0.0895371	17.619	19.3663	21.4982	0.00056792	0.0007803	0.00103944	14.219	15.9663	18.0982	0.000458326	0.000643308	0.00087505	21.019	22.7663	24.8982	0.000677513	0.000917291	0.00120383
RGU292593N0923117E	RGS292593N0923117E	Active	Western	0.0302897	15.3717	16.8961	18.7561	0.000167617	0.000230299	0.000306782	11.9717	13.4961	15.3561	0.000130542	0.000183956	0.00025117	18.7717	20.2961	22.1561	0.000204691	0.000276642	0.000362394
RGU292694N0923078E	RGS292694N0923078E	Active	Western	0.0446742	12.2446	13.4589	14.9405	0.000196927	0.00027057	0.000360427	8.84462	10.0589	11.5405	0.000142246	0.000202218	0.000278405	15.6446	16.8589	18.3405	0.000251608	0.000338921	0.000442449
RGU292701N0923113E	RGS292701N0923113E	Active	Western	0.0391293	14.0129	15.4025	17.0981	0.000197393	0.00027121	0.00036128	10.6129	12.0025	13.6981	0.000149499	0.000211342	0.000289439	17.4129	18.8025	20.4981	0.000245287	0.000331078	0.000433121
RGU292682N0923130E	RGS292682N0923130E	Active	Western	0.0457759	22.569	24.8071	27.538	0.000371921	0.000511005	0.000680712	19.169	21.4071	24.138	0.000315892	0.000440968	0.000596668	25.969	28.2071	30.938	0.000427951	0.000581043	0.000764757
RGU293033N0923045E	RGS293033N0923045E	Active	Western	0.0352461	16.7415	18.4017	20.4275	0.000212426	0.000291865	0.000388794	13.3415	15.0017	17.0275	0.000169285	0.000237938	0.000324082	20.1415	21.8017	23.8275	0.000255567	0.000345791	0.000453506
RGU293191N0923202E	RGS293191N0923202E	Active	Western	0.102231	17.0122	18.6992	20.7578	0.000626102	0.00086024	0.00114593	13.6122	15.2992	17.3578	0.000500971	0.000703826	0.000958232	20.4122	22.0992	24.1578	0.000751233	0.00101665	0.00133362
RGU293227N0923292E	RGS293227N0923292E	Active	Western	0.0985119	17.627	19.3751	21.508	0.00062513	0.000858904	0.00114415	14.227	15.9751	18.108	0.000504551	0.000708181	0.000963281	21.027	22.7751	24.908	0.000745708	0.00100963	0.00132502
RGU293219N0923226E	RGS293219N0923226E	Active	Western	0.381333	16.4974	18.1335	20.1297	0.00226477	0.00311171	0.00414511	13.0974	14.7335	16.7297	0.00179802	0.00252827	0.00344499	19.8974	21.5335	23.5297	0.00273152	0.00369515	0.00484524
RGU293245N0923235E	RGS293245N0923235E	Active	Western	0.192515	13.3612	14.6862	16.303	0.000926007	0.0012723	0.00169483	9.96122	11.2862	12.903	0.000690368	0.000977749	0.00134137	16.7612	18.0862	19.703	0.00116165	0.00156685	0.00204829
RGU292796N0923232E	RGS292796N0923232E	Active	Western	0.331561	15.5367	17.0775	18.9575	0.00185449	0.002548	0.00339419	12.1367	13.6775	15.5575	0.00144866	0.00204071	0.00278545	18.9367	20.4775	22.3575	0.00226032	0.00305528	0.00400294
RGU292750N0923251E	RGS292750N0923251E	Active	Western	0.142213	11.8255	12.9982	14.4291	0.000605424	0.000831828	0.00110808	8.42546	9.59818	11.0291	0.000431355	0.000614243	0.000846979	15.2255	16.3982	17.8291	0.000779492	0.00104941	0.00136918
RGU292672N0923269E	RGS292672N0923269E	Transitional	Western	0.14389	13.3953	14.7237	16.3446	0.00069388	0.000953364	0.00126998	9.99529	11.3237	12.9446	0.000517759	0.000733213	0.0010058	16.7953	18.1237	19.7446	0.000870001	0.00117352	0.00153416
RGU292649N0923181E	RGS292649N0923181E	Active	Western	0.291817	18.1236	19.9209	22.114	0.00190397	0.00261598	0.00348475	14.7236	16.5209	18.714	0.00154678	0.0021695	0.00294897	21.5236	23.3209	25.514	0.00226115	0.00306246	0.00402053
RGU292574N0923192E	RGS292574N0923192E	Active	Western	0.116788	15.0657	16.5598	18.3828	0.000633418	0.000870292	0.00115932	11.6657	13.1598	14.9828	0.00049047	0.000691606	0.000944896	18.4657	19.9598	21.7828	0.000776367	0.00104898	0.00137374
RGU292961N0923327E	RGS292961N0923327E	Active	Western	0.120783	26.6926	29.3396	32.5695	0.00116064	0.00159468	0.00212428	23.2926	25.9396	29.1695	0.0010128	0.00140988	0.00190252	30.0926	32.7396	35.9695	0.00130848	0.00177948	0.00234603
RGU293132N0923356E	RGS293132N0923356E	Active	Western	0.0315687	10.6604	11.7176	13.0076	0.000121153	0.00016646	0.000221741	7.26042	8.31761	9.60755	8.25129e-05	0.000118159	0.000163781	14.0604	15.1176	16.4076	0.000159793	0.00021476	0.000279702
RGU293125N0923322E	RGS293125N0923322E	Active	Western	0.036658	19.1538	21.0532	23.3709	0.00025277	0.000347296	0.000462634	15.7538	17.6532	19.9709	0.0002079	0.000291209	0.00039533	22.5538	24.4532	26.7709	0.000297639	0.000403383	0.000529938
RGU293114N0923368E	RGS293114N0923368E	Transitional	Western	0.31596	16.8533	18.5246	20.5639	0.00191698	0.00263386	0.00350858	13.4533	15.1246	17.1639	0.00153025	0.00215044	0.00292847	20.2533	21.9246	23.9639	0.00230372	0.00311728	0.00408868
RGU293192N0923354E	RGS293192N0923354E	Active	Western	0.130776	18.8744	20.7462	23.0301	0.000888597	0.0012209	0.00162636	15.4744	17.3462	19.6301	0.000728527	0.00102081	0.00138626	22.2744	24.1462	26.4301	0.00104867	0.00142099	0.00186647
RGU293162N0923456E	RGS293162N0923456E	Transitional	Western	0.175259	9.99369	10.9847	12.194	0.000630533	0.000866328	0.00115404	6.59369	7.58475	8.79402	0.000416016	0.000598182	0.000832263	13.3937	14.3847	15.594	0.00084505	0.00113447	0.00147581
RGU293249N0923459E	RGS293249N0923459E	Transitional	Western	0.472647	20.3129	22.3273	24.7852	0.0034563	0.00474882	0.00632591	16.9129	18.9273	21.3852	0.00287778	0.00402567	0.00545813	23.7129	25.7273	28.1852	0.00403482	0.00547197	0.00719369
RGU293316N0923309E	RGS293316N0923309E	Active	Western	0.168249	16.9619	18.6439	20.6964	0.00102737	0.00141157	0.00188035	13.5619	15.2439	17.2964	0.000821435	0.00115415	0.00157145	20.3619	22.0439	24.0964	0.00123331	0.00166899	0.00218926
RGU293410N0923364E	RGS293410N0923364E	Transitional	Western	0.220328	23.8376	26.2015	29.086	0.00189075	0.00259781	0.00346056	20.4376	22.8015	25.686	0.00162107	0.00226071	0.00305603	27.2376	29.6015	32.486	0.00216043	0.00293491	0.00386508
RGU293329N0923383E	RGS293329N0923383E	Transitional	Western	0.0188742	16.1472	17.7485	19.7024	0.000109716	0.000150745	0.000200808	12.7472	14.3485	16.3024	8.66137e-05	0.000121868	0.000166155	19.5472	21.1485	23.1024	0.000132818	0.000179623	0.000235461
RGU293370N0923444E	RGS293370N0923444E	Active	Western	0.131603	27.036	29.7171	32.9885	0.00128088	0.00175988	0.00234435	23.636	26.3171	29.5885	0.0011198	0.00155853	0.00210272	30.436	33.1171	36.3885	0.00144196	0.00196124	0.00258597
RGU293446N0923434E	RGS293446N0923434E	Active	Western	0.0702029	13.0662	14.362	15.943	0.000330223	0.000453714	0.000604394	9.66622	10.962	12.543	0.000244295	0.000346303	0.000475501	16.4662	17.762	19.343	0.000416152	0.000561124	0.000733286
RGU293381N0923500E	RGS293381N0923500E	Active	Western	0.455508	20.3264	22.3422	24.8017	0.00333319	0.00457967	0.0061006	16.9264	18.9422	21.4017	0.00277565	0.00388274	0.00526428	23.7264	25.7422	28.2017	0.00389073	0.0052766	0.00693691
RGU293432N0923497E	RGS293432N0923497E	Active	Western	0.176095	16.9011	18.5771	20.6222	0.00107143	0.0014721	0.00196099	13.5011	15.1771	17.2222	0.00085589	0.00120268	0.00163768	20.3011	21.9771	24.0222	0.00128697	0.00174153	0.0022843
RGU293447N0923543E	RGS293447N0923543E	Active	Western	0.0287464	9.34303	10.2696	11.4001	9.66882e-05	0.000132846	0.000176964	5.94303	6.86957	8.00011	6.15026e-05	8.88638e-05	0.000124186	12.743	13.6696	14.8001	0.000131874	0.000176828	0.000229743
RGU293494N0923617E	RGS293494N0923617E	Active	Western	0.0124291	8.20698	9.02086	10.0139	3.67221e-05	5.04547e-05	6.72109e-05	4.80698	5.62086	6.61393	2.15088e-05	3.14381e-05	4.4391e-05	11.607	12.4209	13.4139	5.19353e-05	6.94713e-05	9.00308e-05
RGU293570N0923670E	RGS293570N0923670E	Active	Western	0.0219737	15.8999	17.4767	19.4006	0.000125776	0.000172812	0.000230203	12.4999	14.0767	16.0006	9.88805e-05	0.000139192	0.000189859	19.2999	20.8767	22.8006	0.000152672	0.000206431	0.000270547
RGU293542N0923712E	RGS293542N0923712E	Active	Western	0.044848	12.5251	13.7672	15.2828	0.000202221	0.000277844	0.000370117	9.1251	10.3672	11.8828	0.000147327	0.000209227	0.000287776	15.9251	17.1672	18.6828	0.000257115	0.000346462	0.000452458
RGU293087N0923241E	RGS293087N0923241E	Active	Western	0.0161607	14.4999	15.9379	17.6924	8.43585e-05	0.000115905	0.000154398	11.0999	12.5379	14.2924	6.45778e-05	9.11794e-05	0.000124727	17.8999	19.3379	21.0924	0.000104139	0.000140631	0.000184069
RGU293054N0923273E	RGS293054N0923273E	Active	Western	0.118498	12.9787	14.2658	15.8362	0.00055366	0.000760708	0.00101334	9.57868	10.8658	12.4362	0.000408619	0.000579406	0.000795779	16.3787	17.6658	19.2362	0.000698702	0.000942009	0.0012309
RGU292915N0923263E	RGS292915N0923263E	Active	Western	0.0396495	19.5584	21.498	23.8646	0.000279173	0.000383573	0.000510959	16.1584	18.098	20.4646	0.000230642	0.000322909	0.000438162	22.9584	24.898	27.2646	0.000327704	0.000444237	0.000583756
RGU292867N0923234E	RGS292867N0923234E	Active	Western	0.0565119	12.4242	13.6563	15.1596	0.000252761	0.000347284	0.000462618	9.02417	10.2563	11.7596	0.00018359	0.00026082	0.000358862	15.8242	17.0563	18.5596	0.000321931	0.000433747	0.000566373
RGU292992N0923415E	RGS292992N0923415E	Active	Western	0.0457701	14.5807	16.0267	17.791	0.00024025	0.000330094	0.000439719	11.1807	12.6267	14.391	0.000184227	0.000260066	0.000355686	17.9807	19.4267	21.191	0.000296273	0.000400122	0.000523753
RGU292974N0923567E	RGS292974N0923567E	Active	Western	0.139727	13.8241	15.195	16.8678	0.000695376	0.000955419	0.00127272	10.4241	11.795	13.4678	0.00052435	0.000741637	0.00101618	17.2241	18.595	20.2678	0.000866401	0.0011692	0.00152926
RGU292816N0923657E	RGS292816N0923657E	Active	Western	0.0474086	12.4423	13.6762	15.1817	0.000212353	0.000291765	0.000388662	9.04227	10.2762	11.7817	0.000154325	0.00021923	0.000301619	15.8423	17.0762	18.5817	0.000270382	0.000364301	0.000475704
RGU292792N0923547E	RGS292792N0923547E	Active	Western	0.0304615	13.103	14.4024	15.9879	0.00014369	0.000197424	0.000262989	9.70302	11.0024	12.5879	0.000106405	0.000150818	0.000207062	16.503	17.8024	19.3879	0.000180975	0.00024403	0.000318917
RGU292865N0923644E	RGS292865N0923644E	Active	Western	0.348621	20.8575	22.9259	25.4498	0.00261769	0.00359661	0.00479105	17.4575	19.5259	22.0498	0.00219098	0.00306322	0.00415099	24.2575	26.3259	28.8498	0.0030444	0.00413	0.00543112
RGU292865N0923675E	RGS292865N0923675E	Active	Western	0.292857	14.7152	16.1745	17.9551	0.0015514	0.00213156	0.00283946	11.3152	12.7745	14.5551	0.00119294	0.00168349	0.00230178	18.1152	19.5745	21.3551	0.00190986	0.00257964	0.00337715
RGU292934N0923644E	RGS292934N0923644E	Active	Western	0.275425	13.4741	14.8104	16.4408	0.001336	0.00183561	0.00244523	10.0741	11.4104	13.0408	0.000998881	0.00141421	0.00193955	16.8741	18.2104	19.8408	0.00167312	0.00225701	0.00295091
RGU292742N0923622E	RGS292742N0923622E	Active	Western	0.061125	16.206	17.8132	19.7742	0.000356614	0.000489974	0.000652696	12.806	14.4132	16.3742	0.000281797	0.000396453	0.00054047	19.606	21.2132	23.1742	0.000431431	0.000583495	0.000764921
RGU292609N0923641E	RGS292609N0923641E	Active	Western	0.0330639	14.3999	15.828	17.5704	0.000171402	0.0002355	0.00031371	10.9999	12.428	14.1704	0.000130932	0.000184912	0.000253005	17.7999	19.228	20.9704	0.000211872	0.000286088	0.000374415
RGU292999N0923801E	RGS292999N0923801E	Transitional	Western	0.0925827	13.7962	15.1643	16.8337	0.000459822	0.000631778	0.000841594	10.3962	11.7643	13.4337	0.000346501	0.000490127	0.000671612	17.1962	18.5643	20.2337	0.000573144	0.00077343	0.00101158
RGU292955N0923737E	RGS292955N0923737E	Active	Western	0.0226453	13.3265	14.6481	16.2606	0.000108642	0.00014927	0.000198843	9.92651	11.2481	12.8606	8.09241e-05	0.000114623	0.000157266	16.7265	18.0481	19.6606	0.00013636	0.000183917	0.00024042
RGU293025N0923732E	RGS293025N0923732E	Active	Western	0.140722	14.2802	15.6964	17.4243	0.000723434	0.000993971	0.00132407	10.8802	12.2964	14.0243	0.000551191	0.000778666	0.00106571	17.6802	19.0964	20.8243	0.000895678	0.00120928	0.00158244
RGU293095N0923894E	RGS293095N0923894E	Active	Western	0.0724893	24.6286	27.071	30.0511	0.000642711	0.000883059	0.00117633	21.2286	23.671	26.6511	0.000553984	0.000772151	0.00104324	28.0286	30.471	33.4511	0.000731437	0.000993968	0.00130942
RGU292990N0923696E	RGS292990N0923696E	Active	Western	0.0913007	14.5097	15.9486	17.7043	0.000476907	0.000655252	0.000872863	11.1097	12.5486	14.3043	0.000365155	0.000515562	0.000705235	17.9097	19.3486	21.1043	0.000588659	0.000794942	0.00104049
RGU293025N0923650E	RGS293025N0923650E	Active	Western	0.0572433	17.8378	19.6067	21.7651	0.000367593	0.000505059	0.00067279	14.4378	16.2067	18.3651	0.000297527	0.000417476	0.000567692	21.2378	23.0067	25.1651	0.000437659	0.000592641	0.000777889
RGU293131N0923707E	RGS293131N0923707E	Active	Western	0.0749361	14.4144	15.8438	17.588	0.000388857	0.000534274	0.000711708	11.0144	12.4438	14.188	0.000297135	0.000419622	0.000574126	17.8144	19.2438	20.988	0.000480579	0.000648926	0.000849291
RGU293154N0923750E	RGS293154N0923750E	Active	Western	0.0288841	14.6159	16.0653	17.8339	0.000151979	0.000208814	0.000278162	11.2159	12.6653	14.4339	0.000116625	0.000164621	0.000225131	18.0159	19.4653	21.2339	0.000187334	0.000253007	0.000331193
RGU293123N0923787E	RGS293123N0923787E	Active	Western	0.177431	18.9512	20.8305	23.1237	0.00121051	0.00166319	0.00221554	15.5512	17.4305	19.7237	0.000993333	0.00139172	0.00188978	22.3512	24.2305	26.5237	0.00142768	0.00193466	0.00254131
RGU293179N0923811E	RGS293179N0923811E	Active	Western	0.0936597	16.8228	18.491	20.5267	0.000567221	0.000779339	0.00103816	13.4228	15.091	17.1267	0.000452581	0.00063604	0.000866201	20.2228	21.891	23.9267	0.00068186	0.000922639	0.00121012
RGU293167N0923937E	RGS293167N0923937E	Active	Western	0.113467	14.688	16.1446	17.9219	0.00059998	0.000824349	0.00109812	11.288	12.7446	14.5219	0.000461096	0.000650744	0.000889792	18.088	19.5446	21.3219	0.000738864	0.000997954	0.00130644
RGU293163N0923903E	RGS293163N0923903E	Active	Western	0.0326076	18.9362	20.8141	23.1054	0.000222287	0.000305413	0.000406842	15.5362	17.4141	19.7054	0.000182375	0.000255523	0.000346974	22.3362	24.2141	26.5054	0.000262198	0.000355303	0.000466709
RGU293184N0923870E	RGS293184N0923870E	Active	Western	0.0570365	11.7311	12.8945	14.314	0.000240876	0.000330955	0.000440866	8.3311	9.49446	10.914	0.000171064	0.000243689	0.000336147	15.1311	16.2945	17.714	0.000310689	0.00041822	0.000545585
RGU293201N0923828E	RGS293201N0923828E	Active	Western	0.1311	9.87297	10.8521	12.0467	0.000465966	0.00064022	0.000852839	6.47297	7.45206	8.64672	0.000305499	0.000439636	0.000612138	13.273	14.2521	15.4467	0.000626433	0.000840803	0.00109354
RGU293031N0924028E	RGS293031N0924028E	Active	Western	0.060759	15.658	17.2108	19.1055	0.000342491	0.00047057	0.000626847	12.258	13.8108	15.7055	0.000268122	0.000377608	0.000515294	19.058	20.6108	22.5055	0.00041686	0.000563531	0.000738401
RGU292923N0923963E	RGS292923N0923963E	Active	Western	0.14125	16.4695	18.1028	20.0956	0.000837472	0.00115065	0.00153279	13.0695	14.7028	16.6956	0.000664583	0.000934542	0.00127346	19.8695	21.5028	23.4956	0.00101036	0.00136677	0.00179212
RGU293322N0923880E	RGS293322N0923880E	Active	Western	0.0291514	14.7676	16.2321	18.019	0.000154979	0.000212935	0.000283651	11.3676	12.8321	14.619	0.000119297	0.000168333	0.000230129	18.1676	19.6321	21.419	0.00019066	0.000257536	0.000337173
RGU293360N0923948E	RGS293360N0923948E	Active	Western	0.0372179	15.5446	17.0862	18.9671	0.000208274	0.00028616	0.000381195	12.1446	13.6862	15.5671	0.000162719	0.000229217	0.000312863	18.9446	20.4862	22.3671	0.000253829	0.000343104	0.000449527
RGU293354N0923998E	RGS293354N0923998E	Transitional	Western	0.0528412	13.4376	14.7702	16.3962	0.000255621	0.000351213	0.000467853	10.0376	11.3702	12.9962	0.000190943	0.000270366	0.000370836	16.8376	18.1702	19.7962	0.000320299	0.00043206	0.000564869
RGU293403N0923993E	RGS293403N0923993E	Active	Western	0.0174121	15.7059	17.2635	19.164	9.84504e-05	0.000135267	0.00018019	12.3059	13.8635	15.764	7.7138e-05	0.000108627	0.000148221	19.1059	20.6635	22.564	0.000119763	0.000161907	0.000212158
RGU293812N0923868E	RGS293812N0923868E	Active	Western	0.210485	15.3511	16.8735	18.731	0.00116323	0.00159823	0.002129	11.9511	13.4735	15.331	0.000905593	0.00127619	0.00174255	18.7511	20.2735	22.131	0.00142086	0.00192027	0.00251546
RGU293858N0923973E	RGS293858N0923973E	Active	Western	0.157129	14.9406	16.4223	18.2302	0.000845136	0.00116118	0.00154682	11.5406	13.0223	14.8302	0.000652811	0.000920778	0.00125833	18.3406	19.8223	21.6302	0.00103746	0.00140159	0.00183531
RGU293687N0923895E	RGS293687N0923895E	Active	Western	0.0376761	11.0168	12.1094	13.4424	0.000149426	0.000205305	0.000273488	7.61684	8.70937	10.0424	0.00010331	0.000147661	0.000204315	14.4168	15.5094	16.8424	0.000195541	0.00026295	0.000342661
RGU293609N0923954E	RGS293609N0923954E	Active	Western	0.119374	12.6832	13.941	15.4757	0.000545058	0.000748888	0.000997597	9.28322	10.541	12.0757	0.000398944	0.000566246	0.000778426	16.0832	17.341	18.8757	0.000691172	0.000931531	0.00121677
RGU293503N0924085E	RGS293503N0924085E	Active	Western	0.0639643	14.8923	16.3692	18.1712	0.000342928	0.00047117	0.000627647	11.4923	12.9692	14.7712	0.000264636	0.000373305	0.000510209	18.2923	19.7692	21.5712	0.00042122	0.000569035	0.000745085
RGU293509N0923993E	RGS293509N0923993E	Active	Western	0.0196967	12.4137	13.6448	15.1469	8.80232e-05	0.000120941	0.000161105	9.01372	10.2448	11.7469	6.39145e-05	9.08046e-05	0.000124942	15.8137	17.0448	18.5469	0.000112132	0.000151076	0.000197268
RGU293671N0923993E	RGS293671N0923993E	Transitional	Western	0.0434924	24.6489	27.0933	30.0759	0.000385934	0.000530258	0.000706359	21.2489	23.6933	26.6759	0.000332699	0.000463715	0.000626507	28.0489	30.4933	33.4759	0.000439169	0.000596802	0.000786211
RGU293811N0923962E	RGS293811N0923962E	Active	Western	0.0476209	20.18	22.1812	24.6231	0.000345956	0.00047533	0.000633189	16.78	18.7812	21.2231	0.000287668	0.00040247	0.000545757	23.58	25.5812	28.0231	0.000404244	0.00054819	0.000720621
RGU293397N0924275E	RGS293397N0924275E	Active	Western	0.0569119	10.617	11.6699	12.9546	0.000217524	0.00029887	0.000398126	7.217	8.26988	9.55457	0.000147864	0.000211795	0.000293635	14.017	15.0699	16.3546	0.000287184	0.000385945	0.000502616
RGU293496N0924286E	RGS293496N0924286E	Active	Western	0.047129	12.1845	13.3928	14.8672	0.000206727	0.000284035	0.000378364	8.78449	9.99281	11.4672	0.000149041	0.000211928	0.000291836	15.5845	16.7928	18.2672	0.000264413	0.000356143	0.000464893
RGU293490N0924360E	RGS293490N0924360E	Active	Western	0.0805971	10.4968	11.5378	12.8079	0.000304565	0.00041846	0.000557432	7.09681	8.13777	9.40792	0.000205914	0.000295146	0.000409456	13.8968	14.9378	16.2079	0.000403215	0.000541774	0.000705408
RGU293547N0924272E	RGS293547N0924272E	Active	Western	0.0573904	12.8477	14.1218	15.6764	0.000265441	0.000364705	0.000485825	9.44772	10.7218	12.2764	0.000195195	0.000276898	0.000380456	16.2477	17.5218	19.0764	0.000335686	0.000452512	0.000591194
RGU293604N0924223E	RGS293604N0924223E	Active	Western	0.0644776	13.7468	15.11	16.7734	0.000319089	0.000438416	0.000584016	10.3468	11.71	13.3734	0.000240169	0.000339766	0.000465635	17.1468	18.51	20.1734	0.00039801	0.000537067	0.000702397
RGU293628N0924198E	RGS293628N0924198E	Active	Western	0.0101913	18.1318	19.93	22.124	6.65235e-05	9.14007e-05	0.000121755	14.7318	16.53	18.724	5.40493e-05	7.58079e-05	0.000103044	21.5318	23.33	25.524	7.89976e-05	0.000106993	0.000140466
RGU293646N0924180E	RGS293646N0924180E	Active	Western	0.0261334	13.0304	14.3226	15.8993	0.000122591	0.000168435	0.000224373	9.63041	10.9226	12.4993	9.06033e-05	0.000128451	0.000176392	16.4304	17.7226	19.2993	0.000154578	0.000208419	0.000272354
RGU293660N0924177E	RGS293660N0924177E	Active	Western	0.109894	14.1417	15.5441	17.2553	0.00055947	0.000768691	0.00102398	10.7417	12.1441	13.8553	0.000424961	0.000600553	0.000822211	17.5417	18.9441	20.6553	0.00069398	0.000936828	0.00122574
RGU293694N0924161E	RGS293694N0924161E	Active	Western	0.0976084	11.9863	13.175	14.6254	0.000421187	0.000578695	0.000770881	8.58631	9.77498	11.2254	0.000301714	0.000429354	0.000591672	15.3863	16.575	18.0254	0.00054066	0.000728036	0.00095009
RGU293639N0924295E	RGS293639N0924295E	Active	Western	0.019111	12.8428	14.1165	15.6705	8.83582e-05	0.000121401	0.000161718	9.44285	10.7165	12.2705	6.49664e-05	9.2161e-05	0.000126631	16.2428	17.5165	19.0705	0.00011175	0.000150641	0.000196806
RGU293767N0924153E	RGS293767N0924153E	Active	Western	0.0237172	9.00562	9.8987	10.9884	7.68916e-05	0.000105646	0.000140731	5.60562	6.4987	7.58841	4.78618e-05	6.93588e-05	9.71868e-05	12.4056	13.2987	14.3884	0.000105921	0.000141933	0.000184276
RGU293633N0924165E	RGS293633N0924165E	Active	Western	0.031984	15.1424	16.6441	18.4764	0.000174354	0.000239555	0.000319112	11.7424	13.2441	15.0764	0.000135205	0.00019062	0.000260389	18.5424	20.0441	21.8764	0.000213502	0.00028849	0.000377835
RGU293645N0924159E	RGS293645N0924159E	Active	Western	0.0110713	13.0187	14.3097	15.885	5.18882e-05	7.12924e-05	9.49689e-05	9.61867	10.9097	12.485	3.83369e-05	5.43533e-05	7.46419e-05	16.4187	17.7097	19.285	6.54396e-05	8.82316e-05	0.000115296
RGU293654N0924150E	RGS293654N0924150E	Active	Western	0.0120914	10.7257	11.7894	13.0872	4.6688e-05	6.41475e-05	8.5451e-05	7.3257	8.38936	9.6872	3.18881e-05	4.56476e-05	6.32512e-05	14.1257	15.1894	16.4872	6.14878e-05	8.26473e-05	0.000107651
RGU293666N0924143E	RGS293666N0924143E	Active	Western	0.0215045	16.2774	17.8916	19.8612	0.000126013	0.000173137	0.000230637	12.8774	14.4916	16.4612	9.96918e-05	0.000140235	0.000191155	19.6774	21.2916	23.2612	0.000152335	0.000206039	0.000270119
RGU293678N0924130E	RGS293678N0924130E	Active	Western	0.0166579	11.9341	13.1176	14.5617	7.15672e-05	9.83305e-05	0.000130986	8.53413	9.71763	11.1617	5.11779e-05	7.28439e-05	0.000100402	15.3341	16.5176	17.9617	9.19564e-05	0.000123817	0.00016157
RGU293702N0924129E	RGS293702N0924129E	Active	Western	0.0315819	16.7636	18.4261	20.4545	0.000190594	0.000261869	0.000348837	13.3636	15.0261	17.0545	0.000151938	0.000213549	0.000290852	20.1636	21.8261	23.8545	0.000229251	0.00031019	0.000406821
RGU293560N0924211E	RGS293544N0924219E	Transitional	Western	0.0940922	16.2817	17.8963	19.8664	0.000551512	0.000757756	0.00100941	12.8817	14.4963	16.4664	0.000436343	0.000613794	0.000836655	19.6817	21.2963	23.2664	0.00066668	0.000901717	0.00118216
RGU293505N0924187E	RGS293544N0924219E	Active	Western	0.10305	15.9978	17.5843	19.5201	0.000593486	0.000815427	0.00108623	12.5978	14.1843	16.1201	0.000467353	0.000657761	0.000897034	19.3978	20.9843	22.9201	0.000719619	0.000973093	0.00127543
RGU293468N0924156E	RGS293544N0924219E	Active	Western	0.0612991	10.4351	11.47	12.7326	0.000230279	0.000316394	0.00042147	7.03512	8.06996	9.33265	0.000155249	0.000222607	0.000308925	13.8351	14.87	16.1326	0.000305309	0.000410182	0.000534015
RGU293498N0924235E	RGS293544N0924219E	Active	Western	0.0333211	14.5919	16.039	17.8046	0.000175039	0.000240496	0.000320366	11.1919	12.639	14.4046	0.000134254	0.000189515	0.000259188	17.9919	19.439	21.2046	0.000215824	0.000291478	0.000381544
RGU293608N0924354E	RGS293608N0924354E	Active	Western	0.10182	20.5706	22.6106	25.0997	0.000754018	0.00103599	0.00138005	17.1706	19.2106	21.6997	0.000629391	0.000880208	0.00119311	23.9706	26.0106	28.4997	0.000878646	0.00119178	0.00156699
RGU293740N0924328E	RGS293740N0924328E	Active	Western	0.0239873	11.0891	12.1888	13.5306	9.57592e-05	0.000131569	0.000175264	7.68909	8.78878	10.1306	6.63987e-05	9.48688e-05	0.000131223	14.4891	15.5888	16.9306	0.00012512	0.00016827	0.000219305
RGU293700N0924375E	RGS293700N0924375E	Active	Western	0.0491516	19.4179	21.3436	23.6932	0.000343591	0.000472081	0.000628861	16.0179	17.9436	20.2932	0.00028343	0.000396879	0.000538619	22.8179	24.7436	27.0932	0.000403753	0.000547283	0.000719103
RGU293649N0924463E	RGS293649N0924463E	Active	Western	0.308239	14.6448	16.0971	17.8692	0.00162507	0.00223279	0.00297431	11.2448	12.6971	14.4692	0.00124779	0.00176118	0.00240838	18.0448	19.4971	21.2692	0.00200236	0.0027044	0.00354023
RGU293573N0924453E	RGS293573N0924453E	Active	Central	0.0512574	11.1081	12.2097	13.5538	0.000204974	0.000281627	0.000375156	7.70811	8.80969	10.1538	0.000142235	0.000203203	0.000281047	14.5081	15.6097	16.9538	0.000267714	0.000360051	0.000469265
RGU293765N0924299E	RGS293765N0924299E	Active	Western	0.0270494	9.58447	10.535	11.6947	9.33316e-05	0.000128234	0.000170821	6.18447	7.13496	8.29471	6.02231e-05	8.68484e-05	0.000121158	12.9845	13.935	15.0947	0.00012644	0.00016962	0.000220484
RGU293801N0924236E	RGS293801N0924236E	Active	Western	0.0863912	13.568	14.9135	16.5553	0.000421976	0.000579779	0.000772326	10.168	11.5135	13.1553	0.000316234	0.000447601	0.000613712	16.968	18.3135	19.9553	0.000527719	0.000711958	0.00093094
RGU293205N0924375E	RGS293205N0924375E	Active	Western	0.0486913	13.1505	14.4547	16.0459	0.000230514	0.000316717	0.0004219	9.75053	11.0547	12.6459	0.000170916	0.00024222	0.000332503	16.5505	17.8547	19.4459	0.000290112	0.000391215	0.000511297
RGU293289N0924347E	RGS293289N0924347E	Active	Western	0.0126729	10.439	11.4743	12.7374	4.76256e-05	6.54357e-05	8.71671e-05	7.03903	8.07426	9.33741	3.21139e-05	4.60461e-05	6.38996e-05	13.839	14.8743	16.1374	6.31373e-05	8.48253e-05	0.000110435
RGU293126N0924388E	RGS293126N0924388E	Active	Western	0.415629	17.5357	19.2747	21.3966	0.0026238	0.00360501	0.00480224	14.1357	15.8747	17.9966	0.00211508	0.00296909	0.00403915	20.9357	22.6747	24.7966	0.00313253	0.00424092	0.00556534
RGU293209N0924477E	RGS293209N0924477E	Active	Central	0.0717873	20.3979	22.4207	24.8889	0.000527151	0.000724285	0.000964823	16.9979	19.0207	21.4889	0.000439283	0.000614451	0.000833021	23.7979	25.8207	28.2889	0.000615019	0.00083412	0.00109662
RGU293218N0924493E	RGS293218N0924493E	Active	Central	0.0381512	18.3289	20.1466	22.3644	0.000251737	0.000345877	0.000460744	14.9289	16.7466	18.9644	0.00020504	0.000287506	0.000390699	21.7289	23.5466	25.7644	0.000298434	0.000404249	0.00053079
RGU293195N0924490E	RGS293195N0924490E	Active	Central	0.0128172	9.86711	10.8456	12.0396	4.55288e-05	6.25548e-05	8.33294e-05	6.46711	7.44562	8.63958	2.98405e-05	4.29445e-05	5.9797e-05	13.2671	14.2456	15.4396	6.1217e-05	8.21651e-05	0.000106862
RGU293334N0924431E	RGS293334N0924431E	Active	Western	0.13992	16.6977	18.3536	20.374	0.000841085	0.00115562	0.0015394	13.2977	14.9536	16.974	0.000669822	0.00094154	0.00128251	20.0977	21.7536	23.774	0.00101235	0.0013697	0.0017963
RGU293356N0924327E	RGS293356N0924327E	Active	Western	0.0177323	9.63865	10.5945	11.7608	6.15297e-05	8.45394e-05	0.000112615	6.23865	7.1945	8.36081	3.98253e-05	5.74089e-05	8.00586e-05	13.0386	13.9945	15.1608	8.3234e-05	0.00011167	0.000145172
RGU292967N0924485E	RGS292967N0924485E	Active	Central	0.0526575	13.9839	15.3707	17.0628	0.000265089	0.000364222	0.000485181	10.5839	11.9707	13.6628	0.000200636	0.000283656	0.000388502	17.3839	18.7707	20.4628	0.000329542	0.000444788	0.00058186
RGU292972N0924442E	RGS292972N0924442E	Active	Western	0.112493	10.7746	11.8431	13.1469	0.000436344	0.00059952	0.000798622	7.37462	8.44313	9.74689	0.000298653	0.000427406	0.000592086	14.1746	15.2431	16.5469	0.000574035	0.000771634	0.00100516
RGU293122N0924479E	RGS293122N0924479E	Active	Central	0.0529875	11.8881	13.067	14.5055	0.000226772	0.000311576	0.000415051	8.48812	9.66705	11.1055	0.000161915	0.000230505	0.000317766	15.2881	16.467	17.9055	0.000291628	0.000392646	0.000512336
RGU292787N0924444E	RGS292787N0924444E	Transitional	Western	0.0771618	10.0032	10.9952	12.2056	0.000277872	0.000381785	0.000508577	6.60322	7.59522	8.80565	0.000183426	0.000263728	0.000366908	13.4032	14.3952	15.6056	0.000372318	0.000499843	0.000650246
RGU294268N0924427E	RGS294268N0924427E	Active	Western	0.0509596	13.4418	14.7748	16.4013	0.000246595	0.000338812	0.000451333	10.0418	11.3748	13.0013	0.000184221	0.000260844	0.000357771	16.8418	18.1748	19.8013	0.00030897	0.00041678	0.000544895
RGU294329N0924448E	RGS294329N0924448E	Active	Central	0.0103216	12.8642	14.1399	15.6965	4.78004e-05	6.56759e-05	8.74871e-05	9.4642	10.7399	12.2965	3.51668e-05	4.98839e-05	6.85367e-05	16.2642	17.5399	19.0965	6.04341e-05	8.1468e-05	0.000106438
RGU294515N0924483E	RGS294515N0924483E	Transitional	Central	0.188036	20.482	22.5131	24.9915	0.00138648	0.00190497	0.00253762	17.082	19.1131	21.5915	0.00115633	0.00161728	0.00219239	23.882	25.9131	28.3915	0.00161664	0.00219267	0.00288285
RGU294558N0924508E	RGS294558N0924508E	Transitional	Central	0.069541	20.7417	22.7986	25.3085	0.000519264	0.000713449	0.000950387	17.3417	19.3986	21.9085	0.000434146	0.000607051	0.00082271	24.1417	26.1986	28.7085	0.000604382	0.000819846	0.00107806
RGU293578N0924424E	RGS293578N0924424E	Active	Central	0.0520655	14.6283	16.079	17.8491	0.000274187	0.000376723	0.000501833	11.2283	12.679	14.4491	0.000210459	0.000297062	0.000406241	18.0283	19.479	21.2491	0.000337915	0.000456383	0.000597426
RGU297504N0926032E	RGS297504N0926032E	Transitional	Central	0.137142	15.221	16.7304	18.5722	0.000751475	0.0010325	0.00137539	11.821	13.3304	15.1722	0.000583613	0.000822671	0.0011236	18.621	20.1304	21.9722	0.000919337	0.00124232	0.00162719
RGU297631N0926071E	RGS297631N0926071E	Active	Central	0.258432	15.5713	17.1155	18.9997	0.00144869	0.00199044	0.00265147	12.1713	13.7155	15.5997	0.00113236	0.00159504	0.00217699	18.9713	20.5155	22.3997	0.00176501	0.00238584	0.00312595
RGU297340N0926144E	RGS297340N0926144E	Active	Central	0.144029	16.6207	18.2689	20.2801	0.000861786	0.00118406	0.00157729	13.2207	14.8689	16.8801	0.000685495	0.000963697	0.00131286	20.0207	21.6689	23.6801	0.00103808	0.00140442	0.00184173
RGU297326N0926098E	RGS297326N0926098E	Active	Central	0.137166	14.2763	15.692	17.4195	0.000704962	0.00096859	0.00129026	10.8763	12.292	14.0195	0.00053707	0.000758725	0.00103842	17.6763	19.092	20.8195	0.000872854	0.00117845	0.0015421
RGU297306N0926036E	RGS297306N0926036E	Transitional	Central	0.182221	18.483	20.316	22.5525	0.00121248	0.0016659	0.00221915	15.083	16.916	19.1525	0.000989442	0.0013871	0.00188459	21.883	23.716	25.9525	0.00143552	0.0019447	0.00255371
RGU297371N0925998E	RGS297371N0925998E	Active	Central	0.185402	12.0315	13.2247	14.6805	0.000803039	0.00110334	0.00146977	8.63151	9.82466	11.2805	0.000576107	0.00081968	0.00112937	15.4315	16.6247	18.0805	0.00102997	0.00138701	0.00181017
RGU297162N0926049E	RGS297162N0926049E	Active	Central	0.342129	20.4723	22.5026	24.9798	0.00252151	0.00346446	0.00461501	17.0723	19.1026	21.5798	0.00210274	0.002941	0.00398686	23.8723	25.9026	28.3798	0.00294028	0.00398791	0.00524316
RGU297150N0926087E	RGS297150N0926087E	Active	Central	0.0616092	19.0494	20.9385	23.2435	0.000422502	0.000580502	0.000773288	15.6494	17.5385	19.8435	0.000347093	0.00048624	0.000660174	22.4494	24.3385	26.6435	0.000497912	0.000674764	0.000886403
RGU297154N0926170E	RGS297154N0926170E	Active	Central	0.0532107	14.1784	15.5844	17.3001	0.000271599	0.000373166	0.000497096	10.7784	12.1844	13.9001	0.000206469	0.000291754	0.000399401	17.5784	18.9844	20.7001	0.000336729	0.000454579	0.000594791
RGU296914N0926221E	RGS296914N0926221E	Active	Central	0.167921	26.7942	29.4514	32.6936	0.00161975	0.00222547	0.00296456	23.3942	26.0514	29.2936	0.00141421	0.00196855	0.00265625	30.1942	32.8514	36.0936	0.00182528	0.00248239	0.00327286
RGU296976N0926192E	RGS296976N0926192E	Transitional	Central	0.0611626	18.1441	19.9434	22.1389	0.000399506	0.000548906	0.0007312	14.7441	16.5434	18.7389	0.000324643	0.000455327	0.000618905	21.5441	23.3434	25.5389	0.000474369	0.000642485	0.000843494
RGU296944N0926058E	RGS296944N0926058E	Transitional	Central	0.0255786	18.6264	20.4736	22.7274	0.000171518	0.000235659	0.000313922	15.2264	17.0736	19.3274	0.00014021	0.000196523	0.000266959	22.0264	23.8736	26.1274	0.000202826	0.000274794	0.000360884
RGU296817N0926002E	RGS296817N0926002E	Active	Central	0.126043	19.2432	21.1515	23.48	0.000873171	0.0011997	0.00159813	15.8432	17.7515	20.08	0.000718894	0.00100686	0.00136671	22.6432	24.5515	26.88	0.00102745	0.00139255	0.00182954
RGU296694N0926127E	RGS296694N0926127E	Transitional	Central	0.0612832	11.2703	12.388	13.7518	0.000248646	0.00034163	0.000455086	7.87034	8.98801	10.3518	0.000173635	0.000247866	0.00034257	14.6703	15.788	17.1518	0.000323656	0.000435393	0.000567602
RGU296616N0926070E	RGS296616N0926070E	Transitional	Central	0.0489976	11.2827	12.4015	13.7668	0.000199016	0.000273441	0.000364251	7.88266	9.00155	10.3668	0.000139043	0.000198474	0.000274292	14.6827	15.8015	17.1668	0.000258989	0.000348407	0.000454211
RGU297736N0926536E	RGS297736N0926536E	Transitional	Central	0.264575	16.4324	18.0619	20.0503	0.00156513	0.00215043	0.0028646	13.0324	14.6619	16.6503	0.00124129	0.00174563	0.00237884	19.8324	21.4619	23.4503	0.00188897	0.00255523	0.00335036
RGU297769N0926551E	RGS297769N0926551E	Transitional	Central	0.0332933	14.0842	15.4809	17.1851	0.000168807	0.000231934	0.00030896	10.6842	12.0809	13.7851	0.000128056	0.000180995	0.000247833	17.4842	18.8809	20.5851	0.000209558	0.000282873	0.000370086
RGU297868N0926417E	RGS297868N0926417E	Active	Central	0.0551979	16.2996	17.916	19.8883	0.000323894	0.000445017	0.000592809	12.8996	14.516	16.4883	0.000256331	0.000360564	0.000491465	19.6996	21.316	23.2883	0.000391456	0.00052947	0.000694152
RGU297688N0926392E	RGS297471N0926263E	Active	Central	0.177294	18.9209	20.7972	23.0867	0.00120764	0.00165925	0.0022103	15.5209	17.3972	19.6867	0.000990634	0.00138799	0.00188478	22.3209	24.1972	26.4867	0.00142465	0.00193051	0.00253581
RGU297496N0926514E	RGS297471N0926263E	Active	Central	0.0157161	17.0472	18.7377	20.8005	9.64496e-05	0.000132518	0.000176528	13.6472	15.3377	17.4005	7.72131e-05	0.000108472	0.000147673	20.4472	22.1377	24.2005	0.000115686	0.000156564	0.000205383
RGU297463N0926237E	RGS297471N0926263E	Active	Central	0.0278271	17.9565	19.7372	21.91	0.000179884	0.000247153	0.000329234	14.5565	16.3372	18.51	0.000145823	0.000204578	0.000278143	21.3565	23.1372	25.31	0.000213944	0.000289729	0.000380324
RGU297465N0926222E	RGS297465N0926222E	Active	Central	0.0880255	19.4283	21.355	23.7058	0.000615666	0.000845901	0.00112683	16.0283	17.955	20.3058	0.000507923	0.000711222	0.000965213	22.8283	24.755	27.1058	0.000723409	0.00098058	0.00128844
RGU297467N0926283E	RGS297467N0926283E	Active	Central	0.0979503	9.30037	10.2227	11.348	0.000327951	0.000450591	0.000600234	5.90037	6.82268	7.94805	0.000208059	0.000300727	0.000420397	12.7004	13.6227	14.748	0.000447842	0.000600455	0.000780071
RGU297410N0926328E	RGS297410N0926328E	Active	Central	0.0186712	12.0121	13.2033	14.6568	8.07411e-05	0.000110935	0.000147777	8.61211	9.80334	11.2568	5.78875e-05	8.23682e-05	0.000113497	15.4121	16.6033	18.0568	0.000103595	0.000139502	0.000182057
RGU297309N0926411E	RGS297309N0926411E	Active	Central	0.13391	18.0776	19.8703	22.0578	0.000871478	0.00119738	0.00159503	14.6776	16.4703	18.6578	0.000707572	0.000992495	0.00134917	21.4776	23.2703	25.4578	0.00103538	0.00140226	0.00184089
RGU297004N0926353E	RGS297004N0926353E	Active	Central	0.0990989	16.7441	18.4046	20.4307	0.000597357	0.000820745	0.00109332	13.3441	15.0046	17.0307	0.00047606	0.000669124	0.000911372	20.1441	21.8046	23.8307	0.000718654	0.000972367	0.00127526
RGU296963N0926314E	RGS296963N0926314E	Transitional	Central	0.0352942	12.2546	13.4698	14.9527	0.000155705	0.000213933	0.000284981	8.85455	10.0698	11.5527	0.000112505	0.000159933	0.000220181	15.6546	16.8698	18.3527	0.000198906	0.000267933	0.000349781
RGU296921N0926258E	RGS296921N0926258E	Transitional	Central	0.065452	10.7651	11.8326	13.1352	0.000253654	0.000348511	0.000464252	7.36506	8.43262	9.73523	0.000173541	0.000248369	0.000344082	14.1651	15.2326	16.5352	0.000333767	0.000448652	0.000584422
RGU296133N0926251E	RGS296133N0926251E	Transitional	Central	0.188974	17.6882	19.4423	21.5826	0.00120334	0.00165334	0.00220242	14.2882	16.0423	18.1826	0.000972035	0.00136421	0.00185547	21.0882	22.8423	24.9826	0.00143464	0.00194247	0.00254938
RGU296113N0926261E	RGS296113N0926261E	Transitional	Central	0.0388788	15.882	17.457	19.3787	0.00022229	0.000305418	0.000406848	12.482	14.057	15.9787	0.000174702	0.000245933	0.000335467	19.282	20.857	22.7787	0.000269878	0.000364903	0.00047823
RGU296175N0926427E	RGS296175N0926427E	Transitional	Central	0.10157	14.4463	15.8789	17.6269	0.000528232	0.000725771	0.000966801	11.0463	12.4789	14.2269	0.00040391	0.000570368	0.000780318	17.8463	19.2789	21.0269	0.000652554	0.000881173	0.00115328
RGU296337N0926392E	RGS296337N0926392E	Transitional	Central	0.0815269	14.1211	15.5215	17.2302	0.00041445	0.000569439	0.000758551	10.7211	12.1215	13.8302	0.000314661	0.000444703	0.000608868	17.5211	18.9215	20.6302	0.000514239	0.000694175	0.000908235
RGU296271N0926409E	RGS296271N0926409E	Transitional	Central	0.0401535	11.9419	13.1262	14.5712	0.000172623	0.000237178	0.000315945	8.54191	9.72618	11.1712	0.000123476	0.000175743	0.000242224	15.3419	16.5262	17.9712	0.000221771	0.000298613	0.000389667
RGU296191N0926644E	RGS296191N0926644E	Active	Central	0.138827	16.6758	18.3295	20.3473	0.000833418	0.00114508	0.00152537	13.2758	14.9295	16.9473	0.000663494	0.000932678	0.00127048	20.0758	21.7295	23.7473	0.00100334	0.00135749	0.00178026
RGU296129N0926671E	RGS296129N0926671E	Active	Central	0.0212834	15.1175	16.6167	18.446	0.000115831	0.000159147	0.000212	11.7175	13.2167	15.046	8.978e-05	0.000126584	0.000172924	18.5175	20.0167	21.846	0.000141882	0.000191711	0.000251077
RGU296653N0926533E	RGS296653N0926533E	Active	Central	0.139011	13.2139	14.5243	16.1232	0.000661276	0.000908567	0.00121031	9.81391	11.1243	12.7232	0.000491127	0.000695881	0.000955082	16.6139	17.9243	19.5232	0.000831425	0.00112125	0.00146553
RGU296665N0926515E	RGS296665N0926515E	Active	Central	0.167283	17.4409	19.1705	21.2809	0.00105032	0.0014431	0.00192236	14.0409	15.7705	17.8809	0.000845567	0.00118716	0.00161523	20.8409	22.5705	24.6809	0.00125507	0.00169904	0.00222949
RGU296717N0926489E	RGS296717N0926489E	Transitional	Central	0.077352	13.2306	14.5427	16.1436	0.000368429	0.000506208	0.000674321	9.83061	11.1427	12.7436	0.00027375	0.000387859	0.000532303	16.6306	17.9427	19.5436	0.000463108	0.000624556	0.000816339
RGU296998N0926256E	RGS296998N0926256E	Transitional	Central	0.0399806	13.2541	14.5685	16.1723	0.000190766	0.000262106	0.000349152	9.85409	11.1685	12.7723	0.00014183	0.000200935	0.000275747	16.6541	17.9685	19.5723	0.000239703	0.000323276	0.000422556
RGU296999N0926511E	RGS296999N0926511E	Transitional	Central	0.0357187	13.7378	15.1001	16.7625	0.00017665	0.000242711	0.000323316	10.3378	11.7001	13.3625	0.000132931	0.000188061	0.000257736	17.1378	18.5001	20.1625	0.00022037	0.00029736	0.000388895
RGU296940N0926496E	RGS296940N0926496E	Transitional	Central	0.092499	21.4691	23.5982	26.1961	0.000714915	0.000982266	0.00130848	18.0691	20.1982	22.7961	0.000601696	0.000840742	0.00113865	24.8691	26.9982	29.5961	0.000828134	0.00112379	0.00147831
RGU297892N0927020E	RGS297892N0927020E	Transitional	Central	0.13729	18.3384	20.157	22.376	0.000906366	0.00124531	0.00165888	14.9384	16.757	18.976	0.000738323	0.00103526	0.00140682	21.7384	23.557	25.776	0.00107441	0.00145537	0.00191095
RGU297877N0927038E	RGS297877N0927038E	Active	Central	0.0241368	10.211	11.2236	12.4592	8.87256e-05	0.000121906	0.000162391	6.81098	7.82359	9.05915	5.91822e-05	8.49763e-05	0.000118076	13.611	14.6236	15.8592	0.000118269	0.000158835	0.000206706
RGU298133N0927106E	RGS298133N0927106E	Active	Central	0.0247177	10.892	11.9721	13.2901	9.69208e-05	0.000133165	0.00017739	7.49197	8.57211	9.89008	6.66663e-05	9.53474e-05	0.000132008	14.292	15.3721	16.6901	0.000127175	0.000170984	0.000222772
RGU298317N0927036E	RGS298317N0927036E	Transitional	Central	0.0409185	17.4189	19.1463	21.2541	0.000256592	0.000352547	0.000469629	14.0189	15.7463	17.8541	0.000206508	0.000289942	0.000394503	20.8189	22.5463	24.6541	0.000306676	0.000415152	0.000544756
RGU298285N0927016E	RGS298285N0927016E	Transitional	Central	0.0820394	18.2241	20.0313	22.2365	0.000538234	0.000739512	0.000985106	14.8241	16.6313	18.8365	0.000437817	0.000613992	0.000834482	21.6241	23.4313	25.6365	0.00063865	0.000865032	0.00113573
RGU297759N0927188E	RGS296123N0926809E	Transitional	Central	0.0339876	17.4555	19.1865	21.2987	0.000213577	0.000293446	0.000390901	14.0555	15.7865	17.8987	0.000171976	0.000241445	0.0003285	20.8555	22.5865	24.6987	0.000255178	0.000345447	0.000453302
RGU296101N0926697E	RGS296123N0926809E	Active	Central	0.0299337	18.0568	19.8475	22.0324	0.000194582	0.000267348	0.000356135	14.6568	16.4475	18.6324	0.000157943	0.00022155	0.000301177	21.4568	23.2475	25.4324	0.000231221	0.000313147	0.000411093
RGU296292N0926877E	RGS296292N0926877E	Active	Central	0.0323973	14.4824	15.9186	17.671	0.000168909	0.000232074	0.000309146	11.0824	12.5186	14.271	0.000129254	0.000182506	0.000249665	17.8824	19.3186	21.071	0.000208563	0.000281642	0.000368628
RGU296390N0926980E	RGS296390N0926980E	Active	Central	0.0170282	13.6538	15.0078	16.66	8.36996e-05	0.000115	0.000153192	10.2538	11.6078	13.26	6.28571e-05	8.89469e-05	0.000121928	17.0538	18.4078	20.06	0.000104542	0.000141053	0.000184456
RGU296364N0926859E	RGS296364N0926859E	Transitional	Central	0.131127	13.2557	14.5702	16.1742	0.000625743	0.000859746	0.00114527	9.85568	11.1702	12.7742	0.000465243	0.000659122	0.000904522	16.6557	17.9702	19.5742	0.000786242	0.00106037	0.00138602
RGU296391N0926894E	RGS296391N0926894E	Transitional	Central	0.593765	23.4729	25.8006	28.6409	0.00501745	0.00689378	0.00918323	20.0729	22.4006	25.2409	0.00429068	0.00598532	0.00809308	26.8729	29.2006	32.0409	0.00574422	0.00780224	0.0102734
RGU296583N0926826E	RGS296583N0926826E	Active	Central	0.205435	15.3161	16.8349	18.6882	0.00113272	0.00155632	0.00207317	11.9161	13.4349	15.2882	0.00088127	0.001242	0.001696	18.7161	20.2349	22.0882	0.00138417	0.00187063	0.00245035
RGU296483N0926802E	RGS296483N0926802E	Active	Central	0.14175	13.6018	14.9506	16.5965	0.000694097	0.000953662	0.00127038	10.2018	11.5506	13.1965	0.000520595	0.000736785	0.00101012	17.0018	18.3506	19.9965	0.000867599	0.00117054	0.00153063
RGU296787N0926694E	RGS296787N0926694E	Active	Central	0.314774	17.4711	19.2037	21.3178	0.0019798	0.00272017	0.00362355	14.0711	15.8037	17.9178	0.00159452	0.00223857	0.00304563	20.8711	22.6037	24.7178	0.00236509	0.00320178	0.00420148
RGU296764N0926769E	RGS296764N0926769E	Active	Central	0.211741	20.7999	22.8626	25.3794	0.00158551	0.00217843	0.00290189	17.3999	19.4626	21.9794	0.00132634	0.00185446	0.00251313	24.1999	26.2626	28.7794	0.00184468	0.00250239	0.00329065
RGU297017N0926763E	RGS297017N0926763E	Transitional	Central	0.112317	18.5426	20.3814	22.6252	0.000749753	0.00103013	0.00137224	15.1426	16.9814	19.2252	0.000612277	0.000858287	0.00116603	21.9426	23.7814	26.0252	0.000887229	0.00120198	0.00157846
RGU297344N0926725E	RGS297344N0926725E	Active	Central	0.0294193	18.1972	20.0019	22.2038	0.000192726	0.000264798	0.000352738	14.7972	16.6019	18.8038	0.000156717	0.000219786	0.000298724	21.5972	23.4019	25.6038	0.000228735	0.000309809	0.000406752
RGU297214N0926978E	RGS297214N0926978E	Active	Central	0.0540898	14.0545	15.4483	17.1489	0.000273674	0.000376017	0.000500894	10.6545	12.0483	13.7489	0.000207468	0.00029326	0.000401585	17.4545	18.8483	20.5489	0.00033988	0.000458775	0.000600203
RGU296761N0927141E	RGS296761N0927141E	Active	Central	0.136869	13.2971	14.6158	16.2248	0.000655184	0.000900198	0.00119916	9.8971	11.2158	12.8248	0.000487657	0.000690789	0.000947866	16.6971	18.0158	19.6248	0.000822712	0.00110961	0.00145045
RGU296720N0927207E	RGS296720N0927207E	Active	Central	0.072996	14.0002	15.3886	17.0826	0.000367904	0.000505486	0.00067336	10.6002	11.9886	13.6826	0.000278557	0.000393803	0.00053934	17.4002	18.7886	20.4826	0.000457252	0.00061717	0.000807381
RGU297925N0927281E	RGS297925N0927281E	Transitional	Central	0.188057	25.7284	28.2798	31.393	0.00174183	0.0023932	0.00318799	22.3284	24.8798	27.993	0.00151165	0.00210548	0.00284272	29.1284	31.6798	34.793	0.00197201	0.00268093	0.00353327
RGU297768N0927264E	RGS297768N0927264E	Active	Central	0.037348	19.5453	21.4835	23.8486	0.000262791	0.000361065	0.000480976	16.1453	18.0835	20.4486	0.000217077	0.000303923	0.000412405	22.9453	24.8835	27.2486	0.000308505	0.000418208	0.000549547
RGU296200N0927267E	RGS296200N0927267E	Transitional	Central	0.162609	21.6113	23.7545	26.3695	0.00126511	0.00173821	0.00231548	18.2113	20.3545	22.9695	0.00106608	0.00148942	0.00201693	25.0113	27.1545	29.7695	0.00146414	0.00198701	0.00261403
RGU296199N0927361E	RGS296199N0927361E	Transitional	Central	0.0635939	18.894	20.7677	23.054	0.000432556	0.000594315	0.000791689	15.494	17.3677	19.654	0.000354717	0.000497017	0.000674931	22.294	24.1677	26.454	0.000510395	0.000691614	0.000908448
RGU296164N0927326E	RGS296164N0927326E	Transitional	Central	0.103285	19.6605	21.6102	23.9892	0.000731028	0.0010044	0.00133797	16.2605	18.2102	20.5892	0.000604607	0.000846378	0.00114834	23.0605	25.0102	27.3892	0.000857448	0.00116243	0.0015276
RGU296248N0927424E	RGS296248N0927424E	Active	Central	0.431366	18.5052	20.3403	22.5795	0.00287371	0.00394836	0.00525963	15.1052	16.9403	19.1795	0.00234571	0.00328837	0.00446764	21.9052	23.7403	25.9795	0.0034017	0.00460835	0.00605161
RGU296130N0927312E	RGS296130N0927312E	Active	Central	0.124516	16.1859	17.7911	19.7496	0.000725546	0.000996873	0.00132794	12.7859	14.3911	16.3496	0.000573139	0.000806363	0.00109933	19.5859	21.1911	23.1496	0.000877954	0.00118738	0.00155655
RGU296199N0927567E	RGS296199N0927567E	Active	Central	0.119015	19.7645	21.7245	24.1161	0.00084682	0.0011635	0.0015499	16.3645	18.3245	20.7161	0.000701145	0.000981404	0.00133139	23.1645	25.1245	27.5161	0.000992495	0.00134559	0.00176841
RGU296127N0927631E	RGS296127N0927631E	Active	Central	0.11692	16.3864	18.0114	19.9942	0.000689726	0.000947657	0.00126238	12.9864	14.6114	16.5942	0.000546616	0.000768769	0.00104771	19.7864	21.4114	23.3942	0.000832837	0.00112655	0.00147704
RGU296355N0927433E	RGS296355N0927433E	Active	Central	0.216259	15.3984	16.9254	18.7887	0.00119881	0.00164712	0.00219413	11.9984	13.5254	15.3887	0.00093411	0.00131624	0.00179708	18.7984	20.3254	22.1887	0.00146351	0.001978	0.00259118
RGU296390N0927650E	RGS296390N0927650E	Active	Central	0.0107328	9.17732	10.0874	11.1979	3.54593e-05	4.87197e-05	6.48997e-05	5.77732	6.68743	7.79791	2.23224e-05	3.22986e-05	4.51943e-05	12.5773	13.4874	14.5979	4.85962e-05	6.51409e-05	8.46051e-05
RGU296512N0927683E	RGS296512N0927683E	Active	Central	0.112353	12.9761	14.263	15.8331	0.000524846	0.000721118	0.000960603	9.57614	10.863	12.4331	0.000387326	0.000549218	0.000754323	16.3761	17.663	19.2331	0.000662365	0.000893017	0.00116688
RGU296484N0927675E	RGS296484N0927675E	Active	Central	0.0258441	23.0887	25.3784	28.1722	0.000214815	0.000295147	0.000393166	19.6887	21.9784	24.7722	0.000183181	0.000255606	0.000345717	26.4887	28.7784	31.5722	0.000246448	0.000334688	0.000440616
RGU296477N0927638E	RGS296477N0927638E	Active	Central	0.0333358	21.7644	23.9228	26.5563	0.000261192	0.000358868	0.000478049	18.3644	20.5228	23.1563	0.000220389	0.000307864	0.000416845	25.1644	27.3228	29.9563	0.000301995	0.000409872	0.000539254
RGU296661N0927516E	RGS296661N0927516E	Active	Central	0.0232796	15.7059	17.2635	19.1639	0.000131626	0.000180849	0.000240909	12.3059	13.8635	15.7639	0.000103132	0.000145231	0.000198168	19.1059	20.6635	22.5639	0.00016012	0.000216466	0.00028365
RGU296662N0927526E	RGS296662N0927526E	Active	Central	0.357455	18.7643	20.6251	22.8957	0.00241466	0.00331766	0.00441946	15.3643	17.2251	19.4957	0.00197714	0.00277075	0.00376317	22.1643	24.0251	26.2957	0.00285219	0.00386456	0.00507575
RGU296654N0927474E	RGS297438N0927336E	Active	Central	0.143718	25.6837	28.2308	31.3386	0.00132884	0.00182578	0.00243212	22.2837	24.8308	27.9386	0.00115293	0.00160589	0.00216826	29.0837	31.6308	34.7386	0.00150475	0.00204567	0.00269599
RGU296680N0927568E	RGS297438N0927336E	Active	Central	0.118885	21.3889	23.51	26.0981	0.000915415	0.00125774	0.00167545	17.9889	20.11	22.6981	0.000769899	0.00107585	0.00145717	24.7889	26.91	29.4981	0.00106093	0.00143964	0.00189372
RGU297429N0927356E	RGS297438N0927336E	Active	Central	0.0547897	14.4075	15.8363	17.5797	0.000284178	0.00039045	0.000520119	11.0075	12.4363	14.1797	0.000217115	0.000306621	0.000419525	17.8075	19.2363	20.9797	0.000351241	0.000474278	0.000620713
RGU297440N0927322E	RGS297440N0927322E	Active	Central	0.141472	14.7418	16.2038	17.9876	0.000750803	0.00103157	0.00137416	11.3418	12.8038	14.5876	0.000577641	0.000815121	0.00111442	18.1418	19.6038	21.3876	0.000923965	0.00124803	0.00163391
RGU298469N0927476E	RGS298469N0927476E	Transitional	Central	0.0588706	19.2463	21.1549	23.4838	0.000407894	0.000560431	0.000746552	15.8463	17.7549	20.0838	0.000335836	0.000470359	0.000638465	22.6463	24.5549	26.8838	0.000479952	0.000650503	0.000854638
RGU298489N0927545E	RGS298489N0927545E	Transitional	Central	0.333328	19.0391	20.9272	23.231	0.00228466	0.00313904	0.00418152	15.6391	17.5272	19.831	0.00187667	0.00262904	0.00356953	22.4391	24.3272	26.631	0.00269266	0.00364903	0.00479351
RGU298237N0927583E	RGS298237N0927583E	Active	Central	0.0549534	16.0283	17.6178	19.5573	0.000317092	0.000435672	0.00058036	12.6283	14.2178	16.1573	0.000249829	0.000351593	0.000479466	19.4283	21.0178	22.9573	0.000384355	0.000519751	0.000681255
RGU298411N0927658E	RGS298411N0927658E	Active	Central	0.231089	22.144	24.34	27.0195	0.0018422	0.00253111	0.0033717	18.744	20.94	23.6195	0.00155935	0.00217755	0.00294742	25.544	27.74	30.4195	0.00212505	0.00288468	0.00379598
RGU297578N0927312E	RGS297578N0927312E	Transitional	Central	0.0582414	19.7058	21.66	24.0445	0.000413171	0.000567681	0.000756209	16.3058	18.26	20.6445	0.000341883	0.000478571	0.000649278	23.1058	25.06	27.4445	0.000484458	0.00065679	0.00086314
RGU297490N0927455E	RGS297490N0927455E	Transitional	Central	0.0610933	12.0857	13.2843	14.7467	0.000265808	0.00036521	0.000486498	8.68572	9.88425	11.3467	0.00019103	0.000271738	0.000374331	15.4857	16.6843	18.1467	0.000340586	0.000458683	0.000598665
RGU297840N0927616E	RGS297840N0927616E	Transitional	Central	0.043352	9.72006	10.684	11.8602	0.000151698	0.000208428	0.000277647	6.32006	7.28399	8.46015	9.86356e-05	0.000142099	0.000198053	13.1201	14.084	15.2602	0.000204761	0.000274756	0.000357242
RGU297917N0927603E	RGS297917N0927603E	Transitional	Central	0.0982032	11.8239	12.9965	14.4272	0.000418012	0.000574333	0.000765071	8.4239	9.59647	11.0272	0.000297812	0.000424082	0.00058477	15.2239	16.3965	17.8272	0.000538213	0.000724584	0.000945372
RGU297665N0927706E	RGS297665N0927706E	Transitional	Central	0.0270465	11.6875	12.8466	14.2608	0.000113798	0.000156355	0.00020828	8.28754	9.44658	10.8608	8.06935e-05	0.000114973	0.000158623	15.0875	16.2466	17.6608	0.000146903	0.000197736	0.000257938
RGU297695N0927701E	RGS297695N0927701E	Active	Central	0.0196343	23.5638	25.9006	28.7519	0.000166557	0.000228843	0.000304843	20.1638	22.5006	25.3519	0.000142525	0.000198803	0.000268794	26.9638	29.3006	32.1519	0.00019059	0.000258884	0.000340892
RGU297797N0927688E	RGS297797N0927688E	Active	Central	0.165648	18.068	19.8598	22.0461	0.00107745	0.00148038	0.00197202	14.668	16.4598	18.6461	0.0008747	0.00122694	0.00166789	21.468	23.2598	25.4461	0.00128021	0.00173382	0.00227615
RGU296373N0927846E	RGS296373N0927846E	Active	Central	0.0529763	13.0787	14.3757	15.9582	0.00024943	0.000342707	0.000456521	9.67868	10.9757	12.5582	0.000184587	0.000261653	0.000359256	16.4787	17.7757	19.3582	0.000314273	0.000423761	0.000553785
RGU296429N0927830E	RGS296429N0927830E	Active	Central	0.0595568	11.3869	12.5161	13.8939	0.000244139	0.000335438	0.000446838	7.98687	9.11609	10.4939	0.000171242	0.000244316	0.000337492	14.7869	15.9161	17.2939	0.000317037	0.00042656	0.000556184
RGU296486N0927828E	RGS296486N0927828E	Transitional	Central	0.177874	15.9514	17.5333	19.4634	0.00102144	0.00140342	0.0018695	12.5514	14.1333	16.0634	0.000803723	0.00113127	0.00154292	19.3514	20.9333	22.8634	0.00123916	0.00167557	0.00219608
RGU296508N0927792E	RGS296508N0927792E	Active	Central	0.248546	20.307	22.3208	24.778	0.001817	0.00249649	0.00332559	16.907	18.9208	21.378	0.00151278	0.00211622	0.00286926	23.707	25.7208	28.178	0.00212122	0.00287677	0.00378192
RGU296635N0927751E	RGS296635N0927751E	Active	Central	0.0324618	14.683	16.1391	17.9158	0.000171589	0.000235757	0.000314053	11.283	12.7391	14.5158	0.000131856	0.000186091	0.000254453	18.083	19.5391	21.3158	0.000211323	0.000285424	0.000373653
RGU297265N0927941E	RGS297265N0927941E	Active	Central	0.0192546	26.3902	29.0073	32.2006	0.000182928	0.000251335	0.000334805	22.9902	25.6073	28.8006	0.00015936	0.000221876	0.000299453	29.7902	32.4073	35.6006	0.000206495	0.000280795	0.000370156
RGU297292N0927995E	RGS297292N0927995E	Active	Central	0.0772719	17.9203	19.6974	21.8658	0.000498505	0.000684926	0.000912392	14.5203	16.2974	18.4658	0.000403924	0.0005667	0.000770521	21.3203	23.0974	25.2658	0.000593085	0.000803152	0.00105426
RGU297408N0927943E	RGS297408N0927943E	Active	Central	0.198888	17.4161	19.1432	21.2506	0.00124698	0.00171331	0.0022823	14.0161	15.7432	17.8506	0.00100355	0.00140901	0.00191715	20.8161	22.5432	24.6506	0.00149042	0.00201761	0.00264746
RGU297435N0927959E	RGS297435N0927959E	Transitional	Central	0.15083	22.8584	25.1253	27.8912	0.00124119	0.00170534	0.00227169	19.4584	21.7253	24.4912	0.00105657	0.00147457	0.00199477	26.2584	28.5253	31.2912	0.0014258	0.00193611	0.00254862
RGU297542N0928037E	RGS297542N0928037E	Transitional	Central	0.356056	14.2429	15.6553	17.3788	0.00182566	0.00250838	0.00334142	10.8429	12.2553	13.9788	0.00138984	0.00196362	0.0026877	17.6429	19.0553	20.7788	0.00226147	0.00305315	0.00399514
RGU298326N0927983E	RGS298326N0927983E	Transitional	Central	0.115861	16.709	18.3661	20.3879	0.000696934	0.000957561	0.00127557	13.309	14.9661	16.9879	0.00055512	0.000780293	0.00106285	20.109	21.7661	23.7879	0.000838749	0.00113483	0.00148829
RGU298290N0928003E	RGS298290N0928003E	Active	Central	0.122338	15.463	16.9965	18.8676	0.000681016	0.000935689	0.00124643	12.063	13.5965	15.4676	0.000531274	0.000748512	0.00102182	18.863	20.3965	22.2676	0.000830757	0.00112287	0.00147105
RGU298150N0927790E	RGS298150N0927790E	Transitional	Central	0.213427	18.0512	19.8413	22.0255	0.00138694	0.0019056	0.00253845	14.6512	16.4413	18.6255	0.0011257	0.00157905	0.0021466	21.4512	23.2413	25.4255	0.00164817	0.00223214	0.0029303
RGU298146N0927741E	RGS298146N0927741E	Transitional	Central	0.13806	26.0901	28.6774	31.8344	0.00129672	0.00178164	0.00237333	22.6901	25.2774	28.4344	0.00112773	0.00157041	0.00211985	29.4901	32.0774	35.2344	0.0014657	0.00199287	0.00262681
RGU298053N0927741E	RGS298053N0927741E	Transitional	Central	0.167397	24.3833	26.8013	29.7518	0.00146941	0.00201891	0.0026894	20.9833	23.4013	26.3518	0.00126452	0.00176279	0.00238206	27.7833	30.2013	33.1518	0.0016743	0.00227503	0.00299674
RGU297988N0927745E	RGS297988N0927745E	Active	Central	0.117023	23.2982	25.6086	28.4278	0.000981508	0.00134855	0.00179641	19.8982	22.2086	25.0278	0.000838272	0.00116951	0.00158156	26.6982	29.0086	31.8278	0.00112474	0.0015276	0.00201127
RGU297931N0927740E	RGS297931N0927740E	Transitional	Central	0.085026	18.9304	20.8077	23.0984	0.000579448	0.000796139	0.00106054	15.5304	17.4077	19.6984	0.000475376	0.000666049	0.000904432	22.3304	24.2077	26.4984	0.00068352	0.000926229	0.00121665
RGU297537N0927827E	RGS297537N0927827E	Transitional	Central	0.12576	16.9626	18.6448	20.6973	0.000767959	0.00105515	0.00140556	13.5626	15.2448	17.2973	0.000614029	0.000862733	0.00117467	20.3626	22.0448	24.0973	0.000921889	0.00124756	0.00163646
RGU298011N0927998E	RGS298011N0927998E	Transitional	Central	0.372425	14.8406	16.3123	18.1081	0.00198972	0.0027338	0.00364171	11.4406	12.9123	14.7081	0.00153388	0.00216399	0.00295794	18.2406	19.7123	21.5081	0.00244557	0.00330361	0.00432548
RGU298018N0927949E	RGS298018N0927949E	Active	Central	0.0274331	23.4615	25.7882	28.6271	0.000231704	0.000318352	0.000424077	20.0615	22.3882	25.2271	0.000198125	0.000276379	0.00037371	26.8615	29.1882	32.0271	0.000265282	0.000360324	0.000474444
RGU297968N0928039E	RGS297968N0928039E	Active	Central	0.0371843	15.128	16.6283	18.4588	0.000202509	0.00027824	0.000370645	11.728	13.2283	15.0588	0.000156996	0.000221348	0.000302374	18.528	20.0283	21.8588	0.000248023	0.000335132	0.000438915
RGU297732N0928009E	RGS297732N0928009E	Active	Central	0.0766104	16.3264	17.9455	19.9211	0.000450279	0.000618666	0.000824126	12.9264	14.5455	16.5211	0.000356508	0.000501452	0.00068347	19.7264	21.3455	23.3211	0.00054405	0.000735879	0.000964783
RGU297639N0927724E	RGS297639N0927724E	Active	Central	0.0397133	19.4366	21.3641	23.716	0.000277881	0.000381798	0.000508595	16.0366	17.9641	20.316	0.000229272	0.000321037	0.000435681	22.8366	24.7641	27.116	0.00032649	0.00044256	0.000581508
RGU297143N0927889E	RGS297143N0927889E	Active	Central	0.0763792	21.9189	24.0926	26.7449	0.000602695	0.00082808	0.00110309	18.5189	20.6926	23.3449	0.000509207	0.000711219	0.000962855	25.3189	27.4926	30.1449	0.000696183	0.00094494	0.00124332
RGU297122N0927924E	RGS297122N0927924E	Active	Central	0.0473638	12.5284	13.7708	15.2868	0.00021362	0.000293506	0.000390981	9.12836	10.3708	11.8868	0.000155647	0.00022104	0.000304021	15.9284	17.1708	18.6868	0.000271594	0.000365973	0.000477941
RGU297092N0927892E	RGS297092N0927892E	Active	Central	0.0245449	10.2044	11.2163	12.4511	9.01676e-05	0.000123887	0.00016503	6.80437	7.81633	9.05109	6.01246e-05	8.6333e-05	0.000119965	13.6044	14.6163	15.8511	0.000120211	0.00016144	0.000210094
RGU297072N0927831E	RGS297072N0927831E	Active	Central	0.142527	12.726	13.988	15.5279	0.000652968	0.000897153	0.0011951	9.326	10.588	12.1279	0.000478515	0.000679086	0.00093342	16.126	17.388	18.9279	0.000827421	0.00111522	0.00145678
RGU296938N0927823E	RGS296938N0927823E	Transitional	Central	0.232379	22.0169	24.2003	26.8644	0.00184186	0.00253064	0.00337108	18.6169	20.8003	23.4644	0.00155743	0.0021751	0.00294443	25.4169	27.6003	30.2644	0.00212629	0.00288618	0.00379772
RGU296936N0927886E	RGS296253N0927825E	Active	Central	0.0413669	15.8237	17.3929	19.3077	0.000235648	0.000323771	0.000431297	12.4237	13.9929	15.9077	0.000185015	0.00026048	0.000355347	19.2237	20.7929	22.7077	0.000286281	0.000387062	0.000507246
RGU297064N0927983E	RGS296253N0927825E	Active	Central	0.0644564	20.5228	22.558	25.0413	0.000476217	0.000654303	0.0008716	17.1228	19.158	21.6413	0.000397322	0.000555685	0.000753258	23.9228	25.958	28.4413	0.000555111	0.000752922	0.000989942
RGU296250N0927828E	RGS296250N0927828E	Active	Central	0.177052	14.9939	16.4809	18.2952	0.000955694	0.00131309	0.00174917	11.5939	13.0809	14.8952	0.000738982	0.0010422	0.0014241	18.3939	19.8809	21.6952	0.00117241	0.00158398	0.00207423
RGU296240N0927845E	RGS296240N0927845E	Active	Central	0.0239766	12.5123	13.7532	15.2672	0.000108001	0.000148389	0.00019767	9.11233	10.3532	11.8672	7.86536e-05	0.000111705	0.000153649	15.9123	17.1532	18.6672	0.000137348	0.000185073	0.000241691
RGU296296N0927866E	RGS296296N0927866E	Active	Central	0.21989	22.2999	24.5113	27.2097	0.00176527	0.00242541	0.0032309	18.8999	21.1113	23.8097	0.00149612	0.00208898	0.00282718	25.6999	27.9113	30.6097	0.00203441	0.00276184	0.00363462
RGU296244N0927894E	RGS296244N0927894E	Active	Central	0.105971	15.4657	16.9994	18.8708	0.00059001	0.00081065	0.00107987	12.0657	13.5994	15.4708	0.000460301	0.000648514	0.000885307	18.8657	20.3994	22.2708	0.000719719	0.000972787	0.00127443
RGU296430N0927977E	RGS296430N0927977E	Transitional	Central	0.0744452	15.2931	16.8097	18.6603	0.00040986	0.000563132	0.00075015	11.8931	13.4097	15.2603	0.000318739	0.000449231	0.000613469	18.6931	20.2097	22.0603	0.000500981	0.000677033	0.000886832
RGU296537N0927923E	RGS296537N0927923E	Transitional	Central	0.0275631	13.0691	14.3652	15.9466	0.000129681	0.000178177	0.00023735	9.66912	10.9652	12.5466	9.5944e-05	0.000136005	0.000186744	16.4691	17.7652	19.3466	0.000163419	0.000220349	0.000287956
RGU296147N0927968E	RGS296147N0927968E	Active	Central	0.159831	13.7252	15.0863	16.7471	0.000789736	0.00108507	0.00144542	10.3252	11.6863	13.3471	0.000594103	0.000840526	0.00115197	17.1252	18.4863	20.1471	0.000985369	0.00132961	0.00173887
RGU296183N0927962E	RGS296183N0927962E	Active	Central	0.172028	18.1586	19.9594	22.1566	0.00112456	0.0015451	0.00205824	14.7586	16.5594	18.7566	0.000914	0.0012819	0.0017424	21.5586	23.3594	25.5566	0.00133512	0.00180831	0.00237408
RGU297426N0928075E	RGS297426N0928075E	Active	Central	0.0574799	24.3595	26.7752	29.7227	0.000504065	0.000692566	0.000922569	20.9595	23.3752	26.3227	0.00043371	0.000604621	0.000817036	27.7595	30.1752	33.1227	0.00057442	0.00078051	0.0010281
RGU297666N0928082E	RGS297666N0928082E	Active	Central	0.0339997	21.309	23.4222	26.0007	0.00026082	0.000358356	0.000477368	17.909	20.0222	22.6007	0.000219204	0.000306337	0.000414944	24.709	26.8222	29.4007	0.000302436	0.000410376	0.000539791
RGU297837N0928201E	RGS297837N0928201E	Transitional	Central	0.281582	23.914	26.2856	29.1792	0.00242415	0.00333069	0.00443683	20.514	22.8856	25.7792	0.0020795	0.00289987	0.00391984	27.314	29.6856	32.5792	0.00276881	0.00376151	0.00495381
RGU297807N0928173E	RGS297807N0928173E	Transitional	Central	0.1153	16.1904	17.796	19.7551	0.000672035	0.00092335	0.00123	12.7904	14.396	16.3551	0.000530908	0.000746941	0.00101831	19.5904	21.196	23.1551	0.000813163	0.00109976	0.00144169
RGU297923N0928085E	RGS297923N0928085E	Transitional	Central	0.163138	18.0928	19.887	22.0763	0.00106258	0.00145995	0.0019448	14.6928	16.487	18.6763	0.000862904	0.00121035	0.00164528	21.4928	23.287	25.4763	0.00126227	0.00170955	0.00224433
RGU297794N0928026E	RGS297794N0928026E	Transitional	Central	0.0267865	11.4035	12.5344	13.9143	0.000109966	0.000151089	0.000201266	8.00353	9.13441	10.5143	7.7179e-05	0.000110105	0.000152086	14.8035	15.9344	17.3143	0.000142752	0.000192072	0.000250445
RGU298809N0928081E	RGS298809N0928081E	Transitional	Central	0.148295	18.811	20.6765	22.9527	0.00100425	0.00137979	0.00183803	15.411	17.2765	19.5527	0.000822733	0.0011529	0.00156576	22.211	24.0765	26.3527	0.00118576	0.00160669	0.0021103
RGU298670N0928094E	RGS298670N0928094E	Transitional	Central	0.0167311	11.02	12.1128	13.4462	6.63753e-05	9.11971e-05	0.000121484	7.61996	8.7128	10.0462	4.58965e-05	6.55985e-05	9.07657e-05	14.42	15.5128	16.8462	8.68542e-05	0.000116796	0.000152202
RGU298564N0928130E	RGS298564N0928130E	Transitional	Central	0.216997	19.8574	21.8266	24.2294	0.00155124	0.00213134	0.00283917	16.4574	18.4266	20.8294	0.00128563	0.00179934	0.00244076	23.2574	25.2266	27.6294	0.00181684	0.00246335	0.00323757
RGU298594N0928158E	RGS298594N0928158E	Transitional	Central	0.10446	19.983	21.9647	24.3828	0.000751475	0.0010325	0.00137539	16.583	18.5647	20.9828	0.000623616	0.000872673	0.0011836	23.383	25.3647	27.7828	0.000879334	0.00119232	0.00156718
RGU298465N0928141E	RGS298465N0928141E	Transitional	Central	0.0744018	11.5614	12.708	14.1069	0.000309669	0.000425473	0.000566774	8.16143	9.30797	10.7069	0.000218601	0.000311638	0.000430172	14.9614	16.108	17.5069	0.000400737	0.000539308	0.000703376
RGU298369N0928207E	RGS296253N0927825E	Transitional	Central	0.015409	13.6693	15.0249	16.6789	7.58268e-05	0.000104183	0.000138783	10.2693	11.6249	13.2789	5.69663e-05	8.06074e-05	0.000110492	17.0693	18.4249	20.0789	9.46874e-05	0.000127759	0.000167074
RGU298216N0928214E	RGS298216N0928214E	Transitional	Central	0.0131277	15.3967	16.9235	18.7866	7.27643e-05	9.99753e-05	0.000133177	11.9967	13.5235	15.3866	5.6696e-05	7.98899e-05	0.000109075	18.7967	20.3235	22.1866	8.88326e-05	0.000120061	0.00015728
RGU298207N0928207E	RGS298207N0928207E	Active	Central	0.0569705	16.101	17.6977	19.646	0.000330221	0.000453711	0.00060439	12.701	14.2977	16.246	0.000260489	0.000366546	0.000499792	19.501	21.0977	23.046	0.000399953	0.000540876	0.000708988
RGU298185N0928181E	RGS298185N0928181E	Active	Central	0.0629514	19.1829	21.0853	23.4064	0.000434732	0.000597305	0.000795673	15.7829	17.6853	20.0064	0.00035768	0.00050099	0.000680094	22.5829	24.4853	26.8064	0.000511785	0.000693621	0.000911251
RGU296333N0928032E	RGS296333N0928032E	Transitional	Central	0.0330753	13.6069	14.9563	16.6028	0.000162019	0.000222608	0.000296537	10.2069	11.5563	13.2028	0.000121535	0.000172003	0.00023581	17.0069	18.3563	20.0028	0.000202503	0.000273213	0.000357263
RGU296406N0928292E	RGS296406N0928292E	Active	Central	0.326334	18.9182	20.7943	23.0834	0.00222251	0.00305364	0.00406776	15.5182	17.3943	19.6834	0.00182308	0.00255435	0.00346862	22.3182	24.1943	26.4834	0.00262194	0.00355293	0.00466691
RGU296475N0928316E	RGS296475N0928316E	Active	Central	0.0818021	18.1214	19.9185	22.1112	0.000533652	0.000733217	0.00097672	14.7214	16.5185	18.7112	0.000433526	0.00060806	0.000826532	21.5214	23.3185	25.5112	0.000633777	0.000858374	0.00112691
RGU296526N0928319E	RGS296526N0928319E	Active	Central	0.0731194	18.2396	20.0484	22.2555	0.000480121	0.000659668	0.000878746	14.8396	16.6484	18.8555	0.000390623	0.000547795	0.000744498	21.6396	23.4484	25.6555	0.000569619	0.00077154	0.00101299
RGU296579N0928265E	RGS296579N0928265E	Active	Central	0.0743332	17.6606	19.412	21.549	0.000472598	0.000649331	0.000864976	14.2606	16.012	18.149	0.000381614	0.000535601	0.0007285	21.0606	22.812	24.949	0.000563582	0.000763061	0.00100145
RGU296594N0928185E	RGS296594N0928185E	Active	Central	0.0722035	14.9826	16.4684	18.2813	0.000389445	0.000535083	0.000712786	11.5826	13.0684	14.8813	0.000301068	0.000424611	0.00058022	18.3826	19.8684	21.6813	0.000477822	0.000645554	0.000845351
RGU296134N0928067E	RGS296134N0928067E	Active	Central	0.179514	13.9415	15.3241	17.0111	0.000900971	0.0012379	0.00164901	10.5415	11.9241	13.6111	0.000681246	0.000963243	0.00131942	17.3415	18.7241	20.4111	0.0011207	0.00151255	0.0019786
RGU296110N0928086E	RGS296110N0928086E	Active	Central	0.0689297	17.9658	19.7475	21.9214	0.000445816	0.000612535	0.000815959	14.5658	16.3475	18.5214	0.000361447	0.000507072	0.000689404	21.3658	23.1475	25.3214	0.000530186	0.000717997	0.000942514
RGU296154N0928143E	RGS296154N0928143E	Active	Central	0.116049	14.7852	16.2514	18.0404	0.000617689	0.000848681	0.00113053	11.3852	12.8514	14.6404	0.000475645	0.000671126	0.000917465	18.1852	19.6514	21.4404	0.000759733	0.00102624	0.0013436
RGU296172N0928065E	RGS296172N0928065E	Active	Central	0.0966352	19.3801	21.302	23.6471	0.000674207	0.000926335	0.00123397	15.9801	17.902	20.2471	0.000555926	0.000778483	0.00105655	22.7801	24.702	27.0471	0.000792489	0.00107419	0.0014114
RGU296215N0928159E	RGS296215N0928159E	Active	Central	0.0440899	14.8107	16.2795	18.0716	0.000235081	0.000322992	0.000430259	11.4107	12.8795	14.6716	0.000181115	0.000255534	0.00034931	18.2107	19.6795	21.4716	0.000289047	0.000390449	0.000511208
RGU296413N0928228E	RGS296413N0928228E	Active	Central	0.145712	11.8924	13.0717	14.5108	0.000623829	0.000857117	0.00114177	8.49238	9.67174	11.1108	0.000445478	0.000634178	0.000874242	15.2924	16.4717	17.9108	0.000802181	0.00108006	0.0014093
RGU296773N0928325E	RGS296773N0928325E	Active	Central	0.0713541	11.5686	12.7158	14.1157	0.000297168	0.000408298	0.000543895	8.1686	9.31585	10.7157	0.000209831	0.000299126	0.000412889	14.9686	16.1158	17.5157	0.000384506	0.00051747	0.000674901
RGU296982N0928125E	RGS296982N0928125E	Active	Central	0.0834835	15.705	17.2625	19.1629	0.000472	0.00064851	0.000863883	12.305	13.8625	15.7629	0.000369817	0.000520781	0.000710607	19.105	20.6625	22.5629	0.000574184	0.00077624	0.00101716
RGU296720N0928223E	RGS296720N0928223E	Active	Central	0.0594529	14.7427	16.2047	17.9886	0.000315538	0.000433537	0.000577517	11.3427	12.8047	14.5886	0.000242768	0.000342574	0.000468361	18.1427	19.6047	21.3886	0.000388309	0.0005245	0.000686672
RGU296771N0928214E	RGS296771N0928214E	Active	Central	0.0676506	14.8161	16.2854	18.0781	0.000360834	0.000495771	0.000660419	11.4161	12.8854	14.6781	0.000278029	0.000392266	0.000536212	18.2161	19.6854	21.4781	0.000443638	0.000599277	0.000784625
RGU297052N0928325E	RGS297052N0928325E	Active	Central	0.0228578	13.7283	15.0897	16.7509	0.000112968	0.000155213	0.00020676	10.3283	11.6897	13.3509	8.49898e-05	0.000120241	0.000164793	17.1283	18.4897	20.1509	0.000140946	0.000190186	0.000248727
RGU297040N0928326E	RGS297040N0928326E	Active	Central	0.060813	20.6431	22.6903	25.1882	0.000451933	0.000620939	0.000827155	17.2431	19.2903	21.7882	0.000377498	0.000527895	0.000715502	24.0431	26.0903	28.5882	0.000526368	0.000713983	0.000938807
RGU297095N0928282E	RGS297095N0928282E	Active	Central	0.0267266	12.5793	13.8268	15.349	0.000121033	0.000166295	0.000221522	9.17935	10.4268	11.949	8.83197e-05	0.000125403	0.000172452	15.9793	17.2268	18.749	0.000153746	0.000207186	0.000270592
RGU297058N0928206E	RGS297058N0928206E	Active	Central	0.149431	26.4749	29.1004	32.304	0.00142422	0.00195683	0.0026067	23.0749	25.7004	28.904	0.00124132	0.0017282	0.00233234	29.8749	32.5004	35.704	0.00160713	0.00218546	0.00288105
RGU297160N0928270E	RGS297160N0928270E	Active	Central	0.0332194	20.0649	22.0547	24.4826	0.000239955	0.000329689	0.00043918	16.6649	18.6547	21.0826	0.000199295	0.000278863	0.000378189	23.4649	25.4547	27.8826	0.000280616	0.000380515	0.000500171
RGU297167N0928181E	RGS297167N0928181E	Transitional	Central	0.0570976	20.4658	22.4953	24.9718	0.000420677	0.000577993	0.000769947	17.0658	19.0953	21.5718	0.000350789	0.000490634	0.000665116	23.8658	25.8953	28.3718	0.000490564	0.000665353	0.000874778
RGU297205N0928239E	RGS297205N0928239E	Transitional	Central	0.137581	20.0877	22.0797	24.5104	0.000994928	0.00136699	0.00182098	16.6877	18.6797	21.1104	0.000826528	0.00115649	0.00156838	23.4877	25.4797	27.9104	0.00116333	0.00157749	0.00207357
RGU297298N0928168E	RGS297298N0928168E	Transitional	Central	0.358577	12.5678	13.8141	15.3348	0.00162234	0.00222903	0.0029693	9.16775	10.4141	11.9348	0.00118344	0.00168041	0.00231096	15.9678	17.2141	18.7348	0.00206124	0.00277766	0.00362765
RGU297429N0928228E	RGS297429N0928228E	Transitional	Central	0.146251	17.0784	18.7721	20.8386	0.000899188	0.00123545	0.00164575	13.6784	15.3721	17.4386	0.000720176	0.00101168	0.00137723	20.4784	22.1721	24.2386	0.0010782	0.00145921	0.00191426
RGU296610N0928462E	RGS296610N0928462E	Active	Central	0.4329	16.4576	18.0897	20.0812	0.00256482	0.00352397	0.00469429	13.0576	14.6897	16.6812	0.00203495	0.00286163	0.00389949	19.8576	21.4897	23.4812	0.00309469	0.00418631	0.0054891
RGU296607N0928494E	RGS296607N0928494E	Active	Central	0.0341875	15.7057	17.2632	19.1636	0.000193298	0.000265584	0.000353785	12.3057	13.8632	15.7636	0.000151452	0.000213277	0.000291017	19.1057	20.6632	22.5636	0.000235143	0.000317891	0.000416553
RGU296091N0928679E	RGS296091N0928679E	Active	Central	0.280548	16.2334	17.8433	19.8076	0.00163953	0.00225266	0.00300077	12.8334	14.4433	16.4076	0.00129614	0.00182342	0.00248568	19.6334	21.2433	23.2076	0.00198292	0.00268189	0.00351586
RGU296287N0928736E	RGS296287N0928736E	Active	Central	0.051661	14.0458	15.4387	17.1383	0.000261223	0.00035891	0.000478105	10.6458	12.0387	13.7383	0.00019799	0.000279868	0.000383255	17.4458	18.8387	20.5383	0.000324456	0.000437951	0.000572954
RGU296174N0928626E	RGS296174N0928626E	Active	Central	0.133191	13.2687	14.5846	16.1901	0.000636217	0.000874137	0.00116444	9.86872	11.1846	12.7901	0.000473191	0.000670355	0.000919903	16.6687	17.9846	19.5901	0.000799242	0.00107792	0.00140898
RGU296197N0928560E	RGS296197N0928560E	Active	Central	0.0422464	12.2978	13.5173	15.0054	0.000187033	0.000256976	0.000342319	8.89777	10.1173	11.6054	0.000135323	0.000192339	0.000264754	15.6978	16.9173	18.4054	0.000238743	0.000321613	0.000419883
RGU296251N0928644E	RGS296251N0928644E	Active	Central	0.132409	16.4363	18.0662	20.0551	0.000783474	0.00107646	0.00143396	13.0363	14.6662	16.6551	0.000621405	0.000873876	0.00119086	19.8363	21.4662	23.4551	0.000945543	0.00127905	0.00167706
RGU296303N0928721E	RGS296303N0928721E	Active	Central	0.0676328	12.4731	13.7101	15.2194	0.000303694	0.000417263	0.000555838	9.07313	10.3101	11.8194	0.000220911	0.000313785	0.000431664	15.8731	17.1101	18.6194	0.000386476	0.000520741	0.000680011
RGU296310N0928813E	RGS296310N0928813E	Active	Central	0.0618796	19.3191	21.2349	23.5726	0.000430364	0.000591303	0.000787677	15.9191	17.8349	20.1726	0.000354623	0.000496627	0.000674066	22.7191	24.6349	26.9726	0.000506105	0.000685979	0.000901288
RGU296425N0928839E	RGS296425N0928839E	Active	Central	0.0411975	14.9825	16.4683	18.2813	0.000222207	0.000305304	0.000406697	11.5825	13.0683	14.8813	0.000171782	0.000242272	0.000331058	18.3825	19.8683	21.6813	0.000272633	0.000368337	0.000482336
RGU296417N0928819E	RGS296417N0928819E	Active	Central	0.0756837	13.965	15.3499	17.0397	0.000380492	0.000522782	0.000696399	10.565	11.9499	13.6397	0.000287855	0.000406986	0.000557444	17.365	18.7499	20.4397	0.000473129	0.000638578	0.000835354
RGU296422N0928773E	RGS296422N0928773E	Active	Central	0.0854938	13.9933	15.381	17.0743	0.000430683	0.000591742	0.000788262	10.5933	11.981	13.6743	0.000326039	0.000460937	0.000631295	17.3933	18.781	20.4743	0.000535328	0.000722548	0.000945228
RGU296440N0928712E	RGS296440N0928712E	Active	Central	0.0870336	15.8305	17.4004	19.316	0.000496004	0.00068149	0.000907815	12.4305	14.0004	15.916	0.000389475	0.000548329	0.000748021	19.2305	20.8004	22.716	0.000602533	0.000814651	0.00106761
RGU296482N0928836E	RGS296482N0928836E	Active	Central	0.115857	18.9501	20.8293	23.1224	0.000790382	0.00108595	0.0014466	15.5501	17.4293	19.7224	0.000648572	0.000908692	0.00123389	22.3501	24.2293	26.5224	0.000932191	0.00126322	0.00165932
RGU296527N0928849E	RGS296527N0928849E	Active	Central	0.0878001	22.775	25.0336	27.7895	0.000719874	0.000989079	0.00131755	19.375	21.6336	24.3895	0.000612406	0.000854745	0.00115635	26.175	28.4336	31.1895	0.000827341	0.00112341	0.00147876
RGU296527N0928742E	RGS296527N0928742E	Transitional	Central	0.125873	15.6782	17.233	19.1301	0.000710447	0.000976127	0.0013003	12.2782	13.833	15.7301	0.000556379	0.000783541	0.0010692	19.0782	20.633	22.5301	0.000864516	0.00116871	0.00153141
RGU296537N0928765E	RGS296537N0928765E	Active	Central	0.139703	19.8259	21.7921	24.1911	0.000997104	0.00136998	0.00182496	16.4259	18.3921	20.7911	0.000826108	0.00115624	0.00156846	23.2259	25.1921	27.5911	0.0011681	0.00158373	0.00208145
RGU296613N0928812E	RGS296613N0928812E	Active	Central	0.0997111	13.5182	14.8588	16.4945	0.000485249	0.000666714	0.000888131	10.1182	11.4588	13.0945	0.000363203	0.000514156	0.000705062	16.9182	18.2588	19.8945	0.000607296	0.000819271	0.0010712
RGU296790N0928480E	RGS296790N0928480E	Active	Central	0.0144214	10.4516	11.488	12.7527	5.42614e-05	7.45531e-05	9.93125e-05	7.05156	8.08803	9.3527	3.66096e-05	5.24884e-05	7.28347e-05	13.8516	14.888	16.1527	7.19133e-05	9.66179e-05	0.00012579
RGU296732N0928394E	RGS296732N0928394E	Active	Central	0.0520942	13.342	14.6651	16.2795	0.000250214	0.000343784	0.000457956	9.94197	11.2651	12.8795	0.000186451	0.00026408	0.000362312	16.742	18.0651	19.6795	0.000313977	0.000423489	0.000553601
RGU296741N0928403E	RGS296741N0928403E	Transitional	Central	0.461801	12.9337	14.2163	15.7813	0.0021502	0.00295429	0.00393542	9.53367	10.8163	12.3813	0.00158496	0.00224774	0.00308755	16.3337	17.6163	19.1813	0.00271544	0.00366085	0.00478329
RGU296767N0928393E	RGS296767N0928393E	Active	Central	0.057922	10.9541	12.0405	13.3659	0.000228415	0.000313833	0.000418058	7.55415	8.64046	9.96595	0.000157518	0.000225213	0.000311714	14.3541	15.4405	16.7659	0.000299311	0.000402454	0.000524403
RGU297334N0928518E	RGS297334N0928518E	Active	Central	0.0372311	11.7189	12.881	14.2991	0.000157071	0.000215809	0.00028748	8.31889	9.48104	10.8991	0.0001115	0.000158845	0.000219123	15.1189	16.281	17.6991	0.000202641	0.000272772	0.000355836
RGU297084N0928872E	RGS297084N0928872E	Active	Central	0.0426132	16.18	17.7846	19.7424	0.000248213	0.000341036	0.000454295	12.78	14.3846	16.3424	0.000196055	0.000275837	0.000376057	19.58	21.1846	23.1424	0.000300372	0.000406234	0.000532533
RGU297116N0928638E	RGS297116N0928638E	Active	Central	0.0134575	12.7482	14.0124	15.5549	6.17611e-05	8.48574e-05	0.000113039	9.34815	10.6124	12.1549	4.52891e-05	6.42674e-05	8.83308e-05	16.1482	17.4124	18.9549	7.82332e-05	0.000105447	0.000137747
RGU297082N0928644E	RGS297082N0928644E	Active	Central	0.179279	14.8885	16.365	18.1666	0.000960913	0.00132026	0.00175872	11.4885	12.965	14.7666	0.000741475	0.00104596	0.00142956	18.2885	19.765	21.5666	0.00118035	0.00159455	0.00208787
RGU297044N0928639E	RGS297404N0928435E	Active	Central	0.125523	18.2279	20.0356	22.2412	0.000823691	0.00113172	0.00150757	14.8279	16.6356	18.8412	0.00067005	0.000939669	0.00127711	21.6279	23.4356	25.6412	0.000977332	0.00132377	0.00173803
RGU297192N0928650E	RGS297404N0928435E	Active	Central	0.029955	28.4914	31.3169	34.7645	0.000307246	0.000422145	0.00056234	25.0914	27.9169	31.3645	0.000270581	0.000376313	0.000507343	31.8914	34.7169	38.1645	0.000343911	0.000467976	0.000617338
RGU297414N0928450E	RGS297404N0928435E	Active	Central	0.0472949	21.0204	23.105	25.6486	0.000357898	0.000491738	0.000655045	17.6204	19.705	22.2486	0.000300009	0.000419376	0.000568212	24.4204	26.505	29.0486	0.000415787	0.000564099	0.000741879
RGU297364N0928366E	RGS297364N0928366E	Active	Central	0.0286636	19.6283	21.5748	23.9499	0.000202542	0.000278285	0.000370705	16.2283	18.1748	20.5499	0.000167458	0.00023443	0.000318078	23.0283	24.9748	27.3499	0.000237627	0.000322141	0.000423331
RGU297381N0928382E	RGS297381N0928382E	Active	Central	0.0981347	28.7003	31.5465	35.0193	0.00101394	0.00139311	0.00185577	25.3003	28.1465	31.6193	0.000893821	0.00124297	0.00167559	32.1003	34.9465	38.4193	0.00113405	0.00154326	0.00203594
RGU297407N0928597E	RGS297407N0928597E	Active	Central	0.0159584	16.3996	18.026	20.0104	9.42164e-05	0.00012945	0.00017244	12.9996	14.626	16.6104	7.46833e-05	0.000105033	0.000143141	19.7996	21.426	23.4104	0.00011375	0.000153866	0.00020174
RGU297402N0928638E	RGS297402N0928638E	Active	Central	0.0283129	16.2744	17.8883	19.8575	0.000165879	0.000227911	0.000303601	12.8744	14.4883	16.4575	0.000131224	0.000184592	0.000251619	19.6744	21.2883	23.2575	0.000200534	0.00027123	0.000355584
RGU297371N0928678E	RGS297371N0928678E	Active	Central	0.0138402	12.3614	13.5873	15.0831	6.15905e-05	8.4623e-05	0.000112727	8.96142	10.1873	11.6831	4.46501e-05	6.34475e-05	8.73159e-05	15.7614	16.9873	18.4831	7.85309e-05	0.000105799	0.000138137
RGU297371N0928690E	RGS297533N0928556E	Active	Central	0.0347364	24.9491	27.4233	30.4422	0.000311991	0.000428664	0.000571025	21.5491	24.0233	27.0422	0.000269474	0.000375517	0.000507249	28.3491	30.8233	33.8422	0.000354509	0.00048181	0.000634801
RGU297465N0928659E	RGS297533N0928556E	Active	Central	0.215288	22.2533	24.4601	27.1529	0.00172471	0.00236969	0.00315667	18.8533	21.0601	23.7529	0.0014612	0.00204029	0.0027614	25.6533	27.8601	30.5529	0.00198822	0.00269908	0.00355193
RGU297480N0928633E	RGS297480N0928633E	Active	Central	0.145314	14.5368	15.9784	17.7374	0.000760465	0.00104485	0.00139185	11.1368	12.5784	14.3374	0.0005826	0.000822519	0.00112505	17.9368	19.3784	21.1374	0.00093833	0.00126718	0.00165864
RGU297532N0928558E	RGS297532N0928558E	Active	Central	0.0483223	12.0256	13.2181	14.6732	0.000209197	0.000287428	0.000382884	8.62555	9.81811	11.2732	0.00015005	0.000213495	0.000294165	15.4256	16.6181	18.0732	0.000268343	0.000361362	0.000471604
RGU297584N0928537E	RGS297584N0928537E	Active	Central	0.269035	10.6512	11.7075	12.9963	0.0010316	0.00141738	0.00188809	7.2512	8.30747	9.5963	0.000702299	0.00100575	0.00139414	14.0512	15.1075	16.3963	0.0013609	0.001829	0.00238204
RGU297527N0928734E	RGS297527N0928734E	Active	Central	0.148698	17.5451	19.2851	21.4081	0.000939215	0.00129045	0.00171901	14.1451	15.8851	18.0081	0.000757209	0.00106294	0.001446	20.9451	22.6851	24.8081	0.00112122	0.00151795	0.00199202
RGU297747N0928782E	RGS297747N0928782E	Active	Central	0.0790495	22.6952	24.9459	27.6921	0.000645857	0.000887383	0.00118209	19.2952	21.5459	24.2921	0.000549101	0.000766437	0.00103695	26.0952	28.3459	31.0921	0.000742614	0.00100833	0.00132722
RGU297907N0928695E	RGS297907N0928695E	Active	Central	0.0218141	18.0572	19.8479	22.0329	0.000141805	0.000194835	0.00025954	14.6572	16.4479	18.6329	0.000115104	0.000161459	0.000219489	21.4572	23.2479	25.4329	0.000168505	0.00022821	0.000299591
RGU297950N0928619E	RGS297950N0928619E	Active	Central	0.0706362	21.2564	23.3644	25.9365	0.00054053	0.000742667	0.000989309	17.8564	19.9644	22.5365	0.000454071	0.000634593	0.000859621	24.6564	26.7644	29.3365	0.000626988	0.00085074	0.001119
RGU297433N0928938E	RGS297433N0928938E	Transitional	Central	0.0437736	13.0093	14.2994	15.8736	0.000205007	0.000281672	0.000375216	9.60931	10.8994	12.4736	0.000151428	0.000214698	0.000294848	16.4093	17.6994	19.2736	0.000258586	0.000348645	0.000455584
RGU297593N0928970E	RGS297593N0928970E	Active	Central	0.164286	21.8407	24.0066	26.6494	0.00129172	0.00177478	0.00236419	18.4407	20.6066	23.2494	0.00109064	0.00152342	0.00206256	25.2407	27.4066	30.0494	0.00149281	0.00202613	0.00266581
RGU297596N0928934E	RGS297596N0928934E	Active	Central	0.0434184	23.3142	25.6262	28.4473	0.000364415	0.000500693	0.000666974	19.9142	22.2262	25.0473	0.000311271	0.000434262	0.000587258	26.7142	29.0262	31.8473	0.00041756	0.000567123	0.000746691
RGU297566N0928904E	RGS297566N0928904E	Active	Central	0.0231156	11.792	12.9614	14.3883	9.81285e-05	0.000134825	0.000179601	8.39201	9.56142	10.9883	6.98351e-05	9.94579e-05	0.00013716	15.192	16.3614	17.7883	0.000126422	0.000170192	0.000222041
RGU297537N0928862E	RGS297537N0928862E	Transitional	Central	0.214535	10.9392	12.0241	13.3478	0.000844867	0.00116081	0.00154632	7.53924	8.62408	9.94776	0.000582276	0.000832576	0.00115244	14.3392	15.4241	16.7478	0.00110746	0.00148905	0.00194021
RGU298191N0928879E	RGS298191N0928879E	Active	Central	0.0292015	13.4683	14.8039	16.4336	0.000141586	0.000194533	0.000259138	10.0683	11.4039	13.0336	0.000105843	0.000149855	0.000205524	16.8683	18.2039	19.8336	0.000177328	0.000239212	0.000312752
RGU297733N0928943E	RGS297733N0928943E	Active	Central	0.038931	10.6798	11.7389	13.0312	0.000149679	0.000205653	0.000273951	7.27976	8.33887	9.63115	0.000102027	0.000146088	0.000202473	14.0798	15.1389	16.4312	0.00019733	0.000265217	0.000345428
RGU3018N0929196E	RGS300018N0929196E	Active	Central	0.0653534	16.4312	18.0607	20.0489	0.000386581	0.000531147	0.000707543	13.0312	14.6607	16.6489	0.000306589	0.000431157	0.000587554	19.8312	21.4607	23.4489	0.000466574	0.000631138	0.000827532
RGU299899N0929283E	RGS299899N0929283E	Active	Central	0.0134688	13.53	14.8718	16.509	6.56042e-05	9.01376e-05	0.000120073	10.13	11.4718	13.109	4.91183e-05	6.95303e-05	9.53438e-05	16.93	18.2718	19.909	8.209e-05	0.000110745	0.000144801
RGU299904N0929346E	RGS299904N0929346E	Active	Central	0.0262569	11.6591	12.8153	14.2261	0.000110207	0.000151421	0.000201708	8.25912	9.41534	10.8261	7.80691e-05	0.000111248	0.000153501	15.0591	16.2153	17.6261	0.000142346	0.000191594	0.000249916
RGU299863N0929329E	RGS299863N0929329E	Active	Central	0.0222035	15.2561	16.769	18.6151	0.000121946	0.00016755	0.000223193	11.8561	13.369	15.2151	9.47692e-05	0.000133578	0.000182428	18.6561	20.169	22.0151	0.000149123	0.000201521	0.000263959
RGU299849N0929307E	RGS299849N0929307E	Active	Central	0.0135743	17.3923	19.1171	21.2216	8.49919e-05	0.000116776	0.000155557	13.9923	15.7171	17.8216	6.83769e-05	9.60069e-05	0.000130635	20.7923	22.5171	24.6216	0.000101607	0.000137544	0.00018048
RGU299835N0929270E	RGS299835N0929270E	Active	Central	0.0334967	22.404	24.6258	27.3368	0.000270166	0.000371198	0.000494474	19.004	21.2258	23.9368	0.000229166	0.000319948	0.000432974	25.804	28.0258	30.7368	0.000311166	0.000422448	0.000555974
RGU299830N0929241E	RGS299830N0929241E	Transitional	Central	0.0425051	18.4741	20.3062	22.5416	0.000282688	0.000388403	0.000517392	15.0741	16.9062	19.1416	0.000230662	0.00032337	0.000439353	21.8741	23.7062	25.9416	0.000334714	0.000453435	0.000595432
RGU299866N0929199E	RGS299866N0929199E	Active	Central	0.0899709	16.2633	17.8761	19.844	0.000526761	0.000723749	0.000964109	12.8633	14.4761	16.444	0.000416637	0.000586094	0.000798922	19.6633	21.2761	23.244	0.000636885	0.000861404	0.0011293
RGU298833N0929072E	RGS298833N0929072E	Active	Central	0.0783614	12.906	14.1859	15.7476	0.00036408	0.000500232	0.000666361	9.50602	10.7859	12.3476	0.000268166	0.000380339	0.000522489	16.306	17.5859	19.1476	0.000459994	0.000620125	0.000810232
RGU298689N0929289E	RGS298689N0929289E	Active	Central	0.0756921	13.5116	14.8516	16.4865	0.000368181	0.000505866	0.000673866	10.1116	11.4516	13.0865	0.000275534	0.000390057	0.000534895	16.9116	18.2516	19.8865	0.000460828	0.000621675	0.000812837
RGU298704N0929390E	RGS298704N0929390E	Transitional	Central	0.175428	16.1888	17.7942	19.7531	0.00102239	0.00140472	0.00187124	12.7888	14.3942	16.3531	0.000807666	0.00113632	0.00154915	19.5888	21.1942	23.1531	0.00123711	0.00167313	0.00219332
RGU298649N0929306E	RGS298649N0929306E	Active	Central	0.0761149	12.5785	13.8259	15.348	0.000344669	0.000473562	0.000630834	9.17854	10.4259	11.948	0.000251505	0.000357106	0.000491087	15.9785	17.2259	18.748	0.000437834	0.000590018	0.000770581
RGU298733N0929244E	RGS298733N0929244E	Active	Central	0.0201444	13.35	14.6739	16.2892	9.68139e-05	0.000133019	0.000177194	9.94995	11.2739	12.8892	7.21571e-05	0.000102198	0.000140209	16.75	18.0739	19.6892	0.000121471	0.00016384	0.00021418
RGU298539N0929330E	RGS298539N0929330E	Active	Central	0.0301935	17.0756	18.769	20.8352	0.000185606	0.000255015	0.000339706	13.6756	15.369	17.4352	0.000148649	0.000208819	0.000284271	20.4756	22.169	24.2352	0.000222563	0.000301211	0.000395142
RGU298524N0929334E	RGS298524N0929334E	Active	Central	0.0747833	14.9766	16.4618	18.274	0.0004032	0.000553981	0.00073796	11.5766	13.0618	14.874	0.000311665	0.000439563	0.000600658	18.3766	19.8618	21.674	0.000494735	0.0006684	0.000875263
RGU298570N0929334E	RGS298570N0929334E	Transitional	Central	0.0662017	18.679	20.5314	22.7916	0.00044517	0.000611646	0.000814775	15.279	17.1314	19.3916	0.000364139	0.000510357	0.000693229	22.079	23.9314	26.1916	0.000526201	0.000712934	0.000936322
RGU298587N0929312E	RGS298587N0929312E	Active	Central	0.0724846	20.2321	22.2385	24.6867	0.000527947	0.000725378	0.000966279	16.8321	18.8385	21.2867	0.000439226	0.000614477	0.000833197	23.6321	25.6385	28.0867	0.000616668	0.00083628	0.00109936
RGU298597N0929355E	RGS298597N0929355E	Active	Central	0.212557	17.4511	19.1817	21.2934	0.00133537	0.00183474	0.00244407	14.0511	15.7817	17.8934	0.0010752	0.00150953	0.00205381	20.8511	22.5817	24.6934	0.00159554	0.00215996	0.00283432
RGU298790N0929318E	RGS298790N0929318E	Active	Central	0.0124662	18.7438	20.6026	22.8706	8.41192e-05	0.000115577	0.00015396	15.3438	17.2026	19.4706	6.88605e-05	9.65032e-05	0.000131072	22.1438	24.0026	26.2706	9.93779e-05	0.00013465	0.000176848
RGU298576N0929041E	RGS298576N0929041E	Active	Central	0.151421	15.2869	16.8029	18.6526	0.000833311	0.00114494	0.00152517	11.8869	13.4029	15.2526	0.000647972	0.000913263	0.00124717	18.6869	20.2029	22.0526	0.00101865	0.00137661	0.00180318
RGU298604N0928975E	RGS298604N0928975E	Active	Central	0.111211	22.2965	24.5076	27.2056	0.000892661	0.00122648	0.0016338	18.8965	21.1076	23.8056	0.000756539	0.00105633	0.00142962	25.6965	27.9076	30.6056	0.00102878	0.00139664	0.00183798
RGU298442N0929099E	RGS298442N0929099E	Active	Central	0.045785	12.943	14.2266	15.7927	0.000213335	0.000293114	0.000390458	9.54301	10.8266	12.3927	0.000157294	0.000223062	0.000306396	16.343	17.6266	19.1927	0.000269376	0.000363165	0.000474519
RGU298438N0929216E	RGS298438N0929216E	Transitional	Central	0.0833567	26.8	29.4578	32.7007	0.000804227	0.00110498	0.00147194	23.4	26.0578	29.3007	0.000702198	0.00097744	0.0013189	30.2	32.8578	36.1007	0.000906255	0.00123251	0.00162499
RGU298381N0929341E	RGS298381N0929341E	Active	Central	0.0529889	12.5594	13.8049	15.3246	0.000239583	0.000329178	0.000438499	9.15941	10.4049	11.9246	0.000174725	0.000248105	0.000341212	15.9594	17.2049	18.7246	0.000304442	0.000410251	0.000535787
RGU298376N0929301E	RGS298376N0929301E	Active	Central	0.047283	12.3302	13.5529	15.0449	0.000209883	0.000288371	0.00038414	8.93017	10.1529	11.6449	0.000152008	0.000216028	0.000297328	15.7302	16.9529	18.4449	0.000267757	0.000360714	0.000470951
RGU298378N0929256E	RGS298378N0929256E	Active	Central	0.0652516	11.5733	12.7211	14.1215	0.000271864	0.000373531	0.000497582	8.17334	9.32106	10.7215	0.000191996	0.000273696	0.00037778	14.9733	16.1211	17.5215	0.000351732	0.000473366	0.000617384
RGU298361N0929195E	RGS298361N0929195E	Transitional	Central	0.0184046	9.44622	10.383	11.526	6.25875e-05	8.59928e-05	0.000114551	6.04622	6.98299	8.12601	4.00602e-05	5.78337e-05	8.07604e-05	12.8462	13.783	14.926	8.51148e-05	0.000114152	0.000148342
RGU297746N0929249E	RGS297746N0929249E	Transitional	Central	0.0608048	10.7436	11.8091	13.1091	0.000235175	0.000323122	0.000430432	7.34365	8.40908	9.7091	0.00016075	0.000230091	0.000318794	14.1436	15.2091	16.5091	0.000309601	0.000416153	0.000542069
RGU297776N0929239E	RGS297776N0929239E	Active	Central	0.193873	11.3026	12.4235	13.7912	0.000788859	0.00108386	0.00144382	7.90263	9.0235	10.3912	0.000551558	0.000787236	0.00108786	14.7026	15.8235	17.1912	0.00102616	0.00138049	0.00179977
RGU297856N0929216E	RGS297856N0929216E	Active	Central	0.0171296	10.9796	12.0685	13.397	6.77077e-05	9.30278e-05	0.000123923	7.57962	8.66846	9.99703	4.6741e-05	6.68194e-05	9.24726e-05	14.3796	15.4685	16.797	8.86744e-05	0.000119236	0.000155373
RGU297990N0929199E	RGS297990N0929199E	Active	Central	0.238552	14.2764	15.6922	17.4197	0.00122604	0.00168454	0.00224398	10.8764	12.2922	14.0197	0.000934055	0.00131955	0.00180599	17.6764	19.0922	20.8197	0.00151803	0.00204952	0.00268196
RGU297910N0929237E	RGS297910N0929237E	Transitional	Central	0.0557904	11.8013	12.9716	14.3996	0.000237024	0.000325662	0.000433815	8.40131	9.57163	10.9996	0.000168736	0.000240302	0.000331384	15.2013	16.3716	17.7996	0.000305311	0.000411021	0.000536246
RGU297960N0929222E	RGS297960N0929222E	Transitional	Central	0.0604526	12.3655	13.5917	15.088	0.000269109	0.000369745	0.000492538	8.96545	10.1917	11.688	0.000195115	0.000277252	0.000381547	15.7655	16.9917	18.488	0.000343103	0.000462237	0.000603529
RGU298056N0929214E	RGS298056N0929214E	Transitional	Central	0.11796	14.606	16.0545	17.8218	0.000620255	0.000852206	0.00113523	11.206	12.6545	14.4218	0.000475871	0.000671726	0.000918651	18.006	19.4545	21.2218	0.000764638	0.00103269	0.0013518
RGU298071N0929210E	RGS298071N0929210E	Transitional	Central	0.101527	12.2097	13.4206	14.898	0.000446261	0.000613145	0.000816773	8.80974	10.0206	11.498	0.000321992	0.000457809	0.00063037	15.6097	16.8206	18.298	0.000570529	0.000768481	0.00100318
RGU298119N0929203E	RGS298119N0929203E	Active	Central	0.0414468	29.1853	32.0796	35.6111	0.00043547	0.000598319	0.000797023	25.7853	28.6796	32.2111	0.000384739	0.000534905	0.000720926	32.5853	35.4796	39.0111	0.000486201	0.000661733	0.000873119
RGU298156N0929198E	RGS298156N0929198E	Active	Central	0.0428101	15.5548	17.0973	18.9795	0.000239725	0.000329372	0.000438758	12.1548	13.6973	15.5795	0.000187325	0.000263873	0.000360159	18.9548	20.4973	22.3795	0.000292124	0.000394872	0.000517357
RGU296310N0929328E	RGS296310N0929328E	Active	Central	0.0176895	20.4626	22.4919	24.9679	0.000130311	0.000179042	0.000238502	17.0626	19.0919	21.5679	0.000108659	0.000151977	0.000206024	23.8626	25.8919	28.3679	0.000151963	0.000206107	0.00027098
RGU296345N0929323E	RGS296345N0929323E	Transitional	Central	0.0299957	24.9389	27.412	30.4297	0.000269301	0.000370009	0.000492891	21.5389	24.012	27.0297	0.000232586	0.000324116	0.000437819	28.3389	30.812	33.8297	0.000306016	0.000415903	0.000547963
RGU296354N0929296E	RGS296354N0929296E	Transitional	Central	0.0386645	13.9131	15.2929	16.9764	0.00019366	0.000266081	0.000354447	10.5131	11.8929	13.5764	0.000146334	0.000206924	0.000283459	17.3131	18.6929	20.3764	0.000240985	0.000325238	0.000425435
RGU296406N0929313E	RGS296406N0929313E	Active	Central	0.0105797	9.65216	10.6094	11.7773	3.67619e-05	5.05095e-05	6.72839e-05	6.25216	7.20936	8.3773	2.38125e-05	3.43226e-05	4.78596e-05	13.0522	14.0094	15.1773	4.97114e-05	6.66964e-05	8.67081e-05
RGU296390N0929316E	RGS296390N0929316E	Active	Central	0.0193393	9.9684	10.957	12.1632	6.94017e-05	9.53552e-05	0.000127023	6.5684	7.55696	8.76317	4.57303e-05	6.5766e-05	9.15159e-05	13.3684	14.357	15.5632	9.3073e-05	0.000124944	0.00016253
RGU296376N0929325E	RGS296376N0929325E	Active	Central	0.019249	25.1839	27.6814	30.7287	0.000174516	0.000239778	0.000319409	21.7839	24.2814	27.3287	0.000150955	0.000210327	0.000284067	28.5839	31.0814	34.1287	0.000198076	0.000269229	0.00035475
RGU296212N0929348E	RGS296212N0929348E	Active	Central	0.0796728	16.163	17.7658	19.7216	0.000463589	0.000636953	0.000848488	12.763	14.3658	16.3216	0.00036607	0.000515054	0.000702208	19.563	21.1658	23.1216	0.000561109	0.000758853	0.000994767
RGU296138N0929327E	RGS296138N0929327E	Active	Central	0.261619	14.4262	15.8568	17.6024	0.0013587	0.0018668	0.00248678	11.0262	12.4568	14.2024	0.00103848	0.00146653	0.00200644	17.8262	19.2568	21.0024	0.00167892	0.00226708	0.00296711
RGU296617N0929393E	RGS296617N0929393E	Active	Central	0.143434	15.8971	17.4736	19.3971	0.000820862	0.00112783	0.00150239	12.4971	14.0736	15.9971	0.0006453	0.00090838	0.00123905	19.2971	20.8736	22.7971	0.000996425	0.00134729	0.00176573
RGU296630N0929388E	RGS296630N0929388E	Active	Central	0.0266552	11.8518	13.0271	14.4612	0.000113728	0.000156258	0.000208152	8.45179	9.62713	11.0612	8.11022e-05	0.000115476	0.000159213	15.2518	16.4271	17.8612	0.000146354	0.00019704	0.000257091
RGU296595N0929359E	RGS296595N0929359E	Active	Central	0.197775	19.9931	21.9758	24.3951	0.00142349	0.00195582	0.00260535	16.5931	18.5758	20.9951	0.00118141	0.00165322	0.00224224	23.3931	25.3758	27.7951	0.00166557	0.00225842	0.00296847
RGU296592N0929384E	RGS296592N0929384E	Active	Central	0.302369	15.1141	16.6129	18.4418	0.00164521	0.00226046	0.00301116	11.7141	13.2129	15.0418	0.00127511	0.00179783	0.00245601	18.5141	20.0129	21.8418	0.00201531	0.00272308	0.00356631
RGU296536N0929298E	RGS296536N0929298E	Active	Central	0.131761	13.0536	14.3481	15.9277	0.000619183	0.000850734	0.00113327	9.65362	10.9481	12.5277	0.000457908	0.00064914	0.000891353	16.4536	17.7481	19.3277	0.000780458	0.00105233	0.00137518
RGU296633N0929154E	RGS296633N0929154E	Transitional	Central	0.0108162	11.3825	12.5113	13.8887	4.43217e-05	6.08963e-05	8.11202e-05	7.98254	9.11134	10.4887	3.10827e-05	4.43475e-05	6.12617e-05	14.7825	15.9113	17.2887	5.75608e-05	7.74451e-05	0.000100979
RGU296718N0929169E	RGS296718N0929169E	Active	Central	0.0320927	13.7901	15.1577	16.8263	0.000159323	0.000218903	0.000291601	10.3901	11.7577	13.4263	0.000120041	0.000169801	0.000232679	17.1901	18.5577	20.2263	0.000198604	0.000268005	0.000350524
RGU296701N0929261E	RGS296701N0929261E	Active	Central	0.0411646	20.1255	22.1213	24.5566	0.000298245	0.000409777	0.000545865	16.7255	18.7213	21.1566	0.000247859	0.000346795	0.000470287	23.5255	25.5213	27.9566	0.00034863	0.000472759	0.000621443
RGU296722N0929266E	RGS296722N0929266E	Active	Central	0.0389322	15.5791	17.124	19.0091	0.00021835	0.000300004	0.000399636	12.1791	13.724	15.6091	0.000170697	0.000240438	0.000328157	18.9791	20.524	22.4091	0.000266003	0.00035957	0.000471116
RGU296748N0929270E	RGS296748N0929270E	Active	Central	0.022005	11.4652	12.6022	13.9895	9.08252e-05	0.00012479	0.000166234	8.06521	9.2022	10.5895	6.3891e-05	9.11226e-05	0.000125832	14.8652	16.0022	17.3895	0.000117759	0.000158458	0.000206635
RGU296711N0929311E	RGS296711N0929311E	Active	Central	0.0699002	17.6745	19.4273	21.566	0.000444763	0.000611087	0.000814031	14.2745	16.0273	18.166	0.000359205	0.00050414	0.000685694	21.0745	22.8273	24.966	0.000530321	0.000718034	0.000942368
RGU296687N0929329E	RGS296820N0929234E	Transitional	Central	0.155316	14.7072	16.1657	17.9453	0.000822335	0.00112986	0.00150509	11.3072	12.7657	14.5453	0.000632229	0.000892224	0.00121993	18.1072	19.5657	21.3453	0.00101244	0.00136749	0.00179025
RGU296647N0929300E	RGS296820N0929234E	Transitional	Central	0.0591568	17.6436	19.3933	21.5282	0.000375745	0.00051626	0.000687711	14.2436	15.9933	18.1282	0.000303338	0.00042575	0.000579099	21.0436	22.7933	24.9282	0.000448153	0.00060677	0.000796323
RGU296804N0929192E	RGS296804N0929192E	Active	Central	0.141124	13.1854	14.4929	16.0884	0.000669876	0.000920384	0.00122605	9.78536	11.0929	12.6884	0.000497141	0.000704465	0.000966943	16.5854	17.8929	19.4884	0.000842611	0.0011363	0.00148515
RGU296763N0929236E	RGS296763N0929236E	Active	Central	0.0192433	12.302	13.522	15.0105	8.52231e-05	0.000117093	0.00015598	8.90198	10.122	11.6105	6.16693e-05	8.76509e-05	0.00012065	15.702	16.922	18.4105	0.000108777	0.000146535	0.000191311
RGU296645N0929105E	RGS296645N0929105E	Active	Central	0.0889114	13.5211	14.862	16.4981	0.000432786	0.000594631	0.00079211	10.1211	11.462	13.0981	0.000323958	0.000458596	0.000628868	16.9211	18.262	19.8981	0.000541613	0.000730665	0.000955351
RGU296771N0929041E	RGS296771N0929041E	Transitional	Central	0.0306237	15.703	17.2603	19.1604	0.000173118	0.000237858	0.000316852	12.303	13.8603	15.7604	0.000135635	0.000191004	0.000260626	19.103	20.6603	22.5604	0.000210602	0.000284712	0.000373077
RGU296762N0929094E	RGS296762N0929094E	Active	Central	0.0474327	20.9439	23.0209	25.5552	0.000357633	0.000491374	0.000654561	17.5439	19.6209	22.1552	0.000299575	0.000418802	0.000567474	24.3439	26.4209	28.9552	0.00041569	0.000563946	0.000741647
RGU296805N0929103E	RGS296805N0929103E	Active	Central	0.0281534	19.4381	21.3657	23.7178	0.000197009	0.000270683	0.000360578	16.0381	17.9657	20.3178	0.000162549	0.000227608	0.000308888	22.8381	24.7657	27.1178	0.000231469	0.000313758	0.000412267
RGU296823N0929069E	RGS296823N0929069E	Active	Central	0.030543	14.231	15.6422	17.3642	0.000156477	0.000214993	0.000286393	10.831	12.2422	13.9642	0.000119092	0.000168262	0.000230316	17.631	19.0422	20.7642	0.000193861	0.000261724	0.00034247
RGU296934N0929110E	RGS296934N0929110E	Active	Central	0.0110293	14.8	16.2677	18.0586	5.87644e-05	8.074e-05	0.000107554	11.4	12.8677	14.6586	4.52645e-05	6.38651e-05	8.73042e-05	18.2	19.6677	21.4586	7.22643e-05	9.76149e-05	0.000127804
RGU296937N0929090E	RGS296937N0929090E	Active	Central	0.0526202	18.169	19.9708	22.1693	0.000344181	0.000472891	0.000629939	14.769	16.5708	18.7693	0.000279773	0.000392382	0.000533329	21.569	23.3708	25.5693	0.000408588	0.0005534	0.00072655
RGU296900N0929094E	RGS296900N0929094E	Active	Central	0.0265617	10.5136	11.5562	12.8284	0.000100533	0.000138129	0.000184002	7.11359	8.15622	9.4284	6.80217e-05	9.74893e-05	0.000135234	13.9136	14.9562	16.2284	0.000133045	0.000178768	0.000232769
RGU296872N0929089E	RGS296872N0929089E	Active	Central	0.0179926	10.8102	11.8822	13.1903	7.00211e-05	9.62063e-05	0.000128157	7.41019	8.48222	9.79029	4.79982e-05	6.86777e-05	9.51224e-05	14.2102	15.2822	16.5903	9.2044e-05	0.000123735	0.000161191
RGU296947N0929166E	RGS296947N0929166E	Active	Central	0.0932425	12.9318	14.2142	15.779	0.000434085	0.000596416	0.000794487	9.53177	10.8142	12.379	0.000319956	0.000453755	0.000623294	16.3318	17.6142	19.179	0.000548214	0.000739077	0.00096568
RGU296963N0929156E	RGS296963N0929156E	Active	Central	0.0443048	10.4376	11.4727	12.7357	0.000166477	0.000228732	0.000304695	7.03759	8.07267	9.33565	0.000112248	0.000160946	0.000223352	13.8376	14.8727	16.1357	0.000220706	0.000296519	0.000386039
RGU296972N0929169E	RGS296972N0929169E	Active	Central	0.0341761	10.6069	11.6587	12.9422	0.000130501	0.000179303	0.00023885	7.20687	8.25874	9.54221	8.8669e-05	0.000127013	0.000176102	14.0069	15.0587	16.3422	0.000172332	0.000231592	0.000301597
RGU296996N0929149E	RGS296996N0929149E	Active	Central	0.0699399	17.5599	19.3013	21.4261	0.000442129	0.000607468	0.00080921	14.1599	15.9013	18.0261	0.000356523	0.00050046	0.000680801	20.9599	22.7013	24.8261	0.000527736	0.000714476	0.00093762
RGU297019N0929250E	RGS297019N0929250E	Active	Central	0.0343356	11.577	12.725	14.1259	0.000143101	0.000196615	0.000261912	8.17697	9.32505	10.7259	0.000101074	0.000144082	0.000198871	14.977	16.125	17.5259	0.000185128	0.000249149	0.000324952
RGU296974N0929347E	RGS296974N0929347E	Active	Central	0.0362221	10.0574	11.0547	12.2717	0.000131147	0.000180192	0.000240034	6.65736	7.65474	8.87172	8.68117e-05	0.000124772	0.00017353	13.4574	14.4547	15.6717	0.000175483	0.000235611	0.000306537
RGU296906N0929310E	RGS296906N0929310E	Active	Central	0.019159	12.2775	13.4951	14.9807	8.46811e-05	0.000116348	0.000154988	8.87753	10.0951	11.5807	6.12304e-05	8.70352e-05	0.000119812	15.6775	16.8951	18.3807	0.000108132	0.000145662	0.000190164
RGU296876N0929326E	RGS296876N0929326E	Active	Central	0.0275269	13.4441	14.7774	16.4042	0.000133227	0.000183049	0.00024384	10.0441	11.3774	13.0042	9.95343e-05	0.000140933	0.000193301	16.8441	18.1774	19.8042	0.00016692	0.000225165	0.00029438
RGU296873N0929302E	RGS296873N0929302E	Active	Central	0.0275216	12.9594	14.2445	15.8126	0.000128398	0.000176414	0.000235002	9.55935	10.8445	12.4126	9.47118e-05	0.000134306	0.000184472	16.3594	17.6445	19.2126	0.000162085	0.000218522	0.000285531
RGU296242N0929086E	RGS296242N0929086E	Active	Central	0.0504576	13.8345	15.2064	16.8804	0.000251299	0.000345276	0.000459943	10.4345	11.8064	13.4804	0.000189539	0.000268075	0.000367303	17.2345	18.6064	20.2804	0.00031306	0.000422476	0.000552583
RGU297566N0929232E	RGS297566N0929232E	Active	Central	0.014398	9.74733	10.714	11.8934	5.05231e-05	6.94167e-05	9.24703e-05	6.34733	7.31396	8.49342	3.28999e-05	4.73878e-05	6.60356e-05	13.1473	14.114	15.2934	6.81462e-05	9.14457e-05	0.000118905
RGU297493N0929251E	RGS297493N0929251E	Active	Central	0.0167419	12.3909	13.6197	15.119	7.46811e-05	0.000102609	0.000136686	8.9909	10.2197	11.719	5.4189e-05	7.69938e-05	0.000105947	15.7909	17.0197	18.519	9.51732e-05	0.000128224	0.000167424
RGU297552N0929233E	RGS297552N0929233E	Active	Central	0.0168609	15.3386	16.8598	18.7158	9.31043e-05	0.000127922	0.000170405	11.9386	13.4598	15.3158	7.24666e-05	0.000102125	0.000139448	18.7386	20.2598	22.1158	0.000113742	0.000153719	0.000201362
RGU297539N0929233E	RGS297539N0929233E	Active	Central	0.0118662	16.5715	18.2148	20.22	7.07903e-05	9.72631e-05	0.000129564	13.1715	14.8148	16.82	5.62661e-05	7.91079e-05	0.000107778	19.9715	21.6148	23.62	8.53145e-05	0.000115418	0.000151351
RGU297512N0929285E	RGS297512N0929285E	Active	Central	0.129057	13.3095	14.6294	16.2398	0.000618366	0.000849611	0.00113177	9.90947	11.2294	12.8398	0.0004604	0.000652153	0.00089482	16.7095	18.0294	19.6398	0.000776332	0.00104707	0.00136872
RGU297524N0929247E	RGS297524N0929247E	Active	Central	0.027621	9.74467	10.711	11.8902	9.68967e-05	0.000133132	0.000177346	6.34467	7.31104	8.49017	6.30886e-05	9.08721e-05	0.000126634	13.1447	14.111	15.2902	0.000130705	0.000175392	0.000228058
RGU297623N0929115E	RGS297623N0929115E	Active	Central	0.0318876	26.9736	29.6485	32.9124	0.000309643	0.000425438	0.000566728	23.5736	26.2485	29.5124	0.000270613	0.00037665	0.000508182	30.3736	33.0485	36.3124	0.000348674	0.000474226	0.000625273
RGU297617N0929094E	RGS297681N0929004E	Transitional	Central	0.0805417	10.3286	11.3529	12.6027	0.000299479	0.000411472	0.000548124	6.92864	7.95292	9.20272	0.000200896	0.000288244	0.000400249	13.7286	14.7529	16.0027	0.000398062	0.000534701	0.000695998
RGU297610N0929090E	RGS297681N0929004E	Active	Central	0.0592102	15.1401	16.6415	18.4735	0.000322721	0.000443407	0.000590664	11.7401	13.2415	15.0735	0.000250248	0.000352815	0.000481954	18.5401	20.0415	21.8735	0.000395195	0.000533998	0.000699374
RGU297674N0929036E	RGS297681N0929004E	Active	Central	0.0993479	22.3295	24.5439	27.2458	0.00079862	0.00109727	0.00146168	18.9295	21.1439	23.8458	0.000677018	0.000945271	0.00127928	25.7295	27.9439	30.6458	0.000920222	0.00124928	0.00164408
RGU297692N0929066E	RGS297681N0929004E	Active	Central	0.0239541	14.5779	16.0235	17.7875	0.000125712	0.000172724	0.000230086	11.1779	12.6235	14.3875	9.63923e-05	0.000136074	0.000186106	17.9779	19.4235	21.1875	0.000155032	0.000209373	0.000274065
RGU297686N0929078E	RGS297686N0929078E	Active	Central	0.0787935	17.5294	19.2678	21.3889	0.000497234	0.00068318	0.000910066	14.1294	15.8678	17.9889	0.000400791	0.000562626	0.000765401	20.9294	22.6678	24.7889	0.000593677	0.000803734	0.00105473
RGU297680N0929133E	RGS297680N0929133E	Active	Central	0.047555	19.0375	20.9255	23.2291	0.000325919	0.0004478	0.000596516	15.6375	17.5255	19.8291	0.000267712	0.000375041	0.000509205	22.4375	24.3255	26.6291	0.000384126	0.000520559	0.000683827
RGU297293N0929312E	RGS297293N0929312E	Active	Central	0.0237065	10.3319	11.3565	12.6067	8.8176e-05	0.00012115	0.000161385	6.93191	7.95652	9.20671	5.91593e-05	8.48795e-05	0.00011786	13.7319	14.7565	16.0067	0.000117193	0.000157421	0.00020491
RGU297287N0929277E	RGS297287N0929277E	Active	Central	0.213476	15.2488	16.761	18.6062	0.00117189	0.00161013	0.00214486	11.8488	13.361	15.2062	0.000910596	0.00128351	0.00175292	18.6488	20.161	22.0062	0.00143318	0.00193675	0.0025368
RGU297170N0929297E	RGS297170N0929297E	Active	Central	0.0268408	24.164	26.5603	29.4843	0.000233489	0.000320805	0.000427346	20.764	23.1603	26.0843	0.000200636	0.000279739	0.000378066	27.564	29.9603	32.8843	0.000266343	0.000361872	0.000476626
RGU297175N0929184E	RGS297175N0929184E	Active	Central	0.189889	15.305	16.8228	18.6747	0.00104625	0.0014375	0.0019149	11.905	13.4228	15.2747	0.000813825	0.00114698	0.00156627	18.705	20.2228	22.0747	0.00127867	0.00172803	0.00226354
RGU297186N0929063E	RGS297186N0929063E	Transitional	Central	0.0698322	21.019	23.1035	25.6469	0.00052841	0.000726015	0.000967127	17.619	19.7035	22.2469	0.000442936	0.000619172	0.000838916	24.419	26.5035	29.0469	0.000613885	0.000832859	0.00109534
RGU297408N0929025E	RGS297408N0929025E	Transitional	Central	0.345167	15.9297	17.5094	19.4369	0.00197942	0.00271965	0.00362286	12.5297	14.1094	16.0369	0.00155694	0.00219155	0.00298913	19.3297	20.9094	22.8369	0.00240191	0.00324776	0.00425658
RGU298254N0929390E	RGS298254N0929390E	Active	Central	0.0358174	16.1107	17.7083	19.6578	0.000207735	0.00028542	0.00038021	12.7107	14.3083	16.2578	0.000163895	0.00023062	0.000314449	19.5107	21.1083	23.0578	0.000251576	0.000340221	0.00044597
RGU298071N0929428E	RGS298071N0929428E	Active	Central	0.0749918	16.7699	18.433	20.4622	0.000452739	0.000622046	0.00082863	13.3699	15.033	17.0622	0.000360949	0.000507309	0.000690945	20.1699	21.833	23.8622	0.000544529	0.000736784	0.000966315
RGU296472N0929429E	RGS296472N0929429E	Active	Central	0.0226934	11.7105	12.8718	14.2889	9.56706e-05	0.000131448	0.000175102	8.31052	9.47184	10.8889	6.78939e-05	9.67268e-05	0.000133437	15.1105	16.2718	17.6889	0.000123447	0.000166169	0.000216767
RGU296297N0929389E	RGS296297N0929389E	Transitional	Central	0.0971546	16.118	17.7164	19.6667	0.000563738	0.000774554	0.00103179	12.718	14.3164	16.2667	0.00044482	0.000625907	0.00085341	19.518	21.1164	23.0667	0.000682655	0.0009232	0.00121016
RGU296676N0929401E	RGS296676N0929401E	Active	Central	0.069141	14.8598	16.3334	18.1315	0.00036987	0.000508188	0.000676958	11.4598	12.9334	14.7315	0.000285242	0.000402402	0.000550016	18.2598	19.7334	21.5315	0.000454499	0.000613973	0.000803901
RGU296710N0929385E	RGS296710N0929385E	Active	Central	0.025305	13.3475	14.6711	16.2862	0.000121593	0.000167064	0.000222547	9.94749	11.2711	12.8862	9.06198e-05	0.000128348	0.000176087	16.7475	18.0711	19.6862	0.000152567	0.000205781	0.000269007
RGU296785N0929415E	RGS296785N0929415E	Active	Central	0.0244011	12.807	14.0771	15.6267	0.000112502	0.000154573	0.000205907	9.407	10.6771	12.2267	8.26349e-05	0.000117239	0.000161107	16.207	17.4771	19.0267	0.000142369	0.000191907	0.000250708
RGU296890N0929412E	RGS296890N0929412E	Active	Central	0.0787791	11.259	12.3756	13.738	0.000319311	0.000438721	0.000584422	7.85903	8.97558	10.338	0.000222886	0.000318189	0.000439784	14.659	15.7756	17.138	0.000415737	0.000559253	0.000729061
RGU296926N0928665E	RGS296926N0928665E	Transitional	Central	0.135048	17.6618	19.4133	21.5504	0.000858671	0.00117978	0.00157159	14.2618	16.0133	18.1504	0.000693372	0.000973157	0.00132364	21.0618	22.8133	24.9504	0.00102397	0.00138641	0.00181954
RGU296708N0929439E	RGS296708N0929439E	Active	Central	0.0332887	13.4767	14.8132	16.4439	0.000161504	0.0002219	0.000295594	10.0767	11.4132	13.0439	0.000120759	0.000170969	0.000234476	16.8767	18.2132	19.8439	0.000202249	0.000272832	0.000356712
RGU296650N0929408E	RGS296650N0929408E	Active	Central	0.0396136	11.2724	12.3903	13.7543	0.000160755	0.000220872	0.000294224	7.87245	8.99032	10.3543	0.000112268	0.000160263	0.000221493	14.6724	15.7903	17.1543	0.000209242	0.00028148	0.000366954
RGU296614N0929404E	RGS296614N0929404E	Active	Central	0.0889652	12.1098	13.3107	14.776	0.000387845	0.000532884	0.000709856	8.70975	9.91066	11.376	0.000278951	0.000396767	0.000546516	15.5098	16.7107	18.176	0.000496738	0.000669	0.000873196
RGU296597N0929408E	RGS296597N0929408E	Active	Central	0.0875741	14.3887	15.8156	17.5567	0.000453627	0.000623266	0.000830255	10.9887	12.4156	14.1567	0.000346437	0.000489278	0.000669469	17.7887	19.2156	20.9567	0.000560818	0.000757255	0.000991041
RGU297035N0929452E	RGS297035N0929452E	Active	Central	0.15343	15.9043	17.4815	19.4059	0.00087847	0.00120698	0.00160783	12.5043	14.0815	16.0059	0.000690671	0.000972235	0.00132613	19.3043	20.8815	22.8059	0.00106627	0.00144173	0.00188952
RGU297076N0929426E	RGS297076N0929426E	Active	Central	0.0669905	13.9742	15.36	17.0509	0.00033701	0.000463038	0.000616814	10.5742	11.96	13.6509	0.000255013	0.000360543	0.00049382	17.3742	18.76	20.4509	0.000419006	0.000565533	0.000739809
RGU296916N0928712E	RGS296916N0928712E	Active	Central	0.0967781	13.4845	14.8217	16.4534	0.0004698	0.000645487	0.000859855	10.0845	11.4217	13.0534	0.000351344	0.000497416	0.000682171	16.8845	18.2217	19.8534	0.000588256	0.000793557	0.00103754
RGU297364N0929380E	RGS297364N0929380E	Active	Central	0.0744949	14.0371	15.4292	17.1277	0.00037645	0.000517228	0.000689001	10.6371	12.0292	13.7277	0.000285268	0.00040325	0.000552228	17.4371	18.8292	20.5277	0.000467632	0.000631205	0.000825773
RGU295022N0928303E	RGS295022N0928303E	Active	Central	0.0934129	21.651	23.7981	26.4179	0.000728092	0.00100037	0.0013326	18.251	20.3981	23.0179	0.000613755	0.000857449	0.00116109	25.051	27.1981	29.8179	0.00084243	0.00114329	0.0015041
RGU295714N0925949E	RGS295714N0925949E	Active	Central	0.218054	27.7274	30.4771	33.8322	0.00217659	0.00299054	0.00398371	24.3274	27.0771	30.4322	0.00190969	0.00265692	0.00358337	31.1274	33.8771	37.2322	0.00244348	0.00332417	0.00438406
RGU295766N0925968E	RGS295766N0925968E	Active	Central	0.31731	20.1267	22.1227	24.5581	0.00229911	0.00315889	0.00420797	16.7267	18.7227	21.1581	0.00191072	0.0026734	0.00362538	23.5267	25.5227	27.9581	0.0026875	0.00364437	0.00479055
RGU295827N0925993E	RGS296034N0925995E	Active	Central	0.186005	21.607	23.7498	26.3643	0.00144684	0.00198791	0.0026481	18.207	20.3498	22.9643	0.00121917	0.00170332	0.00230659	25.007	27.1498	29.7643	0.00167451	0.0022725	0.0029896
RGU295876N0926014E	RGS296034N0925995E	Active	Central	0.031245	12.3079	13.5285	15.0178	0.000138442	0.000190214	0.000253385	8.90791	10.1285	11.6178	0.000100198	0.000142409	0.000196019	15.7079	16.9285	18.4178	0.000176686	0.000238019	0.00031075
RGU295940N0926048E	RGS295973N0926191E	Transitional	Central	0.0472504	18.7229	20.5796	22.8451	0.000318479	0.000437578	0.000582899	15.3229	17.1796	19.4451	0.000260644	0.000365285	0.000496147	22.1229	23.9796	26.2451	0.000376313	0.000509871	0.00066965
RGU296033N0925997E	RGS295973N0926191E	Active	Central	0.123124	22.8131	25.0754	27.8359	0.00101118	0.00138932	0.00185072	19.4131	21.6754	24.4359	0.000860476	0.00120094	0.00162466	26.2131	28.4754	31.2359	0.00116188	0.0015777	0.00207678
RGU295988N0925963E	RGS295973N0926191E	Active	Central	0.238439	25.3474	27.8611	30.9282	0.00217577	0.00298942	0.00398222	21.9474	24.4611	27.5282	0.00188392	0.00262461	0.00354445	28.7474	31.2611	34.3282	0.00246762	0.00335423	0.00441999
RGU295546N0926122E	RGS295546N0926122E	Transitional	Central	0.049883	10.4054	11.4373	12.6963	0.000186858	0.000256736	0.000341999	7.00537	8.03726	9.29634	0.000125801	0.000180415	0.000250414	13.8054	14.8373	16.0963	0.000247915	0.000333057	0.000433584
RGU295316N0926155E	RGS295316N0926155E	Transitional	Central	0.115625	17.9736	19.756	21.9309	0.000748151	0.00102793	0.00136931	14.5736	16.356	18.5309	0.000606626	0.000851024	0.00115702	21.3736	23.156	25.3309	0.000889676	0.00120484	0.0015816
RGU295330N0926154E	RGS295330N0926154E	Active	Central	0.0584162	17.4512	19.1819	21.2935	0.000366996	0.000504239	0.000671698	14.0512	15.7819	17.8935	0.000295495	0.000414862	0.000564446	20.8512	22.5819	24.6935	0.000438498	0.000593615	0.00077895
RGU295366N0926109E	RGS295366N0926109E	Transitional	Central	0.0249035	28.2381	31.0385	34.4554	0.000253162	0.000347835	0.000463352	24.8381	27.6385	31.0554	0.00022268	0.000309732	0.000417629	31.6381	34.4385	37.8554	0.000283644	0.000385937	0.000509074
RGU295720N0926084E	RGS295720N0926084E	Active	Central	0.0719142	15.8361	17.4066	19.3228	0.000409984	0.000563301	0.000750376	12.4361	14.0066	15.9228	0.000321961	0.000453273	0.000618341	19.2361	20.8066	22.7228	0.000498006	0.00067333	0.00088241
RGU295628N0926036E	RGS295628N0926036E	Active	Central	0.0229854	12.9964	14.2852	15.8578	0.000107542	0.000147758	0.000196829	9.59635	10.8852	12.4578	7.94075e-05	0.00011259	0.000154628	16.3964	17.6852	19.2578	0.000135676	0.000182926	0.00023903
RGU295634N0926088E	RGS295634N0926088E	Active	Central	0.0222607	12.3672	13.5937	15.0902	9.91092e-05	0.000136172	0.000181395	8.96723	10.1937	11.6902	7.18621e-05	0.000102113	0.000140525	15.7672	16.9937	18.4902	0.000126356	0.000170231	0.000222266
RGU295044N0925981E	RGS295044N0925981E	Active	Central	0.0216241	15.9704	17.5541	19.4866	0.000124324	0.000170817	0.000227545	12.5704	14.1541	16.0866	9.78563e-05	0.000137732	0.000187843	19.3704	20.9541	22.8866	0.000150792	0.000203901	0.000267247
RGU295035N0925930E	RGS295035N0925930E	Active	Central	0.0618566	11.7235	12.8861	14.3046	0.000261062	0.00035869	0.000477812	8.32345	9.48606	10.9046	0.00018535	0.000264049	0.000364243	15.1235	16.2861	17.7046	0.000336775	0.00045333	0.000591381
RGU295025N0925938E	RGS295025N0925938E	Active	Central	0.178104	17.6336	19.3823	21.516	0.00113062	0.00155343	0.00206933	14.2336	15.9823	18.116	0.000912621	0.00128093	0.00174233	21.0336	22.7823	24.916	0.00134862	0.00182593	0.00239633
RGU295015N0925951E	RGS295015N0925951E	Active	Central	0.13475	16.9801	18.664	20.7186	0.000823704	0.00113174	0.00150759	13.5801	15.264	17.3186	0.00065877	0.00092557	0.00126019	20.3801	22.064	24.1186	0.000988638	0.00133791	0.00175499
RGU295096N0926087E	RGS295096N0926087E	Active	Central	0.0541265	22.8594	25.1263	27.8924	0.000445428	0.000612001	0.000815248	19.4594	21.7263	24.4924	0.000379177	0.000529187	0.000715872	26.2594	28.5263	31.2924	0.000511679	0.000694814	0.000914624
RGU295060N0926097E	RGS295060N0926097E	Active	Central	0.0665092	19.1139	21.0094	23.3222	0.000457649	0.000628792	0.000837615	15.7139	17.6094	19.9222	0.000376242	0.000527033	0.000715505	22.5139	24.4094	26.7222	0.000539056	0.000730551	0.000959726
RGU295007N0926075E	RGS295007N0926075E	Transitional	Central	0.171102	16.6092	18.2563	20.2661	0.00102307	0.00140566	0.00187248	13.2092	14.8563	16.8661	0.00081364	0.00114387	0.00155834	20.0092	21.6563	23.6661	0.0012325	0.00166744	0.00218662
RGU294980N0926048E	RGS294980N0926048E	Active	Central	0.0266915	11.259	12.3756	13.7379	0.000108187	0.000148645	0.00019801	7.85902	8.97557	10.3379	7.55167e-05	0.000107807	0.000149005	14.659	15.7756	17.1379	0.000140857	0.000189483	0.000247016
RGU294882N0926053E	RGS294882N0926053E	Transitional	Central	0.03245	15.5419	17.0832	18.9638	0.00018156	0.000249457	0.000332302	12.1419	13.6832	15.5638	0.000141842	0.000199808	0.000272724	18.9419	20.4832	22.3638	0.000221279	0.000299105	0.000391881
RGU294956N0926965E	RGS294956N0926965E	Active	Central	0.131971	13.9765	15.3626	17.0538	0.000664019	0.000912336	0.00121533	10.5765	11.9626	13.6538	0.000502486	0.000710421	0.000973027	17.3765	18.7626	20.4538	0.000825551	0.00111425	0.00145762
RGU295738N0926244E	RGS295738N0926244E	Active	Central	0.363654	20.7442	22.8014	25.3115	0.00271574	0.00373132	0.0049705	17.3442	19.4014	21.9115	0.00227062	0.00317493	0.00430283	24.1442	26.2014	28.7115	0.00316085	0.00428771	0.00563817
RGU295789N0926274E	RGS295789N0926274E	Active	Central	0.0231688	12.7322	13.9949	15.5355	0.000106196	0.00014591	0.000194367	9.33222	10.5949	12.1355	7.78377e-05	0.000110461	0.000151829	16.1322	17.3949	18.9355	0.000134555	0.000181358	0.000236905
RGU295831N0926284E	RGS295600N0926428E	Active	Central	0.0248267	10.8797	11.9587	13.2751	9.72387e-05	0.000133602	0.000177972	7.47973	8.55866	9.87514	6.68509e-05	9.56174e-05	0.00013239	14.2797	15.3587	16.6751	0.000127627	0.000171587	0.000223554
RGU295578N0926419E	RGS295578N0926419E	Active	Central	0.015723	10.5139	11.5566	12.8288	5.95118e-05	8.17669e-05	0.000108922	7.11395	8.1566	9.42883	4.02669e-05	5.77108e-05	8.00546e-05	13.9139	14.9566	16.2288	7.87567e-05	0.000105823	0.000137789
RGU295474N0926326E	RGS295474N0926326E	Transitional	Central	0.208313	13.4703	14.8061	16.4361	0.00101017	0.00138794	0.00184888	10.0703	11.4061	13.0361	0.000755198	0.00106922	0.00146641	16.8703	18.2061	19.8361	0.00126515	0.00170666	0.00223134
RGU295547N0926276E	RGS295547N0926276E	Active	Central	0.0970305	15.8682	17.4418	19.3619	0.00055429	0.000761573	0.00101449	12.4682	14.0418	15.9619	0.000435525	0.000613116	0.000836346	19.2682	20.8418	22.7619	0.000673055	0.00091003	0.00119264
RGU295619N0926273E	RGS295619N0926273E	Transitional	Central	0.077682	11.4721	12.6098	13.998	0.000320824	0.000440799	0.00058719	8.07212	9.20979	10.598	0.000225741	0.000321946	0.000444566	14.8721	16.0098	17.398	0.000415906	0.000559653	0.000729814
RGU295660N0926274E	RGS295660N0926274E	Transitional	Central	0.0212351	12.6374	13.8907	15.4198	9.66084e-05	0.000132736	0.000176818	9.23742	10.4907	12.0198	7.06166e-05	0.000100246	0.000137831	16.0374	17.2907	18.8198	0.0001226	0.000165226	0.000215806
RGU295055N0926311E	RGS295055N0926311E	Active	Central	0.156148	14.6557	16.1091	17.8825	0.000823844	0.00113193	0.00150785	11.2557	12.7091	14.4825	0.000632719	0.000893023	0.00122116	18.0557	19.5091	21.2825	0.00101497	0.00137084	0.00179453
RGU294990N0926275E	RGS294990N0926275E	Active	Central	0.145362	19.0073	20.8922	23.1922	0.00099466	0.00136662	0.00182048	15.6073	17.4922	19.7922	0.000816736	0.00114422	0.0015536	22.4073	24.2922	26.5922	0.00117258	0.00158903	0.00208737
RGU294955N0926283E	RGS294955N0926283E	Active	Central	0.264164	16.6597	18.3118	20.3277	0.00158432	0.00217679	0.00289971	13.2597	14.9118	16.9277	0.00126098	0.00177262	0.00241471	20.0597	21.7118	23.7277	0.00190766	0.00258096	0.00338472
RGU294939N0926391E	RGS294939N0926391E	Transitional	Central	0.165496	16.4803	18.1146	20.1088	0.000981874	0.00134906	0.00179708	13.0803	14.7146	16.7088	0.000779306	0.00109585	0.00149323	19.8803	21.5146	23.5088	0.00118444	0.00160227	0.00210093
RGU294882N0926368E	RGS294882N0926368E	Transitional	Central	0.0473479	12.1384	13.3421	14.8109	0.000206902	0.000284275	0.000378684	8.73837	9.94212	11.4109	0.000148948	0.000211833	0.000291753	15.5384	16.7421	18.2109	0.000264856	0.000356717	0.000465614
RGU294851N0926297E	RGS294851N0926297E	Active	Central	0.245341	17.3034	19.0194	21.1131	0.00152829	0.00209981	0.00279716	13.9034	15.6194	17.7131	0.00122799	0.00172444	0.00234671	20.7034	22.4194	24.5131	0.00182859	0.00247518	0.00324761
RGU294741N0926283E	RGS294741N0926283E	Active	Central	0.17316	10.7585	11.8254	13.1272	0.000670658	0.000921458	0.00122748	7.35848	8.42539	9.7272	0.00045871	0.000656523	0.000909556	14.1585	15.2254	16.5272	0.000882606	0.00118639	0.0015454
RGU295098N0926617E	RGS295098N0926617E	Active	Central	0.0169924	12.3227	13.5447	15.0358	7.53814e-05	0.000103571	0.000137967	8.92271	10.1447	11.6358	5.45827e-05	7.75727e-05	0.000106769	15.7227	16.9447	18.4358	9.61801e-05	0.00012957	0.000169165
RGU295095N0926624E	RGS295095N0926624E	Active	Central	0.032303	13.6245	14.9756	16.6242	0.00015844	0.00021769	0.000289986	10.2245	11.5756	13.2242	0.000118901	0.000168267	0.000230678	17.0245	18.3756	20.0242	0.000197979	0.000267114	0.000349294
RGU295087N0926627E	RGS295087N0926627E	Active	Central	0.0860343	11.8095	12.9806	14.4096	0.000365767	0.00050255	0.000669448	8.40946	9.58059	11.0096	0.000260461	0.000370917	0.000511489	15.2095	16.3806	17.8096	0.000471073	0.000634182	0.000827407
RGU295166N0926489E	RGS295166N0926489E	Active	Central	0.085293	13.4473	14.7808	16.408	0.000412904	0.000567315	0.000755722	10.0473	11.3808	13.008	0.000308506	0.000436816	0.000599124	16.8473	18.1808	19.808	0.000517303	0.000697813	0.00091232
RGU295146N0926666E	RGS295146N0926666E	Active	Central	0.117336	20.3276	22.3434	24.8031	0.000858659	0.00117976	0.00157157	16.9276	18.9434	21.4031	0.000715039	0.00100024	0.00135614	23.7276	25.7434	28.2031	0.00100228	0.00135929	0.001787
RGU294945N0926567E	RGS294945N0926567E	Active	Central	0.455481	18.5557	20.3959	22.6412	0.00304265	0.00418048	0.00556883	15.1557	16.9959	19.2412	0.00248514	0.00348359	0.00473257	21.9557	23.7959	26.0412	0.00360016	0.00487736	0.00640509
RGU294931N0926584E	RGS294931N0926584E	Active	Central	0.0763401	22.5993	24.8405	27.5751	0.000621084	0.000853346	0.00113674	19.1993	21.4405	24.1751	0.000527644	0.000736545	0.000996584	25.9993	28.2405	30.9751	0.000714525	0.000970146	0.00127691
RGU294910N0926629E	RGS294910N0926629E	Active	Central	0.224096	11.7451	12.9098	14.331	0.000947532	0.00130187	0.00173423	8.3451	9.50985	10.931	0.000673238	0.000959005	0.00132279	15.1451	16.3098	17.731	0.00122183	0.00164474	0.00214567
RGU294909N0926702E	RGS294909N0926702E	Active	Central	0.0262546	11.4662	12.6033	13.9908	0.000108375	0.000148903	0.000198354	8.06625	9.20334	10.5908	7.62393e-05	0.000108733	0.000150151	14.8662	16.0033	17.3908	0.00014051	0.000189072	0.000246557
RGU294832N0926417E	RGS294832N0926417E	Active	Central	0.0542724	12.3696	13.5963	15.093	0.000241678	0.000332056	0.000442333	8.96959	10.1963	11.693	0.000175248	0.000249019	0.000342689	15.7696	16.9963	18.493	0.000308107	0.000415092	0.000541977
RGU295385N0926612E	RGS295385N0926612E	Active	Central	0.0122935	11.1226	12.2257	13.5715	4.92249e-05	6.76331e-05	9.00942e-05	7.72265	8.82567	10.1715	3.41777e-05	4.88241e-05	6.75235e-05	14.5226	15.6257	16.9715	6.42721e-05	8.64421e-05	0.000112665
RGU295580N0926623E	RGS295580N0926623E	Transitional	Central	0.0425455	17.0885	18.7831	20.8509	0.000261734	0.000359612	0.000479041	13.6885	15.3831	17.4509	0.000209658	0.000294518	0.000400927	20.4885	22.1831	24.2509	0.00031381	0.000424707	0.000557154
RGU295560N0926614E	RGS295560N0926614E	Transitional	Central	0.0113097	14.2246	15.6353	17.3565	5.79157e-05	7.95739e-05	0.000106001	10.8246	12.2353	13.9565	4.40725e-05	6.227e-05	8.52359e-05	17.6246	19.0353	20.7565	7.17588e-05	9.68778e-05	0.000126765
RGU295476N0926642E	RGS295476N0926642E	Active	Central	0.0581764	18.2498	20.0597	22.268	0.000382216	0.00052515	0.000699554	14.8498	16.6597	18.868	0.000311008	0.00043614	0.000592742	21.6498	23.4597	25.668	0.000453424	0.00061416	0.000806366
RGU295436N0926609E	RGS295436N0926609E	Active	Central	0.120473	12.0016	13.1917	14.644	0.000520509	0.000715159	0.000952666	8.60156	9.79174	11.244	0.000373051	0.000530836	0.000731478	15.4016	16.5917	18.044	0.000667968	0.000899482	0.00117385
RGU295421N0926607E	RGS295421N0926607E	Active	Central	0.178551	24.6412	27.0848	30.0665	0.0015839	0.00217621	0.00289894	21.2412	23.6848	26.6665	0.00136535	0.00190303	0.00257112	28.0412	30.4848	33.4665	0.00180245	0.0024494	0.00322676
RGU295544N0926505E	RGS295544N0926505E	Transitional	Central	0.104462	18.2489	20.0587	22.2668	0.000686278	0.000942919	0.00125607	14.8489	16.6587	18.8668	0.000558416	0.000783092	0.00106427	21.6489	23.4587	25.6668	0.00081414	0.00110275	0.00144786
RGU295972N0926451E	RGS295972N0926451E	Transitional	Central	0.0282415	18.1642	19.9656	22.1635	0.000184675	0.000253736	0.000338002	14.7642	16.5656	18.7635	0.000150107	0.000210526	0.000286151	21.5642	23.3656	25.5635	0.000219242	0.000296945	0.000389854
RGU295967N0926624E	RGS295967N0926624E	Active	Central	0.0208591	23.0419	25.3269	28.1151	0.000173028	0.000237734	0.000316687	19.6419	21.9269	24.7151	0.000147497	0.00020582	0.000278389	26.4419	28.7269	31.5151	0.00019856	0.000269649	0.000354984
RGU295953N0926581E	RGS295953N0926581E	Transitional	Central	0.0167329	11.6462	12.8011	14.2103	7.01547e-05	9.63898e-05	0.000128401	8.24617	9.40111	10.8103	4.96736e-05	7.07885e-05	9.76796e-05	15.0462	16.2011	17.6103	9.06357e-05	0.000121991	0.000159123
RGU295929N0926571E	RGS295929N0926571E	Active	Central	0.115668	14.7926	16.2596	18.0496	0.000615973	0.000846323	0.00112739	11.3926	12.8596	14.6496	0.000474395	0.000669351	0.000915023	18.1926	19.6596	21.4496	0.00075755	0.00102329	0.00133976
RGU294753N0926644E	RGS294753N0926644E	Active	Central	0.0320331	11.9671	13.1539	14.6019	0.000138004	0.000189612	0.000252583	8.56712	9.75389	11.2019	9.87953e-05	0.000140601	0.00019377	15.3671	16.5539	18.0019	0.000177212	0.000238622	0.000311395
RGU295013N0926688E	RGS295013N0926688E	Active	Central	0.0181898	12.0362	13.2298	14.6862	7.88168e-05	0.000108291	0.000144255	8.63618	9.82979	11.2862	5.65525e-05	8.04609e-05	0.000110859	15.4362	16.6298	18.0862	0.000101081	0.000136122	0.000177652
RGU294955N0926719E	RGS294955N0926719E	Active	Central	0.0617307	15.0092	16.4977	18.3139	0.000333551	0.000458286	0.000610484	11.6092	13.0977	14.9139	0.000257993	0.000363838	0.000497147	18.4092	19.8977	21.7139	0.000409109	0.000552734	0.000723822
RGU295105N0926813E	RGS295105N0926813E	Active	Central	0.0347249	14.0323	15.4239	17.1219	0.000175418	0.000241017	0.00032106	10.6323	12.0239	13.7219	0.000132914	0.000187888	0.000257305	17.4323	18.8239	20.5219	0.000217921	0.000294146	0.000384815
RGU295092N0926829E	RGS295092N0926829E	Active	Central	0.100128	13.4468	14.7803	16.4074	0.000484705	0.000665966	0.000887136	10.0468	11.3803	13.0074	0.000362148	0.00051277	0.0007033	16.8468	18.1803	19.8074	0.000607262	0.000819163	0.00107097
RGU295056N0926839E	RGS295056N0926839E	Active	Central	0.0442887	11.5665	12.7135	14.1131	0.000184415	0.000253379	0.000337528	8.16648	9.31352	10.7131	0.000130206	0.000185618	0.000256214	14.9665	16.1135	17.5131	0.000238625	0.000321141	0.000418842
RGU295053N0926853E	RGS295053N0926853E	Active	Central	0.036226	18.3173	20.1338	22.3503	0.000238882	0.000328215	0.000437216	14.9173	16.7338	18.9503	0.000194542	0.000272789	0.000370706	21.7173	23.5338	25.7503	0.000283223	0.000383641	0.000503727
RGU295030N0926835E	RGS295030N0926835E	Active	Central	0.072169	18.9134	20.789	23.0776	0.000491386	0.000675146	0.000899364	15.5134	17.389	19.6776	0.000403051	0.000564727	0.000766862	22.3134	24.189	26.4776	0.000579721	0.000785564	0.00103187
RGU294998N0926807E	RGS294998N0926807E	Active	Central	0.0459216	10.0534	11.0504	12.2669	0.000166201	0.000228354	0.000304191	6.65345	7.65044	8.86694	0.000109993	0.000158094	0.000219879	13.4534	14.4504	15.6669	0.000222409	0.000298614	0.000388503
RGU295140N0926736E	RGS295140N0926736E	Active	Central	0.118906	34.0377	37.4132	41.5319	0.00145702	0.00200189	0.00266673	30.6377	34.0132	38.1319	0.00131148	0.00181997	0.00244842	37.4377	40.8132	44.9319	0.00160257	0.00218382	0.00288504
RGU295129N0926705E	RGS295129N0926705E	Active	Central	0.0607783	17.0686	18.7613	20.8266	0.000373464	0.000513125	0.000683535	13.6686	15.3613	17.4266	0.000299071	0.000420134	0.000571947	20.4686	22.1613	24.2266	0.000447857	0.000606116	0.000795124
RGU295196N0926728E	RGS295196N0926728E	Active	Central	0.0225719	13.3938	14.7221	16.3428	0.000108837	0.000149538	0.0001992	9.99384	11.3221	12.9428	8.12089e-05	0.000115003	0.000157758	16.7938	18.1221	19.7428	0.000136465	0.000184073	0.000240642
RGU295219N0926778E	RGS295219N0926778E	Active	Central	0.0164287	11.4551	12.5911	13.9773	6.77497e-05	9.30854e-05	0.000123999	8.05515	9.19114	10.5773	4.76409e-05	6.79495e-05	9.38363e-05	14.8551	15.9911	17.3773	8.78584e-05	0.000118221	0.000154163
RGU295306N0926878E	RGS295306N0926878E	Active	Central	0.0994963	15.8101	17.378	19.2911	0.000566298	0.000778071	0.00103647	12.4101	13.978	15.8911	0.000444514	0.000625842	0.000853796	19.2101	20.778	22.6911	0.000688081	0.0009303	0.00121915
RGU295299N0926998E	RGS295299N0926998E	Active	Central	0.0544258	20.3678	22.3877	24.8522	0.000399073	0.00054831	0.000730406	16.9678	18.9877	21.4522	0.000332455	0.000465039	0.00063048	23.7678	25.7877	28.2522	0.00046569	0.000631582	0.000830332
RGU295006N0926957E	RGS295006N0926957E	Active	Central	0.0779903	20.0613	22.0508	24.4783	0.000563252	0.000773886	0.0010309	16.6613	18.6508	21.0783	0.000467792	0.000654561	0.000887706	23.4613	25.4508	27.8783	0.000658712	0.000893211	0.00117409
RGU295349N0926946E	RGS295349N0926946E	Active	Central	0.0149625	11.2819	12.4007	13.7659	6.07702e-05	8.34959e-05	0.000111225	7.88193	9.00074	10.3659	4.24561e-05	6.06033e-05	8.3754e-05	14.6819	15.8007	17.1659	7.90844e-05	0.000106389	0.000138696
RGU295375N0927034E	RGS295375N0927034E	Active	Central	0.173079	20.1691	22.1692	24.6097	0.0012567	0.00172666	0.00230009	16.7691	18.7692	21.2097	0.00104486	0.00146185	0.00198232	23.5691	25.5692	28.0097	0.00146855	0.00199147	0.00261787
RGU295288N0927120E	RGS295288N0927120E	Active	Central	0.126781	15.4612	16.9945	18.8653	0.000705664	0.000969555	0.00129155	12.0612	13.5945	15.4653	0.000550485	0.000775581	0.00105878	18.8612	20.3945	22.2653	0.000860844	0.00116353	0.00152432
RGU295286N0927059E	RGS295286N0927059E	Active	Central	0.025422	14.8329	16.3038	18.0987	0.000135749	0.000186514	0.000248456	11.4329	12.9038	14.6987	0.000104633	0.000147619	0.000201782	18.2329	19.7038	21.4987	0.000166866	0.00022541	0.000295131
RGU295175N0927042E	RGS295175N0927042E	Active	Central	0.111158	13.9406	15.3231	17.0099	0.00055786	0.000766478	0.00102103	10.5406	11.9231	13.6099	0.000421802	0.000596406	0.000816941	17.3406	18.7231	20.4099	0.000693917	0.000936549	0.00122511
RGU295092N0926947E	RGS295092N0926947E	Active	Central	0.0370893	16.0847	17.6798	19.6261	0.000214765	0.000295079	0.000393076	12.6847	14.2798	16.2261	0.000169368	0.000238332	0.00032498	19.4847	21.0798	23.0261	0.000260163	0.000351826	0.000461172
RGU295147N0926984E	RGS295147N0926984E	Active	Central	0.193675	14.703	16.161	17.9402	0.00102513	0.00140849	0.00187626	11.303	12.761	14.5402	0.000788075	0.00111217	0.00152067	18.103	19.561	21.3402	0.00126219	0.00170481	0.00223184
RGU295064N0927107E	RGS295064N0927107E	Active	Central	0.215533	11.4877	12.6269	14.017	0.00089135	0.00122468	0.0016314	8.08769	9.22692	10.617	0.000627538	0.000894915	0.00123568	14.8877	16.0269	17.417	0.00115516	0.00155444	0.00202712
RGU295093N0927180E	RGS295093N0927180E	Active	Central	0.0426371	11.1486	12.2542	13.6032	0.000171124	0.000235118	0.000313201	7.74862	8.85422	10.2032	0.000118936	0.000169883	0.00023492	14.5486	15.6542	17.0032	0.000223312	0.000300353	0.000391483
RGU295181N0927158E	RGS295181N0927158E	Active	Central	0.0175102	8.78444	9.65558	10.7185	5.53742e-05	7.60821e-05	0.000101349	5.38444	6.25558	7.31853	3.39417e-05	4.92914e-05	6.92004e-05	12.1844	13.0556	14.1185	7.68067e-05	0.000102873	0.000133498
RGU294790N0926809E	RGS294790N0926809E	Active	Central	0.0557729	9.47902	10.419	11.566	0.000190322	0.000261495	0.000348338	6.07902	7.01905	8.16604	0.000122056	0.000176163	0.000245939	12.879	13.819	14.966	0.000258588	0.000346828	0.000450738
RGU294899N0926747E	RGS294899N0926747E	Active	Central	0.0859806	11.3624	12.4892	13.864	0.000351699	0.000483221	0.000643701	7.96236	9.08915	10.464	0.000246459	0.000351671	0.00048584	14.7624	15.8892	17.264	0.00045694	0.000614772	0.000801561
RGU294914N0926738E	RGS294914N0926738E	Active	Central	0.251997	19.107	21.0018	23.3138	0.00173336	0.00238157	0.0031725	15.707	17.6018	19.9138	0.00142492	0.00199602	0.00270984	22.507	24.4018	26.7138	0.00204181	0.00276713	0.00363517
RGU294829N0926825E	RGS294828N0926978E	Active	Central	0.041064	15.2727	16.7873	18.6354	0.000225778	0.00031021	0.000413231	11.8727	13.3873	15.2354	0.000175515	0.000247382	0.000337838	18.6727	20.1873	22.0354	0.00027604	0.000373038	0.000488625
RGU294970N0926928E	RGS294828N0926978E	Active	Central	0.056798	20.5123	22.5464	25.0285	0.00041942	0.000576267	0.000767648	17.1123	19.1464	21.6285	0.0003499	0.000489366	0.000663366	23.9123	25.9464	28.4285	0.000488941	0.000663168	0.000871929
RGU294872N0926855E	RGS294872N0926855E	Active	Central	0.095186	15.701	17.258	19.1579	0.000538024	0.000739225	0.000984724	12.301	13.858	15.7579	0.000421517	0.00059359	0.000809962	19.101	20.658	22.5579	0.000654532	0.000884859	0.00115949
RGU294828N0926976E	RGS294828N0926976E	Active	Central	0.0594221	12.8555	14.1304	15.686	0.000275005	0.000377846	0.00050333	9.45554	10.7304	12.286	0.000202272	0.000286931	0.000394231	16.2555	17.5304	19.086	0.000347738	0.000468762	0.000612429
RGU294845N0926957E	RGS294845N0926957E	Active	Central	0.0400092	14.2214	15.6317	17.3526	0.000204835	0.000281436	0.000374902	10.8214	12.2317	13.9526	0.000155864	0.000220222	0.000301445	17.6214	19.0317	20.7526	0.000253807	0.00034265	0.000448358
RGU294883N0926982E	RGS294883N0926982E	Active	Central	0.0705513	10.1887	11.1991	12.432	0.000258777	0.00035555	0.000473629	6.7887	7.7991	9.03197	0.000172423	0.000247607	0.000344097	13.5887	14.5991	15.832	0.000345132	0.000463493	0.000603162
RGU294933N0926873E	RGS294933N0926873E	Active	Central	0.0947208	14.1882	15.5952	17.3121	0.000483811	0.000664737	0.000885498	10.7882	12.1952	13.9121	0.000367872	0.000519814	0.000711591	17.5882	18.9952	20.7121	0.000599749	0.00080966	0.00105941
RGU294986N0926869E	RGS294986N0926869E	Active	Central	0.0169063	14.1555	15.5593	17.2722	8.61543e-05	0.000118373	0.000157685	10.7555	12.1593	13.8722	6.5461e-05	9.2506e-05	0.000126645	17.5555	18.9593	20.6722	0.000106848	0.000144239	0.000188725
RGU294812N0926746E	RGS294812N0926746E	Active	Central	0.0281801	10.9358	12.0203	13.3436	0.000110942	0.000152431	0.000203053	7.53584	8.62034	9.94361	7.64499e-05	0.000109315	0.000151315	14.3358	15.4203	16.7436	0.000145435	0.000195546	0.000254792
RGU295478N0926750E	RGS295478N0926750E	Active	Central	0.0596171	13.2356	14.5482	16.1497	0.000284065	0.000390294	0.000519911	9.8356	11.1482	12.7497	0.000211093	0.000299079	0.000410454	16.6356	17.9482	19.5497	0.000357036	0.000481508	0.000629368
RGU295452N0926769E	RGS295452N0926769E	Transitional	Central	0.0929492	24.9044	27.3741	30.3876	0.000833343	0.00114498	0.00152523	21.5044	23.9741	26.9876	0.000719573	0.00100277	0.00135458	28.3044	30.7741	33.7876	0.000947112	0.00128719	0.00169589
RGU295482N0926797E	RGS295482N0926797E	Active	Central	0.0286987	11.8731	13.0506	14.4873	0.000122667	0.00016854	0.000224513	8.47312	9.65057	11.0873	8.75402e-05	0.000124631	0.000171822	15.2731	16.4506	17.8873	0.000157795	0.000212449	0.000277204
RGU295519N0926790E	RGS295519N0926790E	Active	Central	0.11255	21.8632	24.0313	26.6769	0.000885855	0.00121713	0.00162134	18.4632	20.6313	23.2769	0.000748093	0.00104493	0.0014147	25.2632	27.4313	30.0769	0.00102362	0.00138933	0.00182799
RGU295579N0926735E	RGS295579N0926735E	Active	Central	0.564431	18.905	20.7798	23.0673	0.0038414	0.00527793	0.00703075	15.505	17.3798	19.6673	0.00315053	0.00441435	0.00599445	22.305	24.1798	26.4673	0.00453226	0.00614151	0.00806704
RGU295554N0926749E	RGS295554N0926749E	Active	Central	0.0462499	17.1757	18.879	20.9573	0.000285974	0.000392918	0.000523407	13.7757	15.479	17.5573	0.000229364	0.000322155	0.000438492	20.5757	22.279	24.3573	0.000342584	0.00046368	0.000608322
RGU295513N0926745E	RGS295513N0926745E	Active	Central	0.0463565	12.4947	13.7337	15.2456	0.000208515	0.000286492	0.000381637	9.09466	10.3337	11.8456	0.000151775	0.000215566	0.000296526	15.8947	17.1337	18.6456	0.000265256	0.000357417	0.000466747
RGU295643N0926702E	RGS295643N0926702E	Transitional	Central	0.0247822	17.5251	19.263	21.3836	0.000156352	0.000214821	0.000286164	14.1251	15.863	17.9836	0.000126018	0.000176905	0.000240664	20.9251	22.663	24.7836	0.000186685	0.000252738	0.000331664
RGU295793N0926729E	RGS295793N0926729E	Active	Central	0.038326	14.1306	15.5319	17.2417	0.000194965	0.000267874	0.000356836	10.7306	12.1319	13.8417	0.000148054	0.000209235	0.000286469	17.5306	18.9319	20.6417	0.000241876	0.000326513	0.000427202
RGU295776N0926727E	RGS295776N0926727E	Active	Central	0.12304	18.3006	20.1154	22.3299	0.000810615	0.00111375	0.00148363	14.9006	16.7154	18.9299	0.000660013	0.000925502	0.00125773	21.7006	23.5154	25.7299	0.000961216	0.001302	0.00170954
RGU295861N0926693E	RGS295861N0926693E	Transitional	Central	0.0827283	13.8018	15.1705	16.8406	0.000411049	0.000564765	0.000752325	10.4018	11.7705	13.4406	0.000309789	0.00043819	0.000600436	17.2018	18.5705	20.2406	0.000512308	0.000691339	0.000904214
RGU295833N0926736E	RGS295833N0926736E	Active	Central	0.0205231	11.1239	12.227	13.573	8.21866e-05	0.000112921	0.000150423	7.72387	8.82701	10.173	5.70663e-05	8.15209e-05	0.000112742	14.5239	15.627	16.973	0.000107307	0.000144321	0.000188103
RGU295852N0926785E	RGS295852N0926785E	Active	Central	0.154103	20.4019	22.4251	24.8938	0.00113184	0.0015551	0.00207156	17.0019	19.0251	21.4938	0.000943217	0.00131933	0.00178862	23.8019	25.8251	28.2938	0.00132046	0.00179088	0.00235449
RGU295806N0926859E	RGS295806N0926859E	Active	Central	0.0248983	11.6177	12.7698	14.1756	0.000104134	0.000143076	0.000190592	8.21771	9.36982	10.7756	7.36586e-05	0.000104982	0.000144879	15.0177	16.1698	17.5756	0.00013461	0.000181171	0.000236306
RGU295981N0926726E	RGS295875N0927036E	Active	Central	0.164028	20.3086	22.3226	24.78	0.00119923	0.00164769	0.00219489	16.9086	18.9226	21.38	0.000998456	0.00139673	0.00189374	23.7086	25.7226	28.18	0.0014	0.00189865	0.00249605
RGU295967N0926969E	RGS295875N0927036E	Active	Central	0.012558	30.1521	33.1422	36.7907	0.000136314	0.00018729	0.00024949	26.7521	29.7422	33.3907	0.000120943	0.000168077	0.000226433	33.5521	36.5422	40.1907	0.000151685	0.000206504	0.000272547
RGU295931N0927080E	RGS295931N0927080E	Active	Central	0.121369	10.919	12.0019	13.3231	0.000477084	0.000655495	0.000873187	7.51903	8.60186	9.9231	0.000328528	0.0004698	0.000650353	14.319	15.4019	16.7231	0.00062564	0.00084119	0.00109602
RGU295873N0927023E	RGS295873N0927023E	Active	Central	0.10947	14.8229	16.2929	18.0865	0.00058416	0.000802613	0.00106916	11.4229	12.8929	14.6865	0.000450168	0.000635124	0.000868176	18.2229	19.6929	21.4865	0.000718151	0.000970102	0.00127015
RGU295867N0927046E	RGS295867N0927046E	Active	Central	0.120684	18.5172	20.3535	22.5942	0.000804504	0.00110536	0.00147245	15.1172	16.9535	19.1942	0.000656786	0.00092071	0.00125087	21.9172	23.7535	25.9942	0.000952221	0.00129	0.00169403
RGU295913N0927179E	RGS295913N0927179E	Active	Central	0.138699	13.4936	14.8318	16.4645	0.000673757	0.000925717	0.00123315	10.0936	11.4318	13.0645	0.00050399	0.000713507	0.000978499	16.8936	18.2318	19.8645	0.000843525	0.00113793	0.0014878
RGU295776N0927173E	RGS295776N0927173E	Active	Central	0.0456306	14.5761	16.0216	17.7854	0.000239442	0.000328985	0.000438242	11.1761	12.6216	14.3854	0.000183591	0.00025917	0.000354464	17.9761	19.4216	21.1854	0.000295294	0.000398799	0.000522019
RGU295744N0927075E	RGS295744N0927075E	Active	Central	0.0630925	20.8692	22.9388	25.4641	0.000474009	0.000651271	0.00086756	17.4692	19.5388	22.0641	0.000396784	0.000554739	0.000751722	24.2692	26.3388	28.8641	0.000551235	0.000747802	0.000983398
RGU295640N0927065E	RGS295640N0927065E	Active	Central	0.0325601	33.7638	37.1121	41.1976	0.000395766	0.000543767	0.000724354	30.3638	33.7121	37.7976	0.000355913	0.00049395	0.000664574	37.1638	40.5121	44.5976	0.00043562	0.000593584	0.000784135
RGU295654N0927022E	RGS295654N0927022E	Active	Central	0.0849517	18.4849	20.318	22.5547	0.000565315	0.000776721	0.00103467	15.0849	16.918	19.1547	0.000461334	0.000646745	0.000878702	21.8849	23.718	25.9547	0.000669296	0.000906698	0.00119064
RGU295719N0926896E	RGS295719N0926896E	Active	Central	0.0268894	15.4686	17.0026	18.8743	0.000149739	0.000205735	0.00027406	12.0686	13.6026	15.4743	0.000116826	0.000164594	0.000224691	18.8686	20.4026	22.2743	0.000182651	0.000246876	0.000323429
RGU295597N0926933E	RGS295597N0926933E	Transitional	Central	0.0245981	14.1084	15.5075	17.2147	0.000124935	0.000171655	0.000228663	10.7084	12.1075	13.8147	9.48266e-05	0.00013402	0.000183501	17.5084	18.9075	20.6147	0.000155043	0.000209291	0.000273825
RGU295569N0927030E	RGS295569N0927030E	Active	Central	0.0226488	17.977	19.7598	21.935	0.000146577	0.000201391	0.000268273	14.577	16.3598	18.535	0.000118855	0.000166738	0.00022669	21.377	23.1598	25.335	0.000174299	0.000236043	0.000309856
RGU295610N0927021E	RGS295504N0926894E	Active	Central	0.0688081	19.9772	21.9583	24.3756	0.000494853	0.000679908	0.000905708	16.5772	18.5583	20.9756	0.000410631	0.000574632	0.000779376	23.3772	25.3583	27.7756	0.000579074	0.000785185	0.00103204
RGU295615N0926984E	RGS295504N0926894E	Active	Central	0.060938	18.1719	19.974	22.1728	0.00039865	0.000547729	0.000729632	14.7719	16.574	18.7728	0.000324061	0.000454494	0.000617749	21.5719	23.374	25.5728	0.000473238	0.000640964	0.000841514
RGU295681N0926990E	RGS295681N0926990E	Active	Central	0.0669706	17.6479	19.398	21.5335	0.000425481	0.000584594	0.000778739	14.2479	15.998	18.1335	0.000343508	0.000482129	0.000655781	21.0479	22.798	24.9335	0.000507453	0.000687059	0.000901697
RGU295503N0926897E	RGS295503N0926897E	Active	Central	0.179845	15.4137	16.9423	18.8074	0.000997948	0.00137114	0.0018265	12.0137	13.5423	15.4074	0.000777819	0.00109598	0.00149631	18.8137	20.3423	22.2074	0.00121808	0.0016463	0.0021567
RGU295507N0926875E	RGS295507N0926875E	Active	Central	0.044799	11.5382	12.6824	14.0786	0.000186084	0.000255672	0.000340581	8.13817	9.2824	10.6786	0.00013125	0.000187129	0.00025833	14.9382	16.0824	17.4786	0.000240918	0.000324214	0.000422832
RGU295578N0926824E	RGS295578N0926824E	Active	Central	0.0501821	15.1599	16.6633	18.4977	0.000273873	0.000376291	0.000501258	11.7599	13.2633	15.0977	0.00021245	0.000299512	0.000409124	18.5599	20.0633	21.8977	0.000335296	0.000453069	0.000593392
RGU295550N0927119E	RGS295550N0927119E	Active	Central	0.0242154	16.9496	18.6305	20.6814	0.000147759	0.000203015	0.000270437	13.5496	15.2305	17.2814	0.000118119	0.000165965	0.000225977	20.3496	22.0305	24.0814	0.000177398	0.000240064	0.000314896
RGU294738N0927136E	RGS294738N0927136E	Transitional	Central	0.0236238	12.9546	14.2393	15.8069	0.000110174	0.000151374	0.000201646	9.55463	10.8393	12.4069	8.1258e-05	0.00011523	0.000158273	16.3546	17.6393	19.2069	0.000139089	0.000187519	0.000245019
RGU294785N0927203E	RGS294785N0927203E	Transitional	Central	0.0749058	14.9498	16.4323	18.2413	0.000403137	0.000553894	0.000737844	11.5498	13.0323	14.8413	0.000311452	0.000439288	0.000600317	18.3498	19.8323	21.6413	0.000494821	0.0006685	0.000875371
RGU294816N0927203E	RGS294816N0927203E	Active	Central	0.0964002	22.732	24.9863	27.737	0.000788894	0.00108391	0.00144388	19.332	21.5863	24.337	0.0006709	0.000936417	0.00126689	26.132	28.3863	31.137	0.000906888	0.0012314	0.00162087
RGU294929N0927176E	RGS294929N0927176E	Active	Central	0.0352609	15.7377	17.2984	19.2027	0.000199773	0.000274481	0.000365637	12.3377	13.8984	15.8027	0.000156614	0.000220532	0.000300898	19.1377	20.6984	22.6027	0.000242933	0.00032843	0.000430376
RGU294860N0927045E	RGS294860N0927045E	Transitional	Central	0.0218143	11.4523	12.5881	13.9738	8.9937e-05	0.00012357	0.000164608	8.05234	9.18805	10.5738	6.32363e-05	9.01941e-05	0.000124557	14.8523	15.9881	17.3738	0.000116638	0.000156946	0.000204659
RGU294880N0927051E	RGS294880N0927051E	Transitional	Central	0.0139301	9.25542	10.1733	11.2932	4.64145e-05	6.37717e-05	8.49505e-05	5.85542	6.77327	7.89321	2.9364e-05	4.24586e-05	5.93748e-05	12.6554	13.5733	14.6932	6.3465e-05	8.50848e-05	0.000110526
RGU294919N0927076E	RGS294919N0927076E	Transitional	Central	0.0862745	15.8359	17.4063	19.3225	0.000491844	0.000675774	0.000900201	12.4359	14.0063	15.9225	0.000386244	0.000543774	0.000741801	19.2359	20.8063	22.7225	0.000597444	0.000807774	0.0010586
RGU294950N0927104E	RGS294950N0927104E	Active	Central	0.0398163	19.1836	21.086	23.4073	0.000274975	0.000377805	0.000503275	15.7836	17.686	20.0073	0.00022624	0.000316886	0.000430173	22.5836	24.486	26.8073	0.00032371	0.000438724	0.000576378
RGU294838N0927031E	RGS294838N0927031E	Active	Central	0.229667	18.5863	20.4295	22.6785	0.00153671	0.00211139	0.00281258	15.1863	17.0295	19.2785	0.0012556	0.00176	0.00239092	21.9863	23.8295	26.0785	0.00181783	0.00246278	0.00323425
RGU294816N0927026E	RGS294816N0927026E	Active	Central	0.0223495	11.1748	12.283	13.6352	8.99105e-05	0.000123534	0.000164559	7.77479	8.88299	10.2352	6.25547e-05	8.93387e-05	0.000123526	14.5748	15.683	17.0352	0.000117266	0.000157728	0.000205593
RGU294767N0926997E	RGS295162N0927529E	Active	Central	0.174891	17.7106	19.467	21.61	0.00111507	0.00153207	0.00204087	14.3106	16.067	18.21	0.000901008	0.00126449	0.00171977	21.1106	22.867	25.01	0.00132914	0.00179965	0.00236197
RGU295244N0927313E	RGS295162N0927529E	Active	Central	0.0892443	18.3448	20.164	22.3838	0.00058938	0.000809785	0.00107872	14.9448	16.764	18.9838	0.000480145	0.000673241	0.000914865	21.7448	23.564	25.7838	0.000698615	0.000946329	0.00124257
RGU295193N0927283E	RGS295880N0927252E	Active	Central	0.0552837	18.5351	20.3732	22.616	0.000368888	0.000506837	0.00067516	15.1351	16.9732	19.216	0.00030122	0.000422253	0.000573659	21.9351	23.7732	26.016	0.000436555	0.000591421	0.00077666
RGU295013N0927385E	RGS295880N0927252E	Active	Central	0.0222113	15.2647	16.7785	18.6256	0.000122058	0.000167703	0.000223397	11.8647	13.3785	15.2256	9.48711e-05	0.000133719	0.000182617	18.6647	20.1785	22.0256	0.000149244	0.000201686	0.000264177
RGU295170N0927535E	RGS295880N0927252E	Active	Central	0.0159197	16.5877	18.2326	20.2398	9.50655e-05	0.000130616	0.000173994	13.1877	14.8326	16.8398	7.55798e-05	0.000106259	0.000144766	19.9877	21.6326	23.6398	0.000114551	0.000154974	0.000203223
RGU295103N0927471E	RGS295103N0927471E	Active	Central	0.0316006	16.0966	17.6929	19.6406	0.000183118	0.000251598	0.000335154	12.6966	14.2929	16.2406	0.000144439	0.000203249	0.000277135	19.4966	21.0929	23.0406	0.000221798	0.000299947	0.000393173
RGU295880N0927250E	RGS295880N0927250E	Active	Central	0.0841213	17.046	18.7364	20.7991	0.000516215	0.00070926	0.000944808	13.646	15.3364	17.3991	0.000413251	0.000580554	0.000790361	20.446	22.1364	24.1991	0.00061918	0.000837966	0.00109925
RGU295902N0927261E	RGS295902N0927261E	Active	Central	0.0443581	17.4498	19.1803	21.2918	0.000278654	0.00038286	0.000510009	14.0498	15.7803	17.8918	0.00022436	0.000314992	0.000428568	20.8498	22.5803	24.6918	0.000332949	0.000450728	0.000591451
RGU295884N0927268E	RGS295884N0927268E	Active	Central	0.0786038	16.245	17.8559	19.8216	0.000459689	0.000631595	0.00084135	12.845	14.4559	16.4216	0.000363478	0.000511331	0.000697033	19.645	21.2559	23.2216	0.0005559	0.000751859	0.000985666
RGU295863N0927273E	RGS295863N0927273E	Active	Central	0.0810218	19.0579	20.9479	23.2539	0.000555878	0.000763755	0.0010174	15.6579	17.5479	19.8539	0.000456707	0.000639792	0.000868645	22.4579	24.3479	26.6539	0.000655049	0.000887718	0.00116616
RGU295833N0927454E	RGS295833N0927454E	Active	Central	0.0137653	17.8174	19.5844	21.7403	8.82947e-05	0.000121313	0.000161602	14.4174	16.1844	18.3403	7.14459e-05	0.000100253	0.000136329	21.2174	22.9844	25.1403	0.000105143	0.000142374	0.000186875
RGU295831N0927385E	RGS295831N0927385E	Active	Central	0.259355	22.609	24.8512	27.5869	0.00211096	0.00290037	0.00386359	19.209	21.4512	24.1869	0.0017935	0.00250356	0.00338742	26.009	28.2512	30.9869	0.00242841	0.00329718	0.00433977
RGU295874N0927320E	RGS295874N0927320E	Active	Central	0.0494932	12.2825	13.5006	14.9868	0.000218844	0.000300684	0.000400542	8.88253	10.1006	11.5868	0.000158265	0.000224959	0.000309672	15.6825	16.9006	18.3868	0.000279424	0.000376408	0.000491411
RGU295878N0927379E	RGS295878N0927379E	Active	Central	0.109827	12.6298	13.8822	15.4105	0.000499353	0.000686091	0.000913944	9.22975	10.4822	12.0105	0.000364924	0.000518055	0.000712301	16.0298	17.2822	18.8105	0.000633781	0.000854127	0.00111559
RGU295894N0927356E	RGS295894N0927356E	Active	Central	0.329474	20.1925	22.1949	24.6383	0.00239504	0.00329069	0.00438354	16.7925	18.7949	21.2383	0.00199177	0.0027866	0.00377863	23.5925	25.5949	28.0383	0.00279832	0.00379479	0.00498846
RGU295607N0927376E	RGS295607N0927376E	Active	Central	0.369049	22.875	25.1435	27.9115	0.00303912	0.00417563	0.00556238	19.475	21.7435	24.5115	0.0025874	0.00361099	0.0048848	26.275	28.5435	31.3115	0.00349084	0.00474028	0.00623995
RGU295574N0927451E	RGS295574N0927451E	Active	Central	0.0847609	17.5472	19.2873	21.4106	0.000535434	0.000735665	0.000979982	14.1472	15.8873	18.0106	0.000431686	0.000605981	0.000824361	20.9472	22.6873	24.8106	0.000639181	0.000865349	0.0011356
RGU295597N0927445E	RGS295597N0927445E	Active	Central	0.0706641	15.5605	17.1037	18.9865	0.000395846	0.000543877	0.0007245	12.1605	13.7037	15.5865	0.000309353	0.000435761	0.000594761	18.9605	20.5037	22.3865	0.000482339	0.000651993	0.000854239
RGU295710N0927563E	RGS295710N0927563E	Transitional	Central	0.17482	13.9266	15.3077	16.9928	0.000876472	0.00120424	0.00160417	10.5266	11.9077	13.5928	0.000662492	0.000936764	0.0012832	17.3266	18.7077	20.3928	0.00109045	0.00147171	0.00192514
RGU295706N0927630E	RGS295706N0927630E	Transitional	Central	0.0880274	17.7755	19.5383	21.6891	0.000563303	0.000773956	0.00103099	14.3755	16.1383	18.2891	0.000455557	0.000639274	0.000869371	21.1755	22.9383	25.0891	0.000671048	0.000908638	0.00119261
RGU295710N0927485E	RGS295710N0927485E	Active	Central	0.0263244	15.0592	16.5526	18.3748	0.000142713	0.000196082	0.000261201	11.6592	13.1526	14.9748	0.000110492	0.000155805	0.00021287	18.4592	19.9526	21.7748	0.000174934	0.000236358	0.000309533
RGU295777N0927699E	RGS295302N0927690E	Active	Central	0.119671	17.7791	19.5422	21.6936	0.000765954	0.00105239	0.00140189	14.3791	16.1422	18.2936	0.000619476	0.000869294	0.00118218	21.1791	22.9422	25.0936	0.000912432	0.00123549	0.00162161
RGU295787N0927540E	RGS295302N0927690E	Active	Central	0.125833	15.4338	16.9644	18.8319	0.000699151	0.000960606	0.00127963	12.0338	13.5644	15.4319	0.000545131	0.000768081	0.0010486	18.8338	20.3644	22.2319	0.00085317	0.00115313	0.00151066
RGU295443N0927481E	RGS295443N0927481E	Active	Central	0.257037	11.9922	13.1815	14.6326	0.00110968	0.00152466	0.002031	8.5922	9.78146	11.2326	0.000795066	0.00113139	0.00155908	15.3922	16.5815	18.0326	0.00142429	0.00191792	0.00250292
RGU295404N0927693E	RGS295404N0927693E	Active	Central	0.199508	19.286	21.1986	23.5323	0.00138518	0.00190319	0.00253524	15.886	17.7986	20.1323	0.00114098	0.00159794	0.00216894	22.686	24.5986	26.9323	0.00162938	0.00220843	0.00290154
RGU295302N0927687E	RGS295302N0927687E	Active	Central	0.296755	23.3092	25.6208	28.4413	0.00249017	0.00342139	0.00455765	19.9092	22.2208	25.0413	0.00212694	0.00296736	0.00401281	26.7092	29.0208	31.8413	0.00285339	0.00387543	0.00510249
RGU295330N0927670E	RGS295330N0927670E	Active	Central	0.0914714	21.0012	23.0839	25.6251	0.000691565	0.000950183	0.00126574	17.6012	19.6839	22.2251	0.000579604	0.000810232	0.0010978	24.4012	26.4839	29.0251	0.000803526	0.00109013	0.00143368
RGU296062N0927318E	RGS296062N0927318E	Active	Central	0.0166146	9.69936	10.6612	11.8349	5.80142e-05	7.97093e-05	0.000106181	6.29936	7.26123	8.43489	3.7678e-05	5.4289e-05	7.56767e-05	13.0994	14.0612	15.2349	7.83504e-05	0.00010513	0.000136685
RGU296058N0927595E	RGS296058N0927595E	Active	Central	0.0363933	19.8269	21.7931	24.1922	0.000259764	0.000356905	0.000475435	16.4269	18.3931	20.7922	0.000215218	0.000301224	0.000408617	23.2269	25.1931	27.5922	0.000304309	0.000412587	0.000542253
RGU296012N0927548E	RGS296012N0927548E	Active	Central	0.189847	19.7745	21.7355	24.1283	0.00135149	0.00185689	0.00247357	16.3745	18.3355	20.7283	0.00111912	0.00156643	0.00212501	23.1745	25.1355	27.5283	0.00158386	0.00214736	0.00282213
RGU295990N0927472E	RGS295990N0927472E	Active	Central	0.0691638	14.0633	15.4579	17.1596	0.000350161	0.000481107	0.000640884	10.6633	12.0579	13.7596	0.000265504	0.000375286	0.0005139	17.4633	18.8579	20.5596	0.000434817	0.000586928	0.000767869
RGU295454N0927257E	RGS295454N0927257E	Active	Central	0.0737559	11.3651	12.4922	13.8674	0.000301769	0.000414618	0.000552315	7.96514	9.09221	10.4674	0.000211491	0.000301772	0.000416899	14.7651	15.8922	17.2674	0.000392046	0.000527465	0.000687731
RGU295437N0927350E	RGS295437N0927350E	Active	Central	0.0538165	14.8056	16.2739	18.0654	0.000286843	0.000394111	0.000524997	11.4056	12.8739	14.6654	0.000220971	0.000311772	0.000426189	18.2056	19.6739	21.4654	0.000352714	0.00047645	0.000623804
RGU295462N0927304E	RGS295462N0927304E	Active	Central	0.0156155	8.04501	8.84283	9.8163	4.52257e-05	6.21384e-05	8.27748e-05	4.64501	5.44283	6.4163	2.61123e-05	3.82467e-05	5.41047e-05	11.445	12.2428	13.2163	6.43391e-05	8.60301e-05	0.000111445
RGU295418N0927456E	RGS295418N0927456E	Transitional	Central	0.0899115	16.766	18.4287	20.4574	0.000542685	0.000745628	0.000993254	13.366	15.0287	17.0574	0.000432633	0.000608064	0.000828176	20.166	21.8287	23.8574	0.000652737	0.000883193	0.00115833
RGU295447N0927461E	RGS295447N0927461E	Active	Central	0.0400684	12.7145	13.9754	15.5139	0.000183402	0.000251988	0.000335674	9.31453	10.5754	12.1139	0.000134359	0.000190683	0.000262108	16.1145	17.3754	18.9139	0.000232446	0.000313292	0.000409239
RGU295460N0927601E	RGS295460N0927601E	Transitional	Central	0.0707466	11.7521	12.9176	14.3396	0.000299312	0.000411244	0.000547819	8.35212	9.51757	10.9396	0.000212718	0.000303001	0.000417928	15.1521	16.3176	17.7396	0.000385906	0.000519486	0.00067771
RGU295488N0927499E	RGS295488N0927499E	Active	Central	0.0185932	12.2641	13.4803	14.9643	8.20904e-05	0.000112789	0.000150247	8.8641	10.0803	11.5643	5.93323e-05	8.43414e-05	0.00011611	15.6641	16.8803	18.3643	0.000104848	0.000141237	0.000184384
RGU295097N0927605E	RGS295097N0927605E	Active	Central	0.0222848	14.1653	15.57	17.2841	0.000113641	0.000156139	0.000207993	10.7653	12.17	13.8841	8.63647e-05	0.000122043	0.000167078	17.5653	18.97	20.6841	0.000140918	0.000190234	0.000248908
RGU295019N0927536E	RGS295019N0927536E	Active	Central	0.203278	17.0673	18.7599	20.8251	0.00124899	0.00171606	0.00228597	13.6673	15.3599	17.4251	0.00100018	0.00140505	0.00191276	20.4673	22.1599	24.2251	0.0014978	0.00202708	0.00265919
RGU295052N0927492E	RGS295052N0927492E	Transitional	Central	0.114542	12.3132	13.5343	15.0242	0.000507738	0.000697612	0.000929291	8.91322	10.1343	11.6242	0.000367538	0.000522362	0.000718992	15.7132	16.9343	18.4242	0.000647937	0.000872861	0.00113959
RGU295044N0927490E	RGS295044N0927490E	Active	Central	0.0266707	10.9753	12.0638	13.3918	0.000105379	0.000144787	0.000192871	7.57534	8.66375	9.9918	7.27341e-05	0.000103981	0.000143904	14.3753	15.4638	16.7918	0.000138024	0.000185593	0.000241838
RGU295050N0927464E	RGS295050N0927464E	Active	Central	0.0568329	11.0696	12.1673	13.5068	0.000226482	0.000311177	0.00041452	7.66956	8.76732	10.1068	0.000156918	0.000224223	0.000310175	14.4696	15.5673	16.9068	0.000296045	0.000398131	0.000518865
RGU294891N0927510E	RGS294891N0927510E	Active	Central	0.113452	16.1418	17.7426	19.6958	0.000659277	0.000905821	0.00120665	12.7418	14.3426	16.2958	0.000520412	0.000732239	0.000998349	19.5418	21.1426	23.0958	0.000798142	0.0010794	0.00141494
RGU294970N0927567E	RGS294970N0927567E	Active	Central	0.0681459	16.8438	18.5142	20.5523	0.000413221	0.000567749	0.000756301	13.4438	15.1142	17.1523	0.00032981	0.000463486	0.000631185	20.2438	21.9142	23.9523	0.000496631	0.000672013	0.000881417
RGU294915N0927615E	RGS294915N0927615E	Transitional	Central	0.0515958	14.2554	15.6691	17.3941	0.000264787	0.000363808	0.000484629	10.8554	12.2691	13.9941	0.000201634	0.000284866	0.000389899	17.6554	19.0691	20.7941	0.000327941	0.000442749	0.000579359
RGU294976N0927680E	RGS294976N0927680E	Active	Central	0.0388482	15.2232	16.7329	18.5749	0.000212902	0.000292519	0.000389665	11.8232	13.3329	15.1749	0.000165351	0.000233081	0.00031834	18.6232	20.1329	21.9749	0.000260452	0.000351956	0.00046099
RGU295003N0927687E	RGS295003N0927687E	Active	Central	0.0630131	13.7343	15.0963	16.7582	0.000311559	0.00042807	0.000570233	10.3343	11.6963	13.3582	0.000234431	0.00033166	0.000454541	17.1343	18.4963	20.1582	0.000388687	0.00052448	0.000685925
RGU295068N0927697E	RGS295068N0927697E	Active	Central	0.0938249	15.2434	16.755	18.5995	0.000514874	0.000707417	0.000942352	11.8434	13.355	15.1995	0.000400032	0.000563865	0.00077009	18.6434	20.155	21.9995	0.000629716	0.000850969	0.00111461
RGU295042N0927678E	RGS295042N0927678E	Active	Central	0.124456	19.8603	21.8298	24.2329	0.000889821	0.00122258	0.0016286	16.4603	18.4298	20.8329	0.000737487	0.00103216	0.0014001	23.2603	25.2298	27.6329	0.00104216	0.001413	0.0018571
RGU294803N0927676E	RGS294803N0927676E	Active	Central	0.198539	16.9867	18.6712	20.7267	0.00121411	0.00166814	0.00222213	13.5867	15.2712	17.3267	0.000971095	0.00136437	0.00185761	20.3867	22.0712	24.1267	0.00145712	0.0019719	0.00258665
RGU294731N0927488E	RGS294731N0927488E	Active	Central	0.158863	15.0287	16.5191	18.3377	0.000859505	0.00118093	0.00157312	11.6287	13.1191	14.9377	0.000665057	0.000937866	0.00128144	18.4287	19.9191	21.7377	0.00105395	0.00142399	0.00186479
RGU294724N0927557E	RGS294724N0927557E	Active	Central	0.0484278	13.6387	14.9913	16.6416	0.000237778	0.000326697	0.000435195	10.2387	11.5913	13.2416	0.000178502	0.000252603	0.000346281	17.0387	18.3913	20.0416	0.000297053	0.000400792	0.000524108
RGU294799N0927404E	RGS294799N0927404E	Transitional	Central	0.0427721	13.5399	14.8826	16.521	0.000208487	0.000286452	0.000381584	10.1399	11.4826	13.121	0.000156133	0.000221011	0.000303055	16.9399	18.2826	19.921	0.00026084	0.000351894	0.000460114
RGU294753N0927361E	RGS294753N0927361E	Transitional	Central	0.017766	10.4636	11.5012	12.7674	6.69227e-05	9.19492e-05	0.000122486	7.06358	8.10125	9.36737	4.51771e-05	6.47671e-05	8.98674e-05	13.8636	14.9012	16.1674	8.86683e-05	0.000119131	0.000155104
RGU294820N0927325E	RGS294820N0927325E	Transitional	Central	0.0300143	11.5646	12.7114	14.1108	0.000124957	0.000171686	0.000228704	8.16459	9.31144	10.7108	8.82195e-05	0.000125764	0.000173597	14.9646	16.1114	17.5108	0.000161694	0.000217608	0.00028381
RGU294853N0927281E	RGS294853N0927281E	Active	Central	0.0455136	13.7318	15.0935	16.7551	0.000224994	0.000309132	0.000411796	10.3318	11.6935	13.3551	0.000169285	0.000239497	0.000328233	17.1318	18.4935	20.1551	0.000280702	0.000378768	0.000495359
RGU294797N0927298E	RGS294797N0927298E	Active	Central	0.0498336	18.9319	20.8094	23.1002	0.00033964	0.000466652	0.000621629	15.5319	17.4094	19.7002	0.000278644	0.000390407	0.000530135	22.3319	24.2094	26.5002	0.000400636	0.000542898	0.000713124
RGU294772N0927298E	RGS294772N0927298E	Active	Central	0.0181201	11.193	12.303	13.6574	7.30149e-05	0.00010032	0.000133636	7.79302	8.90302	10.2574	5.08358e-05	7.25958e-05	0.000100367	14.593	15.703	17.0574	9.51939e-05	0.000128043	0.000166905
RGU294748N0927308E	RGS294748N0927308E	Active	Central	0.0730389	24.2599	26.6657	29.6013	0.00063789	0.000876436	0.0011675	20.8599	23.2657	26.2013	0.00054849	0.000764687	0.0010334	27.6599	30.0657	33.0013	0.00072729	0.000988186	0.0013016
RGU294861N0927208E	RGS294861N0927208E	Active	Central	0.188189	14.5056	15.9441	17.6993	0.000982726	0.00135023	0.00179864	11.1056	12.5441	14.2993	0.000752383	0.0010623	0.00145313	17.9056	19.3441	21.0993	0.00121307	0.00163816	0.00214416
RGU295746N0927713E	RGS295746N0927713E	Active	Central	0.149535	13.0851	14.3828	15.9661	0.000704406	0.000967826	0.00128924	9.68512	10.9828	12.5661	0.000521375	0.000739038	0.0010147	16.4851	17.7828	19.3661	0.000887437	0.00119661	0.00156379
RGU295807N0927762E	RGS295807N0927762E	Active	Central	0.403646	14.6817	16.1376	17.9141	0.00213343	0.00293125	0.00390473	11.2817	12.7376	14.5141	0.00163937	0.00231367	0.00316363	18.0817	19.5376	21.3141	0.00262749	0.00354883	0.00464582
RGU295842N0927765E	RGS295842N0927765E	Active	Central	0.103671	14.0941	15.4919	17.1973	0.000526016	0.000722726	0.000962746	10.6941	12.0919	13.7973	0.000399123	0.000564109	0.000772406	17.4941	18.8919	20.5973	0.00065291	0.000881343	0.00115309
RGU295506N0927765E	RGS295506N0927765E	Active	Central	0.0797699	17.1884	18.8929	20.9728	0.000493601	0.000678189	0.000903418	13.7884	15.4929	17.5728	0.000395963	0.000556141	0.000756961	20.5884	22.2929	24.3728	0.00059124	0.000800237	0.00104988
RGU295589N0927828E	RGS295589N0927828E	Transitional	Central	0.082254	10.3163	11.3394	12.5877	0.000305482	0.00041972	0.000559111	6.91634	7.9394	9.18771	0.000204803	0.000293871	0.000408092	13.7163	14.7394	15.9877	0.000406161	0.000545569	0.000710129
RGU295295N0927764E	RGS295295N0927764E	Active	Central	0.0836134	13.765	15.13	16.7957	0.000414337	0.000569283	0.000758344	10.365	11.73	13.3957	0.000311994	0.000441355	0.00060483	17.165	18.53	20.1957	0.00051668	0.000697212	0.000911858
RGU295362N0928009E	RGS295362N0928009E	Active	Central	0.0621666	12.5899	13.8384	15.3619	0.000281762	0.00038713	0.000515697	9.18991	10.4384	11.9619	0.00020567	0.000292015	0.000401559	15.9899	17.2384	18.7619	0.000357854	0.000482245	0.000629835
RGU295310N0928015E	RGS295310N0928015E	Active	Central	0.0242754	14.4742	15.9096	17.661	0.000126492	0.000173795	0.000231513	11.0742	12.5096	14.261	9.6779e-05	0.000136654	0.000186943	17.8742	19.3096	21.061	0.000156205	0.000210937	0.000276083
RGU295918N0927906E	RGS295918N0927906E	Active	Central	0.0522962	12.9153	14.1961	15.7589	0.000243151	0.00033408	0.00044503	9.51528	10.7961	12.3589	0.000179141	0.000254067	0.000349014	16.3153	17.5961	19.1589	0.000307162	0.000414094	0.000541045
RGU295899N0927921E	RGS295899N0927921E	Active	Central	0.140522	22.6544	24.901	27.6423	0.00114604	0.00157461	0.00209754	19.2544	21.501	24.2423	0.000974038	0.00135961	0.00183955	26.0544	28.301	31.0423	0.00131803	0.00178961	0.00235554
RGU295689N0928035E	RGS295689N0928035E	Active	Central	0.10115	15.2341	16.7448	18.5882	0.000554736	0.000762185	0.00101531	11.8341	13.3448	15.1882	0.000430928	0.000607425	0.000829598	18.6341	20.1448	21.9882	0.000678544	0.000916945	0.00120102
RGU295698N0928015E	RGS295698N0928015E	Active	Central	0.0512419	12.5798	13.8273	15.3495	0.00023206	0.000318841	0.000424729	9.17977	10.4273	11.9495	0.00016934	0.000240441	0.000330649	15.9798	17.2273	18.7495	0.00029478	0.000397241	0.000518809
RGU295702N0927993E	RGS295702N0927993E	Active	Central	0.0628973	16.4691	18.1024	20.0952	0.000372911	0.000512366	0.000682524	13.0691	14.7024	16.6952	0.000295925	0.000416133	0.000567044	19.8691	21.5024	23.4952	0.000449898	0.000608598	0.000798003
RGU295585N0927978E	RGS295585N0927978E	Active	Central	0.0708895	13.0648	14.3604	15.9413	0.000333417	0.000458102	0.000610239	9.66481	10.9604	12.5413	0.000246648	0.000349641	0.000480086	16.4648	17.7604	19.3413	0.000420186	0.000566563	0.000740392
RGU295388N0927942E	RGS295388N0927942E	Transitional	Central	0.0212416	15.2141	16.7229	18.5639	0.000116342	0.00015985	0.000212937	11.8141	13.3229	15.1639	9.03427e-05	0.00012735	0.000173937	18.6141	20.1229	21.9639	0.000142342	0.00019235	0.000251936
RGU295449N0927898E	RGS295449N0927898E	Transitional	Central	0.0206842	9.67085	10.6299	11.8001	7.20123e-05	9.89421e-05	0.000131801	6.27085	7.2299	8.4001	4.66948e-05	6.72952e-05	9.38248e-05	13.0708	14.0299	15.2001	9.73298e-05	0.000130589	0.000169777
RGU294981N0927750E	RGS294981N0927750E	Transitional	Central	0.074397	16.571	18.2143	20.2195	0.00044382	0.000609792	0.000812305	13.171	14.8143	16.8195	0.000352758	0.000495964	0.000675712	19.971	21.6143	23.6195	0.000534882	0.000723619	0.000948898
RGU295062N0927774E	RGS294927N0928008E	Active	Central	0.141369	14.9877	16.474	18.2875	0.000762763	0.00104801	0.00139605	11.5877	13.074	14.8875	0.000589728	0.000831713	0.0011365	18.3877	19.874	21.6875	0.000935799	0.0012643	0.00165561
RGU295097N0927703E	RGS294927N0928008E	Active	Central	0.0245448	13.3216	14.6426	16.2546	0.000117711	0.00016173	0.000215442	9.92156	11.2426	12.8546	8.76682e-05	0.000124177	0.000170377	16.7216	18.0426	19.6546	0.000147754	0.000199284	0.000260506
RGU295263N0927892E	RGS294927N0928008E	Active	Central	0.0469164	10.0211	11.0149	12.2275	0.000169256	0.000232552	0.000309783	6.62115	7.61493	8.82753	0.000111831	0.000160769	0.000223644	13.4211	14.4149	15.6275	0.000226682	0.000304334	0.000395921
RGU295207N0927906E	RGS294927N0928008E	Active	Central	0.0590491	17.8809	19.6542	21.8178	0.000380108	0.000522253	0.000695695	14.4809	16.2542	18.4178	0.000307831	0.000431908	0.000587281	21.2809	23.0542	25.2178	0.000452384	0.000612598	0.000804109
RGU294918N0928025E	RGS294927N0928008E	Active	Central	0.0274032	25.9089	28.4783	31.6134	0.000255595	0.000351178	0.000467805	22.5089	25.0783	28.2134	0.000222054	0.000309251	0.000417493	29.3089	31.8783	35.0134	0.000289137	0.000393105	0.000518117
RGU294927N0928011E	RGS294927N0928008E	Active	Central	0.074595	23.1589	25.4555	28.2578	0.000621912	0.000854484	0.00113826	19.7589	22.0555	24.8578	0.000530608	0.000740353	0.0010013	26.5589	28.8555	31.6578	0.000713217	0.000968614	0.00127522
RGU294919N0927996E	RGS294919N0927996E	Transitional	Central	0.0951401	15.244	16.7557	18.6003	0.000522113	0.000717363	0.000955602	11.844	13.3557	15.2003	0.000405662	0.000571799	0.000780925	18.644	20.1557	22.0003	0.000638565	0.000862928	0.00113028
RGU294913N0927968E	RGS294913N0927968E	Transitional	Central	0.0387775	16.7991	18.465	20.4978	0.000234513	0.000322212	0.00042922	13.3991	15.065	17.0978	0.00018705	0.000262882	0.000358024	20.1991	21.865	23.8978	0.000281977	0.000381541	0.000500415
RGU294903N0927960E	RGS294903N0927960E	Transitional	Central	0.0559806	17.3101	19.0267	21.1213	0.000348851	0.000479308	0.000638487	13.9101	15.6267	17.7213	0.000280331	0.000393657	0.000535707	20.7101	22.4267	24.5213	0.000417371	0.000564958	0.000741268
RGU294899N0927946E	RGS294899N0927946E	Transitional	Central	0.0640412	13.6533	15.0073	16.6594	0.000314775	0.000432488	0.000576119	10.2533	11.6073	13.2594	0.000236388	0.000334505	0.000458539	17.0533	18.4073	20.0594	0.000393161	0.000530471	0.000693699
RGU294930N0927847E	RGS294930N0927847E	Transitional	Central	0.0249499	11.6622	12.8188	14.2299	0.00010475	0.000143922	0.000191719	8.26223	9.41876	10.8299	7.42109e-05	0.000105749	0.000145911	15.0622	16.2188	17.6299	0.000135288	0.000182095	0.000237527
RGU294903N0927829E	RGS294903N0927829E	Active	Central	0.0344772	14.8294	16.3	18.0944	0.000184059	0.00025289	0.000336876	11.4294	12.9	14.6944	0.000141859	0.00020014	0.000273575	18.2294	19.7	21.4944	0.000226259	0.00030564	0.000400176
RGU294870N0927811E	RGS294870N0927811E	Active	Central	0.0234115	11.6187	12.7709	14.1768	9.79236e-05	0.000134543	0.000179226	8.21866	9.37087	10.7768	6.9268e-05	9.87237e-05	0.000136242	15.0187	16.1709	17.5768	0.000126579	0.000170363	0.000222209
RGU294848N0927800E	RGS294848N0927800E	Transitional	Central	0.0375297	19.0351	20.9228	23.2261	0.000257177	0.000353352	0.000470701	15.6351	17.5228	19.8261	0.000211241	0.000295931	0.000401797	22.4351	24.3228	26.6261	0.000303114	0.000410772	0.000539606
RGU294827N0927788E	RGS294827N0927788E	Active	Central	0.0340393	16.4078	18.0349	20.0203	0.000201063	0.000276253	0.000367998	13.0078	14.6349	16.6203	0.000159399	0.000224173	0.000305502	19.8078	21.4349	23.4203	0.000242727	0.000328333	0.000430494
RGU294749N0927793E	RGS294749N0927793E	Active	Central	0.01918	26.805	29.4632	32.7067	0.000185083	0.000254297	0.00033875	23.405	26.0632	29.3067	0.000161607	0.000224952	0.000303536	30.205	32.8632	36.1067	0.00020856	0.000283643	0.000373965
RGU294902N0927719E	RGS294902N0927719E	Active	Central	0.0809162	23.264	25.5711	28.3861	0.000677676	0.000931101	0.00124032	19.864	22.1711	24.9861	0.000578635	0.000807299	0.00109176	26.664	28.9711	31.7861	0.000776718	0.0010549	0.00138888
RGU294861N0927793E	RGS294861N0927793E	Transitional	Central	0.100952	13.1427	14.446	16.0363	0.000477639	0.000656258	0.000874203	9.74268	11.046	12.6363	0.000354074	0.000501802	0.000688856	16.5427	17.846	19.4363	0.000601204	0.000810714	0.00105955
RGU294752N0927878E	RGS294752N0927878E	Transitional	Central	0.221589	18.1445	19.9438	22.1394	0.00144742	0.0019887	0.00264916	14.7445	16.5438	18.7394	0.0011762	0.00164967	0.00224232	21.5445	23.3438	25.5394	0.00171865	0.00232773	0.00305599
RGU294750N0927899E	RGS294750N0927899E	Transitional	Central	0.191875	17.6656	19.4175	21.5551	0.00122025	0.00167658	0.00223338	14.2656	16.0175	18.1551	0.000985398	0.00138301	0.0018811	21.0656	22.8175	24.9551	0.00145511	0.00197015	0.00258566
RGU294749N0927956E	RGS294749N0927956E	Active	Central	0.0142263	13.572	14.918	16.5602	6.95089e-05	9.55025e-05	0.000127219	10.172	11.518	13.1602	5.20958e-05	7.37362e-05	0.0001011	16.972	18.318	19.9602	8.69219e-05	0.000117269	0.000153339
RGU295987N0928224E	RGS295987N0928224E	Active	Central	0.122624	19.1112	21.0064	23.3189	0.000843652	0.00115914	0.0015441	15.7112	17.6064	19.9189	0.00069356	0.000971531	0.00131896	22.5112	24.4064	26.7189	0.000993743	0.00134676	0.00176924
RGU296049N0928283E	RGS296049N0928283E	Transitional	Central	0.0740068	13.257	14.5717	16.1759	0.0003532	0.000485283	0.000646447	9.85703	11.1717	12.7759	0.000262615	0.000372052	0.00051057	16.657	17.9717	19.5759	0.000443784	0.000598513	0.000782323
RGU296053N0928386E	RGS296053N0928386E	Active	Central	0.118209	19.1262	21.0229	23.3373	0.00081392	0.00111829	0.00148968	15.7262	17.6229	19.9373	0.000669232	0.000937435	0.00127265	22.5262	24.4229	26.7373	0.000958607	0.00129915	0.00170671
RGU295734N0928060E	RGS295587N0928191E	Active	Central	0.168175	19.3262	21.2427	23.5812	0.00117007	0.00160763	0.00214152	15.9262	17.8427	20.1812	0.00096422	0.00135032	0.00183275	22.7262	24.6427	26.9812	0.00137591	0.00186493	0.00245029
RGU295789N0928059E	RGS295587N0928191E	Active	Central	0.226136	18.5278	20.3652	22.6071	0.00150833	0.00207239	0.00276064	15.1278	16.9652	19.2071	0.00123154	0.0017264	0.00234545	21.9278	23.7652	26.0071	0.00178512	0.00241838	0.00317582
RGU295850N0928065E	RGS295850N0928065E	Transitional	Central	0.0375973	15.3173	16.8363	18.6897	0.00020732	0.000284849	0.000379449	11.9173	13.4363	15.2897	0.000161301	0.000227325	0.00031042	18.7173	20.2363	22.0897	0.000253339	0.000342373	0.000448477
RGU295528N0928265E	RGS295528N0928265E	Transitional	Central	0.0399582	13.3077	14.6274	16.2377	0.00019143	0.000263018	0.000350367	9.90768	11.2274	12.8377	0.000142522	0.000201882	0.000277004	16.7077	18.0274	19.6377	0.000240339	0.000324154	0.00042373
RGU295594N0928191E	RGS295594N0928191E	Transitional	Central	0.0285892	33.4256	36.7404	40.785	0.00034402	0.00047267	0.000629645	30.0256	33.3404	37.385	0.000309027	0.000428929	0.000577156	36.8256	40.1404	44.185	0.000379013	0.000516412	0.000682135
RGU295528N0928225E	RGS295528N0928225E	Transitional	Central	0.0471204	11.8537	13.0292	14.4636	0.000201078	0.000276274	0.000368025	8.4537	9.62922	11.0636	0.000143403	0.00020418	0.000281512	15.2537	16.4292	17.8636	0.000258754	0.000348368	0.000454538
RGU295587N0928123E	RGS295587N0928123E	Active	Central	0.015062	12.014	13.2054	14.6591	6.51435e-05	8.95047e-05	0.000119229	8.61398	9.80539	11.2591	4.67077e-05	6.64599e-05	9.15757e-05	15.414	16.6054	18.0591	8.35794e-05	0.000112549	0.000146883
RGU295560N0928109E	RGS295560N0928109E	Active	Central	0.167896	15.6186	17.1674	19.0573	0.000944027	0.00129706	0.00172781	12.2186	13.7674	15.6573	0.000738522	0.00104017	0.00141956	19.0186	20.5674	22.4573	0.00114953	0.00155394	0.00203607
RGU295544N0928096E	RGS295544N0928096E	Active	Central	0.190558	17.5169	19.254	21.3736	0.00120167	0.00165105	0.00219937	14.1169	15.854	17.9736	0.000968428	0.0013595	0.0018495	20.9169	22.654	24.7736	0.00143491	0.0019426	0.00254923
RGU295510N0928091E	RGS295510N0928091E	Active	Central	0.252816	15.6091	17.1571	19.0458	0.00142065	0.00195191	0.00260015	12.2091	13.7571	15.6458	0.0011112	0.0015651	0.00213598	19.0091	20.5571	22.4458	0.00173009	0.00233872	0.00306432
RGU295427N0928144E	RGS295427N0928144E	Active	Central	0.107177	16.8911	18.5662	20.6101	0.000651725	0.000895445	0.00119283	13.4911	15.1662	17.2101	0.00052054	0.000731464	0.000996048	20.2911	21.9662	24.0101	0.000782911	0.00105943	0.0013896
RGU295219N0928094E	RGS295219N0928094E	Active	Central	0.051497	12.9672	14.2532	15.8223	0.000240398	0.000330298	0.000439991	9.56723	10.8532	12.4223	0.000177366	0.000251507	0.000345442	16.3672	17.6532	19.2223	0.00030343	0.000409088	0.000534539
RGU295127N0928165E	RGS295127N0928165E	Active	Central	0.0341576	13.9384	15.3207	17.0073	0.000171397	0.000235493	0.0003137	10.5384	11.9207	13.6073	0.000129588	0.000183231	0.000250987	17.3384	18.7207	20.4073	0.000213206	0.000287754	0.000376414
RGU295239N0928159E	RGS295239N0928159E	Active	Central	0.205582	22.2423	24.4481	27.1394	0.00164615	0.00226174	0.00301287	18.8423	21.0481	23.7394	0.00139451	0.0019472	0.00263542	25.6423	27.8481	30.5394	0.00189778	0.00257628	0.00339032
RGU295303N0928178E	RGS295303N0928178E	Active	Central	0.112461	23.5453	25.8803	28.7294	0.000953252	0.00130973	0.0017447	20.1453	22.4803	25.3294	0.0008156	0.00113767	0.00153822	26.9453	29.2803	32.1294	0.0010909	0.0014818	0.00195117
RGU295328N0928231E	RGS295328N0928231E	Active	Central	0.0548163	13.0765	14.3733	15.9556	0.00025805	0.000354551	0.000472298	9.67649	10.9733	12.5556	0.000190955	0.000270682	0.000371655	16.4765	17.7733	19.3556	0.000325145	0.000438419	0.000572941
RGU295372N0928342E	RGS295372N0928342E	Active	Central	0.360863	16.8253	18.4938	20.5298	0.00218579	0.00300319	0.00400056	13.4253	15.0938	17.1298	0.00174409	0.00245107	0.00333801	20.2253	21.8938	23.9298	0.00262748	0.00355531	0.0046631
RGU295656N0928355E	RGS295656N0928355E	Active	Central	0.0668578	11.9832	13.1716	14.6216	0.000288421	0.000396279	0.000527885	8.58319	9.77155	11.2216	0.000206587	0.000293987	0.000405134	15.3832	16.5716	18.0216	0.000370255	0.000498572	0.000650636
RGU295701N0928278E	RGS295701N0928278E	Active	Central	0.0273058	11.3798	12.5083	13.8853	0.000111864	0.000153697	0.000204741	7.97982	9.10834	10.4853	7.84422e-05	0.00011192	0.000154607	14.7798	15.9083	17.2853	0.000145287	0.000195475	0.000254874
RGU295152N0928384E	RGS295152N0928384E	Active	Central	0.0309295	13.018	14.309	15.8842	0.000144951	0.000199157	0.000265297	9.61804	10.909	12.4842	0.000107093	0.000151835	0.000208511	16.418	17.709	19.2842	0.000182808	0.000246479	0.000322084
RGU294743N0928201E	RGS294743N0928201E	Active	Central	0.024871	9.05034	9.94785	11.043	8.10329e-05	0.000111336	0.000148311	5.65034	6.54785	7.64297	5.05907e-05	7.32833e-05	0.000102648	12.4503	13.3479	14.443	0.000111475	0.000149389	0.000193974
RGU294792N0928202E	RGS294792N0928202E	Active	Central	0.0660739	12.124	13.3264	14.7934	0.00028839	0.000396236	0.000527828	8.72404	9.92636	11.3934	0.000207515	0.000295143	0.000406516	15.524	16.7264	18.1934	0.000369264	0.00049733	0.00064914
RGU294805N0928191E	RGS294805N0928191E	Active	Central	0.119859	15.2074	16.7155	18.5557	0.000656192	0.000901582	0.001201	11.8074	13.3155	15.1557	0.000509484	0.000718197	0.000980938	18.6074	20.1155	21.9557	0.000802899	0.00108497	0.00142106
RGU294764N0928267E	RGS294764N0928267E	Active	Central	0.0226272	9.89337	10.8745	12.0716	8.05894e-05	0.000110727	0.000147499	6.49337	7.47449	8.67162	5.28937e-05	7.6107e-05	0.000105956	13.2934	14.2745	15.4716	0.000108285	0.000145346	0.000189043
RGU296078N0928524E	RGS296078N0928524E	Active	Central	0.0124013	13.2027	14.512	16.1096	5.89429e-05	8.09853e-05	0.000107881	9.80271	11.112	12.7096	4.37638e-05	6.20114e-05	8.51121e-05	16.6027	17.912	19.5096	7.41221e-05	9.99593e-05	0.00013065
RGU295082N0928489E	RGS295082N0928489E	Active	Central	0.072186	18.8932	20.7668	23.053	0.000490977	0.000674583	0.000898614	15.4932	17.3668	19.653	0.000402621	0.000564139	0.000766081	22.2932	24.1668	26.453	0.000579332	0.000785028	0.00103115
RGU295138N0928538E	RGS295138N0928538E	Active	Central	0.0459841	9.89229	10.8733	12.0703	0.00016376	0.000225	0.000299723	6.49229	7.4733	8.6703	0.000107475	0.000154644	0.000215296	13.2923	14.2733	15.4703	0.000220044	0.000295355	0.00038415
RGU295183N0928514E	RGS295183N0928514E	Transitional	Central	0.150023	18.52	20.3566	22.5976	0.00100023	0.00137428	0.00183069	15.12	16.9566	19.1976	0.000816605	0.00114475	0.00155524	21.92	23.7566	25.9976	0.00118386	0.00160382	0.00210613
RGU295376N0928531E	RGS295376N0928531E	Active	Central	0.205956	17.8757	19.6484	21.8115	0.00132538	0.00182102	0.00242578	14.4757	16.2484	18.4115	0.00107329	0.00150591	0.00204765	21.2757	23.0484	25.2115	0.00157747	0.00213613	0.00280392
RGU295393N0928464E	RGS295393N0928464E	Active	Central	0.16606	16.3586	17.9808	19.9603	0.000977942	0.00134365	0.00178989	12.9586	14.5808	16.5603	0.000774684	0.00108958	0.001485	19.7586	21.3808	23.3603	0.0011812	0.00159773	0.00209477
RGU295511N0928523E	RGS295511N0928523E	Active	Central	0.0829235	14.9891	16.4755	18.2893	0.000447461	0.000614794	0.000818969	11.5891	13.0755	14.8893	0.000345963	0.000487921	0.000666722	18.3891	19.8755	21.6893	0.000548959	0.000741667	0.000971217
RGU295507N0928393E	RGS295507N0928393E	Active	Central	0.0736534	14.858	16.3315	18.1294	0.000393964	0.000541292	0.000721056	11.458	12.9315	14.7294	0.000303812	0.000428602	0.000585829	18.258	19.7315	21.5294	0.000484116	0.000653981	0.000856284
RGU295673N0928468E	RGS295673N0928468E	Transitional	Central	0.040435	14.7516	16.2145	17.9995	0.000214733	0.000295035	0.000393017	11.3516	12.8145	14.5995	0.000165241	0.000233169	0.000318778	18.1516	19.6145	21.3995	0.000264225	0.0003569	0.000467256
RGU295715N0928378E	RGS295715N0928378E	Active	Central	0.123936	16.8495	18.5204	20.5593	0.000751774	0.00103291	0.00137594	13.4495	15.1204	17.1593	0.000600076	0.000843285	0.00114839	20.2495	21.9204	23.9593	0.000903471	0.00122253	0.00160349
RGU295797N0928411E	RGS295797N0928411E	Active	Central	0.108576	18.1756	19.978	22.1773	0.000710435	0.000976111	0.00130028	14.7756	16.578	18.7773	0.000577538	0.000809989	0.00110093	21.5756	23.378	25.5773	0.000843333	0.00114223	0.00149963
RGU295577N0928561E	RGS295577N0928561E	Active	Central	0.0581279	16.2303	17.8399	19.8038	0.000339637	0.000466648	0.000621623	12.8303	14.4399	16.4038	0.000268488	0.000377712	0.0005149	19.6303	21.2399	23.2038	0.000410785	0.000555584	0.000728346
RGU295418N0928673E	RGS295418N0928673E	Transitional	Central	0.179508	16.3167	17.9349	19.9092	0.00105444	0.00144876	0.00192989	12.9167	14.5349	16.5092	0.000834719	0.00117411	0.00160031	19.7167	21.3349	23.3092	0.00127416	0.0017234	0.00225947
RGU295406N0928608E	RGS295406N0928608E	Active	Central	0.0761496	13.6351	14.9873	16.6372	0.000373791	0.000513574	0.000684134	10.2351	11.5873	13.2372	0.000280584	0.000397065	0.000544323	17.0351	18.3873	20.0372	0.000466998	0.000630083	0.000823944
RGU295495N0928769E	RGS295234N0928651E	Active	Central	0.297072	16.2183	17.8266	19.7891	0.00173448	0.0023831	0.00317454	12.8183	14.4266	16.3891	0.00137086	0.00192858	0.00262912	19.6183	21.2266	23.1891	0.00209809	0.00283762	0.00371996
RGU295354N0928747E	RGS295234N0928651E	Active	Central	0.130667	13.3032	14.6225	16.2322	0.000625785	0.000859804	0.00114535	9.90321	11.2225	12.8322	0.000465848	0.000659884	0.000905443	16.7032	18.0225	19.6322	0.000785721	0.00105972	0.00138525
RGU295201N0928689E	RGS295201N0928689E	Active	Central	0.210002	14.9488	16.4313	18.2401	0.00113014	0.00155277	0.00206845	11.5488	13.0313	14.8401	0.0008731	0.00123147	0.00168289	18.3488	19.8313	21.6401	0.00138719	0.00187408	0.00245402
RGU295249N0928680E	RGS295249N0928680E	Active	Central	0.0702189	17.4922	19.2269	21.3435	0.000442182	0.00060754	0.000809307	14.0922	15.8269	17.9435	0.000356234	0.000500105	0.000680385	20.8922	22.6269	24.7435	0.00052813	0.000714975	0.000938228
RGU295237N0928616E	RGS295237N0928616E	Active	Central	0.0271422	22.2959	24.507	27.2049	0.000217858	0.000299328	0.000398736	18.8959	21.107	23.8049	0.000184636	0.000257801	0.000348903	25.6959	27.907	30.6049	0.00025108	0.000340856	0.000448569
RGU294983N0928494E	RGS294983N0928494E	Active	Central	0.0292973	9.25372	10.1714	11.2911	9.75991e-05	0.000134097	0.000178632	5.85372	6.7714	7.89113	6.17393e-05	8.92726e-05	0.000124842	12.6537	13.5714	14.6911	0.000133459	0.000178922	0.000232421
RGU294942N0928547E	RGS294942N0928547E	Active	Central	0.0301587	11.8612	13.0374	14.4727	0.000128778	0.000176936	0.000235697	8.46117	9.63743	11.0727	9.1864e-05	0.000130793	0.000180326	15.2612	16.4374	17.8727	0.000165692	0.000223079	0.000291069
RGU294963N0928625E	RGS294963N0928625E	Active	Central	0.137234	12.738	14.0013	15.5426	0.000629312	0.00086465	0.0011518	9.33804	10.6013	12.1426	0.000461338	0.000654682	0.000899842	16.138	17.4013	18.9426	0.000797286	0.00107462	0.00140376
RGU294767N0928548E	RGS294767N0928548E	Active	Central	0.0325451	15.4132	16.9417	18.8068	0.000180585	0.000248116	0.000330517	12.0132	13.5417	15.4068	0.000140749	0.000198322	0.000270764	18.8132	20.3417	22.2068	0.00022042	0.00029791	0.000390269
RGU294796N0928529E	RGS294796N0928529E	Active	Central	0.0262412	14.8335	16.3045	18.0994	0.000140129	0.000192532	0.000256473	11.4335	12.9045	14.6994	0.00010801	0.000152383	0.000208294	18.2335	19.7045	21.4994	0.000172249	0.000232681	0.000304652
RGU294851N0928502E	RGS294851N0928502E	Active	Central	0.0748874	14.4301	15.8611	17.6072	0.000389028	0.00053451	0.000712022	11.0301	12.4611	14.2072	0.000297366	0.000419932	0.000574529	17.8301	19.2611	21.0072	0.00048069	0.000649087	0.000849515
RGU294805N0928777E	RGS294805N0928777E	Active	Central	0.0917958	13.3688	14.6945	16.3122	0.000441791	0.000607004	0.000808592	9.96877	11.2945	12.9122	0.000329433	0.000466556	0.000640054	16.7688	18.0945	19.7122	0.000554149	0.000747451	0.000977129
RGU294792N0928742E	RGS294792N0928742E	Active	Central	0.0917999	14.2575	15.6714	17.3966	0.000471181	0.000647384	0.000862383	10.8575	12.2714	13.9966	0.000358818	0.000506931	0.000693838	17.6575	19.0714	20.7966	0.000583544	0.000787838	0.00103093
RGU294771N0928853E	RGS294771N0928853E	Active	Central	0.138968	17.9602	19.7413	21.9146	0.000898524	0.00123454	0.00164453	14.5602	16.3413	18.5146	0.000728427	0.00102192	0.00138939	21.3602	23.1413	25.3146	0.00106862	0.00144716	0.00189968
RGU294772N0928952E	RGS294772N0928952E	Active	Central	0.0906294	19.015	20.9006	23.2015	0.000620393	0.000852396	0.00113548	15.615	17.5006	19.8015	0.000509463	0.000713733	0.000969084	22.415	24.3006	26.6015	0.000731324	0.000991059	0.00130188
RGU295337N0928862E	RGS295337N0928862E	Active	Central	0.0546933	21.7329	23.8881	26.5178	0.000427911	0.000587933	0.000783188	18.3329	20.4881	23.1178	0.000360966	0.000504252	0.000682771	25.1329	27.2881	29.9178	0.000494856	0.000671614	0.000883605
RGU295215N0928865E	RGS295215N0928865E	Active	Central	0.0159862	15.5758	17.1204	19.0051	8.96394e-05	0.000123161	0.000164063	12.1758	13.7204	15.6051	7.00722e-05	9.87021e-05	0.000134713	18.9758	20.5204	22.4051	0.000109207	0.00014762	0.000193414
RGU295145N0928819E	RGS295145N0928819E	Active	Central	0.11783	16.1088	17.7063	19.6555	0.000683317	0.000938851	0.00125065	12.7088	14.3063	16.2555	0.000539093	0.000758571	0.00103431	19.5088	21.1063	23.0555	0.000827542	0.00111913	0.00146698
RGU295080N0928911E	RGS295080N0928911E	Active	Central	0.0561466	15.2517	16.7642	18.6097	0.000308279	0.000423564	0.000564231	11.8517	13.3642	15.2097	0.000239556	0.00033766	0.000461146	18.6517	20.1642	22.0097	0.000377003	0.000509468	0.000667316
RGU295039N0928886E	RGS295039N0928886E	Active	Central	0.0527079	15.0091	16.4975	18.3137	0.000284795	0.000391297	0.000521248	11.6091	13.0975	14.9137	0.00022028	0.000310654	0.000424477	18.4091	19.8975	21.7137	0.000349309	0.00047194	0.00061802
RGU295117N0928770E	RGS295117N0928770E	Active	Central	0.0208929	16.493	18.1286	20.1243	0.000124051	0.000170442	0.000227046	13.093	14.7286	16.7243	9.84785e-05	0.000138476	0.000188687	19.893	21.5286	23.5243	0.000149624	0.000202408	0.000265405
RGU295152N0928717E	RGS295152N0928717E	Active	Central	0.0201086	18.2363	20.0448	22.2515	0.000132015	0.000181383	0.000241621	14.8363	16.6448	18.8515	0.000107402	0.000150617	0.000204701	21.6363	23.4448	25.6515	0.000156627	0.000212149	0.00027854
RGU295807N0928939E	RGS295807N0928939E	Active	Central	0.0158072	12.8515	14.1259	15.681	7.31327e-05	0.000100481	0.000133852	9.45147	10.7259	12.281	5.37846e-05	7.62964e-05	0.00010483	16.2515	17.5259	19.081	9.24807e-05	0.000124667	0.000162874
RGU294824N0928956E	RGS294824N0928956E	Active	Central	0.0218669	8.60891	9.46264	10.5043	6.77701e-05	9.31135e-05	0.000124037	5.20891	6.06264	7.10435	4.1005e-05	5.96571e-05	8.38891e-05	12.0089	12.8626	13.9043	9.45352e-05	0.00012657	0.000164184
RGU294787N0929035E	RGS294787N0929035E	Active	Central	0.0518213	18.45	20.2797	22.5122	0.000344198	0.000472914	0.00062997	15.05	16.8797	19.1122	0.000280768	0.000393628	0.000534827	21.85	23.6797	25.9122	0.000407627	0.000552201	0.000725114
RGU294774N0929071E	RGS294774N0929071E	Active	Central	0.0115278	11.9139	13.0954	14.537	4.94429e-05	6.79326e-05	9.04932e-05	8.51389	9.69538	11.137	3.53328e-05	5.0295e-05	6.93281e-05	15.3139	16.4954	17.937	6.3553e-05	8.55702e-05	0.000111658
RGU294851N0928981E	RGS294851N0928981E	Active	Central	0.0842484	12.0797	13.2776	14.7393	0.000366369	0.000503377	0.000670551	8.67967	9.87759	11.3393	0.000263249	0.000374477	0.000515871	15.4797	16.6776	18.1393	0.000469489	0.000632277	0.000825231
RGU296065N0929076E	RGS296065N0929076E	Active	Central	0.0447132	12.2977	13.5173	15.0054	0.000197954	0.000271981	0.000362307	8.89774	10.1173	11.6054	0.000143225	0.00020357	0.000280213	15.6977	16.9173	18.4054	0.000252683	0.000340392	0.0004444
RGU295994N0929136E	RGS295994N0929136E	Active	Central	0.0222216	19.4592	21.389	23.7436	0.000155669	0.000213884	0.000284915	16.0592	17.989	20.3436	0.00012847	0.000179885	0.000244116	22.8592	24.789	27.1436	0.000182869	0.000247883	0.000325714
RGU295982N0929137E	RGS295982N0929137E	Active	Central	0.0114217	10.9625	12.0497	13.3762	4.5076e-05	6.19327e-05	8.25007e-05	7.56252	8.64966	9.97616	3.10958e-05	4.44574e-05	6.15304e-05	14.3625	15.4497	16.7762	5.90562e-05	7.94079e-05	0.000103471
RGU295810N0929005E	RGS295810N0929005E	Active	Central	0.0183011	10.1592	11.1666	12.3959	6.69325e-05	9.19627e-05	0.000122504	6.75916	7.76663	8.99592	4.4532e-05	6.3962e-05	8.8903e-05	13.5592	14.5666	15.7959	8.93331e-05	0.000119963	0.000156105
RGU295711N0929012E	RGS295711N0929012E	Active	Central	0.0104674	14.3837	15.8102	17.5506	5.42019e-05	7.44713e-05	9.92034e-05	10.9837	12.4102	14.1506	4.13897e-05	5.84561e-05	7.99852e-05	17.7837	19.2102	20.9506	6.7014e-05	9.04864e-05	0.000118422
RGU295712N0929074E	RGS295712N0929074E	Active	Central	0.0604771	12.7396	14.003	15.5446	0.000277364	0.000381088	0.000507648	9.33964	10.603	12.1446	0.00020334	0.000288558	0.000396612	16.1396	17.403	18.9446	0.000351388	0.000473618	0.000618684
RGU295740N0929124E	RGS295740N0929124E	Active	Central	0.324388	21.3076	23.4206	25.9989	0.00248829	0.00341881	0.00455421	17.9076	20.0206	22.5989	0.00209124	0.0029225	0.00395864	24.7076	26.8206	29.3989	0.00288534	0.00391513	0.00514979
RGU295807N0929088E	RGS295807N0929088E	Transitional	Central	0.178309	16.4194	18.0477	20.0344	0.00105398	0.00144813	0.00192905	13.0194	14.6477	16.6344	0.000835729	0.00117531	0.00160168	19.8194	21.4477	23.4344	0.00127223	0.00172094	0.00225643
RGU295780N0929030E	RGS295780N0929030E	Active	Central	0.0838202	16.4374	18.0675	20.0565	0.000496004	0.00068149	0.000907815	13.0374	14.6675	16.6565	0.000393408	0.000553245	0.000753921	19.8374	21.4675	23.4565	0.0005986	0.000809735	0.00106171
RGU295758N0929271E	RGS295758N0929271E	Transitional	Central	0.0954206	14.6031	16.0513	17.8183	0.000501638	0.000689231	0.000918127	11.2031	12.6513	14.4183	0.000384843	0.000543238	0.000742935	18.0031	19.4513	21.2183	0.000618433	0.000835225	0.00109332
RGU295842N0929336E	RGS295842N0929336E	Active	Central	0.200695	12.8435	14.1172	15.6713	0.000927944	0.00127496	0.00169838	9.44349	10.7172	12.2713	0.000682294	0.000967896	0.0013299	16.2435	17.5172	19.0713	0.00117359	0.00158202	0.00206685
RGU295920N0929332E	RGS295920N0929332E	Transitional	Central	0.0187677	18.4354	20.2636	22.4943	0.000124556	0.000171136	0.000227971	15.0354	16.8636	19.0943	0.000101585	0.000142421	0.000193513	21.8354	23.6636	25.8943	0.000147528	0.00019985	0.000262428
RGU295540N0929267E	RGS295219N0928995E	Active	Central	0.109739	16.7635	18.4259	20.4543	0.000662261	0.000909921	0.00121211	13.3635	15.0259	17.0543	0.00052794	0.000742019	0.00101063	20.1635	21.8259	23.8543	0.000796582	0.00107782	0.00141359
RGU295472N0929267E	RGS295219N0928995E	Active	Central	0.156457	14.771	16.2358	18.0232	0.000831969	0.00114309	0.00152272	11.371	12.8358	14.6232	0.000640466	0.000903715	0.00123546	18.171	19.6358	21.4232	0.00102347	0.00138247	0.00180997
RGU295258N0929023E	RGS295219N0928995E	Active	Central	0.1354	19.4561	21.3855	23.7398	0.000948371	0.00130302	0.00173576	16.0561	17.9855	20.3398	0.000782641	0.00109586	0.00148717	22.8561	24.7855	27.1398	0.0011141	0.00151019	0.00198436
RGU295216N0928990E	RGS295216N0928990E	Active	Central	0.125558	16.0798	17.6744	19.6201	0.000726817	0.000998619	0.00133026	12.6798	14.2744	16.2201	0.000573135	0.000806516	0.00109974	19.4798	21.0744	23.0201	0.0008805	0.00119072	0.00156079
RGU295162N0928974E	RGS295162N0928974E	Active	Central	0.0143711	15.0692	16.5636	18.387	7.79616e-05	0.000107116	0.00014269	11.6692	13.1636	14.987	6.03714e-05	8.51285e-05	0.000116305	18.4692	19.9636	21.787	9.55518e-05	0.000129104	0.000169075
RGU295136N0928948E	RGS295136N0928948E	Active	Central	0.056333	11.6283	12.7815	14.1886	0.000235821	0.000324009	0.000431614	8.22834	9.38151	10.7886	0.00016687	0.00023782	0.000328186	15.0283	16.1815	17.5886	0.000304773	0.000410199	0.000535041
RGU295081N0928953E	RGS295081N0928953E	Transitional	Central	0.0977671	14.1123	15.5118	17.2195	0.0004967	0.000682446	0.000909089	10.7123	12.1118	13.8195	0.000377033	0.000532863	0.000729589	17.5123	18.9118	20.6195	0.000616367	0.00083203	0.00108859
RGU294998N0928976E	RGS294998N0928976E	Active	Central	0.013633	24.6425	27.0863	30.0681	0.000120942	0.00016617	0.000221355	21.2425	23.6863	26.6681	0.000104255	0.000145311	0.000196325	28.0425	30.4863	33.4681	0.000137629	0.000187028	0.000246385
RGU294992N0928999E	RGS294992N0928999E	Transitional	Central	0.0932743	13.5816	14.9285	16.5719	0.000456054	0.000626601	0.000834697	10.1816	11.5285	13.1719	0.000341886	0.000483891	0.000663445	16.9816	18.3285	19.9719	0.000570222	0.00076931	0.00100595
RGU295004N0929051E	RGS295004N0929051E	Transitional	Central	0.114644	18.4854	20.3186	22.5554	0.000762927	0.00104823	0.00139635	15.0854	16.9186	19.1554	0.000622603	0.000872827	0.00118587	21.8854	23.7186	25.9554	0.000903251	0.00122364	0.00160684
RGU294923N0929122E	RGS294923N0929122E	Transitional	Central	0.224112	18.2893	20.103	22.316	0.00147558	0.00202739	0.0027007	14.8893	16.703	18.916	0.00120127	0.0016845	0.00228923	21.6893	23.503	25.716	0.0017499	0.00237029	0.00311217
RGU295085N0929289E	RGS295085N0929289E	Active	Central	0.0116043	10.1645	11.1725	12.4024	4.24626e-05	5.8342e-05	7.77175e-05	6.76449	7.77249	9.00243	2.82589e-05	4.05874e-05	5.6412e-05	13.5645	14.5725	15.8024	5.66662e-05	7.60965e-05	9.9023e-05
RGU295082N0929214E	RGS295082N0929214E	Transitional	Central	0.01882	10.8569	11.9336	13.2473	7.35582e-05	0.000101066	0.00013463	7.45695	8.53362	9.84735	5.05224e-05	7.22714e-05	0.000100077	14.2569	15.3336	16.6473	9.65939e-05	0.000129861	0.000169184
RGU295111N0929135E	RGS295545N0929368E	Transitional	Central	0.0774291	12.6496	13.9041	15.4347	0.000352602	0.000484462	0.000645353	9.24964	10.5041	12.0347	0.000257829	0.000365995	0.000503193	16.0496	17.3041	18.8347	0.000447376	0.000602928	0.000787513
RGU295192N0929107E	RGS295545N0929368E	Transitional	Central	0.0269725	10.7182	11.7811	13.078	0.000104075	0.000142995	0.000190484	7.3182	8.38111	9.67804	7.10604e-05	0.000101727	0.000140962	14.1182	15.1811	16.478	0.000137089	0.000184263	0.000240005
RGU295402N0929340E	RGS295402N0929340E	Active	Central	0.0251182	22.614	24.8566	27.593	0.000204488	0.000280959	0.000374266	19.214	21.4566	24.193	0.000173744	0.000242528	0.000328149	26.014	28.2566	30.993	0.000235233	0.00031939	0.000420383
RGU295542N0929367E	RGS295542N0929367E	Active	Central	0.0383148	11.9507	13.1358	14.5819	0.000164839	0.000226483	0.000301698	8.55066	9.7358	11.1819	0.000117942	0.000167861	0.000231353	15.3507	16.5358	17.9819	0.000211737	0.000285104	0.000372044
RGU295563N0929379E	RGS295563N0929379E	Active	Central	0.0707273	16.4072	18.0343	20.0197	0.000417758	0.000573984	0.000764606	13.0072	14.6343	16.6197	0.000331188	0.000465771	0.00063475	19.8072	21.4343	23.4197	0.000504329	0.000682196	0.000894461
RGU295664N0929125E	RGS295664N0929125E	Transitional	Central	0.0698016	11.3901	12.5197	13.8979	0.000286217	0.000393251	0.000523851	7.99011	9.11965	10.4979	0.00020078	0.000286455	0.000395696	14.7901	15.9197	17.2979	0.000371654	0.000500048	0.000652007
RGU295590N0929104E	RGS295590N0929104E	Active	Central	0.0171127	21.3759	23.4957	26.0822	0.000131687	0.000180933	0.000241022	17.9759	20.0957	22.6822	0.000110741	0.000154751	0.000209603	24.7759	26.8957	29.4822	0.000152633	0.000207116	0.000272441
RGU295606N0929018E	RGS295606N0929018E	Transitional	Central	0.0425548	10.837	11.9117	13.223	0.00016602	0.000228105	0.000303859	7.43701	8.5117	9.82301	0.000113933	0.000162996	0.000225729	14.237	15.3117	16.623	0.000218107	0.000293214	0.00038199
RGU296211N0929447E	RGS295139N0929486E	Transitional	Central	0.151238	15.2786	16.7937	18.6425	0.000831855	0.00114294	0.00152251	11.8786	13.3937	15.2425	0.000646739	0.000911541	0.00124483	18.6786	20.1937	22.0425	0.00101697	0.00137433	0.00180018
RGU295160N0929510E	RGS295160N0929510E	Transitional	Central	0.143044	17.8944	19.669	21.8343	0.000921489	0.00126609	0.00168656	14.4944	16.269	18.4343	0.000746403	0.00104723	0.00142393	21.2944	23.069	25.2343	0.00109657	0.00148495	0.00194919
RGU295149N0929526E	RGS295149N0929526E	Active	Central	0.23155	14.8049	16.2731	18.0646	0.00123411	0.00169562	0.00225874	11.4049	12.8731	14.6646	0.000950695	0.00134135	0.00183362	18.2049	19.6731	21.4646	0.00151753	0.00204989	0.00268387
RGU295211N0929471E	RGS295211N0929471E	Transitional	Central	0.0324916	13.456	14.7904	16.4186	0.000157394	0.000216254	0.000288072	10.056	11.3904	13.0186	0.000117625	0.000166542	0.000228418	16.856	18.1904	19.8186	0.000197164	0.000265966	0.000347727
RGU295406N0929424E	RGS295406N0929424E	Transitional	Central	0.189326	12.9747	14.2614	15.8313	0.000884318	0.00121502	0.00161853	9.57467	10.8614	12.4313	0.000652583	0.00092535	0.00127093	16.3747	17.6614	19.2313	0.00111605	0.00150469	0.00196613
RGU295503N0929396E	RGS295503N0929396E	Active	Central	0.196931	13.5031	14.8422	16.4761	0.000957304	0.0013153	0.00175211	10.1031	11.4422	13.0761	0.000716261	0.00101399	0.00139055	16.9031	18.2422	19.8761	0.00119835	0.0016166	0.00211368
RGU295583N0929385E	RGS295583N0929385E	Transitional	Central	0.22639	14.9551	16.4382	18.2478	0.00121885	0.00167465	0.00223081	11.5551	13.0382	14.8478	0.000941747	0.00132827	0.00181516	18.3551	19.8382	21.6478	0.00149595	0.00202103	0.00264646
RGU296018N0929483E	RGS296018N0929483E	Active	Central	0.0137263	13.3647	14.69	16.3072	6.60412e-05	9.07381e-05	0.000120873	9.96469	11.29	12.9072	4.92402e-05	6.97368e-05	9.5671e-05	16.7647	18.09	19.7072	8.28422e-05	0.000111739	0.000146074
RGU294628N0926165E	RGS294628N0926165E	Transitional	Central	0.122583	13.5053	14.8446	16.4788	0.000595986	0.000818861	0.00109081	10.1053	11.4446	13.0788	0.000445944	0.000631309	0.000865746	16.9053	18.2446	19.8788	0.000746027	0.00100641	0.00131587
RGU294538N0925964E	RGS294538N0925964E	Active	Central	0.0195685	13.7088	15.0683	16.7271	9.65739e-05	0.000132689	0.000176755	10.3088	11.6683	13.3271	7.2622e-05	0.000102749	0.000140827	17.1088	18.4683	20.1271	0.000120526	0.000162629	0.000212683
RGU294615N0925891E	RGS294615N0925891E	Active	Central	0.0452462	14.5963	16.0438	17.81	0.000237754	0.000326664	0.000435151	11.1963	12.6438	14.41	0.000182372	0.000257438	0.000352079	17.9963	19.4438	21.21	0.000293135	0.000395891	0.000518223
RGU294480N0925886E	RGS294480N0925886E	Active	Central	0.0320509	13.2724	14.5886	16.1946	0.000153141	0.00021041	0.000280288	9.87239	11.1886	12.7946	0.000113911	0.000161372	0.000221442	16.6724	17.9886	19.5946	0.000192371	0.000259448	0.000339133
RGU294227N0925953E	RGS294227N0925953E	Active	Central	0.0290882	13.2571	14.5718	16.1759	0.000138825	0.00019074	0.000254086	9.85708	11.1718	12.7759	0.000103221	0.000146235	0.00020068	16.6571	17.9718	19.5759	0.000174429	0.000235245	0.000307491
RGU294207N0925993E	RGS294207N0925993E	Active	Central	0.0143679	12.731	13.9935	15.534	6.58505e-05	9.04761e-05	0.000120523	9.33103	10.5935	12.134	4.82642e-05	6.84932e-05	9.4144e-05	16.131	17.3935	18.934	8.34368e-05	0.000112459	0.000146903
RGU294183N0926003E	RGS294183N0926003E	Active	Central	0.0120542	12.7616	14.0271	15.5713	5.53793e-05	7.6089e-05	0.000101358	9.36158	10.6271	12.1713	4.06249e-05	5.7646e-05	7.92267e-05	16.1616	17.4271	18.9713	7.01337e-05	9.45319e-05	0.00012349
RGU294150N0926008E	RGS294150N0926008E	Active	Central	0.0245586	13.1032	14.4027	15.9882	0.000115847	0.000159169	0.00021203	9.70322	11.0027	12.5882	8.57872e-05	0.000121595	0.00016694	16.5032	17.8027	19.3882	0.000145907	0.000196744	0.00025712
RGU294111N0925969E	RGS294111N0925969E	Active	Central	0.0217152	25.6535	28.1975	31.3017	0.000200545	0.000275542	0.00036705	22.2535	24.7975	27.9017	0.000173966	0.000242317	0.000327181	29.0535	31.5975	34.7017	0.000227125	0.000308766	0.000406919
RGU294146N0925919E	RGS294146N0925919E	Active	Central	0.0210028	12.7264	13.9884	15.5284	9.62242e-05	0.000132208	0.000176115	9.32637	10.5884	12.1284	7.05167e-05	0.000100074	0.000137554	16.1264	17.3884	18.9284	0.000121932	0.000164343	0.000214676
RGU294136N0925859E	RGS294136N0925859E	Active	Central	0.146202	16.9945	18.6798	20.7362	0.000894464	0.00122896	0.0016371	13.5945	15.2798	17.3362	0.000715513	0.00100527	0.00136867	20.3945	22.0798	24.1362	0.00107341	0.00145265	0.00190553
RGU294183N0926150E	RGS294183N0926150E	Active	Central	0.044014	16.9108	18.5879	20.6341	0.000267953	0.000368157	0.000490424	13.5108	15.1879	17.2341	0.00021408	0.000300816	0.000409614	20.3108	21.9879	24.0341	0.000321826	0.000435499	0.000571233
RGU294096N0926128E	RGS294096N0926128E	Active	Central	0.0646368	12.9038	14.1835	15.7449	0.000300262	0.000412548	0.000549557	9.50381	10.7835	12.3449	0.000221147	0.000313654	0.000430884	16.3038	17.5835	19.1449	0.000379377	0.000511443	0.00066823
RGU294091N0926266E	RGS294091N0926266E	Active	Central	0.0980839	14.9021	16.38	18.1832	0.000526197	0.000722975	0.000963077	11.5021	12.98	14.7832	0.000406143	0.000572906	0.000782995	18.3021	19.78	21.5832	0.000646252	0.000873043	0.00114316
RGU294052N0926147E	RGS294052N0926147E	Active	Central	0.0673304	24.4658	26.8921	29.8525	0.000593026	0.000814794	0.00108539	21.0658	23.4921	26.4525	0.000510613	0.000711779	0.000961772	27.8658	30.2921	33.2525	0.000675438	0.00091781	0.00120901
RGU294012N0926069E	RGS294012N0926069E	Active	Central	0.0372696	15.2704	16.7848	18.6326	0.000204885	0.000281503	0.000374992	11.8704	13.3848	15.2326	0.000159266	0.000224481	0.000306565	18.6704	20.1848	22.0326	0.000250503	0.000338526	0.000443419
RGU293970N0926089E	RGS293970N0926089E	Active	Central	0.0512523	14.2516	15.6649	17.3894	0.000262953	0.000361288	0.000481273	10.8516	12.2649	13.9894	0.000200221	0.000282872	0.000387173	17.6516	19.0649	20.7894	0.000325686	0.000439704	0.000575372
RGU293952N0926170E	RGS293952N0926170E	Active	Central	0.0829737	10.8866	11.9662	13.2835	0.000325188	0.000446796	0.000595178	7.48658	8.56619	9.8835	0.000223628	0.000319846	0.000442838	14.2866	15.3662	16.6835	0.000426748	0.000573745	0.000747518
RGU293911N0926111E	RGS293911N0926111E	Active	Central	0.0378674	10.3544	11.3813	12.6342	0.000141154	0.00019394	0.000258349	6.95442	7.98126	9.23418	9.48045e-05	0.000136003	0.000188824	13.7544	14.7813	16.0342	0.000187504	0.000251878	0.000327873
RGU293795N0926208E	RGS293795N0926208E	Active	Central	0.058048	13.5906	14.9383	16.5828	0.000284006	0.000390214	0.000519805	10.1906	11.5383	13.1828	0.000212955	0.0003014	0.000413229	16.9906	18.3383	19.9828	0.000355057	0.000479027	0.000626381
RGU293769N0925864E	RGS293769N0925864E	Active	Central	0.0267926	13.7397	15.1023	16.7648	0.000132524	0.000182083	0.000242554	10.3397	11.7023	13.3648	9.97302e-05	0.000141091	0.000193363	17.1397	18.5023	20.1648	0.000165318	0.000223076	0.000291745
RGU293835N0925938E	RGS293835N0925938E	Transitional	Central	0.0430843	10.8296	11.9036	13.214	0.000167971	0.000230786	0.000307431	7.42964	8.50361	9.81403	0.000115236	0.000164867	0.000228328	14.2296	15.3036	16.614	0.000220707	0.000296705	0.000386534
RGU293820N0926070E	RGS293820N0926070E	Active	Central	0.0143535	12.1542	13.3596	14.8303	6.28042e-05	8.62906e-05	0.000114948	8.75423	9.95955	11.4303	4.52355e-05	6.43297e-05	8.85949e-05	15.5542	16.7596	18.2303	8.0373e-05	0.000108252	0.000141301
RGU293696N0926087E	RGS293696N0926087E	Active	Central	0.0430772	13.8306	15.2021	16.8757	0.000214481	0.000294689	0.000392556	10.4306	11.8021	13.4757	0.000161755	0.000228781	0.000313466	17.2306	18.6021	20.2757	0.000267208	0.000360597	0.000471646
RGU293544N0926194E	RGS293544N0926194E	Active	Central	0.162996	11.8918	13.0711	14.5101	0.000697797	0.000958746	0.00127715	8.49183	9.67113	11.1101	0.000498289	0.000709362	0.000977887	15.2918	16.4711	17.9101	0.000897304	0.00120813	0.00157641
RGU293526N0926177E	RGS293526N0926177E	Active	Central	0.0224546	18.5402	20.3788	22.6222	0.000149872	0.000205919	0.000274305	15.1402	16.9788	19.2222	0.000122388	0.000171563	0.000233078	21.9402	23.7788	26.0222	0.000177357	0.000240274	0.000315532
RGU293507N0926153E	RGS293507N0926153E	Active	Central	0.0259624	16.4532	18.0848	20.0757	0.000153779	0.000211287	0.000281456	13.0532	14.6848	16.6757	0.000122001	0.000171564	0.000233789	19.8532	21.4848	23.4757	0.000185557	0.000251009	0.000329123
RGU293295N0926143E	RGS293295N0926143E	Active	Central	0.116009	21.8521	24.0192	26.6634	0.000912617	0.0012539	0.00167033	18.4521	20.6192	23.2634	0.000770622	0.00107641	0.00145733	25.2521	27.4192	30.0634	0.00105461	0.00143139	0.00188332
RGU294556N0926228E	RGS294556N0926228E	Active	Central	0.142108	11.9735	13.1609	14.6098	0.000612554	0.000841625	0.00112113	8.57352	9.76092	11.2098	0.000438613	0.000624199	0.000860221	15.3735	16.5609	18.0098	0.000786494	0.00105905	0.00138204
RGU293809N0926250E	RGS293809N0926250E	Active	Central	0.023817	11.2857	12.4049	13.7705	9.6765e-05	0.000132951	0.000177105	7.88571	9.0049	10.3705	6.7613e-05	9.65114e-05	0.000133377	14.6857	15.8049	17.1705	0.000125917	0.000169391	0.000220833
RGU293853N0926420E	RGS293853N0926420E	Active	Central	0.0238794	17.5621	19.3037	21.4288	0.000150974	0.000207433	0.000276322	14.1621	15.9037	18.0288	0.000121746	0.000170897	0.000232479	20.9621	22.7037	24.8288	0.000180203	0.000243968	0.000320164
RGU293879N0926434E	RGS293879N0926434E	Active	Central	0.0498937	17.7371	19.496	21.6423	0.000318588	0.000437728	0.000583099	14.3371	16.096	18.2423	0.000257518	0.000361391	0.000491494	21.1371	22.896	25.0423	0.000379658	0.000514065	0.000674704
RGU293976N0926528E	RGS293976N0926528E	Active	Central	0.151336	20.4412	22.4683	24.9418	0.00111365	0.00153012	0.00203828	17.0412	19.0683	21.5418	0.00092842	0.00129857	0.00176042	23.8412	25.8683	28.3418	0.00129889	0.00176166	0.00231613
RGU294019N0926453E	RGS294019N0926453E	Active	Central	0.0340147	16.3905	18.0159	19.9993	0.000200707	0.000275763	0.000367345	12.9905	14.6159	16.5993	0.000159073	0.000223721	0.000304894	19.7905	21.4159	23.3993	0.00024234	0.000327805	0.000429796
RGU293998N0926401E	RGS293998N0926401E	Transitional	Central	0.019983	17.9077	19.6836	21.8505	0.000128826	0.000177002	0.000235785	14.5077	16.2836	18.4505	0.000104367	0.000146428	0.000199096	21.3077	23.0836	25.2505	0.000153286	0.000207576	0.000272474
RGU294047N0926379E	RGS294047N0926379E	Active	Central	0.126859	17.0783	18.772	20.8385	0.000779952	0.00107162	0.00142751	13.6783	15.372	17.4385	0.000624677	0.00087753	0.0011946	20.4783	22.172	24.2385	0.000935227	0.00126572	0.00166043
RGU294178N0926466E	RGS294178N0926466E	Transitional	Central	0.017854	14.5675	16.0121	17.7748	9.36315e-05	0.000128646	0.00017137	11.1675	12.6121	14.3748	7.17782e-05	0.000101329	0.00013859	17.9675	19.4121	21.1748	0.000115485	0.000155963	0.00020415
RGU294175N0926499E	RGS294175N0926499E	Transitional	Central	0.0190549	11.6466	12.8016	14.2109	7.98932e-05	0.00010977	0.000146225	8.24661	9.40159	10.8109	5.65699e-05	8.06161e-05	0.00011124	15.0466	16.2016	17.6109	0.000103216	0.000138924	0.00018121
RGU294302N0926480E	RGS294302N0926480E	Active	Central	0.134605	18.9851	20.8678	23.165	0.000919977	0.00126401	0.0016838	15.5851	17.4678	19.765	0.00075522	0.00105807	0.00143666	22.3851	24.2678	26.565	0.00108473	0.00146996	0.00193093
RGU294362N0926440E	RGS294362N0926440E	Active	Central	0.0440346	15.2196	16.7289	18.5705	0.000241268	0.000331493	0.000441582	11.8196	13.3289	15.1705	0.000187369	0.00026412	0.000360735	18.6196	20.1289	21.9705	0.000295166	0.000398866	0.00052243
RGU294454N0926444E	RGS294454N0926444E	Active	Central	0.0916003	17.102	18.798	20.8673	0.000563956	0.000774854	0.00103219	13.702	15.398	17.4673	0.000451837	0.000634705	0.000864007	20.502	22.198	24.2673	0.000676075	0.000915002	0.00120036
RGU294530N0926394E	RGS294588N0926596E	Active	Central	0.105608	14.4005	15.8285	17.571	0.000547488	0.000752227	0.00100204	11.0005	12.4285	14.171	0.000418224	0.000590647	0.000808148	17.8005	19.2285	20.971	0.000676752	0.000913807	0.00119594
RGU294526N0926459E	RGS294588N0926596E	Active	Central	0.0815412	14.3256	15.7463	17.4797	0.000420526	0.000577786	0.000769671	10.9256	12.3463	14.0797	0.00032072	0.000453028	0.000619962	17.7256	19.1463	20.8797	0.000520332	0.000702544	0.000919381
RGU294511N0926488E	RGS294588N0926596E	Active	Central	0.0519253	19.756	21.7152	24.1058	0.000369302	0.000507406	0.000675918	16.356	18.3152	20.7058	0.000305745	0.000427961	0.000580583	23.156	25.1152	27.5058	0.000432858	0.000586852	0.000771253
RGU294577N0926531E	RGS294531N0926561E	Active	Central	0.050356	11.9505	13.1356	14.5816	0.00021664	0.000297655	0.000396507	8.55047	9.73558	11.1816	0.000155004	0.00022061	0.000304054	15.3505	16.5356	17.9816	0.000278276	0.0003747	0.000488961
RGU294647N0926531E	RGS294531N0926561E	Active	Central	0.0362504	13.9706	15.3561	17.0466	0.000182319	0.0002505	0.000333691	10.5706	11.9561	13.6466	0.000137949	0.000195036	0.000267135	17.3706	18.7561	20.4466	0.00022669	0.000305963	0.000400247
RGU294626N0926667E	RGS294626N0926667E	Active	Central	0.0465674	13.8606	15.2351	16.9123	0.000232363	0.000319257	0.000425284	10.4606	11.8351	13.5123	0.000175364	0.000248009	0.000339786	17.2606	18.6351	20.3123	0.000289361	0.000390505	0.000510781
RGU294587N0926594E	RGS294587N0926594E	Transitional	Central	0.168011	11.6815	12.8399	14.2534	0.000706543	0.000970762	0.00129316	8.28146	9.4399	10.8534	0.000500897	0.000713705	0.000984687	15.0815	16.2399	17.6534	0.000912189	0.00122782	0.00160162
RGU294601N0926626E	RGS294601N0926626E	Transitional	Central	0.190339	16.3356	17.9555	19.9322	0.00111934	0.00153793	0.00204869	12.9356	14.5555	16.5322	0.000886369	0.00124672	0.00169923	19.7356	21.3555	23.3322	0.00135232	0.00182915	0.00239815
RGU294571N0926583E	RGS294571N0926583E	Transitional	Central	0.0216737	12.6326	13.8854	15.414	9.85665e-05	0.000135427	0.000180402	9.23261	10.4854	12.014	7.20378e-05	0.000102266	0.000140609	16.0326	17.2854	18.814	0.000125095	0.000168587	0.000220195
[truncated: 2,027 more rows]

## Sheet: Brenning, 2005
Primary_ID	Associated	Activity	Region	Area (km3)	thickness(m)	WVEQ-40(km3)	WVEQ-50(km3)	WVEQ-60(km3)
[truncated: 3,674 more rows]

## Sheet: Janke et al., 2015
Primary_ID	Associated	Activity	Region	Area(km2)	H - 45% ice(m)	H - 25% ice(m)	H - 10% ice(m)	WVEQ - 45% ice (km3)	WVEQ - 25% ice (km3)	WVEQ -10% ice (km3)
[truncated: 5,057 more rows]

[truncated: 1 more sheets: Example - Cicoira - 40% ]
