# Supplementary material for: Assessment of rock glaciers, water storage, and permafrost distribution in Guokalariju, Tibetan Plateau
Source: Copernicus journal article supplement (doi:10.5194/tc-2022-178), 2022-10-10
Supplement: Supplementary file 4 [file rg5053.xlsx]

## Sheet: ALL1
LabelID	Dynamic_Type	Derived	Uncertainty	POINT_X	POINT_Y	polyglon_area	polyglon_length	L_Length	W_Length	Geometry_Type	MIN_Altitude	MAX_Altitude	RANGE_Altitude	MEAN_Altitude	MIN_Slope	MAX_Slope	RANGE_Slope	MEAN_Slope	MIN_Aspect	MAX_Aspect	RANGE_Aspect	MEAN_Aspect	Aspect_Class	WVEQ_40(km3)	WVEQ_50(km3)	WVEQ_60(km3)
1	Relict	T	13	91.2421	29.525	23895.5	789.048	95.069	342.947	Lobate-shaped	5159	5212	53	5186.75	8.68913	26.2905	17.6014	17.063	299.291	334.747	35.4555	317.308	NW
2	Relict	T	9	91.2612	29.5184	6915.92	363.004	141.164	52.9414	Tongue-shaped	5299	5382	83	5335.29	23.8392	42.521	18.6818	36.0394	24.3411	66.4768	42.1357	37.3454	NE
3	Relict	T	13	91.2722	29.5246	19777.7	537.979	187.221	133.758	Tongue-shaped	5229	5312	83	5265.12	11.665	45.4059	33.7408	25.1786	0	359.349	359.349	122.412	SE
4	Relict	D	11	91.2759	29.5303	65420.5	1106.23	376.8	169.063	Tongue-shaped	5192	5369	177	5257.51	6.44143	47.1385	40.6971	25.5165	0.374476	359.37	358.996	200.82	S
5	Relict	T	11	91.3223	29.5268	12756.7	527.02	72.8528	221.98	Lobate-shaped	5228	5255	27	5243	5.73719	26.2562	20.519	13.9954	0	353.333	353.333	174.333	S
6	Relict	T	9	91.3379	29.4458	13344.6	447.532	90.5205	173.091	Lobate-shaped	5234	5275	41	5250.12	16.0579	40.5884	24.5305	21.585	0	357.58	357.58	270.72	W
7	Relict	T	9	91.3462	29.463	7668.45	354.086	138.514	63.9927	Tongue-shaped	5242	5312	70	5275.11	13.9743	38.5089	24.5346	31.2105	40.2364	56.6503	16.4139	48.9654	NE
8	Relict	T	14	91.3523	29.5109	14048.3	574.002	211.285	65.9419	Tongue-shaped	5272	5381	109	5320.71	10.7046	43.7766	33.072	32.4991	1.29606	354.007	352.711	89.7833	E
9	Intact	T	11	91.3553	29.5129	8525.49	489.686	54.0034	222.309	Lobate-shaped	5246	5269	23	5256.55	16.77	42.0794	25.3094	28.2291	330.488	350.287	19.7982	338.352	N	5.91746e-05	7.39683e-05	8.8762e-05
10	Relict	D	11	91.37	29.5015	17727.4	580.442	105.87	143.209	Lobate-shaped	5247	5304	57	5267.24	4.56438	35.6261	31.0617	21.3779	281.659	355.972	74.3124	325.514	NW
11	Relict	D	12	91.3719	29.4956	27304	748.992	314.532	89.7986	Tongue-shaped	5261	5411	150	5333.75	11.8208	46.2795	34.4587	26.4003	3.21548	354.746	351.531	113.503	SE
12	Relict	T	13	91.3889	29.4941	12023.4	476.409	74.1208	188.772	Lobate-shaped	5251	5277	26	5267.29	4.51153	39.3501	34.8385	23.0782	285.255	355.135	69.8804	315.122	NW
13	Relict	T	11	91.3894	29.496	13665.8	476.068	87.5232	154.422	Lobate-shaped	5207	5237	30	5217.62	8.35153	29.8744	21.5229	16.9065	277.431	322.125	44.6936	299.416	NW
14	Intact	D	11	91.3994	29.4908	20535.2	554.27	195.595	114.782	Tongue-shaped	5225	5315	90	5264.23	15.1755	42.3031	27.1276	25.2772	0.725224	358.919	358.194	69.6755	E	0.00016993	0.000212413	0.000254895
15	Relict	T	10	91.4051	29.5	18266.1	610.925	108.387	244.842	Lobate-shaped	5140	5204	64	5163.55	10.2295	43.9376	33.7081	29.6887	267.274	333.435	66.1613	303.522	NW
16	Relict	T	10	91.4115	29.5086	12205.6	629.185	68.079	277.047	Lobate-shaped	5199	5256	57	5217.72	16.3493	39.1853	22.836	22.8344	287.987	332.063	44.0755	301.729	NW
17	Relict	T	9	91.4124	29.4713	26452.9	661.312	114.16	256.44	Lobate-shaped	5201	5251	50	5224.17	6.16775	37.9627	31.795	22.954	0.784824	353.157	352.372	72.2476	E
18	Relict	T	9	91.418	29.5135	3860.8	337.08	29.7871	150.691	Lobate-shaped	5356	5364	8	5360.4	11.2448	17.9123	6.66749	14.6761	23.4287	349.287	325.858	276.972	W
19	Relict	T	9	91.4214	29.5133	4459.59	291.113	45.2437	123.72	Lobate-shaped	5303	5316	13	5308.75	17.7158	22.7582	5.04232	20.1724	13.6097	30.6997	17.09	23.4677	NE
20	Relict	T	13	91.4308	29.4645	13671.9	451.374	95.8835	167.684	Lobate-shaped	5208	5241	33	5226.94	7.60572	36.5203	28.9146	18.5803	314.53	358.493	43.9622	334.705	NW
21	Relict	T	10	91.432	29.4663	13991.8	532.337	77.6237	218.257	Lobate-shaped	5199	5226	27	5211.12	13.0786	24.7934	11.7147	19.5229	281.725	324.335	42.6099	301.782	NW
22	Relict	T	15	91.446	29.5624	78223.5	1159.81	219.755	410.088	Lobate-shaped	5144	5296	152	5210.79	9.55412	49.3564	39.8023	31.8305	7.30576	45.4939	38.1882	30.1749	NE
23	Relict	T	12	91.4503	29.5821	6550.25	410.491	42.4277	171.996	Lobate-shaped	5127	5171	44	5146.29	22.8499	38.7523	15.9024	31.3714	302.417	326.634	24.2166	317.075	NW
24	Relict	T	9	91.4513	29.526	2788.69	222.488	80.2178	47.7034	Tongue-shaped	5149	5173	24	5161	11.8208	36.465	24.6442	25.3729	332.691	344.539	11.8479	337.273	NW
25	Relict	T	13	91.4515	29.5835	9722.14	500.583	49.8786	212.255	Lobate-shaped	5107	5125	18	5113.9	8.86934	20.5035	11.6342	13.6149	315	346.43	31.4296	332.173	NW
26	Relict	T	14	91.4522	29.5605	6480.21	311.517	65.5204	118.312	Lobate-shaped	5252	5274	22	5264.12	16.5727	36.3984	19.8257	22.0887	13.0919	56.7683	43.6764	33.46	NE
27	Relict	T	10	91.4539	29.5262	17800.4	621.165	65.8467	261.046	Lobate-shaped	5127	5160	33	5140.05	8.68913	34.9404	26.2512	20.9201	0	359.091	359.091	149.229	SE
28	Relict	T	11	91.4562	29.5248	19665.9	651.197	182.935	118.794	Tongue-shaped	5164	5226	62	5180.87	3.20284	45.2309	42.0281	21.6151	0	358.264	358.264	161.259	S
29	Relict	T	11	91.4603	29.5419	19000.2	525.801	183.291	122.91	Tongue-shaped	5131	5249	118	5188.71	22.2913	37.3778	15.0865	31.8357	0	359.341	359.341	204.629	SW
30	Relict	T	11	91.4617	29.5417	11604.3	419.966	125.784	100.875	Tongue-shaped	5173	5218	45	5186.57	8.96779	35.3017	26.334	21.2139	6.26349	357.93	351.666	86.4752	E
31	Relict	T	9	91.4731	29.5589	25748.7	637.86	133.779	250.946	Lobate-shaped	5241	5296	55	5260.03	8.40763	39.4788	31.0712	22.2064	266.76	344.982	78.2213	318.539	NW
32	Intact	T	7	91.4937	29.5504	26907.7	694.743	120.091	267.472	Lobate-shaped	5190	5259	69	5220.47	9.48065	39.2822	29.8016	28.066	2.76386	69.444	66.6801	33.6343	NE	0.00023503	0.000293788	0.000352546
33	Relict	T	13	91.4957	29.6642	12829.6	528.72	77.4903	221.55	Lobate-shaped	5119	5158	39	5136.27	5.15586	37.307	32.1511	26.5424	325.008	355.539	30.5312	341.729	N
34	Relict	D	12	91.4966	29.6615	15071.6	555.335	91.2724	219.928	Lobate-shaped	5253	5329	76	5294.22	19.4709	41.9935	22.5225	29.963	6.34019	358.919	352.579	303.785	NW
35	Relict	T	13	91.4977	29.642	12698.8	485.895	108.708	176.369	Lobate-shaped	5122	5155	33	5140.13	6.81771	28.0151	21.1974	18.5685	6.54629	359.215	352.669	178.853	S
36	Relict	T	11	91.5057	29.6542	20297.5	549.15	170.44	118.09	Tongue-shaped	5078	5181	103	5122.32	20.3568	46.342	25.9853	30.7307	12.5288	54.4623	41.9335	35.1904	NE
37	Relict	T	10	91.5079	29.6524	6649.27	305.511	73.8419	89.9789	Lobate-shaped	5158	5185	27	5168.38	18.173	32.4623	14.2893	24.1167	276.483	310.795	34.3116	298.654	NW
38	Relict	T	10	91.5175	29.5628	4649.42	289.038	50.2379	120.703	Lobate-shaped	5240	5251	11	5246.33	17.9743	23.9447	5.9705	21.1275	290.624	300.069	9.44504	296.186	NW
39	Intact	T	9	91.551	29.577	30265	850.904	89.794	360.031	Lobate-shaped	5189	5269	80	5217.79	9.0522	50.1672	41.115	29.0118	272.291	332.745	60.454	296.81	NW	0.000270646	0.000338307	0.000405969
40	Intact	D	14	91.556	29.573	14147.2	483.342	144.405	111.043	Tongue-shaped	5272	5327	55	5305.94	15.6137	37.0446	21.4309	23.6858	5.01311	353.313	348.3	145.633	SE	0.000108662	0.000135828	0.000162993
41	Intact	T	9	91.5674	29.6437	40281.1	1029.74	86.4177	428.686	Lobate-shaped	5195	5263	68	5223.51	12.4585	40.0704	27.6119	24.3081	53.1301	126.87	73.7398	79.9115	E	0.000381412	0.000476765	0.000572118
42	Relict	T	9	91.5677	29.6458	17602.6	538.423	206.161	100.54	Tongue-shaped	5175	5278	103	5211.44	14.0221	41.9338	27.9117	27.3559	19.0577	86.0698	67.0121	64.6845	NE
43	Relict	T	10	91.5727	29.6382	14772.5	523.085	69.123	209.866	Lobate-shaped	5287	5345	58	5313.76	21.5673	38.4005	16.8333	32.5216	288.631	328.496	39.8646	303.161	NW
44	Relict	T	11	91.5745	29.6188	19443.6	691.948	90.6958	291.894	Lobate-shaped	5140	5177	37	5156.41	11.4069	36.1318	24.7249	20.9781	2.02136	358.781	356.76	66.4868	NE
45	Intact	T	8	91.5766	29.4745	14408.1	441.817	129.121	123.48	Tongue-shaped	5223	5268	45	5243.58	7.44872	34.3512	26.9025	20.5659	3.17983	357.797	354.618	102.499	E	0.000111071	0.000138838	0.000166606
46	Intact	T	9	91.5789	29.6165	12335.6	486.653	76.4482	204.323	Lobate-shaped	5188	5217	29	5199.46	10.3197	33.4645	23.1448	22.0861	8.1301	64.179	56.0489	38.2616	NE	9.21861e-05	0.000115233	0.000138279
47	Relict	T	10	91.5837	29.6271	19390.1	542.607	197.53	108.842	Tongue-shaped	5325	5416	91	5364.45	17.6256	39.0705	21.4449	27.9446	304.046	340.224	36.178	324.1	NW
48	Intact	T	10	91.5861	29.6096	6896.87	345.145	65.5954	135.576	Lobate-shaped	5292	5324	32	5303.75	13.0786	40.0829	27.0043	25.012	13.8407	353.29	339.449	70.0031	E	4.58833e-05	5.73541e-05	6.8825e-05
49	Relict	T	10	91.5864	29.662	11714.4	683.828	51.0754	269.229	Lobate-shaped	5283	5332	49	5298.5	16.1793	30.9959	14.8166	24.3349	11.5138	358.363	346.85	89.7195	E
50	Relict	D	8	91.5878	29.6295	31810.9	721.115	126.432	277.871	Lobate-shaped	5224	5302	78	5257.97	10.9967	29.684	18.6874	19.3687	1.08092	359.341	358.261	96.855	E
51	Relict	T	14	91.5888	29.64	34004.1	808.855	271.736	100.041	Tongue-shaped	5100	5191	91	5136.52	6.82641	34.5323	27.7059	18.091	243.435	328.325	84.8896	285.308	W
52	Relict	T	10	91.5911	29.5336	55922.3	1069.22	118.525	410.46	Lobate-shaped	5217	5333	116	5267.55	13.6546	49.3684	35.7138	31.7461	275.947	320.194	44.2476	300.637	NW
53	Relict	T	9	91.592	29.6345	13642.3	433.803	114.921	155.789	Lobate-shaped	5250	5298	48	5274.8	18.5312	33.6776	15.1464	26.9066	2.8624	357.064	354.202	31.9436	NE
54	Relict	D	12	91.5934	29.5968	271370	2504.5	1096.93	291.101	Tongue-shaped	5210	5498	288	5304.61	0.491794	56.708	56.2162	14.6253	0	358.877	358.877	258.756	W
55	Relict	D	12	91.5975	29.4657	165562	1911.57	411.427	758.649	Lobate-shaped	5148	5345	197	5224.04	3.49062	55.9523	52.4617	30.5807	0	359.132	359.132	228.436	SW
56	Intact	T	7	91.5999	29.6005	7719.83	351.456	67.8019	136.122	Lobate-shaped	5290	5318	28	5306	18.369	34.3027	15.9337	27.4876	279.265	310.101	30.8364	294.71	NW	5.25294e-05	6.56617e-05	7.8794e-05
57	Intact	T	12	91.6025	29.5955	3600.23	257.227	40.3294	109.578	Lobate-shaped	5286	5292	6	5289.25	26.2905	27.1925	0.901966	26.7106	353.234	357.51	4.27661	355.009	N	2.10314e-05	2.62893e-05	3.15471e-05
58	Intact	T	9	91.6102	29.5786	13364.9	456.896	126.192	98.8608	Tongue-shaped	5201	5233	32	5220.53	6.65914	30.6238	23.9647	17.9712	8.74616	56.5922	47.846	27.13	NE	0.000101492	0.000126865	0.000152238
59	Intact	T	10	91.619	29.5797	9346.71	376.254	75.4118	135.528	Lobate-shaped	5275	5306	31	5289.45	13.6464	30.4286	16.7823	23.0666	272.121	297.216	25.095	281.934	W	6.60789e-05	8.25986e-05	9.91184e-05
60	Relict	T	12	91.6195	29.6313	6191.82	401.977	40.1185	175.639	Lobate-shaped	5285	5305	20	5292.71	17.8352	32.8302	14.995	25.0936	307.235	327.011	19.7766	319.196	NW
61	Relict	T	13	91.6199	29.6345	41679.9	855.438	161.393	352.058	Lobate-shaped	5209	5278	69	5242.84	8.01356	38.4593	30.4457	20.7112	250.641	340.301	89.6604	287	W
62	Intact	D	10	91.6241	29.5814	91420.9	1474.72	209.464	606.377	Lobate-shaped	5257	5359	102	5299.92	5.30449	46.3367	41.0322	22.2599	4.57392	345.651	341.077	84.6919	E	0.00101983	0.00127479	0.00152974
63	Relict	D	11	91.6243	29.5976	13317.7	577.412	66.3459	261.301	Lobate-shaped	5163	5193	30	5179.25	16.7281	35.984	19.2559	27.8331	1.63658	353.211	351.574	93.3146	E
64	Relict	T	9	91.6268	29.5187	17325.4	556.342	100.001	211.974	Lobate-shaped	5271	5332	61	5299.95	16.92	38.1798	21.2598	25.714	234.567	290.624	56.0569	253.473	W
65	Relict	D	11	91.6277	29.5163	28204.8	626.872	188.326	156.375	Tongue-shaped	5324	5375	51	5344.59	2.19835	36.8978	34.6995	18.4472	1.66028	358.431	356.77	109.614	E
66	Relict	T	9	91.6295	29.5961	1577.02	158.246	31.0392	63.4044	Lobate-shaped	5199	5204	5	5201.5	26.2905	29.1009	2.8104	27.6957	17.0378	18.7498	1.71199	17.8938	N
67	Intact	T	9	91.6296	29.5719	8266.13	343.704	115.199	89.4455	Tongue-shaped	5303	5365	62	5326.8	16.9327	36.2268	19.2941	29.2882	330.843	342.688	11.8453	338.027	N	5.7021e-05	7.12763e-05	8.55316e-05
68	Intact	T	9	91.6323	29.5742	12512.4	440.674	99.0717	174.262	Lobate-shaped	5333	5388	55	5358.94	27.2897	35.6882	8.39849	32.1977	274.185	303.14	28.9553	287.589	W	9.37737e-05	0.000117217	0.000140661
69	Relict	T	10	91.6363	29.5158	12324.1	552.693	72.763	240.254	Lobate-shaped	5280	5336	56	5302.47	22.5601	43.8081	21.2481	34.9317	2.3533	37.6262	35.2729	16.5829	N
70	Relict	T	12	91.6383	29.5213	16540.5	701.461	61.2977	307.052	Lobate-shaped	5278	5324	46	5297.1	16.6279	40.6416	24.0137	32.8309	311.594	356.309	44.7151	330.809	NW
71	Relict	T	11	91.6443	29.5996	14504.2	466.938	136.631	98.8026	Tongue-shaped	5158	5207	49	5182.72	10.7584	27.8613	17.103	20.6695	55.9541	81.5525	25.5984	72.159	E
72	Relict	T	12	91.6446	29.5971	20422.7	634.89	93.1672	262.135	Lobate-shaped	5169	5229	60	5201.39	7.39295	36.7805	29.3876	26.0666	44.0122	81.1796	37.1674	65.072	NE
73	Intact	T	9	91.6508	29.5745	59043.5	1071.99	152.63	396.504	Lobate-shaped	5196	5288	92	5235.9	3.2955	44.8137	41.5182	28.3473	2.21475	356.82	354.605	68.9858	E	0.000603502	0.000754378	0.000905253
74	Relict	T	9	91.6514	29.5327	3673.84	233.157	84.2176	50.0536	Tongue-shaped	5270	5294	24	5283.2	18.9084	26.7978	7.88938	21.0052	40.8653	63.4349	22.5696	56.4237	NE
75	Relict	T	11	91.6545	29.5322	23561.6	696.126	123.422	271.369	Lobate-shaped	5208	5255	47	5231.29	11.0593	42.6207	31.5614	21.5959	2.91084	79.3803	76.4695	40.7521	NE
76	Relict	T	9	91.6567	29.5316	7847.35	349.252	67.8063	127.691	Lobate-shaped	5174	5210	36	5194.11	14.6425	38.9509	24.3084	26.2172	29.0546	75.7355	46.6809	47.4175	NE
77	Relict	T	9	91.657	29.5863	3610.23	252.759	99.0669	51.934	Tongue-shaped	5277	5300	23	5288.25	12.4448	25.0956	12.6507	19.411	48.7153	76.5043	27.789	60.8087	NE
78	Intact	T	8	91.6585	29.5846	4432.81	249.965	61.3829	78.6301	Lobate-shaped	5289	5307	18	5298	11.427	30.4713	19.0443	21.962	7.23692	357.91	350.673	134.597	SE	2.69952e-05	3.37441e-05	4.04929e-05
79	Relict	T	10	91.6632	29.5308	22700.4	792.997	92.8507	335.514	Lobate-shaped	5201	5279	78	5230.19	7.89502	48.2675	40.3725	24.0402	251.095	309.56	58.4642	286.312	W
80	Relict	D	10	91.6664	29.5991	48993	916.66	230.417	291.18	Lobate-shaped	5259	5360	101	5296.04	3.47333	53.2679	49.7946	24.7997	4.14462	357.797	353.653	241.973	SW
81	Relict	T	11	91.667	29.5881	12627.7	470.579	111.122	169.026	Lobate-shaped	5206	5253	47	5223.62	13.7485	37.5401	23.7916	25.133	308.884	349.439	40.5545	330.356	NW
82	Intact	T	9	91.6692	29.4523	5277.17	272.304	78.0999	91.9177	Lobate-shaped	5181	5219	38	5200.75	21.0004	38.1466	17.1462	30.7091	325.739	334.047	8.30774	330.348	NW	3.32778e-05	4.15972e-05	4.99167e-05
83	Relict	T	9	91.6708	29.5296	12245.9	422.463	105.936	146.218	Lobate-shaped	5320	5373	53	5346	16.3625	38.6858	22.3232	27.5577	18.4349	73.8108	55.3758	41.6558	NE
84	Intact	T	9	91.6709	29.4531	4253.08	244.112	56.7058	87.3398	Lobate-shaped	5195	5225	30	5209	21.2499	35.5383	14.2883	29.0647	313.586	332.765	19.1793	322.825	NW	2.56872e-05	3.2109e-05	3.85308e-05
85	Intact	T	8	91.6735	29.4315	7555.15	356.409	58.8124	144.563	Lobate-shaped	5187	5209	22	5194.33	7.88007	30.805	22.925	20.4536	3.99091	41.9059	37.915	25.7505	NE	5.11876e-05	6.39844e-05	7.67813e-05
86	Intact	T	11	91.6736	29.444	18890.8	546.054	106.903	217.109	Lobate-shaped	5177	5205	28	5188.25	5.42701	31.2521	25.825	16.8019	1.68468	358.668	356.983	195.711	S	0.000153735	0.000192169	0.000230603
87	Relict	T	12	91.6744	29.5287	26008	656.233	225.042	118.612	Tongue-shaped	5226	5314	88	5268.58	7.13218	27.6493	20.5171	19.4854	45	112.166	67.1663	70.7788	E
88	Relict	T	11	91.6755	29.5272	13659	486.803	130.734	100.76	Tongue-shaped	5234	5278	44	5246.47	5.41599	30.1538	24.7378	16.1636	20.8545	84.8056	63.9511	58.9997	NE
89	Intact	T	9	91.6759	29.4314	6324.27	292.986	71.8355	102.725	Lobate-shaped	5200	5256	56	5225.38	26.2234	43.4362	17.2127	37.8851	336.638	349.592	12.9543	342.044	N	4.13509e-05	5.16886e-05	6.20264e-05
90	Relict	T	11	91.6773	29.5266	13043	500.599	73.4328	204.482	Lobate-shaped	5221	5264	43	5242.47	19.5793	36.3798	16.8005	27.878	3.12213	358.862	355.74	79.4445	E
91	Relict	T	9	91.6779	29.4579	10801.6	426.875	69.3125	165.905	Lobate-shaped	5243	5270	27	5255.08	14.038	42.9881	28.95	25.9136	286.39	320.572	34.1827	305.265	NW
92	Relict	T	11	91.6796	29.527	8426.27	355.709	73.291	132.765	Lobate-shaped	5215	5251	36	5228.4	20.439	35.4155	14.9765	29.0461	344.578	357.917	13.3396	351.347	N
93	Intact	T	10	91.6799	29.5646	20536	524.936	153.012	176.114	Lobate-shaped	5186	5237	51	5210.45	11.8063	30.8676	19.0613	22.4266	16.2797	55.0806	38.8009	30.7568	NE	0.000169939	0.000212424	0.000254908
94	Intact	D	11	91.68	29.5428	23771.4	632.273	230.412	101.437	Tongue-shaped	5283	5397	114	5337.1	14.3633	45.5994	31.2361	30.0518	6.96542	81.4309	74.4654	36.9122	NE	0.000202553	0.000253192	0.00030383
95	Intact	T	11	91.6808	29.4674	46349.3	917.338	155.807	343.049	Lobate-shaped	5189	5294	105	5238.38	19.3965	41.2045	21.8081	29.602	283.355	344.512	61.1562	316.34	NW	0.000451362	0.000564202	0.000677043
96	Relict	T	9	91.6816	29.5619	17472.7	501.406	129.025	173.007	Lobate-shaped	5223	5271	48	5247.27	12.1115	26.7978	14.6863	19.4248	28.0339	90	61.9661	53.9857	NE
97	Relict	T	8	91.6841	29.5637	20527.4	520.297	153.779	152.099	Tongue-shaped	5207	5263	56	5232.25	12.4585	33.4923	21.0338	23.4882	243.004	305.754	62.7497	276.82	W
98	Intact	T	10	91.6851	29.4341	25879	753.136	102.156	293.141	Lobate-shaped	5256	5340	84	5286.33	16.468	44.3415	27.8734	30.2135	271.848	311.027	39.1799	292.888	NW	0.000224289	0.000280362	0.000336434
99	Relict	T	9	91.6891	29.5822	20864.5	861.244	67.9131	370.724	Lobate-shaped	5115	5171	56	5143.36	8.06484	41.9857	33.9209	25.7886	256.535	301.799	45.2641	279.384	W
100	Relict	T	11	91.6897	29.5541	8243.1	359.811	71.8142	138.711	Lobate-shaped	5247	5283	36	5266	12.8523	26.9238	14.0715	20.6426	16.3895	61.9275	45.538	41.336	NE
101	Relict	T	12	91.6915	29.5549	8701.74	340.122	99.7326	106.056	Lobate-shaped	5241	5271	30	5253.7	8.73623	30.4353	21.6991	22.3978	310.815	349.902	39.0874	329.937	NW
102	Intact	T	9	91.6927	29.4518	12194.6	425.532	157.948	90.6427	Tongue-shaped	5249	5332	83	5281	13.1474	42.753	29.6056	31.5534	0	356.553	356.553	269.588	W	9.09233e-05	0.000113654	0.000136385
103	Intact	T	9	91.6937	29.4529	5615.92	297.529	54.5451	115.448	Lobate-shaped	5240	5280	40	5259.33	18.9497	30.5351	11.5855	26.4114	292.329	319.699	27.37	310.389	NW	3.58573e-05	4.48217e-05	5.3786e-05
104	Intact	T	9	91.6948	29.4548	10918	419.19	91.9969	165.323	Lobate-shaped	5229	5268	39	5248.64	13.5846	33.5311	19.9465	26.2791	293.749	313.698	19.9486	306.942	NW	7.96241e-05	9.95302e-05	0.000119436
105	Relict	T	9	91.7054	29.4349	8661.04	357.098	96.0924	94.6131	Tongue-shaped	5149	5183	34	5163.8	12.2748	34.7361	22.4613	23.267	31.3287	72.8973	41.5686	49.8005	NE
106	Relict	T	9	91.7163	29.5213	17030.2	513.099	105.79	178.17	Lobate-shaped	5166	5258	92	5203.24	15.0773	45.8323	30.755	37.5467	1.10171	30.6507	29.549	9.38426	N
107	Intact	T	10	91.7396	29.425	8322.11	414.079	69.7537	157.921	Lobate-shaped	5208	5260	52	5227.1	11.9933	44.8008	32.8075	29.8173	257.574	316.283	58.7085	288.669	W	5.74847e-05	7.18559e-05	8.62271e-05
108	Intact	T	11	91.7404	29.5368	18043.3	511.701	122.233	182.175	Lobate-shaped	5237	5306	69	5270.09	22.1541	43.0286	20.8745	30.6633	1.93059	359.132	357.201	136.441	SE	0.000145496	0.00018187	0.000218244
109	Relict	T	11	91.7466	29.5483	14996.9	496.909	92.0848	172.675	Lobate-shaped	5257	5312	55	5277.78	18.173	41.4697	23.2967	32.0718	5.7928	20.9657	15.1729	13.2567	N
110	Intact	T	11	91.7467	29.4304	14759.5	455.745	139.404	117.069	Tongue-shaped	5238	5315	77	5272.5	20.8172	45.4218	24.6046	35.326	304.177	331.699	27.5222	315.916	NW	0.000114329	0.000142912	0.000171494
111	Relict	T	12	91.7481	29.433	10827.5	403.624	119.803	97.0475	Tongue-shaped	5166	5219	53	5185.5	11.9218	43.67	31.7482	24.6277	287.592	319.927	32.3347	302.084	NW
112	Relict	T	9	91.7488	29.5476	13643	479.557	104.351	161.511	Lobate-shaped	5219	5293	74	5251.56	14.3517	47.7873	33.4355	32.7622	27.1981	67.3062	40.1081	39.5349	NE
113	Relict	T	9	91.7503	29.5468	3893.06	228.432	71.4064	65.1145	Tongue-shaped	5236	5265	29	5250.5	31.1871	36.5056	5.31848	34.3379	11.1649	19.29	8.12516	15.768	N
114	Relict	T	11	91.7519	29.42	3976.98	280.291	44.9953	118.363	Lobate-shaped	5165	5182	17	5173.33	17.3514	31.1603	13.8089	23.4095	290.283	298.523	8.24057	294.607	NW
115	Relict	T	15	91.7526	29.4111	23953	803.405	87.7757	342.193	Lobate-shaped	5059	5103	44	5079.07	9.74714	34.2774	24.5302	19.0491	0	359.012	359.012	117.587	SE
116	Relict	T	10	91.753	29.4214	6245.07	375.652	59.4404	154.656	Lobate-shaped	5172	5192	20	5180.62	11.2448	36.4511	25.2063	22.0981	283.736	308.868	25.1315	299.556	NW
117	Relict	T	10	91.7542	29.4227	5727.4	339.839	55.1691	143.992	Lobate-shaped	5193	5225	32	5204.67	12.6213	40.1795	27.5583	28.3924	278.13	291.869	13.7385	283.667	W
118	Relict	T	12	91.7556	29.424	12603.7	453.24	103.612	134.795	Lobate-shaped	5230	5296	66	5255.47	26.475	49.2844	22.8094	38.704	276.691	317.095	40.404	295.2	NW
119	Relict	T	12	91.7556	29.382	27831.2	643.437	206.512	199.904	Tongue-shaped	5131	5251	120	5171.55	11.9933	53.7746	41.7813	28.3152	19.9325	60.124	40.1915	37.8492	NE
120	Relict	T	10	91.7557	29.4249	5547.57	303.223	108.78	58.1397	Tongue-shaped	5219	5270	51	5242.5	16.1255	39.4039	23.2784	28.5983	270	289.398	19.3978	278.406	W
121	Relict	T	12	91.7559	29.4106	16613.5	554.358	181.196	159.563	Tongue-shaped	5089	5183	94	5122.68	14.1172	42.1564	28.0392	26.5949	286.631	332.65	46.0192	310.718	NW
122	Relict	T	12	91.7573	29.4112	16273.5	492.626	176.846	122.742	Tongue-shaped	5110	5178	68	5136.79	14.1172	39.876	25.7588	26.3703	297.499	341.928	44.4285	325.144	NW
123	Relict	T	12	91.7576	29.3808	43905.1	880.066	330.714	127.314	Tongue-shaped	5104	5207	103	5148.92	10.2295	40.4378	30.2082	20.1062	28.54	112.011	83.4713	74.8493	E
124	Relict	T	9	91.7581	29.3538	15643.9	520.65	169.593	154.598	Tongue-shaped	5069	5187	118	5110.42	28.5355	41.7131	13.1776	34.9494	1.99788	29.6237	27.6259	10.6578	N
125	Relict	T	11	91.759	29.441	10834.2	397.268	122.451	91.9177	Tongue-shaped	5244	5318	74	5283.38	28.103	45.4494	17.3464	37.1112	0.268992	349.484	349.215	186.806	S
126	Relict	T	11	91.7595	29.4121	15177.1	473.683	166.351	101.781	Tongue-shaped	5152	5249	97	5187.72	5.42701	49.5881	44.1611	30.878	288.435	347.005	58.5704	324.187	NW
127	Intact	T	11	91.76	29.4284	19645.7	537.23	181.059	118.609	Tongue-shaped	5249	5352	103	5294.39	11.4069	41.2753	29.8684	30.1193	2.88296	358.243	355.36	33.3145	NE	0.000161136	0.00020142	0.000241704
128	Relict	T	11	91.7602	29.4423	9840.01	369.971	122.27	102.784	Tongue-shaped	5213	5286	73	5243.85	22.4361	40.2762	17.8401	32.9358	307.372	336.038	28.6656	318.076	NW
129	Relict	T	12	91.7604	29.4486	26219.6	734.944	98.6005	307.006	Lobate-shaped	5112	5191	79	5147.17	13.3849	40.8839	27.4991	25.6317	263.157	315	51.8428	297.43	NW
130	Relict	T	11	91.7609	29.4435	29135.2	660.47	253.939	133.608	Tongue-shaped	5192	5377	185	5268.79	16.1658	49.9937	33.8279	36.3758	289.855	321.483	31.6278	307.531	NW
131	Relict	T	13	91.7612	29.4004	21460.9	903.531	76.7469	398.69	Lobate-shaped	5104	5187	83	5142.59	14.9414	41.1327	26.1913	28.3628	0.556251	349.695	349.139	79.4249	E
132	Relict	T	11	91.7625	29.4133	22460.9	583.787	126.168	212.006	Lobate-shaped	5220	5321	101	5268.56	17.7098	49.4941	31.7843	36.6677	273.077	311.673	38.5952	296.251	NW
133	Intact	T	11	91.7638	29.4302	4528.15	250.061	58.9323	86.2113	Lobate-shaped	5226	5262	36	5243.8	27.7502	48.9489	21.1988	41.1323	326.454	331.763	5.30865	329.904	NW	2.76935e-05	3.46168e-05	4.15402e-05
134	Relict	T	12	91.7649	29.4601	42515	902.506	331.318	96.3812	Tongue-shaped	5015	5166	151	5073.76	7.40094	42.7972	35.3963	25.9846	1.18526	356.878	355.693	78.0369	E
135	Relict	T	10	91.7663	29.4528	23844.3	619.039	163.176	200.042	Lobate-shaped	5113	5164	51	5143.1	11.1782	27.0177	15.8395	17.8405	43.4089	356.878	313.469	88.0052	E
136	Relict	T	11	91.7667	29.4464	10427.7	405.191	153.803	81.7839	Tongue-shaped	5219	5303	84	5258.15	21.76	39.1853	17.4252	33.1124	271.618	304.749	33.1307	287.304	W
137	Relict	T	11	91.7668	29.4491	37190.9	889.284	114.611	364.272	Lobate-shaped	5168	5280	112	5215.1	13.597	44.1664	30.5694	33.5869	274.686	327.171	52.4855	293.536	NW
138	Relict	T	11	91.7687	29.4567	22853.3	623.192	207.681	111.014	Tongue-shaped	5089	5204	115	5135.86	16.9739	37.3359	20.362	27.5516	242.354	318.691	76.3374	281.389	W
139	Relict	T	10	91.7706	29.4229	7481.95	344.972	126.104	76.025	Tongue-shaped	5164	5240	76	5201.33	22.2361	42.5809	20.3447	34.1257	2.46282	357.122	354.659	86.1423	E
140	Relict	T	8	91.7756	29.715	45884.7	857.672	181.042	293.05	Lobate-shaped	5049	5160	111	5093.42	18.1469	40.8246	22.6777	29.7134	283.186	344.268	61.0822	307.928	NW
141	Relict	T	9	91.7762	29.5189	17078	510.768	189.896	102.699	Tongue-shaped	5134	5227	93	5179.25	14.2585	44.7783	30.5199	31.1833	303.69	355.156	51.4659	321.352	NW
142	Relict	D	11	91.7767	29.6097	41313.2	1009.35	112.068	464.609	Lobate-shaped	4976	5088	112	5033.12	9.02632	30.3684	21.3421	19.6463	0	359.326	359.326	174.813	S
143	Relict	T	13	91.7782	29.5088	26986.8	741.435	95.9899	316.33	Lobate-shaped	5101	5161	60	5134.26	14.7629	44.4136	29.6507	29.0613	0	358.764	358.764	192.613	S
144	Relict	T	9	91.7786	29.5238	5870.19	285.496	89.4294	71.1703	Tongue-shaped	5100	5155	55	5125.75	27.6034	37.074	9.47056	32.8006	293.385	309.931	16.5453	301.969	NW
145	Relict	T	11	91.7825	29.4284	6913.98	318.327	97.652	79.3417	Tongue-shaped	5099	5148	49	5125.14	26.0466	35.4352	9.3886	31.9706	312.818	333.75	20.9314	325.604	NW
146	Relict	T	12	91.7837	29.4296	9485.9	399.815	66.9258	155.512	Lobate-shaped	5100	5136	36	5117.58	16.5106	29.8454	13.3347	22.3326	272.49	321.072	48.5829	296.784	NW
147	Relict	T	11	91.7876	29.4323	43556.5	828.522	267.928	208.274	Tongue-shaped	5005	5112	107	5042.63	8.40064	49.66	41.2594	21.2067	2.92498	359.697	356.772	138.916	SE
148	Relict	T	11	91.7897	29.4312	28760	757.999	275.87	133.646	Tongue-shaped	5047	5184	137	5107.56	14.1684	41.4415	27.2731	29.0455	1.54816	359.045	357.497	210.157	SW
149	Relict	T	9	91.7941	29.4528	11845.2	451.646	162.715	78.3917	Tongue-shaped	5151	5221	70	5182.12	12.4037	40.3168	27.9131	24.7508	4.96974	357.274	352.304	59.0494	NE
150	Relict	T	9	91.7953	29.4531	8501.02	378.397	147.05	78.5247	Tongue-shaped	5156	5243	87	5187	12.344	47.7574	35.4134	31.8883	293.003	341.274	48.2716	313.146	NW
151	Relict	T	9	91.7985	29.5494	10296.5	409.995	78.0617	161.148	Lobate-shaped	5191	5265	74	5220.33	25.5169	48.5351	23.0182	35.7967	292.932	321.624	28.6919	307.769	NW
152	Relict	T	10	91.8014	29.5507	9935.4	378.699	128.314	76.1667	Tongue-shaped	5210	5302	92	5243.92	16.468	49.5862	33.1182	38.2525	295.821	342.626	46.805	324.305	NW
153	Relict	T	9	91.8022	29.5511	10319.8	430.88	170.636	67.6046	Tongue-shaped	5207	5312	105	5244.5	16.2762	52.5178	36.2416	29.7063	256.139	297.408	41.2686	278.933	W
154	Intact	T	10	91.8038	29.7185	6942.98	343.948	66.1601	140.861	Lobate-shaped	5103	5135	32	5119	25.0567	37.5124	12.4557	32.8445	308.494	316.206	7.71167	312.622	NW	4.62517e-05	5.78146e-05	6.93776e-05
155	Relict	T	10	91.8115	29.5556	6338.47	305.563	86.66	77.9082	Tongue-shaped	5244	5297	53	5266.86	22.8966	45.2408	22.3442	36.7238	309.936	322.431	12.495	316.728	NW
156	Relict	D	12	91.8167	29.714	21224.8	637.761	204.775	160.854	Tongue-shaped	5082	5181	99	5114.75	12.9224	41.69	28.7676	27.8436	4.3987	359.17	354.771	308.494	NW
157	Relict	T	9	91.8193	29.7173	6771.23	320.293	102.145	69.7657	Tongue-shaped	5016	5072	56	5041.88	21.0315	37.6571	16.6256	31.9181	297.051	317.027	19.9767	307.846	NW
158	Relict	T	11	91.8195	29.4638	14647.3	467.657	110.462	158.307	Lobate-shaped	5062	5123	61	5088.18	5.90118	43.1849	37.2837	27.3513	297.284	355.365	58.0803	318.725	NW
159	Relict	T	10	91.8201	29.4588	12758.2	601.811	62.3828	257.466	Lobate-shaped	5087	5142	55	5116.53	6.65022	43.2618	36.6116	29.1556	27.3682	83.6598	56.2916	46.9251	NE
160	Relict	T	13	91.8242	29.5363	19937.1	551.536	108.307	215.803	Lobate-shaped	5160	5233	73	5191	8.52554	48.2458	39.7202	27.3715	0	358.069	358.069	138.648	SE
161	Relict	T	9	91.8245	29.4581	10039.2	377.511	90.7676	130.706	Lobate-shaped	5050	5092	42	5070.91	22.8605	35.8483	12.9878	30.2677	334.983	358.958	23.9753	345.132	N
162	Relict	T	10	91.8255	29.5552	42560.8	890.611	143.584	363.256	Lobate-shaped	5060	5160	100	5096.82	19.9821	43.4673	23.4852	30.7644	281.575	310.956	29.3803	295.629	NW
163	Relict	T	9	91.8291	29.5553	24145.3	622.763	136.976	201.971	Lobate-shaped	5144	5212	68	5168.48	7.72892	38.8876	31.1587	22.8309	8.37867	81.2538	72.8752	36.9001	NE
164	Relict	T	9	91.8311	29.5395	6389.39	330.323	126.19	59.6432	Tongue-shaped	5198	5254	56	5219.86	12.7285	39.6813	26.9529	26.9397	2.04541	356.738	354.693	67.2291	NE
165	Relict	T	11	91.8335	29.5921	26437.9	615.479	156.168	178.618	Lobate-shaped	5139	5227	88	5173.84	12.9005	50.2277	37.3272	29.0107	292.249	347.005	54.7563	314.874	NW
166	Intact	T	10	91.8351	29.5405	20039.9	632.759	81.4428	244.771	Lobate-shaped	5186	5243	57	5208.58	9.69927	42.6603	32.9611	28.6164	15.7247	351.529	335.804	307.256	NW	0.000165024	0.00020628	0.000247535
167	Relict	T	10	91.8393	29.5506	12677.7	421.559	105.846	151.807	Lobate-shaped	5198	5249	51	5216.07	5.90118	41.7091	35.8079	25.9535	309.611	355.236	45.6257	332.297	NW
168	Relict	T	11	91.8414	29.5337	15405.7	569.259	233.055	90.0082	Tongue-shaped	5095	5227	132	5142.15	16.5139	41.6264	25.1125	29.3313	286.113	321.981	35.8676	300.668	NW
169	Relict	T	10	91.8469	29.5419	28212.4	750.329	285.517	104.572	Tongue-shaped	5039	5103	64	5065.58	17.8827	40.1386	22.2559	29.0886	266.468	310.101	43.6332	294.207	NW
170	Relict	T	11	91.8479	29.6178	8439.64	398.526	69.0468	167.668	Lobate-shaped	5141	5161	20	5151.56	13.4226	28.256	14.8335	17.1026	313.698	341.854	28.1564	323.599	NW
171	Relict	T	9	91.8574	29.5922	29852.5	670.48	147.694	234.671	Lobate-shaped	5081	5141	60	5107.36	8.46334	39.9354	31.4721	23.2344	22.0679	66.6148	44.5469	40.8335	NE
172	Intact	T	9	91.8659	29.6251	13550.3	428.754	115.243	136.097	Lobate-shaped	5183	5228	45	5205.81	21.7874	41.6926	19.9052	28.217	3.07745	356.804	353.727	220.674	SW	0.000103183	0.000128979	0.000154775
173	Relict	T	12	91.8802	29.5811	13176.7	455.382	91.0934	169.174	Lobate-shaped	5242	5269	27	5257.06	12.3486	37.0944	24.7457	22.286	0.451138	359.626	359.174	183.335	S
174	Relict	T	9	91.882	29.5813	7334.81	322.937	108.099	78.1501	Tongue-shaped	5236	5299	63	5264.9	17.5651	41.4697	23.9045	32.8837	1.23641	356.634	355.397	250.076	W
175	Relict	T	10	91.8925	29.3654	20321	555.311	197.447	126.606	Tongue-shaped	5016	5094	78	5052.46	15.1465	44.5895	29.4431	29.5436	0	355.559	355.559	171.021	S
176	Relict	T	7	91.8941	29.3674	26106.7	615.232	196.939	181.03	Tongue-shaped	5002	5112	110	5041.86	14.0856	45.5183	31.4327	32.1247	259.418	302.705	43.2864	282.041	W
177	Relict	T	8	91.9193	29.5548	29867.9	878.497	94.7175	378.969	Lobate-shaped	5193	5252	59	5213	10.006	34.9515	24.9455	24.3749	0	357.166	357.166	96.9872	E
178	Relict	T	8	91.9256	29.4968	13602.3	446.156	155.104	103.433	Tongue-shaped	5080	5181	101	5123.33	22.8605	43.3383	20.4778	31.9152	280.069	309.719	29.6497	295.262	NW
179	Intact	T	10	91.9379	29.4905	8218.85	370.092	136.169	64.5659	Tongue-shaped	5079	5155	76	5104.55	3.47333	49.9915	46.5182	31.7608	50.0538	135	84.9462	74.0796	E	5.66299e-05	7.07873e-05	8.49448e-05
180	Intact	T	10	91.9413	29.4899	26034.6	624.227	232.308	140.769	Tongue-shaped	5114	5247	133	5185.78	12.6616	40.1708	27.5092	31.5777	0.763898	358.363	357.6	337.492	NW	0.000225909	0.000282386	0.000338863
181	Relict	T	10	91.9459	29.6551	33375.9	678.446	229.663	165.965	Tongue-shaped	5149	5244	95	5189.92	5.89107	43.1855	37.2944	24.7035	0	353.841	353.841	296.418	NW
182	Relict	T	13	91.9467	29.5241	57238.6	1269.11	110.396	564.491	Lobate-shaped	5151	5249	98	5197.71	6.13872	48.1649	42.0262	29.3376	0.806929	358.025	357.218	300.157	NW
183	Relict	T	12	91.9476	29.3747	36887	823.881	322.169	147.633	Tongue-shaped	5128	5247	119	5176.43	6.3858	40.3565	33.9707	28.0104	2.08256	355.601	353.519	267.884	W
184	Relict	T	12	91.9521	29.6443	12676.6	456.289	94.628	141.128	Lobate-shaped	5275	5331	56	5299.87	15.9252	31.1603	15.2351	23.3151	27.4744	61.5873	34.1129	43.7665	NE
185	Relict	D	9	91.9531	29.3727	4438.44	270.709	56.2512	89.2882	Lobate-shaped	5238	5250	12	5244.75	15.0882	23.038	7.94982	20.1169	47.454	346.185	298.731	262.839	W
186	Relict	T	11	91.9531	29.5068	13075.9	420.471	111.62	145.57	Lobate-shaped	5190	5239	49	5212.31	16.9612	38.0675	21.1062	27.527	342.924	356.698	13.7745	350.246	N
187	Relict	T	8	91.9568	29.6454	18040.8	513.725	152.859	135.045	Tongue-shaped	5186	5299	113	5229.27	17.0244	49.6859	32.6615	33.6868	297.091	338.749	41.6588	314.405	NW
188	Intact	T	9	91.9569	29.5032	9871.02	368.353	118.722	88.3761	Tongue-shaped	5222	5286	64	5253.45	24.6116	39.5816	14.97	31.5481	3.25194	357.184	353.933	134.603	SE	7.05516e-05	8.81895e-05	0.000105827
189	Relict	T	11	91.9576	29.6466	9149.4	352.683	87.589	114.885	Lobate-shaped	5182	5227	45	5203.3	20.3192	40.2436	19.9244	31.1046	286.518	314.061	27.543	298.566	NW
190	Relict	T	8	91.9602	29.363	11230.3	421.257	83.0591	146.065	Lobate-shaped	5158	5202	44	5175.92	20.3792	38.9762	18.597	29.3238	272.961	319.686	46.725	304.467	NW
191	Relict	T	9	91.9609	29.3673	30121	734.562	124.15	271.241	Lobate-shaped	5136	5205	69	5169.61	18.9634	37.1794	18.216	29.1451	249.928	304.854	54.926	284.028	W
192	Intact	T	9	91.9619	29.3401	5201.2	284.31	103.474	64.1088	Tongue-shaped	5136	5170	34	5152	15.3662	25.8308	10.4646	19.6974	337.891	352.093	14.2023	345.826	N	3.27037e-05	4.08796e-05	4.90555e-05
193	Relict	T	11	91.9624	29.6428	14896.1	457.418	155.025	95.7718	Tongue-shaped	5190	5239	49	5206.29	4.39024	34.697	30.3067	17.853	42.4209	84.5597	42.1388	60.7568	NE
194	Relict	T	10	91.9628	29.5421	12281.3	442.241	154.745	100.192	Tongue-shaped	5175	5277	102	5212.4	10.5907	49.7681	39.1774	34.3563	278.924	350.754	71.8299	307.175	NW
195	Intact	T	11	91.9629	29.5752	12069.2	407.771	104.284	142.451	Lobate-shaped	5174	5249	75	5207.77	23.0968	47.8214	24.7246	33.5048	3.36646	358.002	354.636	151.445	SE	8.98022e-05	0.000112253	0.000134703
196	Relict	T	9	91.9637	29.644	7186.59	315.572	91.4091	88.1222	Tongue-shaped	5159	5210	51	5187	21.4187	37.1874	15.7686	29.8895	286.858	323.219	36.3608	302.139	NW
197	Intact	T	10	91.9637	29.3412	15329.7	461.703	109.895	165.83	Lobate-shaped	5141	5205	64	5172.35	22.1452	35.4027	13.2575	30.7256	295.71	316.481	20.7715	304.771	NW	0.00011965	0.000149562	0.000179475
198	Relict	T	12	91.9649	29.5472	15392.3	632.722	63.0485	270.48	Lobate-shaped	5111	5184	73	5142.61	18.742	42.6993	23.9573	30.1408	304.695	343.346	38.6505	323.556	NW
199	Relict	D	10	91.9652	29.649	23624.2	579.85	160.371	178.999	Lobate-shaped	5108	5185	77	5136.52	8.73623	43.0177	34.2815	26.4059	264.644	309.401	44.7565	291.77	W
200	Intact	T	9	91.9665	29.5066	20721.7	583.086	129.341	240.963	Lobate-shaped	5205	5273	68	5225.54	3.74016	42.2325	38.4923	25.3707	2.23117	348.024	345.793	291.562	W	0.000171784	0.00021473	0.000257676
201	Relict	T	12	91.9704	29.5309	7709.45	360.996	65.8467	134.662	Lobate-shaped	5280	5312	32	5295	12.7285	48.8407	36.1122	31.0641	309.413	354.053	44.6404	326.574	NW
202	Relict	T	9	91.9711	29.5805	29445.7	713.165	140.205	285.414	Lobate-shaped	5163	5238	75	5188.8	3.57575	40.7615	37.1857	24.1674	1.54816	64.44	62.8919	27.9794	NE
203	Relict	T	11	91.9721	29.5159	20991.1	532.822	146.518	163.935	Lobate-shaped	5183	5240	57	5204.73	11.2244	36.7443	25.5199	23.0367	1.66834	359.119	357.45	33.9951	NE
204	Relict	T	11	91.9723	29.5385	34468	768.806	154.8	283.84	Lobate-shaped	5179	5256	77	5202.77	6.92989	49.3806	42.4507	25.527	260.754	357.138	96.3837	313.455	NW
205	Relict	T	11	91.977	29.5218	24779.2	732.29	115.144	311.974	Lobate-shaped	5249	5280	31	5264.93	4.22301	29.6966	25.4736	15.4531	215.538	328.707	113.169	287.43	W
206	Relict	T	9	91.9776	29.5345	13418	452.989	103.584	175.141	Lobate-shaped	5239	5328	89	5271.53	6.12901	51.7589	45.6299	34.6244	2.29061	356.082	353.791	309.348	NW
207	Relict	T	9	91.9819	29.5741	16956.8	528.54	86.7796	218.625	Lobate-shaped	5297	5342	45	5322.74	15.2189	40.3882	25.1693	27.1223	248.86	324.123	75.2627	286.789	W
208	Intact	T	10	91.982	29.5094	4693.67	265.427	51.2613	99.1814	Lobate-shaped	5263	5296	33	5278.4	23.6239	34.1532	10.5293	28.7292	317.386	348.69	31.3041	335.11	NW	2.89127e-05	3.61408e-05	4.3369e-05
209	Intact	T	9	91.9831	29.5803	8795.97	351.546	120.532	86.6972	Tongue-shaped	5259	5314	55	5279.7	16.3294	46.1141	29.7847	30.4321	308.13	328.173	20.0425	318.515	NW	6.14346e-05	7.67933e-05	9.21519e-05
210	Intact	T	8	91.9832	29.4949	6971.78	302.211	93.4236	87.2989	Tongue-shaped	5227	5255	28	5236.75	6.50571	33.3586	26.8529	16.5877	3.81407	359.17	355.356	100.973	E	4.6482e-05	5.81025e-05	6.9723e-05
211	Intact	T	9	91.9867	29.4733	12979.5	420.961	111.975	129.884	Lobate-shaped	5217	5263	46	5232.75	8.68913	37.6297	28.9405	21.3685	2.81556	356.496	353.681	42.9727	NE	9.799e-05	0.000122488	0.000146985
212	Intact	T	11	91.987	29.5619	7105.12	330.592	113.354	66.9888	Tongue-shaped	5236	5303	67	5261.56	8.06484	47.3886	39.3238	30.5072	32.0054	43.0802	11.0748	36.0348	NE	4.75508e-05	5.94385e-05	7.13262e-05
213	Relict	T	9	91.9887	29.6478	29709.9	657.278	224.879	137.017	Tongue-shaped	5102	5169	67	5126.73	3.69162	33.8348	30.1432	16.2213	26.5651	114.775	88.2101	63.8027	NE
214	Intact	T	11	91.9892	29.5568	13859.9	443.712	128.205	133.542	Lobate-shaped	5276	5343	67	5303.29	15.334	47.8537	32.5197	31.0798	13.2011	358.264	345.063	323.992	NW	0.00010602	0.000132525	0.000159029
215	Relict	D	11	91.9907	29.5967	41569.6	796.372	343.536	231.552	Tongue-shaped	5213	5268	55	5240.02	6.3858	36.1148	29.729	14.9661	0	359.193	359.193	194.268	S
216	Relict	T	9	91.9913	29.6481	36222.4	765.714	281.378	154.832	Tongue-shaped	5117	5244	127	5164.09	9.5052	41.5118	32.0066	25.0842	247.166	303.408	56.2415	280.277	W
217	Intact	D	12	91.9924	29.6347	68331.5	1052.66	370.459	225.856	Tongue-shaped	5237	5389	152	5299.37	9.16132	41.3937	32.2324	21.2358	239.676	345.872	106.196	299.567	NW	0.000719147	0.000898933	0.00107872
218	Intact	D	12	91.9938	29.5961	79510.2	1077.31	301.943	325.111	Lobate-shaped	5254	5368	114	5299.59	1.73826	43.6746	41.9363	19.738	5.38931	359.421	354.032	225.198	SW	0.000862542	0.00107818	0.00129381
219	Intact	D	11	91.996	29.5583	20619.9	573.236	219.574	114.776	Tongue-shaped	5238	5328	90	5275.78	9.79476	46.4443	36.6496	23.3759	6.84277	62.5256	55.6828	26.8073	NE	0.000170772	0.000213465	0.000256158
220	Intact	T	9	91.9977	29.5817	33074	757.131	123.267	290.5	Lobate-shaped	5252	5342	90	5294.6	11.4521	38.0064	26.5543	28.0763	17.5009	59.0362	41.5354	33.4882	NE	0.000301062	0.000376328	0.000451594
221	Intact	T	9	91.9986	29.5268	15006.1	474.444	139.588	134.29	Tongue-shaped	5254	5314	60	5287.61	21.641	37.2824	15.6415	29.086	1.84761	47.9815	46.1339	16.1346	N	0.000116626	0.000145782	0.000174938
222	Relict	D	11	92.0051	29.5571	21300.3	574.602	191.997	132.614	Tongue-shaped	5267	5336	69	5296.77	11.9695	35.5255	23.556	20.9924	4.52477	355.192	350.667	210.14	SW
223	Relict	T	9	92.0079	29.5578	10665.4	438.742	183.294	71.4906	Tongue-shaped	5293	5379	86	5337.93	19.8275	37.2798	17.4523	28.8974	336.038	352.875	16.8375	343.665	N
224	Intact	T	10	92.0105	29.6305	15142.8	573.461	76.2159	244.555	Lobate-shaped	5233	5266	33	5249.88	7.65216	34.2806	26.6284	18.6422	0.98776	359.256	358.268	93.2473	E	0.000117901	0.000147377	0.000176852
225	Intact	T	10	92.0252	29.6474	7325.87	325.793	71.1579	115.117	Lobate-shaped	5382	5408	26	5392.4	8.23812	24.5276	16.2894	15.3158	285.832	348.024	62.1915	305.938	NW	4.93292e-05	6.16615e-05	7.39937e-05
226	Intact	D	9	92.0267	29.6676	138505	2270.9	1028	167.751	Tongue-shaped	4756	5184	428	4968.26	7.33673	44.3459	37.0091	23.688	4.89909	356.309	351.41	303.901	NW	0.00167893	0.00209866	0.00251839
227	Intact	T	11	92.0273	29.6234	10387.8	418.908	159.717	77.1303	Tongue-shaped	5274	5328	54	5299.38	13.7322	35.5216	21.7894	24.8519	2.83411	50.856	48.0219	28.758	NE	7.50069e-05	9.37587e-05	0.00011251
228	Intact	D	9	92.0296	29.6232	10892	437.355	155.582	86.9633	Tongue-shaped	5271	5341	70	5290.77	10.3477	47.6936	37.3459	27.3493	0.447613	357.397	356.95	90.0219	E	7.93966e-05	9.92458e-05	0.000119095
229	Intact	D	11	92.0305	29.624	19725.9	527.737	148.418	161.517	Lobate-shaped	5240	5278	38	5259.13	7.83505	40.8923	33.0572	17.0294	0.784824	357.184	356.4	209.117	SW	0.000161926	0.000202407	0.000242889
230	Intact	T	11	92.0328	29.6266	43782.8	955.064	143.277	382.846	Lobate-shaped	5187	5262	75	5216.98	12.0691	40.0093	27.9403	21.0487	288.435	328.736	40.3013	308.802	NW	0.000421538	0.000526923	0.000632307
231	Intact	T	11	92.0336	29.6293	32837.6	826.476	129.126	336.719	Lobate-shaped	5184	5222	38	5195.88	1.25366	37.5677	36.314	15.7032	66.8014	338.199	271.397	280.636	W	0.000298482	0.000373103	0.000447723
232	Intact	T	10	92.0343	29.5099	47066.6	867.38	179.374	318.211	Lobate-shaped	5211	5288	77	5239.78	3.74016	47.8472	44.1071	22.4014	256.43	342.979	86.5499	316.209	NW	0.000459756	0.000574695	0.000689635
233	Intact	T	9	92.0353	29.534	6393.56	298.861	89.8672	75.9644	Tongue-shaped	5294	5345	51	5318.5	33.9894	45.7304	11.741	38.9646	290.659	306.151	15.4918	297.123	NW	4.18951e-05	5.23689e-05	6.28427e-05
234	Intact	T	9	92.0355	29.5545	15343.9	462.62	145.046	126.611	Tongue-shaped	5227	5293	66	5250.24	9.18043	38.246	29.0656	25.4584	0	349.287	349.287	29.6806	NE	0.000119783	0.000149729	0.000179675
235	Intact	T	9	92.0372	29.5828	65685.2	1087.36	179.593	448.687	Lobate-shaped	5209	5276	67	5237	2.53008	31.0642	28.5341	20.233	211.504	358.152	146.648	274.104	W	0.000685857	0.000857321	0.00102879
236	Intact	T	9	92.0377	29.5109	11284.9	401.336	116.612	108.203	Tongue-shaped	5236	5290	54	5256.86	7.63671	46.49	38.8533	26.535	39.8056	359.17	319.364	327.067	NW	8.2846e-05	0.000103557	0.000124269
237	Intact	T	9	92.039	29.4387	14194.7	439.23	124.394	140.869	Lobate-shaped	5067	5107	40	5081.17	6.57837	44.7982	38.2198	21.0214	4.57392	354.56	349.986	49.8538	NE	0.0001091	0.000136375	0.00016365
238	Intact	T	11	92.0403	29.5377	16315.2	640.88	77.8088	278.023	Lobate-shaped	5317	5379	62	5344.29	20.9163	36.5782	15.6619	27.1855	282.319	318.752	36.4323	298.862	NW	0.000128938	0.000161173	0.000193408
239	Intact	D	11	92.0432	29.6254	71527.6	1091.25	245.055	409.414	Lobate-shaped	5183	5236	53	5207.71	4.62959	33.2024	28.5729	13.5814	236.31	344.427	108.118	289.388	W	0.000759697	0.000949622	0.00113955
240	Intact	T	10	92.0463	29.5258	12648.6	435.319	106.721	115.48	Lobate-shaped	5294	5341	47	5317.13	11.3211	37.8471	26.526	26.5997	303.917	329.036	25.1188	314.428	NW	9.50001e-05	0.00011875	0.0001425
241	Intact	T	10	92.0472	29.5269	17890.7	503.772	155.174	124.697	Tongue-shaped	5292	5333	41	5306.09	2.77989	35.9955	33.2156	16.2133	290.556	331.905	41.3491	313.656	NW	0.000144021	0.000180026	0.000216031
242	Intact	D	10	92.052	29.5745	32696	816.23	101.191	317.549	Lobate-shaped	5267	5326	59	5293.81	11.8401	37.2587	25.4186	26.1479	281.31	325.561	44.2511	307.711	NW	0.000296939	0.000371173	0.000445408
243	Intact	T	9	92.0539	29.5816	91820.4	2403.28	109.602	1134.37	Lobate-shaped	5172	5282	110	5227.18	9.57239	34.5863	25.0139	21.0309	240.945	317.386	76.4406	289.533	W	0.00102518	0.00128147	0.00153777
244	Intact	T	11	92.0549	29.5365	29396.7	676.776	154.816	202.617	Lobate-shaped	5208	5298	90	5248.35	9.33183	44.3348	35.003	24.3639	1.90915	357.166	355.257	315.151	NW	0.000261355	0.000326693	0.000392032
245	Intact	T	10	92.0558	29.6369	18986.1	573.452	222.768	123.55	Tongue-shaped	5322	5409	87	5355.68	10.3477	36.3277	25.98	24.4719	280.491	339.677	59.1854	299.242	NW	0.000154667	0.000193333	0.000232
246	Intact	T	9	92.056	29.4839	48273.6	948.682	206.793	247.633	Lobate-shaped	5280	5360	80	5311.21	3.10741	42.7806	39.6732	20.856	18.4349	355.272	336.837	286.213	W	0.000473941	0.000592427	0.000710912
247	Intact	T	9	92.0564	29.6454	30632.3	653.484	191.488	206.952	Lobate-shaped	5255	5320	65	5285	5.58965	46.7804	41.1908	19.3006	9.78241	80.7274	70.945	49.8134	NE	0.000274593	0.000343241	0.000411889
248	Intact	T	9	92.0573	29.651	9357.73	406.652	160.146	86.1994	Tongue-shaped	5216	5286	70	5244.27	14.2233	38.9998	24.7765	29.0927	287.412	307.569	20.1567	295.103	NW	6.61724e-05	8.27155e-05	9.92586e-05
249	Intact	T	10	92.0575	29.6517	5532.69	285.459	105.489	68.4418	Tongue-shaped	5212	5251	39	5230.88	13.3849	31.1858	17.801	23.1467	262.405	272.121	9.71573	266.411	W	3.52205e-05	4.40257e-05	5.28308e-05
250	Intact	T	9	92.0576	29.6495	24447.9	581.873	182.982	149.206	Tongue-shaped	5235	5325	90	5275.79	12.9921	46.409	33.417	27.005	223.493	306.469	82.9767	271.491	W	0.00020949	0.000261862	0.000314234
251	Intact	T	9	92.0579	29.6475	9554.28	380.939	141.314	82.1699	Tongue-shaped	5254	5317	63	5283.08	17.9064	49.9618	32.0554	27.1138	249.102	286.991	37.8886	263.266	W	6.78438e-05	8.48047e-05	0.000101766
252	Intact	T	10	92.0584	29.656	100279	1586.4	135.293	629.929	Lobate-shaped	5132	5272	140	5178.18	9.57848	51.7123	42.1338	25.8178	4.76364	359.145	354.381	286.53	W	0.00113952	0.0014244	0.00170928
253	Intact	T	10	92.0636	29.6346	13438.5	444.617	147.109	108.316	Tongue-shaped	5299	5370	71	5327.53	14.6425	42.4325	27.79	28.729	0.424405	359.731	359.307	173.277	S	0.000102163	0.000127703	0.000153244
254	Intact	D	11	92.0638	29.5389	27707.5	725.681	105.505	289.273	Lobate-shaped	5282	5380	98	5328.85	15.334	43.4509	28.1169	32.0675	27.4744	69.2613	41.7869	45.056	NE	0.000243438	0.000304298	0.000365158
255	Intact	T	10	92.066	29.6559	24053.1	589.44	170.843	192.353	Lobate-shaped	5234	5337	103	5277.26	12.0313	52.6368	40.6055	30.7911	5.52754	350.611	345.083	70.3091	E	0.000205437	0.000256796	0.000308155
256	Intact	D	11	92.0665	29.6534	43757.5	791.517	262.193	185.659	Tongue-shaped	5291	5361	70	5312.21	1.73826	50.5819	48.8437	17.742	0	358.299	358.299	133.361	SE	0.000421246	0.000526558	0.000631869
257	Intact	D	12	92.0665	29.5359	25443	608.761	208.824	136.372	Tongue-shaped	5321	5392	71	5353.03	10.459	50.7408	40.2818	22.7513	0.674036	358.966	358.292	53.832	NE	0.000219763	0.000274703	0.000329644
258	Intact	T	9	92.0674	29.3534	5089.7	333.258	38.4403	146.155	Lobate-shaped	4961	4983	22	4969	18.1875	32.8544	14.6669	25.3099	340.145	353.254	13.1096	344.953	N	3.18642e-05	3.98303e-05	4.77963e-05
259	Intact	T	11	92.0675	29.6349	17359.4	567.524	102.246	231.677	Lobate-shaped	5258	5307	49	5279.2	13.4142	41.5486	28.1344	25.8586	16.631	86.6822	70.0513	42.1843	NE	0.000138904	0.00017363	0.000208356
260	Intact	T	12	92.0678	29.6553	34208.1	720.549	155.731	237.758	Lobate-shaped	5263	5312	49	5288.05	4.62959	29.3352	24.7056	15.4067	249.775	351.027	101.252	301.198	NW	0.000313492	0.000391865	0.000470238
261	Intact	T	9	92.0687	29.6282	10582.5	397.92	143.854	94.3858	Tongue-shaped	5217	5255	38	5234.5	9.40656	36.5277	27.1211	17.3408	3.53229	356.987	353.455	115.454	SE	7.6697e-05	9.58713e-05	0.000115046
262	Intact	T	9	92.0692	29.5376	42028.6	842.331	156.879	316.61	Lobate-shaped	5261	5369	108	5315.35	15.5329	56.1297	40.5968	27.3372	0.60309	358.727	358.124	209.784	SW	0.000401353	0.000501691	0.000602029
263	Intact	T	9	92.0694	29.3597	4144.01	295.95	40.6834	127.172	Lobate-shaped	4999	5009	10	5005.83	12.0123	31.3129	19.3007	19.7037	20.2249	47.1611	26.9362	32.8593	NE	2.48988e-05	3.11234e-05	3.73481e-05
264	Intact	D	11	92.0705	29.3682	9870.68	398.885	157.085	75.8216	Tongue-shaped	5065	5178	113	5108.86	12.7107	50.4087	37.698	35.4467	304.958	339.167	34.2086	323.605	NW	7.05487e-05	8.81858e-05	0.000105823
265	Intact	D	10	92.0708	29.6419	14947.5	471.981	148.446	103.439	Tongue-shaped	5235	5306	71	5265	15.7288	42.7493	27.0205	29.1377	325.033	358.229	33.1954	339.911	N	0.000116079	0.000145099	0.000174119
266	Intact	T	11	92.0709	29.3526	3703.09	240.83	93.9161	48.7085	Tongue-shaped	5026	5068	42	5043.4	24.4931	35.1842	10.6911	30.8122	312.709	322.892	10.1823	317.637	NW	2.17545e-05	2.71931e-05	3.26317e-05
267	Intact	D	11	92.0721	29.5375	34708.4	725.734	230.668	168.032	Tongue-shaped	5285	5440	155	5349.63	5.58965	50.4459	44.8562	30.0762	0.418209	357.153	356.735	235.581	SW	0.000319003	0.000398753	0.000478504
268	Relict	T	9	92.0722	29.5738	42918.2	894.141	359.218	168.532	Tongue-shaped	5003	5155	152	5059.45	6.92133	36.1054	29.1841	22.0114	261.87	311.222	49.3519	293.363	NW
269	Intact	T	9	92.0737	29.5304	28202.4	725.396	111.768	250.049	Lobate-shaped	5337	5410	73	5366.94	9.46218	34.5645	25.1024	26.8504	3.57633	358.103	354.527	104.802	E	0.000248666	0.000310832	0.000372999
270	Intact	T	10	92.0737	29.6452	11792.2	492.96	72.7619	214.88	Lobate-shaped	5177	5228	51	5203.43	18.1265	38.0633	19.9368	30.4572	289.841	328.046	38.2049	304.779	NW	8.73349e-05	0.000109169	0.000131002
271	Intact	T	11	92.074	29.3588	11506.7	424.537	93.9793	122.837	Lobate-shaped	5030	5096	66	5056.54	17.2277	46.3794	29.1517	34.711	274.764	317.946	43.1828	293.552	NW	8.48033e-05	0.000106004	0.000127205
272	Intact	T	9	92.0755	29.63	12325	497.07	84.9174	206.829	Lobate-shaped	5177	5230	53	5201.13	21.5673	36.0912	14.524	29.7156	286.189	323.31	37.1211	305.78	NW	9.20907e-05	0.000115113	0.000138136
273	Intact	T	9	92.0768	29.5386	8625.41	452.575	61.4946	198.438	Lobate-shaped	5340	5365	25	5352.67	17.0244	35.8483	18.8239	28.1167	256.675	283.878	27.2021	267.354	W	6.00078e-05	7.50098e-05	9.00118e-05
274	Intact	D	9	92.0772	29.6332	51849.1	1209.97	185.573	250.524	Lobate-shaped	5095	5171	76	5125.79	8.30211	33.489	25.1869	19.2942	255.7	348.389	92.6888	305.601	NW	0.000516372	0.000645465	0.000774558
275	Intact	T	12	92.0772	29.3884	6305.54	302.302	101.65	79.0001	Tongue-shaped	5211	5259	48	5230.67	24.9153	36.0676	11.1523	30.8028	8.1301	357.879	349.749	233.047	SW	4.1204e-05	5.1505e-05	6.1806e-05
276	Intact	D	11	92.078	29.4151	27236.4	618.269	153.289	193.325	Lobate-shaped	5133	5175	42	5159	5.29321	27.4553	22.1621	15.3972	2.3533	358.452	356.099	176.254	S	0.00023848	0.0002981	0.00035772
277	Intact	T	10	92.0789	29.6507	17938.7	688.004	81.3987	304.865	Lobate-shaped	5059	5137	78	5094.45	17.1966	47.1661	29.9695	34.2303	0.774219	359.703	358.929	278.943	W	0.000144484	0.000180605	0.000216726
278	Intact	T	9	92.0793	29.6379	10750.6	395.378	93.7251	131.301	Lobate-shaped	5076	5146	70	5106.31	23.8072	43.2903	19.4831	36.7891	270.585	323.791	53.2059	297.922	NW	7.81614e-05	9.77018e-05	0.000117242
279	Intact	D	10	92.0794	29.3907	8039.08	335.684	116.868	79.4288	Tongue-shaped	5140	5182	42	5157	18.0711	42.1967	24.1257	26.1283	17.9203	58.5232	40.6028	41.0992	NE	5.51467e-05	6.89334e-05	8.27201e-05
280	Intact	D	10	92.0804	29.3899	7387.7	335.887	119.343	74.0554	Tongue-shaped	5134	5201	67	5168.25	14.8115	42.4702	27.6587	34.3461	0	356.399	356.399	91.0837	E	4.98292e-05	6.22865e-05	7.47437e-05
281	Intact	D	10	92.0813	29.3895	11282.8	408.188	97.2891	125.274	Lobate-shaped	5162	5233	71	5196.69	25.6871	40.4399	14.7528	35.2776	4.29739	357.955	353.657	64.2526	NE	8.2827e-05	0.000103534	0.00012424
282	Intact	T	9	92.0814	29.3625	18903.2	518.172	183.917	102.264	Tongue-shaped	5067	5164	97	5116.76	17.48	43.9836	26.5035	28.9834	3.09406	353.541	350.447	70.1125	E	0.000153856	0.000192321	0.000230785
283	Intact	D	10	92.0823	29.3891	6697.82	314.314	88.7966	98.6671	Lobate-shaped	5195	5245	50	5224.57	27.0554	38.4136	11.3582	32.2262	0	359.519	359.519	248.617	W	4.42989e-05	5.53736e-05	6.64483e-05
284	Intact	T	9	92.0825	29.5273	33941.1	736.078	145.659	269.382	Lobate-shaped	5236	5290	54	5260.05	4.81983	30.6463	25.8264	21.1667	216.973	301.827	84.8547	253.093	W	0.000310558	0.000388198	0.000465837
285	Intact	D	10	92.083	29.6789	7216.01	343.992	118.902	90.0164	Tongue-shaped	5148	5167	19	5156.25	9.57848	21.8872	12.3087	14.6899	271.397	334.335	62.9376	300.38	NW	4.84428e-05	6.05535e-05	7.26642e-05
286	Intact	D	10	92.0837	29.3915	15681.3	457.095	125.359	138.591	Lobate-shaped	5127	5171	44	5152.06	14.7217	31.9379	17.2163	20.4129	287.85	356.009	68.1588	318.199	NW	0.00012295	0.000153688	0.000184426
287	Intact	T	9	92.0847	29.3644	24126.7	696.666	131.314	248.405	Lobate-shaped	4995	5028	33	5009.89	3.47333	40.4421	36.9688	19.9289	0	353.752	353.752	98.3398	E	0.000206191	0.000257739	0.000309287
288	Intact	T	11	92.0851	29.3754	7742.67	351.168	115.909	72.1599	Tongue-shaped	5042	5093	51	5061.5	13.5887	44.0401	30.4513	25.6956	281.634	344.982	63.348	321.093	NW	5.27159e-05	6.58949e-05	7.90738e-05
289	Intact	T	11	92.0857	29.5366	10381.7	393.384	146.092	86.6326	Tongue-shaped	5344	5458	114	5388.54	18.63	49.2844	30.6544	36.6121	286.887	307.694	20.8075	298.871	NW	7.49544e-05	9.3693e-05	0.000112432
290	Intact	T	11	92.0861	29.3759	11161.2	406.863	95.3434	141.114	Lobate-shaped	5059	5074	15	5063.5	2.94823	24.7065	21.7583	12.5638	0	354.806	354.806	298.368	NW	8.17569e-05	0.000102196	0.000122635
291	Intact	T	11	92.0874	29.3764	9834.34	399.798	126.114	118.509	Tongue-shaped	5061	5111	50	5080.7	6.46906	36.5341	30.0651	24.6876	302.775	336.615	33.8399	318.724	NW	7.02371e-05	8.77964e-05	0.000105356
292	Intact	T	11	92.0891	29.4374	43548.8	816.468	170.521	312.169	Lobate-shaped	5145	5247	102	5191.31	2.45752	39.7295	37.2719	30.1035	12.4881	180	167.512	31.185	NE	0.000418836	0.000523545	0.000628254
293	Intact	D	12	92.0891	29.3638	54555.9	985.853	329.829	276.736	Tongue-shaped	5033	5162	129	5073.86	3.92828	38.7603	34.832	18.9463	0	356.987	356.987	304.363	NW	0.000548886	0.000686107	0.000823329
294	Intact	T	11	92.0893	29.377	9211.26	384.339	114.96	118.637	Lobate-shaped	3862	5593	1731	4763.55	0.347755	55.5451	55.1973	24.117	0	359.326	359.326	177.072	S	6.49314e-05	8.11643e-05	9.73972e-05
295	Intact	T	11	92.09	29.4726	35596.3	693.639	187.84	219.458	Lobate-shaped	5219	5304	85	5253.27	5.89107	43.195	37.3039	23.8593	283.736	347.939	64.2024	331.427	NW	0.00032882	0.000411026	0.000493231
296	Intact	T	8	92.0909	29.4279	36804.8	814.591	129.894	320.556	Lobate-shaped	5127	5186	59	5156.45	8.65532	36.0609	27.4056	20.8138	0	356.711	356.711	252.44	W	0.000342262	0.000427827	0.000513393
297	Intact	T	10	92.0911	29.4448	25280.7	616.111	122.801	225.89	Lobate-shaped	5199	5265	66	5231.07	5.24783	38.2427	32.9949	22.36	299.358	347.196	47.838	331.042	NW	0.000218082	0.000272602	0.000327123
298	Intact	T	9	92.0914	29.3771	11750.4	414.271	107.631	120.294	Lobate-shaped	5132	5170	38	5153.38	7.46458	39.948	32.4834	30.9608	301.608	352.266	50.6589	338.555	N	8.69632e-05	0.000108704	0.000130445
299	Intact	T	10	92.092	29.436	34758.3	807.346	119.585	310.398	Lobate-shaped	5159	5238	79	5198.44	7.61348	47.2576	39.6442	27.4649	0	359.721	359.721	123.498	SE	0.000319552	0.00039944	0.000479329
300	Intact	T	8	92.0929	29.377	3978.53	254.794	92.4674	52.1568	Tongue-shaped	5173	5195	22	5183	31.5605	40.5407	8.9802	34.5635	319.529	328.543	9.01437	325.016	NW	2.37104e-05	2.96381e-05	3.55657e-05
301	Intact	T	11	92.0933	29.5412	14100.1	453.666	136.056	122.851	Tongue-shaped	5223	5295	72	5252.82	12.1115	41.1217	29.0103	25.8477	1.09469	359.157	358.063	52.5167	NE	0.000108228	0.000135285	0.000162342
302	Intact	T	11	92.0935	29.3776	14710.4	526.692	115.88	133.25	Lobate-shaped	5164	5206	42	5185.8	17.336	28.4604	11.1245	21.2241	271.494	301.464	29.9698	289.644	W	0.000113873	0.000142342	0.00017081
303	Intact	T	10	92.0939	29.5991	43444.7	1061.74	136.466	385.425	Lobate-shaped	5223	5283	60	5256.06	4.5248	29.7022	25.1774	16.5467	229.399	322.943	93.5448	283.052	W	0.000417635	0.000522044	0.000626452
304	Intact	T	12	92.0943	29.4268	25200.6	613.747	159.16	175.38	Lobate-shaped	5162	5243	81	5196.13	8.09399	41.0143	32.9204	24.9349	0	51.7662	51.7662	24.5751	NE	0.000217253	0.000271566	0.00032588
305	Intact	T	12	92.0957	29.4262	26062.5	645.981	173.502	163.408	Tongue-shaped	5183	5292	109	5215.19	4.81983	47.2756	42.4558	25.8503	5.01311	350.311	345.298	39.6786	NE	0.0002262	0.00028275	0.0003393
306	Intact	T	9	92.0961	29.5265	26808.6	784.753	141.49	242.769	Lobate-shaped	5243	5283	40	5258.47	4.16576	32.7561	28.5903	18.2267	218.66	327.68	109.021	277.567	W	0.000233993	0.000292491	0.000350989
307	Intact	T	9	92.0967	29.5303	13131.6	539.313	76.2417	238.14	Lobate-shaped	5246	5325	79	5290.5	26.1924	39.9243	13.7319	32.7435	262.185	299.249	37.0641	276.629	W	9.93699e-05	0.000124212	0.000149055
308	Intact	T	9	92.0968	29.4733	27065.2	736.047	112.785	293.869	Lobate-shaped	5316	5358	42	5334.31	15.1319	39.3431	24.2112	23.0686	321.809	359.091	37.2816	342.63	N	0.000236682	0.000295853	0.000355023
309	Intact	T	13	92.0979	29.4262	68423.8	1009.63	255.921	305.4	Lobate-shaped	5211	5303	92	5253.33	8.81635	39.3685	30.5522	22.1847	5.19443	347.005	341.811	288.463	W	0.000720313	0.000900391	0.00108047
310	Intact	T	10	92.0979	29.3659	9303.46	386.803	87.1932	120.049	Lobate-shaped	5112	5164	52	5134.55	19.2652	40.4033	21.1381	30.7097	316.157	338.091	21.934	327.415	NW	6.57122e-05	8.21403e-05	9.85683e-05
311	Intact	T	10	92.0991	29.3661	6479.53	320.403	125.061	67.4755	Tongue-shaped	5150	5210	60	5173.86	20.9163	40.7664	19.8501	32.7165	325.061	344.445	19.3847	333.96	NW	4.25721e-05	5.32151e-05	6.38581e-05
312	Intact	T	11	92.0995	29.428	10085.4	421.453	144.598	67.4985	Tongue-shaped	5254	5294	40	5276.5	13.7282	27.4825	13.7543	19.0916	231.71	306.87	75.1601	259.083	W	7.23945e-05	9.04932e-05	0.000108592
313	Intact	T	10	92.0999	29.3685	33361.4	1037.22	104.565	439.55	Lobate-shaped	5106	5170	64	5136.22	6.65914	36.7443	30.0851	18.7	143.973	327.265	183.292	271.921	W	0.000304204	0.000380255	0.000456306
314	Intact	T	10	92.1014	29.534	12356.5	451.216	163.522	76.858	Tongue-shaped	5237	5337	100	5287.5	20.2337	46.0304	25.7967	35.4579	27.7585	356.379	328.62	290.505	W	9.23736e-05	0.000115467	0.00013856
315	Intact	T	10	92.1015	29.4309	5517.45	298.253	76.0504	78.2895	Lobate-shaped	5219	5241	22	5226.8	1.96645	47.2469	45.2804	20.006	0	54.0395	54.0395	27.4798	NE	3.51042e-05	4.38802e-05	5.26563e-05
316	Intact	T	10	92.1015	29.3713	14755.7	497.419	129.446	121.443	Tongue-shaped	5159	5209	50	5181.71	15.5329	33.838	18.3052	25.1294	245.171	287.21	42.0389	269.326	W	0.000114295	0.000142868	0.000171442
317	Intact	T	11	92.1026	29.3781	16317.3	564.478	134.656	122.324	Tongue-shaped	5133	5237	104	5160.47	10.8491	41.5519	30.7028	26.621	7.85331	353.047	345.194	315.936	NW	0.000128959	0.000161199	0.000193439
318	Intact	T	11	92.1027	29.4207	13889.5	553.22	60.4651	237.866	Lobate-shaped	5261	5287	26	5273.87	22.6293	30.6476	8.01832	25.9237	1.06091	357.049	355.988	40.1095	NE	0.000106291	0.000132863	0.000159436
319	Intact	T	9	92.1029	29.5229	13749.6	595.49	57.6482	254.111	Lobate-shaped	5267	5294	27	5280.33	20.8293	40.6925	19.8632	29.9211	260.803	283.449	22.6453	273.481	W	0.000105008	0.00013126	0.000157512
320	Intact	T	11	92.1035	29.4298	14897	509.045	103.085	162.399	Lobate-shaped	5208	5270	62	5237.06	11.3211	38.1333	26.8122	27.735	3.27049	59.0362	55.7658	29.0429	NE	0.000115609	0.000144511	0.000173414
321	Intact	T	11	92.1037	29.3788	28039.7	706.496	248.65	135.205	Tongue-shaped	5129	5250	121	5163.23	3.88212	42.6126	38.7305	24.6133	12.0948	358.531	346.436	276.337	W	0.000246946	0.000308682	0.000370418
322	Intact	T	10	92.104	29.5892	27834.7	638.095	220.234	135.665	Tongue-shaped	5278	5367	89	5309.5	12.6973	42.6473	29.95	28.4912	281.31	327.926	46.6161	300.449	NW	0.00024478	0.000305975	0.00036717
323	Intact	T	10	92.1066	29.5941	48384.5	881.393	280.613	213.411	Tongue-shaped	5206	5344	138	5248.21	7.89502	47.3944	39.4994	23.4945	0	359.61	359.61	213.917	SW	0.000475248	0.000594059	0.000712871
324	Intact	T	11	92.1067	29.5366	37629.9	914.552	125.035	362.445	Lobate-shaped	5154	5228	74	5190.14	8.52554	41.4341	32.9085	20.4298	0	357.797	357.797	132.878	SE	0.000351489	0.000439362	0.000527234
325	Intact	T	9	92.1074	29.4479	35017.7	955.612	126.332	343.388	Lobate-shaped	5112	5154	42	5136.37	1.25366	26.8592	25.6056	17.3875	249.624	348.69	99.0665	289.565	W	0.000322416	0.000403021	0.000483625
326	Intact	T	11	92.109	29.529	24346.4	671.799	114.523	262.629	Lobate-shaped	5253	5297	44	5273.93	2.11438	33.9182	31.8038	20.655	305.538	357.184	51.6468	341.118	N	0.000208447	0.000260558	0.00031267
327	Intact	T	11	92.111	29.4229	22045.3	630.547	93.2378	244.906	Lobate-shaped	5160	5205	45	5177.52	3.57575	40.1912	36.6154	19.714	16.0736	353.66	337.586	305.919	NW	0.000185034	0.000231293	0.000277552
328	Intact	T	9	92.1114	29.4847	14571.6	542.102	70.115	214.576	Lobate-shaped	5267	5308	41	5278.06	11.1422	35.7666	24.6244	24.909	10.008	349.624	339.616	202.181	S	0.000112585	0.000140731	0.000168877
329	Intact	T	9	92.1117	29.5809	31023.6	714.415	155.087	227.724	Lobate-shaped	5244	5295	51	5269.6	6.6144	31.1858	24.5714	18.7349	0	359.31	359.31	109.783	E	0.000278807	0.000348509	0.00041821
330	Intact	T	11	92.1125	29.4402	36925.7	828.11	168.563	238.242	Lobate-shaped	5243	5332	89	5283.83	7.767	40.8288	33.0618	26.4073	8.87055	77.4712	68.6006	32.8279	NE	0.00034361	0.000429513	0.000515416
331	Relict	T	12	92.1132	29.5323	9744.85	406.143	89.4756	130.602	Lobate-shaped	5187	5214	27	5198.09	14.3362	29.1226	14.7864	20.1101	312.274	341.162	28.8879	324.456	NW
332	Intact	T	11	92.1145	29.4287	54767	1250.19	144.442	557.8	Lobate-shaped	5082	5150	68	5108.64	2.86531	29.6337	26.7684	15.3206	2.56377	358.603	356.039	195.637	S	0.000551436	0.000689296	0.000827155
333	Intact	T	9	92.1146	29.4873	29809.4	1065.87	84.181	435.082	Lobate-shaped	5219	5291	72	5246.63	9.18043	34.2043	25.0238	24.6421	10.7131	358.452	347.739	305.77	NW	0.000265764	0.000332206	0.000398647
334	Intact	T	9	92.1152	29.44	5137.87	268.08	86.4421	68.5681	Tongue-shaped	5231	5273	42	5250.83	25.283	37.2332	11.9502	31.713	0.784824	19.0935	18.3087	8.6183	N	3.22264e-05	4.0283e-05	4.83396e-05
335	Intact	T	10	92.1156	29.5796	66390.1	1153.76	446.64	187.38	Tongue-shaped	5223	5400	177	5299.99	12.344	50.5728	38.2288	24.3196	3.65222	359.421	355.769	42.0325	NE	0.000694698	0.000868373	0.00104205
336	Intact	T	10	92.1176	29.4167	62672.9	1401.61	154.29	569.524	Lobate-shaped	5028	5134	106	5082.61	9.46218	43.1537	33.6916	22.4434	4.02826	357.166	353.138	291.318	W	0.000648288	0.000810361	0.000972433
337	Intact	T	9	92.1188	29.4902	27825.4	799.141	98.4308	239.155	Lobate-shaped	5183	5245	62	5212.59	12.1958	31.1871	18.9913	20.882	0	357.337	357.337	223.563	SW	0.000244682	0.000305853	0.000367024
338	Intact	T	9	92.1196	29.4402	30470.5	810.685	141.907	305.394	Lobate-shaped	5162	5242	80	5196.33	8.30211	38.932	30.6299	25.2275	3.44739	45	41.5526	17.425	N	0.000272853	0.000341066	0.000409279
339	Intact	T	9	92.1203	29.5784	9507.23	372.824	89.1912	139.095	Lobate-shaped	5293	5321	28	5305.82	16.2195	35.3017	19.0823	23.1278	298.56	338.356	39.7959	311.438	NW	6.74431e-05	8.43038e-05	0.000101165
340	Intact	T	10	92.1204	29.6546	21234.1	589.026	223.515	111.26	Tongue-shaped	5260	5357	97	5297.12	8.29503	42.2484	33.9534	27.6186	16.294	63.9111	47.617	37.2212	NE	0.000176894	0.000221118	0.000265342
341	Intact	T	10	92.1219	29.499	208196	3387.61	203.861	1160.7	Lobate-shaped	5074	5250	176	5141.48	2.43285	47.8537	45.4208	26.7274	244.983	355.292	110.309	288.381	W	0.00273804	0.00342255	0.00410706
342	Relict	T	12	92.1233	29.4249	54176.2	1178.4	154.982	479.678	Lobate-shaped	4947	5021	74	4982.49	1.09958	39.9235	38.824	23.6044	39.2894	336.448	297.158	299.705	NW
343	Intact	T	9	92.1234	29.5644	9853.02	425.076	134.845	82.7711	Tongue-shaped	5231	5297	66	5260.33	8.15196	39.101	30.9491	27.0791	19.1632	87.1844	68.0212	41.8134	NE	7.03973e-05	8.79966e-05	0.000105596
344	Intact	T	8	92.1241	29.5616	7791.48	551.094	32.7733	184.613	Lobate-shaped	5306	5348	42	5322	6.24448	27.1925	20.948	16.4845	1.04163	333.435	332.393	165.138	S	5.31149e-05	6.63936e-05	7.96724e-05
345	Relict	T	9	92.1243	29.6586	85796.3	1090.82	344.21	320.489	Tongue-shaped	5108	5279	171	5162.03	2.19835	48.9029	46.7045	24.8322	0	356.855	356.855	281.811	W
346	Intact	T	9	92.1255	29.4554	15148.1	473.945	169.188	117.695	Tongue-shaped	5194	5282	88	5236.39	20.1376	38.2005	18.0629	30.9447	315	354.352	39.3517	333.27	NW	0.000117952	0.000147439	0.000176927
347	Intact	T	9	92.1266	29.4567	11433.8	446.961	134.03	92.3088	Tongue-shaped	5176	5243	67	5206	18.1498	38.3809	20.2311	31.2161	280.539	329.184	48.6451	306.422	NW	8.41588e-05	0.000105199	0.000126238
348	Intact	T	10	92.1271	29.5715	36082.1	1051.85	94.4455	451.392	Lobate-shaped	5231	5284	53	5258.45	2.64657	22.5058	19.8593	10.6197	0	326.31	326.31	56.475	NE	0.000334212	0.000417765	0.000501318
349	Intact	T	9	92.1295	29.38	13647.7	520.282	188.503	101.568	Tongue-shaped	5199	5317	118	5248.53	12.7107	43.0364	30.3258	32.0988	13.9457	68.8059	54.8602	39.0179	NE	0.000104075	0.000130094	0.000156112
350	Intact	T	9	92.1318	29.3624	42428.5	877.183	211.299	242.807	Lobate-shaped	5023	5124	101	5060.84	9.55412	42.2688	32.7146	24.8468	2.48955	353.853	351.364	300.98	NW	0.000405939	0.000507424	0.000608909
351	Intact	T	10	92.1326	29.3417	27665.8	806.832	101.713	309.59	Lobate-shaped	5050	5115	65	5080.03	15.3662	39.4689	24.1028	27.6132	0	355.601	355.601	55.4051	NE	0.000242999	0.000303749	0.000364499
352	Intact	T	9	92.1328	29.462	9455.67	431.281	74.9155	156.02	Lobate-shaped	5196	5257	61	5222.83	21.6846	32.0315	10.347	26.6161	10.5915	354.71	344.118	283.322	W	6.70044e-05	8.37555e-05	0.000100507
353	Intact	T	9	92.1332	29.4545	21075.5	618.535	115.972	246.269	Lobate-shaped	5156	5201	45	5175.71	5.2819	37.2675	31.9856	21.6126	0.658542	359.193	358.535	184.541	S	0.00017531	0.000219137	0.000262965
354	Intact	T	11	92.1343	29.5822	43305.2	858.733	214.95	255.934	Lobate-shaped	5228	5293	65	5264.45	6.998	28.504	21.506	17.3652	2.56377	353.853	351.29	49.3147	NE	0.000416026	0.000520032	0.000624038
355	Intact	T	10	92.1346	29.341	20217.9	713.364	82.4022	296.555	Lobate-shaped	5058	5124	66	5099.23	19.1815	39.9857	20.8042	28.5577	4.27946	347.989	343.709	308.367	NW	0.000166784	0.00020848	0.000250176
356	Intact	T	9	92.1347	29.3794	34340	741.115	166.094	294.154	Lobate-shaped	5120	5178	58	5148.56	6.68584	32.67	25.9842	19.0489	2.83411	359.326	356.492	85.5149	E	0.000314943	0.000393679	0.000472415
357	Intact	T	9	92.1348	29.3647	4075.88	289.537	105.908	59.2607	Tongue-shaped	4987	5024	37	5001.75	22.7838	36.4511	13.6673	29.0967	1.99788	10.8641	8.86618	6.5057	N	2.44084e-05	3.05105e-05	3.66125e-05
358	Intact	T	9	92.135	29.468	48154.7	1370.66	98.1265	602.561	Lobate-shaped	5067	5164	97	5120.23	9.5297	37.6528	28.1231	23.5529	280.098	341.232	61.1344	312.841	NW	0.00047254	0.000590675	0.00070881
359	Intact	T	9	92.1357	29.3645	4628.01	272.917	86.8378	52.9904	Tongue-shaped	5002	5046	44	5018.25	29.0299	37.3848	8.35492	34.0696	1.28733	356.009	354.722	90.1941	E	2.84279e-05	3.55349e-05	4.26419e-05
360	Intact	T	9	92.1365	29.4721	12732.5	469.571	75.318	179.836	Lobate-shaped	5065	5094	29	5080	21.6226	32.0315	10.409	26.9599	259.854	303.518	43.6635	282.227	W	9.57565e-05	0.000119696	0.000143635
361	Intact	T	9	92.1368	29.4751	15095.4	696.582	102.821	316.789	Lobate-shaped	5001	5037	36	5018.62	11.4069	31.563	20.1561	23.2814	267.997	342.824	74.8266	296.454	NW	0.000117459	0.000146824	0.000176188
362	Intact	T	10	92.1378	29.495	13105.7	644.831	61.9158	262.207	Lobate-shaped	5116	5147	31	5133.27	16.77	35.7743	19.0043	25.6041	278.427	323.017	44.5901	299.761	NW	9.91342e-05	0.000123918	0.000148701
363	Relict	T	10	92.1381	29.3631	35241.5	860.625	157.787	332.837	Lobate-shaped	5037	5188	151	5109.4	8.99385	37.3455	28.3516	25.9717	276.189	345.964	69.7751	300.177	NW
364	Intact	T	11	92.1383	29.6127	33946.5	962.222	89.4526	363.973	Lobate-shaped	5155	5216	61	5181.21	13.5018	37.3848	23.883	27.8169	256.504	299.745	43.2406	272.779	W	0.000310618	0.000388273	0.000465927
365	Intact	T	10	92.1385	29.538	46485.7	1239.46	225.063	422.426	Lobate-shaped	5151	5256	105	5203.31	6.6144	46.2578	39.6434	25.0712	218.991	339.146	120.155	293.373	NW	0.000452955	0.000566194	0.000679433
366	Intact	T	12	92.1389	29.3822	41510.5	1601.81	74.1945	730.876	Lobate-shaped	5053	5160	107	5109.52	13.1431	37.2798	24.1367	23.8412	278.344	338.097	59.7529	315.992	NW	0.000395423	0.000494279	0.000593135
367	Intact	T	11	92.1398	29.5855	111392	1451.51	331.589	500.226	Lobate-shaped	5170	5249	79	5205.79	2.77989	27.8379	25.058	13.432	0	358.315	358.315	96.4302	E	0.0012927	0.00161587	0.00193904
368	Intact	T	10	92.1405	29.3455	3574.2	230.688	51.3915	66.9126	Lobate-shaped	5077	5098	21	5085.2	25.3631	28.8486	3.48545	27.5665	325.539	335.158	9.61844	329.843	NW	2.08491e-05	2.60614e-05	3.12737e-05
369	Intact	T	10	92.1409	29.6284	4171.49	256.986	56.1806	69.0685	Lobate-shaped	5288	5316	28	5304.2	26.2905	30.9325	4.64196	28.6005	34.3803	45.6228	11.2424	39.7492	NE	2.5097e-05	3.13713e-05	3.76456e-05
370	Intact	T	10	92.1413	29.6279	2765	207.633	50.3065	61.9791	Lobate-shaped	5303	5334	31	5317.67	23.0527	27.5986	4.54589	25.8319	39.4945	60.4885	20.994	49.4178	NE	1.53217e-05	1.91521e-05	2.29825e-05
371	Intact	T	10	92.1413	29.346	4650.47	278.093	49.074	90.6566	Lobate-shaped	5066	5098	32	5081.57	26.3317	36.4835	10.1517	31.2297	332.292	347.939	15.6462	338.642	N	2.85936e-05	3.5742e-05	4.28904e-05
372	Intact	T	9	92.1415	29.6149	4645.36	286.733	43.5547	113.52	Lobate-shaped	5252	5277	25	5261	24.2826	42.7141	18.4315	28.7589	1.86478	357.274	355.409	144.052	SE	2.85559e-05	3.56949e-05	4.28339e-05
373	Intact	T	10	92.142	29.6267	13092.4	487.279	152.884	105.167	Tongue-shaped	5313	5398	85	5346	11.1422	43.6468	32.5047	29.8292	10.3048	349.902	339.598	80.3761	E	9.90136e-05	0.000123767	0.00014852
374	Intact	T	11	92.1424	29.6354	36807.9	944.238	186.493	163.025	Tongue-shaped	5240	5327	87	5274.04	8.52554	40.4055	31.8799	23.486	244.047	320.492	76.4457	294.779	NW	0.000342296	0.00042787	0.000513444
375	Intact	T	11	92.1427	29.6325	6426.17	332.477	53.5293	119.921	Lobate-shaped	5268	5295	27	5280.75	13.3849	30.0393	16.6545	22.1641	241.955	272.07	30.1147	255.263	W	4.21517e-05	5.26896e-05	6.32275e-05
376	Intact	T	10	92.1428	29.3469	8183.76	366.466	77.161	132.277	Lobate-shaped	5034	5081	47	5052.33	17.986	38.3522	20.3662	29.9425	24.1932	358.746	334.552	308.986	NW	5.63399e-05	7.04249e-05	8.45099e-05
377	Intact	T	11	92.1429	29.6306	8546.9	373.465	113.57	82.9018	Tongue-shaped	5292	5341	49	5315.56	20.0103	36.5056	16.4953	27.6762	271.469	295.931	24.462	282.505	W	5.93531e-05	7.41913e-05	8.90296e-05
378	Intact	T	11	92.1431	29.6315	6738.57	346.142	80.1281	106.864	Lobate-shaped	5274	5309	35	5292.38	13.6546	28.9701	15.3156	21.6678	287.802	302.005	14.2035	296.765	NW	4.46225e-05	5.57781e-05	6.69338e-05
379	Relict	T	10	92.1434	29.6611	25811.8	688.728	163.142	221.745	Lobate-shaped	5119	5222	103	5177	15.6137	42.1667	26.553	34.4089	5.25781	356.348	351.09	37.3567	NE
380	Intact	T	11	92.1434	29.627	13711.7	468.896	120.846	154.661	Lobate-shaped	5328	5390	62	5353.56	13.1944	43.4884	30.294	30.9163	263.407	293.749	30.3423	273.911	W	0.00010466	0.000130825	0.00015699
381	Intact	T	11	92.1437	29.6259	6707.88	332.562	117.63	79.0495	Tongue-shaped	5358	5417	59	5381	22.5493	44.9626	22.4133	31.9365	265.888	299.745	33.8571	279.889	W	4.43787e-05	5.54734e-05	6.6568e-05
382	Intact	T	11	92.1453	29.6149	17508.8	574.418	175.473	119.187	Tongue-shaped	5302	5443	141	5362.24	22.6637	54.032	31.3683	37.955	255.861	310.486	54.6251	282.026	W	0.00014034	0.000175425	0.00021051
383	Intact	T	10	92.1457	29.577	33707.6	816.492	283.196	113.177	Tongue-shaped	5175	5277	102	5223.02	10.7905	46.2036	35.4131	22.9277	6.76617	80.4171	73.6509	44.9905	NE	0.000307997	0.000384996	0.000461996
384	Intact	T	11	92.1475	29.6584	16531.6	584.797	86.5755	214.957	Lobate-shaped	5173	5219	46	5191.1	8.52554	29.6575	21.1319	18.3386	235.886	324.09	88.2047	276.176	W	0.000130994	0.000163742	0.000196491
385	Intact	T	11	92.1479	29.6344	8423.57	413.924	52.396	140.713	Lobate-shaped	5291	5338	47	5314.44	31.7034	45.8656	14.1622	38.6646	272.175	292.467	20.292	279.594	W	5.83268e-05	7.29085e-05	8.74902e-05
386	Intact	T	11	92.1481	29.6332	15150.4	612.177	230.761	119.77	Tongue-shaped	5306	5415	109	5360.31	19.8301	43.7668	23.9368	31.7567	257.881	279.968	22.0871	268.879	W	0.000117973	0.000147466	0.000176959
387	Intact	T	10	92.1482	29.6218	11050	427.17	167.176	90.7832	Tongue-shaped	5323	5383	60	5351.92	10.9179	42.4803	31.5624	25.6895	13.6097	38.6598	25.0501	25.6629	NE	8.07806e-05	0.000100976	0.000121171
388	Intact	T	12	92.1484	29.6547	119357	1762.58	243.325	721.726	Lobate-shaped	5183	5322	139	5245.46	1.43355	35.0768	33.6433	18.0252	1.63658	359.236	357.6	91.7623	E	0.0014044	0.0017555	0.0021066
389	Intact	T	11	92.15	29.6487	81201.8	1088.34	379.654	247.881	Tongue-shaped	5267	5341	74	5311.5	0.347755	42.0426	41.6949	14.2709	1.33222	357.374	356.041	137.426	SE	0.000884608	0.00110576	0.00132691
390	Intact	T	11	92.1516	29.652	44192.8	856.578	220.074	256.396	Lobate-shaped	5246	5300	54	5270.16	0.347755	26.2905	25.9428	14.5933	21.8014	334.134	312.332	276.926	W	0.00042628	0.00053285	0.00063942
391	Intact	T	11	92.152	29.6503	6395.2	307.019	62.8281	116.095	Lobate-shaped	5278	5300	22	5285.75	13.9783	24.8103	10.832	18.8271	305.34	321.203	15.8633	313.886	NW	4.1908e-05	5.23851e-05	6.28621e-05
392	Intact	T	12	92.1547	29.6443	53107.2	1053.53	379.165	112.158	Tongue-shaped	5247	5372	125	5309.63	0.777566	49.982	49.2044	18.479	14.3493	161.565	147.216	69.7462	E	0.000531443	0.000664304	0.000797164
393	Intact	T	9	92.1547	29.6368	18939.5	769.65	112.024	280.642	Lobate-shaped	5292	5385	93	5316	8.99385	34.3807	25.3868	23.7509	30.9638	356.73	325.766	87.0693	E	0.000154211	0.000192764	0.000231317
394	Intact	T	11	92.155	29.5445	19584.6	587.157	204.133	125.724	Tongue-shaped	5089	5141	52	5113.92	12.0313	38.7018	26.6706	22.222	315	346.535	31.5348	329.022	NW	0.000160535	0.000200669	0.000240803
395	Intact	T	12	92.1556	29.6552	22102.8	818.993	327.728	84.9372	Tongue-shaped	5320	5418	98	5356.38	12.5898	37.8471	25.2573	23.2821	0.830315	358.052	357.222	151.924	SE	0.000185613	0.000232016	0.00027842
396	Intact	T	11	92.1559	29.6628	21526.8	715.717	87.3978	269.138	Lobate-shaped	5166	5220	54	5192.52	13.5226	34.9404	21.4178	23.5691	41.9471	109.323	67.3761	77.4093	E	0.000179824	0.00022478	0.000269736
397	Intact	T	11	92.1561	29.6609	32511.6	816.717	125.518	253.263	Lobate-shaped	5190	5273	83	5224.69	5.05034	35.1732	30.1228	17.9446	13.3925	94.514	81.1215	55.894	NE	0.00029493	0.000368663	0.000442395
398	Intact	T	11	92.1563	29.5338	2231.39	179.619	52.5333	53.1873	Lobate-shaped	5163	5185	22	5175.67	30.917	36.7615	5.84454	33.604	331.521	337.989	6.4678	334.07	NW	1.18458e-05	1.48072e-05	1.77686e-05
399	Intact	T	11	92.1564	29.6584	11130.7	444.887	78.623	160.356	Lobate-shaped	5234	5275	41	5254.38	15.2045	28.6698	13.4653	23.1854	36.3268	78.0558	41.729	56.4688	NE	8.14895e-05	0.000101862	0.000122234
400	Intact	T	11	92.1565	29.6435	15984.5	538.856	146.175	118.487	Tongue-shaped	5263	5314	51	5284.12	11.5318	40.6642	29.1324	22.8426	6.54629	357.709	351.163	299.58	NW	0.000125809	0.000157261	0.000188713
401	Intact	T	11	92.1568	29.6566	17253.3	526.311	155.146	124.146	Tongue-shaped	5278	5387	109	5315.05	2.02692	44.5062	42.4793	24.8415	7.12502	348.465	341.34	243.771	SW	0.000137886	0.000172357	0.000206828
402	Relict	T	10	92.1568	29.663	4519.73	291.15	67.8556	69.4491	Lobate-shaped	5176	5193	17	5185.17	8.35856	17.6437	9.28514	12.9276	242.103	276.71	34.6071	262.259	W
403	Intact	T	9	92.1569	29.6647	10849.5	484.823	63.1612	198.267	Lobate-shaped	5174	5205	31	5184.92	12.7285	26.0484	13.3199	20.8032	249.974	300.256	50.2825	270.168	W	7.90246e-05	9.87808e-05	0.000118537
404	Intact	T	9	92.1573	29.6708	11397.6	482.547	122.631	136.946	Lobate-shaped	5123	5166	43	5141.4	10.3197	42.379	32.0593	24.4015	256.218	290.273	34.0543	270.597	W	8.38396e-05	0.000104799	0.000125759
405	Intact	T	11	92.158	29.6132	28699.1	654.29	180.799	208.088	Lobate-shaped	5249	5293	44	5275.11	8.52554	27.2558	18.7302	15.6709	0	358.603	358.603	54.2773	NE	0.000253931	0.000317413	0.000380896
406	Intact	T	10	92.1582	29.5348	35044.4	887.953	113.697	318.662	Lobate-shaped	5110	5185	75	5142.71	18.0886	41.2753	23.1867	30.0593	1.18119	357.797	356.616	257.086	W	0.000322712	0.00040339	0.000484068
407	Intact	T	10	92.1619	29.6445	92622.1	1410.99	239.489	524.131	Lobate-shaped	5171	5291	120	5229.05	2.71406	43.1831	40.469	19.5705	0.93919	359.119	358.179	89.738	E	0.00103593	0.00129491	0.00155389
408	Intact	T	9	92.1623	29.6712	12614.8	543.353	101.754	172.624	Lobate-shaped	5163	5236	73	5202.8	19.1788	35.6377	16.4589	27.3289	286.699	344.249	57.5496	306.702	NW	9.46958e-05	0.00011837	0.000142044
409	Intact	T	9	92.1625	29.6689	77742.6	1164.72	412.424	189.668	Tongue-shaped	5229	5335	106	5273.73	2.98883	41.2692	38.2804	17.1342	1.93059	354.523	352.592	173.047	S	0.000839582	0.00104948	0.00125937
410	Intact	T	9	92.1634	29.6234	73512.6	1671.01	126.506	675.448	Lobate-shaped	5137	5247	110	5187.42	6.50571	37.7528	31.2471	19.6357	213.232	306.741	93.5089	266.177	W	0.000785067	0.000981334	0.0011776
411	Intact	T	13	92.1639	29.6272	101916	1520.7	541.341	371.083	Tongue-shaped	5115	5397	282	5189.06	6.16775	49.1113	42.9435	24.2658	223.264	334.983	111.719	289.138	W	0.00116188	0.00145235	0.00174282
412	Intact	T	12	92.1658	29.6296	82545	1455.65	565.302	188.214	Tongue-shaped	5129	5389	260	5234.32	7.12387	43.799	36.6751	24.3054	239.036	336.949	97.9125	289.138	W	0.000902198	0.00112775	0.0013533
413	Intact	T	11	92.1662	29.6164	21220.2	637.565	106.733	190.993	Lobate-shaped	5243	5280	37	5259.76	7.58239	33.1697	25.5873	20.3154	1.84761	63.0939	61.2463	27.6471	NE	0.000176755	0.000220944	0.000265133
414	Relict	T	9	92.1667	29.5858	43670.5	1161.46	129.8	518.079	Lobate-shaped	5021	5070	49	5048.88	13.7485	31.077	17.3285	20.777	253.926	305.87	51.9434	276.907	W
415	Relict	T	9	92.1678	29.5958	48871.4	1130.23	140.834	502.542	Lobate-shaped	4995	5043	48	5013.89	7.22293	38.6375	31.4146	17.478	228.731	328.57	99.839	290.308	W
416	Intact	T	10	92.1687	29.6388	60598.8	1555.08	143.585	647.161	Lobate-shaped	5064	5119	55	5093.75	4.86928	28.9716	24.1023	13.8894	251.565	350.838	99.2726	306.114	NW	0.000622628	0.000778286	0.000933943
417	Intact	T	9	92.1733	29.6598	17377.8	631.996	84.5118	262.292	Lobate-shaped	5194	5245	51	5216.86	8.62817	30.7409	22.1128	17.6799	4.14462	359.145	355	272.846	W	0.00013908	0.00017385	0.00020862
418	Intact	T	9	92.174	29.6166	12867.8	484.255	85.4039	187.574	Lobate-shaped	5222	5255	33	5236	10.1898	15.048	4.8582	12.2772	16.5044	342.979	326.475	75.4836	E	9.69787e-05	0.000121223	0.000145468
419	Intact	T	9	92.175	29.6617	8502.46	397.676	70.1169	144.941	Lobate-shaped	5161	5200	39	5186.89	16.0951	37.6297	21.5345	24.9912	315.902	343.686	27.7839	327.381	NW	5.89829e-05	7.37286e-05	8.84743e-05
420	Intact	T	9	92.1761	29.6628	5249.25	297.085	100.954	79.4556	Tongue-shaped	5146	5198	52	5168.86	21.9414	35.6397	13.6983	31.0248	325.491	345.816	20.3242	333.57	NW	3.30666e-05	4.13332e-05	4.95999e-05
421	Intact	T	9	92.1767	29.6641	9128.39	410.169	78.8902	153.308	Lobate-shaped	5093	5130	37	5110.5	19.2167	29.7357	10.519	26.1936	322.001	340.168	18.1666	330.999	NW	6.42311e-05	8.02889e-05	9.63467e-05
422	Intact	T	11	92.1768	29.6355	20880.7	604.626	182.484	124.814	Tongue-shaped	5261	5327	66	5293.17	9.26277	36.3175	27.0547	23.2218	266.987	318.857	51.8696	292.483	W	0.000173367	0.000216709	0.000260051
423	Intact	T	11	92.1771	29.6452	34668.5	959.366	364.919	132.549	Tongue-shaped	5049	5233	184	5117.95	15.1465	39.3462	24.1998	24.3886	0	358.586	358.586	164.084	S	0.000318562	0.000398203	0.000477843
424	Intact	T	9	92.1777	29.5378	8875.91	388.106	143.906	103.04	Tongue-shaped	5052	5101	49	5072.33	18.6075	36.5754	17.968	24.1219	10.2441	26.5651	16.321	18.5845	N	6.21052e-05	7.76315e-05	9.31578e-05
425	Intact	T	11	92.1782	29.6185	20244.9	689.862	75.8746	285.64	Lobate-shaped	5206	5239	33	5225.25	9.10372	33.0425	23.9388	17.6934	282.381	346.477	64.0961	321.319	NW	0.000167052	0.000208815	0.000250578
426	Intact	T	12	92.1794	29.6418	113848	2598.73	165.911	1170.97	Lobate-shaped	5051	5261	210	5171.34	1.55485	45.7128	44.158	15.508	0	357.709	357.709	258.28	W	0.00132697	0.00165871	0.00199046
427	Intact	T	11	92.1812	29.6229	113583	2027.68	164.054	801.345	Lobate-shaped	5133	5220	87	5165.79	2.71406	42.9547	40.2406	16.6883	230.194	352.875	122.681	302.728	NW	0.00132327	0.00165408	0.0019849
428	Intact	T	11	92.1812	29.5369	68023.7	1162.87	276.023	269.121	Tongue-shaped	5076	5211	135	5126.73	2.02692	45.7779	43.751	20.8152	2.41951	358.807	356.387	254.343	W	0.000715261	0.000894076	0.00107289
429	Intact	T	10	92.182	29.6271	20990.7	636.229	199.295	123.588	Tongue-shaped	5106	5159	53	5128.52	10.5907	32.9774	22.3866	20.2204	288.435	343.768	55.3327	317.108	NW	0.000174463	0.000218079	0.000261695
430	Intact	T	11	92.1837	29.6298	81941.9	1479.9	208.587	519.822	Lobate-shaped	5086	5171	85	5121.86	5.30449	40.3392	35.0347	19.556	206.565	343.072	136.507	301.806	NW	0.000894293	0.00111787	0.00134144
431	Intact	T	10	92.1839	29.5668	16358.5	662.715	100.724	267.093	Lobate-shaped	5262	5343	81	5296.85	13.7485	26.6489	12.9004	19.4872	225	302.276	77.2756	264.316	W	0.000129349	0.000161687	0.000194024
432	Intact	T	10	92.1852	29.6319	30398.3	797.627	270.581	128.148	Tongue-shaped	5067	5126	59	5094.94	1.09958	19.8689	18.7693	12.5135	116.565	334.747	218.182	290.341	W	0.000272076	0.000340096	0.000408115
433	Intact	T	12	92.1855	29.6334	39229.6	812.446	208.539	241.389	Lobate-shaped	5044	5109	65	5078.8	3.14593	25.9645	22.8186	15.6406	0	354.036	354.036	283.801	W	0.000369496	0.00046187	0.000554244
434	Intact	T	11	92.1859	29.6558	4291.9	316.289	125.353	60.2203	Tongue-shaped	4830	4870	40	4843	14.5094	36.2558	21.7464	24.7721	5.71059	339.444	333.733	252.175	W	2.59688e-05	3.2461e-05	3.89532e-05
435	Intact	T	11	92.1862	29.5096	7513.5	422.52	53.7111	172.42	Lobate-shaped	5118	5149	31	5133.25	13.057	28.7823	15.7253	19.9093	0	357.879	357.879	188.421	S	5.08491e-05	6.35613e-05	7.62736e-05
436	Intact	T	11	92.1871	29.6352	69704.4	1471.42	500.667	206.865	Tongue-shaped	5022	5167	145	5080.13	3.42096	36.4456	33.0246	17.9903	0	357.99	357.99	218.119	SW	0.00073652	0.00092065	0.00110478
437	Intact	T	11	92.1876	29.6453	6044.04	391.512	30.6785	167.924	Lobate-shaped	5247	5291	44	5270.62	22.5058	30.316	7.81018	25.709	324.36	358.363	34.0032	340.2	N	3.91621e-05	4.89526e-05	5.87431e-05
438	Intact	T	9	92.1879	29.5101	2699.34	223.476	46.1567	74.2221	Lobate-shaped	5094	5094	0	5094	18.7977	21.7874	2.98971	20.2925	3.07745	13.861	10.7836	8.46924	N	1.48861e-05	1.86076e-05	2.23291e-05
439	Intact	T	11	92.1908	29.6379	55886.4	1443.55	100.072	635.605	Lobate-shaped	4962	5050	88	5006.35	5.20205	33.3049	28.1028	17.4155	0.60309	359.341	358.738	198.707	S	0.000564988	0.000706236	0.000847483
440	Intact	T	11	92.1916	29.584	33751.9	1033.1	101.298	437.969	Lobate-shaped	5186	5285	99	5228.27	14.7629	41.6761	26.9132	26.1141	274.289	327.529	53.2397	298.014	NW	0.000308482	0.000385603	0.000462723
441	Intact	T	11	92.1934	29.5786	12298.3	478.887	158.811	112.893	Tongue-shaped	5201	5249	48	5222.13	11.209	33.97	22.761	21.4708	3.14496	355.684	352.539	249.913	W	9.18513e-05	0.000114814	0.000137777
442	Intact	T	11	92.1949	29.5214	2831.12	239.817	38.8407	81.4538	Lobate-shaped	5072	5081	9	5077	7.65216	22.4143	14.7621	13.0627	12.0115	318.691	306.68	103.143	E	1.57624e-05	1.9703e-05	2.36437e-05
443	Intact	T	11	92.1963	29.5214	6344.08	356.124	63.1361	132.255	Lobate-shaped	5057	5080	23	5069.11	7.33673	24.1656	16.8288	17.0971	0	358.831	358.831	59.0967	NE	4.15064e-05	5.1883e-05	6.22596e-05
444	Intact	T	11	92.1981	29.5216	10430.4	479.035	66.0898	201.878	Lobate-shaped	5028	5069	41	5052.36	7.27193	25.1159	17.8439	16.3882	0	356.326	356.326	73.4933	E	7.53763e-05	9.42204e-05	0.000113064
445	Intact	T	9	92.202	29.5293	23947.8	1036.04	66.4115	452.338	Lobate-shaped	5118	5176	58	5149.73	16.5106	38.3062	21.7956	29.4133	0.971021	358.862	357.891	27.0541	NE	0.000204358	0.000255447	0.000306537
446	Intact	T	11	92.2058	29.571	17065.8	544.369	127.475	193.005	Lobate-shaped	5154	5223	69	5192.05	16.9865	38.3809	21.3943	28.32	288.122	344.148	56.0262	310.5	NW	0.00013609	0.000170112	0.000204135
447	Relict	T	12	92.2098	29.7456	106265	1618.3	661.776	172.157	Tongue-shaped	5043	5242	199	5147.23	0.347755	36.0344	35.6866	17.0593	2.04541	352.057	350.011	267.821	W
448	Intact	T	9	92.2101	29.4689	9482.84	397.884	92.0719	90.9491	Tongue-shaped	5075	5115	40	5091.09	14.6312	37.0846	22.4535	23.5434	9.46232	356.73	347.267	309.232	NW	6.72355e-05	8.40443e-05	0.000100853
449	Relict	T	9	92.2105	29.7512	16353.2	520.137	114.854	144.179	Lobate-shaped	5078	5139	61	5112.63	20.5431	39.3616	18.8185	28.2589	337.574	357.901	20.327	346.507	N
450	Intact	T	11	92.2107	29.5946	37310	1369.43	81.3306	606.134	Lobate-shaped	5167	5216	49	5189.07	3.95876	27.3478	23.389	15.5878	8.61565	344.055	335.439	78.5856	E	0.000347907	0.000434884	0.00052186
451	Intact	T	12	92.211	29.5992	71785.4	1499.56	616.913	153.308	Tongue-shaped	5144	5336	192	5225.95	5.48177	30.8403	25.3585	18.5709	230.711	306.573	75.8624	263.489	W	0.000762984	0.00095373	0.00114448
452	Intact	T	9	92.2115	29.4711	15723.4	482.265	161.773	118.958	Tongue-shaped	5028	5110	82	5054.65	9.69927	46.8574	37.1582	28.3436	270	326.31	56.3099	299.376	NW	0.000123347	0.000154183	0.00018502
453	Relict	T	15	92.2118	29.6248	256853	2658.6	1156.19	253.803	Tongue-shaped	4958	5437	479	5144.61	2.43285	55.675	53.2422	21.9181	0	358.919	358.919	235.242	SW
454	Intact	T	11	92.2118	29.6136	106966	1810.11	679.554	205.705	Tongue-shaped	5157	5259	102	5200.38	1.96645	33.7291	31.7626	14.4085	0	358.58	358.58	141.153	SE	0.0012313	0.00153913	0.00184696
455	Intact	T	11	92.2126	29.5728	30508.8	818.393	107.382	328.68	Lobate-shaped	5218	5258	40	5237.91	9.78882	27.2525	17.4637	18.5047	216.573	298.202	81.6286	242.534	SW	0.000273264	0.00034158	0.000409896
456	Intact	T	9	92.2132	29.5605	15045.6	489.641	121.358	161.884	Lobate-shaped	5246	5297	51	5266.93	11.6503	38.8074	27.157	27.344	2.38594	62.2658	59.8799	28.2623	NE	0.000116994	0.000146243	0.000175491
457	Intact	T	11	92.2133	29.5899	60058.3	1554.31	114.73	683.039	Lobate-shaped	5196	5282	86	5232.16	2.19835	29.1919	26.9935	16.1536	14.7436	356.634	341.89	81.4733	E	0.000615971	0.000769963	0.000923956
458	Intact	T	11	92.2139	29.6769	18714.8	557.125	142.589	260.08	Lobate-shaped	5085	5144	59	5113.7	10.6776	27.8754	17.1977	22.7898	306.529	344.055	37.5258	325.376	NW	0.000152018	0.000190022	0.000228027
459	Intact	T	11	92.2149	29.5859	25908.4	775.025	113.693	318.764	Lobate-shaped	5257	5332	75	5289.39	9.18043	33.7389	24.5585	22.2054	3.91825	358.727	354.809	127.928	SE	0.000224596	0.000280745	0.000336893
460	Intact	T	9	92.2153	29.6114	84008.8	1756.7	210.206	715.948	Lobate-shaped	5220	5369	149	5274.05	4.19449	34.5406	30.3461	15.5879	3.01279	358.781	355.768	269.865	W	0.000921429	0.00115179	0.00138214
461	Intact	T	9	92.216	29.5587	12389.1	457.372	92.9747	169.496	Lobate-shaped	5213	5268	55	5241.5	21.0124	39.2512	18.2389	29.9235	13.8287	51.8924	38.0638	32.8601	NE	9.26659e-05	0.000115832	0.000138999
462	Intact	T	9	92.2162	29.6119	12345.2	667.729	291.282	71.4633	Tongue-shaped	5274	5418	144	5332.15	21.344	37.9627	16.6188	32.4932	258.977	270	11.0235	263.556	W	9.22722e-05	0.00011534	0.000138408
463	Relict	T	9	92.2163	29.5066	7034.6	353.926	100.916	67.0356	Tongue-shaped	5000	5022	22	5011.25	12.4448	23.7872	11.3423	18.8681	263.29	283.496	20.2056	275.249	W
464	Intact	T	10	92.2164	29.5842	4762.36	312.616	51.1424	120.297	Lobate-shaped	5361	5378	17	5367.86	26.2957	34.6143	8.31862	29.3301	1.4688	356.248	354.779	298.2	NW	2.94211e-05	3.67764e-05	4.41317e-05
465	Intact	T	9	92.2174	29.5844	3038.91	283.728	43.7713	114.14	Lobate-shaped	5377	5384	7	5380.5	33.5311	35.2122	1.68108	34.3716	306.573	318.945	12.3722	312.759	NW	1.71607e-05	2.14509e-05	2.5741e-05
466	Intact	T	11	92.2184	29.4931	19789.9	731.8	78.178	317.129	Lobate-shaped	5167	5236	69	5197.24	15.8704	32.6034	16.733	27.1373	315.666	357.709	42.0432	333.427	NW	0.000162556	0.000203195	0.000243834
467	Intact	T	9	92.2191	29.5286	49053.8	1378.03	86.9933	471.848	Lobate-shaped	4993	5043	50	5014.72	2.02692	29.1356	27.1087	18.4566	1.78991	358.977	357.187	129.192	SE	0.000483147	0.000603934	0.00072472
468	Intact	T	9	92.2199	29.5587	21788.9	679.283	99.4888	264.791	Lobate-shaped	5156	5225	69	5184.46	13.4643	39.2714	25.807	25.6084	0	358.919	358.919	214.623	SW	0.000182455	0.000228069	0.000273683
469	Intact	D	11	92.2206	29.6284	96982.4	1206.19	374.224	331.525	Tongue-shaped	5197	5277	80	5233.28	2.08564	44.0271	41.9415	13.4995	0.629598	358.229	357.599	180.849	S	0.00109472	0.0013684	0.00164208
470	Intact	T	10	92.2224	29.6027	16597.5	701.006	73.3585	302.942	Lobate-shaped	5289	5308	19	5295.06	3.10741	27.2897	24.1823	12.7827	18.4349	357.436	339.001	272.056	W	0.000131621	0.000164526	0.000197431
471	Intact	T	11	92.2229	29.5734	20985.4	738.566	82.4488	298.386	Lobate-shaped	5210	5245	35	5225.07	1.04316	19.5793	18.5362	10.1131	0.830315	357.51	356.68	53.9959	NE	0.000174411	0.000218013	0.000261616
472	Intact	D	13	92.2232	29.6169	50856.1	1097.22	416.931	122.562	Tongue-shaped	5280	5417	137	5330.85	4.18015	34.772	30.5919	19.3972	9.70665	354.806	345.099	85.2034	E	0.000504527	0.000630659	0.000756791
473	Relict	T	12	92.2245	29.765	76404.2	1273.3	514.61	192.897	Tongue-shaped	4917	5076	159	4964.66	3.95876	48.5694	44.6106	16.5962	0.838414	358.847	358.008	290.54	W
474	Intact	T	11	92.2248	29.6052	21230.8	974.083	65.1124	438.824	Lobate-shaped	5217	5272	55	5246.42	5.71636	24.3369	18.6206	16.1552	0	359.356	359.356	253.129	W	0.000176862	0.000221077	0.000265292
475	Intact	T	12	92.2251	29.5736	21144	566.372	181.692	155.545	Tongue-shaped	5200	5281	81	5227.4	6.46906	46.1944	39.7253	25.6082	0.400662	354.536	354.136	250.235	W	0.000175993	0.000219992	0.00026399
476	Intact	D	11	92.226	29.6188	79057.8	1371.49	355.333	210.669	Tongue-shaped	5132	5292	160	5238.36	2.64657	43.6161	40.9695	21.2249	5.07961	354.174	349.094	70.7956	E	0.000856655	0.00107082	0.00128498
477	Relict	T	8	92.2278	29.5861	7580.78	380.949	65.3804	156.895	Lobate-shaped	5241	5277	36	5255.75	23.8671	35.5383	11.6711	30.8263	324.09	341.917	17.8263	334.97	NW
478	Intact	T	10	92.2282	29.6096	81592.6	1760.86	170.552	775.078	Lobate-shaped	5143	5241	98	5184.59	2.33155	38.2724	35.9409	17.2875	0	357.745	357.745	279.148	W	0.00088972	0.00111215	0.00133458
479	Relict	T	13	92.2284	29.7637	34815.7	779.868	247.855	192.778	Tongue-shaped	4989	5122	133	5042.26	11.8978	43.8442	31.9464	26.5913	2.2026	354.352	352.149	69.3122	E
480	Intact	T	9	92.2286	29.6197	22474.7	598.51	183.058	136.055	Tongue-shaped	5071	5146	75	5111.74	14.7517	39.9302	25.1785	25.3882	0.855097	357.93	357.075	62.8639	NE	0.000189368	0.00023671	0.000284052
481	Intact	T	13	92.2294	29.5767	60507.6	2308.17	83.7247	1072.48	Lobate-shaped	5155	5207	52	5182.97	2.19835	31.5206	29.3222	16.1131	0	351.87	351.87	301.746	NW	0.000621504	0.00077688	0.000932256
482	Intact	T	9	92.2328	29.5615	20826.5	596.484	194.32	118.253	Tongue-shaped	5092	5202	110	5131.87	12.9921	42.0942	29.1021	26.7754	2.04541	359.341	357.296	44.9923	NE	0.000172827	0.000216034	0.000259241
483	Intact	T	11	92.2343	29.7591	13385.9	461.394	92.9065	175.015	Lobate-shaped	5194	5250	56	5218.59	12.0313	31.7725	19.7412	21.9676	8.90172	359.119	350.217	212.956	SW	0.000101683	0.000127104	0.000152525
484	Intact	T	10	92.2351	29.5551	28647.4	667.632	256.578	140.017	Tongue-shaped	5160	5239	79	5189.26	5.48177	37.1485	31.6667	24.6502	1.1233	358.264	357.141	110.437	E	0.000253382	0.000316727	0.000380073
485	Intact	T	13	92.2367	29.6067	70557.4	1390.56	218.312	620.465	Lobate-shaped	4979	5094	115	5048.55	3.20284	43.7179	40.5151	16.3305	1.00509	358.862	357.857	115.131	SE	0.000747349	0.000934186	0.00112102
486	Intact	T	9	92.2429	29.7712	16127.1	544.265	160.236	125.597	Tongue-shaped	5198	5260	62	5224.21	12.5537	42.9535	30.3997	25.0575	5.06362	354.71	349.646	35.4852	NE	0.000127157	0.000158946	0.000190736
487	Intact	T	10	92.2451	29.5228	14078.7	582.437	71.0941	252.406	Lobate-shaped	5169	5236	67	5208.72	20.6514	34.3765	13.7251	29.5354	0	30.0686	30.0686	12.1112	N	0.000108031	0.000135039	0.000162046
488	Relict	T	10	92.2453	29.7725	45633	891.686	175.129	345.06	Lobate-shaped	5179	5218	39	5199.54	2.02692	25.4502	23.4232	10.9525	0	358.603	358.603	203.463	SW
489	Intact	T	11	92.246	29.5196	73542.2	1525.11	411.377	160.612	Tongue-shaped	5147	5251	104	5200.74	0.777566	31.6389	30.8614	14.8577	0	358.025	358.025	68.5597	E	0.000785447	0.000981808	0.00117817
490	Relict	T	10	92.2466	29.8054	12822.6	514.983	116.716	129.608	Lobate-shaped	5104	5164	60	5134.86	25.587	38.9407	13.3537	32.1271	272.255	296.715	24.4601	289.342	W
491	Relict	T	11	92.2469	29.8035	9334.26	404.039	107.232	90.5164	Tongue-shaped	5166	5205	39	5184.25	16.4975	32.959	16.4615	25.0685	263.157	292.855	29.6976	278.128	W
492	Intact	T	11	92.2471	29.8071	41753.9	841.209	289.034	208.587	Tongue-shaped	5103	5217	114	5152.51	20.0103	37.1944	17.1842	28.2667	258.69	293.607	34.9171	274.898	W	0.000398207	0.000497759	0.00059731
493	Intact	T	11	92.2474	29.801	27087.8	801.503	108.267	317.238	Lobate-shaped	5213	5330	117	5248.13	10.3421	44.5362	34.1941	29.2702	14.0362	359.384	345.348	303.923	NW	0.00023692	0.00029615	0.00035538
494	Relict	T	10	92.2528	29.7959	23764.9	737.649	97.1075	302.076	Lobate-shaped	5187	5238	51	5213.23	9.85982	44.892	35.0322	22.7832	260.154	339.179	79.0249	295.828	NW
495	Intact	T	10	92.2539	29.8046	53652.6	1175.96	485.263	148.35	Tongue-shaped	5153	5249	96	5200.58	5.2819	41.075	35.7931	15.3885	1.63658	359.409	357.773	265.794	W	0.000537999	0.000672499	0.000806999
496	Relict	T	11	92.2544	29.7856	31305.1	787.263	249.14	178.196	Tongue-shaped	5167	5253	86	5204.68	10.1613	42.3664	32.205	20.7548	0.744058	358.958	358.214	79.0317	E
497	Intact	T	10	92.2574	29.7703	158650	1789.83	498.184	306.162	Tongue-shaped	5090	5286	196	5179.38	1.77267	46.9492	45.1765	17.7612	1.33222	357.955	356.622	84.7444	E	0.00197606	0.00247007	0.00296409
498	Relict	T	11	92.2576	29.7866	22402.4	591.832	168.809	146.211	Tongue-shaped	5195	5292	97	5227	12.6928	52.2288	39.536	29.1489	310.601	349.287	38.6856	334.251	NW
499	Intact	T	11	92.2603	29.805	22228.9	631.002	154.306	140.661	Tongue-shaped	5291	5361	70	5321.12	12.6168	43.2237	30.6069	26.833	263.019	332.969	69.9502	299.709	NW	0.000186885	0.000233606	0.000280328
500	Relict	T	11	92.2606	29.7615	66050.7	1242.52	513.024	165.555	Tongue-shaped	5092	5190	98	5142.92	1.55485	35.9326	34.3777	16.8494	56.8887	346.608	289.719	196.795	S
501	Relict	T	13	92.2609	29.7333	78168	1706.91	257.91	656.314	Lobate-shaped	4656	4811	155	4730.79	1.73826	40.4141	38.6758	21.9548	5.44033	358.394	352.954	311.4	NW
502	Relict	T	9	92.2618	29.7717	30615.6	834.397	126.477	223.795	Lobate-shaped	5016	5060	44	5035.28	4.62959	29.0589	24.4293	14.4159	2.1211	358.264	356.143	157.166	SE
503	Intact	T	10	92.2626	29.7684	19725.4	583.675	97.2077	226.237	Lobate-shaped	5138	5179	41	5154.91	3.2955	32.6794	29.3839	15.1577	0	357.274	357.274	195.228	S	0.000161921	0.000202401	0.000242882
504	Relict	T	12	92.265	29.7719	28556.7	794.086	143.286	235.18	Lobate-shaped	5007	5077	70	5035.53	5.90118	30.7094	24.8083	18.3829	0.744058	357.99	357.246	77.968	E
505	Intact	T	12	92.265	29.7571	359848	4627.72	1451.33	311.88	Tongue-shaped	4792	5248	456	5061.44	0.983516	42.7166	41.7331	16.7642	5.11731	354.806	349.688	104.356	E	0.00527977	0.00659971	0.00791965
506	Relict	T	13	92.2672	29.7234	16121.7	594.648	95.5684	213.913	Lobate-shaped	4973	5056	83	5007.68	16.3294	37.2094	20.88	30.4232	17.6501	49.6355	31.9853	32.899	NE
507	Relict	T	12	92.2682	29.7223	8949.89	422.602	105.473	89.8783	Tongue-shaped	5016	5052	36	5032	15.6452	36.5194	20.8742	26.3954	3.46823	55.3889	51.9206	36.0054	NE
508	Intact	T	13	92.2702	29.2932	87238.7	1570.65	190.354	670.46	Lobate-shaped	4679	4800	121	4743.53	8.15196	37.6297	29.4777	19.2455	4.14462	348.69	344.545	297.597	NW	0.000964103	0.00120513	0.00144615
509	Relict	T	13	92.2704	29.3066	58756.4	1175.26	402.562	132.954	Tongue-shaped	4455	4623	168	4530.71	6.95551	42.7018	35.7463	20.5224	2.93567	356.82	353.884	283.682	W
510	Relict	T	9	92.2704	29.7196	3592.7	256.726	92.6777	48.1575	Tongue-shaped	5106	5129	23	5114.75	14.0499	26.2905	12.2406	17.8301	10.6197	345.53	334.91	104.419	E
511	Relict	T	9	92.2707	29.7188	11028.6	512.016	203.282	49.1733	Tongue-shaped	5121	5191	70	5156.42	12.9921	27.5701	14.578	21.2961	9.63754	358.995	349.357	304.004	NW
512	Relict	T	9	92.2711	29.7203	18147.6	583.442	120.241	210.272	Lobate-shaped	5080	5129	49	5103.4	6.92133	39.0666	32.1453	23.2418	259.875	351.87	91.9946	302.217	NW
513	Intact	T	10	92.2712	29.2839	13848.2	572.212	74.9423	186.159	Lobate-shaped	4872	4903	31	4883.86	14.9856	30.1972	15.2116	23.5625	0	353.199	353.199	32.0285	NE	0.000105912	0.00013239	0.000158868
514	Intact	T	11	92.2726	29.8252	71328.4	1167.99	205.729	431.564	Lobate-shaped	5189	5319	130	5251.21	1.09958	56.0482	54.9486	27.0696	5.34544	302.829	297.483	246.498	SW	0.000757159	0.000946449	0.00113574
515	Intact	T	9	92.2728	29.2871	13892.6	548.154	153.382	138.016	Tongue-shaped	4986	5053	67	5009.75	16.2696	52.7417	36.4721	29.1474	210.677	257.535	46.8578	235.554	SW	0.000106319	0.000132899	0.000159479
516	Relict	T	11	92.2764	29.7322	10181.8	490	77.1502	186.509	Lobate-shaped	5033	5091	58	5063.92	25.7049	40.3536	14.6487	36.3	10.9228	40.7001	29.7773	25.1369	NE
517	Intact	T	12	92.2765	29.7267	6543.23	325.189	110.97	65.0352	Tongue-shaped	5146	5185	39	5167.25	17.2835	38.2005	20.917	30.0002	5.71059	358.62	352.909	106.389	E	4.30748e-05	5.38435e-05	6.46122e-05
518	Relict	T	10	92.2772	29.3093	28163.5	834.333	95.6717	347.343	Lobate-shaped	4475	4572	97	4525.64	9.36304	29.9061	20.5431	18.2797	290.462	352.011	61.5484	326.893	NW
519	Intact	T	12	92.2779	29.7868	59848.9	1113.91	363.359	136.353	Tongue-shaped	5127	5278	151	5211.78	11.9695	55.7411	43.7716	26.5264	238.601	346.551	107.951	280.405	W	0.000613395	0.000766743	0.000920092
520	Intact	T	11	92.2787	29.7219	15848.1	579.698	118.736	175.253	Lobate-shaped	5093	5178	85	5131.58	13.9783	41.684	27.7057	30.2816	27.3156	75.9638	48.6481	53.3315	NE	0.000124521	0.000155652	0.000186782
521	Intact	T	12	92.2789	29.7715	47500.5	914.551	191.714	284.675	Lobate-shaped	4973	5049	76	5007.77	9.74714	27.8613	18.1142	21.2175	2.48955	358.452	355.962	313.58	NW	0.000464847	0.000581059	0.00069727
522	Relict	T	10	92.2791	29.8332	16293.1	546.162	135.001	113.853	Tongue-shaped	5204	5281	77	5227.7	8.20951	37.2376	29.0281	22.5571	266.348	329.621	63.2731	300.817	NW
523	Intact	T	11	92.28	29.817	32115.4	716.173	228.727	153.833	Tongue-shaped	5219	5343	124	5270.55	11.8978	39.0517	27.1539	25.3795	260.218	337.135	76.9179	295.381	NW	0.000290622	0.000363277	0.000435933
524	Intact	T	12	92.2807	29.7821	11105.2	518.019	207.478	80.3309	Tongue-shaped	5290	5387	97	5328.57	12.367	37.2226	24.8556	24.561	48.0448	110.433	62.3881	64.9019	NE	8.12647e-05	0.000101581	0.000121897
525	Intact	T	11	92.2808	29.2782	87354.4	1552.29	680.549	141.407	Tongue-shaped	5243	5424	181	5344.26	2.11438	33.942	31.8276	18.6836	180	331.39	151.39	261.868	W	0.000965637	0.00120705	0.00144846
526	Intact	T	13	92.2809	29.8195	68382.3	1043.05	301.028	269.193	Tongue-shaped	5235	5355	120	5302.61	10.459	38.9249	28.4659	22.5296	193.393	266.634	73.241	225.12	SW	0.000719788	0.000899735	0.00107968
527	Intact	D	12	92.2811	29.2908	595739	3825.54	1574.35	442.084	Tongue-shaped	4791	5135	344	4951.95	0.983516	47.1684	46.1849	17.0325	0	359.484	359.484	237.041	SW	0.00966807	0.0120851	0.0145021
528	Intact	T	9	92.282	29.3011	31993.1	891.638	91.4084	352.336	Lobate-shaped	4777	4853	76	4813.27	10.1613	32.2471	22.0858	20.9063	0	358.807	358.807	171.406	S	0.000289295	0.000361619	0.000433942
529	Intact	T	11	92.2835	29.3071	20138.4	607.853	167.789	198.658	Lobate-shaped	4704	4754	50	4730.83	8.35153	32.9292	24.5777	20.0604	5.19443	347.32	342.125	310.783	NW	0.000165998	0.000207498	0.000248997
530	Intact	T	9	92.2838	29.3001	9960.29	444.246	178.404	81.4169	Tongue-shaped	4848	4936	88	4878.77	20.3042	45.0984	24.7943	28.6901	0	359.397	359.397	36.4177	NE	7.13179e-05	8.91474e-05	0.000106977
531	Intact	T	9	92.2845	29.2997	17032.4	715.746	226.137	124.844	Tongue-shaped	4866	4980	114	4905.95	15.2586	46.5733	31.3148	28.5876	1.14576	357.397	356.252	96.9526	E	0.00013577	0.000169712	0.000203655
532	Intact	T	11	92.2848	29.8359	85319.7	1476.59	631.415	203.516	Tongue-shaped	5137	5290	153	5227.64	3.54195	34.0023	30.4604	18.8664	1.08092	359.293	358.212	264.451	W	0.00093871	0.00117339	0.00140807
533	Intact	T	12	92.2857	29.3079	16683.3	497.657	110.57	176.482	Lobate-shaped	4718	4753	35	4732.19	10.481	34.0453	23.5642	19.4027	2.56377	356.055	353.491	296.923	NW	0.000132437	0.000165547	0.000198656
534	Intact	T	10	92.2859	29.8409	37435.5	717.989	207.42	210.072	Lobate-shaped	5184	5275	91	5232.47	12.2516	37.3778	25.1262	22.7156	255.801	316.102	60.3003	280.74	W	0.000349311	0.000436639	0.000523967
535	Intact	T	10	92.286	29.3014	18937.8	754.947	67.8379	331.376	Lobate-shaped	4836	4916	80	4861.76	6.80028	32.5741	25.7738	14.926	234.689	302.005	67.3166	260.716	W	0.000154194	0.000192743	0.000231291
536	Intact	T	11	92.286	29.8069	94349.3	1222.63	337.914	285.205	Tongue-shaped	5221	5385	164	5285.11	4.34904	54.6398	50.2907	23.2051	12.4259	154.654	142.228	77.035	E	0.00105915	0.00132394	0.00158873
537	Intact	T	11	92.2862	29.7853	122306	2633.4	122.041	1174.23	Lobate-shaped	5194	5342	148	5251.98	3.83539	54.7484	50.913	18.4713	28.6105	216.254	187.643	120.483	SE	0.00144614	0.00180768	0.00216921
538	Intact	T	12	92.2877	29.8346	40111.5	1086.89	136.384	457.696	Lobate-shaped	5248	5369	121	5282.13	2.02692	48.0641	46.0371	17.2619	2.1211	351.87	349.749	246.205	SW	0.000379486	0.000474357	0.000569228
539	Intact	T	12	92.2881	29.2983	113638	1782.35	233.103	682.155	Lobate-shaped	4873	5098	225	4969.99	3.95876	44.0468	40.0881	20.0806	0.590656	359.563	358.972	287.453	W	0.00132404	0.00165505	0.00198605
540	Relict	T	14	92.2882	29.8439	25397.5	673.896	204.104	144.62	Tongue-shaped	5158	5268	110	5207.23	16.0951	46.3137	30.2185	27.0062	279.819	311.583	31.7641	297.123	NW
541	Intact	T	12	92.2898	29.7881	116915	1814.32	225.612	701.968	Lobate-shaped	5215	5345	130	5279.27	5.15586	41.0936	35.9377	23.8657	180	277.16	97.1605	223.52	SW	0.00136998	0.00171248	0.00205497
542	Intact	T	14	92.29	29.2887	175098	2570.76	1162.72	230.13	Tongue-shaped	5063	5387	324	5229.21	1.09958	40.6671	39.5675	20.4208	0	354.523	354.523	231.375	SW	0.00222438	0.00278048	0.00333657
543	Intact	T	11	92.2903	29.8003	120537	1902.49	234.839	624.971	Lobate-shaped	5149	5328	179	5226.06	10.6722	47.7436	37.0714	24.7792	22.2176	109.654	87.4362	61.0684	NE	0.00142107	0.00177634	0.0021316
544	Relict	T	12	92.2904	29.8464	28787.4	793.897	342.932	83.3744	Tongue-shaped	5284	5370	86	5315.61	15.9764	44.9996	29.0231	30.5947	182.911	231.054	48.1434	201.636	S
545	Relict	T	12	92.2912	29.7776	58075.3	1101.66	183.682	377.657	Lobate-shaped	5123	5233	110	5175.29	11.6454	45.0149	33.3694	27.104	219.685	322.97	103.284	287.046	W
546	Intact	T	12	92.2916	29.7919	81821.6	1450.24	201.502	617.639	Lobate-shaped	5244	5390	146	5307.89	6.0606	38.5373	32.4767	19.4846	4.76364	278.746	273.983	59.1395	NE	0.000892717	0.0011159	0.00133908
547	Intact	T	13	92.2928	29.2964	165202	2130.48	891.438	246.556	Tongue-shaped	5061	5281	220	5153.72	1.09958	34.915	33.8154	16.3174	5.30093	358.112	352.811	254.147	W	0.00207439	0.00259299	0.00311159
548	Relict	T	11	92.2932	29.7801	22112.5	767.361	172.437	204.777	Lobate-shaped	5194	5244	50	5221.92	10.2295	26.2234	15.9939	18.3643	221.468	262.057	40.5888	243.118	SW
549	Intact	T	12	92.2932	29.2932	38902	765.52	245.295	170.361	Tongue-shaped	5148	5212	64	5168.43	2.33155	37.9282	35.5967	16.1239	6.34019	354.019	347.679	84.6446	E	0.000365796	0.000457245	0.000548694
550	Intact	T	13	92.2936	29.2707	255259	2826.35	1221.06	220.553	Tongue-shaped	5024	5449	425	5232.43	2.80149	49.2076	46.4061	22.0054	141.34	327.529	186.189	240.877	SW	0.00349663	0.00437079	0.00524495
551	Intact	T	10	92.296	29.7566	51230.8	1206.77	155.446	474.547	Lobate-shaped	5064	5120	56	5090.53	7.42487	30.0174	22.5926	17.5063	287.241	355.855	68.6139	319.459	NW	0.000508991	0.000636239	0.000763486
552	Intact	D	14	92.2971	29.2654	336844	3749.33	1761.43	245.424	Tongue-shaped	4941	5519	578	5206.75	1.55485	48.3228	46.768	20.1737	54.4623	315	260.538	206.477	SW	0.00487739	0.00609673	0.00731608
553	Intact	T	9	92.2975	29.3111	21459.9	620.457	112.719	225.519	Lobate-shaped	4708	4763	55	4733.73	13.5143	43.8767	30.3625	22.9602	0	354.428	354.428	137.714	SE	0.000179153	0.000223942	0.00026873
554	Relict	T	9	92.2985	29.7729	6590.08	349.259	60.3491	147.197	Lobate-shaped	5182	5202	20	5192.12	20.5258	33.7422	13.2164	26.6771	19.0108	46.828	27.8172	33.8553	NE
555	Intact	T	9	92.299	29.2525	16364.4	664.432	292.665	77.9844	Tongue-shaped	4980	5151	171	5046.5	26.2234	42.7141	16.4907	32.092	214.756	272.386	57.63	239.45	SW	0.000129406	0.000161757	0.000194109
556	Relict	T	11	92.2991	29.7674	182456	2080	591.505	296.44	Tongue-shaped	5067	5295	228	5170.6	2.22563	52.4947	50.2691	21.2097	0	359.556	359.556	87.4243	E
557	Relict	T	15	92.2991	29.7984	246067	2844.13	620.25	305.803	Tongue-shaped	5042	5336	294	5148.49	1.87208	51.7955	49.9234	18.2503	0	359.256	359.256	183.493	S
558	Intact	T	12	92.2999	29.319	120005	2007.72	666.985	189.518	Tongue-shaped	4686	4905	219	4797.31	3.88212	33.1391	29.257	17.2964	236.768	357.274	120.505	289.4	W	0.00141356	0.00176695	0.00212033
559	Intact	T	13	92.3002	29.7821	184725	2719.57	985.076	188.48	Tongue-shaped	5088	5315	227	5185.65	2.45752	47.5008	45.0433	16.4276	11.3099	132.879	121.569	62.207	NE	0.00237194	0.00296492	0.00355791
560	Relict	T	10	92.3004	29.7722	5968.84	305.497	78.3437	69.0258	Tongue-shaped	5148	5203	55	5174.5	15.6766	36.3119	20.6353	25.9699	21.8014	44.2748	22.4734	29.5781	NE
561	Intact	T	12	92.3009	29.2557	183510	2150.44	924.138	297.159	Tongue-shaped	5017	5398	381	5148.86	0	45.1674	45.1674	22.7027	-1	337.913	338.913	238.594	SW	0.00235323	0.00294154	0.00352984
562	Intact	T	10	92.3012	29.3025	229786	2981.27	1170.8	275.007	Tongue-shaped	4769	5196	427	5008.13	0.777566	45.5361	44.7585	24.6672	0	359.582	359.582	115.271	SE	0.0030822	0.00385275	0.0046233
563	Relict	T	13	92.3016	29.8703	59651.4	1377.14	140.459	600.835	Lobate-shaped	4809	4889	80	4849.8	4.71934	29.5508	24.8314	18.4918	5.9806	359.076	353.095	277.587	W
564	Intact	T	12	92.3026	29.8342	107932	1662.51	285.05	623.599	Lobate-shaped	5246	5366	120	5297.33	0.347755	39.8193	39.4716	17.4242	3.2397	357.397	354.158	48.7498	NE	0.00124467	0.00155584	0.00186701
565	Intact	T	9	92.3027	29.7524	31265.4	1152.94	65.4853	539.896	Lobate-shaped	4918	5044	126	4992.14	10.3477	45.3751	35.0273	23.7085	2.33731	355.657	353.319	41.9051	NE	0.000281417	0.000351771	0.000422125
566	Relict	D	12	92.3027	29.8379	145181	1779.72	554.1	290.068	Tongue-shaped	5143	5301	158	5215.21	0.777566	45.1971	44.4196	18.5844	3.81407	355.972	352.158	73.7193	E
567	Relict	T	10	92.3028	29.7671	74867.5	1187.18	485.171	225.617	Tongue-shaped	5025	5265	240	5123.95	9.98277	46.3218	36.3391	28.8713	3.60128	358.025	354.424	62.6852	NE
568	Relict	T	11	92.3028	29.7986	48413.5	1300.32	220.769	145.357	Tongue-shaped	5079	5275	196	5150.98	9.36304	45.1225	35.7595	27.5759	4.63546	358.636	354.001	306.684	NW
569	Intact	T	9	92.3037	29.3147	62284.9	1234.95	549.472	115.936	Tongue-shaped	4904	5215	311	5063.04	18.6496	46.7883	28.1387	31.2103	235.508	318.424	82.9158	287.324	W	0.000643476	0.000804345	0.000965214
570	Intact	T	14	92.3041	29.3103	552657	4410.88	1586.16	351.137	Tongue-shaped	4746	5303	557	5069.52	1.73826	41.5519	39.8136	19.3626	0.616059	357.184	356.568	264.062	W	0.00883527	0.0110441	0.0132529
571	Relict	T	11	92.3041	29.7628	34897.8	731.066	273.67	139.995	Tongue-shaped	5107	5145	38	5123.4	0.777566	30.7212	29.9437	10.6302	6.34019	357.614	351.274	110.233	E
572	Intact	T	9	92.3044	29.304	53842.3	1184.47	446.653	133.047	Tongue-shaped	5083	5246	163	5164.69	0.777566	38.7018	37.9243	18.8217	0	359.293	359.293	272.933	W	0.000540283	0.000675354	0.000810424
573	Relict	T	13	92.3046	29.8225	540624	3841.98	477.149	1591.37	Lobate-shaped	4964	5233	269	5126.59	0.347755	45.7764	45.4287	19.3544	0	359.542	359.542	79.8076	E
574	Relict	T	9	92.3052	29.8535	20018.5	702.112	287.094	105.519	Tongue-shaped	5338	5406	68	5359.92	6.05077	30.9959	24.9451	18.0507	13.6713	160.017	146.346	84.0408	E
575	Relict	T	10	92.3055	29.797	46302.2	1132.04	253.52	142.915	Tongue-shaped	5163	5311	148	5240.84	7.27193	42.1154	34.8435	24.2452	1.4688	358.877	357.408	65.2283	NE
576	Intact	T	10	92.3055	29.2993	86559.8	1427.23	567.647	246.633	Tongue-shaped	5238	5364	126	5287.61	1.09958	42.5703	41.4707	14.045	0	359.64	359.64	256.78	W	0.000955107	0.00119388	0.00143266
577	Relict	T	12	92.3056	29.7638	31280.2	833.77	186.435	222.161	Lobate-shaped	5072	5126	54	5103.26	1.55485	28.2316	26.6768	15.8294	1.4688	359.384	357.915	245.316	SW
578	Relict	T	14	92.306	29.8027	145038	2234.61	777.131	140.235	Tongue-shaped	4959	5203	244	5111.61	1.55485	42.6795	41.1247	22.3806	108.435	338.286	229.851	285.776	W
579	Relict	T	12	92.3065	29.7823	49694.7	1014.91	219.709	272.72	Lobate-shaped	5066	5150	84	5112.82	6.81771	54.8992	48.0815	21.1325	3.36646	358.995	355.628	221.031	SW
580	Intact	D	12	92.3069	29.2687	56783.3	1131.99	226.764	201.743	Tongue-shaped	5370	5457	87	5412.67	1.25366	39.6813	38.4277	16.3606	0	355.914	355.914	124.072	SE	0.000575887	0.000719859	0.00086383
581	Intact	D	11	92.3074	29.797	64621.6	1237.68	373.815	185.555	Tongue-shaped	5181	5312	131	5218.56	3.69162	52.5199	48.8283	22.5188	4.34086	355.292	350.951	139.717	SE	0.000672552	0.00084069	0.00100883
582	Relict	T	11	92.3089	29.8516	102341	1771.34	804.053	188.844	Tongue-shaped	5167	5358	191	5248	5.38279	49.1578	43.775	22.538	20.7723	155.472	134.7	90.1345	E
583	Intact	D	11	92.3089	29.2696	29276.7	676.024	199.197	159.301	Tongue-shaped	5362	5422	60	5392.3	10.3197	25.066	14.7462	16.8603	106.314	186.483	80.1692	150.297	SE	0.000260075	0.000325094	0.000390112
584	Intact	T	12	92.3105	29.8583	122247	2187.11	305.527	825.993	Lobate-shaped	5156	5440	284	5270.66	1.73826	54.2189	52.4807	19.4749	1.39718	358.781	357.384	81.092	E	0.0014453	0.00180663	0.00216795
585	Intact	T	9	92.3107	29.7742	30139.6	828.622	120.655	287.225	Lobate-shaped	5037	5118	81	5068.88	10.3701	45.3751	35.005	25.999	2.04541	357.614	355.569	274.926	W	0.0002693	0.000336625	0.00040395
586	Relict	T	11	92.311	29.7814	49402.7	1077.4	176.365	350.847	Lobate-shaped	4979	5091	112	5021.82	13.1987	42.9687	29.77	28.6942	17.0079	80.2934	63.2854	45.1004	NE
587	Relict	T	11	92.311	29.8044	67972.2	1154.54	394.714	185.938	Tongue-shaped	4998	5152	154	5097.73	1.43355	42.62	41.1865	20.1082	0	358.636	358.636	286.174	W
588	Intact	D	13	92.3112	29.2702	48558.6	982.04	383.594	181.245	Tongue-shaped	5360	5508	148	5421.45	7.00646	39.5299	32.5234	22.2303	125.538	246.801	121.264	193.512	S	0.0004773	0.000596626	0.000715951
589	Intact	T	12	92.3113	29.7897	19136.1	603.563	143.427	149.194	Lobate-shaped	5184	5242	58	5210.35	7.12387	27.0407	19.9168	19.6677	9.46232	105.945	96.4831	43.1635	NE	0.000156134	0.000195167	0.000234201
590	Relict	T	13	92.3114	29.8437	529052	3655.28	439	1549	Lobate-shaped	5054	5215	161	5133.4	0.695485	40.6026	39.9071	14.2401	0	359.193	359.193	226.906	SW
591	Intact	T	12	92.3114	29.2589	146374	1697.38	191.597	671.957	Lobate-shaped	5224	5382	158	5325.12	1.77267	34.9109	33.1382	16.1695	0	183.366	183.366	75.7169	E	0.00179403	0.00224253	0.00269104
592	Intact	T	11	92.3116	29.7665	39574.4	1160.95	382.068	181.27	Tongue-shaped	4856	5011	155	4933	8.72952	33.4623	24.7328	23.7314	0	356.775	356.775	37.3775	NE	0.000373396	0.000466745	0.000560093
593	Intact	D	13	92.3132	29.2639	313593	2441.37	738.507	505.693	Tongue-shaped	5203	5414	211	5302.37	2.71406	41.5459	38.8318	16.7444	2.29061	338.199	335.908	102.336	E	0.00447623	0.00559529	0.00671435
594	Intact	D	11	92.3132	29.2683	44674.2	821.172	197.231	290.289	Lobate-shaped	5249	5372	123	5311.5	10.618	37.752	27.134	22.7573	121.293	183.077	61.7844	150.468	SE	0.000431858	0.000539822	0.000647787
595	Intact	T	13	92.3132	29.7891	19893.1	673.508	110.521	182.678	Lobate-shaped	5168	5219	51	5191.08	9.31305	31.2368	21.9237	20.6982	9.46232	353.991	344.529	43.3836	NE	0.000163574	0.000204468	0.000245361
596	Intact	D	14	92.3134	29.3258	703723	5062.23	2178.75	330.729	Tongue-shaped	4689	5294	605	4980.11	0.777566	47.172	46.3944	20.3705	0	359.275	359.275	204.697	SW	0.0118074	0.0147593	0.0177111
597	Relict	T	12	92.3136	29.7395	57757	1621.8	189.93	373.371	Lobate-shaped	4607	4703	96	4654.93	11.502	31.5206	20.0186	19.7402	233.973	318.879	84.9059	273.519	W
598	Intact	D	14	92.314	29.8661	284901	3388.7	1451.32	209.551	Tongue-shaped	4797	5168	371	5035.18	0.347755	42.0265	41.6787	17.317	0	359.119	359.119	155.474	SE	0.00398937	0.00498671	0.00598406
599	Relict	T	11	92.3145	29.8032	27829.7	802.449	130.339	269.696	Lobate-shaped	5162	5196	34	5178.12	4.81983	27.9624	23.1426	12.8938	14.0362	349.287	335.251	122.213	SE
600	Intact	T	15	92.3156	29.7894	26497.5	769.796	266.715	150.498	Tongue-shaped	5088	5195	107	5135.63	10.547	34.4823	23.9353	21.8231	13.8287	55.2222	41.3935	36.5008	NE	0.000230737	0.000288422	0.000346106
601	Intact	D	12	92.316	29.2893	273746	2134.55	778.978	388.248	Tongue-shaped	5276	5554	278	5387.23	1.04316	42.6107	41.5676	21.6815	27.1213	315	287.879	116.901	SE	0.00380268	0.00475335	0.00570402
602	Intact	T	13	92.3176	29.2653	172439	2539.89	281.003	1025.54	Lobate-shaped	5091	5359	268	5235.15	6.6144	47.5888	40.9744	25.7525	137.663	306.634	168.971	208.333	SW	0.00218391	0.00272989	0.00327587
603	Relict	T	13	92.3188	29.8509	95718.9	1386.82	481.056	238.847	Tongue-shaped	4974	5096	122	5040.35	1.25366	32.6268	31.3732	14.7684	0	355.764	355.764	177.248	S
604	Relict	T	13	92.319	29.8655	81764.4	1396.45	541.147	151.483	Tongue-shaped	5085	5309	224	5192.29	8.52554	39.8611	31.3356	24.1995	0.412192	349.509	349.096	35.5025	NE
605	Intact	T	11	92.3191	29.7886	78920.5	1531.25	161.411	616.25	Lobate-shaped	5029	5166	137	5087.26	1.77267	31.2202	29.4476	16.7107	6.00901	146.31	140.301	41.3831	NE	0.000854871	0.00106859	0.00128231
606	Intact	T	12	92.3198	29.2572	180333	2360.7	975.46	285.55	Tongue-shaped	4950	5271	321	5102.62	6.23494	42.5278	36.2929	21.3035	3.01279	353.29	350.277	72.6247	E	0.00230442	0.00288052	0.00345663
607	Intact	T	12	92.3202	29.3195	93623.6	1238.12	332.537	261.06	Tongue-shaped	5112	5240	128	5149.07	2.45752	37.5366	35.0791	19.4274	2.00955	358.315	356.306	225.21	SW	0.00104939	0.00131173	0.00157408
608	Intact	D	12	92.3206	29.3335	218891	2394.86	931.579	259.597	Tongue-shaped	4585	5089	504	4888.96	1.96645	44.5013	42.5349	28.3955	0	356.987	356.987	292.865	NW	0.00290768	0.0036346	0.00436152
609	Intact	T	12	92.3213	29.3244	97574.2	2013.6	914.179	136.76	Tongue-shaped	5036	5268	232	5156.89	4.71934	39.6836	34.9642	16.6018	194.036	332.879	138.842	265.064	W	0.00110274	0.00137843	0.00165412
610	Relict	T	12	92.3219	29.8641	5913.79	312.147	124.762	65.7718	Tongue-shaped	5148	5188	40	5168.12	19.6083	29.0937	9.48542	23.4604	3.28924	359.31	356.02	264.476	W
611	Intact	D	15	92.3229	29.2807	460026	4397.34	1756.9	739.754	Tongue-shaped	4968	5425	457	5107.25	1.87208	47.7553	45.8832	17.5325	1.16914	359.37	358.201	118.027	SE	0.00708943	0.00886178	0.0106341
612	Relict	T	12	92.3233	29.8529	46874.3	1011.37	213.749	340.193	Lobate-shaped	4938	4989	51	4962.44	3.74016	26.9122	23.1721	14.8117	0.971021	358.531	357.56	177.671	S
613	Intact	T	11	92.3234	29.808	57737.5	1092.57	362.876	172.254	Tongue-shaped	5078	5208	130	5134.78	2.11438	34.2774	32.163	18.4749	0	358.299	358.299	62.0012	NE	0.000587519	0.000734399	0.000881278
614	Intact	T	11	92.3238	29.2865	85011.5	1195.55	237.771	436.434	Lobate-shaped	5063	5244	181	5148.16	2.43285	45.5589	43.1261	22.7183	61.2602	268.363	207.103	145.143	SE	0.000934643	0.0011683	0.00140196
615	Intact	T	11	92.3241	29.3087	36105.8	772.795	179.129	277.066	Lobate-shaped	5390	5449	59	5418.57	2.33155	39.0218	36.6903	19.3985	102.995	343.61	240.616	185.038	S	0.000334476	0.000418095	0.000501714
616	Intact	T	11	92.3247	29.3223	185314	1979.39	764.145	311.589	Tongue-shaped	5066	5338	272	5193.53	1.77267	57.8448	56.0722	23.7069	225	358.025	133.025	299.285	NW	0.00238102	0.00297627	0.00357153
617	Relict	T	14	92.3261	29.8355	101383	1431.32	336.086	327.041	Tongue-shaped	4784	4911	127	4830.08	3.88212	42.7295	38.8474	19.6665	0	357.709	357.709	298.115	NW
618	Intact	T	11	92.3261	29.8068	23406.2	617.454	174.067	135.959	Tongue-shaped	5124	5234	110	5160.9	14.3517	48.354	34.0022	28.1422	0.290838	357.026	356.735	227.037	SW	0.000198825	0.000248531	0.000298237
619	Intact	T	12	92.3262	29.2751	243587	2936.91	1152.72	283.212	Tongue-shaped	4809	5224	415	5020.86	1.55485	50.5924	49.0376	22.7855	0	358.688	358.688	172.356	S	0.00330566	0.00413208	0.00495849
620	Intact	T	11	92.3263	29.2913	20435.6	540.768	166.859	142.053	Tongue-shaped	5251	5314	63	5282.88	3.7562	40.4055	36.6493	20.976	3.81407	357.274	353.46	141.94	SE	0.000168942	0.000211177	0.000253413
621	Intact	T	11	92.3272	29.3054	47548.4	1205.25	111.975	499.1	Lobate-shaped	5211	5371	160	5280.57	7.58239	42.4853	34.9029	22.5124	110.095	230.906	120.811	163.55	S	0.00046541	0.000581763	0.000698115
622	Intact	T	11	92.3293	29.3225	68095	1078.05	257.406	315.071	Lobate-shaped	5274	5385	111	5318.9	3.10741	50.7491	47.6417	20.6083	0	357.436	357.436	199.77	S	0.000716161	0.000895201	0.00107424
623	Intact	D	13	92.3308	29.333	512601	4237.44	1809.48	351.718	Tongue-shaped	4838	5265	427	5047.94	0.695485	51.0267	50.3312	14.4386	0	359.31	359.31	209.801	SW	0.00807249	0.0100906	0.0121087
624	Relict	D	14	92.3313	29.8059	211809	2210.8	966.79	261.869	Tongue-shaped	4989	5193	204	5112.76	2.19835	39.0258	36.8274	12.8962	0	355.156	355.156	78.8932	E
625	Relict	T	12	92.3314	29.8097	14201	485.725	164.833	75.4259	Tongue-shaped	5108	5142	34	5125.41	6.65914	19.2167	12.5575	13.1083	97.3524	163.009	65.6568	134.116	SE
626	Intact	D	13	92.332	29.3126	191821	2108.02	733.864	316.563	Tongue-shaped	5151	5341	190	5220.41	1.47509	34.8089	33.3338	12.4485	0	357.274	357.274	89.8123	E	0.0024817	0.00310212	0.00372254
627	Intact	T	10	92.332	29.2848	40732.7	1016.79	354.216	159.116	Tongue-shaped	4974	5065	91	5013.48	1.25366	30.4566	29.203	14.2504	5.52754	341.565	336.038	133.545	SE	0.000386548	0.000483186	0.000579823
628	Intact	D	14	92.3329	29.2695	342210	3452.34	1480.23	285.944	Tongue-shaped	4811	5231	420	5024.41	2.22563	48.3095	46.0839	17.8574	0	358.877	358.877	82.3061	E	0.00497078	0.00621347	0.00745616
629	Intact	D	12	92.3345	29.2962	315767	2917.64	1051.5	292.071	Tongue-shaped	4912	5226	314	5024.23	0	45.7604	45.7604	16.1746	-1	359.119	360.119	79.2117	E	0.00451349	0.00564187	0.00677024
630	Intact	T	11	92.3353	29.319	43375.4	892.248	274.235	142.603	Tongue-shaped	5308	5367	59	5335.6	5.15586	32.799	27.6431	15.1345	64.6538	205.145	140.491	134.368	SE	0.000416835	0.000521044	0.000625253
631	Intact	T	12	92.3358	29.3136	144792	1742.53	664.729	323.868	Tongue-shaped	5064	5269	205	5168.16	2.11438	44.3177	42.2033	19.3281	0	359.454	359.454	123.471	SE	0.00177078	0.00221348	0.00265617
632	Intact	T	10	92.3361	29.2871	70834.5	2031.92	345.759	209.249	Tongue-shaped	4862	5100	238	4965.58	6.72127	47.2343	40.513	24.3048	43.7811	159.444	115.663	108.54	E	0.000750873	0.000938591	0.00112631
633	Intact	T	10	92.3372	29.3115	33833.3	744.128	239.089	152.937	Tongue-shaped	5071	5184	113	5128	13.9062	35.2381	21.3319	26.641	27.5042	77.8285	50.3243	55.1085	NE	0.000309376	0.00038672	0.000464064
634	Intact	D	12	92.3375	29.3374	338338	3634.57	1567.51	206.136	Tongue-shaped	4889	5240	351	5032.52	1.09958	47.6727	46.5731	16.5834	0	359.341	359.341	144.802	SE	0.00490335	0.00612919	0.00735503
635	Relict	T	9	92.3389	29.2738	46355.9	1095.71	340.667	107.514	Tongue-shaped	4617	4816	199	4705.49	14.9414	40.2232	25.2818	25.4398	59.7436	161.565	101.821	96.7887	E
636	Relict	T	14	92.3424	29.3028	262373	2553.59	1003.56	248.388	Tongue-shaped	4835	5121	286	4975.68	1.25366	38.0741	36.8205	16.2682	31.8274	212.196	180.368	107.994	E
637	Relict	T	12	92.3425	29.2991	55953.7	970.678	382.732	157.118	Tongue-shaped	4817	4977	160	4894.06	5.58965	40.7319	35.1423	22.6783	69.5672	133.807	64.2393	99.4689	E
638	Intact	D	14	92.3427	29.316	321305	3367.38	1226.91	342.547	Tongue-shaped	4966	5355	389	5121.08	1.25366	43.4415	42.1878	16.6623	10.3048	309.806	299.501	113.928	SE	0.00460865	0.00576081	0.00691297
639	Intact	D	12	92.3435	29.3439	51833.1	1151.16	202.514	305.404	Lobate-shaped	4873	4971	98	4930	9.46218	28.5953	19.1331	16.4867	3.57633	357.769	354.192	260.912	W	0.00051618	0.000645225	0.00077427
640	Intact	D	13	92.3445	29.3371	276210	2732.74	1119.31	286.93	Tongue-shaped	4993	5248	255	5076.98	0.695485	57.4528	56.7573	15.619	0	358.531	358.531	194.784	S	0.00384378	0.00480473	0.00576568
641	Intact	D	12	92.3466	29.3249	156370	1956.61	812.015	194.344	Tongue-shaped	5095	5303	208	5176.97	3.14593	40.5029	37.357	17.3041	24.0013	213.887	189.886	93.4111	E	0.00194204	0.00242754	0.00291305
642	Intact	T	10	92.3493	29.3418	31540	808.651	306.503	179.531	Tongue-shaped	5009	5095	86	5046.46	7.60572	27.1535	19.5477	17.5605	0.725224	358.603	357.878	271.786	W	0.000284385	0.000355481	0.000426577
643	Intact	T	10	92.35	29.3439	48799.3	1295.79	126.063	570.092	Lobate-shaped	4973	5056	83	5008.83	12.1631	37.9955	25.8324	24.1582	256.139	329.826	73.6875	289.048	W	0.000480141	0.000600176	0.000720211
644	Intact	D	12	92.3501	29.339	159368	1765.51	649.851	239.523	Tongue-shaped	5070	5201	131	5124.14	2.11438	45.0648	42.9505	14.3153	0	358.603	358.603	152.104	SE	0.0019868	0.00248351	0.00298021
645	Relict	T	12	92.3504	29.2769	56837.3	1342.44	517.05	90.1186	Tongue-shaped	4470	4692	222	4571.43	8.9482	39.7924	30.8442	23.6712	214.634	281.31	66.6763	245.497	SW
646	Intact	D	13	92.3545	29.3425	389968	3354.87	1323.82	324.63	Tongue-shaped	4984	5321	337	5108.77	0.347755	44.6627	44.3149	17.6397	0.90938	359.145	358.236	192.548	S	0.00581443	0.00726803	0.00872164
647	Relict	T	12	92.3553	29.279	73419.9	1605.1	677.977	95.4099	Tongue-shaped	4701	5019	318	4863.19	7.67527	36.1365	28.4613	25.987	200.136	345.838	145.702	253.282	W
648	Intact	T	14	92.356	29.2977	91581.6	1757.85	716.873	241.135	Tongue-shaped	4819	5080	261	4912.7	1.25366	41.3424	40.0887	20.3739	182.291	325.376	143.085	297.046	NW	0.00102198	0.00127748	0.00153297
649	Relict	T	11	92.3608	29.784	186594	2000.84	297.96	840.576	Lobate-shaped	4836	4916	80	4880.96	0.491794	28.0706	27.5789	11.3092	0	358.603	358.603	256.114	W
650	Intact	D	12	92.3617	29.3492	222452	2656.35	1005.76	214.978	Tongue-shaped	4909	5177	268	5019.99	0.983516	51.6546	50.6711	19.7295	0	359.061	359.061	201.601	S	0.00296452	0.00370566	0.00444679
651	Intact	D	12	92.3637	29.2611	291912	2561.74	1007.36	322.054	Tongue-shaped	4668	5007	339	4865.76	1.73826	49.8053	48.067	20.3113	0	358.363	358.363	252.281	W	0.00410747	0.00513434	0.0061612
652	Intact	D	14	92.3641	29.2738	368678	4199	1542.91	378.488	Tongue-shaped	4661	5143	482	4939.23	2.64657	53.3636	50.7171	22.0619	8.36589	358.025	349.659	264.136	W	0.00543563	0.00679453	0.00815344
653	Intact	T	11	92.3641	29.8045	7704.92	343.484	64.5424	130.162	Lobate-shaped	5003	5036	33	5020.67	24.7802	39.8589	15.0787	31.9965	313.652	345.107	31.4544	324.068	NW	5.24076e-05	6.55095e-05	7.86114e-05
654	Intact	D	14	92.3642	29.2935	417012	4020.19	1821.09	311.172	Tongue-shaped	4909	5368	459	5090.39	0	38.3194	38.3194	14.8996	-1	357.117	358.117	260.951	W	0.0063016	0.007877	0.0094524
655	Intact	T	10	92.3645	29.2866	51143.4	1037.88	160.235	375.238	Lobate-shaped	4958	5107	149	5013.3	8.13028	34.7474	26.6171	23.1604	254.358	351.714	97.3564	329.119	NW	0.000507949	0.000634937	0.000761924
656	Intact	D	13	92.3649	29.2814	197832	2135.63	845.16	309.622	Tongue-shaped	4965	5259	294	5053.46	4.06359	52.0356	47.972	24.6923	0	359.061	359.061	233.891	SW	0.0025753	0.00321913	0.00386295
657	Intact	T	10	92.3651	29.3024	84863.8	1354.47	195.516	479.648	Lobate-shaped	4938	5000	62	4964.29	0.777566	36.3835	35.6059	12.3009	0	359.193	359.193	142.126	SE	0.000932694	0.00116587	0.00139904
658	Intact	T	9	92.3667	29.3571	45715.2	972.376	303.086	148.645	Tongue-shaped	4550	4762	212	4639.09	16.7281	50.3365	33.6084	32.795	0.868051	358.363	357.495	32.8289	NE	0.000443961	0.000554952	0.000665942
659	Intact	T	11	92.3668	29.7918	41833.2	1024.86	131.217	411.089	Lobate-shaped	4894	4955	61	4922.3	12.1958	32.0703	19.8745	20.5499	1.93059	359.534	357.604	320.158	NW	0.000399115	0.000498894	0.000598672
660	Intact	T	11	92.3673	29.3387	69638.6	1079.32	225.728	437.924	Lobate-shaped	5200	5353	153	5275.44	0.695485	43.9994	43.3039	21.0633	56.1649	200.225	144.06	112.048	E	0.000735686	0.000919608	0.00110353
661	Intact	T	10	92.3674	29.2865	28760.4	661.761	196.348	191.748	Tongue-shaped	5039	5113	74	5066.29	2.86531	41.6688	38.8035	21.7379	2.2026	359.17	356.967	292.625	NW	0.000254581	0.000318226	0.000381871
662	Intact	T	10	92.3678	29.3008	41747.3	1060.36	293.73	157.42	Tongue-shaped	4966	5103	137	5030.69	12.4037	41.9396	29.5359	24.9935	0.744058	357.847	357.103	182.484	S	0.000398131	0.000497664	0.000597197
663	Intact	T	10	92.3697	29.3001	120243	1892.95	750.659	263.783	Tongue-shaped	4994	5218	224	5075.65	2.08564	38.8265	36.7408	19.1615	0	358.152	358.152	106.868	E	0.00141691	0.00177114	0.00212537
664	Intact	T	11	92.3705	29.3128	132342	1830.63	396.394	410.716	Lobate-shaped	5034	5323	289	5108.46	6.05077	49.7233	43.6726	23.874	0	358.995	358.995	197.095	S	0.00158967	0.00198709	0.00238451
665	Intact	T	11	92.3707	29.7924	36084.6	817.234	135.108	308.696	Lobate-shaped	4919	5013	94	4952.13	7.67527	43.9246	36.2493	28.6277	312.879	358.919	46.0402	344.921	N	0.00033424	0.0004178	0.00050136
666	Intact	T	9	92.3712	29.3538	38797.5	886.241	163.228	264.805	Lobate-shaped	4714	4826	112	4775.23	16.4549	42.4527	25.9978	32.2364	3.55173	359.061	355.509	28.7398	NE	0.000364617	0.000455771	0.000546925
667	Intact	T	11	92.3738	29.3024	123598	1686.48	826.393	548.241	Tongue-shaped	4996	5213	217	5091.76	4.81983	33.6776	28.8578	21.8196	184.708	316.469	131.761	236.799	SW	0.00146448	0.0018306	0.00219673
668	Intact	D	12	92.3739	29.2956	65548.5	1306.36	196.341	531.921	Lobate-shaped	5177	5347	170	5241.65	4.71934	45.5711	40.8517	24.3661	0.784824	358.603	357.818	302.646	NW	0.000684144	0.000855181	0.00102622
669	Intact	T	10	92.3746	29.2996	95430.6	1427.59	454.918	224.932	Tongue-shaped	5082	5272	190	5179.28	4.56438	33.2554	28.691	22.6917	0	358.452	358.452	288.155	W	0.00107374	0.00134217	0.0016106
670	Intact	T	10	92.3751	29.3154	74244.6	1133.51	195.296	381.917	Lobate-shaped	4957	5028	71	4989.4	5.80952	34.2456	28.4361	17.3327	0	359.215	359.215	69.6254	E	0.000794457	0.000993071	0.00119169
671	Intact	T	13	92.3786	29.3131	104086	1845.7	778.214	167.205	Tongue-shaped	4996	5257	261	5103.26	3.57575	37.6751	34.0993	20.2739	0	357.797	357.797	53.3904	NE	0.00119164	0.00148955	0.00178746
672	Intact	D	11	92.3799	29.3001	89037.4	1288.54	266.898	436.611	Lobate-shaped	5220	5357	137	5278.64	6.82641	38.9051	32.0787	20.0375	221.634	344.219	122.586	286.137	W	0.000988005	0.00123501	0.00148201
673	Intact	T	13	92.3814	29.3181	44470	886.592	235.839	264.139	Lobate-shaped	4991	5089	98	5031.39	6.81771	40.701	33.8832	22.3436	231.394	282.995	51.6002	257.155	W	0.00042949	0.000536862	0.000644234
674	Intact	T	10	92.3818	29.7703	14563.9	558.248	78.5616	218.334	Lobate-shaped	4938	4970	32	4950.79	7.35284	31.4705	24.1176	19.259	5.71059	356.186	350.475	111.665	E	0.000112514	0.000140642	0.00016877
675	Relict	T	11	92.3824	29.8489	22401.4	718.479	157.128	120.485	Tongue-shaped	4980	5069	89	5019.78	14.4481	30.3845	15.9363	19.5988	266.73	338.385	71.6557	305.634	NW
676	Intact	T	9	92.383	29.3197	63782.1	1161.58	194.519	448.327	Lobate-shaped	5003	5109	106	5043.61	2.19835	34.735	32.5367	16.4717	0	358.727	358.727	290.261	W	0.000662081	0.000827602	0.000993122
677	Intact	T	10	92.3835	29.7702	17584.6	560.319	191.272	144.922	Tongue-shaped	4938	5034	96	4961.83	11.2448	41.6814	30.4366	24.2053	7.12502	357.797	350.672	129.494	SE	0.000141069	0.000176336	0.000211603
678	Relict	T	14	92.3858	29.3806	1.0988e+06	4578.52	1001.51	1309.51	Lobate-shaped	4168	4670	502	4392.04	4.5248	42.2726	37.7478	22.7126	0	359.51	359.51	299.37	NW
679	Intact	T	10	92.3858	29.7691	14648.6	614.232	193.053	89.4706	Tongue-shaped	4957	5069	112	4996.12	9.36304	44.9446	35.5815	28.1182	9.68879	52.1805	42.4917	38.8327	NE	0.0001133	0.000141625	0.00016995
680	Intact	T	9	92.3868	29.3182	166040	1752.61	333.854	485.91	Lobate-shaped	5029	5229	200	5100.59	3.14593	44.5155	41.3696	23.4248	0.369644	357.99	357.621	68.8877	E	0.00208703	0.00260878	0.00313054
681	Relict	T	11	92.3882	29.8429	37978.4	918.809	305.737	122.619	Tongue-shaped	5060	5199	139	5115.29	5.15586	41.7605	36.6046	26.9612	0.674036	359.444	358.77	147.116	SE
682	Relict	D	11	92.3888	29.8268	20418.6	598.863	236.49	69.8897	Tongue-shaped	5107	5242	135	5178	18.2886	41.1875	22.8988	29.7151	9.81126	67.8337	58.0224	36.3709	NE
683	Relict	D	12	92.389	29.3693	234011	2760.9	1076.96	470.361	Tongue-shaped	4826	5144	318	4960.75	2.02692	40.9901	38.9632	18.7123	0	358.727	358.727	247.054	SW
684	Intact	T	9	92.3905	29.3163	232728	2266.13	384.82	855.52	Lobate-shaped	5050	5377	327	5170.04	2.53008	57.4038	54.8737	28.7893	0	359.745	359.745	100.667	E	0.00312961	0.00391201	0.00469442
685	Relict	T	11	92.3913	29.7527	20165.1	816.547	305.898	137.635	Tongue-shaped	4906	5087	181	4963.35	12.149	47.1679	35.0189	29.5008	0.763898	357.035	356.271	131.655	SE
686	Relict	D	12	92.3921	29.8273	98344.2	1548.36	415.944	224.71	Tongue-shaped	5011	5194	183	5085.23	8.06484	42.8566	34.7918	20.1292	0	359.594	359.594	77.8027	E
687	Intact	T	11	92.3924	29.3301	419939	3192.95	402.187	1159.73	Lobate-shaped	5008	5375	367	5152.86	1.73826	54.7653	53.027	24.1849	0	359.706	359.706	177.327	S	0.00635471	0.00794339	0.00953206
688	Relict	T	13	92.3928	29.7674	10631.7	472.484	82.6582	181.75	Lobate-shaped	5020	5084	64	5054.67	24.0634	34.4823	10.4188	30.1008	13.9027	59.8586	45.9559	42.0776	NE
689	Intact	D	13	92.393	29.3174	200295	2287.51	925.151	277.16	Tongue-shaped	5015	5287	272	5123.3	1.09958	48.9873	47.8878	15.6066	0	359.493	359.493	248.032	W	0.00261382	0.00326727	0.00392073
690	Relict	D	14	92.3953	29.8268	121301	2073.77	675.001	270.227	Tongue-shaped	4997	5263	266	5087.1	1.43355	47.7553	46.3217	19.3809	0.616059	358.755	358.139	123.16	SE
691	Intact	T	11	92.3957	29.361	23692.6	608.418	173.835	146.705	Tongue-shaped	5233	5303	70	5266.86	10.5251	39.8051	29.2801	25.7569	0	358.191	358.191	78.7764	E	0.000201747	0.000252184	0.00030262
692	Relict	T	12	92.3962	29.3815	32340.6	809.732	324.353	132.887	Tongue-shaped	4514	4654	140	4575.97	9.86572	37.4109	27.5452	24.1716	2.07003	359.549	357.479	102.757	E
693	Intact	T	14	92.3963	29.3362	228056	2725.61	968.886	372.297	Tongue-shaped	5030	5437	407	5169.29	1.55485	54.9403	53.3855	20.9484	4.3987	342.597	338.199	283.855	W	0.00305437	0.00381796	0.00458155
694	Intact	T	13	92.3967	29.2931	158894	2697.08	1212.26	216.701	Tongue-shaped	4672	5243	571	4944.19	9.64512	49.3006	39.6555	28.1837	202.249	309.54	107.291	249.419	W	0.00197971	0.00247464	0.00296957
695	Intact	T	11	92.3969	29.3606	13770.8	505.804	185.574	88.279	Tongue-shaped	5249	5297	48	5275.13	17.6648	29.3523	11.6876	24.431	300.018	336.038	36.0191	315.465	NW	0.000105202	0.000131502	0.000157802
696	Relict	T	12	92.3974	29.3857	168312	1814.19	707.249	284.34	Tongue-shaped	4285	4512	227	4394.48	4.39024	31.6885	27.2983	19.2764	0	359.061	359.061	244.401	SW
697	Relict	T	10	92.3985	29.3804	68686.4	1502.94	643.884	143.104	Tongue-shaped	4550	4802	252	4679.95	12.2377	33.7913	21.5536	23.3061	1.36393	359.519	358.155	214.358	SW
698	Intact	T	10	92.3988	29.3507	20227.7	894.024	64.6007	369.503	Lobate-shaped	5311	5395	84	5338.77	1.43355	33.7564	32.3228	16.0653	26.5651	341.565	315	259.665	W	0.000166881	0.000208602	0.000250322
699	Intact	T	11	92.3989	29.3673	18995.2	606.698	237.624	107.229	Tongue-shaped	4999	5093	94	5025.68	6.19664	52.2656	46.069	24.2801	243.048	317.045	73.9976	266.731	W	0.000154755	0.000193443	0.000232132
700	Intact	T	12	92.3992	29.3405	56824	1103.65	448.722	136.153	Tongue-shaped	5240	5351	111	5296.86	0.777566	45.8183	45.0408	19.4222	84.8056	324.866	240.06	171.236	S	0.000576383	0.000720479	0.000864574
701	Intact	T	11	92.3996	29.3508	47293.5	1456.85	97.0371	679.202	Lobate-shaped	5284	5445	161	5343.96	4.18015	34.8539	30.6737	18.9452	3.46823	340.346	336.878	255.803	W	0.000462417	0.000578022	0.000693626
702	Relict	T	11	92.3998	29.7755	7106.08	409.704	55.0088	170.174	Lobate-shaped	4908	4924	16	4913	5.73719	25.8731	20.1359	16.1169	7.76517	359.493	351.728	71.9546	E
703	Relict	T	10	92.4002	29.8408	10484.2	440.705	103.382	90.1844	Tongue-shaped	4950	4982	32	4962.08	5.73719	20.9452	15.208	14.5625	281.976	345.651	63.6745	302.955	NW
704	Intact	T	12	92.4004	29.8378	26016.6	1249.75	72.4161	576.355	Lobate-shaped	4974	5013	39	4992.39	3.47333	27.4297	23.9564	16.5691	231.009	335.821	104.812	284.217	W	0.000225722	0.000282152	0.000338583
705	Relict	T	10	92.4014	29.7754	9946.63	524.155	210.659	80.3432	Tongue-shaped	4900	5008	108	4929.64	17.0244	39.9302	22.9058	28.5899	1.49433	357.368	355.873	43.5052	NE
706	Intact	T	11	92.4019	29.3007	173358	3009.33	186.357	1299.26	Lobate-shaped	5042	5449	407	5240.4	4.5248	52.6451	48.1203	29.0816	203.199	290.624	87.4249	249.988	W	0.00219789	0.00274737	0.00329684
707	Intact	T	11	92.4022	29.3405	33356	1000.19	304.07	161.873	Tongue-shaped	5292	5408	116	5334.69	2.80149	34.9404	32.1389	21.3874	5.71059	354.806	349.095	297.79	NW	0.000304146	0.000380182	0.000456219
708	Relict	T	11	92.4023	29.771	13360.3	748.12	53.4701	337.643	Lobate-shaped	5011	5080	69	5043.44	8.46334	40.2232	31.7599	28.5828	21.541	116.288	94.7473	78.5466	E
709	Relict	T	12	92.4035	29.7752	26254.9	722.477	273.837	114.443	Tongue-shaped	4826	4967	141	4876.84	8.81635	45.2822	36.4659	24.1528	21.0375	104.421	83.3833	49.0222	NE
710	Intact	T	13	92.4036	29.3433	65646.2	1350.69	221.05	521.9	Lobate-shaped	5308	5477	169	5363.45	4.96668	55.253	50.2863	26.9898	129.428	252.255	122.828	183.689	S	0.000685368	0.00085671	0.00102805
711	Relict	T	13	92.4043	29.7513	107931	1949.32	202.531	729.387	Lobate-shaped	4776	4915	139	4833.21	5.2819	47.514	42.2321	26.5088	5.59934	78.4078	72.8085	40.9632	NE
712	Intact	T	10	92.4049	29.3532	50624.8	947.537	329.904	201.175	Tongue-shaped	5227	5347	120	5265.41	4.19449	46.4667	42.2722	16.5877	12.3808	339.444	327.063	47.9756	NE	0.000501774	0.000627218	0.000752662
713	Intact	D	12	92.4073	29.3607	100099	1752.65	785.708	130.824	Tongue-shaped	5179	5322	143	5243.49	2.11438	32.5083	30.3939	15.662	2.1211	358.854	356.733	203.385	SW	0.00113707	0.00142134	0.00170561
714	Intact	D	11	92.4079	29.3503	119374	1466.53	522.347	265.948	Tongue-shaped	5278	5485	207	5367.47	1.25366	37.3804	36.1268	21.9286	0.629598	340.346	339.717	279.635	W	0.00140464	0.0017558	0.00210696
715	Intact	T	10	92.4127	29.3701	50887.6	943.616	237.435	246.117	Lobate-shaped	4779	4864	85	4816.28	8.09399	44.6675	36.5735	21.4595	41.236	104.859	63.6226	73.9069	E	0.000504901	0.000631127	0.000757352
716	Relict	T	12	92.4128	29.8073	125649	1781.62	738.028	156.051	Tongue-shaped	5003	5241	238	5096.88	0.695485	47.9454	47.2499	17.7442	1.7357	359.091	357.355	63.9458	NE
717	Intact	T	10	92.4131	29.3679	23069.5	645.956	243.104	119.084	Tongue-shaped	4805	4943	138	4849.77	13.4685	49.7009	36.2324	28.3159	34.6952	67.0362	32.3411	50.7623	NE	0.000195397	0.000244247	0.000293096
718	Relict	T	10	92.4146	29.8078	18454.1	702.707	284.598	68.7138	Tongue-shaped	5003	5051	48	5027.1	2.43285	25.9171	23.4843	12.3693	9.78241	118.301	108.518	41.5298	NE
719	Intact	T	10	92.4146	29.3653	28067.6	669.281	210.881	144.527	Tongue-shaped	4812	4917	105	4859.45	16.5368	37.4396	20.9028	25.7746	9.09028	357.663	348.572	62.4427	NE	0.00024724	0.00030905	0.00037086
720	Intact	T	10	92.4147	29.3666	21504.5	581.765	185.218	117.215	Tongue-shaped	4799	4846	47	4823.12	7.95452	26.2424	18.2879	16.9173	1.54816	93.9647	92.4165	48.0136	NE	0.000179601	0.000224501	0.000269401
721	Intact	T	10	92.4154	29.3769	76268.3	1617.8	686.422	228.05	Tongue-shaped	4720	5145	425	4894.65	14.4443	54.0953	39.651	33.7452	270.955	335.924	64.9697	290.004	W	0.000820513	0.00102564	0.00123077
722	Intact	D	11	92.4155	29.3462	44004.4	786.544	266.427	202.996	Tongue-shaped	5309	5434	125	5362.41	11.0593	49.9354	38.8761	29.1417	0	359.538	359.538	241.013	SW	0.000424099	0.000530124	0.000636149
723	Relict	T	12	92.4156	29.7109	44631.5	842.387	273.63	241.078	Tongue-shaped	5118	5265	147	5199.12	7.61348	37.1263	29.5128	26.8079	4.61635	353.884	349.268	77.2375	E
724	Intact	T	10	92.4159	29.3704	47517.2	1029.68	201.615	219.783	Lobate-shaped	4768	4885	117	4813.11	10.7905	45.9985	35.208	28.429	236.041	306.254	70.2129	268.98	W	0.000465044	0.000581305	0.000697566
725	Intact	T	10	92.416	29.3646	12063.7	489.77	150.836	61.1568	Tongue-shaped	4790	4848	58	4826.13	7.42487	32.023	24.5982	20.8328	12.0306	80.5377	68.5071	43.4878	NE	8.97531e-05	0.000112191	0.00013463
726	Intact	T	10	92.4166	29.3682	57040.9	1011.54	281.964	213.822	Tongue-shaped	4775	4907	132	4832.62	7.88007	38.0223	30.1422	24.7423	218.541	284.184	65.6431	248.179	W	0.000579024	0.00072378	0.000868536
727	Intact	T	10	92.4167	29.3637	39220.9	864.181	276.793	108.211	Tongue-shaped	4798	4906	108	4853.41	7.46458	44.6902	37.2256	20.608	26.2413	100.713	74.4718	55.1458	NE	0.000369397	0.000461746	0.000554095
728	Intact	T	10	92.4174	29.3658	14872.4	602.03	74.6989	181.806	Lobate-shaped	4784	4815	31	4796.71	3.88212	30.7841	26.902	16.0248	233.791	315	81.2095	255.708	W	0.00011538	0.000144225	0.00017307
729	Relict	T	10	92.4175	29.8079	37383.7	873.322	197.994	182.504	Tongue-shaped	4998	5084	86	5029.79	2.11438	40.6303	38.5159	19.4186	1.39718	355.515	354.118	201.88	S
730	Relict	T	11	92.418	29.8186	86324	1399.54	241.21	477.122	Lobate-shaped	4995	5071	76	5037.91	9.65115	43.3702	33.7191	17.9137	0	358.831	358.831	275.99	W
731	Intact	T	10	92.4182	29.3647	10317.4	381.216	104.95	112.609	Lobate-shaped	4789	4818	29	4804.92	7.26378	21.1743	13.9105	15.143	260.218	344.197	83.9799	291.611	W	7.43974e-05	9.29967e-05	0.000111596
732	Relict	T	10	92.419	29.809	7983.13	336.497	101.864	92.0596	Tongue-shaped	4988	5043	55	5005.2	6.89557	47.9944	41.0989	27.0747	297.474	347.735	50.2608	330.235	NW
733	Intact	T	11	92.4195	29.3632	110395	1342.75	342.436	339.412	Tongue-shaped	4815	4946	131	4876.97	6.19664	36.2783	30.0816	21.303	227.526	333.435	105.909	252.341	W	0.00127883	0.00159854	0.00191825
734	Intact	T	12	92.4213	29.3564	113965	1791.31	636.052	311.112	Tongue-shaped	4898	5151	253	4974.66	1.55485	45.5305	43.9756	19.3267	4.3987	353.991	349.592	82.8502	E	0.00132861	0.00166076	0.00199291
735	Intact	D	12	92.4218	29.3513	317199	2746.1	1184.8	359.049	Tongue-shaped	4909	5293	384	5102.17	0.695485	45.0837	44.3883	21.4468	0	359.474	359.474	64.8929	NE	0.00453806	0.00567257	0.00680709
736	Intact	T	10	92.4222	29.3603	57390.4	1142.08	442.673	204.498	Tongue-shaped	4862	4992	130	4925.83	6.81771	34.1671	27.3493	21.6336	220.236	291.038	70.8011	255.604	W	0.000583283	0.000729104	0.000874924
737	Intact	T	13	92.4225	29.3819	99289.6	1733.73	740.5	117.651	Tongue-shaped	4833	5098	265	4981.04	1.73826	39.87	38.1318	20.5126	0	359.204	359.204	271.894	W	0.00112605	0.00140756	0.00168907
738	Relict	T	11	92.4226	29.8074	40885.5	1053.34	119.501	394.05	Lobate-shaped	5012	5090	78	5040.34	1.25366	42.4055	41.1518	26.2315	24.5998	171.87	147.27	46.0499	NE
739	Intact	D	11	92.4232	29.3474	387712	2775.55	1159.32	426.332	Tongue-shaped	4993	5248	255	5151.97	1.25366	37.9358	36.6821	16.5141	0.73452	356.186	355.451	93.0056	E	0.00577409	0.00721761	0.00866113
740	Relict	T	11	92.4239	29.7186	18527.6	547.271	115.337	219.619	Lobate-shaped	4939	4975	36	4953.22	8.46334	26.4597	17.9963	18.9368	2.81556	354.226	351.41	295.043	NW
741	Relict	T	10	92.4247	29.8069	23096.4	581.23	164.067	159.119	Tongue-shaped	4997	5033	36	5016.23	4.19449	20.439	16.2445	11.7701	2.1211	358.264	356.143	146.372	SE
742	Relict	T	12	92.4251	29.7224	15108.6	493.178	112.083	146.408	Lobate-shaped	4888	4942	54	4917.21	12.2377	37.2754	25.0377	24.6652	267.089	332.928	65.8387	284.973	W
743	Intact	T	10	92.4265	29.3688	12856.5	538.434	225.35	74.5767	Tongue-shaped	5307	5424	117	5353.33	7.58239	37.167	29.5847	29.8625	234.846	268.152	33.3066	243.125	SW	9.68771e-05	0.000121096	0.000145316
744	Intact	T	10	92.4273	29.3545	80597.1	1290.78	232.424	526.75	Lobate-shaped	4933	5103	170	5022.67	11.8063	46.4648	34.6585	26.8232	199.179	283.309	84.1302	250.744	W	0.00087671	0.00109589	0.00131506
745	Intact	T	9	92.4275	29.34	62371.7	1046.84	371.081	183.545	Tongue-shaped	5257	5346	89	5300.48	0.777566	43.8973	43.1197	16.4813	0	358.831	358.831	222.443	SW	0.000644552	0.00080569	0.000966827
746	Relict	T	12	92.4282	29.7809	66431.7	1213.13	162.471	445.883	Lobate-shaped	4910	4957	47	4928.27	0.347755	26.3505	26.0028	14.6339	0	353.108	353.108	306.207	NW
747	Intact	T	10	92.4296	29.364	30599.5	697.037	199.786	207.024	Lobate-shaped	5346	5458	112	5392.91	9.69927	44.2911	34.5918	27.7056	225.674	306.027	80.3533	257.234	W	0.000274239	0.000342799	0.000411358
748	Intact	T	11	92.4303	29.376	44522	859.227	214.465	225.402	Lobate-shaped	5272	5428	156	5341.62	25.0511	44.255	19.2039	32.7073	0.757168	357.022	356.265	211.724	SW	0.000430093	0.000537616	0.000645139
749	Relict	T	10	92.431	29.8056	25246.5	631.567	210.814	178.224	Tongue-shaped	4984	5080	96	5022.73	15.1319	37.1935	22.0616	24.6346	4.82077	359.091	354.27	41.6444	NE
750	Intact	D	11	92.4313	29.3474	172451	2506.61	1071.6	233.34	Tongue-shaped	5037	5329	292	5195.55	3.2955	38.8305	35.535	19.2982	178.152	319.899	141.747	268.989	W	0.0021841	0.00273013	0.00327615
751	Intact	T	11	92.4326	29.3357	17581.8	511.97	111.407	195.154	Lobate-shaped	5358	5437	79	5401.9	23.5183	41.5626	18.0443	29.4336	205.074	243.435	38.3605	217.607	SW	0.000141042	0.000176303	0.000211563
752	Intact	T	11	92.4328	29.374	42812.3	985.631	404.215	134.802	Tongue-shaped	5334	5549	215	5426.45	16.1793	46.1919	30.0127	29.7851	46.8779	126.104	79.2263	77.3661	E	0.00041035	0.000512937	0.000615525
753	Relict	T	14	92.4335	29.4829	54921.7	1338.03	298.014	120.883	Tongue-shaped	4963	5049	86	5009.48	4.65541	27.4585	22.8031	13.2816	0	358.603	358.603	250.741	W
754	Relict	T	13	92.4343	29.4451	67945.9	995.325	257.263	263.001	Lobate-shaped	5008	5094	86	5048.95	4.81983	34.4268	29.607	17.3272	0	359.256	359.256	131.951	SE
755	Intact	T	11	92.4346	29.3289	14697.6	487.628	160.264	99.3244	Tongue-shaped	5205	5298	93	5244.35	5.90118	47.2469	41.3457	28.5785	171.254	292.913	121.659	253.518	W	0.000113754	0.000142193	0.000170632
756	Relict	T	12	92.4355	29.4536	349044	3350.35	247.896	1494.82	Lobate-shaped	4906	5109	203	5021.13	0.347755	33.5178	33.17	11.575	0	359.534	359.534	272.935	W
757	Intact	T	10	92.4358	29.3489	89966.1	1372.75	200.391	506.099	Lobate-shaped	5245	5439	194	5319.24	0.777566	47.2185	46.4409	25.6994	0.784824	358.781	357.996	195.163	S	0.00100038	0.00125048	0.00150058
758	Intact	T	12	92.4362	29.3608	208628	1833.27	529.37	497.382	Tongue-shaped	5291	5502	211	5360.32	1.73826	47.4968	45.7585	21.5346	1.97493	357.709	355.734	198.906	S	0.00274485	0.00343106	0.00411727
759	Relict	T	10	92.4368	29.7389	7703.38	456.632	186.84	63.4519	Tongue-shaped	4724	4808	84	4750.11	10.1213	41.2774	31.156	27.3707	321.072	354.012	32.9394	341.141	N
760	Relict	T	10	92.4369	29.4715	63470.2	1240.11	173.085	417.998	Lobate-shaped	4997	5080	83	5030.35	4.34904	27.4633	23.1143	15.8058	0	359.384	359.384	208.697	SW
761	Relict	D	12	92.4371	29.7376	75247.5	1862.84	758.779	86.3569	Tongue-shaped	4718	5152	434	4964.49	9.28166	50.3536	41.072	31.6036	0.590656	358.85	358.259	75.0629	E
762	Intact	T	12	92.4373	29.3206	48592.8	934.622	240.806	243.305	Lobate-shaped	5005	5098	93	5041.87	7.13218	41.6237	34.4916	21.1113	216.158	353.234	137.076	270.292	W	0.000477705	0.000597131	0.000716557
763	Intact	T	12	92.4377	29.3696	46958.2	933.688	380.242	142.819	Tongue-shaped	5242	5300	58	5273.88	4.23721	31.2876	27.0504	14.0032	1.4688	358.025	356.556	166.828	S	0.000458486	0.000573108	0.000687729
764	Relict	T	13	92.4378	29.7782	29037.2	1091.94	93.6837	477.689	Lobate-shaped	5006	5129	123	5069.83	11.7821	35.2141	23.4321	23.3934	0	358.977	358.977	269.492	W
765	Relict	T	10	92.4378	29.8086	14375.7	517.369	94.519	200.039	Lobate-shaped	5013	5064	51	5041.5	20.3392	38.6141	18.2749	30.0701	1.84761	359.605	357.757	308.052	NW
766	Intact	T	13	92.4383	29.3131	415887	4023.87	1633.58	344.7	Tongue-shaped	4856	5205	349	5019.02	2.45752	38.2394	35.7819	15.757	0	347.619	347.619	251.286	W	0.0062812	0.0078515	0.0094218
767	Relict	T	11	92.4393	29.7957	28037.7	751.412	90.8826	322.585	Lobate-shaped	5079	5144	65	5124.7	3.27718	34.2244	30.9473	18.9019	2.3533	359.145	356.792	279.497	W
768	Intact	T	10	92.4398	29.5821	89261	1570.91	139.975	649.568	Lobate-shaped	5050	5126	76	5088.44	2.11438	28.8486	26.7342	15.1191	0	358.877	358.877	101.439	E	0.000990984	0.00123873	0.00148648
769	Intact	T	10	92.4404	29.4708	19455.2	581.709	210.928	109.456	Tongue-shaped	5035	5102	67	5062.65	8.40064	26.2923	17.8916	15.9968	5.63068	359.215	353.584	273.74	W	0.000159264	0.000199079	0.000238895
770	Intact	T	10	92.4408	29.4692	15531	610.033	267.753	64.6009	Tongue-shaped	5086	5248	162	5153.5	17.0244	43.5777	26.5533	30.2714	0	358.285	358.285	279.085	W	0.000121538	0.000151923	0.000182307
771	Intact	T	11	92.4415	29.5759	46594.1	1108.68	201.859	468.886	Lobate-shaped	5123	5220	97	5157.85	2.33155	25.3995	23.0679	16.4238	0	356.987	356.987	244.053	SW	0.000454223	0.000567779	0.000681335
772	Intact	T	13	92.4418	29.5272	171280	1982.24	312.751	731.131	Lobate-shaped	5011	5136	125	5072.39	0.983516	38.293	37.3095	14.0667	0	359.605	359.605	195.171	S	0.00216631	0.00270789	0.00324946
773	Relict	T	9	92.4423	29.4315	16900	562.291	91.0232	220.034	Lobate-shaped	5117	5217	100	5172.21	15.0443	38.5697	23.5254	28.5336	279.389	328.643	49.2538	307.35	NW
774	Relict	T	11	92.4424	29.7677	20706	528.399	163.712	143.681	Tongue-shaped	4922	4997	75	4955.46	9.3755	42.5597	33.1842	24.9897	242.103	312.241	70.1382	285.297	W
775	Intact	T	10	92.4426	29.2798	77161.8	1408.66	608.561	152.239	Tongue-shaped	4687	5004	317	4849.58	15.8222	43.4737	27.6515	28.262	257.811	354.806	96.9942	313.75	NW	0.000832061	0.00104008	0.00124809
776	Relict	T	11	92.4428	29.8087	11210.2	458.028	181.386	67.3401	Tongue-shaped	5068	5170	102	5109.67	19.3751	45.2781	25.903	32.8201	309.719	338.499	28.7798	324.409	NW
777	Relict	T	10	92.4429	29.4829	57594.8	1040.23	239.056	271.751	Lobate-shaped	5062	5139	77	5097.35	3.42096	31.8744	28.4534	17.5993	1.84761	359.061	357.213	293.503	NW
778	Intact	T	10	92.4431	29.4704	72324.9	1105.84	240.632	354.259	Lobate-shaped	5061	5121	60	5086.99	3.2955	25.6746	22.3791	13.9985	0.971021	359.31	358.339	230.127	SW	0.000769871	0.000962338	0.00115481
779	Intact	T	13	92.4431	29.4273	96046	1715.15	628.026	176.723	Tongue-shaped	5060	5381	321	5201.94	8.01356	50.5276	42.5141	25.2271	173.991	314.119	140.128	252.002	W	0.00108205	0.00135256	0.00162308
780	Relict	T	10	92.4432	29.7696	10463.2	433.234	114.335	91.8459	Tongue-shaped	4929	4955	26	4940	3.57575	24.0575	20.4817	13.6632	227.603	308.48	80.8776	283.73	W
781	Intact	D	12	92.4441	29.3337	73035.7	1163.88	442.992	155.055	Tongue-shaped	5269	5358	89	5316.29	3.27718	30.2284	26.9512	13.6179	49.9697	257.619	207.649	179.33	S	0.00077896	0.0009737	0.00116844
782	Intact	T	12	92.4442	29.2968	119932	1724.05	163.272	720.773	Lobate-shaped	4943	5272	329	5134.49	9.40656	47.0681	37.6615	27.991	0	359.687	359.687	268.811	W	0.00141252	0.00176565	0.00211879
783	Intact	T	10	92.4446	29.5979	63250.2	1027.34	182.348	338.695	Lobate-shaped	5097	5149	52	5125.33	3.20284	28.9716	25.7688	13.1086	0	358.877	358.877	82.1303	E	0.00065546	0.000819325	0.000983191
784	Intact	T	10	92.4452	29.3576	51257.4	879.386	259.491	182.239	Tongue-shaped	5156	5284	128	5215.89	15.5611	37.2226	21.6616	25.2397	0.784824	358.264	357.479	205.64	SW	0.000509308	0.000636635	0.000763963
785	Intact	T	10	92.4453	29.4332	36242.8	829.761	209.746	92.1141	Tongue-shaped	5255	5330	75	5289.73	4.51153	36.6158	32.1042	19.5216	194.036	274.236	80.2001	247.864	W	0.000336	0.00042	0.000504
786	Intact	T	10	92.4456	29.4415	21101.3	665.764	227.82	95.8437	Tongue-shaped	5220	5259	39	5233.96	3.2955	32.3723	29.0768	14.5533	10.008	344.055	334.047	220.227	SW	0.000175567	0.000219459	0.000263351
787	Relict	T	12	92.446	29.5006	62122.9	1249.75	230.272	413.863	Lobate-shaped	5112	5191	79	5160.19	5.54676	26.1872	20.6404	18.5262	0	359.397	359.397	239.874	SW
788	Relict	T	11	92.4464	29.7717	19706.2	644.86	165.189	145.854	Tongue-shaped	4932	5003	71	4961.65	11.2601	36.6304	25.3703	25.2619	299.995	355.426	55.431	322.957	NW
789	Intact	T	10	92.4468	29.5448	9499.48	501.58	51.7723	223.11	Lobate-shaped	5198	5241	43	5217.31	4.18015	23.8332	19.653	15.1653	252.553	331.504	78.9516	302.073	NW	6.73771e-05	8.42214e-05	0.000101066
790	Intact	D	11	92.4472	29.5789	109051	1425.71	414.967	284.348	Tongue-shaped	5108	5190	82	5145.7	0.347755	29.2092	28.8614	11.9896	1.63658	359.091	357.454	235.356	SW	0.00126017	0.00157521	0.00189025
791	Intact	D	11	92.4475	29.3649	310275	2929.65	1217.78	317.468	Tongue-shaped	4899	5303	404	5066.48	0.983516	46.6369	45.6534	20.2737	0	355.365	355.365	67.2245	NE	0.00441946	0.00552432	0.00662919
792	Relict	T	10	92.4476	29.7962	8264.47	399.739	165.382	58.865	Tongue-shaped	5113	5153	40	5130.67	7.95452	24.9619	17.0074	18.0865	4.21418	356.987	352.773	123.178	SE
793	Intact	T	10	92.4478	29.4702	99884	1528.28	308.615	371.498	Lobate-shaped	5089	5227	138	5136.16	2.50613	43.1717	40.6656	17.0799	0	359.409	359.409	278.08	W	0.00113414	0.00141768	0.00170121
794	Relict	T	10	92.4481	29.4581	21140.6	628.029	157.922	108.031	Tongue-shaped	5151	5213	62	5181.65	9.60883	21.8963	12.2874	17.47	222.955	269.326	46.3714	255.977	W
795	Intact	T	11	92.4484	29.3125	51465.1	1239.35	112.871	482.717	Lobate-shaped	5195	5340	145	5259.52	9.0522	36.1902	27.138	23.6269	130.855	225.716	94.8608	188.133	S	0.000511786	0.000639732	0.000767678
796	Intact	T	11	92.4485	29.2964	60513.1	1033.68	278.718	233.888	Tongue-shaped	5184	5293	109	5242.2	5.21354	41.4817	36.2682	20.9918	0.556251	359.549	358.993	303.796	NW	0.000621573	0.000776966	0.00093236
797	Relict	T	12	92.4487	29.4516	185901	2012.51	679.833	469.835	Tongue-shaped	5112	5262	150	5192.86	1.25366	39.4811	38.2275	12.8912	0	354.019	354.019	280.702	W
798	Intact	T	10	92.449	29.3194	21042.5	641.937	223.865	118.854	Tongue-shaped	5198	5339	141	5254.92	13.5018	43.2618	29.76	32.1066	298.652	335.726	37.0737	315.94	NW	0.000174981	0.000218726	0.000262471
799	Intact	D	12	92.4491	29.3218	132878	1613.96	510.339	454.769	Tongue-shaped	5147	5309	162	5196.82	0.347755	55.1424	54.7946	15.5283	0	350.538	350.538	275.355	W	0.0015974	0.00199676	0.00239611
800	Intact	T	12	92.4498	29.5522	23068.5	677.881	169.718	138.715	Tongue-shaped	5117	5187	70	5151.41	4.06359	29.3808	25.3172	22.5784	5.71059	346.293	340.582	309.89	NW	0.000195387	0.000244234	0.000293081
801	Relict	T	13	92.45	29.4369	67485	1098.98	383.859	188.512	Tongue-shaped	5188	5278	90	5243.73	0.491794	30.0885	29.5967	15.2748	2.1211	357.879	355.758	106.32	E
802	Relict	T	11	92.4501	29.5014	154015	1917.31	411.749	635.159	Lobate-shaped	5115	5237	122	5189.71	0.777566	27.2784	26.5009	12.996	0	359.433	359.433	225.77	SW
803	Intact	T	11	92.4501	29.5244	108043	1397.9	286.826	455.165	Lobate-shaped	5128	5196	68	5156.09	1.96645	28.7602	26.7937	12.4375	0	359.193	359.193	224.559	SW	0.0012462	0.00155775	0.0018693
804	Intact	T	10	92.4502	29.6202	25460	668.54	134.961	259.829	Lobate-shaped	5196	5224	28	5209.06	2.80149	31.2113	28.4098	13.0854	0	338.199	338.199	60.4613	NE	0.000219939	0.000274924	0.000329909
805	Intact	T	11	92.4503	29.5881	96842	1596.65	210.958	668.385	Lobate-shaped	5169	5263	94	5219.93	1.39077	22.3617	20.9709	11.7219	176.987	315	138.013	234.728	SW	0.00109282	0.00136603	0.00163923
806	Intact	T	11	92.4504	29.3027	113009	1643.99	611.344	246.451	Tongue-shaped	5208	5421	213	5305.67	10.1613	37.3795	27.2182	20.3587	214.939	323.915	108.976	271.746	W	0.00131524	0.00164405	0.00197287
807	Intact	T	11	92.4507	29.5787	27532.9	709.856	168.025	194.839	Lobate-shaped	5156	5210	54	5179.88	5.60032	25.8661	20.2658	14.2375	259.695	303.69	43.9949	275.307	W	0.000241599	0.000301999	0.000362399
808	Relict	T	12	92.451	29.4557	96267.8	1331.65	518.564	314.007	Tongue-shaped	5193	5347	154	5247.12	1.39077	38.1724	36.7816	14.5032	2.48955	356.424	353.934	271.558	W
809	Intact	T	12	92.4511	29.2836	47564.1	889.482	324.37	191.615	Tongue-shaped	4906	5061	155	4956.64	3.95876	45.5137	41.5549	24.7199	0.643745	359.293	358.649	255.216	W	0.000465594	0.000581993	0.000698391
810	Intact	D	11	92.4513	29.3269	63905.5	1162.02	340.459	175.235	Tongue-shaped	5225	5356	131	5273.45	10.5251	42.0271	31.5021	19.9798	227.862	315	87.1376	278.054	W	0.000663618	0.000829523	0.000995427
811	Intact	T	11	92.4513	29.2976	68661.7	1241.87	194.474	437.814	Lobate-shaped	5269	5449	180	5352.01	13.8094	42.5509	28.7415	31.9678	258.311	342.121	83.8107	303.141	NW	0.000723319	0.000904149	0.00108498
812	Relict	T	15	92.4514	29.4257	141154	1867.57	761.629	217.208	Tongue-shaped	5010	5188	178	5098.9	1.09958	37.7707	36.6711	15.4235	5.19443	349.509	344.314	90.8616	E
813	Intact	T	11	92.4517	29.7983	17569.5	499.21	157.986	125.679	Tongue-shaped	5025	5085	60	5048.79	12.1958	39.8305	27.6348	21.1483	1.84761	38.6598	36.8122	19.9742	N	0.000140924	0.000176155	0.000211386
814	Intact	T	11	92.4518	29.3649	19946.6	547.245	189.568	133.474	Tongue-shaped	4913	4983	70	4937.68	8.70935	33.8663	25.1569	21.8075	228.814	267.709	38.8953	251.391	W	0.000164103	0.000205129	0.000246154
815	Intact	D	12	92.4522	29.6085	28186.8	761.052	318.146	110.437	Tongue-shaped	5227	5266	39	5243.76	2.98883	19.0292	16.0404	11.289	163.369	317.291	153.922	238.155	SW	0.000248501	0.000310626	0.000372751
816	Intact	T	11	92.4522	29.5801	7344	375.26	132.383	64.0485	Tongue-shaped	5205	5251	46	5231.44	15.8222	31.077	15.2548	23.4943	244.872	271.736	26.8635	256.986	W	4.94756e-05	6.18446e-05	7.42135e-05
817	Intact	D	13	92.4525	29.576	253044	2806.68	1092.81	370.775	Tongue-shaped	5145	5340	195	5230.52	1.47509	33.2959	31.8208	12.264	0	359.356	359.356	250.641	W	0.00346025	0.00432531	0.00519038
818	Intact	D	13	92.4526	29.5929	119909	1758.88	237.391	507.611	Lobate-shaped	5185	5306	121	5235.7	2.80149	38.6633	35.8618	16.2252	1.80874	359.409	357.601	237.609	SW	0.0014122	0.00176525	0.0021183
819	Intact	T	9	92.4526	29.6052	25707	667.706	186.52	223.012	Lobate-shaped	5165	5227	62	5197.79	10.0754	25.5151	15.4398	17.7984	214.875	279.728	64.8522	250.023	W	0.000222502	0.000278128	0.000333754
820	Intact	T	13	92.4527	29.5492	240623	2505.33	936.841	309.059	Tongue-shaped	5105	5363	258	5192.06	0.347755	38.5397	38.192	14.5011	0	358.781	358.781	88.0013	E	0.00325744	0.0040718	0.00488616
821	Intact	T	10	92.453	29.4706	116083	1382.2	327.287	470.22	Lobate-shaped	5124	5222	98	5173.68	2.22563	37.3848	35.1591	13.9416	4.51399	358.531	354.017	310.397	NW	0.0013583	0.00169787	0.00203744
822	Intact	D	11	92.4531	29.3308	128538	1572.05	524.895	241.936	Tongue-shaped	5284	5511	227	5372.95	3.2955	54.0603	50.7648	24.3365	112.751	290.772	178.021	235.609	SW	0.00153501	0.00191877	0.00230252
823	Intact	D	12	92.4533	29.6429	80181.5	1524.61	657.373	142.041	Tongue-shaped	5055	5144	89	5104.62	1.43355	34.6846	33.251	12.3831	0	347.735	347.735	80.7094	E	0.000871288	0.00108911	0.00130693
824	Intact	T	11	92.4533	29.4811	130448	1449.72	306.483	512.316	Lobate-shaped	5132	5208	76	5168.29	3.20284	27.7909	24.5881	13.6124	0	358.025	358.025	203.15	SW	0.00156242	0.00195303	0.00234363
825	Relict	T	11	92.4538	29.7734	32356.6	1090.83	106.537	454.362	Lobate-shaped	4981	5040	59	5012	7.13218	30.47	23.3378	20.1245	258.071	322.765	64.6945	290.132	W
826	Intact	T	11	92.4538	29.3146	97103.6	1665.63	258.574	585.71	Lobate-shaped	5303	5479	176	5362.97	0.777566	40.934	40.1564	20.7952	0	344.745	344.745	164.447	S	0.00109636	0.00137046	0.00164455
827	Intact	D	11	92.4539	29.3288	38362.6	785.379	197.102	225.412	Lobate-shaped	5332	5458	126	5380.76	17.178	53.2491	36.0711	34.9192	242.865	309.644	66.7793	281.759	W	0.000359719	0.000449648	0.000539578
828	Intact	T	10	92.4539	29.2833	42076.6	892.861	296.154	126.799	Tongue-shaped	4908	5062	154	5005	4.86928	44.3839	39.5147	26.2592	0	355.764	355.764	311.431	NW	0.000401903	0.000502379	0.000602855
829	Intact	T	10	92.454	29.5445	37408.3	774.718	266.607	155.792	Tongue-shaped	5229	5291	62	5258.9	4.39024	28.1137	23.7235	16.7063	1.33222	356.76	355.428	299.793	NW	0.000349007	0.000436259	0.00052351
830	Intact	T	7	92.4541	29.6074	69540.4	988.251	285.21	277.454	Tongue-shaped	5245	5362	117	5312.94	1.43355	47.3579	45.9244	26.3008	4.3987	359.204	354.806	236.718	SW	0.000734441	0.000918052	0.00110166
831	Intact	T	11	92.4541	29.5823	26060.7	838.232	111.108	270.059	Lobate-shaped	5231	5265	34	5248.52	2.02692	32.0315	30.0046	15.0223	0	352.304	352.304	240.709	SW	0.000226181	0.000282726	0.000339271
832	Intact	T	10	92.4543	29.6165	80811.2	1328.18	353.868	264.273	Tongue-shaped	5229	5302	73	5271.76	0.777566	37.7255	36.948	14.3201	0	359.17	359.17	104.454	E	0.000879505	0.00109938	0.00131926
833	Relict	T	13	92.4545	29.4338	51347	992.731	338.281	181.367	Tongue-shaped	5078	5197	119	5125.38	5.42701	34.3354	28.9084	18.0739	67.0007	135	67.9993	103.972	E
834	Intact	D	12	92.4548	29.6332	18084.6	528.616	183.516	102.361	Tongue-shaped	5229	5291	62	5261.17	18.7057	27.2914	8.58568	22.4349	314.326	358.394	44.068	333.646	NW	0.000145896	0.00018237	0.000218844
835	Intact	T	12	92.4552	29.3728	137763	1851.76	775.129	282.137	Tongue-shaped	4715	5113	398	4836.54	7.88007	53.553	45.6729	26.8361	0	359.119	359.119	54.2086	NE	0.00166813	0.00208517	0.0025022
836	Intact	D	14	92.456	29.6147	64338.5	1287.05	494.614	180.153	Tongue-shaped	5270	5436	166	5326.37	1.25366	38.1956	36.9419	16.9423	0	359.433	359.433	237.05	SW	0.000669018	0.000836273	0.00100353
837	Intact	T	11	92.4564	29.2967	27747.6	740.56	296.371	78.8705	Tongue-shaped	5288	5366	78	5324.66	11.2907	37.1485	25.8578	21.822	141.563	267.581	126.018	196.412	S	0.000243862	0.000304827	0.000365792
838	Intact	T	11	92.4566	29.525	241975	2333.22	307.588	861.541	Lobate-shaped	5136	5243	107	5199.78	0.695485	31.5431	30.8476	12.6386	0	359.409	359.409	270.892	W	0.00327941	0.00409927	0.00491912
839	Intact	D	9	92.4567	29.6087	7927.86	387.949	71.8929	160.809	Lobate-shaped	5316	5327	11	5320.8	1.25366	11.8978	10.6441	6.74123	78.6901	338.199	259.509	238.724	SW	5.42325e-05	6.77906e-05	8.13487e-05
840	Intact	T	11	92.4569	29.457	73253.6	1292.75	135.374	499.657	Lobate-shaped	5289	5375	86	5327.08	3.57575	36.9803	33.4046	17.3654	163.61	355.986	192.375	304.865	NW	0.000781748	0.000977186	0.00117262
841	Intact	D	12	92.4571	29.5922	157493	1954.95	439.437	652.926	Lobate-shaped	5228	5366	138	5310.04	1.43355	38.0867	36.6531	13.7377	0	359.474	359.474	283.552	W	0.00195878	0.00244848	0.00293817
842	Intact	T	11	92.4573	29.5451	44892.6	826.02	270.15	213.542	Tongue-shaped	5205	5320	115	5255.95	8.90229	42.143	33.2407	24.3543	0.881403	357.93	357.049	336.692	NW	0.000434392	0.00054299	0.000651588
843	Relict	T	11	92.4575	29.4987	282117	2309.3	470.235	733.174	Lobate-shaped	5182	5271	89	5233.19	0	28.8589	28.8589	11.9201	-1	359.119	360.119	135.326	SE
844	Intact	D	15	92.4575	29.5991	263894	2715.62	1130.83	385.825	Tongue-shaped	5195	5509	314	5320.52	0.777566	39.1253	38.3477	17.0134	3.81407	355.101	351.287	259.148	W	0.00363905	0.00454881	0.00545857
845	Intact	D	12	92.4579	29.4704	128670	1773.4	576.133	213.545	Tongue-shaped	5156	5410	254	5246.11	5.05034	46.2036	41.1533	22.7883	0	359.764	359.764	105.571	E	0.00153689	0.00192112	0.00230534
846	Intact	T	10	92.458	29.6199	51015.5	1251.24	161.109	507.425	Lobate-shaped	5230	5343	113	5282.49	6.44143	28.3153	21.8739	17.9603	180.785	278.13	97.3453	241.172	SW	0.000506425	0.000633031	0.000759638
847	Relict	T	10	92.4581	29.4307	49739.6	995.678	324.2	139.917	Tongue-shaped	5011	5168	157	5073.18	5.00271	41.6184	36.6157	26.039	11.3099	291.675	280.365	249.901	W
848	Intact	T	11	92.4583	29.4801	109288	1480.56	250.858	558.306	Lobate-shaped	5169	5230	61	5198.9	1.09958	32.8129	31.7133	14.6409	0	359.275	359.275	161.814	S	0.00126345	0.00157932	0.00189518
849	Relict	T	10	92.4584	29.4334	43219.3	913.345	242.08	210.484	Tongue-shaped	5043	5133	90	5090.36	11.8208	33.7815	21.9607	21.6601	182.045	294.944	112.898	266.597	W
850	Intact	T	11	92.4585	29.5861	114914	1960.81	178.447	811.173	Lobate-shaped	5257	5360	103	5303.42	3.47333	42.9511	39.4777	15.1232	184.899	311.309	126.41	236.067	SW	0.00134191	0.00167738	0.00201286
851	Intact	T	11	92.4588	29.463	7785.2	340.844	84.51	91.7533	Lobate-shaped	5273	5306	33	5288.4	6.72127	23.0275	16.3063	16.6622	184.399	250.201	65.8024	218.72	SW	5.30635e-05	6.63294e-05	7.95953e-05
852	Intact	T	11	92.4588	29.4598	14180.2	473.546	143.926	103.061	Tongue-shaped	5277	5316	39	5296.53	4.81983	25.5529	20.7331	17.2219	2.23117	358.409	356.178	305.89	NW	0.000108966	0.000136208	0.000163449
853	Intact	D	9	92.4593	29.6089	25185.8	1021.63	208.583	361.609	Lobate-shaped	5344	5415	71	5372.9	4.81983	28.5265	23.7067	13.4971	190.491	291.297	100.806	247.418	SW	0.0002171	0.000271375	0.00032565
854	Relict	T	14	92.4594	29.7923	44491.6	933.907	172.213	292.792	Lobate-shaped	5036	5149	113	5078.65	13.2879	46.8551	33.5672	28.575	19.0935	78.2544	59.1609	44.0283	NE
855	Intact	D	12	92.4594	29.5808	164438	1890.77	449.72	551.081	Lobate-shaped	5288	5396	108	5338	0.491794	30.4993	30.0075	11.4226	0	359.275	359.275	259.979	W	0.00206289	0.00257861	0.00309434
856	Intact	T	11	92.4595	29.4521	72369	1301.72	288.27	240.53	Tongue-shaped	5236	5323	87	5284.06	1.25366	33.764	32.5104	15.1211	37.4054	258.69	221.285	154.39	SE	0.000770434	0.000963042	0.00115565
857	Intact	T	11	92.4595	29.2845	83266.2	1469.55	238.589	596.733	Lobate-shaped	5078	5304	226	5183.81	8.40763	44.7225	36.3149	27.611	277.716	345.872	68.1564	309.161	NW	0.000911665	0.00113958	0.0013675
858	Intact	T	10	92.4601	29.4598	14496.1	471.998	146.764	124.029	Tongue-shaped	5297	5332	35	5314.33	9.69927	21.7509	12.0516	13.6527	308.884	342.699	33.815	325.581	NW	0.000111885	0.000139856	0.000167828
859	Relict	T	13	92.4603	29.4738	94258.9	1347.74	267.056	292.314	Lobate-shaped	5159	5277	118	5216.22	4.85697	33.0151	28.1581	17.1764	207.897	315.796	107.898	257.341	W
860	Intact	T	13	92.4605	29.4407	301882	2872.34	400.315	1052.55	Lobate-shaped	5093	5283	190	5183.76	1.04316	34.7474	33.7042	13.8227	6.34019	331.798	325.458	242.075	SW	0.00427639	0.00534549	0.00641458
861	Relict	T	12	92.4606	29.3837	65440.4	1743	811.734	85.432	Tongue-shaped	4850	5137	287	4984.41	13.535	45.5183	31.9833	23.6773	6.25904	359.182	352.923	287.772	W
862	Intact	D	11	92.4607	29.6153	16921	547.809	218.458	105.793	Tongue-shaped	5308	5406	98	5359.1	1.73826	43.8059	42.0676	23.7601	0	355.086	355.086	304.332	NW	0.000134705	0.000168382	0.000202058
863	Intact	T	11	92.4608	29.4695	16575.7	539.685	130.011	145.962	Lobate-shaped	5213	5249	36	5230.26	6.19664	16.9105	10.7139	12.3334	283.241	350.838	67.5971	313.965	NW	0.000131414	0.000164267	0.00019712
864	Intact	T	11	92.461	29.459	30664.4	937.591	74.1258	345.96	Lobate-shaped	5327	5407	80	5347.97	11.0749	45.9097	34.8348	25.3412	1.61354	359.502	357.888	255.392	W	0.000274938	0.000343672	0.000412407
865	Relict	T	13	92.4612	29.3871	41096.3	976.48	411.298	98.6788	Tongue-shaped	4889	5097	208	4990.47	13.2625	40.5635	27.3011	30.0879	232.595	320.029	87.4344	291.082	W
866	Intact	T	11	92.4615	29.2964	21818.9	617.16	171.191	144.858	Tongue-shaped	5323	5420	97	5372.31	16.9327	38.1008	21.1681	26.004	229.014	290.556	61.5419	267.05	W	0.000182756	0.000228445	0.000274134
867	Intact	T	11	92.4615	29.2917	55418	1203.78	299.701	157.733	Tongue-shaped	5229	5396	167	5304.39	16.0613	46.8639	30.8026	27.5001	243.635	306.439	62.8045	277.305	W	0.000559311	0.000699139	0.000838967
868	Intact	T	13	92.4619	29.4716	62185.1	1088.63	401.109	183.662	Tongue-shaped	5175	5314	139	5245.59	12.1209	33.2835	21.1627	20.309	217.725	272.045	54.3204	244.477	SW	0.000642238	0.000802797	0.000963357
869	Intact	T	11	92.4621	29.4468	56313.2	1072	295.415	201.33	Tongue-shaped	5218	5309	91	5266.09	6.92133	31.0062	24.0849	17.7118	234.782	322.765	87.9828	282.914	W	0.00057017	0.000712712	0.000855255
870	Intact	T	11	92.4626	29.5263	56220	983.637	290.836	238.906	Tongue-shaped	5224	5318	94	5257.47	3.42096	34.3133	30.8923	19.3681	1.97493	358.698	356.723	292.079	W	0.000569038	0.000711297	0.000853557
871	Intact	T	11	92.4626	29.4609	41858	907.134	180.902	249.451	Lobate-shaped	5313	5381	68	5355.84	3.20284	35.6076	32.4047	21.1462	199.537	322.352	122.816	266.562	W	0.000399399	0.000499248	0.000599098
872	Intact	T	11	92.4629	29.5428	94403.9	1283.16	296.331	367.54	Lobate-shaped	5226	5347	121	5296.83	1.25366	33.6897	32.436	16.0024	0	357.207	357.207	118.448	SE	0.00105989	0.00132486	0.00158983
873	Intact	T	11	92.4629	29.6482	29959.5	706.321	188.852	180.771	Tongue-shaped	4999	5041	42	5016.62	0.777566	37.5323	36.7548	13.9095	7.12502	349.695	342.57	276.279	W	0.000267371	0.000334214	0.000401057
874	Relict	T	11	92.4633	29.7911	36392.8	866.116	199.598	334.066	Lobate-shaped	5083	5147	64	5103.28	5.15586	40.56	35.4041	20.9659	0.806929	359.193	358.386	178.848	S
875	Intact	T	11	92.4636	29.5961	80400.1	1266.1	305.558	325.815	Lobate-shaped	5326	5437	111	5375.34	7.33673	31.4026	24.0659	20.2322	205.408	329.323	123.915	262.919	W	0.000874139	0.00109267	0.00131121
876	Intact	T	10	92.4636	29.4481	39050.4	824.606	259.132	218.369	Tongue-shaped	5275	5330	55	5301.76	7.40094	26.6724	19.2715	14.4775	246.949	294.444	47.4952	271.309	W	0.000367471	0.000459338	0.000551206
877	Intact	D	12	92.4637	29.5824	86432.9	1290.33	274.593	426.871	Lobate-shaped	5332	5419	87	5374.88	1.04316	31.8744	30.8312	17.6347	0	353.29	353.29	242.226	SW	0.000953427	0.00119178	0.00143014
878	Intact	D	12	92.4638	29.3315	70966	1320.51	445.623	188.397	Tongue-shaped	5140	5313	173	5204.3	4.04879	43.4948	39.446	24.2261	37.2079	156.161	118.953	80.4742	E	0.000752545	0.000940682	0.00112882
879	Intact	T	11	92.464	29.4698	43910.4	954.59	192.513	287.707	Lobate-shaped	5234	5325	91	5289.78	3.88212	35.5842	31.7021	16.2342	216.469	337.479	121.01	278.015	W	0.000423013	0.000528767	0.00063452
880	Intact	D	11	92.464	29.3355	22752	822.057	353.778	99.0834	Tongue-shaped	5215	5388	173	5278.81	18.9634	39.0971	20.1337	27.4264	112.574	151.699	39.1251	127.843	SE	0.000192175	0.000240218	0.000288262
881	Intact	D	14	92.4645	29.4761	123064	1661.72	668.441	223.383	Tongue-shaped	5226	5360	134	5301.13	0.695485	40.6925	39.997	13.4015	0.690276	357.51	356.82	260.421	W	0.0014569	0.00182113	0.00218535
882	Intact	D	11	92.4645	29.3334	50115.3	975.202	395.088	163.134	Tongue-shaped	5140	5260	120	5202.71	11.4521	30.2743	18.8222	20.4027	75.2564	164.745	89.4884	120.641	SE	0.000495721	0.000619651	0.000743582
883	Relict	T	10	92.4645	29.4323	17467	722.603	287.138	65.7315	Tongue-shaped	5258	5292	34	5272.1	4.96668	20.439	15.4724	10.2607	187.125	293.499	106.374	238.072	SW
884	Intact	T	11	92.4646	29.4647	23852.9	644.463	141.737	201.942	Lobate-shaped	5337	5387	50	5368.37	10.9547	32.0024	21.0477	19.576	80.5377	132.754	52.2166	108.428	E	0.000203386	0.000254233	0.000305079
885	Intact	T	11	92.4648	29.5297	238506	2515.16	342.589	904.961	Lobate-shaped	5181	5276	95	5240.86	0.491794	26.617	26.1252	12.0571	0	358.452	358.452	269.546	W	0.00322308	0.00402885	0.00483463
886	Intact	T	11	92.4648	29.4535	55717.9	983.951	186.376	305.99	Lobate-shaped	5291	5355	64	5325.36	1.43355	25.6389	24.2054	12.9715	109.537	277.028	167.492	219.641	SW	0.000562945	0.000703681	0.000844417
887	Intact	T	11	92.4651	29.5436	14723.1	521.306	213.312	85.1407	Tongue-shaped	5222	5312	90	5262.5	17.128	38.4975	21.3695	24.7884	5.71059	347.125	341.414	38.7838	NE	0.000113991	0.000142489	0.000170987
888	Intact	D	10	92.4651	29.3288	31112.4	673.316	173.521	186.094	Lobate-shaped	5068	5151	83	5107.17	15.8635	35.0072	19.1437	24.1166	65.6954	115.017	49.3214	87.0694	E	0.000279765	0.000349706	0.000419647
889	Intact	T	10	92.4652	29.6433	21724.9	670.651	284.538	89.0308	Tongue-shaped	5070	5213	143	5118.43	15.6032	43.1015	27.4983	26.242	245.225	288.034	42.8094	265.991	W	0.000181812	0.000227264	0.000272717
890	Intact	D	9	92.4654	29.3249	171313	1588.19	418.097	478.064	Lobate-shaped	5048	5284	236	5143.03	6.0606	50.0277	43.9671	27.4623	57.9946	145.437	87.4429	100.116	E	0.0021668	0.00270851	0.00325021
891	Intact	D	11	92.4654	29.3357	29203.3	844.051	328.609	86.6766	Tongue-shaped	5161	5321	160	5241.21	13.7322	34.234	20.5017	26.4979	127.694	184.086	56.3914	149.449	SE	0.000259292	0.000324116	0.000388939
892	Intact	T	10	92.4656	29.6412	14007.5	483.962	153.009	99.4432	Tongue-shaped	5051	5105	54	5079.53	17.2277	27.0292	9.80146	20.7007	244.44	274.764	30.3236	256.511	W	0.000107376	0.00013422	0.000161063
893	Intact	D	11	92.4656	29.5924	38811.2	839.827	188.478	247.968	Lobate-shaped	5327	5380	53	5350	1.25366	24.2456	22.992	12.7674	17.2415	168.69	151.449	98.7064	E	0.000364772	0.000455965	0.000547158
894	Intact	T	11	92.4658	29.5667	23582.7	699.464	149.685	181.191	Lobate-shaped	5256	5294	38	5275.3	2.33155	26.3197	23.9882	13.705	288.435	356.82	68.3852	313.743	NW	0.000200625	0.000250781	0.000300937
895	Intact	T	11	92.4664	29.5431	66127.6	1050.72	363.521	225.46	Tongue-shaped	5177	5330	153	5264.52	6.27301	45.1471	38.8741	25.0813	1.33222	358.971	357.639	123.262	SE	0.000691404	0.000864255	0.00103711
896	Intact	T	11	92.4664	29.6304	52545.8	1082.52	428.961	249.639	Tongue-shaped	5085	5309	224	5156.98	15.7981	39.7565	23.9584	28.7321	253.951	298.009	44.0582	278.242	W	0.000524709	0.000655886	0.000787063
897	Intact	D	12	92.4665	29.4799	263771	2339.41	607.845	467.703	Tongue-shaped	5183	5319	136	5250.78	1.09958	35.2411	34.1415	14.5056	0	359.326	359.326	265.345	W	0.00363701	0.00454626	0.00545552
898	Intact	T	11	92.4667	29.5863	11475.8	416.691	118.055	121.611	Lobate-shaped	5370	5442	72	5404	24.7707	42.4552	17.6844	33.5219	80.3625	109.455	29.0925	96.2017	E	8.45298e-05	0.000105662	0.000126795
899	Intact	T	13	92.4669	29.626	56772	939.395	263.747	220.119	Tongue-shaped	5139	5238	99	5196.46	6.92133	34.7309	27.8096	20.5072	227.911	315	87.0892	261.508	W	0.000575749	0.000719687	0.000863624
900	Intact	T	11	92.4671	29.5877	9854.44	376.704	112.888	83.2073	Tongue-shaped	5363	5423	60	5389.85	17.5074	37.9963	20.4889	30.7017	56.0937	79.9507	23.8569	69.5197	E	7.04094e-05	8.80118e-05	0.000105614
901	Intact	T	11	92.4671	29.4526	18746	582.177	99.2205	212.497	Lobate-shaped	5339	5367	28	5354.09	7.27193	22.9114	15.6395	14.9	201.801	279.638	77.8361	231.625	SW	0.000152322	0.000190403	0.000228483
902	Intact	T	11	92.4672	29.451	28208	703.505	197.749	137.365	Tongue-shaped	5326	5369	43	5349.29	7.09888	30.6199	23.521	13.9186	268.025	335.395	67.3698	293.975	NW	0.000248725	0.000310906	0.000373087
903	Intact	T	12	92.4672	29.3779	193302	2588.36	213.719	1173.44	Lobate-shaped	5067	5357	290	5227.1	6.81771	51.6716	44.8539	27.9901	0	359.703	359.703	125.996	SE	0.00250471	0.00313088	0.00375706
904	Intact	T	14	92.4673	29.6371	76030.6	1646.91	696.806	169.443	Tongue-shaped	5056	5293	237	5177.71	6.56933	38.3571	31.7878	21.4204	244.895	328.496	83.6003	274.011	W	0.000817445	0.00102181	0.00122617
905	Intact	T	10	92.4677	29.2962	80982.8	1251.9	230.952	386.69	Lobate-shaped	5264	5431	167	5327.97	9.07156	38.8932	29.8216	24.2973	45	146.853	101.853	99.502	E	0.000881747	0.00110218	0.00132262
906	Relict	T	11	92.4678	29.4447	45737.2	835.386	209.004	218.91	Lobate-shaped	5315	5379	64	5353	7.12387	27.95	20.8262	16.2752	79.8245	120.324	40.4991	98.9673	E
907	Intact	D	14	92.4678	29.3343	248528	2852.8	1218.51	247.195	Tongue-shaped	5072	5239	167	5173.2	0.491794	26.7177	26.2259	10.6979	0	356.186	356.186	188.391	S	0.00338627	0.00423284	0.00507941
908	Intact	T	11	92.4678	29.3151	32219.9	757.492	262.382	171.209	Tongue-shaped	4938	5047	109	4982.05	7.89502	39.5299	31.6349	21.4745	14.1986	63.0343	48.8357	39.6992	NE	0.000291757	0.000364696	0.000437635
909	Intact	T	10	92.4679	29.2999	111092	1435.17	490.275	220.397	Tongue-shaped	5287	5548	261	5398.7	4.29349	52.3849	48.0914	26.9766	37.875	180.674	142.799	114.959	SE	0.00128853	0.00161066	0.00193279
910	Intact	T	10	92.4681	29.6751	68767.1	1161.14	208.027	313.938	Lobate-shaped	5042	5104	62	5076.42	0.695485	26.497	25.8015	13.1179	0	358.315	358.315	217.954	SW	0.000724652	0.000905815	0.00108698
911	Intact	T	12	92.4682	29.4954	168604	2131.31	351.457	869.091	Lobate-shaped	5179	5281	102	5240.87	1.43355	31.7219	30.2884	12.3075	4.3987	358.727	354.328	96.6636	E	0.00212575	0.00265719	0.00318863
912	Intact	T	10	92.4686	29.3546	67086.9	1176.06	347.573	216.214	Tongue-shaped	4921	5075	154	4985.22	5.80952	43.1956	37.3861	21.1556	33.9965	156.801	122.805	87.6788	E	0.000703457	0.000879321	0.00105519
913	Intact	T	11	92.4686	29.6226	138136	2221.18	254.6	984.785	Lobate-shaped	5180	5318	138	5250.94	7.22293	31.8413	24.6184	17.1698	220.236	315	94.7636	259.197	W	0.00167355	0.00209194	0.00251033
914	Intact	T	11	92.4687	29.4581	36045.3	894.814	111.68	396.004	Lobate-shaped	5308	5388	80	5342.8	13.1816	45.9468	32.7652	28.9087	0.465808	359.502	359.036	242.907	SW	0.000333804	0.000417255	0.000500705
915	Intact	D	14	92.4688	29.3516	174892	2058.94	774.787	250.533	Tongue-shaped	4950	5293	343	5106.97	3.7562	48.2729	44.5167	23.2231	3.09406	345.964	342.87	64.2938	NE	0.00222125	0.00277656	0.00333187
916	Relict	T	13	92.469	29.4373	186021	2133.2	330.576	918.326	Lobate-shaped	5218	5313	95	5267.58	0.777566	40.0152	39.2377	14.6294	17.1759	215.538	198.362	71.4769	E
917	Intact	D	13	92.4692	29.3483	149025	1719.24	688.549	395.116	Tongue-shaped	5015	5262	247	5113.87	6.3858	44.9769	38.5911	21.4624	13.4486	146.31	132.861	72.7038	E	0.00183309	0.00229137	0.00274964
918	Intact	D	10	92.4693	29.2912	173412	1668.46	423.112	422.679	Tongue-shaped	5187	5332	145	5268.5	4.56438	34.2181	29.6537	18.3619	2.72631	159.905	157.178	76.044	E	0.00219871	0.00274839	0.00329806
919	Intact	D	14	92.4694	29.3109	134299	1901.1	805.038	207.972	Tongue-shaped	4918	5223	305	5052.05	9.98858	36.8402	26.8516	21.6037	26.1468	126.363	100.216	75.5765	E	0.00161793	0.00202241	0.00242689
920	Intact	T	13	92.4696	29.486	168587	2199.18	819.229	362.659	Tongue-shaped	5202	5428	226	5292.48	2.08564	38.4062	36.3206	17.2963	131.566	351.158	219.592	241.397	SW	0.0021255	0.00265688	0.00318825
921	Intact	D	11	92.4696	29.3075	163326	1717.11	663.408	228.558	Tongue-shaped	4934	5255	321	5104.99	8.23812	53.3913	45.1531	25.8339	1.38035	106.821	105.441	40.7578	NE	0.00204616	0.0025577	0.00306924
922	Intact	T	12	92.4699	29.799	25582	608.622	138.336	221.325	Lobate-shaped	5079	5135	56	5101.69	6.80028	41.1738	34.3735	25.0214	0	358.946	358.946	97.474	E	0.000221204	0.000276505	0.000331806
923	Relict	T	12	92.4699	29.4324	28388.7	696.153	239.027	119.899	Tongue-shaped	5244	5321	77	5282.4	10.6722	45.6968	35.0246	22.0718	41.8202	150.945	109.125	83.2762	E
924	Intact	D	11	92.4705	29.3455	50657.2	1046.21	421.337	112.681	Tongue-shaped	5039	5282	243	5152.02	14.2272	48.5142	34.287	29.6329	13.6713	75.8466	62.1753	39.943	NE	0.000502159	0.000627699	0.000753239
925	Intact	T	13	92.4709	29.5422	72520.5	1329.79	329.58	162.591	Tongue-shaped	5204	5369	165	5277.86	7.32866	32.6514	25.3227	20.8617	0.473507	358.315	357.842	49.7625	NE	0.00077237	0.000965463	0.00115856
926	Intact	T	10	92.4712	29.572	35947.8	957.475	108.952	384.654	Lobate-shaped	5233	5366	133	5280.89	4.81983	44.035	39.2152	19.4724	2.92498	357.955	355.03	149.617	SE	0.00033272	0.0004159	0.00049908
927	Intact	D	15	92.4715	29.5859	164615	1909.92	671.922	269.208	Tongue-shaped	5242	5392	150	5311.58	0	28.195	28.195	12.0768	-1	353.367	354.367	61.8253	NE	0.00206556	0.00258194	0.00309833
928	Intact	T	12	92.4718	29.651	84696.7	1423.4	199.292	549.761	Lobate-shaped	5212	5289	77	5240.71	0.491794	31.2202	30.7285	12.578	0	356.987	356.987	166.768	S	0.000930491	0.00116311	0.00139574
929	Relict	T	11	92.4721	29.7129	38522	847.684	256.171	154.54	Tongue-shaped	4923	4998	75	4955.93	7.40094	23.7872	16.3862	14.9354	297.553	357.166	59.6131	336.665	NW
930	Intact	T	11	92.4725	29.4815	74695.1	1457.45	119.943	626.383	Lobate-shaped	5289	5395	106	5341.78	2.33155	27.8722	25.5407	13.696	212.32	353.66	141.34	287.758	W	0.000800246	0.00100031	0.00120037
931	Intact	T	11	92.4727	29.6029	42094.8	1311.21	118.265	573.274	Lobate-shaped	5298	5397	99	5332.51	2.80149	37.572	34.7705	12.5027	0	353.29	353.29	90.4935	E	0.000402112	0.00050264	0.000603168
932	Relict	T	9	92.4728	29.3976	3409.15	370.781	152.487	51.825	Tongue-shaped	4870	4969	99	4910.67	34.4958	50.0365	15.5406	39.691	277.524	290.472	12.9485	282.159	W
933	Intact	T	13	92.4731	29.6167	44058.4	936.938	386.041	140.896	Tongue-shaped	5294	5364	70	5330.21	3.10741	24.2047	21.0973	12.6424	198.435	340.71	142.275	288.803	W	0.000424725	0.000530906	0.000637087
934	Intact	T	10	92.4732	29.6794	33725.3	744.219	235.011	155.593	Tongue-shaped	5129	5198	69	5160.65	3.20284	38.2469	35.044	17.0374	237.529	352.569	115.04	291.326	W	0.000308191	0.000385238	0.000462286
935	Intact	D	14	92.4734	29.5726	96073.8	1278.11	412.045	250.376	Tongue-shaped	5190	5363	173	5264.48	0.983516	36.8402	35.8567	20.5556	0	359.182	359.182	272.256	W	0.00108243	0.00135303	0.00162364
936	Intact	D	11	92.4736	29.6607	62936.9	1044.58	407.263	159.09	Tongue-shaped	5295	5378	83	5338.66	2.50613	21.8419	19.3358	12.6712	37.875	348.69	310.815	240.124	SW	0.000651566	0.000814458	0.000977349
937	Intact	T	11	92.4737	29.3365	41369	787.283	262.884	240.296	Tongue-shaped	5284	5350	66	5318.92	4.66827	35.1612	30.4929	17.8991	89.2152	273.013	183.798	189.835	S	0.000393806	0.000492258	0.00059071
938	Intact	T	12	92.4737	29.8002	52601.8	944.899	178.876	378.682	Lobate-shaped	5092	5173	81	5123.53	1.55485	38.5406	36.9857	20.1543	0	352.367	352.367	259.186	W	0.00052538	0.000656725	0.00078807
939	Intact	D	12	92.4738	29.3451	101390	1425.69	540.878	195.133	Tongue-shaped	5037	5233	196	5126.21	2.08564	46.6988	44.6132	21.8203	0	359.391	359.391	197.21	S	0.00115469	0.00144337	0.00173204
940	Intact	T	12	92.474	29.6143	27800.8	881.932	86.13	379.894	Lobate-shaped	5328	5381	53	5360.55	12.6928	38.0005	25.3077	24.2967	259.114	340.388	81.2734	304.786	NW	0.000244423	0.000305528	0.000366634
941	Intact	T	13	92.4742	29.356	225189	2460.75	475.433	490.462	Lobate-shaped	4890	5372	482	5126.75	6.05077	44.7166	38.6658	27.3894	201.801	324.605	122.804	265.104	W	0.00300835	0.00376043	0.00451252
942	Intact	T	12	92.4743	29.6349	89199.6	1695.16	136.915	724.819	Lobate-shaped	5291	5375	84	5333	2.71406	28.6698	25.9557	9.67337	2.60256	357.51	354.908	253.636	W	0.000990166	0.00123771	0.00148525
943	Intact	D	11	92.4744	29.698	64147.1	1116.53	311.772	253.36	Tongue-shaped	5115	5188	73	5155.58	2.33155	24.5237	22.1922	14.6737	0	358.229	358.229	245.331	SW	0.00066663	0.000833288	0.000999946
944	Intact	T	11	92.4747	29.3937	37189.6	1003.69	381.724	112.188	Tongue-shaped	5041	5231	190	5126.04	18.1003	35.4991	17.3988	25.7178	226.528	276.843	50.3152	253.991	W	0.00034656	0.0004332	0.00051984
945	Intact	D	13	92.4748	29.3733	100301	1215.2	294.16	412.769	Lobate-shaped	5291	5467	176	5360.45	12.1631	39.9975	27.8345	24.2685	1.1233	359.029	357.906	137.908	SE	0.00113982	0.00142478	0.00170973
946	Intact	T	12	92.4748	29.6505	71865.9	1203.16	170.056	461.223	Lobate-shaped	5253	5403	150	5309.32	0.347755	52.7051	52.3574	19.7712	0.535458	357.064	356.529	272.468	W	0.000764012	0.000955015	0.00114602
947	Intact	T	11	92.4749	29.3328	48958	989.65	151.171	416.809	Lobate-shaped	5178	5337	159	5261.05	10.7423	36.5975	25.8552	24.83	232.352	290.695	58.343	261.238	W	0.000482016	0.00060252	0.000723024
948	Intact	T	10	92.4749	29.299	59194.8	1040.22	284.501	166.235	Tongue-shaped	5017	5249	232	5129.13	18.599	46.7581	28.1591	30.3993	61.2602	135.579	74.3185	95.8272	E	0.000605358	0.000756698	0.000908037
949	Intact	T	9	92.4754	29.6694	22736.9	580.5	155.643	184.797	Lobate-shaped	5154	5225	71	5194.85	15.2586	33.9344	18.6758	24.8828	22.0942	76.3287	54.2345	50.7274	NE	0.000192022	0.000240027	0.000288033
950	Intact	T	11	92.4758	29.3362	38517.1	766.925	250.991	173.908	Tongue-shaped	5294	5408	114	5358	12.7684	34.4446	21.6762	24.6192	193.465	269.474	76.0092	231.364	SW	0.000361457	0.000451821	0.000542185
951	Intact	D	12	92.4761	29.6971	62223.8	1262.68	532.65	119.852	Tongue-shaped	5170	5357	187	5228.13	1.55485	45.9468	44.3919	18.6708	0	351.87	351.87	247.042	SW	0.000642717	0.000803397	0.000964076
952	Intact	T	10	92.4763	29.5746	62329.1	1055.2	239.398	316.081	Lobate-shaped	5176	5226	50	5202.35	3.62587	29.2322	25.6063	11.6622	0	358.919	358.919	163.52	S	0.000644024	0.00080503	0.000966035
953	Intact	T	10	92.4763	29.3213	74831.9	1322.21	267.277	422.278	Lobate-shaped	4988	5199	211	5096.87	10.9179	37.0731	26.1552	26.2188	168.44	284.381	115.942	236.303	SW	0.000802004	0.00100251	0.00120301
954	Intact	T	9	92.4764	29.6678	5859.19	333.535	130.119	59.1195	Tongue-shaped	5220	5270	50	5239.17	20.439	39.7475	19.3084	28.5206	27.1497	44.1636	17.0139	35.0216	NE	3.77292e-05	4.71615e-05	5.65938e-05
955	Relict	T	11	92.4767	29.4481	128430	2120.74	684.854	135.256	Tongue-shaped	5208	5391	183	5284.81	1.73826	38.4764	36.7381	17.7384	14.0362	357.274	343.237	69.153	E
956	Intact	D	12	92.4768	29.3006	132453	1662.93	655.587	213.234	Tongue-shaped	4978	5173	195	5051.76	2.80149	42.9565	40.155	18.5376	74.6045	300.964	226.359	192.878	S	0.00159128	0.00198909	0.00238691
957	Intact	T	10	92.4771	29.3807	26989.7	684.708	150.116	209.421	Lobate-shaped	5184	5275	91	5234.03	19.5556	38.1208	18.5652	29.1438	37.6942	75.8466	38.1523	57.3057	NE	0.00023589	0.000294862	0.000353835
958	Intact	T	11	92.4774	29.6145	25807.3	743.818	122.36	316.893	Lobate-shaped	5341	5417	76	5374.64	4.34904	38.213	33.8639	19.7247	25.4633	124.563	99.0992	83.1089	E	0.000223544	0.000279431	0.000335317
959	Relict	T	11	92.4777	29.2809	110497	1998.72	914.356	148.425	Tongue-shaped	4791	5202	411	4981.49	12.6168	46.9822	34.3654	26.303	46.5482	126.158	79.61	80.9036	E
960	Relict	T	12	92.4784	29.4978	135489	2093.12	204.414	903.233	Lobate-shaped	5179	5344	165	5265.68	2.45752	27.9872	25.5297	15.9366	172.747	317.726	144.98	247.095	SW
961	Intact	D	12	92.4785	29.3634	255172	2483.12	406.208	959.87	Lobate-shaped	5143	5473	330	5297.86	0.777566	43.8585	43.0809	17.3045	11.9761	351.254	339.278	262.262	W	0.0034952	0.004369	0.0052428
962	Intact	T	10	92.4788	29.3798	99826.2	1816.26	786.615	118.094	Tongue-shaped	5161	5327	166	5233.58	1.73826	43.7461	42.0079	20.5819	0	359.444	359.444	78.9931	E	0.00113336	0.00141669	0.00170003
963	Intact	T	10	92.4788	29.3824	58148.2	1230.44	156.606	516.319	Lobate-shaped	5126	5228	102	5178.54	2.80149	28.9716	26.1701	18.4475	217.875	327.529	109.654	278.638	W	0.000592537	0.000740672	0.000888806
964	Intact	T	11	92.4794	29.459	100903	1591.11	220.565	581.42	Lobate-shaped	5181	5247	66	5223.81	2.11438	25.9785	23.8641	11.9815	0	355.101	355.101	97.9772	E	0.00114804	0.00143505	0.00172206
965	Intact	T	11	92.4794	29.6028	19541.3	684.65	97.9963	264.887	Lobate-shaped	5211	5268	57	5246.78	6.6144	27.5701	20.9557	16.8223	1.77147	355.815	354.044	75.8516	E	0.000160109	0.000200137	0.000240164
966	Intact	D	13	92.4795	29.6421	242581	2184.92	656.798	303.322	Tongue-shaped	5246	5534	288	5355.44	1.43355	46.4781	45.0446	18.1453	0	358.603	358.603	111.457	E	0.00328928	0.0041116	0.00493391
967	Intact	T	11	92.4798	29.4844	27632.7	676.067	134.651	205.867	Lobate-shaped	5356	5426	70	5380.34	8.06484	42.8542	34.7893	25.4185	92.1211	136.042	43.9205	113.438	SE	0.00024265	0.000303312	0.000363975
968	Relict	T	11	92.4798	29.4447	42107.9	857.504	319.464	130.663	Tongue-shaped	5205	5325	120	5269.22	9.85982	29.891	20.0311	21.9571	31.7014	90	58.2986	62.229	NE
969	Intact	T	11	92.4803	29.4727	116489	2926.9	114.798	1364.61	Lobate-shaped	5210	5380	170	5284.42	2.50613	34.8783	32.3722	21.4079	120.964	281.31	160.346	228.246	SW	0.001364	0.001705	0.002046
970	Intact	T	11	92.4804	29.4811	67057.4	1108.83	288.221	271.242	Tongue-shaped	5286	5386	100	5340.14	1.87208	37.9627	36.0906	22.0825	25.56	115.821	90.261	75.2037	E	0.000703086	0.000878858	0.00105463
971	Intact	T	11	92.4806	29.4884	28863	635.298	154.245	214.508	Lobate-shaped	5367	5460	93	5413.82	15.048	37.6528	22.6048	26.7151	63.4349	145.46	82.025	105.108	E	0.000255671	0.000319589	0.000383507
972	Intact	T	11	92.4807	29.5376	225956	2148.18	504.756	371.409	Tongue-shaped	5157	5324	167	5236.18	1.39077	43.8864	42.4957	19.0186	0	359.484	359.484	222.187	SW	0.00302066	0.00377582	0.00453099
973	Intact	D	12	92.481	29.3775	248496	2384.64	672.06	496.073	Tongue-shaped	5237	5457	220	5312.4	0.695485	58.3992	57.7037	21.7359	1.99017	358.877	356.887	202.037	S	0.00338575	0.00423219	0.00507863
974	Intact	T	10	92.4814	29.3792	16438.5	639.898	87.28	240.087	Lobate-shaped	5238	5283	45	5253.06	2.71406	44.4674	41.7533	22.2001	185.194	301.675	116.481	250.808	W	0.000130109	0.000162636	0.000195163
975	Intact	D	11	92.4815	29.5071	30023.1	663.708	167.964	172.951	Lobate-shaped	5227	5334	107	5276.14	22.9135	49.1862	26.2727	33.5724	321.47	358.815	37.3449	341.661	N	0.000268052	0.000335065	0.000402078
976	Intact	T	12	92.4817	29.6655	26539.8	692.834	127.243	276.831	Lobate-shaped	5270	5335	65	5306.94	2.22563	27.8629	25.6373	15.29	2.1211	357.274	355.153	293.472	NW	0.00023118	0.000288974	0.000346769
977	Intact	T	11	92.4817	29.3195	75228.5	1411.07	632.215	135.921	Tongue-shaped	5016	5216	200	5098.78	4.93039	54.4415	49.5111	20.2362	220.84	294.444	73.6036	261.571	W	0.000807107	0.00100888	0.00121066
978	Intact	D	11	92.4819	29.6992	181906	2304.26	913.643	227.02	Tongue-shaped	5190	5320	130	5264.54	1.47509	30.5086	29.0335	11.5477	0	351.87	351.87	233.728	SW	0.00232857	0.00291071	0.00349286
979	Intact	D	13	92.4821	29.3326	112558	1502.85	473.968	199.836	Tongue-shaped	5326	5458	132	5385.97	0.695485	34.9434	34.2479	14.6209	90	355.601	265.601	232.612	SW	0.00130895	0.00163619	0.00196342
980	Intact	T	10	92.4823	29.7088	331304	2757.78	369.784	1046.77	Lobate-shaped	5003	5137	134	5077.85	0.347755	36.8339	36.4861	11.8595	0	359.061	359.061	156.135	SE	0.00478128	0.0059766	0.00717192
981	Intact	T	13	92.4824	29.681	102017	1310.42	437.247	254.253	Tongue-shaped	5188	5282	94	5240.5	1.43355	33.4978	32.0643	12.9794	0	358.452	358.452	246.554	SW	0.00116327	0.00145409	0.0017449
982	Intact	T	11	92.4825	29.4893	16778.3	481.598	120.598	171.421	Lobate-shaped	5352	5404	52	5377.33	14.2272	31.0023	16.7751	22.4547	135	218.571	83.5713	180.684	S	0.000133343	0.000166679	0.000200015
983	Intact	T	12	92.4827	29.6672	21695.8	673.525	203.207	81.8276	Tongue-shaped	5258	5326	68	5295.92	13.9102	26.2923	12.382	19.0992	254.745	331.858	77.1135	290.94	W	0.000181519	0.000226899	0.000272279
984	Intact	T	11	92.4827	29.2894	154730	2024.04	251.012	866.965	Lobate-shaped	4635	4920	285	4761.31	8.03558	45.6171	37.5816	26.1569	1.44412	358.781	357.337	35.2584	NE	0.00191762	0.00239703	0.00287643
985	Intact	D	13	92.4828	29.6776	30455.5	732.682	258.546	144.878	Tongue-shaped	5278	5381	103	5324.78	9.72324	37.3201	27.5969	21.2404	0.93919	358.995	358.056	55.7182	NE	0.000272691	0.000340864	0.000409037
986	Intact	T	11	92.4831	29.4763	128893	2107.07	145.348	920.838	Lobate-shaped	5258	5357	99	5313.33	4.06359	42.8713	38.8077	22.497	19.0935	126.87	107.776	70.307	E	0.0015401	0.00192512	0.00231015
987	Intact	T	12	92.4832	29.6435	24565.3	686.719	118.025	234.881	Lobate-shaped	5220	5268	48	5245.97	7.33673	20.6906	13.3538	12.4565	0	358.919	358.919	118.488	SE	0.000210697	0.000263372	0.000316046
988	Intact	D	9	92.4839	29.3989	69582.2	1390.9	594.963	134.655	Tongue-shaped	5015	5332	317	5151.79	11.9885	43.1273	31.1388	27.8195	21.4385	105.018	83.5799	48.9441	NE	0.000734971	0.000918714	0.00110246
989	Intact	T	9	92.4839	29.6709	45551.6	1029.4	152.288	335.407	Lobate-shaped	5346	5448	102	5388.23	7.95452	30.277	22.3224	18.0058	169.992	280.62	110.628	220.073	SW	0.000442056	0.00055257	0.000663084
990	Intact	T	11	92.4848	29.4873	52984.1	1010.58	183.892	394.115	Lobate-shaped	5297	5379	82	5333.39	9.5297	29.1154	19.5857	21.4272	169.824	233.616	63.7912	211.909	SW	0.000529966	0.000662457	0.000794948
991	Intact	T	11	92.485	29.6773	20756.7	582.064	120.223	209.611	Lobate-shaped	5273	5317	44	5286.8	5.92135	38.403	32.4816	18.2377	0	356.479	356.479	142.617	SE	0.000172132	0.000215165	0.000258198
992	Intact	T	10	92.4853	29.6442	5631.57	356.436	45.9237	154.008	Lobate-shaped	5209	5227	18	5220.33	11.4521	24.7065	13.2544	18.1246	14.0362	346.799	332.763	177.739	S	3.59772e-05	4.49715e-05	5.39658e-05
993	Intact	T	11	92.4853	29.6657	5780.91	330.219	57.7381	112.439	Lobate-shaped	5403	5419	16	5409.4	14.0856	23.7691	9.6835	17.7293	282.848	344.745	61.8972	307.765	NW	3.71251e-05	4.64064e-05	5.56876e-05
994	Intact	T	9	92.4857	29.3164	20264	570.405	210.339	101.721	Tongue-shaped	5127	5224	97	5186.12	12.8742	43.1183	30.2441	25.2143	200.934	246.93	45.9952	220.228	SW	0.000167241	0.000209051	0.000250861
995	Relict	T	12	92.4866	29.6191	67126.5	1065.21	292.713	228.456	Tongue-shaped	4906	4987	81	4935.59	2.86531	29.6014	26.7361	14.0354	21.3706	216.119	194.749	86.0351	E
996	Intact	T	11	92.4867	29.485	44399.7	870.096	230.774	251.119	Lobate-shaped	5269	5350	81	5309.06	8.31626	34.2085	25.8923	20.0346	173.83	263.234	89.404	227.532	SW	0.000428676	0.000535845	0.000643014
997	Relict	T	12	92.4869	29.629	119376	1671.14	596.699	252.095	Tongue-shaped	4862	5156	294	4955.35	5.76831	50.9328	45.1645	22.2169	48.8141	148.241	99.4264	99.6946	E
998	Intact	T	11	92.4874	29.5359	148783	1841.83	317.154	518.05	Lobate-shaped	5212	5378	166	5288.29	6.6144	38.9241	32.3097	23.2028	0	359.409	359.409	72.3687	E	0.00182951	0.00228689	0.00274427
999	Relict	T	9	92.4874	29.8303	10517.3	425.962	82.3429	145.337	Lobate-shaped	5161	5194	33	5175.67	13.1431	23.8152	10.6721	19.2504	1.7357	357.825	356.09	180.986	S
1000	Intact	T	10	92.4876	29.702	21589.8	855.97	330.858	136.134	Tongue-shaped	5175	5369	194	5238.73	17.8085	41.1738	23.3653	27.7038	30.2564	71.565	41.3086	52.3607	NE	0.000180455	0.000225569	0.000270683
1001	Intact	T	11	92.4877	29.6771	8487.56	488.212	56.4648	216.934	Lobate-shaped	5283	5354	71	5327.54	20.3568	38.6061	18.2493	27.7091	305.64	335.2	29.56	323.387	NW	5.88589e-05	7.35736e-05	8.82883e-05
1002	Intact	D	10	92.4877	29.3858	96055.4	1260.59	381.578	271.29	Tongue-shaped	5197	5435	238	5304.04	4.90604	43.9126	39.0066	31.1376	0	356.889	356.889	87.9504	E	0.00108218	0.00135272	0.00162327
1003	Intact	T	10	92.4881	29.5018	65949.6	1058.4	310.936	146.633	Tongue-shaped	5340	5495	155	5405.07	5.29321	42.0349	36.7417	26.6757	37.0304	137.291	100.26	74.1179	E	0.000689172	0.000861464	0.00103376
1004	Relict	T	9	92.4882	29.8314	20353.9	623.857	253.428	95.6465	Tongue-shaped	5140	5241	101	5169.96	4.29349	46.5578	42.2643	21.8751	48.3665	355.601	307.235	300.091	NW
1005	Intact	D	11	92.4883	29.5116	255314	2249.31	495.142	730.801	Lobate-shaped	5256	5360	104	5307.69	1.47509	26.7394	25.2643	13.0676	0	359.061	359.061	288.191	W	0.00349753	0.00437191	0.0052463
1006	Relict	T	11	92.4883	29.5829	98223.6	1292.24	466.49	250.828	Tongue-shaped	4943	5185	242	5031.13	2.86531	41.6972	38.8319	26.2001	120.964	318.434	197.47	272.631	W
1007	Relict	T	14	92.4883	29.6045	244482	2392.02	922.275	417.206	Tongue-shaped	4931	5219	288	5064.96	1.39077	48.9616	47.5709	19.5161	1.08092	347.471	346.39	88.019	E
1008	Intact	T	10	92.4885	29.7006	25653.7	616.425	133.28	224.85	Lobate-shaped	5179	5225	46	5200.9	2.94823	33.1107	30.1625	19.6821	0	340.017	340.017	62.3465	NE	0.000221949	0.000277436	0.000332923
1009	Intact	T	11	92.4886	29.4705	82151	1415.4	173.992	612.648	Lobate-shaped	5145	5250	105	5196.11	5.15586	35.9154	30.7595	18.3866	48.9647	123.69	74.7254	88.375	E	0.000897032	0.00112129	0.00134555
1010	Intact	T	11	92.4887	29.4822	65877.4	1130.76	179.653	422.363	Lobate-shaped	5238	5328	90	5274.23	1.55485	33.4167	31.8618	19.9562	18.4349	286.928	268.493	228.285	SW	0.000688266	0.000860332	0.0010324
1011	Intact	T	9	92.4887	29.4945	56198	948.816	251.646	287.758	Lobate-shaped	5283	5384	101	5335.42	14.0102	47.4384	33.4282	26.7176	104.744	149.036	44.2927	125.151	SE	0.000568771	0.000710964	0.000853156
1012	Relict	T	10	92.4889	29.5867	35992	1067.41	434.169	123.742	Tongue-shaped	4954	5163	209	5033.61	2.45752	49.3826	46.925	25.0339	158.629	316.146	157.516	283.46	W
1013	Relict	T	12	92.4894	29.6139	43519.5	966.128	356.051	146.836	Tongue-shaped	4896	5044	148	4951.02	10.865	40.189	29.324	21.6048	236.768	281.31	44.5416	258.551	W
1014	Relict	T	12	92.4897	29.6153	79500.2	1347.85	531.496	189.712	Tongue-shaped	4887	5102	215	4972.34	3.2955	35.3285	32.033	21.898	238.707	344.476	105.769	275.253	W
1015	Intact	T	11	92.4897	29.7848	193801	2219.95	306.316	825.949	Lobate-shaped	4946	5043	97	4996.36	0.777566	35.8857	35.1082	17.0674	0	358.727	358.727	265.411	W	0.00251246	0.00314057	0.00376869
1016	Intact	T	13	92.4899	29.4616	237636	2401.13	1008.74	318.538	Tongue-shaped	5009	5213	204	5121.58	0.777566	28.6534	27.8759	14.9958	0	356.82	356.82	71.5854	E	0.00320897	0.00401122	0.00481346
1017	Intact	T	9	92.4899	29.4994	126615	1594.55	361.753	352.566	Tongue-shaped	5296	5431	135	5350.03	1.77267	43.9223	42.1496	22.3064	27.0309	198.435	171.404	84.3828	E	0.00150749	0.00188436	0.00226124
1018	Relict	T	13	92.49	29.5918	201027	1813.13	585.327	411.821	Tongue-shaped	4922	5164	242	5023.07	2.11438	44.8809	42.7665	20.3648	21.0375	358.668	337.63	278.346	W
1019	Intact	T	11	92.49	29.4802	16399.7	508.362	115.252	146.423	Lobate-shaped	5249	5316	67	5276.94	13.8458	41.6184	27.7726	32.4565	234.926	273.077	38.1512	256.233	W	0.000129741	0.000162176	0.000194611
1020	Relict	T	12	92.4904	29.6297	164450	1635.68	397.889	516.738	Lobate-shaped	4861	5062	201	4936.77	3.12673	41.719	38.5923	23.7183	0	355.601	355.601	280.353	W
1021	Intact	T	14	92.4904	29.4909	360887	3499.93	434.999	1393.67	Lobate-shaped	5212	5397	185	5278.42	0.777566	40.8811	40.1036	12.3908	0	358.668	358.668	77.2512	E	0.00529808	0.0066226	0.00794712
1022	Intact	T	9	92.4905	29.6644	22291.3	928.502	360.206	71.4063	Tongue-shaped	5266	5461	195	5347.57	12.1631	44.2911	32.128	27.6375	4.12759	81.0274	76.8998	32.9156	NE	0.000187515	0.000234394	0.000281272
1023	Intact	T	9	92.4907	29.5024	33370.8	818.743	136.794	289.642	Lobate-shaped	5307	5359	52	5335.93	2.64657	24.5448	21.8982	12.9857	110.225	202.38	92.1553	158.889	S	0.000304308	0.000380385	0.000456461
1024	Relict	T	10	92.4907	29.6125	33328.9	706.383	202.885	166.724	Tongue-shaped	4919	4997	78	4963.41	7.767	32.677	24.91	20.3287	235.886	272.366	36.4807	257.719	W
1025	Relict	T	14	92.4907	29.6063	84401.6	1185.51	293.252	290.48	Tongue-shaped	4919	5033	114	4966.95	0.491794	28.5998	28.108	18.2701	9.05789	346.608	337.55	286.305	W
1026	Intact	D	10	92.4911	29.7397	88243.8	1445.53	275.002	609.776	Lobate-shaped	5109	5187	78	5152.62	1.55485	29.415	27.8601	12.3612	0	356.424	356.424	220.226	SW	0.000977447	0.00122181	0.00146617
1027	Intact	T	11	92.4912	29.474	83562.4	1554.82	149.834	666.519	Lobate-shaped	5184	5298	114	5228.96	4.19449	48.8423	44.6478	25.687	106.557	337.62	231.063	246.784	SW	0.000915558	0.00114445	0.00137334
1028	Intact	D	12	92.4912	29.7765	72033	1332.47	237.771	458.105	Lobate-shaped	5045	5154	109	5096.81	6.0606	28.0537	21.9931	17.1432	1.88819	345.7	343.812	283.655	W	0.000766144	0.000957681	0.00114922
1029	Relict	T	13	92.4913	29.611	43658.8	867.382	347.579	144.488	Tongue-shaped	4910	5070	160	4989.9	11.209	33.3183	22.1093	24.4147	246.557	278.707	32.1503	262.652	W
1030	Relict	T	11	92.4917	29.6325	29962.5	731.122	253.261	109.28	Tongue-shaped	4866	4976	110	4925.49	7.767	35.901	28.134	22.1228	257.196	308.118	50.9225	284.611	W
1031	Intact	T	9	92.4917	29.6639	14603.3	466.904	144.387	112.462	Tongue-shaped	5231	5318	87	5275.5	23.6583	43.8373	20.179	34.5479	15.2551	48.0128	32.7577	38.9343	NE	0.000112879	0.000141099	0.000169318
1032	Relict	T	10	92.4925	29.5659	83432.3	1251.97	420.64	257.475	Tongue-shaped	5093	5379	286	5193.75	17.0527	44.7966	27.7438	30.4831	10.1455	61.607	51.4614	31.5697	NE
1033	Relict	T	11	92.4925	29.5893	100921	1886.51	853.729	175.631	Tongue-shaped	5024	5382	358	5201.78	2.98883	46.409	43.4202	25.8588	258.207	354.644	96.4376	290.079	W
1034	Intact	T	11	92.493	29.4485	51101.1	971.601	306.414	228.44	Tongue-shaped	5179	5291	112	5216.66	5.00271	38.0089	33.0062	18.8929	1.84761	356.906	355.058	300.157	NW	0.000507444	0.000634306	0.000761167
1035	Intact	D	13	92.4935	29.3671	207497	1879.34	706.008	274.193	Tongue-shaped	5014	5273	259	5139.09	1.73826	38.5089	36.7707	19.1153	0	358.152	358.152	84.9718	E	0.00272701	0.00340876	0.00409051
1036	Intact	T	11	92.4937	29.5355	62630.7	1147.08	326.413	134.555	Tongue-shaped	5264	5364	100	5309.88	0.777566	40.7727	39.9951	19.8421	0.784824	357.436	356.651	297.725	NW	0.000647765	0.000809706	0.000971647
1037	Intact	D	11	92.4943	29.5064	22542.2	704.219	110.032	262.249	Lobate-shaped	5377	5440	63	5404.42	8.99385	23.4447	14.4508	15.261	74.859	160.408	85.5487	126.217	SE	0.00019005	0.000237562	0.000285075
1038	Intact	D	11	92.4946	29.5176	102248	1629.13	272.113	629.998	Lobate-shaped	5279	5417	138	5349.84	2.80149	40.5172	37.7157	22.2435	206.565	345.141	138.576	271.457	W	0.00116643	0.00145804	0.00174965
1039	Intact	T	11	92.4947	29.7783	33639	1159.13	115.875	511.698	Lobate-shaped	5136	5187	51	5169.1	0.777566	29.5803	28.8027	14.0853	53.1301	358.21	305.08	232.707	SW	0.000307245	0.000384056	0.000460868
1040	Intact	T	11	92.4947	29.6803	21163.7	616.037	113.331	256.43	Lobate-shaped	5385	5459	74	5421.38	11.9552	38.1765	26.2213	22.0152	252.3	321.892	69.5928	277.003	W	0.000176191	0.000220238	0.000264286
1041	Intact	D	14	92.4948	29.6053	333211	4330.59	1840.78	313.661	Tongue-shaped	4955	5509	554	5192.54	0.347755	47.7175	47.3698	21.4077	0	358.112	358.112	254.385	W	0.00481433	0.00601792	0.0072215
1042	Intact	D	10	92.495	29.3601	42996.7	874.44	341.628	160.114	Tongue-shaped	5184	5350	166	5254.71	11.665	42.4577	30.7926	26.5991	43.3153	94.7636	51.4483	59.7322	NE	0.000412472	0.00051559	0.000618708
1043	Intact	T	11	92.4951	29.4519	59668.8	1471.42	162.066	579.121	Lobate-shaped	5098	5184	86	5150.01	3.74016	42.5559	38.8158	19.2008	228.366	353.454	125.087	302.412	NW	0.00061118	0.000763975	0.00091677
1044	Intact	D	11	92.4955	29.506	7886.08	343.052	103.355	74.8506	Tongue-shaped	5356	5388	32	5375.5	8.62817	24.3679	15.7397	18.4744	182.291	210.964	28.6732	194.179	S	5.38897e-05	6.73622e-05	8.08346e-05
1045	Intact	T	11	92.4955	29.4819	220488	3071.23	264.462	1386.11	Lobate-shaped	5177	5411	234	5256.12	0.695485	44.8276	44.1321	15.1165	7.69605	307.405	299.709	97.5918	E	0.00293316	0.00366645	0.00439974
1046	Intact	D	11	92.4956	29.6879	128881	1486.29	438.503	254.991	Tongue-shaped	5214	5345	131	5280.38	2.80149	35.4578	32.6564	17.4191	0	358.363	358.363	179.733	S	0.00153993	0.00192491	0.00230989
1047	Intact	D	11	92.496	29.5017	125528	1620.67	661.093	201.559	Tongue-shaped	5250	5377	127	5332.63	0.777566	35.7279	34.9504	13.3816	14.0362	350.538	336.501	208.292	SW	0.00149197	0.00186497	0.00223796
1048	Intact	T	11	92.4961	29.3777	26074.2	648.544	248.948	130.035	Tongue-shaped	4911	4999	88	4937.84	1.43355	38.3284	36.8948	18.2803	0	348.69	348.69	253.134	W	0.000226321	0.000282902	0.000339482
1049	Intact	T	11	92.4963	29.5833	47321	1073.92	202.627	395.285	Lobate-shaped	5371	5508	137	5433.49	5.71636	43.97	38.2536	23.5618	4.60009	352.972	348.371	225.598	SW	0.00046274	0.000578425	0.00069411
1050	Intact	D	13	92.4963	29.3617	192574	1889	682.172	387.642	Tongue-shaped	5164	5258	94	5204.59	1.25366	33.8814	32.6278	11.9379	0.763898	358.264	357.5	230.603	SW	0.00249338	0.00311673	0.00374007
1051	Intact	T	10	92.4965	29.7483	33846.7	1035.83	404.485	116.562	Tongue-shaped	5070	5244	174	5157.5	12.5808	33.4167	20.8359	23.7323	231.667	298.74	67.0732	265.975	W	0.000309522	0.000386903	0.000464283
1052	Intact	D	10	92.4966	29.3254	53115.5	870.339	292.523	187.345	Tongue-shaped	5179	5320	141	5238.42	8.06484	41.1936	33.1288	25.7762	1.16914	359.454	358.285	53.3342	NE	0.000531543	0.000664429	0.000797314
1053	Intact	D	11	92.4967	29.3583	68637.8	1169.94	424.417	152.545	Tongue-shaped	5202	5315	113	5254.06	4.51153	30.5086	25.997	17.0111	0	358.854	358.854	157.887	S	0.000723017	0.000903771	0.00108452
1054	Intact	T	10	92.4973	29.5951	21981.4	592.903	110.732	216.206	Lobate-shaped	5183	5236	53	5210.04	3.2955	30.1769	26.8814	17.7536	0	357.797	357.797	289.995	W	0.00018439	0.000230488	0.000276586
1055	Intact	D	11	92.4973	29.51	79956.1	1198.01	290.714	216.183	Tongue-shaped	5351	5500	149	5401.64	5.41599	38.5891	33.1731	19.5885	5.90614	120.793	114.887	66.8218	NE	0.000868349	0.00108544	0.00130252
1056	Intact	T	11	92.4974	29.7903	64448.2	1166.45	180.605	498.587	Lobate-shaped	5076	5134	58	5110.66	1.73826	25.7954	24.0572	11.0197	2.29061	356.987	354.697	252.451	W	0.000670387	0.000837984	0.00100558
1057	Intact	T	10	92.4975	29.3428	31795.4	772.678	167.466	292.049	Lobate-shaped	5297	5399	102	5327.87	7.72892	44.7853	37.0564	19.9338	29.9315	108.435	78.5034	68.8753	E	0.000287151	0.000358938	0.000430726
1058	Intact	D	10	92.4975	29.739	50784.3	897.32	255.092	190.171	Tongue-shaped	5192	5261	69	5224.18	7.13218	34.9099	27.7777	14.839	1.27303	358.877	357.604	152.176	SE	0.000503672	0.00062959	0.000755508
1059	Intact	D	13	92.4977	29.4231	392254	3972.87	1634.83	540.012	Tongue-shaped	4507	5101	594	4720.71	1.04316	44.4059	43.3628	19.9472	0	359.605	359.605	268.444	W	0.00585536	0.0073192	0.00878304
1060	Intact	T	11	92.4979	29.7155	23995	767.833	91.5729	332.203	Lobate-shaped	5347	5414	67	5375.86	14.3168	33.7127	19.3958	21.8987	230.807	299.157	68.3502	264.752	W	0.000204841	0.000256051	0.000307261
1061	Intact	D	12	92.4981	29.7867	47927	1134.58	462.297	126.808	Tongue-shaped	5118	5229	111	5169.93	3.69162	37.2754	33.5838	18.7369	2.29061	350.538	348.247	75.8948	E	0.000469861	0.000587326	0.000704791
1062	Intact	D	11	92.4984	29.524	60101.3	945.701	259.734	263.841	Lobate-shaped	5330	5444	114	5376.68	9.46218	44.1272	34.665	21.7882	226.245	295.56	69.3146	261.704	W	0.0006165	0.000770625	0.00092475
1063	Intact	D	10	92.4987	29.7369	21597.9	771.907	293.088	115.204	Tongue-shaped	5246	5406	160	5305.77	10.9179	42.7683	31.8505	29.5275	1.34472	358.898	357.554	216.213	SW	0.000180537	0.000225671	0.000270806
1064	Intact	T	11	92.4987	29.7181	48655.8	937.864	178.431	374.234	Lobate-shaped	5348	5434	86	5396.52	4.23721	35.7945	31.5573	23.264	243.034	348.024	104.99	280.943	W	0.000478447	0.000598059	0.00071767
1065	Intact	T	10	92.499	29.7589	24016.6	708.269	256.661	116.505	Tongue-shaped	5124	5187	63	5156.3	4.62959	23.0716	18.442	15.2443	147.995	327.995	180	289.154	W	0.000205062	0.000256328	0.000307593
1066	Intact	D	12	92.4991	29.3154	82096.3	1428.57	612.302	169.821	Tongue-shaped	5086	5277	191	5176.66	7.2963	37.0178	29.7215	19.0888	7.25319	358.636	351.383	64.4944	NE	0.000896315	0.00112039	0.00134447
1067	Intact	T	9	92.4996	29.6777	8315.74	386.996	53.727	155.017	Lobate-shaped	5427	5469	42	5442.3	21.5395	37.45	15.9105	29.4227	30.2564	70.1148	39.8584	50.6742	NE	5.74319e-05	7.17899e-05	8.61479e-05
1068	Relict	T	11	92.4997	29.4981	54201	1133.56	141.264	477.538	Lobate-shaped	5225	5292	67	5254.73	3.20284	33.7291	30.5262	17.8383	162.897	280.491	117.594	207.442	SW
1069	Intact	T	13	92.4998	29.4605	248514	2268.82	891.994	332.973	Tongue-shaped	4858	5082	224	4963.4	1.47509	36.4511	34.976	15.7633	0	359.484	359.484	134.859	SE	0.00338605	0.00423256	0.00507907
1070	Intact	D	11	92.5004	29.593	67377.6	1195.19	431.703	161.985	Tongue-shaped	5258	5457	199	5345.53	3.74016	52.2067	48.4666	25.3823	0	359.293	359.293	120.644	SE	0.000707117	0.000883896	0.00106067
1071	Intact	T	11	92.5012	29.3691	29049.4	772.768	132.374	185.508	Lobate-shaped	5248	5341	93	5291.83	12.4037	33.6469	21.2432	23.9245	305.91	358.647	52.7371	335.989	NW	0.000257654	0.000322068	0.000386481
1072	Intact	D	13	92.5013	29.7652	111462	1625.28	569.483	151.122	Tongue-shaped	5133	5357	224	5246.62	3.20284	50.039	46.8362	20.7791	152.65	324.367	171.716	252.971	W	0.00129368	0.0016171	0.00194052
1073	Intact	D	11	92.5013	29.6898	119308	1601.39	221.876	590.802	Lobate-shaped	5230	5325	95	5284.14	1.43355	39.1455	37.712	15.8946	3.81407	358.781	354.967	294.857	NW	0.00140371	0.00175464	0.00210557
1074	Intact	D	11	92.5018	29.7082	1.23378e+06	6173.88	2076.53	619.763	Tongue-shaped	5107	5479	372	5269.48	0.347755	52.537	52.1892	13.4743	0	359.029	359.029	220.56	SW	0.023161	0.0289512	0.0347415
1075	Intact	T	13	92.5019	29.5081	133047	1525.85	503.873	237.941	Tongue-shaped	5232	5333	101	5285.92	2.77989	32.7003	29.9204	14.3269	42.7543	176.987	134.233	105.4	E	0.00159985	0.00199981	0.00239977
1076	Intact	T	11	92.502	29.6096	51646.7	1223.75	519.734	165.792	Tongue-shaped	5333	5610	277	5449.6	9.1995	44.819	35.6195	27.0933	212.56	297.121	84.5609	250.834	W	0.000513953	0.000642442	0.00077093
1077	Intact	T	10	92.5021	29.5044	106738	1277.86	330.361	297.169	Tongue-shaped	5199	5305	106	5253.72	1.04316	35.2171	34.174	17.4931	32.2756	162.759	130.483	78.3783	E	0.00122816	0.0015352	0.00184224
1078	Intact	T	10	92.5021	29.6362	57247.8	1140.56	410.429	152.926	Tongue-shaped	5048	5311	263	5163.16	4.96668	42.0987	37.132	30.6963	19.5367	340.463	320.927	53.7084	NE	0.000581545	0.000726931	0.000872317
1079	Intact	T	13	92.5022	29.5945	218311	2045	789.825	264.534	Tongue-shaped	5235	5335	100	5289.48	0.491794	29.3466	28.8548	12.4168	0	355.365	355.365	210.858	SW	0.00289843	0.00362304	0.00434765
1080	Intact	T	10	92.5022	29.5716	77424.7	1178.91	255.799	351.97	Lobate-shaped	5254	5335	81	5295.05	5.88094	26.1872	20.3063	13.6662	163.072	317.726	154.654	254.553	W	0.000835465	0.00104433	0.0012532
1081	Intact	T	11	92.5022	29.7232	106325	1241.18	313.387	423.403	Lobate-shaped	5172	5243	71	5212.54	0.695485	27.062	26.3665	13.8445	0	359.215	359.215	142.291	SE	0.00122246	0.00152808	0.0018337
1082	Intact	T	10	92.5023	29.506	46529.4	1098.3	403.126	114.487	Tongue-shaped	5219	5323	104	5270.8	1.25366	34.9546	33.7009	16.3264	52.125	168.69	116.565	111.132	E	0.000453467	0.000566833	0.0006802
1083	Intact	T	9	92.5023	29.6277	15169.5	638.228	86.8419	260.838	Lobate-shaped	5267	5283	16	5275.16	0.347755	22.1852	21.8374	7.76421	11.3099	329.036	317.726	160.156	S	0.000118151	0.000147688	0.000177226
1084	Intact	T	10	92.5023	29.5927	31534.7	958.676	400.178	119.992	Tongue-shaped	5289	5363	74	5310.13	0.777566	30.6199	29.8423	15.522	1.4688	348.69	347.221	116.462	SE	0.000284328	0.00035541	0.000426492
1085	Intact	D	11	92.5024	29.6952	72382.4	1412.85	632.852	129.514	Tongue-shaped	5267	5395	128	5351.64	6.6144	32.0315	25.4171	18.4276	88.9949	254.389	165.394	178.339	S	0.000770605	0.000963256	0.00115591
1086	Intact	T	9	92.5026	29.6236	29560.4	870.37	102.351	376.377	Lobate-shaped	5276	5314	38	5295.42	3.20284	46.0083	42.8055	19.4614	4.3987	94.5378	90.1391	56.8922	NE	0.000263103	0.000328878	0.000394654
1087	Intact	D	13	92.5028	29.4704	167622	2130.18	860.006	226.935	Tongue-shaped	5110	5327	217	5206.29	1.87208	31.9586	30.0866	15.3797	14.7436	173.157	158.414	107.191	E	0.00211091	0.00263863	0.00316636
1088	Intact	D	12	92.503	29.7739	176671	2028.13	793.869	304.195	Tongue-shaped	5130	5330	200	5208.52	1.73826	46.3483	44.61	17.9279	0	359.061	359.061	220.114	SW	0.00224838	0.00281048	0.00337257
1089	Intact	T	11	92.5031	29.489	163363	2103.93	228.17	816.71	Lobate-shaped	5099	5238	139	5196.9	0.347755	30.9481	30.6003	13.3624	0	358.919	358.919	66.4584	NE	0.00204671	0.00255839	0.00307007
1090	Intact	T	10	92.5033	29.5008	83741.8	1264.68	223.943	464.629	Lobate-shaped	5205	5295	90	5238.26	3.10741	45.4877	42.3803	19.7333	26.5651	135	108.435	85.4114	E	0.000917917	0.0011474	0.00137687
1091	Intact	T	11	92.5034	29.5736	103486	1476.15	501.141	290.425	Tongue-shaped	5277	5362	85	5314.85	0.695485	26.617	25.9215	13.9133	0	359.256	359.256	234.055	SW	0.0011834	0.00147925	0.0017751
1092	Intact	T	10	92.5035	29.3413	138899	1576.25	560.551	254.122	Tongue-shaped	5042	5284	242	5154.95	5.6428	38.6786	33.0357	23.0856	30.6186	124.875	94.2567	82.0817	E	0.00168466	0.00210583	0.00252699
1093	Intact	T	12	92.5039	29.3882	61514.6	1078.24	359.793	264.452	Tongue-shaped	4780	4993	213	4845.62	10.035	52.8393	42.8043	27.2411	3.81407	359.81	355.996	239.562	SW	0.000633937	0.000792421	0.000950905
1094	Intact	T	12	92.504	29.4764	270652	3034.46	1281.05	319.897	Tongue-shaped	5049	5338	289	5141.8	1.39077	42.8951	41.5043	14.8449	3.01279	357.357	354.345	82.3879	E	0.00375116	0.00468895	0.00562674
1095	Intact	D	11	92.5045	29.6213	69752.9	1343.44	527.738	180.709	Tongue-shaped	5306	5398	92	5336.17	2.64657	36.4835	33.8369	17.6373	0	349.992	349.992	91.857	E	0.000737135	0.000921419	0.0011057
1096	Intact	T	10	92.5053	29.6297	8385.22	402.028	82.6437	146.139	Lobate-shaped	5222	5251	29	5238.22	11.7966	24.6667	12.8701	16.3032	3.50353	356.76	353.257	295.161	NW	5.80082e-05	7.25103e-05	8.70124e-05
1097	Intact	D	10	92.5057	29.8032	96933	2047.03	724.286	244.248	Tongue-shaped	5059	5240	181	5139.03	2.64657	31.0642	28.4176	13.9513	0	359.132	359.132	258.758	W	0.00109405	0.00136757	0.00164108
1098	Intact	D	10	92.5058	29.6724	73082.3	1413.59	540.851	237.274	Tongue-shaped	5340	5521	181	5398.86	0.347755	41.3505	41.0028	16.4391	7.59464	358.152	350.558	97.8255	E	0.000779555	0.000974444	0.00116933
1099	Intact	D	13	92.5058	29.5185	49276.2	871.405	257.798	219.237	Tongue-shaped	5254	5319	65	5280.15	2.33155	20.9163	18.5847	11.0394	15.9454	114.55	98.6051	46.3254	NE	0.000485777	0.000607222	0.000728666
1100	Intact	T	10	92.5058	29.3388	54055	976.477	156.921	389.097	Lobate-shaped	5004	5056	52	5030.1	1.47509	32.3057	30.8306	17.1355	57.2648	180	122.735	97.9934	E	0.000542844	0.000678555	0.000814266
1101	Intact	T	10	92.5058	29.3364	65333	1030.99	384.022	200.027	Tongue-shaped	4982	5171	189	5058.43	6.65914	44.2283	37.5692	25.5675	53.427	137.862	84.4354	92.0624	E	0.000681447	0.000851808	0.00102217
1102	Intact	T	9	92.5059	29.6769	25997.9	629.837	141.879	212.224	Lobate-shaped	5297	5334	37	5316.52	5.68495	22.7603	17.0753	12.4004	24.444	90	65.556	53.0568	NE	0.000225527	0.000281908	0.00033829
1103	Intact	D	11	92.5061	29.7965	412716	3189.73	421.913	979.596	Lobate-shaped	5081	5279	198	5156.12	0.347755	37.5366	37.1889	11.6397	0	359.256	359.256	181.439	S	0.00622378	0.00777973	0.00933567
1104	Intact	T	10	92.5061	29.5918	34771.5	806.795	125.229	273.945	Lobate-shaped	5261	5310	49	5277.74	2.80149	30.7462	27.9447	12.6412	38.6598	307.875	269.215	132.82	SE	0.000319699	0.000399623	0.000479548
1105	Intact	T	11	92.5061	29.7221	215055	2283.68	493.184	331.297	Tongue-shaped	5192	5274	82	5241.97	0.347755	26.4154	26.0677	11.3536	0	359.17	359.17	236.92	SW	0.00284664	0.0035583	0.00426995
1106	Intact	T	11	92.5062	29.5902	25862.4	620.039	181.515	144.532	Tongue-shaped	5268	5342	74	5305.1	10.0754	29.5056	19.4303	21.3641	0	356.424	356.424	241.684	SW	0.000224117	0.000280147	0.000336176
1107	Intact	T	11	92.5066	29.7793	118374	2000.82	586.055	330.373	Tongue-shaped	5072	5315	243	5136.61	2.80149	41.4817	38.6802	18.3128	0	357.969	357.969	253.318	W	0.00139053	0.00173816	0.0020858
1108	Intact	T	11	92.5073	29.5024	160046	2080.06	198.927	828.588	Lobate-shaped	5197	5308	111	5246.89	4.83224	36.9454	32.1132	18.2793	181.736	292.068	110.332	246.437	SW	0.00199694	0.00249618	0.00299541
1109	Intact	T	10	92.5079	29.5906	39793.8	871.939	305.422	141.855	Tongue-shaped	5265	5387	122	5323.9	10.9179	42.0245	31.1067	23.1475	1.39718	357.833	356.436	281.988	W	0.000375881	0.000469851	0.000563822
1110	Intact	T	11	92.5081	29.7749	62759.7	1173.79	146.852	463.701	Lobate-shaped	5244	5353	109	5301.83	2.45752	29.3523	26.8948	16.2789	0	351.027	351.027	273.702	W	0.000649365	0.000811707	0.000974048
1111	Intact	D	10	92.5082	29.7373	144429	1590.85	300.471	593.8	Lobate-shaped	5245	5429	184	5315.26	0.491794	44.6708	44.179	23.6293	0	357.138	357.138	198.447	S	0.00176545	0.00220682	0.00264818
1112	Intact	T	11	92.5082	29.4985	63560.6	1151.1	229.189	372.116	Lobate-shaped	5213	5311	98	5251.42	6.72127	44.1977	37.4764	21.6295	222.474	313.755	91.2808	257.978	W	0.000659322	0.000824153	0.000988984
1113	Intact	T	11	92.5083	29.3066	46954.3	1028.19	358.574	221.309	Tongue-shaped	4732	4866	134	4779.44	1.47509	36.3566	34.8815	18.3125	232.595	335.225	102.63	289.262	W	0.00045844	0.00057305	0.00068766
1114	Intact	T	11	92.5085	29.6844	121919	1756.08	242.896	709.695	Lobate-shaped	5296	5385	89	5340.59	1.25366	32.3806	31.1269	13.6416	31.7595	212.574	180.815	122.592	SE	0.00144066	0.00180082	0.00216098
1115	Intact	T	11	92.5089	29.5148	227507	2107.53	328.943	795.595	Lobate-shaped	5227	5352	125	5288.72	0.491794	41.2855	40.7937	17.6264	5.65948	336.448	330.788	53.368	NE	0.00304555	0.00380694	0.00456833
1116	Intact	T	11	92.509	29.5768	92200	1650.26	166.288	733.433	Lobate-shaped	5326	5401	75	5362.25	1.87208	24.4604	22.5884	13.1903	1.21887	358.668	357.449	285.953	W	0.00103027	0.00128783	0.0015454
1117	Intact	D	10	92.509	29.7606	58653.3	1368.67	142.808	580.31	Lobate-shaped	5217	5315	98	5269.64	2.11438	27.4073	25.2929	16.5061	7.49586	92.2906	84.7948	51.2573	NE	0.00059872	0.0007484	0.00089808
1118	Intact	T	9	92.5096	29.6772	76999.8	1142.63	376.964	222.163	Tongue-shaped	5240	5308	68	5277.98	2.02692	26.441	24.414	10.5487	0	355.236	355.236	76.1606	E	0.000829966	0.00103746	0.00124495
1119	Intact	T	11	92.5098	29.2901	49358.8	1010.23	424.621	144.779	Tongue-shaped	4847	5012	165	4921.57	10.618	41.1327	30.5147	26.1173	0	359.683	359.683	248.996	W	0.000486755	0.000608444	0.000730133
1120	Intact	T	11	92.5099	29.3006	52558.9	996.822	386.599	138.995	Tongue-shaped	4844	4994	150	4911.15	9.02632	34.3607	25.3344	22.0396	4.63546	357.357	352.722	317.065	NW	0.000524865	0.000656081	0.000787298
1121	Intact	D	10	92.51	29.7415	319755	2418.81	762.804	461.7	Tongue-shaped	5158	5318	160	5245.61	0.491794	34.988	34.4962	11.466	1.27303	357.51	356.237	130.099	SE	0.00458198	0.00572747	0.00687297
1122	Intact	D	11	92.51	29.6691	132914	1809.41	728.998	211.035	Tongue-shaped	5254	5341	87	5298.99	0.491794	28.1398	27.648	10.2104	0	351.87	351.87	157.282	SE	0.00159793	0.00199741	0.0023969
1123	Intact	T	10	92.5101	29.6864	50846	1139.83	152.447	430.876	Lobate-shaped	5331	5438	107	5369.28	5.42701	32.6584	27.2314	14.6716	116.565	262.147	145.582	195.851	S	0.000504406	0.000630508	0.00075661
1124	Intact	T	11	92.5102	29.3421	460497	3684.09	522.498	1591.85	Lobate-shaped	5052	5418	366	5199.02	0.347755	38.4593	38.1115	16.5584	28.6105	342.408	313.797	248.078	W	0.00709814	0.00887267	0.0106472
1125	Intact	D	12	92.5108	29.7628	218720	2582.63	1025.3	349.557	Tongue-shaped	5161	5322	161	5236.84	0.491794	25.027	24.5352	10.2286	0	358.152	358.152	123.059	SE	0.00290494	0.00363118	0.00435742
1126	Intact	D	12	92.5109	29.6019	57174.2	1140.99	183.872	487.707	Lobate-shaped	5388	5529	141	5434.12	1.77267	48.3734	46.6008	19.4194	0.855097	356.987	356.132	107.338	E	0.000580648	0.00072581	0.000870972
1127	Intact	T	11	92.5109	29.4183	95398.5	1899.08	134.091	811.077	Lobate-shaped	4914	5043	129	4981.65	1.55485	27.062	25.5071	14.1094	2.48955	356.309	353.819	245.844	SW	0.0010733	0.00134163	0.00160995
1128	Intact	T	11	92.511	29.5904	23055	768.71	100.309	329.262	Lobate-shaped	5327	5406	79	5361.19	8.15196	34.6846	26.5326	19.6858	211.945	337.479	125.535	272.226	W	0.000195249	0.000244062	0.000292874
1129	Intact	D	12	92.5111	29.3508	191096	1957.8	321.946	757.853	Lobate-shaped	5166	5325	159	5226.67	1.73826	42.166	40.4278	21.0448	3.81407	358.781	354.967	258.85	W	0.00247045	0.00308806	0.00370567
1130	Intact	T	11	92.5113	29.4108	104734	1453.85	506.306	254.432	Tongue-shaped	5101	5276	175	5171.67	5.2819	46.3367	41.0548	21.9714	1.63658	116.565	114.928	54.4608	NE	0.00120054	0.00150068	0.00180081
1131	Intact	T	11	92.5115	29.7191	42035.2	1210.87	141.712	354.963	Lobate-shaped	5254	5282	28	5268.08	1.73826	24.6001	22.8619	9.49828	0	356.186	356.186	169.587	S	0.000401428	0.000501786	0.000602143
1132	Intact	T	10	92.5116	29.407	59593.5	1094.3	382.549	155.86	Tongue-shaped	5186	5393	207	5262.96	11.209	50.4977	39.2887	27.1441	0	69.2571	69.2571	44.3692	NE	0.000610255	0.000762818	0.000915382
1133	Intact	T	11	92.5119	29.4131	50988.8	944.848	196.684	332.908	Lobate-shaped	5029	5113	84	5076.09	1.25366	26.1179	24.8643	15.9684	3.2397	348.69	345.45	279.537	W	0.000506107	0.000632633	0.00075916
1134	Relict	T	14	92.512	29.4876	242033	2292.2	352.218	683.716	Lobate-shaped	4971	5175	204	5060.43	4.18015	44.8904	40.7103	19.7979	23.0456	130.236	107.191	71.8825	E
1135	Intact	T	10	92.5121	29.6047	34674.2	915.834	146.099	338.403	Lobate-shaped	5345	5419	74	5379.21	2.22563	27.0407	24.815	15.1612	4.18492	355.236	351.051	123.799	SE	0.000318625	0.000398282	0.000477938
1136	Intact	D	12	92.5121	29.3549	169514	1665.22	592.19	310.184	Tongue-shaped	5196	5443	247	5312.89	2.02692	45.7704	43.7435	21.8927	130.236	321.843	191.606	251.619	W	0.00213953	0.00267442	0.0032093
1137	Intact	D	11	92.5125	29.75	359620	3279.75	1383.21	206.371	Tongue-shaped	5098	5408	310	5260.1	0.695485	42.7166	42.0211	15.2463	0	358.898	358.898	138.319	SE	0.00527577	0.00659471	0.00791365
1138	Intact	T	10	92.5126	29.7972	71630.7	1270.48	453.024	212.953	Tongue-shaped	5154	5251	97	5220.08	0.983516	23.3481	22.3646	10.7315	2.8624	338.07	335.208	238.179	SW	0.000761012	0.000951265	0.00114152
1139	Intact	T	10	92.5128	29.405	170134	1934.08	586.931	279.658	Tongue-shaped	5206	5434	228	5298.77	0.491794	51.1607	50.6689	25.2347	0	359.061	359.061	94.6624	E	0.00214893	0.00268616	0.00322339
1140	Intact	D	13	92.513	29.8304	244755	2902.39	1159.39	297.778	Tongue-shaped	4975	5299	324	5115.83	1.25366	34.8048	33.5511	16.5693	0	355.786	355.786	289.904	W	0.00332468	0.00415585	0.00498702
1141	Intact	T	13	92.5131	29.5125	43203.6	899.627	360.234	138.944	Tongue-shaped	5262	5396	134	5316.15	0.983516	37.0891	36.1055	19.967	0	324.462	324.462	45.1161	NE	0.000414855	0.000518569	0.000622282
1142	Intact	T	10	92.5132	29.4097	27088.1	635.699	203.112	147.462	Tongue-shaped	5107	5201	94	5153.56	10.5907	32.4824	21.8916	22.7401	9.24611	348.486	339.24	290.507	W	0.000236922	0.000296153	0.000355384
1143	Intact	T	10	92.5135	29.3259	62230.3	973.298	333.396	205.948	Tongue-shaped	4886	4952	66	4910.75	1.39077	33.2633	31.8725	14.6106	0	348.69	348.69	231.607	SW	0.000642799	0.000803498	0.000964198
1144	Intact	T	11	92.5141	29.3278	53079.6	891.588	320.704	182.04	Tongue-shaped	4869	4999	130	4923.45	8.20951	40.1123	31.9028	23.4593	183.289	329.621	146.332	269.723	W	0.000531112	0.00066389	0.000796668
1145	Intact	T	10	92.5145	29.4074	73138	1187.24	179.526	486.269	Lobate-shaped	5166	5256	90	5218.88	0.491794	33.3855	32.8937	16.4337	1.78991	348.69	346.9	266.465	W	0.000780269	0.000975336	0.0011704
1146	Intact	T	10	92.5149	29.6845	55401.2	939.73	365.661	156.475	Tongue-shaped	5259	5319	60	5289.46	2.77989	23.8492	21.0693	14.9061	186.483	320.711	134.228	241.717	SW	0.000559108	0.000698884	0.000838661
1147	Intact	D	12	92.5149	29.5053	199973	2244.04	624.243	319.275	Tongue-shaped	5233	5455	222	5332.18	2.02692	41.7408	39.7138	17.7362	28.0725	240.524	212.452	92.3093	E	0.00260879	0.00326099	0.00391319
1148	Intact	T	11	92.5149	29.3303	128467	1428.75	366.8	364.229	Tongue-shaped	4890	5068	178	4969.37	3.20284	47.43	44.2271	22.2058	57.5288	306.055	248.526	258.211	W	0.00153399	0.00191749	0.00230099
1149	Intact	D	13	92.515	29.7817	368573	3110.87	1194.88	297.928	Tongue-shaped	5036	5316	280	5175.67	0.347755	42.5153	42.1676	15.3841	0	359.37	359.37	181.114	S	0.00543376	0.00679219	0.00815063
1150	Intact	T	10	92.5152	29.7633	45861.1	895.075	140.283	337.056	Lobate-shaped	5171	5207	36	5192.47	4.39024	20.9163	16.5261	13.5629	0.658542	358.409	357.75	258.348	W	0.000445662	0.000557078	0.000668493
1151	Intact	T	11	92.5157	29.5694	91394.5	1943.4	781.432	251.682	Tongue-shaped	5364	5568	204	5428.08	2.64657	44.8899	42.2433	22.4193	30.6646	193.393	162.728	128.652	SE	0.00101948	0.00127434	0.00152921
1152	Intact	D	11	92.516	29.2665	547172	3553.68	1300.36	315.927	Tongue-shaped	4682	5118	436	4939.29	1.09958	48.4086	47.309	19.8313	0	359.474	359.474	163.125	S	0.00873014	0.0109127	0.0130952
1153	Intact	T	10	92.5161	29.4022	133887	1513.68	383.641	504.523	Lobate-shaped	5251	5332	81	5301.95	0.491794	33.8337	33.3419	11.0406	0	355.314	355.314	259.624	W	0.00161197	0.00201496	0.00241795
1154	Intact	T	12	92.5162	29.6812	119328	1518.25	422.395	367.503	Tongue-shaped	5192	5283	91	5241.23	2.50613	29.4206	26.9145	13.701	4.89909	344.055	339.156	189.04	S	0.00140399	0.00175499	0.00210598
1155	Intact	D	12	92.5163	29.7189	363142	2830.27	1173.68	410.377	Tongue-shaped	5244	5459	215	5289.12	0.695485	46.0892	45.3937	17.4671	0	359.687	359.687	192.673	S	0.00533782	0.00667228	0.00800673
1156	Intact	T	11	92.5166	29.2857	181625	1728.54	533.859	296.357	Tongue-shaped	5025	5138	113	5080.29	1.55485	38.6882	37.1333	14.1499	0	359.665	359.665	217.822	SW	0.00232426	0.00290532	0.00348639
1157	Intact	T	10	92.517	29.6737	73978	1263.55	270.571	384.476	Lobate-shaped	5187	5254	67	5228.1	1.55485	22.726	21.1712	11.9507	10.008	354.806	344.798	86.9626	E	0.000791035	0.000988794	0.00118655
1158	Intact	T	11	92.5172	29.5134	82374.9	1337.36	213.496	521.83	Lobate-shaped	5225	5270	45	5252.2	2.19835	21.4281	19.2297	12.3049	0	359.293	359.293	189.521	S	0.000899967	0.00112496	0.00134995
1159	Intact	T	10	92.5177	29.3087	21899.2	626.254	220.899	123.054	Tongue-shaped	4901	4995	94	4949.36	18.7977	38.6898	19.8921	29.3624	264.936	349.992	85.0556	322.957	NW	0.000183564	0.000229455	0.000275345
1160	Intact	D	11	92.5182	29.7477	62465.6	1157.96	414.018	150.863	Tongue-shaped	5046	5151	105	5098.34	3.10741	29.9694	26.862	15.7005	3.36646	357.51	354.144	144.537	SE	0.000645716	0.000807145	0.000968574
1161	Intact	T	10	92.5182	29.5665	142987	1528.69	386.03	359.309	Tongue-shaped	5284	5398	114	5344.03	4.18015	39.6383	35.4582	16.3575	19.5367	149.826	130.29	76.3916	E	0.00174433	0.00218041	0.0026165
1162	Intact	D	10	92.5183	29.7345	426451	3335.57	1079.71	444.189	Tongue-shaped	5184	5424	240	5288.1	1.09958	44.7531	43.6536	13.8053	0	359.542	359.542	132.722	SE	0.00647314	0.00809143	0.00970971
1163	Relict	D	13	92.5183	29.4973	163016	2063.14	762.378	200.514	Tongue-shaped	5195	5370	175	5278.39	1.04316	37.0597	36.0166	14.8095	11.3099	355.236	343.926	106.504	E
1164	Intact	T	10	92.5186	29.6797	30632.6	678.61	193.33	168.177	Tongue-shaped	5176	5243	67	5210.45	2.71406	34.7463	32.0323	18.7056	95.1944	250.241	155.046	192.648	S	0.000274595	0.000343244	0.000411893
1165	Intact	T	10	92.5186	29.5029	63557.7	1077.56	335.963	194.486	Tongue-shaped	5215	5317	102	5259.92	5.55752	43.356	37.7985	14.7452	28.8108	130.03	101.219	66.8408	NE	0.000659286	0.000824108	0.000988929
1166	Intact	D	11	92.5189	29.8322	129744	1919.74	770.638	245.45	Tongue-shaped	5089	5254	165	5170.63	0.777566	33.121	32.3434	14.1368	0	358.409	358.409	220.582	SW	0.00155231	0.00194039	0.00232847
1167	Intact	D	12	92.5189	29.3015	105327	1342.77	504.373	233.292	Tongue-shaped	4968	5176	208	5088.89	10.0523	35.9583	25.906	24.0732	228.053	313.668	85.6149	263.6	W	0.0012087	0.00151088	0.00181306
1168	Intact	T	11	92.5192	29.417	116404	1514.56	552.215	218.571	Tongue-shaped	5054	5439	385	5220.58	10.2182	51.3597	41.1415	32.4954	223.636	306.107	82.4714	271.936	W	0.00136281	0.00170351	0.00204421
1169	Intact	D	13	92.5194	29.8101	529109	4179.76	1707.35	314.298	Tongue-shaped	4918	5252	334	5121.52	0.347755	32.4327	32.085	13.5678	0	359.444	359.444	164.914	S	0.00838546	0.0104818	0.0125782
1170	Intact	T	10	92.5195	29.7692	89806.3	1265.07	449.337	196.17	Tongue-shaped	5090	5152	62	5113.03	1.09958	22.1652	21.0656	8.89299	0	358.831	358.831	186.787	S	0.000998253	0.00124782	0.00149738
1171	Intact	D	12	92.5195	29.7988	135683	1739.9	637.097	218.945	Tongue-shaped	5219	5358	139	5272.03	1.87208	45.078	43.2059	16.4679	1.08092	359.061	357.98	243.582	SW	0.00163796	0.00204745	0.00245694
1172	Intact	T	11	92.5195	29.6264	47303.5	1040.05	401.115	151.722	Tongue-shaped	5000	5214	214	5098.02	13.7973	38.0223	24.225	27.1423	225	270.855	45.8551	255.258	W	0.000462535	0.000578168	0.000693802
1173	Intact	T	10	92.5196	29.6233	25198.7	791.966	325.137	73.7247	Tongue-shaped	5007	5159	152	5086.42	18.867	34.9099	16.0429	25.8488	245.772	298.379	52.607	264.063	W	0.000217233	0.000271542	0.00032585
1174	Intact	D	13	92.5196	29.6158	130872	2039.68	815.077	181.429	Tongue-shaped	5066	5464	398	5259.15	8.68913	47.8507	39.1615	26.1339	34.2869	130.486	96.1991	79.2394	E	0.00156851	0.00196064	0.00235276
1175	Intact	T	10	92.5198	29.5369	151832	1868.59	269.265	636.905	Lobate-shaped	5248	5357	109	5300.93	3.42096	35.0486	31.6277	17.7525	131.634	288.435	156.801	218.91	SW	0.0018746	0.00234325	0.0028119
1176	Intact	D	11	92.5198	29.3718	135172	2097.26	906.171	158.432	Tongue-shaped	5075	5463	388	5237.86	4.5248	45.0212	40.4964	23.1192	2.08256	350.538	348.455	61.7473	NE	0.00163057	0.00203821	0.00244585
1177	Intact	D	14	92.5199	29.4668	371710	3730.15	1747.59	261.596	Tongue-shaped	4774	5203	429	4988.43	1.09958	39.4911	38.3915	15.7098	0	359.256	359.256	272.927	W	0.00548931	0.00686164	0.00823396
1178	Intact	T	11	92.52	29.5954	126016	2205.6	937.453	243.335	Tongue-shaped	5181	5453	272	5299.92	5.29321	41.5659	36.2727	19.7425	20.2249	130.03	109.805	65.4446	NE	0.00149894	0.00187368	0.00224841
1179	Intact	T	9	92.5203	29.6714	95338.8	1362.7	235.574	504.205	Lobate-shaped	5125	5217	92	5179.21	4.41748	30.6357	26.2182	16.4058	3.01279	100.176	97.1627	61.318	NE	0.0010725	0.00134062	0.00160875
1180	Intact	T	9	92.5204	29.6781	11342.7	397.795	109.536	111.257	Lobate-shaped	5177	5214	37	5194.42	5.54676	27.3687	21.822	20.015	219.958	258.69	38.7325	237.537	SW	8.3355e-05	0.000104194	0.000125033
1181	Intact	D	12	92.5209	29.4556	420048	4930.45	2139.39	192.492	Tongue-shaped	4718	5351	633	5125.58	1.77267	50.3554	48.5828	19.8193	0	359.433	359.433	269.841	W	0.00635669	0.00794586	0.00953503
1182	Intact	D	12	92.5212	29.7061	295422	2636.74	871.072	370.612	Tongue-shaped	5275	5537	262	5381.89	0.347755	51.5377	51.19	19.3659	23.1986	341.565	318.366	156.799	SE	0.0041668	0.00520851	0.00625021
1183	Intact	D	14	92.5212	29.4781	596653	5089.09	1783.46	613.695	Tongue-shaped	4737	5249	512	4967	0.983516	49.6032	48.6197	17.6899	0	358.727	358.727	263.756	W	0.00968587	0.0121073	0.0145288
1184	Intact	D	11	92.5213	29.3893	181390	2274.01	961.271	144.166	Tongue-shaped	5191	5455	264	5330.59	2.19835	49.0748	46.8765	21.5542	0	358.512	358.512	248.449	W	0.00232064	0.0029008	0.00348096
1185	Intact	D	12	92.5214	29.7616	149141	1550.36	562.621	278.143	Tongue-shaped	5222	5366	144	5290.21	0.983516	45.7449	44.7614	15.4089	0	358.531	358.531	104.496	E	0.0018348	0.0022935	0.0027522
1186	Intact	T	10	92.5214	29.6218	22284.3	719.144	266.396	57.4855	Tongue-shaped	5088	5230	142	5154.15	16.6701	45.8844	29.2144	28.5778	226.38	267.581	41.2001	248.846	W	0.000187444	0.000234305	0.000281165
1187	Intact	T	11	92.5218	29.2854	173214	1741.17	632.688	417.14	Tongue-shaped	5043	5203	160	5137.13	1.43355	32.8959	31.4623	17.1064	176.987	357.769	180.782	297.226	NW	0.00219569	0.00274461	0.00329354
1188	Intact	T	13	92.5219	29.6	52157.4	1168.23	470.099	107.838	Tongue-shaped	5147	5391	244	5249.08	12.7684	41.2032	28.4348	26.9395	245.376	281.31	35.9335	261.706	W	0.000520058	0.000650073	0.000780087
1189	Intact	T	10	92.522	29.501	72820.7	1349	153.423	575.326	Lobate-shaped	5165	5252	87	5208.31	1.77267	32.0739	30.3012	12.8026	0	356.424	356.424	80.0697	E	0.000776208	0.00097026	0.00116431
1190	Intact	D	12	92.5223	29.4055	534386	3585.31	1432.31	368.701	Tongue-shaped	5174	5434	260	5285.63	0.491794	49.8216	49.3298	16.2518	0	359.119	359.119	169.075	S	0.00848592	0.0106074	0.0127289
1191	Intact	T	12	92.5227	29.6168	38567.3	1250.44	525.812	143.977	Tongue-shaped	5041	5347	306	5154.29	8.30211	45.5711	37.269	29.531	208.072	280.408	72.3352	253.189	W	0.000362022	0.000452528	0.000543033
1192	Intact	T	11	92.523	29.6049	24985.8	793.427	81.4615	311.021	Lobate-shaped	5137	5192	55	5165.57	6.05077	34.6846	28.6338	25.097	245.709	299.745	54.0358	266.452	W	0.000215033	0.000268791	0.000322549
1193	Intact	T	10	92.523	29.2893	28923.9	688.311	166.081	219.633	Lobate-shaped	4993	5043	50	5016.24	10.3085	33.9689	23.6604	20.4378	287.319	344.954	57.6347	319.659	NW	0.000256319	0.000320398	0.000384478
1194	Intact	T	12	92.5231	29.4821	106094	1495.91	519.28	200.477	Tongue-shaped	4801	5018	217	4864.78	2.11438	45.392	43.2776	21.4766	0	357.709	357.709	261.361	W	0.00121927	0.00152409	0.00182891
1195	Intact	T	9	92.5234	29.6681	49999.8	910.803	255.998	240.106	Tongue-shaped	5111	5228	117	5147.08	2.53008	46.8639	44.3338	20.0343	1.84761	119.055	117.207	56.5437	NE	0.00049435	0.000617937	0.000741525
1196	Intact	D	10	92.5236	29.7243	19400.3	671.247	150.557	239.7	Lobate-shaped	5306	5337	31	5322.78	2.98883	39.2574	36.2686	14.5936	31.6755	358.332	326.656	129.443	SE	0.000158724	0.000198405	0.000238086
1197	Intact	T	10	92.524	29.5756	37026	815.245	145.665	332.704	Lobate-shaped	5388	5495	107	5427.47	7.09888	36.3175	29.2186	21.391	153.435	260.754	107.319	213.682	SW	0.000344731	0.000430914	0.000517097
1198	Intact	D	11	92.5242	29.6834	79359	1421.71	624.025	186.443	Tongue-shaped	5329	5538	209	5386.65	2.22563	48.9818	46.7562	20.0138	92.153	223.746	131.593	167.307	S	0.000860573	0.00107572	0.00129086
1199	Intact	T	10	92.5243	29.351	81146.8	1476.52	217.32	588.195	Lobate-shaped	5377	5485	108	5423	1.09958	33.381	32.2814	13.9229	75.9638	201.615	125.651	145.03	SE	0.000883891	0.00110486	0.00132584
1200	Intact	T	11	92.5246	29.4844	108064	1285.81	437.977	349.003	Tongue-shaped	4803	5002	199	4863.98	2.53008	53.4893	50.9592	22.4529	1.68468	353.66	351.975	252.808	W	0.0012465	0.00155812	0.00186975
1201	Intact	D	10	92.5247	29.8365	61575.8	1115.3	446.342	140.454	Tongue-shaped	5233	5388	155	5313.26	4.34904	35.6785	31.3295	20.7327	207.181	348.835	141.654	279.958	W	0.000634695	0.000793369	0.000952042
1202	Relict	T	10	92.5247	29.5136	217488	2074.04	444.123	542.671	Lobate-shaped	5057	5267	210	5174.37	3.88212	34.2456	30.3635	17.7119	2.1211	346.43	344.308	47.5127	NE
1203	Intact	T	10	92.5252	29.3463	135286	2535.33	1202.74	155.344	Tongue-shaped	5207	5546	339	5350.74	2.45752	41.4683	39.0108	17.9177	39.2894	210.379	171.09	119.776	SE	0.00163221	0.00204026	0.00244831
1204	Intact	D	10	92.5252	29.4231	22652.4	613.995	156.407	146.686	Tongue-shaped	5074	5186	112	5131.23	23.7711	37.4327	13.6616	31.8917	45.5509	71.565	26.0141	56.6071	NE	0.000191166	0.000238957	0.000286748
1205	Intact	T	10	92.5252	29.6121	12440.7	468.545	147.542	85.9489	Tongue-shaped	5183	5245	62	5209.88	13.8458	41.4636	27.6178	25.2311	259.346	297.719	38.3724	277.269	W	9.31289e-05	0.000116411	0.000139693
1206	Intact	D	11	92.5255	29.2637	281892	2336.69	803.406	277.335	Tongue-shaped	4939	5237	298	5078.25	0.491794	46.9124	46.4206	18.6856	0	359.236	359.236	170.704	S	0.00393888	0.0049236	0.00590832
1207	Intact	D	13	92.5256	29.6766	297486	3061.34	1071.49	340.925	Tongue-shaped	5157	5355	198	5262.45	1.04316	29.5226	28.4794	12.2151	49.3987	341.565	292.166	192.783	S	0.00420177	0.00525221	0.00630265
1208	Intact	T	12	92.5262	29.3194	36323.2	775.983	212.243	278.847	Lobate-shaped	4933	5018	85	4970.17	9.72324	31.3167	21.5935	21.8426	2.96094	358.069	355.108	314.721	NW	0.000336894	0.000421117	0.000505341
1209	Relict	T	12	92.5263	29.5756	42366.9	891.78	185.379	356.867	Lobate-shaped	5445	5531	86	5486.9	6.19664	23.9149	17.7183	14.0711	135	285.488	150.488	228.453	SW
1210	Intact	T	11	92.5265	29.6141	30799.5	867.217	135.696	345.12	Lobate-shaped	5209	5328	119	5269.94	12.5492	37.94	25.3908	24.2865	268.995	323.13	54.1352	289.045	W	0.000276391	0.000345489	0.000414587
1211	Intact	D	11	92.5267	29.8004	104115	1431.02	469.895	216.062	Tongue-shaped	5159	5283	124	5225.88	2.08564	38.2749	36.1893	15.1474	2.41951	359.236	356.817	92.7814	E	0.00119204	0.00149005	0.00178805
1212	Intact	T	10	92.5272	29.2893	47274	887.133	333.118	205.247	Tongue-shaped	5089	5215	126	5130.5	3.47333	42.6424	39.169	19.3298	2.29061	359.045	356.755	172.151	S	0.000462189	0.000577737	0.000693284
1213	Intact	D	12	92.5272	29.3838	108935	1368.94	453.817	260.379	Tongue-shaped	5290	5397	107	5336.09	5.15586	38.5276	33.3717	16.8962	199.537	357.51	157.974	279.832	W	0.00125856	0.0015732	0.00188783
1214	Intact	D	12	92.5273	29.4229	30603.6	749.275	262.324	120.183	Tongue-shaped	5077	5149	72	5108.95	7.05703	27.1339	20.0769	18.1936	0	358.877	358.877	296.294	NW	0.000274283	0.000342854	0.000411425
1215	Intact	D	11	92.5275	29.7636	164449	1624.2	575.961	257.517	Tongue-shaped	5138	5237	99	5203.52	0	26.9122	26.9122	11.0979	-1	357.614	358.614	117.188	SE	0.00206305	0.00257881	0.00309458
1216	Intact	D	11	92.5284	29.7301	118049	2390.17	1098.68	182.81	Tongue-shaped	5128	5328	200	5215.87	2.50613	36.4835	33.9773	14.3543	0	359.236	359.236	201.891	S	0.00138596	0.00173244	0.00207893
1217	Intact	T	10	92.5286	29.5743	20451.5	678.919	94.9236	293.982	Lobate-shaped	5474	5516	42	5493.21	7.05703	33.2858	26.2288	18.149	195.255	311.027	115.772	248.911	W	0.000169099	0.000211374	0.000253649
1218	Intact	T	10	92.529	29.8141	31056.3	845.079	155.571	362.402	Lobate-shaped	4943	5033	90	4989	6.35779	31.6079	25.2501	17.7596	2.72631	353.395	350.669	253.576	W	0.00027916	0.00034895	0.00041874
1219	Intact	T	10	92.5297	29.7666	34359.6	741.886	202.138	178.594	Tongue-shaped	5124	5179	55	5152.64	9.26277	26.8891	17.6263	16.8194	234.819	343.369	108.55	284.722	W	0.00031516	0.00039395	0.00047274
1220	Intact	T	11	92.53	29.5252	18123	507.977	148.169	123.099	Tongue-shaped	5324	5411	87	5358.9	11.6454	46.4643	34.8189	25.8006	266.566	328.627	62.0606	301.501	NW	0.000146267	0.000182834	0.000219401
1221	Intact	T	11	92.5301	29.5929	13871.1	617.84	60.907	260.572	Lobate-shaped	5441	5486	45	5463	11.4069	26.0484	14.6414	21.7684	182.246	223.636	41.3903	198.401	S	0.000106122	0.000132653	0.000159184
1222	Intact	D	10	92.5302	29.5506	623047	5017.71	1568.35	604.28	Tongue-shaped	5139	5359	220	5241.83	0.347755	33.7684	33.4206	11.0117	0	358.025	358.025	157.426	SE	0.0102023	0.0127529	0.0153034
1223	Intact	T	11	92.5303	29.5797	17590.3	610.88	91.5788	201.159	Lobate-shaped	5416	5467	51	5437.05	14.0499	26.6102	12.5603	20.4705	80.9724	163.843	82.8703	120.003	SE	0.000141124	0.000176405	0.000211686
1224	Intact	D	12	92.5304	29.7623	80905.9	1225.94	378.72	207.938	Tongue-shaped	5196	5359	163	5274.47	3.69162	40.9998	37.3082	21.109	0.68206	358.55	357.868	267.49	W	0.000880742	0.00110093	0.00132111
1225	Intact	D	11	92.5307	29.2982	78808.1	1145.31	407.05	173.689	Tongue-shaped	5200	5354	154	5256.88	3.74016	47.7071	43.9669	22.7748	1.39718	355.365	353.967	269.147	W	0.000853409	0.00106676	0.00128011
1226	Intact	T	9	92.5308	29.2952	29693.8	653.085	227.42	133.833	Tongue-shaped	5277	5360	83	5321.57	10.1213	33.3363	23.215	23.1093	234.834	320.262	85.4288	272.43	W	0.000264528	0.00033066	0.000396792
1227	Intact	D	10	92.5311	29.2626	161049	1815.93	726.454	273.607	Tongue-shaped	4994	5208	214	5075.05	1.47509	37.8437	36.3686	18.4613	2.72631	359.091	356.364	79.1094	E	0.00201197	0.00251496	0.00301795
1228	Intact	T	14	92.5312	29.4919	113004	1495.37	509.712	239.009	Tongue-shaped	4831	5007	176	4904.76	1.73826	37.6288	35.8905	18.9163	6.34019	358.995	352.655	292.681	NW	0.00131518	0.00164398	0.00197277
1229	Intact	D	13	92.5313	29.4186	342990	3202.45	1443.49	351.212	Tongue-shaped	5136	5385	249	5271.58	0.695485	41.6953	40.9998	14.5901	0	357.709	357.709	100.315	E	0.00498436	0.00623046	0.00747655
1230	Intact	D	12	92.5315	29.8015	132830	1665.39	471.367	232.689	Tongue-shaped	5163	5314	151	5235.76	0	34.0378	34.0378	17.1255	-1	359.384	360.384	246.099	SW	0.00159671	0.00199589	0.00239507
1231	Intact	T	8	92.5318	29.239	94345.3	1603.77	187.983	661.182	Lobate-shaped	4682	4779	97	4727.93	0.347755	26.8027	26.455	13.2332	0	359.193	359.193	254.625	W	0.0010591	0.00132388	0.00158865
1232	Intact	T	11	92.5319	29.5287	123700	1956.76	157.736	845.557	Lobate-shaped	5309	5402	93	5359.6	0.491794	32.4162	31.9244	12.4567	0	351.87	351.87	262.28	W	0.00146594	0.00183242	0.0021989
1233	Intact	T	11	92.532	29.5917	29637.1	651.321	185.792	161.925	Tongue-shaped	5464	5592	128	5498.09	5.24783	59.9777	54.7298	29.1705	209.055	342.15	133.095	289.028	W	0.000263922	0.000329903	0.000395883
1234	Intact	T	10	92.5322	29.2304	117325	1514.84	516.202	265.211	Tongue-shaped	4875	5097	222	4952.22	2.98883	48.4234	45.4346	22.066	2.2026	358.727	356.524	97.0477	E	0.00137576	0.0017197	0.00206363
1235	Intact	D	11	92.5323	29.6146	117854	1537.96	594.204	185.095	Tongue-shaped	5333	5427	94	5383.15	1.47509	36.8339	35.3588	16.5106	0	357.93	357.93	244.923	SW	0.0013832	0.001729	0.0020748
1236	Intact	T	11	92.5325	29.5927	12874.6	461.315	88.4831	173.598	Lobate-shaped	5479	5526	47	5500.12	11.1782	33.7302	22.552	23.1022	199.699	263.191	63.4923	227.075	SW	9.704e-05	0.0001213	0.00014556
1237	Intact	D	11	92.5329	29.5528	314217	2848.57	1063.86	429.563	Tongue-shaped	5091	5390	299	5188.35	0.347755	52.0686	51.7208	16.8006	0	359.63	359.63	173.056	S	0.00448692	0.00560865	0.00673038
1238	Intact	D	10	92.5329	29.3488	57543.8	1008.82	375.957	154.725	Tongue-shaped	5283	5464	181	5343.7	2.80149	43.3779	40.5764	24.5308	164.745	311.634	146.889	263.939	W	0.000585155	0.000731444	0.000877732
1239	Intact	D	12	92.533	29.3792	137834	1880.36	672.385	186.788	Tongue-shaped	5279	5513	234	5387.7	2.71406	53.8834	51.1694	24.1821	0.489695	358.216	357.727	252.693	W	0.00166917	0.00208646	0.00250375
1240	Intact	T	10	92.5333	29.2917	30746.4	751.51	225.593	122.846	Tongue-shaped	5284	5381	97	5310.39	10.3701	54.3016	43.9315	23.6056	212.905	283.736	70.831	249.381	W	0.00027582	0.000344775	0.00041373
1241	Intact	D	12	92.5334	29.4599	112628	1397.11	268.983	516.115	Lobate-shaped	5179	5266	87	5235.2	0.777566	35.8051	35.0275	16.4314	0	359.61	359.61	251.28	W	0.00130993	0.00163741	0.00196489
1242	Intact	T	12	92.5334	29.3244	87989	1226.82	457.055	224.222	Tongue-shaped	4918	5115	197	4991.9	0.777566	48.084	47.3064	24.5954	0	359.31	359.31	252.609	W	0.000974062	0.00121758	0.00146109
1243	Intact	D	11	92.5335	29.2578	128084	1481.03	521.605	288.695	Tongue-shaped	5083	5221	138	5132.11	1.09958	31.1052	30.0057	14.7097	0.95484	356.257	355.302	100.46	E	0.0015285	0.00191063	0.00229275
1244	Intact	D	11	92.5335	29.7237	956332	4575.65	1843.8	587.183	Tongue-shaped	5092	5457	365	5255.32	0.777566	62.2259	61.4484	15.277	0	359.341	359.341	138.641	SE	0.0170609	0.0213262	0.0255914
1245	Intact	T	14	92.5335	29.7771	46038.9	1013.07	419.46	138.241	Tongue-shaped	4843	4945	102	4888.48	6.65022	37.7298	31.0796	14.5366	10.008	355.236	345.228	97.0072	E	0.000447736	0.00055967	0.000671604
1246	Intact	T	11	92.5337	29.4659	33999.9	935.704	136.867	370.242	Lobate-shaped	5200	5296	96	5246.88	3.69162	37.0704	33.3788	19.7293	93.8141	288.435	194.621	183.311	S	0.000311204	0.000389005	0.000466806
1247	Intact	D	10	92.5337	29.3518	44782.1	822.163	240.01	223.221	Tongue-shaped	5321	5432	111	5369.08	6.3858	37.0944	30.7086	23.7706	175.601	260.119	84.5173	225.175	SW	0.00043311	0.000541388	0.000649665
1248	Intact	D	11	92.5347	29.2551	77789.9	1329.66	531.327	135.131	Tongue-shaped	5116	5233	117	5184.14	2.94823	39.3247	36.3764	19.7576	0	349.824	349.824	109.138	E	0.000840195	0.00105024	0.00126029
1249	Intact	T	13	92.5352	29.6015	30352.4	1047.02	82.1387	460.768	Lobate-shaped	5451	5518	67	5476.32	9.3755	31.1807	21.8052	21.2729	113.791	191.659	77.8685	160.123	S	0.000271584	0.00033948	0.000407376
1250	Intact	D	11	92.5354	29.4082	283503	2562.14	813.717	303.953	Tongue-shaped	5187	5404	217	5301.46	0.347755	42.36	42.0123	16.4282	0	358.831	358.831	92.4554	E	0.0039659	0.00495738	0.00594885
1251	Intact	T	10	92.5354	29.3952	28449.5	624.026	160.546	210.015	Lobate-shaped	5314	5346	32	5326.09	1.47509	32.6444	31.1693	12.546	0	356.424	356.424	134.2	SE	0.000251283	0.000314103	0.000376924
1252	Intact	T	10	92.5356	29.4623	40240.9	814.969	157.13	315.015	Lobate-shaped	5192	5278	86	5219.69	6.23494	43.8904	37.6555	21.7495	267.207	336.801	69.5941	301.446	NW	0.000380955	0.000476194	0.000571433
1253	Intact	T	14	92.5358	29.7777	67740.4	1179.97	350.807	221.877	Tongue-shaped	4762	4969	207	4860.23	3.10741	44.3663	41.2589	22.9381	2.1211	359.588	357.467	249.411	W	0.000711688	0.00088961	0.00106753
1254	Intact	T	11	92.5359	29.468	25494.6	699.586	118.82	230.675	Lobate-shaped	5289	5335	46	5309.79	2.64657	22.3331	19.6866	13.1517	52.5946	231.34	178.746	158.021	S	0.000220298	0.000275373	0.000330448
1255	Intact	D	10	92.5361	29.2948	60713.2	1090.7	311.869	242.528	Tongue-shaped	5238	5366	128	5297.73	6.89557	43.6335	36.7379	22.2591	14.3814	132.614	118.233	65.8948	NE	0.000624039	0.000780049	0.000936059
1256	Intact	D	10	92.5365	29.2532	26188.4	687.037	155.973	237.139	Lobate-shaped	5193	5278	85	5223.62	4.39024	45.9985	41.6083	19.9197	256.535	353.48	96.9454	302.614	NW	0.000227512	0.00028439	0.000341268
1257	Intact	T	11	92.5372	29.23	95378.6	1482.41	617.413	160.629	Tongue-shaped	4919	5141	222	5023.65	2.80149	45.6575	42.856	21.8853	1.36393	358.603	357.239	210.444	SW	0.00107303	0.00134129	0.00160955
1258	Intact	T	11	92.5374	29.5949	25195.5	608.785	135.351	202.14	Lobate-shaped	5389	5471	82	5413.63	6.3858	54.161	47.7753	28.325	7.38604	355.601	348.215	90.3157	E	0.0002172	0.0002715	0.000325799
1259	Intact	T	11	92.5375	29.491	49997.4	915.054	335.318	165.87	Tongue-shaped	4951	5033	82	4989.31	5.96148	30.9338	24.9723	17.1753	2.7927	357.99	355.198	156.135	SE	0.000494321	0.000617902	0.000741482
1260	Intact	T	10	92.5376	29.4708	43090.3	1047.53	114.797	432.708	Lobate-shaped	5310	5360	50	5340.25	2.80149	34.2679	31.4664	13.614	79.6952	198.435	118.74	140.912	SE	0.00041355	0.000516937	0.000620325
1261	Intact	T	10	92.5381	29.3964	52671.3	935.349	281.438	199.576	Tongue-shaped	5251	5321	70	5293.33	2.11438	30.0885	27.9741	15.3349	0	358.877	358.877	118.938	SE	0.000526212	0.000657765	0.000789318
1262	Intact	T	10	92.5382	29.3872	128959	1649.43	272.656	580.539	Lobate-shaped	5242	5395	153	5310.4	7.00646	42.6993	35.6929	25.1283	5.8696	107.676	101.807	50.9393	NE	0.00154105	0.00192631	0.00231157
1263	Intact	D	11	92.5385	29.2575	159494	1838.98	426.516	439.92	Lobate-shaped	5095	5232	137	5140.98	1.09958	47.83	46.7304	17.1457	0	358.386	358.386	194.972	S	0.00198869	0.00248586	0.00298303
1264	Intact	D	11	92.5386	29.4213	219331	2685.04	1173.81	227.217	Tongue-shaped	4789	5249	460	5063.54	1.43355	48.5894	47.1558	22.5242	1.97493	354.289	352.314	69.3083	E	0.00291469	0.00364337	0.00437204
1265	Intact	T	11	92.539	29.4664	90233.9	1309.11	248.653	388.421	Lobate-shaped	5251	5386	135	5320.38	2.45752	53.5359	51.0784	19.7118	151.39	323.13	171.741	254.202	W	0.00100396	0.00125495	0.00150594
1266	Intact	T	10	92.5392	29.6215	18613	716.111	78.0044	288.513	Lobate-shaped	5567	5605	38	5588.7	14.7517	27.1094	12.3577	20.6178	235.244	279.605	44.3611	254.82	W	0.000151026	0.000188783	0.00022654
1267	Intact	D	12	92.5393	29.4631	58923.6	1115.67	475.992	147.686	Tongue-shaped	5250	5375	125	5324.07	4.62959	37.7937	33.1641	19.4733	1.44412	359.542	358.098	286.497	W	0.000602032	0.00075254	0.000903048
1268	Intact	T	11	92.5395	29.594	26849.8	660.74	145.098	213.57	Lobate-shaped	5366	5424	58	5395.97	6.998	54.2664	47.2684	26.2373	3.57633	102.848	99.2714	39.9734	NE	0.000234424	0.00029303	0.000351636
1269	Intact	D	11	92.5396	29.8078	49994.7	936.492	262.991	230.814	Tongue-shaped	5152	5214	62	5189.69	4.19449	25.3631	21.1687	13.812	9.24611	352.648	343.402	60.8667	NE	0.000494289	0.000617862	0.000741434
1270	Intact	T	10	92.5396	29.219	77091.6	1262.22	444.798	198.61	Tongue-shaped	5114	5299	185	5220.98	8.81635	38.3194	29.503	24.2513	44.2559	170.538	126.282	85.7121	E	0.000831153	0.00103894	0.00124673
1271	Intact	T	10	92.5397	29.5812	67518	1100.74	329.796	260.914	Tongue-shaped	5284	5334	50	5311.43	2.22563	24.7651	22.5395	10.9734	25.4633	210.303	184.839	116.844	SE	0.000708885	0.000886107	0.00106333
1272	Intact	T	10	92.5397	29.4111	64707.3	1402.2	129.903	532.072	Lobate-shaped	5047	5243	196	5169.33	1.09958	37.6297	36.5301	19.0603	0	359.37	359.37	78.9353	E	0.000673622	0.000842027	0.00101043
1273	Intact	T	10	92.5397	29.2059	75734.9	1508.03	191.832	635.327	Lobate-shaped	4760	4916	156	4833.82	3.43851	38.4723	35.0338	19.431	0	358.452	358.452	215.96	SW	0.000813631	0.00101704	0.00122045
1274	Intact	T	8	92.5398	29.236	130417	1952.46	189.635	864.784	Lobate-shaped	4759	4851	92	4808.97	2.80149	24.9377	22.1362	14.479	0	358.958	358.958	140.484	SE	0.00156197	0.00195247	0.00234296
1275	Intact	D	11	92.5398	29.4731	44474.7	931.566	300.758	219.762	Tongue-shaped	5345	5424	79	5388.49	2.80149	31.67	28.8685	18.057	136.637	241.39	104.753	189.994	S	0.000429545	0.000536931	0.000644317
1276	Intact	D	10	92.54	29.2928	168550	1826.44	502.002	449.361	Tongue-shaped	5140	5404	264	5242.85	3.74016	47.4171	43.6769	23.1	5.90614	180	174.094	59.8579	NE	0.00212494	0.00265618	0.00318742
1277	Intact	T	13	92.5402	29.5863	95864.6	1443.01	543.329	156.654	Tongue-shaped	5320	5400	80	5355.36	2.22563	21.29	19.0643	10.7039	13.3925	348.232	334.839	175.217	S	0.0010796	0.0013495	0.0016194
1278	Intact	T	11	92.5405	29.4692	45113.7	858.491	174.197	317.548	Lobate-shaped	5323	5425	102	5362.02	1.55485	46.4133	44.8585	23.4555	237.265	327.995	90.7299	282.477	W	0.000436961	0.000546201	0.000655441
1279	Intact	T	10	92.5407	29.5782	81561.1	1493.47	201.604	622.585	Lobate-shaped	5282	5381	99	5317.73	5.15586	32.7573	27.6014	15.744	0	359.275	359.275	238.198	SW	0.000889308	0.00111163	0.00133396
1280	Intact	T	12	92.541	29.4531	139817	2077.51	210.085	918.291	Lobate-shaped	5099	5255	156	5187.27	0.347755	38.4308	38.083	15.6403	27.4744	354.472	326.998	225.6	SW	0.00169803	0.00212254	0.00254704
1281	Intact	D	9	92.5414	29.2888	30909.8	673.998	239.412	163.72	Tongue-shaped	5245	5321	76	5282.38	12.6571	41.0668	28.4096	22.4819	4.3987	359.421	355.023	105.698	E	0.00027758	0.000346975	0.00041637
1282	Intact	D	11	92.5415	29.7097	177339	2003.42	794.309	208.021	Tongue-shaped	5033	5128	95	5090.08	1.09958	27.578	26.4784	8.96412	0	356.878	356.878	96.6871	E	0.0022586	0.00282325	0.00338789
1283	Intact	T	13	92.5418	29.5424	145770	1650.31	382.414	502.257	Lobate-shaped	5381	5590	209	5459.07	3.14593	49.1749	46.029	21.7356	92.7263	288.435	195.709	193.226	S	0.00178515	0.00223143	0.00267772
1284	Intact	T	11	92.5418	29.5831	87627.9	1676.88	723.61	146.417	Tongue-shaped	5261	5381	120	5329.61	0.983516	41.6344	40.6508	13.8168	0	351.87	351.87	122.003	SE	0.000969266	0.00121158	0.0014539
1285	Intact	T	10	92.5419	29.2681	72863.9	1234.44	460.002	165.609	Tongue-shaped	4991	5123	132	5048.32	0.491794	42.9905	42.4987	20.2211	0	357.049	357.049	166.96	S	0.000776762	0.000970952	0.00116514
1286	Intact	T	9	92.5426	29.5937	22979.4	651.083	101.066	265.564	Lobate-shaped	5355	5384	29	5368.89	2.22563	14.1959	11.9703	8.17774	20.556	358.958	338.402	94.4181	E	0.000194482	0.000243102	0.000291722
1287	Intact	T	11	92.5426	29.2726	105121	1282.37	331.315	486.695	Lobate-shaped	4884	4977	93	4918.06	1.09958	41.5285	40.429	15.1821	1.00509	355.601	354.596	296.48	NW	0.00120586	0.00150733	0.00180879
1288	Intact	T	10	92.5429	29.4905	53636.9	918.217	200.939	362.929	Lobate-shaped	4971	5074	103	5022.51	7.65216	42.071	34.4188	27.4461	213.69	262.619	48.9293	231.826	SW	0.00053781	0.000672263	0.000806716
1289	Intact	T	12	92.5435	29.5815	16598.3	686.321	56.7911	280.171	Lobate-shaped	5207	5287	80	5240.42	14.1684	23.6563	9.48789	18.3949	77.8557	142.431	64.5757	115.03	SE	0.000131629	0.000164536	0.000197443
1290	Intact	D	12	92.5437	29.6313	70788.4	1454.76	624.284	154.773	Tongue-shaped	5347	5492	145	5401.55	1.73826	31.4692	29.731	15.8329	1.59114	356.82	355.229	141.017	SE	0.000750286	0.000937858	0.00112543
1291	Intact	T	11	92.5437	29.4653	27206.6	697.004	146.557	243.21	Lobate-shaped	5341	5393	52	5368.88	10.459	36.6633	26.2043	19.4639	59.3227	127.674	68.3509	93.4028	E	0.000238167	0.000297709	0.000357251
1292	Intact	T	11	92.5438	29.4596	22015.2	589.109	215.387	121.197	Tongue-shaped	5326	5391	65	5351.43	3.20284	45.9003	42.6975	21.2068	174.289	318.366	144.077	253.935	W	0.000184731	0.000230914	0.000277097
1293	Intact	T	9	92.5438	29.2262	53544	894.741	321.991	192.988	Tongue-shaped	4937	5056	119	4989.33	8.05754	48.0556	39.9981	21.4011	38.5169	128.956	90.439	88.3407	E	0.000536692	0.000670865	0.000805038
1294	Intact	T	11	92.5439	29.2419	33868.1	769.594	124.326	288.276	Lobate-shaped	4940	5010	70	4984.4	1.73826	41.6138	39.8755	17.2282	45	349.695	304.695	288.936	W	0.000309757	0.000387197	0.000464636
1295	Intact	T	11	92.5439	29.4678	14918.9	545.085	89.0944	229.154	Lobate-shaped	5377	5427	50	5398.5	22.5015	37.8742	15.3727	32.1871	80.9229	125.388	44.4649	104.638	E	0.000115813	0.000144766	0.00017372
1296	Intact	T	13	92.5439	29.4851	58883.7	1142.84	404.198	203.518	Tongue-shaped	5023	5142	119	5084.97	8.20951	30.2958	22.0863	18.9016	10.1543	358.995	348.841	40.7632	NE	0.000601543	0.000751928	0.000902314
1297	Relict	T	11	92.5444	29.7707	61162.6	1424.78	633.37	98.6763	Tongue-shaped	4904	5196	292	5051.25	17.1374	45.6217	28.4843	25.5924	48.2519	109.885	61.6332	77.2543	E
1298	Intact	T	10	92.5446	29.2168	63808.3	1055.58	390.066	187.064	Tongue-shaped	5061	5144	83	5110.73	3.47333	27.4889	24.0155	13.7378	3.81407	355.101	351.287	102.802	E	0.000662407	0.000828009	0.000993611
1299	Intact	T	10	92.5451	29.5935	42697.5	869.116	241.123	185.659	Tongue-shaped	5347	5376	29	5361.89	1.77267	25.7049	23.9322	9.43578	0	358.264	358.264	219.937	SW	0.00040903	0.000511288	0.000613546
1300	Intact	T	11	92.5452	29.2735	56413	928.18	286.208	205.072	Tongue-shaped	4884	5034	150	4940.66	8.96779	51.1527	42.1849	25.9003	5.71059	359.454	353.744	299.205	NW	0.000571384	0.000714229	0.000857075
1301	Intact	D	12	92.5454	29.683	30332.4	1049.69	454.375	92.0066	Tongue-shaped	5204	5374	170	5286.49	11.3262	30.5564	19.2302	21.7247	170.166	264.289	94.123	209.642	SW	0.00027137	0.000339212	0.000407054
1302	Intact	T	12	92.5454	29.4842	22745.8	568.809	144.162	188.496	Lobate-shaped	5038	5082	44	5059.48	10.6722	25.7954	15.1232	18.2859	10.6849	54.4623	43.7774	34.5924	NE	0.000192112	0.00024014	0.000288167
1303	Intact	T	11	92.5458	29.5381	39848.1	857.691	161.671	330.544	Lobate-shaped	5351	5430	79	5391.78	15.1864	33.4089	18.2225	26.2044	219.872	266.186	46.3141	249.696	W	0.000376497	0.000470622	0.000564746
1304	Intact	T	10	92.5459	29.2177	40408.8	997.892	403.466	93.4649	Tongue-shaped	5065	5175	110	5110.96	3.88212	37.4153	33.5331	20.434	0	353.29	353.29	293.372	NW	0.000382863	0.000478579	0.000574295
1305	Intact	T	9	92.546	29.6807	25914.3	706.045	131.797	273.066	Lobate-shaped	5125	5200	75	5162.58	14.5362	28.8604	14.3242	21.7251	165.964	214.509	48.5448	197.53	S	0.000224657	0.000280821	0.000336985
1306	Intact	T	10	92.5461	29.5796	41554.9	864.645	128.005	330.977	Lobate-shaped	5133	5230	97	5183.32	7.44872	46.4176	38.9689	28.4007	6.14663	69.8205	63.6739	40.9012	NE	0.00039593	0.000494913	0.000593895
1307	Intact	T	11	92.5462	29.463	75411.4	1183.17	227.224	445.727	Lobate-shaped	5256	5362	106	5320.9	3.12673	41.3613	38.2346	20.1316	35.2933	125.134	89.8408	71.4057	E	0.000809462	0.00101183	0.00121419
1308	Intact	T	11	92.5462	29.533	7929.8	366.81	68.732	123.234	Lobate-shaped	5336	5351	15	5343.89	11.1679	25.4737	14.3057	19.3881	254.745	287.403	32.6578	272.137	W	5.42484e-05	6.78105e-05	8.13726e-05
1309	Intact	T	11	92.5463	29.5353	22829	578.026	114.004	200.104	Lobate-shaped	5337	5391	54	5363.96	8.31626	29.8038	21.4875	20.5345	208.496	274.764	66.268	245.083	SW	0.000192956	0.000241195	0.000289434
1310	Intact	T	11	92.5463	29.534	6072.49	309.162	66.3427	87.9213	Lobate-shaped	5336	5347	11	5340	5.48177	24.7424	19.2607	16.3499	226.909	302.905	75.9961	269.955	W	3.93834e-05	4.92292e-05	5.90751e-05
1311	Intact	T	10	92.5464	29.2023	88538.5	1316.59	300.267	472.163	Lobate-shaped	4901	4993	92	4947.22	3.20284	31.299	28.0962	13.2115	1.50743	356.987	355.48	274.107	W	0.000981366	0.00122671	0.00147205
1312	Intact	T	10	92.5466	29.557	294777	2515.32	365.252	791.437	Lobate-shaped	5005	5181	176	5095.62	0	47.148	47.148	16.2088	-1	358.831	359.831	114.115	SE	0.0041559	0.00519487	0.00623385
1313	Intact	T	11	92.5469	29.2435	58214.2	1032.5	154.111	379.099	Lobate-shaped	4987	5038	51	5021.3	0.491794	16.7988	16.307	9.31299	0	351.87	351.87	232.604	SW	0.000593344	0.000741681	0.000890017
1314	Intact	T	11	92.547	29.2332	90428.4	1306.61	514.867	240.991	Tongue-shaped	4844	5018	174	4913.32	1.73826	37.7187	35.9804	19.2779	13.2405	315	301.759	242.503	SW	0.00100656	0.0012582	0.00150984
1315	Intact	T	10	92.5472	29.2742	50286.6	859.891	308.065	178.54	Tongue-shaped	4890	5034	144	4944.64	8.30211	49.8424	41.5403	24.9214	4.18492	357.274	353.089	329.899	NW	0.000497755	0.000622194	0.000746633
1316	Intact	T	10	92.5474	29.3844	157320	1571.02	446.134	340.692	Tongue-shaped	4946	5118	172	5009.91	0.695485	42.8101	42.1146	23.9128	8.97263	304.695	295.723	82.4558	E	0.0019562	0.00244525	0.0029343
1317	Intact	T	11	92.5476	29.2195	55559.6	1125.03	242.595	237.421	Tongue-shaped	5041	5199	158	5081.67	4.86928	49.9104	45.0411	22.6404	0	358.452	358.452	313.132	NW	0.000561027	0.000701284	0.000841541
1318	Intact	T	10	92.5477	29.3493	46108.2	882.524	187.736	207.569	Lobate-shaped	5204	5249	45	5228.04	1.43355	26.2079	24.7744	11.4471	119.055	270	150.945	204.98	SW	0.000448546	0.000560682	0.000672819
1319	Intact	T	11	92.5478	29.5968	52943.5	1271.26	506.825	104.836	Tongue-shaped	5296	5380	84	5333.32	3.47333	24.0634	20.5901	13.426	0	358.152	358.152	240.289	SW	0.000529477	0.000661847	0.000794216
1320	Intact	D	10	92.5484	29.7273	57430.5	1090.99	400.002	204.215	Tongue-shaped	5114	5276	162	5175.63	11.4069	36.7179	25.311	22.4754	2.17474	105.255	103.08	59.3555	NE	0.000583773	0.000729716	0.000875659
1321	Intact	T	9	92.5484	29.5959	35927	1138.05	483.539	98.7419	Tongue-shaped	5307	5384	77	5349.68	2.22563	24.8554	22.6297	13.9011	8.29714	358.264	349.967	123.734	SE	0.000332489	0.000415612	0.000498734
1322	Intact	T	11	92.5487	29.4609	29524.9	717.623	215.145	174.844	Tongue-shaped	5220	5331	111	5266.97	21.6433	45.0848	23.4415	32.4397	43.2816	89.1697	45.888	61.7756	NE	0.000262723	0.000328404	0.000394085
1323	Intact	T	12	92.5487	29.613	57322	1306.27	435.408	203.969	Tongue-shaped	5237	5305	68	5269.8	3.10741	29.0705	25.9631	13.3428	5.19443	359.145	353.95	170.03	S	0.00058245	0.000728062	0.000873675
1324	Intact	T	11	92.5491	29.3529	101946	1775.2	737.933	186.581	Tongue-shaped	5272	5468	196	5360.91	4.04879	42.125	38.0762	19.6587	115.641	272.437	156.796	224.5	SW	0.0011623	0.00145287	0.00174345
1325	Intact	T	11	92.5492	29.3507	63059.9	1303.17	442.123	146.243	Tongue-shaped	5238	5342	104	5283.84	4.51153	25.8308	21.3193	13.7843	146.07	295.906	149.836	217.491	SW	0.000653095	0.000816369	0.000979643
1326	Intact	T	11	92.5496	29.22	48304.9	918.807	342.726	168.43	Tongue-shaped	5054	5232	178	5146.4	3.83539	52.312	48.4766	29.0185	221.309	338.749	117.441	290.933	W	0.00047431	0.000592887	0.000711465
1327	Intact	D	10	92.5499	29.692	24590.3	695.135	114.525	285.669	Lobate-shaped	5257	5290	33	5275.2	2.22563	24.5237	22.2981	12.6044	6.34019	135	128.66	45.856	NE	0.000210955	0.000263694	0.000316432
1328	Intact	D	11	92.5499	29.5273	88368	1690.2	664.763	133.518	Tongue-shaped	5235	5351	116	5299.21	4.18015	26.664	22.4839	12.4363	126.87	338.199	211.329	266.157	W	0.000979099	0.00122387	0.00146865
1329	Intact	T	11	92.55	29.595	91807.5	1199.26	440.477	246.944	Tongue-shaped	5258	5368	110	5328.26	1.43355	31.4692	30.0357	15.7993	8.1301	358.958	350.828	105.812	E	0.00102501	0.00128126	0.00153751
1330	Intact	T	11	92.55	29.8269	91523.2	1767.29	678.374	172.528	Tongue-shaped	4683	5044	361	4846.99	4.16576	41.3451	37.1793	25.4243	0.838414	358.152	357.314	280.622	W	0.0010212	0.0012765	0.0015318
1331	Intact	T	11	92.55	29.2233	73700.9	1100.07	314.598	371.486	Lobate-shaped	5030	5202	172	5104.11	4.19449	53.5755	49.3811	28.626	216.027	354.806	138.778	298.665	NW	0.000787481	0.000984351	0.00118122
1332	Intact	T	11	92.5501	29.2485	138841	1760.15	238.415	736.447	Lobate-shaped	5071	5216	145	5144.72	2.80149	50.8973	48.0959	19.0666	0	357.274	357.274	270.143	W	0.00168381	0.00210476	0.00252571
1333	Intact	T	12	92.5504	29.6141	71984.5	1139.29	293.204	256.824	Tongue-shaped	5232	5293	61	5249.47	0.347755	46.5123	46.1646	11.5751	0	356.987	356.987	249.007	W	0.000765525	0.000956907	0.00114829
1334	Intact	D	12	92.5511	29.7981	42407.4	1513.21	715.737	84.1967	Tongue-shaped	5043	5307	264	5173.33	5.54676	33.8608	28.3141	22.1023	198.435	264.401	65.9657	227.364	SW	0.000405697	0.000507122	0.000608546
1335	Intact	T	11	92.5511	29.244	69512.1	1339.05	129.236	561.675	Lobate-shaped	5031	5176	145	5132.46	3.27718	37.335	34.0578	18.3111	6.84277	347.005	340.163	284.157	W	0.000734082	0.000917603	0.00110112
1336	Intact	T	10	92.5513	29.2258	97309.9	1276.41	415.441	211.824	Tongue-shaped	4992	5172	180	5068.6	4.65541	51.7509	47.0955	24.9091	15.9454	357.709	341.764	305.991	NW	0.00109916	0.00137395	0.00164874
1337	Intact	T	10	92.5514	29.5402	37735.1	763.769	181.508	255.046	Lobate-shaped	5352	5457	105	5397.2	16.8244	47.8661	31.0417	27.181	3.78448	55.4077	51.6232	28.0923	NE	0.000352668	0.000440835	0.000529003
1338	Intact	T	12	92.5516	29.6736	117751	1771.69	215.495	770.487	Lobate-shaped	4976	5105	129	5036.7	2.71406	36.0827	33.3687	16.1003	14.9314	297.897	282.966	73.9736	E	0.00138176	0.0017272	0.00207263
1339	Intact	D	11	92.5519	29.7024	394483	3524.25	1480.96	301.278	Tongue-shaped	5065	5450	385	5222.37	1.25366	46.5251	45.2714	16.893	0	359.275	359.275	146.11	SE	0.00589531	0.00736913	0.00884296
1340	Intact	D	11	92.5521	29.532	10122.4	534.962	228.089	76.0273	Tongue-shaped	5359	5396	37	5376.36	7.65216	18.7057	11.0535	13.7932	194.237	243.435	49.1977	214.701	SW	7.27129e-05	9.08911e-05	0.000109069
1341	Intact	D	10	92.5524	29.531	16871	599.612	229.741	96.8638	Tongue-shaped	5336	5397	61	5367.9	8.13028	27.9345	19.8042	16.7126	204.677	284.036	79.3594	240.695	SW	0.000134227	0.000167784	0.000201341
1342	Intact	T	10	92.5525	29.5477	131506	1438.61	329.531	561.348	Lobate-shaped	5080	5218	138	5138.64	2.11438	37.7962	35.6818	20.5389	6.78897	357.51	350.721	62.7752	NE	0.00157764	0.00197205	0.00236646
1343	Intact	T	11	92.5525	29.4576	124354	1703.67	202.533	741.472	Lobate-shaped	5099	5269	170	5184.06	7.1983	42.263	35.0648	27.5383	21.5014	110.726	89.2241	59.2629	NE	0.00147525	0.00184406	0.00221287
1344	Intact	D	11	92.5529	29.4521	14622.6	488.396	101.223	148.261	Lobate-shaped	5335	5360	25	5345.71	5.80952	35.2122	29.4026	14.275	9.29331	353.29	343.997	221.775	SW	0.000113058	0.000141323	0.000169587
1345	Intact	T	13	92.5534	29.6219	256147	2672.91	280.877	1022.49	Lobate-shaped	5127	5264	137	5200.79	0	37.6021	37.6021	12.8691	-1	358.264	359.264	213.339	SW	0.00351124	0.00438904	0.00526685
1346	Intact	T	11	92.5534	29.5718	126001	1341.5	442.86	314.124	Tongue-shaped	4938	5136	198	5036.45	7.46458	36.5782	29.1136	25.0289	257.645	333.712	76.0671	288.527	W	0.00149872	0.0018734	0.00224808
1347	Intact	D	12	92.5536	29.5243	81431.5	1656.47	739.564	124.389	Tongue-shaped	5313	5493	180	5366.58	2.64657	36.6815	34.0349	18.0187	68.1986	317.603	249.404	198.221	S	0.000887613	0.00110952	0.00133142
1348	Intact	D	11	92.5538	29.8134	73264.1	1411.46	187.359	527.882	Lobate-shaped	5043	5158	115	5106.1	1.43355	32.7108	31.2772	13.0763	4.08562	358.363	354.278	277.862	W	0.000781883	0.000977354	0.00117282
1349	Intact	T	10	92.5539	29.3327	33776.2	734.42	144.002	244.754	Lobate-shaped	5150	5227	77	5183.82	7.05703	40.4593	33.4023	20.9524	2.57915	356.689	354.11	304.808	NW	0.000308749	0.000385936	0.000463123
1350	Intact	D	11	92.5546	29.8151	34684.3	829.713	240.624	130.234	Tongue-shaped	5051	5194	143	5100.33	11.6601	43.1609	31.5008	24.75	229.927	303.288	73.3604	267.708	W	0.000318737	0.000398421	0.000478106
1351	Intact	D	9	92.5553	29.5443	75072.2	1048.87	352.449	229.738	Tongue-shaped	5125	5236	111	5167	1.47509	34.5115	33.0364	19.0537	0	350.134	350.134	72.0295	E	0.000805096	0.00100637	0.00120764
1352	Intact	T	11	92.5557	29.473	55615.9	946.533	204.814	336.112	Lobate-shaped	5410	5481	71	5446.25	5.48177	38.7018	33.2201	19.9502	183.652	282.265	98.6125	232.488	SW	0.000561709	0.000702136	0.000842564
1353	Intact	T	11	92.5557	29.2526	28294.8	684.747	187.736	163.159	Tongue-shaped	5181	5281	100	5226.88	20.1046	43.5358	23.4311	30.7528	257.152	295.75	38.5982	274.413	W	0.000249643	0.000312054	0.000374465
1354	Intact	T	12	92.5562	29.457	155358	1932.11	274.721	760.758	Lobate-shaped	5096	5290	194	5158.85	0.695485	45.3643	44.6688	18.5604	32.9052	336.801	303.896	204.496	SW	0.00192696	0.00240869	0.00289043
1355	Intact	T	11	92.5563	29.6299	73519.5	1507.68	143.21	582.904	Lobate-shaped	5065	5147	82	5106.93	2.19835	36.6048	34.4064	20.3535	15.7512	352.185	336.434	269.763	W	0.000785155	0.000981444	0.00117773
1356	Intact	T	10	92.5564	29.281	165722	1744.42	295.115	673.216	Lobate-shaped	4932	5041	109	4982.13	0.777566	27.2558	26.4782	15.0797	0	358.727	358.727	296.084	NW	0.00208223	0.00260279	0.00312335
1357	Intact	T	11	92.5566	29.4711	16696	491.594	141.331	133.421	Tongue-shaped	5416	5454	38	5437.25	10.4091	30.3858	19.9767	19.1821	209.846	260.961	51.1146	238.989	SW	0.000132558	0.000165698	0.000198837
1358	Intact	T	10	92.5568	29.4678	9557.51	389.554	145.707	82.1201	Tongue-shaped	5386	5458	72	5414.91	15.3161	44.8936	29.5776	32.6426	237.804	276.259	38.4548	264.293	W	6.78713e-05	8.48391e-05	0.000101807
1359	Intact	T	11	92.5568	29.6134	31144.5	825.594	243.224	138.855	Tongue-shaped	5293	5372	79	5324.42	3.74016	43.8944	40.1542	16.0308	10.008	352.569	342.561	111.652	E	0.000280111	0.000350138	0.000420166
1360	Intact	D	11	92.5569	29.6081	65805.4	1086.3	364.057	195.438	Tongue-shaped	5334	5424	90	5386.51	1.47509	34.2011	32.726	14.1316	0	359.145	359.145	113.063	SE	0.000687363	0.000859204	0.00103104
1361	Intact	D	9	92.5572	29.5403	184600	2382.08	961.531	229.265	Tongue-shaped	5132	5536	404	5289.46	6.46906	40.5799	34.1108	25.936	2.41951	343.072	340.653	60.8742	NE	0.00237001	0.00296252	0.00355502
1362	Intact	D	10	92.5586	29.5427	199204	2212.63	899.51	247.945	Tongue-shaped	5128	5430	302	5237.17	0.777566	38.2749	37.4973	17.6192	0	357.879	357.879	280.996	W	0.00259675	0.00324594	0.00389512
1363	Intact	T	11	92.5592	29.6118	91451.9	1381.58	263.063	527.486	Lobate-shaped	5277	5341	64	5311.15	1.43355	28.546	27.1124	13.1242	0	356.76	356.76	231.191	SW	0.00102024	0.0012753	0.00153037
1364	Intact	T	9	92.5593	29.6325	87977.2	1187.1	282.351	358.812	Lobate-shaped	5016	5246	230	5121.79	11.0593	42.0071	30.9478	29.2035	0	359.673	359.673	156.798	SE	0.000973905	0.00121738	0.00146086
1365	Intact	D	10	92.5593	29.7894	47408.6	1475.21	643.539	129.197	Tongue-shaped	4729	4989	260	4841	7.88755	41.7454	33.8578	23.8016	122.905	268.21	145.305	198.277	S	0.000463769	0.000579711	0.000695653
1366	Intact	T	11	92.5598	29.423	138353	1588.05	492.628	270.009	Tongue-shaped	4705	4990	285	4829.36	7.79732	44.053	36.2557	26.7617	6.49935	83.264	76.7646	44.7375	NE	0.00167672	0.0020959	0.00251508
1367	Intact	T	11	92.56	29.6135	31689	744.081	245.489	146.629	Tongue-shaped	5276	5303	27	5291.03	2.86531	14.3633	11.498	8.62251	0	358.452	358.452	248	W	0.000285997	0.000357497	0.000428996
1368	Intact	D	13	92.5605	29.6867	354902	2660.72	1074.35	319.326	Tongue-shaped	5108	5374	266	5232.46	0.491794	44.2061	43.7143	15.6423	0	359.444	359.444	109.106	E	0.00519281	0.00649101	0.00778922
1369	Intact	T	10	92.5605	29.6235	121182	1754.08	210.123	617.331	Lobate-shaped	5108	5251	143	5179.51	1.39077	28.0984	26.7076	12.8467	3.36646	354.094	350.727	74.6279	E	0.0014302	0.00178775	0.0021453
1370	Intact	T	10	92.5609	29.3599	41820.5	854.253	334.766	148.013	Tongue-shaped	5315	5469	154	5387.96	12.5808	40.9236	28.3428	28.1364	152.199	214.624	62.4256	182.646	S	0.000398969	0.000498712	0.000598454
1371	Intact	D	12	92.5613	29.6924	438066	3832.03	1724.35	290.53	Tongue-shaped	5012	5286	274	5152.96	0.347755	24.2826	23.9348	10.5192	0	356.186	356.186	97.5841	E	0.00668529	0.00835661	0.0100279
1372	Intact	T	10	92.5616	29.4213	60933.9	994.794	332.999	221.337	Tongue-shaped	4719	4857	138	4787.52	13.1259	34.0378	20.9118	24.0377	4.76364	61.7984	57.0347	29.1378	NE	0.000626763	0.000783453	0.000940144
1373	Intact	T	10	92.5616	29.3761	28936.8	705.689	122.671	279.901	Lobate-shaped	5336	5401	65	5370.56	7.97672	41.064	33.0873	20.8465	188.13	297.35	109.22	221.974	SW	0.000256456	0.00032057	0.000384684
1374	Intact	D	11	92.5619	29.5314	67290	1161.18	204.861	427.617	Lobate-shaped	5366	5471	105	5414.17	4.29349	35.6863	31.3928	16.7017	0	279.162	279.162	164.49	S	0.000706014	0.000882517	0.00105902
1375	Intact	T	10	92.5628	29.5761	191483	2078.06	337.061	555.493	Lobate-shaped	5126	5220	94	5180.69	0.695485	27.4073	26.7118	11.6444	0	359.356	359.356	213.66	SW	0.00247645	0.00309557	0.00371468
1376	Intact	D	13	92.5629	29.5291	27034.4	856.531	287.794	81.439	Tongue-shaped	5357	5417	60	5393.41	1.73826	27.2897	25.5515	14.6265	35.5377	347.471	311.934	232.357	SW	0.000236359	0.000295449	0.000354538
1377	Intact	T	11	92.5637	29.2232	188023	2226.01	886.25	255.748	Tongue-shaped	4728	4998	270	4873.92	2.53008	37.9316	35.4015	17.0877	0	358.152	358.152	60.6796	NE	0.00242285	0.00302856	0.00363427
1378	Intact	T	11	92.5638	29.3905	151646	1502.1	478.296	308.708	Tongue-shaped	5298	5427	129	5356.71	2.33155	33.9862	31.6546	15.2985	17.9279	160.017	142.089	73.5945	E	0.00187184	0.0023398	0.00280776
1379	Intact	D	12	92.564	29.82	193371	2024.46	701.728	261.475	Tongue-shaped	5139	5255	116	5201.03	0.695485	37.5436	36.8481	14.4059	0	358.958	358.958	149.4	SE	0.00250578	0.00313222	0.00375866
1380	Intact	T	11	92.5642	29.4642	154749	1851.1	269.485	754.977	Lobate-shaped	5278	5393	115	5331.5	1.43355	35.8099	34.3763	13.9491	4.76364	353.157	348.394	102.622	E	0.00191789	0.00239737	0.00287684
1381	Intact	D	10	92.5658	29.3991	56068.6	1066.21	402.447	114.732	Tongue-shaped	5313	5484	171	5397.56	13.1987	46.9124	33.7137	24.0026	95.5993	191.547	95.9473	130.268	SE	0.0005672	0.000709	0.0008508
1382	Intact	T	10	92.5662	29.4605	22359.4	652.783	95.0825	235.463	Lobate-shaped	5278	5306	28	5291.68	7.33673	30.2027	22.8659	15.6568	0.60309	354.472	353.869	54.9964	NE	0.000188202	0.000235253	0.000282303
1383	Intact	D	11	92.5665	29.3967	58826.1	1040.54	364.469	150.342	Tongue-shaped	5306	5415	109	5356.26	2.02692	29.1587	27.1318	14.8836	9.6052	349.287	339.682	68.1093	E	0.000600837	0.000751046	0.000901255
1384	Intact	T	12	92.5677	29.5322	43975.7	928.422	266.289	171.423	Tongue-shaped	5442	5571	129	5487.67	7.61348	40.2145	32.601	20.647	74.4759	187.167	112.691	123.572	SE	0.000423768	0.00052971	0.000635652
1385	Intact	T	11	92.5678	29.5304	19874.3	598.957	128.342	187.78	Lobate-shaped	5416	5479	63	5442.84	13.4518	29.5691	16.1172	22.7136	85.7108	129.958	44.2467	104.649	E	0.000163389	0.000204237	0.000245084
1386	Intact	T	10	92.5682	29.4602	12992.3	457.089	74.6098	172.318	Lobate-shaped	5290	5313	23	5301.25	18.0711	29.9722	11.9011	22.5883	0.690276	358.698	358.008	223.309	SW	9.81056e-05	0.000122632	0.000147158
1387	Intact	D	11	92.5684	29.4049	182403	2004.75	792.723	289.835	Tongue-shaped	5110	5314	204	5201.19	0.983516	35.1481	34.1646	16.5486	0	359.236	359.236	86.1614	E	0.0023362	0.00292025	0.00350431
1388	Intact	T	10	92.5687	29.5088	55455.5	947.802	285.77	246.432	Tongue-shaped	5263	5353	90	5308.89	2.19835	39.0509	36.8526	20.9038	3.75173	357.955	354.203	68.7732	E	0.000559765	0.000699706	0.000839647
1389	Intact	T	10	92.5691	29.302	35135.4	703.269	229.735	209.024	Tongue-shaped	5172	5296	124	5227.02	6.46906	50.0025	43.5334	24.0633	185.44	326.31	140.87	264.815	W	0.000323718	0.000404647	0.000485577
1390	Intact	D	14	92.5696	29.5924	699838	5518.81	2329.9	622.122	Tongue-shaped	4832	5357	525	5101.28	0	46.6895	46.6895	18.4796	-1	359.31	360.31	232.165	SW	0.0117292	0.0146615	0.0175939
1391	Intact	T	11	92.5697	29.2847	87153.1	1368.26	196.903	590.719	Lobate-shaped	5051	5202	151	5126.03	8.81635	42.8273	34.0109	23.8152	1.1233	358.636	357.513	274.631	W	0.000962968	0.00120371	0.00144445
1392	Intact	T	10	92.5697	29.5071	20361.9	574.964	214.382	119.374	Tongue-shaped	5296	5383	87	5329.71	13.057	32.7433	19.6863	21.0262	36.5289	87.8789	51.3501	58.9751	NE	0.000168211	0.000210264	0.000252317
1393	Intact	T	10	92.5705	29.3077	96820.7	1172.49	317.958	339.705	Lobate-shaped	5200	5309	109	5253.61	2.02692	38.3571	36.3302	18.9689	220.601	325.784	105.183	268.12	W	0.00109253	0.00136567	0.0016388
1394	Intact	T	13	92.5708	29.5991	123083	1344.52	383.305	329.976	Tongue-shaped	4839	5019	180	4904.42	0.777566	43.1477	42.3702	24.6855	2.48955	358.452	355.962	300.578	NW	0.00145718	0.00182147	0.00218576
1395	Relict	T	8	92.5709	29.6682	35471.7	1017.27	416.264	75.0528	Tongue-shaped	4815	5049	234	4920.2	18.0886	50.6409	32.5523	31.7071	75.2564	129.857	54.6008	98.0643	E
1396	Intact	T	11	92.571	29.2435	52942.8	985.959	153.462	373.833	Lobate-shaped	4968	5022	54	4992.03	3.95876	39.1292	35.1704	15.1195	0	358.531	358.531	290.45	W	0.000529469	0.000661836	0.000794204
1397	Intact	T	11	92.5715	29.3799	88681.8	1234.51	456.098	241.839	Tongue-shaped	5020	5270	250	5127.6	19.0647	44.5062	25.4415	29.7058	22.6938	80.4104	57.7167	61.1104	NE	0.000983272	0.00122909	0.00147491
1398	Intact	T	10	92.5717	29.3982	55026.4	1000.62	187.924	321.189	Lobate-shaped	5164	5251	87	5207.55	5.76831	32.2615	26.4932	18.6516	1.08092	91.5911	90.5102	35.0279	NE	0.000554572	0.000693215	0.000831859
1399	Intact	D	14	92.5721	29.6876	342722	4265.17	1911.45	182.807	Tongue-shaped	4725	5278	553	5062.14	0.491794	47.9842	47.4924	16.6124	0	359.293	359.293	83.618	E	0.00497969	0.00622462	0.00746954
1400	Intact	T	10	92.5723	29.3337	17459.7	540.083	197.215	93.1195	Tongue-shaped	5195	5264	69	5225.9	7.27193	39.6413	32.3694	26.6144	1.27303	359.265	357.992	220.371	SW	0.000139867	0.000174834	0.000209801
1401	Intact	T	11	92.5728	29.5302	56569.5	1167.57	177.189	485.389	Lobate-shaped	5365	5432	67	5397.15	1.47509	36.1431	34.668	19.296	0	333.435	333.435	232.761	SW	0.000573286	0.000716607	0.000859929
1402	Intact	D	12	92.5732	29.3603	96732.6	1464.67	581.648	193.522	Tongue-shaped	5182	5390	208	5293.44	2.71406	47.2221	44.508	21.662	182.911	298.496	115.585	216.45	SW	0.00109134	0.00136417	0.00163701
1403	Intact	T	12	92.5733	29.5134	99778	1238.81	333.356	341.333	Lobate-shaped	5099	5250	151	5156.87	1.43355	49.3083	47.8748	21.6626	214.114	310.236	96.1219	257.75	W	0.0011327	0.00141587	0.00169905
1404	Intact	D	11	92.5734	29.5682	355299	2379.88	728.335	557.747	Tongue-shaped	5220	5337	117	5260.89	1.04316	43.0726	42.0295	16.3233	0	358.264	358.264	172.808	S	0.00519979	0.00649973	0.00779968
1405	Intact	D	12	92.5736	29.8172	148779	1908.71	733.907	174.035	Tongue-shaped	5111	5285	174	5200.02	4.51153	35.3889	30.8773	14.8135	0	357.879	357.879	90.6277	E	0.00182946	0.00228683	0.0027442
1406	Intact	T	11	92.5738	29.6015	112614	1505.3	318.995	385.331	Lobate-shaped	4831	5017	186	4895.92	0.777566	46.7287	45.9512	22.8065	4.08562	356.532	352.446	295.941	NW	0.00130974	0.00163717	0.0019646
1407	Relict	T	10	92.5738	29.672	39195.8	1258.06	547.563	112.084	Tongue-shaped	4791	5043	252	4890.24	4.56438	44.4849	39.9205	25.2924	65.6376	152.745	87.1071	94.5842	E
1408	Intact	D	14	92.574	29.4347	398008	4424.23	2032.81	119.16	Tongue-shaped	4938	5383	445	5224.08	0.347755	44.8238	44.4761	15.0956	0	359.215	359.215	259.331	W	0.00595858	0.00744823	0.00893787
1409	Intact	D	12	92.5742	29.5176	147129	2092.19	926.21	329.133	Tongue-shaped	5107	5296	189	5184.26	1.77267	32.8302	31.0575	11.5638	31.6075	354.806	323.198	268.983	W	0.00180514	0.00225642	0.00270771
1410	Intact	D	12	92.5744	29.3739	231602	1875.36	683.357	363.623	Tongue-shaped	5055	5294	239	5177.93	3.62587	45.7379	42.112	23.5637	0.507028	359.502	358.995	171.496	S	0.00311146	0.00388932	0.00466719
1411	Intact	T	11	92.5745	29.5111	52889.6	1156.89	466.956	173.999	Tongue-shaped	5117	5363	246	5194.58	10.7637	43.8173	33.0536	24.9546	239.638	315	75.3617	265.487	W	0.00052883	0.000661038	0.000793246
1412	Intact	T	10	92.5747	29.4761	9194.05	429.823	55.2643	171.451	Lobate-shaped	5382	5408	26	5393.09	8.30211	25.7049	17.4028	16.7255	28.0725	79.3302	51.2577	55.9446	NE	6.47859e-05	8.09824e-05	9.71789e-05
1413	Intact	T	10	92.5747	29.5271	27281.1	650.474	142.58	220.078	Lobate-shaped	5331	5396	65	5366.91	10.96	36.162	25.202	23.6018	185.389	235.923	50.5335	209.143	SW	0.00023895	0.000298688	0.000358425
1414	Intact	T	10	92.575	29.4622	44083.4	1125.74	110.232	496.808	Lobate-shaped	5106	5191	85	5160.43	7.12387	42.4677	35.3439	20.0007	0	358.877	358.877	70.75	E	0.000425014	0.000531267	0.000637521
1415	Intact	D	11	92.5752	29.3913	225024	2513.71	1045.29	308.899	Tongue-shaped	4935	5369	434	5148.05	0.983516	53.4694	52.4858	25.8284	0	356.143	356.143	289.634	W	0.0030057	0.00375713	0.00450856
1416	Relict	T	9	92.5759	29.8375	47223.4	1056.25	434.788	112.707	Tongue-shaped	5013	5186	173	5097.28	12.6168	34.5541	21.9374	22.8567	1.1233	358.603	357.48	242.374	SW
1417	Intact	D	10	92.576	29.8148	81779.5	1332.88	522.383	156.701	Tongue-shaped	5100	5281	181	5165.42	0.695485	47.2153	46.5199	23.0176	0	358.152	358.152	64.9319	NE	0.000892167	0.00111521	0.00133825
1418	Intact	T	11	92.5765	29.4673	11348.5	455.615	167.526	51.4507	Tongue-shaped	5233	5276	43	5256.58	11.3616	31.318	19.9564	20.8406	40.9958	111.541	70.5452	70.4456	E	8.34067e-05	0.000104258	0.00012511
1419	Intact	D	11	92.5775	29.8268	138480	2016.74	888.543	142.981	Tongue-shaped	5072	5318	246	5229.25	0.695485	38.0005	37.305	16.4588	0	348.69	348.69	112.386	E	0.00167856	0.0020982	0.00251784
1420	Intact	D	14	92.5779	29.4409	333555	3172.43	1401.81	226.957	Tongue-shaped	4921	5269	348	5157.39	1.73826	45.7904	44.0521	17.6985	0	359.474	359.474	210.488	SW	0.0048203	0.00602537	0.00723045
1421	Intact	D	10	92.5779	29.8167	12589.1	476.446	136.202	93.4482	Tongue-shaped	5081	5103	22	5092.6	2.19835	14.6312	12.4328	10.3943	12.1715	110.376	98.205	61.0044	NE	9.44644e-05	0.00011808	0.000141697
1422	Intact	T	10	92.5787	29.4915	34919.9	758.636	180.902	230.662	Lobate-shaped	5369	5445	76	5404.18	7.67527	40.5749	32.8996	18.6081	208.142	264.341	56.1989	233.649	SW	0.000321336	0.000401671	0.000482005
1423	Intact	D	11	92.579	29.577	152093	1999.22	844.7	227.715	Tongue-shaped	5325	5486	161	5374.71	2.11438	60.2929	58.1785	22.3918	79.992	346.799	266.807	260.837	W	0.00187847	0.00234809	0.00281771
1424	Intact	D	12	92.5792	29.5201	109038	1660.7	547.791	437.137	Tongue-shaped	5185	5357	172	5229.77	2.08564	41.073	38.9873	14.4384	0	352.875	352.875	261.925	W	0.00125999	0.00157499	0.00188999
1425	Intact	D	11	92.5793	29.5805	220742	2686.96	1161.05	212.745	Tongue-shaped	5254	5596	342	5393.94	1.39077	51.5448	50.1541	22.1638	0	358.946	358.946	208.429	SW	0.0029372	0.0036715	0.0044058
1426	Intact	T	11	92.5794	29.8227	35186.4	803.492	322.271	116.757	Tongue-shaped	5154	5325	171	5244.22	16.5727	43.5468	26.9742	28.6792	37.321	106.06	68.739	70.469	E	0.000324282	0.000405353	0.000486423
1427	Intact	T	10	92.5796	29.3798	101512	1369.56	391.045	237.179	Tongue-shaped	5255	5450	195	5336.99	1.55485	49.9335	48.3787	24.8124	203.199	323.13	119.932	260.753	W	0.00115636	0.00144545	0.00173454
1428	Intact	T	10	92.5796	29.2896	32483.6	691.018	144.615	229.744	Lobate-shaped	5238	5344	106	5305.03	11.9552	49.2747	37.3195	33.0406	213.69	324.181	110.49	271.54	W	0.000294625	0.000368282	0.000441938
1429	Intact	T	13	92.5797	29.5333	21556.4	664.196	107.113	233.89	Lobate-shaped	5377	5437	60	5408.5	9.31305	42.1891	32.876	25.0051	2.44241	87.3575	84.915	30.183	NE	0.000180121	0.000225151	0.000270181
1430	Intact	T	10	92.58	29.4897	54759.3	1008.4	161.642	314.166	Lobate-shaped	5353	5418	65	5388.14	5.24783	30.5709	25.3231	18.407	193.109	261.87	68.7607	232.82	SW	0.000551343	0.000689179	0.000827015
1431	Intact	D	10	92.5801	29.8169	39997.7	1265.28	449.314	141.034	Tongue-shaped	5032	5119	87	5076.8	4.71934	21.0004	16.2811	13.5016	7.59464	351.384	343.79	62.9186	NE	0.000378194	0.000472743	0.000567292
1432	Intact	T	10	92.5808	29.5214	42547.1	919.344	188.321	198.617	Lobate-shaped	5211	5333	122	5262.15	11.1834	33.5587	22.3754	22.5118	243.246	334.213	90.9668	280.65	W	0.000407302	0.000509128	0.000610954
1433	Intact	D	10	92.5808	29.5177	7774.74	349.287	131.664	67.9568	Tongue-shaped	5313	5359	46	5338	21.351	28.919	7.56802	25.0691	275.371	287.784	12.4129	280.664	W	5.2978e-05	6.62225e-05	7.9467e-05
1434	Intact	T	11	92.5809	29.325	91671.9	1437.08	635.638	165.175	Tongue-shaped	4986	5277	291	5117.45	3.42096	44.7333	41.3123	28.0861	3.12213	356.82	353.698	300.766	NW	0.00102319	0.00127899	0.00153478
1435	Intact	T	11	92.581	29.7562	139445	2487.26	1056.67	114.86	Tongue-shaped	4593	5042	449	4827.24	8.35153	45.7619	37.4104	25.9167	201.801	318.633	116.832	248.916	W	0.0016926	0.00211575	0.0025389
1436	Intact	T	10	92.5813	29.3992	38354.1	747.248	212.551	224.538	Lobate-shaped	4878	4946	68	4909.86	2.33155	30.277	27.9454	15.2885	2.72631	354.428	351.701	276.249	W	0.000359622	0.000449528	0.000539434
1437	Intact	T	12	92.5816	29.4774	44026.5	854.742	299.878	196.223	Tongue-shaped	5224	5299	75	5268.69	1.09958	27.9919	26.8923	14.5121	0	358.264	358.264	76.5453	E	0.000424355	0.000530444	0.000636533
1438	Intact	T	11	92.5823	29.5326	10842	461.617	74.5004	191.197	Lobate-shaped	5368	5398	30	5383.08	13.8094	36.5865	22.777	27.9007	4.51399	359.226	354.712	40.9946	NE	7.89597e-05	9.86996e-05	0.00011844
1439	Intact	T	9	92.5826	29.4185	21679.1	658.724	105.877	255.767	Lobate-shaped	5186	5225	39	5209.54	3.49062	33.391	29.9004	16.1997	230.711	303.111	72.4007	268.892	W	0.000181352	0.00022669	0.000272028
1440	Intact	T	10	92.5836	29.3578	65759.9	1027.84	270.113	323.158	Lobate-shaped	5069	5177	108	5115.46	5.89107	48.2875	42.3964	22.1484	205.974	318.576	112.602	281.727	W	0.000686792	0.000858491	0.00103019
1441	Intact	T	10	92.5838	29.4207	66125.4	1527.75	597.384	186.959	Tongue-shaped	5211	5342	131	5261.27	6.24448	28.8794	22.635	13.9818	102.995	297.474	194.48	197.249	S	0.000691376	0.00086422	0.00103706
1442	Intact	D	13	92.5839	29.2979	129018	1339.35	414.583	321.814	Tongue-shaped	5103	5260	157	5168.67	0.695485	40.4894	39.7939	21.0237	0.360345	359.454	359.094	127.64	SE	0.00154188	0.00192735	0.00231282
1443	Intact	T	10	92.5846	29.5325	10180.9	438.17	68.9171	178.226	Lobate-shaped	5370	5403	33	5384.25	8.7964	39.3555	30.5591	23.8732	0.674036	358.452	357.778	207.331	SW	7.32178e-05	9.15222e-05	0.000109827
1444	Relict	D	12	92.5847	29.7602	71503.7	1312.62	489.949	104.18	Tongue-shaped	4722	4963	241	4859.07	8.72952	48.02	39.2904	28.9185	205.872	313.112	107.239	265.091	W
1445	Intact	T	11	92.5849	29.4233	42847.6	1124.37	477.795	82.2037	Tongue-shaped	5304	5385	81	5354.33	5.24783	29.9722	24.7243	13.955	107.85	262.569	154.718	183.205	S	0.000410757	0.000513446	0.000616135
1446	Intact	T	9	92.5857	29.4137	14598.9	553.954	221.331	75.1189	Tongue-shaped	5112	5184	72	5149.39	13.9102	28.6117	14.7015	22.1981	168.311	231.809	63.4984	200.672	S	0.000112838	0.000141048	0.000169258
1447	Intact	D	9	92.5858	29.6069	501053	4658.71	2127.63	241.253	Tongue-shaped	4804	5307	503	5110.63	1.09958	44.0677	42.9681	15.6848	0	359.384	359.384	235.76	SW	0.00785477	0.00981846	0.0117822
1448	Intact	T	10	92.5858	29.2784	262317	3314.28	175.416	1445	Lobate-shaped	4958	5283	325	5116.89	4.65541	39.2326	34.5772	21.2847	27.4744	155.726	128.251	82.1864	E	0.00361296	0.00451621	0.00541945
1449	Intact	D	11	92.5858	29.5945	120552	1681.24	240.373	689.185	Lobate-shaped	5275	5333	58	5300.17	0.347755	39.2907	38.9429	12.0918	0.90938	358.668	357.758	262.181	W	0.00142128	0.0017766	0.00213192
1450	Intact	D	11	92.5866	29.5109	32742.8	869.043	120.723	302.035	Lobate-shaped	5455	5536	81	5480.33	6.65914	39.0823	32.4231	21.6259	200.854	267.769	66.9144	240.9	SW	0.000297448	0.00037181	0.000446172
1451	Intact	T	10	92.5869	29.7554	74924.9	1303.84	543.877	181.329	Tongue-shaped	4778	5084	306	4920.74	15.1755	49.66	34.4845	30.3146	224.459	309.068	84.609	265.563	W	0.000803201	0.001004	0.0012048
1452	Intact	T	9	92.587	29.4123	126977	2121.05	198.68	911.499	Lobate-shaped	5028	5287	259	5167.65	4.96668	36.6057	31.639	18.4345	6.70984	358.831	352.121	294.463	NW	0.00151267	0.00189083	0.002269
1453	Intact	T	11	92.5871	29.3769	91077.8	1207.99	360.921	220.145	Tongue-shaped	5342	5493	151	5420.27	1.25366	50.5977	49.344	23.0409	148.671	348.69	200.019	239.088	SW	0.00101524	0.00126905	0.00152286
1454	Intact	T	11	92.5873	29.3339	148696	1458.76	441.448	354.19	Tongue-shaped	4948	5136	188	5010.98	2.33155	46.0652	43.7337	21.2266	0	356.269	356.269	264.905	W	0.00182823	0.00228528	0.00274234
1455	Intact	T	11	92.588	29.4774	166001	2187.49	297.542	791.177	Lobate-shaped	5087	5264	177	5166.6	2.86531	31.4202	28.5549	14.0722	18.4349	115.017	96.5819	58.4144	NE	0.00208643	0.00260804	0.00312965
1456	Intact	T	11	92.5881	29.5258	67121	1155.85	159.355	420.538	Lobate-shaped	5252	5350	98	5294.1	11.209	36.7279	25.5189	25.257	181.848	245.647	63.7994	213.942	SW	0.000703886	0.000879858	0.00105583
1457	Intact	T	11	92.5889	29.4471	122583	1646.76	210.315	650.073	Lobate-shaped	4872	4977	105	4927.34	3.47333	37.8615	34.3882	20.5313	5.71059	356.76	351.05	46.4632	NE	0.00145007	0.00181258	0.0021751
1458	Intact	T	12	92.5889	29.5472	88691.5	1801.98	707.807	160.667	Tongue-shaped	5311	5468	157	5379.44	3.42096	29.5902	26.1692	15.1361	21.0375	355.601	334.564	60.676	NE	0.000983402	0.00122925	0.0014751
1459	Intact	T	10	92.5896	29.2843	40905.7	870.415	349.58	151.382	Tongue-shaped	5022	5181	159	5093.57	11.7286	36.4058	24.6772	27.4586	20.6589	111.541	90.8821	55.7731	NE	0.000388519	0.000485649	0.000582779
1460	Intact	D	11	92.5896	29.4613	140894	2821.83	1227.21	211.191	Tongue-shaped	4857	5215	358	5018.1	2.02692	39.472	37.4451	20.5204	0	359.215	359.215	240.693	SW	0.00171374	0.00214217	0.0025706
1461	Intact	T	10	92.5901	29.31	55769.2	935.041	332.182	174.429	Tongue-shaped	5200	5316	116	5248.06	8.65532	43.9092	35.2539	20.4422	218.911	275.013	56.1017	250.761	W	0.000563568	0.00070446	0.000845352
1462	Intact	D	12	92.5902	29.4215	44568.1	912.016	340.024	95.8285	Tongue-shaped	5443	5587	144	5518.85	7.4804	42.2789	34.7985	26.5929	0.364936	358.946	358.581	199.769	S	0.000430627	0.000538284	0.000645941
1463	Intact	T	10	92.5902	29.3131	48907.1	929.981	168.049	339.288	Lobate-shaped	5236	5323	87	5268.68	4.86928	33.0197	28.1504	18.7409	199.799	310.914	111.115	242.379	SW	0.000481414	0.000601767	0.00072212
1464	Intact	T	11	92.5908	29.2026	54622.4	1192.28	110.074	512.586	Lobate-shaped	4503	4722	219	4613.34	9.5967	34.5853	24.9886	22.715	273.424	354.56	81.1358	322.515	NW	0.000549689	0.000687111	0.000824533
1465	Intact	T	11	92.5914	29.2997	94689.1	1203.13	264.759	450.223	Lobate-shaped	4946	5027	81	4988.63	2.02692	28.4318	26.4049	13.8419	0	358.958	358.958	100.732	E	0.00106373	0.00132967	0.0015956
1466	Intact	T	10	92.5918	29.4146	41746.7	976.495	157.699	402.542	Lobate-shaped	5264	5374	110	5322.62	7.12387	35.2171	28.0933	20.7839	154.747	234.819	80.0725	203.484	SW	0.000398124	0.000497656	0.000597187
1467	Intact	T	11	92.5924	29.5034	36483.1	790.131	221.597	156.931	Tongue-shaped	5361	5451	90	5407.3	15.1319	27.5589	12.427	21.0186	57.1715	104.826	47.655	78.6227	E	0.000338674	0.000423343	0.000508012
1468	Intact	T	9	92.5928	29.4115	129210	1357.81	457.551	402.412	Tongue-shaped	5263	5434	171	5329.18	2.22563	49.3826	47.1569	22.3565	1.16914	359.69	358.521	232.05	SW	0.00154464	0.0019308	0.00231696
1469	Intact	T	10	92.5932	29.2481	172717	2311.71	963.587	167.548	Tongue-shaped	4700	5023	323	4863.93	6.24448	33.3004	27.0559	17.2314	228.18	331.144	102.965	281.322	W	0.00218814	0.00273517	0.0032822
1470	Intact	T	11	92.5933	29.5024	32328.4	812.282	288.644	115.327	Tongue-shaped	5342	5472	130	5398.29	8.7964	34.2213	25.4249	24.9792	41.4237	106.232	64.8087	70.7017	E	0.000292936	0.000366171	0.000439405
1471	Intact	T	10	92.5935	29.5221	16575.8	560.313	165.413	122.875	Tongue-shaped	5317	5403	86	5355	9.91272	44.5607	34.648	24.473	218.66	258.69	40.0303	240.781	SW	0.000131414	0.000164268	0.000197121
1472	Intact	T	10	92.5937	29.3831	70829.9	1044.29	222.864	314.656	Lobate-shaped	5294	5391	97	5335.73	3.74016	38.3284	34.5882	22.132	25.7347	83.1572	57.4225	50.3456	NE	0.000750815	0.000938518	0.00112622
1473	Intact	D	10	92.5941	29.2261	189131	2090.18	891.822	239.118	Tongue-shaped	4755	5013	258	4893.95	5.2819	51.6626	46.3807	18.1226	0	358.152	358.152	252.484	W	0.00243998	0.00304998	0.00365997
1474	Intact	T	11	92.5947	29.5013	31214.7	829.026	150.936	165.557	Lobate-shaped	5326	5437	111	5367.53	10.2295	34.9404	24.7108	20.2464	50.7106	87.2737	36.5631	66.7094	NE	0.000280869	0.000351086	0.000421303
1475	Intact	T	10	92.5949	29.3001	57376.7	955.489	269.708	229.873	Tongue-shaped	4923	5005	82	4960.73	1.73826	38.2394	36.5012	18.1668	0	359.384	359.384	167.024	S	0.000583116	0.000728895	0.000874674
1476	Intact	D	13	92.5952	29.4395	862483	4751.08	1786.55	431.596	Tongue-shaped	5010	5267	257	5128.73	0.777566	44.5629	43.7853	16.7643	0	359.326	359.326	187.615	S	0.0150721	0.0188401	0.0226081
1477	Intact	T	11	92.5955	29.5706	105671	1429.05	205.953	605.659	Lobate-shaped	5222	5325	103	5259.52	1.39077	39.8708	38.48	20.1032	0	358.264	358.264	281.855	W	0.00121345	0.00151681	0.00182017
1478	Intact	T	9	92.5962	29.2364	64658.5	1882.02	86.6666	879.3	Lobate-shaped	4624	4821	197	4735.4	10.7369	30.3147	19.5778	19.3825	2.21965	358.182	355.962	257.404	W	0.000673012	0.000841265	0.00100952
1479	Intact	T	10	92.5965	29.2927	90837.7	1311.56	523.47	198.769	Tongue-shaped	4907	5159	252	5039.08	8.72952	42.4978	33.7683	26.0298	24.353	115.278	90.9247	62.3367	NE	0.00101203	0.00126503	0.00151804
1480	Intact	T	11	92.5967	29.1926	95427.3	1163.59	302.395	325.954	Lobate-shaped	4978	5037	59	5011.88	2.64657	24.8723	22.2257	11.7356	0	358.264	358.264	153.975	SE	0.00107369	0.00134211	0.00161054
1481	Intact	T	10	92.5971	29.3003	52567.6	899.46	258.128	209.478	Tongue-shaped	4914	5029	115	4954.31	1.73826	46.94	45.2017	19.7335	2.1211	358.831	356.71	252.67	W	0.00052497	0.000656213	0.000787455
1482	Intact	T	10	92.5973	29.4109	44892.6	874.958	326.998	161.383	Tongue-shaped	5333	5479	146	5395.98	1.47509	45.9468	44.4717	26.3617	249.775	352.03	102.255	306.798	NW	0.000434392	0.00054299	0.000651588
1483	Intact	T	10	92.5973	29.381	37946.3	782.94	202.664	151.009	Tongue-shaped	5273	5343	70	5313.22	9.3755	30.3603	20.9848	18.07	6.34019	82.2348	75.8946	43.6003	NE	0.000355039	0.000443799	0.000532559
1484	Intact	D	10	92.5973	29.3159	46149.9	858.988	263.911	178.116	Tongue-shaped	5092	5202	110	5138.6	4.85697	38.8225	33.9655	23.5331	0.763898	359.594	358.83	145.666	SE	0.000449032	0.00056129	0.000673547
1485	Intact	T	10	92.5978	29.3101	48336.9	934.394	331.198	131.526	Tongue-shaped	5196	5301	105	5245.26	6.36714	40.2762	33.9091	20.7438	116.565	258.378	141.813	185.644	S	0.000474687	0.000593358	0.00071203
1486	Intact	T	11	92.5978	29.5411	60430.2	1060.68	250.005	405.93	Lobate-shaped	5155	5237	82	5193.42	3.49062	32.5741	29.0835	16.025	0	358.603	358.603	127.358	SE	0.000620551	0.000775688	0.000930826
1487	Intact	T	12	92.5979	29.4892	149551	1750.26	377.593	326.026	Tongue-shaped	5254	5373	119	5322.09	1.25366	40.4722	39.2185	16.5419	0	357.797	357.797	63.0088	NE	0.00184086	0.00230107	0.00276128
1488	Intact	T	11	92.5981	29.5768	89636.1	1299.92	184.788	462.723	Lobate-shaped	5216	5320	104	5254.6	2.08564	39.7924	37.7068	22.3586	13.6713	354.806	341.134	270.984	W	0.000995983	0.00124498	0.00149398
1489	Intact	T	10	92.5981	29.506	88432	1629.3	139.85	695.784	Lobate-shaped	5370	5516	146	5427.73	7.767	31.8768	24.1098	18.5159	167.276	284.47	117.195	235.914	SW	0.000979949	0.00122494	0.00146992
1490	Intact	D	12	92.5982	29.6015	242770	2230.31	891.214	382.941	Tongue-shaped	5261	5417	156	5325.01	0.777566	51.4987	50.7212	15.5797	1.36393	359.384	358.02	153.546	SE	0.00329235	0.00411544	0.00493853
1491	Intact	T	11	92.5986	29.196	92497.7	1306.05	207.612	500.631	Lobate-shaped	4923	5033	110	4974.28	0.695485	45.2018	44.5063	22.1679	0	337.218	337.218	270.818	W	0.00103426	0.00129282	0.00155139
1492	Intact	T	11	92.5986	29.7373	118231	1974.47	184.452	896.535	Lobate-shaped	4961	5099	138	5022.61	4.39024	37.1874	32.7971	19.6025	0	359.256	359.256	123.5	SE	0.00138851	0.00173564	0.00208277
1493	Intact	T	10	92.5987	29.3265	60099.5	898.895	283.892	229.6	Tongue-shaped	5147	5264	117	5218.2	3.57575	34.4823	30.9065	22.6608	9.68879	85.9144	76.2256	44.8616	NE	0.000616478	0.000770598	0.000924718
1494	Intact	T	10	92.5993	29.421	69402.3	1536.64	185.853	592.618	Lobate-shaped	5461	5572	111	5512.46	11.8063	37.3909	25.5846	26.2814	100.349	227.862	127.514	186.861	S	0.000732692	0.000915865	0.00109904
1495	Intact	T	11	92.5994	29.5812	83771.1	1425.76	235.331	541.491	Lobate-shaped	5203	5259	56	5227.43	5.2819	22.2538	16.9719	13.865	5.90614	338.199	332.292	273.497	W	0.000918302	0.00114788	0.00137745
1496	Intact	T	10	92.5995	29.2915	52518.5	986.212	225.498	312.624	Lobate-shaped	4866	4996	130	4915.32	4.56438	43.8728	39.3084	25.6996	19.9574	85.3645	65.4071	47.2689	NE	0.000524381	0.000655476	0.000786572
1497	Intact	T	10	92.5997	29.2553	54625.3	966.116	372.317	134.458	Tongue-shaped	4911	5042	131	4971.84	10.5907	40.6374	30.0466	21.8342	2.16108	351.951	349.79	290.398	W	0.000549724	0.000687155	0.000824586
1498	Intact	T	13	92.6001	29.6814	168332	2487.99	1013.84	193.744	Tongue-shaped	4641	5214	573	4920.2	5.58965	51.3794	45.7898	32.203	0.306391	359.526	359.22	276.434	W	0.00212165	0.00265206	0.00318247
1499	Intact	T	11	92.6006	29.5865	218054	2174.85	489.444	326.143	Tongue-shaped	5174	5261	87	5210.75	1.09958	29.1919	28.0923	9.83585	0	358.152	358.152	157.429	SE	0.00289434	0.00361792	0.0043415
1500	Intact	T	10	92.6009	29.4149	11084.2	441.905	169.477	86.5777	Tongue-shaped	5420	5512	92	5462.21	17.8442	39.3208	21.4767	29.5182	249.386	281.43	32.0439	266.86	W	8.10807e-05	0.000101351	0.000121621
1501	Intact	T	10	92.601	29.4204	67057.9	1028.3	354.02	216.848	Tongue-shaped	5446	5559	113	5504.25	13.0051	45.1283	32.1232	24.0782	154.747	322.815	168.068	231.655	SW	0.000703092	0.000878865	0.00105464
1502	Intact	T	10	92.6011	29.4182	49330.2	1139.91	184.747	368.158	Lobate-shaped	5411	5522	111	5454.33	6.65914	36.5203	29.8612	19.2995	213.69	291.915	78.2248	253.988	W	0.000486416	0.00060802	0.000729624
1503	Intact	T	12	92.6012	29.3011	94883.7	1384.57	244.395	559.099	Lobate-shaped	4881	4973	92	4918.55	4.04879	39.2536	35.2048	16.7676	0	358.807	358.807	150.962	SE	0.00106636	0.00133295	0.00159953
1504	Intact	T	9	92.6022	29.2242	25577.4	639.567	248.406	125.877	Tongue-shaped	5143	5208	65	5175.97	13.6464	29.684	16.0377	20.3682	227.49	331.699	104.21	273.097	W	0.000221156	0.000276445	0.000331734
1505	Intact	T	10	92.603	29.2486	109246	1512.45	603.133	218.792	Tongue-shaped	5011	5245	234	5135.01	8.28794	44.8174	36.5295	21.5579	200.376	353.79	153.414	276.59	W	0.00126287	0.00157859	0.0018943
1506	Intact	D	11	92.6034	29.7499	65961.7	985.324	343.199	216.509	Tongue-shaped	5267	5405	138	5327.36	2.77989	45.9374	43.1575	22.377	2.1211	350.838	348.717	270.511	W	0.000689323	0.000861654	0.00103398
1507	Intact	D	11	92.6034	29.5624	31369.8	1198.63	537.668	122.127	Tongue-shaped	5285	5337	52	5306.86	1.25366	38.8034	37.5497	12.889	0	358.264	358.264	193.237	S	0.000282545	0.000353181	0.000423817
1508	Intact	D	11	92.6039	29.729	132339	1819.28	240.78	742.201	Lobate-shaped	5160	5524	364	5284.4	1.73826	51.7713	50.033	19.443	0	358.668	358.668	126.907	SE	0.00158964	0.00198705	0.00238446
1509	Intact	T	10	92.6042	29.2352	59042.6	1053.91	189.94	440.587	Lobate-shaped	4835	4887	52	4862.67	3.83539	28.5265	24.6911	18.144	0	359.444	359.444	208.694	SW	0.000603492	0.000754364	0.000905237
1510	Intact	T	10	92.6044	29.7153	294540	4349.44	681.949	1107.35	Lobate-shaped	4791	5256	465	4952.8	1.39077	56.2029	54.8122	24.2285	0	359.673	359.673	273.089	W	0.0041519	0.00518987	0.00622784
1511	Intact	D	13	92.6051	29.464	343560	3083.79	1325.59	310.831	Tongue-shaped	5035	5414	379	5239.85	1.09958	53.2527	52.1532	21.0225	0	359.105	359.105	169.235	S	0.00499431	0.00624288	0.00749146
1512	Intact	T	11	92.6052	29.4873	218376	2030.49	394.066	648.191	Lobate-shaped	5064	5270	206	5144.9	4.19449	47.9855	43.791	22.5699	36.8699	113.552	76.6824	65.9606	NE	0.00289946	0.00362433	0.0043492
1513	Intact	T	11	92.6056	29.5937	314369	3115.65	295.103	1310.52	Lobate-shaped	5041	5196	155	5139.22	0	35.9774	35.9774	13.6061	-1	359.454	360.454	246.184	SW	0.00448952	0.0056119	0.00673429
1514	Intact	T	11	92.606	29.4985	82723.7	1469.89	521.568	221.886	Tongue-shaped	5183	5330	147	5248.35	4.96668	36.1177	31.151	14.9714	148.325	315	166.675	254.708	W	0.000904541	0.00113068	0.00135681
1515	Intact	D	12	92.6062	29.3682	368136	2302.42	736.114	513.661	Tongue-shaped	4998	5222	224	5112.18	2.33155	58.4201	56.0885	21.777	0	359.275	359.275	124.552	SE	0.00542602	0.00678253	0.00813904
1516	Intact	T	11	92.6064	29.6945	111557	1470.29	258.27	529.806	Lobate-shaped	4887	5071	184	4964.68	1.04316	41.3836	40.3404	22.7512	45	356.186	311.186	288.28	W	0.00129499	0.00161874	0.00194249
1517	Intact	T	10	92.6066	29.3816	106984	1423.42	244.107	537.169	Lobate-shaped	4841	5018	177	4914.77	6.36714	43.4109	37.0437	28.0217	20.4099	90	69.5901	59.6596	NE	0.00123155	0.00153944	0.00184733
1518	Intact	D	11	92.6067	29.5632	14150	727.149	316.205	48.9277	Tongue-shaped	5240	5294	54	5264.41	6.35779	38.4463	32.0885	18.7917	0	358.727	358.727	134.216	SE	0.000108688	0.00013586	0.000163032
1519	Intact	T	11	92.6071	29.7329	54879.1	980.074	273.154	289.371	Lobate-shaped	5121	5216	95	5162.57	1.09958	40.909	39.8094	18.1789	0	358.531	358.531	217.623	SW	0.000552791	0.000690989	0.000829186
1520	Intact	D	11	92.6072	29.2271	132533	1355.24	371.805	387.262	Lobate-shaped	5074	5159	85	5117.92	2.53008	35.8867	33.3566	14.9129	2.23117	358.831	356.6	227.124	SW	0.00159243	0.00199054	0.00238865
1521	Intact	T	10	92.6074	29.5716	20853	745.542	294.57	110.05	Tongue-shaped	5361	5483	122	5410.15	7.42487	38.3571	30.9322	27.5624	48.8141	107.241	58.4274	74.1029	E	0.000173091	0.000216364	0.000259637
1522	Intact	T	10	92.6074	29.5726	57658.3	1017.73	390.377	112.471	Tongue-shaped	5366	5466	100	5403.35	3.62587	42.9644	39.3385	19.2278	45	165.256	120.256	92.9272	E	0.000586552	0.00073319	0.000879828
1523	Intact	T	10	92.6074	29.6619	51458.4	938.105	277.165	176.338	Tongue-shaped	5133	5196	63	5164	0.347755	31.2889	30.9411	14.7993	0	326.31	326.31	222.642	SW	0.000511706	0.000639632	0.000767559
1524	Intact	D	10	92.6075	29.2543	40700.1	775.021	236.903	165.446	Tongue-shaped	5015	5084	69	5052.02	7.09888	42.2935	35.1947	20.1461	0	359.018	359.018	146.884	SE	0.000386178	0.000482722	0.000579267
1525	Intact	D	14	92.6079	29.2557	215249	2257.85	969.106	250.277	Tongue-shaped	4908	5148	240	5028.42	1.77267	34.7935	33.0209	16.1692	0	358.452	358.452	224.611	SW	0.00284971	0.00356214	0.00427457
1526	Intact	T	11	92.6083	29.5003	57993.1	1028.21	334.076	212.007	Tongue-shaped	5254	5329	75	5290.26	4.66827	38.9154	34.2471	14.1955	248.199	344.291	96.0928	296.517	NW	0.000590642	0.000738302	0.000885963
1527	Intact	D	11	92.6088	29.7611	580748	4678.28	2005.56	281.087	Tongue-shaped	5059	5377	318	5213.67	0.983516	44.7596	43.7761	16.7889	0	358.76	358.76	160.719	S	0.00937687	0.0117211	0.0140653
1528	Intact	T	10	92.6091	29.5101	69887.2	1506.78	240.005	546.891	Lobate-shaped	5310	5490	180	5397.53	6.95551	34.6846	27.7291	24.7135	184.399	264.193	79.7946	226.843	SW	0.000738839	0.000923549	0.00110826
1529	Intact	T	11	92.6093	29.401	207231	2288.65	338.956	949.236	Lobate-shaped	5077	5271	194	5187.84	1.43355	47.5281	46.0946	19.4044	192.031	334.026	141.995	276.908	W	0.00272282	0.00340352	0.00408423
1530	Intact	T	10	92.6095	29.3968	99424.3	1432.56	271.213	588.533	Lobate-shaped	5226	5366	140	5299.47	5.89107	53.199	47.308	25.4489	193.496	343.811	150.315	289.034	W	0.00112788	0.00140985	0.00169182
1531	Intact	T	11	92.6097	29.2409	68978.2	1491.7	128.198	637.878	Lobate-shaped	5006	5154	148	5092.18	3.20284	38.5891	35.3863	20.0598	210.784	337.249	126.465	253.382	W	0.000727322	0.000909152	0.00109098
1532	Intact	T	13	92.6097	29.5057	235221	2751.6	1032.75	422.433	Tongue-shaped	5274	5548	274	5377.73	1.55485	52.0546	50.4997	20.3321	135	324.462	189.462	243.219	SW	0.00316988	0.00396235	0.00475483
1533	Intact	T	12	92.61	29.7324	68547.1	1174.71	228.609	285.802	Lobate-shaped	5140	5221	81	5176.3	1.09958	34.6949	33.5953	14.1321	0	359.356	359.356	160.298	S	0.00072187	0.000902338	0.00108281
1534	Intact	D	11	92.6102	29.7132	229603	2820.39	1143.29	212.113	Tongue-shaped	4963	5389	426	5181.65	1.47509	46.6895	45.2144	24.8177	0	359.246	359.246	210.314	SW	0.00307925	0.00384906	0.00461887
1535	Intact	T	12	92.6108	29.5363	65845.2	1071.47	309.599	319.499	Lobate-shaped	5012	5172	160	5080.85	10.6776	41.9312	31.2536	27.1539	32.6375	123.024	90.3864	79.7708	E	0.000687862	0.000859827	0.00103179
1536	Intact	T	10	92.6114	29.2442	25403.4	729.334	112.032	308.381	Lobate-shaped	5134	5185	51	5163.26	6.56933	27.4633	20.894	17.0308	205.463	305.049	99.586	261.234	W	0.000219352	0.00027419	0.000329028
1537	Intact	T	11	92.6117	29.2001	110674	1694.17	743.027	144.643	Tongue-shaped	4906	5127	221	5030.83	2.53008	45.7329	43.2028	17.4825	1.93059	357.955	356.024	70.9058	E	0.0012827	0.00160338	0.00192405
1538	Intact	T	11	92.6121	29.7295	109261	1877.39	825.57	180.599	Tongue-shaped	5188	5359	171	5280.02	2.45752	36.8149	34.3574	16.167	0	358.831	358.831	221.868	SW	0.00126308	0.00157885	0.00189462
1539	Intact	T	13	92.6121	29.5027	136945	2000.47	155.178	802.227	Lobate-shaped	5267	5455	188	5371.82	3.47333	36.9095	33.4362	16.1072	144.462	307.786	163.323	261.111	W	0.00165626	0.00207033	0.00248439
1540	Intact	D	12	92.6123	29.669	129834	1643.7	588.032	268.947	Tongue-shaped	5198	5310	112	5267.64	1.25366	34.4143	33.1606	14.5343	1.21887	359.454	358.235	177.133	S	0.0015536	0.00194201	0.00233041
1541	Intact	T	11	92.6123	29.232	80024	1199.38	400.342	155.409	Tongue-shaped	4940	5148	208	5027.89	1.04316	41.6237	40.5806	24.632	0.430786	359.484	359.053	251.424	W	0.000869234	0.00108654	0.00130385
1542	Intact	T	10	92.6129	29.189	20848.3	566.333	205.784	133.933	Tongue-shaped	5109	5179	70	5132.35	3.95876	35.0607	31.102	19.5641	260.538	340.201	79.6634	299.33	NW	0.000173045	0.000216306	0.000259567
1543	Intact	T	10	92.613	29.3918	123998	1484.01	312.399	584.885	Lobate-shaped	5184	5338	154	5260.93	3.92828	54.3508	50.4225	22.396	180	333.116	153.116	282.943	W	0.00147018	0.00183773	0.00220528
1544	Intact	T	11	92.6133	29.5536	72229	1032.35	366.08	232.513	Tongue-shaped	4954	5100	146	5005.87	3.88212	49.9937	46.1116	22.2406	232.595	330.124	97.5293	299.972	NW	0.000768646	0.000960807	0.00115297
1545	Intact	T	11	92.6133	29.2486	34962.5	731.52	252.709	131.006	Tongue-shaped	5184	5352	168	5272.52	24.1106	41.6814	17.5707	34.5442	203.199	266.955	63.7566	241.795	SW	0.000321807	0.000402258	0.00048271
1546	Intact	T	9	92.6135	29.4099	49473.2	903.67	187.554	329.8	Lobate-shaped	5303	5416	113	5362.51	7.42487	42.2019	34.777	26.2489	213.69	276.71	63.0198	249.97	W	0.000488108	0.000610135	0.000732163
1547	Intact	T	11	92.6138	29.465	68414.2	1006.59	242.237	330.668	Lobate-shaped	5000	5096	96	5048.22	5.29321	31.7885	26.4953	20.7461	30.9638	346.608	315.644	65.4939	NE	0.000720192	0.00090024	0.00108029
1548	Intact	T	11	92.6138	29.2071	31119.6	735.958	118.164	259.02	Lobate-shaped	4772	4811	39	4793.36	4.96668	26.7978	21.8311	12.5511	223.409	340.942	117.533	300.738	NW	0.000279842	0.000349803	0.000419763
1549	Intact	T	11	92.6139	29.233	129541	1652.5	664.021	199.187	Tongue-shaped	4943	5129	186	5018.54	3.10741	47.4698	44.3624	16.694	0	355.764	355.764	297.405	NW	0.00154939	0.00193674	0.00232409
1550	Intact	T	12	92.614	29.2173	191441	2266.16	252.807	973.196	Lobate-shaped	4905	5093	188	5001.5	0.491794	33.391	32.8992	13.027	0	358.531	358.531	259.966	W	0.00247579	0.00309474	0.00371369
1551	Intact	T	10	92.6142	29.4626	33884.6	714.53	205.743	201.132	Tongue-shaped	5031	5101	70	5061.52	4.04879	35.5383	31.4895	21.8161	46.5074	104.036	57.5288	71.8966	E	0.000309938	0.000387422	0.000464907
1552	Intact	T	10	92.6142	29.5556	68551.4	1124.29	446.3	186.468	Tongue-shaped	4968	5158	190	5034.76	4.65541	40.696	36.0406	24.4304	258.996	341.565	82.5686	294.185	NW	0.000721925	0.000902406	0.00108289
1553	Intact	D	14	92.6143	29.5908	349710	3860.95	1677.48	219.73	Tongue-shaped	5109	5346	237	5258.8	0.777566	32.799	32.0214	11.6157	2.1211	358.958	356.837	134.835	SE	0.00510179	0.00637723	0.00765268
1554	Intact	T	10	92.6145	29.3297	21551.8	608.157	163.35	110.388	Tongue-shaped	4771	4842	71	4806	13.5846	34.4268	20.8422	23.0745	241.771	266.285	24.5135	251.479	W	0.000180075	0.000225094	0.000270112
1555	Intact	T	10	92.6145	29.1981	52951	1207.07	98.8497	525.169	Lobate-shaped	4966	5119	153	5045.38	9.5052	36.1817	26.6765	23.0364	0.60309	359.215	358.612	130.503	SE	0.000529568	0.00066196	0.000794352
1556	Intact	T	12	92.6146	29.7337	144505	1772.76	693.474	263.272	Tongue-shaped	5140	5351	211	5242.2	1.77267	37.6468	35.8741	18.6676	1.606	358.977	357.371	280.925	W	0.00176657	0.00220821	0.00264985
1557	Intact	D	14	92.6148	29.5796	124142	1942.18	791.303	228.485	Tongue-shaped	5271	5453	182	5344.92	5.38279	42.9905	37.6077	15.7416	1.54816	147.407	145.859	74.3689	E	0.00147222	0.00184028	0.00220834
1558	Intact	D	11	92.615	29.7143	445194	3714.98	1554.71	332.717	Tongue-shaped	4999	5351	352	5176.06	1.73826	44.8899	43.1516	16.4109	0	359.256	359.256	214.326	SW	0.00681603	0.00852004	0.010224
1559	Intact	D	10	92.615	29.4183	13756.9	481.5	120.426	133.262	Lobate-shaped	5447	5490	43	5471.36	10.4424	32.023	21.5807	23.5384	214.992	246.949	31.9567	233.605	SW	0.000105075	0.000131344	0.000157612
1560	Intact	T	10	92.6155	29.3506	10100	496.113	216.662	64.9476	Tongue-shaped	5104	5209	105	5146.64	22.0582	35.0365	12.9783	28.2006	241.535	309.144	67.6091	279.869	W	7.25201e-05	9.06501e-05	0.00010878
1561	Intact	D	11	92.6157	29.4037	200842	1945.32	577.596	383.644	Tongue-shaped	5274	5497	223	5371.87	1.25366	53.0224	51.7687	22.4118	0	355.764	355.764	286.203	W	0.00262239	0.00327799	0.00393359
1562	Intact	T	10	92.6157	29.5328	25175.3	723.558	276.111	114.005	Tongue-shaped	5114	5208	94	5147.07	14.2272	36.5525	22.3253	24.0647	252.512	280.67	28.1578	269.021	W	0.000216991	0.000271239	0.000325486
1563	Intact	T	10	92.6158	29.5316	12945.4	516.698	207.421	56.3186	Tongue-shaped	5105	5184	79	5152.81	16.7796	33.812	17.0324	24.9265	249.341	268.877	19.5356	262.489	W	9.76816e-05	0.000122102	0.000146522
1564	Intact	T	11	92.6159	29.243	53135.2	1366.82	109.713	623.778	Lobate-shaped	5192	5264	72	5221.56	6.12901	34.2858	28.1568	18.0432	106.314	272.291	165.977	170.399	S	0.000531779	0.000664724	0.000797668
1565	Intact	T	11	92.6159	29.6985	189135	1816.82	338.579	604.869	Lobate-shaped	5055	5177	122	5124.3	0.695485	39.8663	39.1708	11.6306	0	357.236	357.236	257.384	W	0.00244005	0.00305006	0.00366007
1566	Intact	T	11	92.616	29.5597	134714	1653.24	543.829	357.332	Tongue-shaped	4942	5187	245	5015.22	1.73826	53.1074	51.3692	23.1196	0	358.264	358.264	282.114	W	0.00162393	0.00202991	0.00243589
1567	Intact	T	10	92.6164	29.5905	68194.7	1410.43	136.802	640.107	Lobate-shaped	5239	5294	55	5272.41	0.695485	26.9436	26.2481	11.0307	0	358.854	358.854	197.585	S	0.000717419	0.000896774	0.00107613
1568	Intact	T	10	92.6165	29.2076	25642.3	673.742	131.359	257.631	Lobate-shaped	4805	4822	17	4816.21	0.777566	15.359	14.5815	6.8612	0	355.601	355.601	164.161	S	0.00022183	0.000277287	0.000332745
1569	Intact	T	10	92.6165	29.316	53065.2	979.942	359.168	148.487	Tongue-shaped	4709	4925	216	4812.79	17.4831	45.0759	27.5928	30.0228	232.214	291.656	59.4417	264.517	W	0.000530939	0.000663673	0.000796408
1570	Intact	T	10	92.6166	29.4944	27621.8	745.293	290.479	150.154	Tongue-shaped	5294	5400	106	5350.74	12.344	41.926	29.5819	28.3528	223.698	273.576	49.8783	246.05	SW	0.000242535	0.000303169	0.000363802
1571	Intact	T	12	92.6167	29.4629	31759	700.887	233.302	148.213	Tongue-shaped	5028	5141	113	5082.62	11.7286	49.8146	38.086	28.3585	228.9	280.784	51.8838	257.059	W	0.000286756	0.000358446	0.000430135
1572	Intact	D	11	92.6169	29.7151	66888.4	1016.53	337.2	256.637	Tongue-shaped	5076	5147	71	5120.68	2.33155	26.9387	24.6071	14.1025	1.1233	356.186	355.063	247.852	W	0.000700961	0.000876201	0.00105144
1573	Intact	D	12	92.6169	29.6651	30558.8	756.701	145.872	309.225	Lobate-shaped	5308	5366	58	5343.3	1.77267	28.9774	27.2048	14.267	9.8193	358.668	348.848	311.353	NW	0.000273801	0.000342251	0.000410702
1574	Intact	T	10	92.6169	29.4973	40728.8	775.928	224.076	216.761	Tongue-shaped	5352	5417	65	5395.36	1.73826	33.4978	31.7596	16.7248	188.13	327.095	138.965	255.238	W	0.000386504	0.00048313	0.000579757
1575	Intact	D	12	92.6172	29.4566	185210	1917.39	558.777	383.938	Tongue-shaped	5047	5220	173	5130.55	1.77267	30.5391	28.7665	13.9181	0	358.831	358.831	167.974	S	0.00237941	0.00297426	0.00356912
1576	Intact	D	10	92.6175	29.3951	67242.5	1036.42	395.456	177.49	Tongue-shaped	5322	5467	145	5382.84	4.04879	55.0086	50.9598	22.041	188.13	304.611	116.481	274.896	W	0.000705415	0.000881769	0.00105812
1577	Intact	T	10	92.6176	29.4992	17121.9	498.194	130.017	171.061	Lobate-shaped	5414	5496	82	5442.94	20.3342	47.945	27.6107	37.0696	243.785	279.134	35.3491	262.612	W	0.000136627	0.000170783	0.00020494
1578	Intact	T	11	92.6177	29.5608	54511.8	971.181	387.955	177.541	Tongue-shaped	4955	5100	145	4999.92	2.80149	39.6088	36.8073	19.9464	25.56	348.69	323.13	296.197	NW	0.000548354	0.000685442	0.000822531
1579	Intact	T	10	92.6178	29.18	86220.4	1535.38	157.348	682.844	Lobate-shaped	4880	5037	157	4964.14	2.50613	46.9013	44.3952	18.4455	138.366	320.631	182.264	247.025	SW	0.000950615	0.00118827	0.00142592
1580	Intact	T	9	92.6181	29.3525	33816.2	755.938	225.488	140.709	Tongue-shaped	5161	5270	109	5207.29	9.98858	45.5106	35.522	26.3464	191.31	293.488	102.178	264.89	W	0.000309188	0.000386485	0.000463782
1581	Intact	T	11	92.6187	29.243	26867.2	765.022	317.49	84.136	Tongue-shaped	5179	5341	162	5258.03	17.5166	35.9698	18.4532	29.9838	189.917	286.645	96.7285	244.486	SW	0.000234607	0.000293258	0.00035191
1582	Intact	D	10	92.6189	29.4068	76495.4	1023.13	329.891	266.795	Tongue-shaped	5380	5540	160	5459	6.81771	42.214	35.3963	29.5332	206.274	357.274	150.999	279.422	W	0.000823446	0.00102931	0.00123517
1583	Intact	D	11	92.6193	29.2513	56277.9	921.304	320.825	212.597	Tongue-shaped	5134	5277	143	5198.25	11.8834	41.1224	29.239	23.593	49.7636	116.565	66.8014	74.4072	E	0.000569741	0.000712177	0.000854612
1584	Intact	T	11	92.6193	29.5649	199324	1931.55	328.126	777.741	Lobate-shaped	4927	5064	137	4978.89	1.09958	47.7262	46.6266	18.1775	0	358.363	358.363	240.094	SW	0.00259863	0.00324829	0.00389794
1585	Intact	T	11	92.6194	29.5037	27674	712.679	148.922	278.421	Lobate-shaped	5379	5452	73	5418.16	14.3981	35.7704	21.3723	28.0176	49.2364	96.3402	47.1038	75.781	E	0.000243085	0.000303857	0.000364628
1586	Intact	D	9	92.6196	29.2531	152635	1810.35	530.516	189.766	Tongue-shaped	5126	5340	214	5228.6	6.92133	45.6338	38.7125	22.2464	51.941	352.875	300.934	85.7797	E	0.0018865	0.00235812	0.00282975
1587	Intact	D	10	92.6198	29.2801	25090.2	699.771	279.947	104.929	Tongue-shaped	5162	5245	83	5205.1	12.2748	36.4058	24.131	20.5124	0.430786	358.506	358.075	85.1946	E	0.000216112	0.00027014	0.000324168
1588	Intact	T	12	92.6198	29.2064	59334.2	1092.21	158.672	420.407	Lobate-shaped	4804	4868	64	4833.61	1.09958	29.9722	28.8726	13.4386	1.16914	358.603	357.434	177.714	S	0.00060707	0.000758838	0.000910605
1589	Intact	D	10	92.62	29.2496	39097.6	882.786	330.891	124.562	Tongue-shaped	5133	5300	167	5207.88	10.5907	41.2556	30.6649	26.5543	38.8534	83.5302	44.6768	66.2636	NE	0.000368004	0.000460005	0.000552006
1590	Intact	T	11	92.6203	29.3544	60990.3	1100.26	409.165	158.511	Tongue-shaped	5205	5388	183	5282.77	6.95551	49.9941	43.0386	22.0559	230.711	342.309	111.599	291.74	W	0.00062746	0.000784324	0.000941189
1591	Intact	T	11	92.6206	29.5018	38366.9	882.306	134.94	336.917	Lobate-shaped	5355	5417	62	5387.88	8.05754	33.9646	25.9071	16.8686	38.6598	116.565	77.9052	81.2432	E	0.000359767	0.000449708	0.00053965
1592	Intact	T	11	92.6206	29.6969	72855.9	1182.82	204.825	322.903	Lobate-shaped	5149	5318	169	5207.87	3.20284	48.5906	45.3877	24.6332	0.707319	359.519	358.811	153.592	SE	0.000776659	0.000970824	0.00116499
1593	Intact	D	9	92.6208	29.2486	40381	818.944	314.025	137.769	Tongue-shaped	5137	5273	136	5192.15	12.344	38.4397	26.0957	24.5257	40.6013	78.6901	38.0888	62.4993	NE	0.000382548	0.000478185	0.000573822
1594	Intact	T	13	92.6212	29.2591	28287.4	649.258	234.17	162.655	Tongue-shaped	5328	5403	75	5374.86	8.06484	38.8305	30.7656	22.5515	153.166	233.746	80.5802	183.674	S	0.000249565	0.000311956	0.000374347
1595	Intact	D	10	92.6212	29.7462	31243.1	762.947	132.621	321.567	Lobate-shaped	5377	5438	61	5402.86	2.86531	40.3825	37.5171	17.4173	5.90614	180	174.094	47.0812	NE	0.000281176	0.00035147	0.000421764
1596	Intact	T	11	92.6213	29.2334	68928.7	1158.62	170.339	495.325	Lobate-shaped	5098	5165	67	5132.77	2.19835	23.899	21.7007	13.182	242.526	346.218	103.693	308.046	NW	0.000726696	0.000908369	0.00109004
1597	Intact	T	11	92.6219	29.6903	70433.5	1267.71	262.69	455.862	Lobate-shaped	5329	5472	143	5374.17	8.29503	41.1649	32.8699	21.6624	5.30093	149.744	144.443	67.6364	E	0.000745775	0.000932219	0.00111866
1598	Intact	T	11	92.622	29.3796	61306.1	992.571	178.514	365.442	Lobate-shaped	5198	5253	55	5223.28	3.95876	29.2952	25.3365	12.2843	239.036	335.556	96.5198	306.532	NW	0.00063136	0.0007892	0.00094704
1599	Intact	T	10	92.622	29.4541	11242.4	400.086	105.806	126.326	Lobate-shaped	5217	5276	59	5237.93	11.1834	41.8947	30.7114	26.1191	242.879	270.822	27.9437	255.867	W	8.2471e-05	0.000103089	0.000123707
1600	Intact	T	11	92.6225	29.4992	55105.1	1072.46	272.553	249.795	Tongue-shaped	5310	5406	96	5352.17	6.80028	42.8468	36.0466	18.5866	40.7108	151.557	110.846	86.687	E	0.000555524	0.000694405	0.000833287
1601	Intact	T	10	92.6228	29.4979	18129.6	616.668	236.331	62.8994	Tongue-shaped	5307	5402	95	5354.23	19.4524	36.4363	16.984	26.5793	38.7581	98.9017	60.1436	78.0851	E	0.000146332	0.000182915	0.000219498
1602	Intact	D	10	92.6231	29.2803	54615.8	997.892	392.51	142.777	Tongue-shaped	5067	5250	183	5151.03	10.459	45.9675	35.5085	25.5569	8.25253	79.439	71.1865	40.6029	NE	0.00054961	0.000687012	0.000824414
1603	Intact	T	10	92.6232	29.4969	13915.8	489.694	193.434	91.3628	Tongue-shaped	5294	5397	103	5337.56	20.439	37.1449	16.7059	29.8428	66.2092	89.4645	23.2553	79.2609	E	0.000106533	0.000133166	0.000159799
1604	Intact	T	10	92.6232	29.4555	24625.5	659.386	262.202	106.72	Tongue-shaped	5263	5323	60	5285.92	7.88007	46.0892	38.2091	28.6926	0	359.136	359.136	214.682	SW	0.000211317	0.000264147	0.000316976
1605	Intact	D	10	92.6234	29.7463	15716.1	497.08	178.51	106.63	Tongue-shaped	5351	5399	48	5372.89	7.05703	29.5226	22.4655	16.1319	17.3279	66.5014	49.1735	46.3255	NE	0.000123278	0.000154098	0.000184918
1606	Intact	D	9	92.6239	29.2481	62095.3	944.752	257.82	280.935	Lobate-shaped	5128	5176	48	5153.73	2.80149	22.6551	19.8536	12.1494	0	355.872	355.872	133.431	SE	0.000641125	0.000801406	0.000961687
1607	Intact	T	10	92.624	29.5683	28610.8	723.138	287.257	117.017	Tongue-shaped	4906	5007	101	4959.87	14.2585	36.7588	22.5003	21.6152	0	358.472	358.472	275.477	W	0.000252994	0.000316242	0.00037949
1608	Intact	T	11	92.6245	29.6969	193814	2770.6	1222.65	187.694	Tongue-shaped	5136	5336	200	5253.21	0.347755	40.6536	40.3059	12.7335	0.629598	359.293	358.663	280.325	W	0.00251267	0.00314084	0.00376901
1609	Intact	T	13	92.6246	29.6997	96548.1	1967.61	142.268	904.699	Lobate-shaped	5160	5318	158	5250.89	1.73826	35.2361	33.4978	17.3455	116.565	251.565	135	205.339	SW	0.00108884	0.00136105	0.00163326
1610	Intact	T	11	92.6248	29.3012	451036	3835.32	379.909	1488.85	Lobate-shaped	4655	5045	390	4861.79	2.86531	50.1989	47.3336	22.7228	0.556251	359.605	359.049	283.4	W	0.0069235	0.00865438	0.0103853
1611	Intact	T	11	92.6251	29.3349	223732	2150.07	624.741	369.191	Tongue-shaped	5016	5165	149	5084.76	2.02692	33.088	31.0611	15.7078	0	359.091	359.091	206.467	SW	0.00298502	0.00373127	0.00447752
1612	Intact	T	10	92.6251	29.2375	15225.7	495.452	192.799	103.559	Tongue-shaped	5182	5277	95	5218.11	9.3755	47.1806	37.8051	29.3666	226.317	282.381	56.0639	261.291	W	0.000118677	0.000148346	0.000178015
1613	Intact	T	13	92.6253	29.5731	43277.5	880.991	320.206	138.591	Tongue-shaped	4871	4967	96	4908.7	3.20284	33.9549	30.7521	17.4883	212.471	324.462	111.991	272.001	W	0.000415707	0.000519633	0.00062356
1614	Intact	T	11	92.6256	29.3809	57633.6	956.665	327.683	273.651	Tongue-shaped	5235	5343	108	5289.93	1.09958	46.2558	45.1563	23.0002	0	333.435	333.435	277.11	W	0.000586251	0.000732814	0.000879377
1615	Intact	D	11	92.6259	29.7469	166000	2622.4	1124.41	219.902	Tongue-shaped	5222	5411	189	5294.11	1.09958	43.0316	41.932	14.6388	0	353.234	353.234	62.8045	NE	0.00208642	0.00260802	0.00312963
1616	Relict	T	11	92.6259	29.614	140819	1707.21	726.857	255.833	Tongue-shaped	4748	5166	418	4905.65	4.34904	48.2186	43.8695	29.5003	177.274	292.38	115.106	237.681	SW
1617	Intact	T	12	92.626	29.6915	99098.9	1271.3	295.143	472.414	Lobate-shaped	5304	5376	72	5350.38	1.39077	34.3901	32.9994	16.4321	0	358.531	358.531	202.486	S	0.00112345	0.00140432	0.00168518
1618	Intact	T	10	92.6265	29.182	82653.6	1339.38	517.13	135.436	Tongue-shaped	4919	5089	170	5003.2	4.18015	47.4862	43.3061	23.0247	7.85331	356.634	348.78	97.5988	E	0.000903622	0.00112953	0.00135543
1619	Intact	T	11	92.6266	29.564	49593.5	926.213	209.663	251.016	Lobate-shaped	5008	5107	99	5056.27	8.31626	32.8302	24.5139	23.2889	35.5377	100.437	64.8998	69.723	E	0.000489534	0.000611917	0.000734301
1620	Intact	T	11	92.6267	29.5615	75978.5	1098.94	280.404	281.219	Lobate-shaped	5019	5132	113	5077.35	10.9179	38.403	27.4851	22.5626	35.7539	106.587	70.8335	76.5598	E	0.000816772	0.00102097	0.00122516
1621	Intact	T	11	92.6269	29.2818	167485	2185.89	767.211	389.551	Tongue-shaped	4868	5104	236	5029.63	3.57575	38.1466	34.5709	16.8512	0	358.531	358.531	117.472	SE	0.00210885	0.00263606	0.00316327
1622	Intact	T	12	92.627	29.6114	84659.1	1439.82	604.575	191.166	Tongue-shaped	4786	5132	346	4911.43	9.3755	52.1685	42.793	29.6559	217.185	291.251	74.0658	254.443	W	0.000929995	0.00116249	0.00139499
1623	Intact	T	11	92.6271	29.5598	17293.8	599.219	238.994	138.587	Tongue-shaped	5041	5085	44	5066.62	12.8347	21.351	8.51633	16.6977	54.6599	96.5463	41.8864	74.4354	E	0.000138275	0.000172843	0.000207412
1624	Intact	T	11	92.6271	29.5578	62294.5	1204.42	207.73	472.161	Lobate-shaped	5063	5162	99	5108.67	4.71934	35.4549	30.7356	18.477	15.7512	160.201	144.45	66.6582	NE	0.000643594	0.000804493	0.000965392
1625	Intact	T	13	92.6273	29.5787	100778	1834.55	802.829	213.957	Tongue-shaped	4859	5246	387	4977.38	1.25366	44.8302	43.5766	24.6318	78.6901	347.735	269.045	289.651	W	0.00114633	0.00143291	0.0017195
1626	Intact	T	13	92.6273	29.5745	222658	1965.98	738.126	421.138	Tongue-shaped	4869	5170	301	4963.73	2.22563	40.6536	38.428	22.4702	0	356.906	356.906	273.968	W	0.00296782	0.00370977	0.00445173
1627	Intact	T	10	92.6273	29.5544	31688.8	729.858	282.321	147.65	Tongue-shaped	5135	5259	124	5180.03	10.865	50.748	39.8831	24.1636	14.8265	83.991	69.1645	52.0463	NE	0.000285995	0.000357494	0.000428993
1628	Intact	D	13	92.6277	29.4739	187425	2385.5	1046.8	263.101	Tongue-shaped	5114	5373	259	5247.45	2.45752	34.7361	32.2785	17.1024	1.4688	356.987	355.518	84.1107	E	0.00241361	0.00301701	0.00362041
1629	Intact	T	10	92.6278	29.5533	16089.2	595.823	248.943	93.3084	Tongue-shaped	5134	5244	110	5183.71	22.085	30.4286	8.34362	26.8121	47.6026	72.5252	24.9227	60.8026	NE	0.000126799	0.000158498	0.000190198
1630	Intact	T	12	92.6279	29.4996	72780.2	1090.38	303.352	268.525	Tongue-shaped	5191	5347	156	5272.73	11.0593	39.9243	28.865	26.4401	227.045	286.821	59.776	254.602	W	0.000775691	0.000969613	0.00116354
1631	Intact	T	12	92.6281	29.4979	24387.7	623.89	199.158	114.007	Tongue-shaped	5189	5292	103	5242.44	17.4097	34.8997	17.49	26.8419	226.762	274.497	47.7348	256.928	W	0.00020887	0.000261088	0.000313306
1632	Intact	T	10	92.6281	29.552	31892.8	813.457	327.747	111.306	Tongue-shaped	5171	5369	198	5245.38	18.7838	43.9382	25.1545	29.4513	42.1729	76.2005	34.0276	61.6503	NE	0.000288206	0.000360258	0.000432309
1633	Intact	T	11	92.6282	29.2279	42181.4	770.85	223.066	206.565	Tongue-shaped	5108	5215	107	5149.38	8.65532	54.7967	46.1414	24.5016	222.879	327.68	104.801	283.998	W	0.000403105	0.000503881	0.000604658
1634	Intact	T	10	92.6285	29.2008	28055.4	675.05	262.017	133.633	Tongue-shaped	5066	5203	137	5129.79	18.0564	38.8734	20.8169	28.9768	277.237	314.045	36.8083	294.647	NW	0.000247111	0.000308889	0.000370667
1635	Intact	T	12	92.6286	29.4956	37893.1	776.041	305.534	142.9	Tongue-shaped	5181	5309	128	5242.52	9.25015	48.5661	39.316	25.229	214.846	279.072	64.2258	249.5	W	0.000354441	0.000443051	0.000531662
1636	Intact	T	10	92.629	29.5515	19563	753.179	321.564	68.9486	Tongue-shaped	5132	5270	138	5203.14	17.6678	36.8167	19.1489	24.6652	39.3693	86.9872	47.6179	63.0307	NE	0.000160323	0.000200404	0.000240485
1637	Intact	T	12	92.6292	29.5834	92540.8	1560.88	203.417	673.354	Lobate-shaped	4836	4886	50	4859.87	1.96645	32.5858	30.6194	12.8943	8.42697	357.138	348.711	247.729	W	0.00103484	0.00129355	0.00155226
1638	Intact	T	10	92.6292	29.2228	50807.4	893.354	347.973	157.92	Tongue-shaped	5149	5312	163	5220.75	14.2311	44.9996	30.7684	27.8552	176.532	264.068	87.5367	226.429	SW	0.000503947	0.000629933	0.00075592
1639	Intact	T	11	92.6294	29.5512	27159.3	910.861	401.589	98.0134	Tongue-shaped	5134	5341	207	5211.06	16.6894	45.2013	28.5119	25.6962	51.2635	78.9436	27.6801	65.9166	NE	0.00023767	0.000297088	0.000356505
1640	Intact	T	9	92.6295	29.3323	42908.5	837.322	189.884	202.509	Lobate-shaped	5114	5182	68	5149.1	5.55752	26.1509	20.5933	15.4316	3.17983	358.409	355.229	131.712	SE	0.000411457	0.000514321	0.000617185
1641	Intact	D	13	92.6303	29.4845	331577	2726.67	970.637	632.494	Tongue-shaped	5067	5358	291	5155.23	2.02692	50.9708	48.9439	19.5281	0	359.029	359.029	282.442	W	0.00478601	0.00598251	0.00717901
1642	Intact	T	11	92.6303	29.2997	101918	1316.2	310.957	321.462	Lobate-shaped	5005	5063	58	5039.68	1.87208	24.4969	22.6248	10.4208	0	359.356	359.356	203.076	SW	0.00116192	0.0014524	0.00174288
1643	Intact	T	13	92.631	29.7017	137965	1738.27	264.436	639.385	Lobate-shaped	5308	5441	133	5370.19	1.77267	30.2945	28.5218	15.9664	94.3987	279.728	185.329	188.218	S	0.00167107	0.00208883	0.0025066
1644	Intact	T	11	92.6313	29.7408	88025.5	1752.42	149.772	755.121	Lobate-shaped	5265	5415	150	5327.29	2.64657	32.0024	29.3558	14.1108	20.1196	157.62	137.5	84.1745	E	0.000974546	0.00121818	0.00146182
1645	Intact	D	11	92.6313	29.3252	103587	1496.17	593.992	161.426	Tongue-shaped	5174	5393	219	5268.3	1.87208	47.5281	45.656	21.9087	14.2645	355.426	341.162	267.592	W	0.00118479	0.00148098	0.00177718
1646	Intact	T	11	92.6314	29.5478	43828.3	1119.87	470.819	107.429	Tongue-shaped	5146	5284	138	5211.42	10.8491	25.8149	14.9658	19.1498	19.9325	79.1597	59.2272	48.121	NE	0.000422063	0.000527579	0.000633095
1647	Intact	T	11	92.632	29.5053	97030.5	1467.08	250.707	592.953	Lobate-shaped	5368	5463	95	5420.57	2.02692	43.8442	41.8173	17.3672	4.18492	359.029	354.844	278.75	W	0.00109537	0.00136922	0.00164306
1648	Intact	T	12	92.6323	29.6962	133923	1945.03	223.323	811.787	Lobate-shaped	5328	5386	58	5357.74	1.04316	42.0394	40.9962	15.1895	1.16914	353.66	352.491	247.033	SW	0.0016125	0.00201562	0.00241875
1649	Intact	D	13	92.6323	29.404	459240	3393.02	1309.7	550.724	Tongue-shaped	5146	5431	285	5254.98	0.695485	49.373	48.6775	15.7335	0	359.215	359.215	114.867	SE	0.00707489	0.00884362	0.0106123
1650	Intact	T	11	92.6323	29.5472	26548.2	765.466	286.969	135.188	Tongue-shaped	5144	5236	92	5184.06	1.25366	37.6948	36.4411	17.8607	11.3099	79.439	68.1291	51.7966	NE	0.000231267	0.000289084	0.000346901
1651	Intact	T	9	92.6341	29.2418	116835	1364.05	350.134	376.853	Lobate-shaped	4958	5109	151	5037.2	9.74117	44.8899	35.1487	21.5142	23.8387	124.695	100.856	61.5694	NE	0.00136886	0.00171107	0.00205329
1652	Intact	T	11	92.6346	29.7773	63029.5	1524.5	686.2	106.524	Tongue-shaped	5041	5335	294	5166.75	9.57239	46.6012	37.0288	26.8271	27.5408	82.9333	55.3925	55.0031	NE	0.000652717	0.000815897	0.000979076
1653	Intact	D	10	92.6347	29.2696	74397.3	1222.79	534.651	188.924	Tongue-shaped	5064	5299	235	5166.42	11.7042	42.0787	30.3745	27.2539	1.7357	358.958	357.223	272.342	W	0.000796418	0.000995522	0.00119463
1654	Intact	T	10	92.6349	29.2591	29649.8	652.579	211.78	194.108	Tongue-shaped	5206	5327	121	5256.26	8.7964	49.7312	40.9348	30.3801	49.2054	109.44	60.2347	83.9507	E	0.000264058	0.000330072	0.000396087
1655	Intact	T	9	92.635	29.3409	37935.7	761.391	163.597	240.706	Lobate-shaped	5037	5100	63	5062.11	0.777566	43.4109	42.6333	20.1985	0	359.029	359.029	133.121	SE	0.000354919	0.000443649	0.000532379
1656	Intact	T	11	92.6355	29.5012	22822.4	662.737	96.0517	252.112	Lobate-shaped	5432	5497	65	5462.42	10.7369	43.0895	32.3526	25.3052	72.1497	146.976	74.8265	112.43	E	0.000192888	0.00024111	0.000289332
1657	Intact	T	11	92.6356	29.7005	18671.2	517.039	156.97	127.595	Tongue-shaped	5334	5407	73	5378.73	5.05034	36.0344	30.9841	23.2233	255.466	330.945	75.4799	284.828	W	0.000151593	0.000189492	0.00022739
1658	Intact	T	11	92.6357	29.2998	293176	2899.41	367.591	1184.42	Lobate-shaped	5002	5174	172	5088.02	1.87208	34.4958	32.6238	14.4856	0	359.356	359.356	279.127	W	0.00412883	0.00516103	0.00619324
1659	Intact	T	11	92.636	29.774	20655.6	617.936	128.157	181.463	Lobate-shaped	5117	5186	69	5152.96	19.4603	35.7153	16.255	27.8063	36.3268	67.7028	31.376	51.687	NE	0.000171126	0.000213908	0.00025669
1660	Intact	D	10	92.6363	29.332	182716	2022.34	490.692	409.129	Tongue-shaped	5169	5398	229	5277.81	1.25366	55.789	54.5354	26.1212	2.60256	358.831	356.228	295.708	NW	0.00234101	0.00292626	0.00351152
1661	Intact	T	9	92.6365	29.3665	37359.7	836.823	337.919	128.705	Tongue-shaped	5084	5218	134	5142.54	7.13218	35.2122	28.08	23.4569	228.945	273.715	44.7701	256.854	W	0.000348463	0.000435578	0.000522694
1662	Intact	T	11	92.6368	29.7719	33538.4	810.681	133.906	297.423	Lobate-shaped	5149	5233	84	5185.88	4.96668	30.5086	25.5419	22.7769	15.5928	77.9052	62.3124	50.0326	NE	0.000306142	0.000382678	0.000459213
1663	Intact	T	11	92.6369	29.3612	190339	2049.48	278.092	866.564	Lobate-shaped	5064	5171	107	5118.46	5.15586	28.5115	23.3557	16.8552	208.009	322.352	114.343	262.361	W	0.0024587	0.00307337	0.00368804
1664	Intact	D	13	92.6371	29.4875	145362	1669.08	504.03	369.214	Tongue-shaped	5145	5286	141	5199.68	2.22563	28.1214	25.8958	14.43	1.7357	354.806	353.07	278.067	W	0.00177916	0.00222395	0.00266874
1665	Intact	T	12	92.6372	29.2791	228725	1863.35	591.574	563.988	Tongue-shaped	4861	5056	195	4956.37	2.50613	40.9291	38.423	19.6314	3.36646	358.531	355.165	277.585	W	0.00306514	0.00383142	0.00459771
1666	Intact	T	9	92.6373	29.2168	15379.8	470.193	133.081	126.418	Tongue-shaped	5069	5146	77	5100.79	11.3464	39.5033	28.1568	25.9514	46.2454	118.61	72.3651	76.1306	E	0.000120119	0.000150149	0.000180179
1667	Intact	T	9	92.6381	29.2226	30735	702.925	273.126	132.053	Tongue-shaped	5087	5223	136	5144.11	12.3991	45.1267	32.7276	29.4946	37.875	130.601	92.7263	88.8008	E	0.000275698	0.000344622	0.000413547
1668	Intact	T	10	92.6384	29.349	125412	1539.94	525.842	277.575	Tongue-shaped	5081	5251	170	5153.56	5.15586	47.8059	42.65	19.8001	0.668791	356.634	355.965	312.41	NW	0.00149032	0.0018629	0.00223549
1669	Intact	T	10	92.6385	29.258	94139.7	1495.18	237.308	570.775	Lobate-shaped	5110	5207	97	5150.96	3.49062	34.2117	30.7211	17.3447	21.4253	136.102	114.676	65.6791	NE	0.00105633	0.00132041	0.0015845
1670	Intact	T	11	92.6389	29.4934	140458	2085.81	916.714	199.425	Tongue-shaped	5177	5422	245	5301.16	3.2955	45.5711	42.2756	19.1353	46.7899	217.875	171.085	149.738	SE	0.00170737	0.00213421	0.00256105
1671	Intact	T	11	92.639	29.2653	34486.1	697.508	188.201	220.474	Lobate-shaped	5141	5243	102	5170.15	12.3716	51.4371	39.0655	24.0535	26.5651	96.789	70.2239	58.925	NE	0.000316552	0.00039569	0.000474828
1672	Intact	T	11	92.6392	29.5595	11710.2	462.397	72.661	193.511	Lobate-shaped	5327	5368	41	5347.83	19.8378	37.0704	17.2326	28.6768	40.0608	91.9091	51.8484	65.7199	NE	8.6606e-05	0.000108257	0.000129909
1673	Intact	T	10	92.6396	29.4532	24894.2	679.99	247.575	139.032	Tongue-shaped	5329	5460	131	5368.34	9.69927	40.6473	30.948	24.7258	85.1792	130.684	45.5047	109.004	E	0.000214087	0.000267609	0.000321131
1674	Intact	T	9	92.6396	29.3995	23817	723.002	111.159	275.566	Lobate-shaped	5302	5343	41	5319.36	11.1782	37.3778	26.1996	24.8154	2.48955	357.184	354.695	98.8402	E	0.000203019	0.000253774	0.000304529
1675	Intact	T	9	92.6399	29.6338	60524.3	1159.6	185.996	503.043	Lobate-shaped	5005	5101	96	5052.6	9.31305	38.7938	29.4808	19.4978	237.804	322.472	84.6673	277.25	W	0.00062171	0.000777138	0.000932566
1676	Intact	D	11	92.64	29.7663	318032	2877.2	1137.29	312.099	Tongue-shaped	5200	5390	190	5282.65	0.491794	42.8817	42.3899	14.4736	0	359.091	359.091	170.511	S	0.00455238	0.00569047	0.00682856
1677	Intact	T	11	92.641	29.2791	62032.8	954.151	304.978	253.733	Tongue-shaped	5002	5155	153	5042.63	3.62587	54.3387	50.7128	21.324	0.567266	359.506	358.939	255.766	W	0.000640351	0.000800439	0.000960527
1678	Intact	T	11	92.641	29.7305	127163	1690.79	265.893	714.872	Lobate-shaped	5108	5284	176	5190.35	4.66827	49.5142	44.846	32.2411	28.6105	166.607	137.997	62.8341	NE	0.00151532	0.00189415	0.00227298
1679	Intact	T	10	92.6413	29.3083	7894.81	331.638	95.4533	105.552	Lobate-shaped	5187	5211	24	5196.5	6.19664	32.0315	25.8349	17.0395	288.435	329.036	40.6013	310.961	NW	5.39613e-05	6.74516e-05	8.09419e-05
1680	Intact	T	9	92.6414	29.6172	188974	1779.76	401.104	561.096	Lobate-shaped	5171	5295	124	5248.99	1.43355	44.1927	42.7591	15.5323	0	357.357	357.357	116.727	SE	0.00243756	0.00304696	0.00365635
1681	Intact	T	11	92.6416	29.6275	104102	1489.45	212.487	645.889	Lobate-shaped	5072	5173	101	5127.44	4.04879	34.6691	30.6203	19.1572	75.9638	323.366	247.402	274.25	W	0.00119185	0.00148981	0.00178778
1682	Intact	T	12	92.6416	29.4833	76340.1	1431.39	580.763	249.896	Tongue-shaped	5263	5343	80	5284.79	2.9686	35.7163	32.7477	12.0983	0	358.264	358.264	174.114	S	0.00082144	0.0010268	0.00123216
1683	Intact	D	12	92.6418	29.5639	220652	1942.58	600.695	349.706	Tongue-shaped	5266	5369	103	5312.18	1.04316	28.7646	27.7214	12.13	3.36646	358.452	355.085	136.963	SE	0.00293576	0.0036697	0.00440364
1684	Intact	T	11	92.642	29.5577	23168.8	747.641	94.7852	294.837	Lobate-shaped	5326	5395	69	5367.83	13.1431	28.8956	15.7525	21.8399	291.468	347.969	56.5017	312.116	NW	0.000196406	0.000245508	0.00029461
1685	Intact	T	9	92.6421	29.385	54130.1	916.636	323.083	176.732	Tongue-shaped	5044	5234	190	5107.79	4.39024	59.4396	55.0494	29.6718	11.8215	350.838	339.016	302.37	NW	0.00054375	0.000679687	0.000815625
1686	Intact	T	10	92.6426	29.7865	73968.4	1348.17	468.94	117.725	Tongue-shaped	5169	5442	273	5287.28	9.78882	49.2049	39.4161	28.6104	248.334	345.256	96.9224	312.092	NW	0.000790912	0.00098864	0.00118637
1687	Intact	D	13	92.6431	29.3906	316849	2772.84	1204.92	386.363	Tongue-shaped	4945	5359	414	5155.62	1.55485	49.0799	47.5251	23.1384	7.00127	352.349	345.348	106.216	E	0.00453205	0.00566506	0.00679807
1688	Intact	T	9	92.6431	29.3477	49922.1	861.226	195.342	294.143	Lobate-shaped	5222	5352	130	5298.67	9.5967	45.604	36.0073	30.0404	0.374476	358.958	358.584	303.493	NW	0.000493428	0.000616785	0.000740142
1689	Intact	T	12	92.6431	29.4447	126859	1607.71	337.054	473.693	Lobate-shaped	5279	5391	112	5335.16	1.73826	34.454	32.7158	16.1017	2.29061	174.806	172.515	60.7898	NE	0.00151097	0.00188872	0.00226646
1690	Intact	T	10	92.6431	29.245	78667	1067.88	368.082	245.154	Tongue-shaped	4876	4979	103	4926.2	6.65022	27.238	20.5877	17.1523	0	358.727	358.727	185.687	S	0.000851576	0.00106447	0.00127736
1691	Intact	T	10	92.6431	29.5601	30109.2	865.838	338.648	149.949	Tongue-shaped	5343	5482	139	5393	14.2935	36.9741	22.6805	25.2686	225	336.571	111.571	279.112	W	0.000268975	0.000336218	0.000403462
1692	Intact	T	10	92.6436	29.5674	44267.5	1077.24	139.149	336.875	Lobate-shaped	5211	5275	64	5250	2.22563	40.4342	38.2086	13.0362	2.48955	357.614	355.124	235.386	SW	0.000427145	0.000533931	0.000640717
1693	Intact	T	10	92.6438	29.3872	31777.3	751.563	240.978	148.586	Tongue-shaped	4991	5090	99	5030.95	3.57575	37.2754	33.6996	21.9657	14.7436	353.047	338.303	285.318	W	0.000286955	0.000358693	0.000430432
1694	Intact	D	12	92.6438	29.5768	117504	2068.39	935.693	159.254	Tongue-shaped	5056	5206	150	5138.34	1.43355	33.0151	31.5815	15.5905	2.23117	358.781	356.55	141.522	SE	0.00137827	0.00172284	0.00206741
1695	Intact	T	10	92.6439	29.436	13977.3	473.832	165.429	79.8738	Tongue-shaped	5145	5185	40	5166.67	9.72324	23.2281	13.5049	14.9399	7.76517	64.6538	56.8887	34.3652	NE	0.000107097	0.000133872	0.000160646
1696	Intact	T	10	92.6441	29.2699	41340.3	835.501	288.828	155.428	Tongue-shaped	5162	5313	151	5214.71	8.81635	49.4514	40.6351	24.7088	67.6199	101.129	33.5093	81.5236	E	0.000393478	0.000491848	0.000590217
1697	Intact	T	9	92.6442	29.2031	18642.2	563.396	211.159	131.402	Tongue-shaped	4990	5030	40	5011.87	2.45752	31.4026	28.9451	16.5219	2.24574	358.264	356.019	234.986	SW	0.000151311	0.000189139	0.000226966
1698	Intact	T	9	92.6444	29.2777	22607.7	632.327	231.112	149.765	Tongue-shaped	5073	5178	105	5103.78	6.72127	44.504	37.7828	24.1524	0	359.397	359.397	126.378	SE	0.000190713	0.000238392	0.00028607
1699	Intact	T	10	92.6448	29.4009	161300	1738	307.619	519.157	Lobate-shaped	5025	5216	191	5109.89	8.5393	49.3237	40.7844	24.5316	0.674036	359.145	358.471	56.4941	NE	0.00201574	0.00251967	0.00302361
1700	Intact	T	11	92.6451	29.2797	102019	1388.92	254.536	520.116	Lobate-shaped	5019	5093	74	5049.19	1.39077	22.1385	20.7477	11.4509	0	356.878	356.878	203.861	SW	0.0011633	0.00145412	0.00174495
1701	Intact	T	9	92.6458	29.2044	23098	670.383	131.297	220.722	Lobate-shaped	4944	4998	54	4972.14	7.13218	28.8074	21.6752	16.5026	1.00509	356.987	355.982	121.191	SE	0.000195687	0.000244609	0.00029353
1702	Intact	T	14	92.6459	29.598	148551	1754.68	723.959	215.666	Tongue-shaped	5136	5459	323	5296.54	7.2963	48.4119	41.1156	25.5562	150.255	267.166	116.911	217.599	SW	0.0018261	0.00228262	0.00273915
1703	Intact	T	10	92.646	29.453	22318.2	607.439	220.023	124.191	Tongue-shaped	5223	5315	92	5275.04	14.4788	36.1224	21.6436	23.7906	156.297	203.806	47.5086	186.409	S	0.000187786	0.000234733	0.000281679
1704	Intact	T	9	92.6461	29.356	25228.3	627.903	231.362	161.456	Tongue-shaped	5277	5374	97	5313.4	5.00271	43.879	38.8763	23.8357	209.055	316.762	107.708	275.601	W	0.000217539	0.000271924	0.000326309
1705	Intact	D	11	92.6463	29.4177	47345	866.825	276.5	208.208	Tongue-shaped	5291	5404	113	5335.14	7.2963	44.9557	37.6594	22.5383	3.52145	88.727	85.2055	41.6226	NE	0.000463022	0.000578778	0.000694534
1706	Intact	T	10	92.6464	29.2732	24555.2	653.022	115.029	271.961	Lobate-shaped	5186	5250	64	5209.3	7.83505	45.181	37.3459	26.7176	153.699	198.435	44.736	180.294	S	0.000210593	0.000263241	0.000315889
1707	Intact	T	10	92.6469	29.2673	87325.3	1787.26	114.472	761.839	Lobate-shaped	5076	5208	132	5146.81	2.80149	40.298	37.4965	17.3153	32.4712	142.125	109.654	76.6596	E	0.000965252	0.00120656	0.00144788
1708	Relict	T	11	92.6469	29.5145	59669.1	1066.44	427.359	148.61	Tongue-shaped	5128	5310	182	5221.3	11.502	35.9774	24.4754	23.1457	88.8309	178.847	90.0157	135.058	SE
1709	Intact	T	12	92.647	29.2615	134053	1989.58	299.794	839.619	Lobate-shaped	4983	5156	173	5045.24	0.695485	32.2148	31.5193	14.7327	17.7004	188.13	170.43	71.8104	E	0.00161437	0.00201797	0.00242156
1710	Intact	T	9	92.6473	29.2259	46568.2	987.288	198.329	380.55	Lobate-shaped	4915	5032	117	4966.81	6.72127	32.6444	25.9231	20.035	25.796	100.491	74.6955	50.7943	NE	0.000453921	0.000567401	0.000680881
1711	Intact	T	9	92.6475	29.2449	37868.8	864.144	351.709	120.11	Tongue-shaped	4913	5114	201	4973.48	7.83505	55.4049	47.5698	27.2193	2.93567	356.73	353.794	312.635	NW	0.000354169	0.000442712	0.000531254
1712	Intact	T	11	92.6481	29.4291	48363.6	945.655	316.23	206.927	Tongue-shaped	5128	5244	116	5170.51	3.69162	38.5016	34.81	21.7082	4.3987	357.274	352.875	312.818	NW	0.000475002	0.000593752	0.000712503
1713	Intact	T	12	92.6481	29.6714	139011	1907.21	331.012	792.127	Lobate-shaped	5106	5225	119	5165.51	0.695485	41.639	40.9435	21.0052	0	359.193	359.193	106.147	E	0.00168629	0.00210786	0.00252943
1714	Intact	T	10	92.649	29.4515	39606.2	850.475	175.01	322.143	Lobate-shaped	5177	5232	55	5206.07	8.7964	28.7646	19.9682	18.0647	157.166	237.339	80.1727	193.114	S	0.000373757	0.000467196	0.000560635
1715	Intact	D	14	92.6492	29.4169	72881.1	1105.4	376.363	202.727	Tongue-shaped	5216	5337	121	5274.62	5.48177	36.2951	30.8133	18.37	0.784824	353.991	353.206	45.7453	NE	0.000776981	0.000971226	0.00116547
1716	Intact	D	12	92.6498	29.5544	58176.4	1256.49	131.318	429.787	Lobate-shaped	5242	5340	98	5298.29	2.19835	35.2381	33.0397	15.0428	4.87927	358.025	353.146	71.0475	E	0.000592883	0.000741104	0.000889324
1717	Intact	T	9	92.6499	29.2457	37795.5	828.273	296.524	168.294	Tongue-shaped	4894	5070	176	4940.82	10.035	52.291	42.256	23.9431	0	355.972	355.972	299.639	NW	0.000353346	0.000441683	0.00053002
1718	Intact	T	12	92.65	29.6937	39980.6	759.09	224.536	197.819	Tongue-shaped	5293	5386	93	5330.09	4.44456	45.0317	40.5872	20.9385	2.1211	356.186	354.065	228.94	SW	0.000378	0.0004725	0.000567001
1719	Intact	D	11	92.65	29.7804	180579	2063.7	803.745	218.546	Tongue-shaped	5248	5420	172	5309.42	1.55485	46.0147	44.4599	15.7427	0.763898	359.061	358.297	122.397	SE	0.00230819	0.00288524	0.00346229
1720	Intact	T	11	92.6502	29.6976	43531.2	860.01	177.421	325.355	Lobate-shaped	5292	5380	88	5331.6	6.92133	43.3997	36.4784	22.548	227.862	333.435	105.573	268.097	W	0.000418632	0.00052329	0.000627948
1721	Intact	T	12	92.6515	29.6665	21283.4	569.281	124.211	199.698	Lobate-shaped	5221	5265	44	5240.2	7.88755	28.1214	20.2339	18.2592	10.4375	343.811	333.373	62.23	NE	0.000177387	0.000221734	0.000266081
1722	Intact	T	9	92.6516	29.2002	24328.5	672.731	269.697	102.419	Tongue-shaped	4926	5051	125	4978.8	16.2696	35.6115	19.3419	25.4561	26.5651	120.114	93.5487	82.9704	E	0.000208263	0.000260328	0.000312394
1723	Intact	T	11	92.6518	29.7004	46179.8	1174.07	111.73	516.691	Lobate-shaped	5332	5414	82	5378.62	5.54676	40.2588	34.7121	17.6989	254.526	344.578	90.0519	295.613	NW	0.000449382	0.000561727	0.000674073
1724	Intact	D	13	92.6527	29.7718	181849	2096.1	873.214	199.97	Tongue-shaped	5236	5542	306	5359.39	1.43355	51.7586	50.325	22.6491	0.545657	359.17	358.624	107.582	E	0.00232769	0.00290961	0.00349153
1725	Intact	T	12	92.6528	29.271	23046.1	764.2	99.6354	322.564	Lobate-shaped	5095	5169	74	5128.85	7.94711	20.4241	12.477	15.1287	12.7712	356.186	343.415	81.6027	E	0.000195159	0.000243949	0.000292739
1726	Intact	T	9	92.6529	29.2468	52278.2	1055.07	438.687	155.041	Tongue-shaped	4877	5083	206	4985.76	16.3625	50.3126	33.9501	31.8749	219.806	316.818	97.0127	280.218	W	0.000521503	0.000651879	0.000782255
1727	Intact	T	10	92.653	29.3973	130859	1790.55	184.419	775.518	Lobate-shaped	4886	4941	55	4914.6	2.45752	46.9423	44.4847	13.788	0	358.919	358.919	129.759	SE	0.00156832	0.0019604	0.00235248
1728	Intact	T	10	92.653	29.4577	134605	2399.2	288.566	886.94	Lobate-shaped	5237	5426	189	5319.25	2.80149	28.8662	26.0647	14.4473	108.034	252.759	144.724	173.507	S	0.00162236	0.00202795	0.00243354
1729	Intact	T	10	92.653	29.4649	44032.7	1010.49	392.314	115.37	Tongue-shaped	5401	5526	125	5450.04	5.38279	44.9769	39.5941	18.1325	105.701	227.726	122.025	147.311	SE	0.000424427	0.000530533	0.00063664
1730	Intact	T	12	92.6533	29.6653	9518.71	373.787	103.86	93.1198	Tongue-shaped	5249	5300	51	5274.5	5.15586	36.3314	31.1756	28.1973	0	353.884	353.884	71.6799	E	6.75408e-05	8.4426e-05	0.000101311
1731	Intact	D	12	92.6537	29.7543	547142	4415.27	1268.75	410.521	Tongue-shaped	5184	5382	198	5280.89	0.347755	44.7531	44.4054	14.7235	0	358.264	358.264	148.794	SE	0.00872956	0.010912	0.0130943
1732	Intact	T	9	92.6539	29.2014	22143.9	724.321	91.5196	308.805	Lobate-shaped	4828	4906	78	4866.16	15.0407	35.0607	20.02	24.0602	37.0107	82.2348	45.2242	61.6813	NE	0.000186028	0.000232535	0.000279041
1733	Intact	D	13	92.6544	29.4165	201582	1968.68	675.509	195.879	Tongue-shaped	5168	5357	189	5265.66	0.777566	51.8434	51.0658	17.5994	0	359.341	359.341	105.634	E	0.002634	0.00329249	0.00395099
1734	Intact	T	10	92.6547	29.4448	41525.6	826.32	296.798	195.851	Tongue-shaped	5048	5217	169	5107.1	10.035	44.2867	34.2517	27.6758	227.643	313.568	85.9254	267.054	W	0.000395596	0.000494495	0.000593394
1735	Intact	T	10	92.6551	29.28	169143	1739.59	367.187	487.343	Lobate-shaped	5051	5164	113	5090.06	0.695485	48.9295	48.234	16.5457	0	359.145	359.145	183.197	S	0.00213391	0.00266739	0.00320086
1736	Intact	T	11	92.6551	29.4491	52621.9	976.723	372.784	155.114	Tongue-shaped	5055	5200	145	5123.21	7.59017	34.8263	27.2361	21.8231	151.699	292.38	140.681	255.585	W	0.00052562	0.000657025	0.00078843
1737	Intact	T	10	92.6551	29.2539	15520.1	629.632	60.9143	252.757	Lobate-shaped	4790	4816	26	4802.94	8.40064	20.2941	11.8935	14.8665	233.915	352.999	119.084	300.718	NW	0.000121436	0.000151795	0.000182154
1738	Intact	T	9	92.6552	29.201	16465.5	556.253	209.403	99.1576	Tongue-shaped	4822	4922	100	4860.53	8.20951	42.1276	33.9181	25.7694	0	357.056	357.056	101.164	E	0.000130365	0.000162956	0.000195548
1739	Intact	T	10	92.6552	29.4469	50519	866.502	266.662	220.836	Tongue-shaped	5047	5187	140	5115.85	5.73719	37.6297	31.8925	29.1455	233.13	280.008	46.8779	263.969	W	0.000500516	0.000625646	0.000750775
1740	Intact	T	12	92.6556	29.7758	106667	1345.67	299.748	465.986	Lobate-shaped	5208	5328	120	5241.93	1.04316	46.5554	45.5122	19.7706	0.93919	358.452	357.513	261.132	W	0.00122718	0.00153398	0.00184078
1741	Intact	D	10	92.6557	29.3545	202373	2333.98	829.777	277.086	Tongue-shaped	5035	5245	210	5132.56	1.09958	47.8803	46.7807	16.3241	7.59464	358.025	350.43	97.0874	E	0.0026464	0.003308	0.0039696
1742	Intact	T	10	92.6562	29.2532	46553.3	806.645	220.398	240.866	Lobate-shaped	4805	4923	118	4843.21	6.32026	52.3388	46.0185	25.0706	255.411	352.185	96.7736	308.603	NW	0.000453746	0.000567183	0.000680619
1743	Intact	T	11	92.6564	29.4525	78556.2	1372.12	546.475	190.683	Tongue-shaped	5113	5308	195	5210.35	7.2963	51.0934	43.7971	20.3206	202.166	331.991	129.824	280.904	W	0.000850138	0.00106267	0.00127521
1744	Intact	T	12	92.6565	29.6308	112660	1279.75	452.544	363.741	Tongue-shaped	4994	5219	225	5063.31	5.96148	54.7593	48.7978	24.9319	202.834	312.274	109.44	250.173	W	0.00131037	0.00163797	0.00196556
1745	Relict	D	12	92.6567	29.494	119217	1886.5	802.766	196.843	Tongue-shaped	5062	5396	334	5204.21	9.40656	40.677	31.2704	23.3517	36.1932	143.427	107.234	70.4654	E
1746	Intact	T	10	92.6567	29.2549	21388.3	674.876	228.743	174.674	Tongue-shaped	4790	4848	58	4804.62	2.19835	35.1481	32.9498	13.9846	5.90614	353.66	347.754	239.704	SW	0.000178436	0.000223045	0.000267655
1747	Intact	T	14	92.6569	29.2706	187346	1993.39	819.779	291.87	Tongue-shaped	4939	5108	169	5033.95	2.71406	23.9447	21.2307	13.2883	14.0362	154.44	140.404	76.7091	E	0.00241238	0.00301548	0.00361857
1748	Intact	T	9	92.6573	29.2023	55519.3	1002.76	197.691	418.824	Lobate-shaped	4719	4836	117	4793.82	5.20205	36.6377	31.4357	18.8568	1.4688	353.29	351.821	50.1781	NE	0.000560538	0.000700673	0.000840808
1749	Intact	T	12	92.6574	29.4539	46095.1	946.676	351.576	185.342	Tongue-shaped	5138	5330	192	5196.83	4.39024	46.1331	41.7429	24.9882	14.3493	355.426	341.077	262.862	W	0.000448392	0.00056049	0.000672588
1750	Intact	T	10	92.6577	29.5931	28241.5	700.956	273.449	125.294	Tongue-shaped	5110	5165	55	5135.5	7.97672	25.6514	17.6747	15.1154	227.121	332.65	105.529	264.902	W	0.000249079	0.000311349	0.000373619
1751	Relict	D	11	92.6578	29.4927	114520	1818.76	729.166	198.876	Tongue-shaped	5058	5324	266	5184.58	10.035	35.5725	25.5375	19.8888	30.1414	106.976	76.8341	64.3443	NE
1752	Intact	T	10	92.658	29.2551	12083.3	411.699	142.965	96.8749	Tongue-shaped	4795	4837	42	4816.07	11.4521	29.7593	18.3073	20.0251	282.653	324.162	41.5098	304.871	NW	8.99284e-05	0.000112411	0.000134893
1753	Relict	T	10	92.658	29.7952	89046.9	1557.78	585.734	132.531	Tongue-shaped	4749	5020	271	4910.36	9.36304	39.4788	30.1158	25.5098	3.36646	358.409	355.042	259.908	W
1754	Intact	T	10	92.6581	29.5385	54272.4	998.916	377.576	175.065	Tongue-shaped	5063	5172	109	5106.16	8.62817	35.8483	27.2202	22.5147	10.6197	105.852	95.2323	60.6694	NE	0.000545465	0.000681831	0.000818198
1755	Intact	T	10	92.6582	29.5951	31524.2	773.25	324.455	118.43	Tongue-shaped	5132	5214	82	5177.81	8.35153	29.4448	21.0932	15.7225	171.87	263.418	91.5482	220.129	SW	0.000284214	0.000355268	0.000426321
1756	Intact	T	10	92.6585	29.282	34369.2	738.23	137.875	238.597	Lobate-shaped	5053	5117	64	5076.02	5.24783	42.6473	37.3995	19.2562	268.531	346.39	77.8591	311.566	NW	0.000315265	0.000394081	0.000472897
1757	Intact	T	10	92.6586	29.5353	50255	914.12	296.973	234.952	Tongue-shaped	5101	5292	191	5180.42	19.4497	51.9859	32.5362	31.4118	40.486	98.8959	58.4098	68.1314	E	0.00049738	0.000621725	0.00074607
1758	Intact	T	11	92.6593	29.4567	63638.3	1042.16	328.757	189.297	Tongue-shaped	5166	5310	144	5214.54	4.56438	47.3423	42.7779	21.1816	242.354	318.18	75.8258	292.694	NW	0.00066029	0.000825363	0.000990435
1759	Relict	D	10	92.66	29.4902	271384	2312.73	925.594	367.248	Tongue-shaped	4980	5291	311	5102.15	2.45752	51.3715	48.914	21.153	2.29061	175.601	173.311	53.717	NE
1760	Intact	T	10	92.66	29.2842	31038.2	772.161	132.759	251.389	Lobate-shaped	5063	5149	86	5096.13	11.6797	41.391	29.7113	25.8499	260.395	342.489	82.0943	292.723	NW	0.000278965	0.000348706	0.000418447
1761	Intact	T	10	92.6602	29.2569	43917.5	881.163	322.736	115.061	Tongue-shaped	4767	4875	108	4813.16	2.43285	33.6414	31.2085	19.4211	1.606	358.264	356.658	261.159	W	0.000423095	0.000528868	0.000634642
1762	Intact	D	12	92.6609	29.538	224096	2571.71	1089.64	265.755	Tongue-shaped	5055	5340	285	5171.58	6.65914	40.2726	33.6135	23.7834	1.97493	353.29	351.315	289.859	W	0.00299085	0.00373856	0.00448627
1763	Intact	T	12	92.6609	29.4586	105649	1635.31	626.925	279.516	Tongue-shaped	5190	5415	225	5256.13	1.73826	49.9457	48.2074	19.2031	0	359.523	359.523	264.605	W	0.00121314	0.00151643	0.00181971
1764	Relict	T	10	92.6609	29.5434	11309.7	402.16	110.493	103.562	Tongue-shaped	5072	5098	26	5085.46	16.2462	26.0988	9.85261	19.45	236.689	285.396	48.7062	265.673	W
1765	Relict	T	11	92.661	29.5419	33491.9	720.303	207.883	171.946	Tongue-shaped	5042	5129	87	5079.38	5.92135	38.2427	32.3214	21.0864	240.255	335.556	95.3009	264.859	W
1766	Intact	T	11	92.6612	29.5044	178808	2190.38	931.198	280.657	Tongue-shaped	4928	5325	397	5120.5	6.24448	50.7187	44.4742	25.6821	30.9638	156.571	125.608	67.0111	NE	0.00228106	0.00285132	0.00342159
1767	Intact	T	9	92.6614	29.2482	11833.9	440.86	153.567	95.8444	Tongue-shaped	5015	5097	82	5038.93	11.8978	46.7939	34.8961	28.0462	86.4965	113.587	27.0906	99.9135	E	8.77053e-05	0.000109632	0.000131558
1768	Intact	T	12	92.6615	29.6241	79358.3	1056.5	274.227	379.391	Lobate-shaped	5039	5130	91	5082.76	5.41599	37.1378	31.7219	19.0523	221.248	315	93.7517	253.114	W	0.000860564	0.00107571	0.00129085
1769	Intact	T	10	92.6616	29.3601	245692	2187.64	402.265	807.493	Lobate-shaped	5005	5219	214	5080.42	0.777566	55.935	55.1575	24.3222	0	358.303	358.303	250.862	W	0.00333997	0.00417496	0.00500995
1770	Relict	T	11	92.6619	29.5101	22310.5	901.432	394.29	78.5624	Tongue-shaped	5010	5177	167	5078.21	13.4476	34.8181	21.3705	25.7832	225	268.556	43.5559	243.542	SW
1771	Relict	T	10	92.6623	29.5559	44105.9	806.148	265.968	205.067	Tongue-shaped	4995	5094	99	5040.55	11.606	32.5389	20.9328	21.4765	245.556	287.319	41.7629	269.339	W
1772	Intact	T	12	92.6623	29.3096	86609	1180.25	318.915	264.179	Tongue-shaped	5085	5249	164	5152.03	3.20284	51.6591	48.4562	25.2427	0	359.465	359.465	124.083	SE	0.000955759	0.0011947	0.00143364
1773	Intact	T	10	92.6624	29.2782	57193.9	1131.73	472.469	159.971	Tongue-shaped	5109	5273	164	5180.69	10.167	32.9464	22.7794	21.3544	65.3764	138.731	73.355	95.8987	E	0.000580888	0.00072611	0.000871332
1774	Relict	T	9	92.6626	29.5096	20506.1	749.034	306.779	93.315	Tongue-shaped	5023	5170	147	5093.46	18.4632	32.6782	14.215	27.7846	223.62	254.055	30.435	233.648	SW
1775	Relict	T	10	92.6628	29.558	37832.7	763.205	283.927	183.513	Tongue-shaped	5000	5123	123	5062.91	9.0522	37.8242	28.772	24.5681	226.507	297.255	70.7479	268.885	W
1776	Relict	T	10	92.6628	29.5504	12570	436.81	158.013	102.147	Tongue-shaped	5079	5157	78	5113.6	22.1496	37.4353	15.2856	30.4676	282.068	296.147	14.0791	289.306	W
1777	Intact	T	13	92.6629	29.5968	120080	1934.86	214.054	716.21	Lobate-shaped	5195	5304	109	5249.42	0.777566	34.1234	33.3458	10.6151	0	357.879	357.879	274.721	W	0.00141462	0.00176827	0.00212192
1778	Relict	T	9	92.6629	29.5087	9712.93	402.367	150.405	68.8971	Tongue-shaped	5018	5089	71	5047.83	17.5287	36.7832	19.2545	28.7591	214.261	241.144	26.8832	228.603	SW
1779	Intact	D	11	92.6632	29.7851	289431	3303.83	1326.63	165.255	Tongue-shaped	4786	5193	407	5054.89	1.55485	47.153	45.5982	17.4628	0	359.17	359.17	106.917	E	0.00406561	0.00508201	0.00609842
1780	Intact	T	11	92.6634	29.4599	96971.3	1226.21	310.367	287.271	Tongue-shaped	5210	5343	133	5276.38	1.87208	46.0657	44.1937	20.8045	0.590656	357.709	357.119	291.141	W	0.00109457	0.00136821	0.00164186
1781	Intact	T	10	92.6636	29.2599	48348.9	900.4	337.875	193.08	Tongue-shaped	4730	4865	135	4782.47	8.15196	34.7925	26.6405	22.6767	4.18492	358.995	354.81	314.519	NW	0.000474829	0.000593536	0.000712243
1782	Intact	T	11	92.6646	29.4755	20859.1	773.809	108.425	340.085	Lobate-shaped	5442	5462	20	5451.48	8.23812	21.0959	12.8578	11.8625	221.82	307.875	86.0548	260.974	W	0.000173152	0.00021644	0.000259728
1783	Intact	T	11	92.6651	29.6811	83921.5	1310.91	196.993	527.982	Lobate-shaped	5199	5277	78	5234.41	0.983516	31.196	30.2125	15.6486	0	359.31	359.31	161.954	S	0.00092028	0.00115035	0.00138042
1784	Intact	T	12	92.6653	29.3118	238752	2543.59	438.81	680.83	Lobate-shaped	4980	5110	130	5044	0	41.6264	41.6264	12.3571	-1	358.831	359.831	110.304	E	0.00322708	0.00403385	0.00484062
1785	Intact	T	10	92.6654	29.6189	50089.8	861.718	312.96	184.78	Tongue-shaped	5073	5198	125	5134.52	1.55485	36.5341	34.9793	23.057	229.574	291.501	61.9275	248.494	W	0.000495418	0.000619273	0.000743127
1786	Intact	T	10	92.6655	29.2761	21938.2	758.287	280.478	75.2789	Tongue-shaped	5030	5112	82	5071.88	10.3253	42.8908	32.5655	24.5869	39.2894	133.091	93.8014	77.19	E	0.000183956	0.000229945	0.000275934
1787	Intact	T	11	92.6659	29.4508	57754.4	964.679	338.798	172.24	Tongue-shaped	5312	5505	193	5411.1	12.4083	46.9946	34.5863	29.2414	108.886	175.365	66.4784	151.231	SE	0.000587726	0.000734658	0.000881589
1788	Intact	T	10	92.666	29.2751	18216.1	529.472	183.96	120.856	Tongue-shaped	4998	5090	92	5031.36	9.98277	43.7921	33.8093	25.8877	48.7782	111.371	62.5924	75.7115	E	0.00014717	0.000183963	0.000220755
1789	Relict	T	10	92.6662	29.5051	98756.4	1322.78	459.476	199.339	Tongue-shaped	4925	5166	241	5045.58	10.8491	40.959	30.1099	28.2203	196.928	255.42	58.4921	224.349	SW
1790	Intact	T	11	92.6663	29.4996	245341	2097.88	372.119	856.725	Lobate-shaped	4889	5022	133	4948.66	0.777566	31.5543	30.7767	15.8867	0	358.264	358.264	72.6559	E	0.00333424	0.00416781	0.00500137
1791	Intact	T	10	92.6664	29.2633	68758.2	1233.23	178.601	497.68	Lobate-shaped	4669	4741	72	4708.66	4.71934	31.4303	26.711	16.7615	0	359.433	359.433	237.185	SW	0.000724539	0.000905674	0.00108681
1792	Intact	T	12	92.6664	29.5469	40553.6	1040.78	446.001	125.023	Tongue-shaped	5185	5299	114	5238.69	5.05034	34.3354	29.2851	16.7911	231.605	345.964	114.359	280.029	W	0.00038451	0.000480637	0.000576765
1793	Intact	T	12	92.6666	29.5144	40697.1	892.69	330.782	217.583	Tongue-shaped	5206	5312	106	5241.55	10.3701	35.4824	25.1123	19.7207	1.84761	359.236	357.389	256.994	W	0.000386144	0.00048268	0.000579215
1794	Intact	T	14	92.6672	29.6116	158990	1826.2	572.55	358.02	Tongue-shaped	5111	5296	185	5178.04	1.77267	41.1018	39.3292	18.0831	0	356.186	356.186	47.5487	NE	0.00198114	0.00247642	0.00297171
1795	Intact	T	10	92.6676	29.443	28812.6	638.998	227.321	165.342	Tongue-shaped	5321	5440	119	5372.46	17.0527	44.2645	27.2117	30.2937	94.7636	132.019	37.2549	111.167	E	0.000255136	0.00031892	0.000382704
1796	Intact	T	12	92.6676	29.4624	163167	1744.88	322.762	655.906	Lobate-shaped	5277	5453	176	5378.65	1.25366	51.5455	50.2918	23.6544	18.4349	330.695	312.26	287.073	W	0.00204376	0.0025547	0.00306564
1797	Intact	T	11	92.6683	29.5428	12293.5	447.19	85.0848	176.505	Lobate-shaped	5300	5349	49	5322.93	16.9486	32.7804	15.8319	25.2044	2.29061	359.384	357.093	72.2779	E	9.18081e-05	0.00011476	0.000137712
1798	Intact	D	13	92.6684	29.4893	545988	3038.96	1108.36	449.867	Tongue-shaped	4861	5198	337	5003.48	1.77267	51.9994	50.2267	17.2738	0	359.421	359.421	71.7624	E	0.00870748	0.0108843	0.0130612
1799	Intact	T	11	92.6686	29.4501	55899.7	1418.62	623.207	112.043	Tongue-shaped	5272	5385	113	5315.09	4.93039	38.1466	33.2162	19.6027	70.56	176.517	105.957	120.206	SE	0.00056515	0.000706437	0.000847725
1800	Intact	T	10	92.669	29.3597	57970.1	976.895	326.772	227.603	Tongue-shaped	5111	5279	168	5160.96	7.00646	52.5414	45.535	23.3451	1.63658	355.732	354.096	79.1356	E	0.000590361	0.000737951	0.000885541
1801	Relict	T	10	92.669	29.5015	16732.9	521.198	201.564	99.407	Tongue-shaped	4927	5001	74	4961.62	16.3625	36.7805	20.418	23.9981	211.651	250.301	38.6501	230.162	SW
1802	Intact	T	12	92.6697	29.609	91546.8	1360.89	224.041	550.512	Lobate-shaped	5155	5305	150	5222.4	0	39.9057	39.9057	18.8178	-1	358.898	359.898	127.057	SE	0.00102151	0.00127689	0.00153227
1803	Intact	T	12	92.6699	29.5859	24782.2	633.97	126.589	238.735	Lobate-shaped	4963	4996	33	4978.22	8.86934	26.3779	17.5086	15.6805	1.88819	358.919	357.031	256.36	W	0.000212932	0.000266165	0.000319398
1804	Intact	T	11	92.6701	29.5983	62938.6	1124.16	199.896	419.505	Lobate-shaped	5296	5332	36	5310.54	2.45752	35.593	33.1354	12.6248	3.17983	355.914	352.735	304.429	NW	0.000651588	0.000814485	0.000977381
1805	Intact	T	11	92.6702	29.5126	72169	1306.13	144.053	456.276	Lobate-shaped	5305	5396	91	5353.29	1.09958	30.0024	28.9028	14.5032	180	351.027	171.027	303.363	NW	0.00076788	0.00095985	0.00115182
1806	Intact	T	12	92.6702	29.3038	117594	1368.26	452.788	242.466	Tongue-shaped	5018	5168	150	5087.11	5.96148	54.7653	48.8038	20.2621	1.44412	359.465	358.02	86.5877	E	0.00137954	0.00172443	0.00206931
1807	Intact	T	11	92.6705	29.2654	119783	1536.1	600.963	209.478	Tongue-shaped	4640	4884	244	4726.94	1.09958	49.7681	48.6685	21.7499	1.10171	358.382	357.28	238.738	SW	0.00141041	0.00176302	0.00211562
1808	Intact	T	10	92.6708	29.3579	70950.6	1039.3	229.84	321.894	Lobate-shaped	5127	5242	115	5164.2	3.20284	48.9061	45.7032	22.0481	2.60256	94.3987	91.7961	38.6746	NE	0.00075235	0.000940438	0.00112853
1809	Intact	D	13	92.671	29.7323	211741	3113.22	193.437	1431.14	Lobate-shaped	5124	5385	261	5261.48	1.25366	40.7129	39.4593	13.1629	0	359.427	359.427	99.0209	E	0.00279408	0.0034926	0.00419112
1810	Intact	T	11	92.6714	29.5588	564431	4495.69	301.287	1994.43	Lobate-shaped	5031	5251	220	5161.31	1.04316	45.1888	44.1456	14.5098	0	359.119	359.119	106.364	E	0.00906161	0.011327	0.0135924
1811	Intact	T	10	92.6715	29.678	119464	1908.1	191.956	836.528	Lobate-shaped	5241	5365	124	5291.77	2.02692	39.876	37.8491	20.9453	0	358.755	358.755	51.4085	NE	0.0014059	0.00175738	0.00210885
1812	Intact	T	11	92.6718	29.3749	93163.2	1195.81	410.269	254.176	Tongue-shaped	5194	5269	75	5226.11	1.25366	36.9319	35.6783	15.2579	0	358.264	358.264	205.841	SW	0.0010432	0.00130399	0.00156479
1813	Intact	T	9	92.6721	29.2451	26019.1	679.235	269.641	114.272	Tongue-shaped	4884	5008	124	4950.67	12.3486	42.1667	29.818	26.0395	44.0608	104.826	60.7657	66.1126	NE	0.000225747	0.000282184	0.000338621
1814	Intact	D	10	92.6722	29.378	152927	1804.44	779.125	234.425	Tongue-shaped	5131	5296	165	5218.86	3.14593	45.8874	42.7415	17.0574	203.629	351.741	148.111	286.765	W	0.00189084	0.00236355	0.00283626
1815	Intact	T	10	92.6724	29.2665	52183.6	906.639	297.366	235.849	Tongue-shaped	4624	4716	92	4658.52	3.54195	37.0348	33.4928	15.9199	0	359.444	359.444	162.357	S	0.000520371	0.000650464	0.000780557
1816	Intact	T	10	92.6725	29.3042	29604.3	661.837	193.654	165.769	Tongue-shaped	5026	5095	69	5051.42	3.47333	39.3431	35.8698	16.7104	10.008	346.724	336.716	314.998	NW	0.000263571	0.000329464	0.000395357
1817	Intact	D	11	92.6726	29.5771	46133.2	1196.69	524.131	110.349	Tongue-shaped	5248	5389	141	5317.76	9.1995	36.0543	26.8548	22.2525	13.1726	357.049	343.877	82.5739	E	0.000448838	0.000561047	0.000673256
1818	Intact	T	11	92.673	29.5979	27448	749.556	284.082	122.928	Tongue-shaped	5360	5492	132	5412.97	16.9105	40.1379	23.2274	26.6037	288.631	345.838	57.2067	321.191	NW	0.000240705	0.000300881	0.000361057
1819	Intact	T	11	92.6731	29.5194	45921.6	903.524	178.311	318.424	Lobate-shaped	5207	5307	100	5257.15	14.1172	41.1649	27.0477	28.1082	2.96823	347.811	344.843	306.113	NW	0.000446367	0.000557959	0.000669551
1820	Intact	T	12	92.6732	29.4474	105041	1505.11	572.341	173.968	Tongue-shaped	5133	5355	222	5235.85	11.4069	43.9126	32.5057	21.5056	24.2539	116.996	92.7419	75.11	E	0.00120477	0.00150596	0.00180715
1821	Intact	T	10	92.6735	29.3543	56230.3	881.752	256.923	286.922	Lobate-shaped	5170	5256	86	5213.21	1.47509	34.8181	33.343	19.6229	0	192.995	192.995	61.1104	NE	0.000569163	0.000711454	0.000853744
1822	Intact	T	10	92.6736	29.5826	38326	878.859	126.529	365.583	Lobate-shaped	5116	5185	69	5153.73	1.73826	40.6374	38.8991	19.5847	1.54816	353.032	351.484	199.006	S	0.000359306	0.000449133	0.000538959
1823	Intact	D	11	92.6736	29.5787	46249.9	992.169	376.907	112.809	Tongue-shaped	5224	5309	85	5258.1	2.80149	37.0277	34.2262	16.008	0	358.781	358.781	227.523	SW	0.0004502	0.00056275	0.0006753
1824	Intact	T	11	92.6736	29.5507	112550	1355.5	322.125	454.21	Lobate-shaped	5167	5262	95	5217.42	1.04316	29.607	28.5638	12.5121	0	358.877	358.877	78.932	E	0.00130885	0.00163606	0.00196327
1825	Intact	T	11	92.6739	29.5138	36226	793.306	170.053	287.251	Lobate-shaped	5384	5456	72	5404.39	3.62587	32.7189	29.0931	14.9861	216.254	337.249	120.995	276.564	W	0.000335812	0.000419766	0.000503719
1826	Intact	T	11	92.6742	29.4916	28082.5	762.505	291.576	110.486	Tongue-shaped	4844	5011	167	4930.97	18.2886	43.8585	25.5699	31.6282	214.611	256.032	41.4211	234.607	SW	0.000247398	0.000309247	0.000371096
1827	Relict	T	13	92.6743	29.4814	74987.8	1389.07	505.752	258.312	Tongue-shaped	4941	5224	283	5059.52	13.4351	45.145	31.7099	28.0688	19.1955	80.9097	61.7143	52.7475	NE
1828	Intact	T	12	92.6744	29.5576	92949.2	1151.14	324.37	362.306	Lobate-shaped	5164	5235	71	5193.68	1.73826	23.2468	21.5086	10.9639	4.76364	354.094	349.33	256.953	W	0.00104032	0.0013004	0.00156048
1829	Intact	T	10	92.6745	29.3825	54820.3	1146.19	121.709	436.572	Lobate-shaped	5198	5271	73	5229.86	4.5248	28.0336	23.5088	15.4158	0	358.152	358.152	304.608	NW	0.000552081	0.000690101	0.000828121
1830	Intact	T	10	92.6746	29.4968	129527	1943.39	736.291	147.902	Tongue-shaped	4909	5168	259	5069.03	1.43355	35.3958	33.9622	19.1741	4.3987	358.831	354.432	240.511	SW	0.00154919	0.00193649	0.00232379
1831	Intact	D	12	92.6748	29.547	94720.8	1216.83	397.26	241.015	Tongue-shaped	5213	5351	138	5282.81	2.98883	37.9198	34.9309	19.5019	0	358.668	358.668	61.3206	NE	0.00106416	0.0013302	0.00159624
1832	Intact	T	11	92.6752	29.5556	28698.7	812.867	329.832	110.775	Tongue-shaped	5164	5302	138	5213.14	5.6428	38.7595	33.1167	23.5114	194.421	289.654	95.233	251.962	W	0.000253926	0.000317407	0.000380889
1833	Intact	T	10	92.6752	29.4904	42637.1	779.185	218.71	202.726	Tongue-shaped	4842	4944	102	4899.14	11.9933	46.2906	34.2973	25.1416	209.476	249.376	39.9006	227.472	SW	0.000408336	0.00051042	0.000612503
1834	Intact	T	10	92.6758	29.415	60569	1058.71	172.279	413.06	Lobate-shaped	4825	4999	174	4930.89	8.70935	35.965	27.2556	23.5209	0.629598	357.879	357.249	272.041	W	0.000622261	0.000777827	0.000933392
1835	Intact	T	10	92.6762	29.4456	64630.4	1019.86	197.829	361.993	Lobate-shaped	5082	5183	101	5120	5.60032	45.4509	39.8506	19.9226	33.8571	171.87	138.013	73.8321	E	0.000672662	0.000840828	0.00100899
1836	Intact	T	13	92.6767	29.7004	314774	2716.86	722.385	473.307	Tongue-shaped	5171	5383	212	5283.03	0.983516	35.11	34.1265	15.7302	0	358.939	358.939	104.231	E	0.00449646	0.00562058	0.00674469
1837	Intact	D	11	92.6769	29.5452	20833.3	546.209	183.391	119.724	Tongue-shaped	5310	5378	68	5338.2	10.3477	42.9638	32.6161	22.8956	281.659	349.641	67.9817	318.085	NW	0.000172895	0.000216119	0.000259343
1838	Intact	T	11	92.677	29.6749	168702	2073.78	827.373	181.282	Tongue-shaped	5257	5520	263	5370.55	3.10741	43.9864	40.879	22.5255	10.561	337.443	326.882	85.729	E	0.00212724	0.00265905	0.00319086
1839	Intact	D	11	92.6774	29.3794	100848	1296.61	519.647	224.746	Tongue-shaped	5251	5373	122	5308.45	1.77267	38.3571	36.5845	15.119	85.6013	338.749	253.148	267.225	W	0.0011473	0.00143412	0.00172094
1840	Intact	T	11	92.6774	29.3893	45133.6	1042.71	121.191	370.947	Lobate-shaped	5262	5333	71	5284.06	2.45752	42.6851	40.2276	21.8189	216.027	342.699	126.672	323.288	NW	0.000437192	0.00054649	0.000655788
1841	Intact	D	11	92.6779	29.5214	124944	1553.92	602.89	253.121	Tongue-shaped	5217	5267	50	5237.64	0.491794	23.4611	22.9693	8.52404	0	359.326	359.326	209.963	SW	0.00148365	0.00185457	0.00222548
1842	Intact	T	10	92.6779	29.3824	67505.6	1055.69	272.843	323.198	Lobate-shaped	5250	5331	81	5286.64	4.5248	50.7366	46.2118	15.6584	284.859	344.148	59.2895	312.784	NW	0.00070873	0.000885912	0.00106309
1843	Relict	D	12	92.6788	29.4777	300013	2795.86	1096.6	275.961	Tongue-shaped	4756	5226	470	5016.94	4.62959	48.3825	43.7529	24.3071	0.784824	357.33	356.545	53.397	NE
1844	Intact	T	12	92.6792	29.5846	125518	1624.02	241.779	603.746	Lobate-shaped	4985	5064	79	5018.15	2.22563	37.7289	35.5033	15.425	0	359.293	359.293	109.352	E	0.00149183	0.00186479	0.00223775
1845	Intact	T	11	92.68	29.6475	399327	3065.09	1324.18	374.252	Tongue-shaped	5059	5323	264	5221.5	1.04316	34.697	33.6538	13.506	12.9946	349.695	336.701	238.167	SW	0.00598229	0.00747786	0.00897343
1846	Intact	T	11	92.68	29.5517	59617.1	1201.57	152.745	513.829	Lobate-shaped	5291	5399	108	5336.43	11.0385	33.3676	22.3291	20.9692	206.222	276.981	70.7591	239.945	SW	0.000610545	0.000763181	0.000915817
1847	Intact	T	10	92.6801	29.29	69465.1	1048.8	383.777	190.472	Tongue-shaped	4967	5158	191	5070.68	14.0102	42.1346	28.1245	28.7694	285.852	348.536	62.6841	325.07	NW	0.000733487	0.000916858	0.00110023
1848	Intact	D	11	92.6801	29.5482	28180.1	636.099	163.145	239.691	Lobate-shaped	5318	5388	70	5354.59	7.44872	39.7625	32.3138	25.6659	265.601	323.017	57.4158	287.399	W	0.00024843	0.000310537	0.000372645
1849	Intact	T	11	92.6806	29.6142	33987.6	984.932	105.136	445.317	Lobate-shaped	5380	5479	99	5425.15	5.30449	31.5443	26.2398	15.7447	146.31	254.56	108.25	203.044	SW	0.000311069	0.000388836	0.000466604
1850	Intact	T	10	92.6809	29.4535	27498.6	902.895	106.295	396.878	Lobate-shaped	5282	5356	74	5317.44	14.4597	35.9545	21.4949	24.9202	248.703	299.219	50.5166	279.015	W	0.000241238	0.000301548	0.000361857
1851	Intact	T	12	92.6812	29.5108	32091.8	689.904	197.891	167.309	Tongue-shaped	5401	5471	70	5434.51	11.3464	36.4511	25.1047	23.3158	106.798	180	73.2016	140.533	SE	0.000290366	0.000362957	0.000435548
1852	Intact	T	11	92.6813	29.6128	48140.5	984.193	173.452	410.216	Lobate-shaped	5389	5496	107	5431.66	2.33155	42.6374	40.3059	21.4404	202.557	318.302	115.745	269.15	W	0.000472373	0.000590466	0.000708559
1853	Intact	T	10	92.6815	29.4554	12592.5	475.137	83.8654	179.22	Lobate-shaped	5336	5370	34	5353.2	9.31305	30.6555	21.3424	21.3195	210.51	280.305	69.7946	256.4	W	9.44944e-05	0.000118118	0.000141742
1854	Intact	T	11	92.6818	29.4991	44288.7	1231.24	107.157	538.923	Lobate-shaped	5206	5388	182	5308.36	11.9885	41.0357	29.0472	24.1739	221.186	332.418	111.232	280.828	W	0.00042739	0.000534237	0.000641085
1855	Intact	T	13	92.6823	29.4835	62010.8	1084.18	403.511	191.842	Tongue-shaped	4781	5020	239	4877.03	15.6032	43.8099	28.2067	30.5657	197.784	238.87	41.0858	213.302	SW	0.000640079	0.000800098	0.000960118
1856	Intact	T	11	92.6824	29.5576	66970.6	1104.2	213.975	394.99	Lobate-shaped	5317	5408	91	5361.63	5.54676	31.2177	25.6709	15.5686	18.4349	140.711	122.276	63.6683	NE	0.000701995	0.000877493	0.00105299
1857	Intact	T	12	92.6828	29.2966	69913.7	1130.52	197.532	475.826	Lobate-shaped	4858	4933	75	4888.1	0.983516	34.5406	33.5571	20.9203	21.8014	358.995	337.193	269.771	W	0.000739175	0.000923969	0.00110876
1858	Intact	T	10	92.6829	29.3159	21412.5	627.341	120.017	210.702	Lobate-shaped	5089	5168	79	5120.22	10.7905	33.7913	23.0008	22.9554	97.7652	279.951	182.185	244.375	SW	0.000178679	0.000223349	0.000268019
1859	Intact	T	11	92.6829	29.3255	292984	2237.56	541.064	713.683	Lobate-shaped	4989	5175	186	5046.96	2.80149	39.207	36.4055	17.0949	0	351.027	351.027	52.5218	NE	0.00412558	0.00515698	0.00618838
1860	Intact	D	11	92.683	29.3874	195782	1758.01	585.713	505.72	Tongue-shaped	5325	5510	185	5403.72	4.22301	52.3269	48.1039	20.2184	151.699	317.77	166.071	249.198	W	0.00254331	0.00317914	0.00381496
1861	Intact	T	12	92.6832	29.6596	131127	2389.33	142.148	1078.24	Lobate-shaped	5287	5451	164	5360.61	3.42096	53.9405	50.5196	20.9359	131.634	317.291	185.657	247.567	W	0.00157218	0.00196522	0.00235827
1862	Intact	T	11	92.6833	29.5095	31286.5	694.807	206.842	141.392	Tongue-shaped	5361	5483	122	5406.37	14.3052	42.6764	28.3712	29.5158	198.178	250.427	52.2489	227.469	SW	0.000281645	0.000352056	0.000422467
1863	Intact	T	10	92.6834	29.4081	70451.4	1266.12	137.808	511.649	Lobate-shaped	5044	5138	94	5079.2	1.73826	41.5118	39.7736	21.5654	11.3099	77.0054	65.6955	41.7533	NE	0.000746002	0.000932503	0.001119
1864	Relict	D	12	92.6841	29.5787	95822.1	2153.13	957.555	158.131	Tongue-shaped	5023	5336	313	5205.17	4.06359	42.1308	38.0672	19.5894	3.99091	359.341	355.351	120.917	SE
1865	Intact	T	10	92.6845	29.4499	31113.4	1016.15	447.556	75.6503	Tongue-shaped	5214	5379	165	5275.47	10.6125	36.1516	25.5391	21.0008	114.444	200.898	86.4538	158.465	S	0.000279776	0.00034972	0.000419664
1866	Intact	T	12	92.6846	29.5063	60504.3	1040.93	290.471	166.246	Tongue-shaped	5290	5383	93	5338.15	6.89557	31.3585	24.4629	18.3113	197.904	280.886	82.9811	235.559	SW	0.000621464	0.00077683	0.000932196
1867	Intact	T	11	92.6851	29.5034	100128	1378.49	372.778	244.253	Tongue-shaped	5256	5406	150	5320	1.73826	45.1971	43.4589	20.6247	8.1301	338.962	330.832	262.964	W	0.00113747	0.00142184	0.00170621
1868	Intact	T	10	92.6855	29.4554	27154	670.303	245.177	122.51	Tongue-shaped	5262	5332	70	5292.42	5.93141	46.342	40.4106	19.2616	57.6927	137.386	79.6933	103.761	E	0.000237615	0.000297019	0.000356422
1869	Intact	T	12	92.6857	29.5053	42008.9	1023.65	414.388	134.228	Tongue-shaped	5313	5453	140	5381.04	10.4976	43.0961	32.5985	21.0339	216.674	351.357	134.683	259.234	W	0.000401127	0.000501409	0.000601691
1870	Intact	T	12	92.6861	29.3613	163665	1632.29	439.297	505.67	Lobate-shaped	5194	5278	84	5224.42	1.39077	37.5366	36.1459	12.1482	0	358.877	358.877	256.821	W	0.00205125	0.00256406	0.00307688
1871	Intact	T	10	92.6865	29.3416	46109.5	1098.48	143.638	475.167	Lobate-shaped	5217	5276	59	5235.64	2.77989	46.6308	43.8509	20.5156	80.5377	352.569	272.031	268.392	W	0.000448561	0.000560701	0.000672841
1872	Intact	D	10	92.6867	29.5505	63127.9	1185.26	427.979	172.803	Tongue-shaped	5256	5415	159	5317.95	2.19835	38.8305	36.6321	17.0043	21.3706	338.962	317.592	76.6311	E	0.00065394	0.000817425	0.00098091
1873	Intact	T	11	92.687	29.4987	40009.2	877.065	125.668	360.246	Lobate-shaped	5324	5371	47	5346.15	9.60883	28.9263	19.3175	19.4545	71.0535	161.175	90.1218	117.417	SE	0.000378324	0.000472905	0.000567486
1874	Relict	T	9	92.687	29.4273	74373.5	1470.05	657.809	110.12	Tongue-shaped	4928	5140	212	5058.65	8.05754	35.7482	27.6907	20.6924	0	358.506	358.506	170.733	S
1875	Relict	D	10	92.687	29.467	170162	2095.11	910.61	295.757	Tongue-shaped	4902	5224	322	5037.47	6.65022	36.975	30.3247	20.2083	0	359.556	359.556	195.61	S
1876	Intact	T	11	92.6871	29.4926	58893.3	1154.79	482.453	165.013	Tongue-shaped	5198	5328	130	5256.58	13.7485	32.0315	18.283	21.5575	97.284	141.809	44.525	118.181	SE	0.000601661	0.000752076	0.000902491
1877	Intact	T	10	92.6875	29.4519	8475.41	372.303	133.806	63.9829	Tongue-shaped	5136	5203	67	5172.7	25.4176	40.4622	15.0446	31.5556	98.0047	136.364	38.3592	112.741	SE	5.87578e-05	7.34473e-05	8.81367e-05
1878	Intact	D	12	92.6876	29.6372	148587	1960.66	708.316	267.35	Tongue-shaped	5091	5295	204	5201.28	4.39024	41.5145	37.1243	19.4534	199.29	351.87	152.58	281.206	W	0.00182663	0.00228329	0.00273995
1879	Intact	D	13	92.6879	29.6282	191743	1665.57	550.712	431.895	Tongue-shaped	5146	5259	113	5213.51	1.77267	33.8663	32.0936	13.72	0	359.549	359.549	180.336	S	0.00248048	0.00310061	0.00372073
1880	Intact	T	12	92.688	29.4529	65486.4	1035.33	332.384	186.537	Tongue-shaped	5139	5258	119	5211.18	10.9337	36.3203	25.3866	21.343	85.9144	227.564	141.649	151.678	SE	0.000683366	0.000854208	0.00102505
1881	Intact	T	9	92.6883	29.5305	60778.3	961.476	209.291	334.221	Lobate-shaped	5222	5284	62	5249.33	6.6144	25.7049	19.0905	16.1112	235.784	331.699	95.9149	265.594	W	0.000624843	0.000781053	0.000937264
1882	Intact	T	12	92.6886	29.4891	251997	2680.9	292.418	1076.84	Lobate-shaped	5034	5260	226	5149.18	0.347755	37.3201	36.9724	14.3531	2.38594	356.496	354.111	253.114	W	0.00344308	0.00430385	0.00516462
1883	Intact	T	11	92.689	29.3206	107430	1320.37	275.659	499.289	Lobate-shaped	5028	5110	82	5064.47	3.14593	37.9736	34.8277	17.0241	0	359.256	359.256	94.2125	E	0.00123772	0.00154715	0.00185658
1884	Intact	T	9	92.6895	29.8284	44773.4	970.495	396.935	148.091	Tongue-shaped	4953	5203	250	5063.22	17.5712	44.423	26.8518	31.082	271.685	345.217	73.5326	310.059	NW	0.000433008	0.000541261	0.000649513
1885	Intact	T	10	92.69	29.2921	43775.5	794.999	259.329	168.805	Tongue-shaped	5017	5137	120	5058.71	7.2963	47.4158	40.1195	22.9496	0	357.51	357.51	76.4731	E	0.000421453	0.000526816	0.00063218
1886	Intact	D	11	92.6903	29.4138	58114	1030.53	437.256	167.838	Tongue-shaped	5235	5361	126	5281.96	2.11438	47.0731	44.9587	18.0464	0.830315	358.831	358.001	216.483	SW	0.00059212	0.000740149	0.000888179
1887	Relict	T	14	92.6905	29.5721	148317	1861.61	216.596	779.836	Lobate-shaped	5083	5168	85	5130.88	0.983516	19.8301	18.8466	10.404	0	358.995	358.995	239.897	SW
1888	Intact	D	11	92.6905	29.55	71929.3	1343.99	216.755	530.054	Lobate-shaped	5220	5333	113	5267.09	3.49062	28.7941	25.3035	13.6863	2.07003	100.305	98.2348	50.2196	NE	0.000764821	0.000956026	0.00114723
1889	Intact	D	10	92.691	29.6398	136444	1935.67	160.903	862.303	Lobate-shaped	5170	5321	151	5250.36	1.43355	32.4256	30.9921	16.0313	0	358.781	358.781	246.855	SW	0.00164899	0.00206124	0.00247349
1890	Intact	T	11	92.6915	29.3627	60017.6	965.264	175.302	350.824	Lobate-shaped	5231	5327	96	5269.51	6.6144	57.806	51.1916	24.6631	272.121	339.362	67.2414	312.666	NW	0.00061547	0.000769338	0.000923205
1891	Intact	T	10	92.6923	29.2947	27050.1	686.936	99.2797	278.654	Lobate-shaped	4921	4979	58	4950.41	7.27193	29.1212	21.8493	18.59	4.21418	359.145	354.931	278.311	W	0.000236524	0.000295655	0.000354786
1892	Intact	T	12	92.6926	29.5123	84894	1257.32	397.284	234.153	Tongue-shaped	5334	5447	113	5387.82	0.983516	30.1253	29.1418	16.9094	3.57633	342.897	339.321	103.609	E	0.000933093	0.00116637	0.00139964
1893	Intact	T	12	92.693	29.4968	85980.6	1610.71	143.865	694.479	Lobate-shaped	5270	5380	110	5327.73	2.19835	44.3828	42.1845	24.6368	169.216	309.289	140.074	245.763	SW	0.000947443	0.0011843	0.00142116
1894	Intact	T	12	92.6937	29.5093	89387.2	1312.6	497.7	209.223	Tongue-shaped	5290	5424	134	5351.03	3.74016	31.7626	28.0225	17.6408	52.5946	169.824	117.23	116.511	SE	0.000992666	0.00124083	0.001489
1895	Intact	T	11	92.6937	29.3222	131545	1466.14	482.772	322.043	Tongue-shaped	4943	5057	114	5010.23	1.96645	24.7065	22.7401	13.9284	0	359.193	359.193	103.74	E	0.0015782	0.00197275	0.0023673
1896	Intact	D	12	92.6939	29.3527	237325	2200.88	798.213	442.728	Tongue-shaped	5182	5441	259	5273.99	0.983516	51.5998	50.6163	21.0901	3.57633	305.538	301.961	84.9357	E	0.00320394	0.00400492	0.00480591
1897	Intact	T	8	92.6942	29.56	32560.1	892.159	127.231	356.784	Lobate-shaped	5349	5384	35	5363.68	1.25366	15.0882	13.8346	8.06436	220.426	346.264	125.838	281.154	W	0.000295457	0.000369322	0.000443186
1898	Relict	D	11	92.6942	29.4648	107558	1420.46	541.399	155.681	Tongue-shaped	4889	5118	229	5020.34	9.07156	38.0758	29.0043	24.5291	1.04163	353.66	352.618	65.554	NE
1899	Intact	T	10	92.6946	29.5348	36072	805.741	235.944	157.897	Tongue-shaped	5175	5251	76	5209.6	4.66827	25.7742	21.1059	15.495	1.04163	345.141	344.1	50.9289	NE	0.000334101	0.000417626	0.000501151
1900	Intact	T	11	92.6947	29.4846	58803.9	1075.54	443.201	134.737	Tongue-shaped	5184	5300	116	5223	4.23721	46.0378	41.8006	16.1623	41.3322	152.281	110.949	101.037	E	0.000600565	0.000750706	0.000900848
1901	Intact	T	10	92.6949	29.5332	38323.9	778.604	178.248	277.311	Lobate-shaped	5199	5255	56	5224.16	5.89107	24.5582	18.6671	13.9867	1.54816	354.611	353.063	57.6337	NE	0.000359283	0.000449104	0.000538925
1902	Intact	T	10	92.6956	29.3205	42648.1	928.382	271.909	151.307	Tongue-shaped	5010	5105	95	5054.2	8.72952	35.3493	26.6198	19.9421	0	355.992	355.992	84.7902	E	0.000408462	0.000510578	0.000612693
1903	Intact	T	11	92.6967	29.3677	94344.9	1129.36	321.533	326.038	Lobate-shaped	5285	5451	166	5336.01	1.47509	54.4422	52.9671	24.986	0	346.827	346.827	278.284	W	0.00105909	0.00132387	0.00158864
1904	Intact	T	11	92.6967	29.4835	18327.3	669.987	235.051	114.501	Tongue-shaped	5154	5216	62	5176.95	6.92989	44.5433	37.6134	18.1709	34.6242	132.138	97.5134	86.9253	E	0.000148249	0.000185311	0.000222374
1905	Intact	D	12	92.6968	29.5307	122823	1307.05	445.854	313.945	Tongue-shaped	5228	5365	137	5287.52	1.55485	51.3241	49.7693	18.7884	0	359.193	359.193	197.687	S	0.00145348	0.00181685	0.00218022
1906	Intact	T	11	92.6974	29.4826	30158.1	696.666	185.838	179.919	Tongue-shaped	5115	5201	86	5151.38	9.72324	43.9086	34.1854	21.1809	53.0491	122.196	69.1467	78.8676	E	0.000269499	0.000336874	0.000404249
1907	Intact	T	9	92.6975	29.4118	247772	2044.26	607.643	421.216	Tongue-shaped	5214	5399	185	5281.75	0.777566	53.5114	52.7338	21.1461	0	359.454	359.454	206.907	SW	0.00337392	0.0042174	0.00506088
1908	Intact	T	11	92.6977	29.5965	154103	1734.53	462.783	346.463	Tongue-shaped	5277	5372	95	5334.7	2.08564	32.4753	30.3896	13.4245	0	359.326	359.326	262.656	W	0.0019083	0.00238538	0.00286245
1909	Intact	T	11	92.6979	29.3204	95853.2	1273.68	309.085	413.96	Lobate-shaped	5021	5090	69	5062.17	0	32.6444	32.6444	11.8648	-1	359.029	360.029	143.063	SE	0.00107945	0.00134931	0.00161917
1910	Intact	T	11	92.698	29.3741	23274.3	607.284	224.101	121.945	Tongue-shaped	5358	5435	77	5388.71	14.1172	61.7791	47.6619	27.5054	268.305	332.475	64.1694	294.053	NW	0.00019748	0.00024685	0.00029622
1911	Intact	D	11	92.698	29.72	120204	1575.33	597.412	191.808	Tongue-shaped	5087	5215	128	5157.16	0.777566	33.4923	32.7147	15.2602	0	359.444	359.444	188.079	S	0.00141637	0.00177046	0.00212456
1912	Intact	T	11	92.698	29.5188	73559.6	1597.62	153.295	731.713	Lobate-shaped	5270	5369	99	5334.95	1.09958	27.0472	25.9477	14.6001	8.97263	210.069	201.096	67.3582	NE	0.00078567	0.000982087	0.0011785
1913	Intact	T	10	92.6982	29.5149	27217.7	753.888	103.042	304.184	Lobate-shaped	5332	5365	33	5348.61	10.2125	28.4303	18.2178	18.8855	166.891	228.731	61.8406	209.96	SW	0.000238284	0.000297855	0.000357426
1914	Intact	T	12	92.6983	29.5615	24598.1	583.73	170.846	179.32	Lobate-shaped	5361	5415	54	5389.6	9.30678	28.379	19.0722	19.6167	101.31	176.785	75.4746	149.502	SE	0.000211035	0.000263794	0.000316553
1915	Intact	T	10	92.6983	29.4881	95186	1865.35	145.21	843.701	Lobate-shaped	5157	5306	149	5224.16	7.72892	35.3444	27.6155	17.5581	58.7608	126.327	67.566	89.6548	E	0.00107043	0.00133804	0.00160565
1916	Intact	T	9	92.6985	29.4204	49112	1117.94	114.816	455.756	Lobate-shaped	5109	5182	73	5153.1	0.695485	32.2256	31.5301	15.5804	52.125	321.582	269.457	266.094	W	0.000483836	0.000604794	0.000725753
1917	Intact	T	12	92.6986	29.6377	83251.6	1221.7	476.851	192.307	Tongue-shaped	5264	5465	201	5358.41	5.76831	41.1711	35.4027	24.8082	1.88819	358.708	356.82	285.183	W	0.000911473	0.00113934	0.00136721
1918	Intact	T	9	92.6988	29.4235	37096.7	850.371	130.584	325.51	Lobate-shaped	5092	5143	51	5115.89	6.50571	34.3354	27.8297	19.3137	250.201	336.194	85.9929	284.026	W	0.000345522	0.000431902	0.000518283
1919	Intact	T	11	92.6988	29.5677	23139.4	559.221	168.77	183.967	Lobate-shaped	5280	5337	57	5313.75	4.19449	28.8295	24.635	16.3203	42.6141	118.301	75.6867	87.1996	E	0.000196108	0.000245135	0.000294162
1920	Intact	D	10	92.7	29.5298	33786.9	763.597	300.679	147.648	Tongue-shaped	5297	5434	137	5343.71	13.1431	48.3075	35.1644	24.8731	281.056	334.776	53.7197	303.559	NW	0.000308867	0.000386083	0.0004633
1921	Intact	T	10	92.7002	29.3434	76164.1	1045.07	297.046	284.141	Tongue-shaped	5079	5258	179	5161.53	15.4516	41.3133	25.8617	28.6396	11.3099	66.1757	54.8658	41.6249	NE	0.000819168	0.00102396	0.00122875
1922	Intact	T	12	92.7007	29.6384	40102.1	756.01	195.843	226.912	Lobate-shaped	5278	5362	84	5315.18	11.6601	44.1278	32.4676	26.0026	1.90915	357.709	355.8	309.572	NW	0.000379379	0.000474224	0.000569068
1923	Intact	T	12	92.701	29.4788	86274.4	1285.04	200.889	511.998	Lobate-shaped	4911	5023	112	4975.64	9.5967	31.7194	22.1228	17.4037	187.125	281.136	94.0113	250.525	W	0.00095133	0.00118916	0.00142699
1924	Intact	T	9	92.7014	29.8281	94157.5	1460.26	587.934	139.391	Tongue-shaped	4982	5332	350	5166.21	13.7485	55.6814	41.9329	33.2607	1.0675	359.061	357.993	61.8146	NE	0.00105657	0.00132071	0.00158486
1925	Intact	T	12	92.7014	29.3215	122732	1887.82	695.909	195.367	Tongue-shaped	4894	5060	166	4980.43	1.25366	35.0113	33.7576	13.3898	0	359.256	359.256	149.684	SE	0.00145219	0.00181524	0.00217829
1926	Intact	T	11	92.7017	29.5613	26889.4	683.765	133.993	281.422	Lobate-shaped	5331	5374	43	5348.48	5.6428	28.9774	23.3346	17.8307	16.9275	288.435	271.507	205.89	SW	0.000234839	0.000293549	0.000352258
1927	Relict	T	10	92.7018	29.4647	42260.5	900.392	375.406	137.906	Tongue-shaped	4663	4852	189	4746.38	16.196	40.0557	23.8597	28.748	35.3112	69.8142	34.503	48.2412	NE
1928	Intact	D	10	92.702	29.565	66021.7	1020.39	228.779	357.069	Lobate-shaped	5312	5363	51	5336.81	4.04879	26.617	22.5682	13.0685	0	358.091	358.091	217.54	SW	0.000690076	0.000862595	0.00103511
1929	Intact	T	9	92.702	29.789	35718.7	833.638	127.073	325.511	Lobate-shaped	5100	5164	64	5125.63	10.127	30.2284	20.1013	20.1686	7.85331	61.1134	53.2601	40.4676	NE	0.000330177	0.000412722	0.000495266
1930	Intact	T	10	92.7021	29.5572	74194.5	1533.37	693.272	131.771	Tongue-shaped	5233	5349	116	5290.93	7.09888	24.9022	17.8033	15.3758	37.1467	123.311	86.1639	89.2728	E	0.000793813	0.000992266	0.00119072
1931	Intact	T	10	92.7029	29.4816	22902.4	589.629	221.84	142.154	Tongue-shaped	5035	5168	133	5086.35	20.9067	43.2903	22.3836	32.253	267.955	297.951	29.9964	280.606	W	0.0001937	0.000242125	0.00029055
1932	Intact	T	11	92.7029	29.8295	103893	2012.02	876.231	152.409	Tongue-shaped	4808	5263	455	4996.98	9.93613	46.7311	36.7949	28.5314	0	359.275	359.275	133.786	SE	0.00118899	0.00148623	0.00178348
1933	Intact	D	12	92.7034	29.5365	53421.1	1108.74	435.343	139.341	Tongue-shaped	5237	5334	97	5268.98	0.695485	35.9316	35.2361	12.5249	0	358.727	358.727	183.38	S	0.000535215	0.000669019	0.000802822
1934	Intact	T	10	92.7035	29.4041	85298.4	1327.6	540.444	192.495	Tongue-shaped	5240	5342	102	5290.93	3.62587	24.0101	20.3843	12.2749	16.3895	358.668	342.278	72.6508	E	0.000938429	0.00117304	0.00140764
1935	Intact	T	10	92.7036	29.484	29830.1	798.43	303.858	174.265	Tongue-shaped	5035	5195	160	5095.45	7.27193	43.2968	36.0249	26.5246	209.876	330.255	120.379	269.706	W	0.000265986	0.000332482	0.000398979
1936	Relict	T	10	92.7036	29.4614	82307.3	1212.02	289.222	363.452	Lobate-shaped	4648	4848	200	4719.73	13.6546	43.7438	30.0893	32.0288	34.2157	71.2319	37.0162	51.6466	NE
1937	Intact	T	11	92.7038	29.3599	82448	1217.16	293.338	314.1	Lobate-shaped	5141	5254	113	5189.09	8.7964	29.5578	20.7614	17.0879	28.6861	117.646	88.9598	75.7902	E	0.000900926	0.00112616	0.00135139
1938	Intact	T	11	92.704	29.5172	91462.6	1304.78	397.931	249.915	Tongue-shaped	5199	5303	104	5245.28	5.29321	31.9355	26.6423	12.9928	19.7989	123.69	103.891	75.8839	E	0.00102039	0.00127548	0.00153058
1939	Relict	T	12	92.7041	29.4551	74741.7	1477.82	660.357	133.378	Tongue-shaped	4833	5005	172	4919.5	2.45752	29.0937	26.6362	14.8204	10.8855	137.49	126.604	66.1343	NE
1940	Intact	T	11	92.7046	29.486	23623.8	604.772	225.294	153.996	Tongue-shaped	5089	5169	80	5117.33	13.3554	34.2085	20.8531	21.4462	232.97	298.229	65.2592	275.889	W	0.000201045	0.000251306	0.000301567
1941	Intact	D	11	92.7048	29.7872	270601	3599.94	1548.46	193.93	Tongue-shaped	5129	5392	263	5256.1	1.43355	35.0163	33.5828	14.6971	0	359.484	359.484	182.832	S	0.00375031	0.00468788	0.00562546
1942	Intact	T	10	92.705	29.3018	38340	875.576	113.373	347.555	Lobate-shaped	4811	4885	74	4839.54	4.51153	55.6915	51.18	27.4573	5.19443	351.87	346.675	282.253	W	0.000359463	0.000449329	0.000539195
1943	Intact	T	11	92.7052	29.5284	23083.6	664.643	271.017	98.4382	Tongue-shaped	5299	5416	117	5348.57	12.8479	47.977	35.1291	27.5236	59.9314	128.774	68.8428	88.1397	E	0.000195541	0.000244426	0.000293311
1944	Intact	T	10	92.7057	29.3448	178850	1931.62	261.722	785.144	Lobate-shaped	4941	5113	172	5032.76	0.983516	35.0032	34.0197	15.6027	0	359.526	359.526	151.489	SE	0.00228171	0.00285214	0.00342257
1945	Intact	T	12	92.7058	29.5879	189827	2385.3	196.414	1072.45	Lobate-shaped	5359	5510	151	5434.8	0.777566	38.7603	37.9827	13.6307	3.50353	357.436	353.933	261.895	W	0.00245077	0.00306346	0.00367615
1946	Intact	T	11	92.7059	29.4883	74905.8	1123.82	408.272	200.794	Tongue-shaped	5111	5237	126	5161.34	0.491794	49.1289	48.6371	18.4715	156.801	312.709	155.908	259.869	W	0.000802955	0.00100369	0.00120443
1947	Intact	T	11	92.7063	29.5703	138699	1654.03	358.724	545.879	Lobate-shaped	5184	5380	196	5258.72	2.50613	38.4463	35.9401	20.5499	4.08562	348.69	344.604	275.586	W	0.00168175	0.00210218	0.00252262
1948	Intact	D	11	92.7067	29.5638	59625	1142.27	196.155	477.542	Lobate-shaped	5338	5412	74	5363.41	1.77267	34.9028	33.1301	16.1409	1.50743	356.009	354.502	217.324	SW	0.000610642	0.000763303	0.000915963
1949	Intact	T	11	92.7079	29.5736	181008	1727.32	355.156	633.056	Lobate-shaped	5149	5327	178	5228.74	2.50613	48.084	45.5778	19.1799	0	358.919	358.919	302.568	NW	0.00231479	0.00289348	0.00347218
1950	Intact	T	9	92.708	29.4032	91524.4	1369.19	177.129	505.001	Lobate-shaped	5165	5330	165	5236.09	9.10372	43.0383	33.9345	23.0816	2.00955	356.76	354.751	31.7502	NE	0.00102121	0.00127652	0.00153182
1951	Intact	T	11	92.7083	29.4913	96400.2	1263.1	234.759	473.288	Lobate-shaped	5162	5237	75	5210.47	0.777566	29.6112	28.8337	12.0266	7.12502	353.66	346.535	262.797	W	0.00108684	0.00135855	0.00163026
1952	Intact	T	12	92.7083	29.5933	24021.6	611.892	136.184	206.549	Lobate-shaped	5475	5543	68	5511.86	11.0956	35.1521	24.0565	24.0606	219.726	304.216	84.4896	248.294	W	0.000205114	0.000256393	0.000307671
1953	Intact	D	11	92.7089	29.4221	317797	2953.44	328.525	1264.78	Lobate-shaped	5071	5266	195	5185.3	0.777566	39.0509	38.2733	12.9207	0.93919	358.958	358.019	166.107	S	0.00454834	0.00568543	0.00682251
1954	Intact	T	11	92.709	29.3261	437467	3504.84	405.033	1543.47	Lobate-shaped	4816	5052	236	4915.65	0	44.7767	44.7767	14.3434	-1	359.444	360.444	208.04	SW	0.00667431	0.00834289	0.0100115
1955	Intact	T	11	92.7094	29.3651	61208.4	1086.11	203.64	396.917	Lobate-shaped	5093	5187	94	5123.18	2.02692	39.4659	37.4389	16.207	0	355.462	355.462	72.3693	E	0.000630152	0.00078769	0.000945228
1956	Intact	D	11	92.7099	29.3886	294733	2419.26	818.136	275.75	Tongue-shaped	4991	5245	254	5106.86	1.04316	46.1842	45.141	17.8036	0	359.341	359.341	157.688	S	0.00415516	0.00519395	0.00623274
1957	Intact	T	10	92.71	29.4286	28547.9	789.323	103.519	319.098	Lobate-shaped	5008	5083	75	5038.34	2.9686	30.7566	27.788	15.1037	0	359.17	359.17	301.671	NW	0.000252326	0.000315407	0.000378489
1958	Intact	T	11	92.7101	29.5542	20355.7	550.861	131.97	168.681	Lobate-shaped	5204	5276	72	5245.72	16.6442	42.1564	25.5123	29.5011	278.746	333.232	54.4863	313.399	NW	0.00016815	0.000210188	0.000252225
1959	Intact	T	9	92.7104	29.8112	137290	1750.2	556.746	208.403	Tongue-shaped	5098	5280	182	5187.89	2.86531	28.6475	25.7822	14.9684	0	359.37	359.37	143.686	SE	0.00166127	0.00207658	0.0024919
1960	Intact	T	11	92.7104	29.157	52347.8	1160.82	502.164	108.565	Tongue-shaped	4704	4874	170	4787.5	7.95452	37.7622	29.8077	21.2541	173.991	270.764	96.7729	224.975	SW	0.000522336	0.00065292	0.000783504
1961	Intact	T	10	92.7105	29.2972	82089.7	1292.45	251.782	513.307	Lobate-shaped	4859	5074	215	4939.74	8.35856	49.6352	41.2766	25.836	3.69139	359.454	355.763	273.973	W	0.000896229	0.00112029	0.00134434
1962	Intact	T	10	92.7107	29.4108	58027.2	1172.91	170.992	472.799	Lobate-shaped	5161	5221	60	5195.81	4.18015	35.6727	31.4926	16.7423	0	359.356	359.356	72.3662	E	0.000591058	0.000738822	0.000886587
1963	Intact	T	12	92.7109	29.469	101070	1689.45	248.238	694.379	Lobate-shaped	4897	5071	174	4980.53	5.6428	34.6856	29.0428	19.4074	176.634	313.531	136.898	258.921	W	0.00115032	0.00143789	0.00172547
1964	Intact	T	11	92.7109	29.4949	35260.9	724.314	164.354	257.996	Lobate-shaped	5235	5296	61	5272.12	5.96148	34.9394	28.9779	17.5158	196.821	355.101	158.28	289.355	W	0.000325106	0.000406383	0.000487659
1965	Intact	T	9	92.7115	29.8146	26752.8	658.449	230.111	143.826	Tongue-shaped	5051	5196	145	5099.94	9.65115	56.5545	46.9033	30.1097	5.38931	351.384	345.995	256.459	W	0.000233408	0.00029176	0.000350112
1966	Intact	D	12	92.7116	29.5059	155676	1608.06	474.451	333.992	Tongue-shaped	5101	5314	213	5208.18	4.22301	44.892	40.669	22.682	0	357.455	357.455	306.381	NW	0.0019317	0.00241462	0.00289755
1967	Intact	T	10	92.7119	29.5283	52480.1	918.293	176.653	327.239	Lobate-shaped	5157	5217	60	5192.34	0.983516	28.8662	27.8827	11.3533	0	354.472	354.472	104.378	E	0.000523921	0.000654902	0.000785882
1968	Intact	T	9	92.7119	29.8161	28260.8	658.463	198.538	159.522	Tongue-shaped	5045	5175	130	5084.63	1.43355	50.246	48.8125	27.1709	95.9061	298.61	202.704	261.788	W	0.000249283	0.000311604	0.000373925
1969	Intact	T	11	92.7128	29.5548	69779.3	1190.55	230.491	332.358	Lobate-shaped	5238	5342	104	5293.78	4.90604	31.001	26.095	15.4407	255.256	345.964	90.7073	304.873	NW	0.00073747	0.000921837	0.0011062
1970	Intact	T	11	92.7132	29.3909	68967.3	1280.98	416.359	334.23	Tongue-shaped	4959	5211	252	5040.15	1.43355	47.7942	46.3606	25.6277	4.57392	349.287	344.713	294.707	NW	0.000727185	0.000908981	0.00109078
1971	Intact	T	11	92.7132	29.3706	27518.2	725.218	104.567	287.286	Lobate-shaped	5100	5188	88	5139.59	9.85982	41.952	32.0922	24.9278	19.2693	77.3073	58.038	43.3993	NE	0.000241444	0.000301805	0.000362166
1972	Intact	T	12	92.714	29.6758	29419.3	814.21	127.509	336.08	Lobate-shaped	5357	5439	82	5389.68	5.90118	25.0326	19.1314	15.0873	54.7276	139.014	84.2866	102.206	E	0.000261596	0.000326995	0.000392393
1973	Intact	T	12	92.7147	29.4736	215424	2337.3	508.416	374.032	Tongue-shaped	5006	5212	206	5108.45	0.347755	38.367	38.0192	15.2695	13.1726	356.424	343.251	267.862	W	0.0028525	0.00356562	0.00427875
1974	Intact	T	12	92.7155	29.5165	193675	1817.07	300.014	694.572	Lobate-shaped	4974	5095	121	5019.04	3.54195	38.3284	34.7864	18.793	6.70984	355.03	348.32	292.914	NW	0.0025105	0.00313812	0.00376574
1975	Intact	T	10	92.7158	29.1602	120073	1931.73	875.556	143.699	Tongue-shaped	4873	5156	283	5003.02	6.36714	40.7383	34.3711	19.9536	209.476	329.574	120.098	273.561	W	0.00141451	0.00176814	0.00212177
1976	Intact	T	10	92.716	29.1711	35835.3	855.544	113.279	360.604	Lobate-shaped	4725	4801	76	4761.48	5.73719	33.2239	27.4867	19.8004	245.618	354.806	109.187	280.833	W	0.000331471	0.000414339	0.000497207
1977	Intact	T	10	92.7164	29.4004	28435.2	772.704	91.4374	321.472	Lobate-shaped	4913	4963	50	4941.09	9.0522	28.4635	19.4113	21.7353	263.928	338.875	74.9477	296.473	NW	0.000251131	0.000313913	0.000376696
1978	Intact	T	11	92.7165	29.557	81343.5	1186.28	243.311	401.538	Lobate-shaped	5304	5390	86	5335.48	1.73826	44.7338	42.9955	18.1667	2.48955	358.958	356.469	295.983	NW	0.000886462	0.00110808	0.00132969
1979	Intact	D	12	92.7166	29.4262	71720.8	1339.17	583.184	184.591	Tongue-shaped	4952	5223	271	5082.73	11.209	52.3876	41.1786	27.3699	11.8301	107.379	95.5488	73.8281	E	0.000762161	0.000952702	0.00114324
1980	Intact	T	11	92.7173	29.4933	24215.4	620.597	134.357	242.305	Lobate-shaped	5375	5411	36	5392.82	7.89502	27.1616	19.2666	16.2274	180	252.181	72.1811	212.728	SW	0.000207101	0.000258876	0.000310652
1981	Intact	T	10	92.7182	29.4032	57376.3	935.186	251.133	242.007	Tongue-shaped	4897	5002	105	4933.38	1.39077	54.2985	52.9077	21.0857	0.90938	348.341	347.431	269.71	W	0.000583112	0.00072889	0.000874668
1982	Intact	T	12	92.7184	29.5093	39598.2	1013.19	411.85	100.411	Tongue-shaped	5246	5358	112	5311.37	5.93141	33.9355	28.0041	18.1616	191.725	322.224	130.499	269.726	W	0.000373665	0.000467081	0.000560498
1983	Intact	D	11	92.7185	29.7756	82039.4	1092.44	269.024	340.149	Lobate-shaped	5298	5383	85	5349.4	0.347755	35.1972	34.8494	15.0645	0.545657	357.184	356.639	104.637	E	0.00089557	0.00111946	0.00134336
1984	Intact	T	11	92.7186	29.5917	121369	1520.25	250.35	628.523	Lobate-shaped	5345	5481	136	5416.48	7.97672	44.4669	36.4901	25.7083	225.843	321.009	95.1665	266.713	W	0.00143286	0.00179107	0.00214928
1985	Intact	T	10	92.7192	29.1566	32518.6	763.004	294.051	134.105	Tongue-shaped	4931	5025	94	4971.14	10.3253	36.6569	26.3315	20.3296	223.409	301.373	77.9642	267.932	W	0.000295006	0.000368757	0.000442509
1986	Intact	D	11	92.7194	29.1663	122755	1483.55	589.139	257.379	Tongue-shaped	4855	5092	237	4957.15	2.53008	51.1403	48.6103	22.0778	1.21887	358.091	356.872	284.334	W	0.00145251	0.00181564	0.00217876
1987	Intact	T	10	92.7196	29.3855	49587.8	952.01	381.288	155.128	Tongue-shaped	5211	5309	98	5255.42	7.32866	33.942	26.6133	17.4317	35.9982	164.358	128.36	98.4948	E	0.000489465	0.000611832	0.000734198
1988	Intact	T	10	92.7201	29.5777	114801	1573.87	532.706	213.212	Tongue-shaped	5278	5447	169	5358.51	5.15586	56.6319	51.4761	20.7452	204.444	312.054	107.61	255.023	W	0.00134031	0.00167539	0.00201047
1989	Intact	T	11	92.7201	29.3767	106205	1927.65	137.043	900.973	Lobate-shaped	5003	5243	240	5102.44	5.6428	40.189	34.5462	20.9003	23.7026	102.529	78.8262	62.4915	NE	0.00122081	0.00152601	0.00183121
1990	Relict	T	12	92.7202	29.4514	61203.8	977.278	260.625	337.146	Lobate-shaped	4706	4840	134	4763.03	11.6405	45.5954	33.9549	28.8033	0	359.63	359.63	317.991	NW
1991	Intact	D	13	92.7205	29.4267	135015	1929.72	816.239	165.104	Tongue-shaped	4786	5123	337	4964.08	10.035	45.8049	35.7699	24.9668	4.03771	358.122	354.084	58.4527	NE	0.00162829	0.00203536	0.00244243
1992	Intact	D	11	92.7206	29.1945	72768.3	1197.85	386.545	241.251	Tongue-shaped	4904	5013	109	4944.9	1.55485	37.4187	35.8639	18.4331	0	357.397	357.397	149.347	SE	0.000775538	0.000969423	0.00116331
1993	Intact	T	11	92.7206	29.3838	13982	468.175	88.5295	169.762	Lobate-shaped	5202	5260	58	5231.44	22.5319	37.4327	14.9008	28.2463	55.508	81.5289	26.0208	70.0852	E	0.000107141	0.000133926	0.000160711
1994	Intact	T	11	92.7206	29.6716	58539.3	990.333	264.382	298.846	Lobate-shaped	5196	5292	96	5260.99	0	31.2889	31.2889	17.1843	-1	358.264	359.264	89.0818	E	0.000597323	0.000746654	0.000895985
1995	Intact	T	10	92.7208	29.4814	30412.1	663.313	168.499	221.043	Lobate-shaped	5201	5249	48	5228.94	5.38279	28.772	23.3892	17.357	233.366	311.987	78.6213	258.7	W	0.000272225	0.000340282	0.000408338
1996	Intact	D	13	92.7209	29.795	40918.5	823.919	236.669	135.835	Tongue-shaped	5235	5305	70	5281.2	0.347755	35.11	34.7623	15.7786	0	351.87	351.87	116.26	SE	0.000388665	0.000485832	0.000582998
1997	Intact	T	10	92.7211	29.4831	13260.9	444.178	123.208	162.436	Lobate-shaped	5224	5256	32	5241.57	10.4755	22.0828	11.6072	17.2221	245.41	293.962	48.5526	271.583	W	0.000100545	0.000125681	0.000150818
1998	Intact	T	11	92.7211	29.4784	44799	858.665	330.491	145.749	Tongue-shaped	5189	5327	138	5240.53	5.90118	43.2284	37.3273	24.237	234.782	293.405	58.6223	268.607	W	0.000433306	0.000541633	0.000649959
1999	Intact	T	10	92.7213	29.4678	56288.7	1137.02	160.92	391.154	Lobate-shaped	5077	5202	125	5146.9	4.44456	36.5396	32.0951	16.196	203.629	321.654	118.025	278.356	W	0.000569873	0.000712341	0.00085481
[truncated: 3,054 more rows]
